# Supplementary material for: Integration of mRNA and miRNA Analysis Reveals the Post-Transcriptional Regulation of Salt Stress Response in Hemerocallis fulva
Source: MDPI journal article supplement (doi:10.3390/ijms24087290), 2023-04-14
Supplement: s1 [file s1]

**Table S1** Primers for real-time reverse transcription-PCR validated miRNAs and targets

| Gene ID          | Reverse transcription primer sequence | Forward primer sequence     |
|------------------|---------------------------------------|-----------------------------|
| HFmiR393a        | GTCGTATCCAGTGCAGGGTCCGAGGTAT          | CGCCAGTCCAAAGGGATCGCA       |
| Stem-loop Primer | TCGCACTGGATACGACGAATCA                | T                           |
| HFmiR396b        | GTCGTATCCAGTGCAGGGTCCGAGGTAT          | CGCCAGTCCACAGCTTTCT         |
| Stem-loop Primer | TCGCACTGGATACGACAGTTCA                |                             |
| HFmiR160b        | GTCGTATCCAGTGCAGGGTCCGAGGTAT          | ACTCAATGCCTGGTTCCTTGT       |
| Stem-loop Primer | TCGCACTGGATACGACTGGCAT                |                             |
| HFmiR156a        | GTCGTATCCAGTGCAGGGTCCGAGGTAT          | CGCCAGTGACAGAAGAGAGT        |
| Stem-loop Primer | TCGCACTGGATACGACGTGCTC                |                             |
| RT-Universal     | CCAGTGCAGGGTCCGAGGTA                  |                             |
| Reverse Primer   |                                       |                             |
| HFACTIN          | ATCACGGATGGCTGGAAGAGGAC               | CTGAGCGGGAAGTTGTAAGGG<br>AC |
| HFGRF4           | AGGATTGGGTCTGGCTCTCG                  | GGATGAGGTGGATGGGTACG        |
| HFTIR1           | GGTTGCCCAAAGTTGACCAC                  | TGGTAAGAAGGCCGAGAGA         |
| HFARF18          | CTTGGA CTCTCAGCTCTGGC                 | TCATTCCTCGGATCGGCTG         |
| HFSPL12          | AAGCTGCCGTAGGCGTTTAT                  | ATGAGTGATGCTGAAGCCCC        |
