# Supplementary material for: Integration of mRNA and miRNA Analysis Reveals the Post-Transcriptional Regulation of Salt Stress Response in Hemerocallis fulva
Source: Int J Mol Sci. 2023 Apr 14;24(8):7290. doi: 10.3390/ijms24087290 (PMC10139057; doi:10.3390/ijms24087290)
Supplement: Supplementary file 1 [file ijms-24-07290-s001.zip]

Archive with 13 entries (13 files):
- Supplementary figures.pdf
- Table S1.pdf
- Table S10.xlsx
- Table S11.xlsx
- Table S12.xlsx
- Table S2 Distribution of small RNA reads among different categories in the sRNA library of H. fulva.xlsx
- Table S3.xlsx
- Table S4.xlsx
- Table S5.xlsx
- Table S6.xlsx
- Table S7.xlsx
- Table S8.xlsx
- Table S9.xlsx
