# Supplementary material for: Integration of mRNA and miRNA Analysis Reveals the Post-Transcriptional Regulation of Salt Stress Response in Hemerocallis fulva
Source: Int J Mol Sci. 2023 Apr 14;24(8):7290. doi: 10.3390/ijms24087290 (PMC10139057; doi:10.3390/ijms24087290)
Supplement: Supplementary file 1 [file ijms-24-07290-s001.zip › Table S2 Distribution of small RNA reads among different categories in the sRNA library of H. fulva.xlsx]

## Sheet: Sheet2
Table S2 Distribution of small RNA reads among different categories in the sRNA library of H. fulva
		NT_root1				NT_root2				NT_root3				NaCl_root1				NaCl_root2				NaCl_root3				NT_leaf1				NT_leaf2				NT_leaf3				NaCl_leaf1				NaCl_leaf2				NaCl_leaf3
lib	type	Total	% of Total	uniq	% of uniq	Total	% of Total	uniq	% of uniq	Total	% of Total	uniq	% of uniq	Total	% of Total	uniq	% of uniq	Total	% of Total	uniq	% of uniq	Total	% of Total	uniq	% of uniq	Total	% of Total	uniq	% of uniq	Total	% of Total	uniq	% of uniq	Total	% of Total	uniq	% of uniq	Total	% of Total	uniq	% of uniq	Total	% of Total	uniq	% of uniq	Total	% of Total	uniq	% of uniq
Raw reads	NA	14865342	100	4206214	100	18851575	100	4408373	100	18287532	100	3633882	100	12568988	100	851347	100	13876785	100	2315290	100	16732576	100	1573145	100	12993786	100	1732656	100	13135833	100	2813720	100	13007385	100	1208422	100	12830180	100	4061074	100	16840301	100	892693	100	13153054	100	1294002	100
3ADT&length filter	Sequence type	6479271	43.59	942414	22.41	10023028	53.17	783107	17.76	9081497	49.66	1454692	40.03	11309239	89.98	486572	57.15	10510460	75.74	1126760	48.67	13878162	82.94	792961	50.41	8524991	65.61	434531	25.08	5222268	39.76	664097	23.6	10807436	83.09	587585	48.62	3206475	24.99	480870	11.84	15192785	90.22	268419	30.07	10413906	79.17	365782	28.27
Junk reads	Sequence type	178026	1.2	45807	1.09	81241	0.43	55520	1.26	60444	0.33	33218	0.91	8465	0.07	2813	0.33	14475	0.1	10374	0.45	23730	0.14	6383	0.41	20432	0.16	13478	0.78	39685	0.3	24501	0.87	10607	0.08	5537	0.46	84818	0.66	50937	1.25	12610	0.07	6629	0.74	14532	0.11	10283	0.79
Rfam	RNA class	915112	6.16	12196	0.29	795434	4.22	12329	0.28	1542860	8.44	15089	0.42	257579	2.05	4729	0.56	470720	3.39	9028	0.39	574339	3.43	6866	0.44	858421	6.61	6651	0.38	516026	3.93	12947	0.46	666202	5.12	5620	0.47	362352	2.82	10494	0.26	412583	2.45	2019	0.23	319591	2.43	3877	0.3
mRNA	RNA class	2281519	15.35	45944	1.09	1766036	9.37	53567	1.22	3529630	19.3	46428	1.28	588666	4.68	8711	1.02	987282	7.11	18731	0.81	1328883	7.94	14109	0.9	1321743	10.17	20340	1.17	2451389	18.66	44275	1.57	679552	5.22	11494	0.95	2066431	16.11	49844	1.23	463424	2.75	5560	0.62	687595	5.23	11547	0.89
Repeats	RNA class	13385	0.09	194	0	17810	0.09	215	0	27136	0.15	354	0.01	4188	0.03	84	0.01	24113	0.17	180	0.01	7038	0.04	109	0.01	4645	0.04	107	0.01	10174	0.08	199	0.01	13416	0.1	92	0.01	6972	0.05	144	0	1617	0.01	44	0	3109	0.02	64	0
valid reads	Sequence type	5556996	37.38	3166003	75.27	6484978	34.4	3510513	79.63	5022771	27.47	2090964	57.54	581308	4.62	351102	41.24	2104109	15.16	1154452	49.86	1374563	8.21	756572	48.09	2782013	21.41	1260721	72.76	5160320	39.28	2073790	73.7	1139420	8.76	600689	49.71	7308122	56.96	3473930	85.54	1047458	6.22	610981	68.44	1847073	14.04	904228	69.88
rRNA	RNA class	650567	4.38	8192	0.19	323566	1.72	8196	0.19	1113799	6.09	9343	0.26	173142	1.38	3057	0.36	237109	1.71	5360	0.23	413452	2.47	4339	0.28	97982	0.75	4583	0.26	240021	1.83	9475	0.34	133965	1.03	3065	0.25	165170	1.29	7994	0.2	20370	0.12	1031	0.12	49767	0.38	2072	0.16
tRNA	RNA class	169012	1.14	2328	0.06	407469	2.16	2347	0.05	308910	1.69	3278	0.09	62422	0.5	1002	0.12	193273	1.39	2474	0.11	94212	0.56	1344	0.09	742183	5.71	1398	0.08	245741	1.87	2249	0.08	512871	3.94	1884	0.16	175812	1.37	1428	0.04	386567	2.3	773	0.09	257323	1.96	1274	0.1
snoRNA	RNA class	15464	0.1	314	0.01	24713	0.13	356	0.01	54496	0.3	862	0.02	5107	0.04	133	0.02	12740	0.09	300	0.01	8607	0.05	261	0.02	7996	0.06	107	0.01	7511	0.06	197	0.01	6244	0.05	215	0.02	5015	0.04	206	0.01	1955	0.01	41	0	4242	0.03	142	0.01
snRNA	RNA class	10378	0.07	484	0.01	11226	0.06	485	0.01	21884	0.12	713	0.02	5341	0.04	241	0.03	9595	0.07	377	0.02	22800	0.14	493	0.03	3575	0.03	216	0.01	5147	0.04	304	0.01	2543	0.02	166	0.01	4577	0.04	302	0.01	1758	0.01	91	0.01	3825	0.03	189	0.01
other Rfam RNA	RNA class	69691	0.47	878	0.02	28460	0.15	945	0.02	43771	0.24	893	0.02	11567	0.09	296	0.03	18003	0.13	517	0.02	35268	0.21	429	0.03	6685	0.05	347	0.02	17606	0.13	722	0.03	10579	0.08	290	0.02	11778	0.09	564	0.01	1933	0.01	83	0.01	4434	0.03	200	0.02
