# Supplementary material for: Integration of mRNA and miRNA Analysis Reveals the Post-Transcriptional Regulation of Salt Stress Response in Hemerocallis fulva
Source: Int J Mol Sci. 2023 Apr 14;24(8):7290. doi: 10.3390/ijms24087290 (PMC10139057; doi:10.3390/ijms24087290)
Supplement: Supplementary file 1 [file ijms-24-07290-s001.zip › Table S3.xlsx]

## Sheet: Sheet1
Table S3 Length distribution of counts of sRNAs identified in this study
	NT_root1				NT_root2				NT_root3				NaCl_root1				NaCl_root2				NaCl_root3				NT_leaf1				NT_leaf2				NT_leaf3				NaCl_leaf1				NaCl_leaf2				NaCl_leaf3
Length	Total	% of Total	uniq	% of uniq	Total	% of Total	uniq	% of uniq	Total	% of Total	uniq	% of uniq	Total	% of Total	uniq	% of uniq	Total	% of Total	uniq	% of uniq	Total	% of Total	uniq	% of uniq	Total	% of Total	uniq	% of uniq	Total	% of Total	uniq	% of uniq	Total	% of Total	uniq	% of uniq	Total	% of Total	uniq	% of uniq	Total	% of Total	uniq	% of uniq	Total	% of Total	uniq	% of uniq
18	165218	2.97	73926	2.33	189035	2.91	78968	2.25	469058	9.34	170871	8.17	69238	11.91	39696	11.31	197565	9.39	95135	8.24	127826	9.3	72835	9.63	118883	4.27	37898	3.01	217272	4.21	51574	2.49	108807	9.55	41492	6.91	189090	2.59	45834	1.32	41316	3.94	21673	3.55	96729	5.24	31605	3.5
19	186057	3.35	81371	2.57	220828	3.41	90323	2.57	478354	9.52	174487	8.34	67875	11.68	38917	11.08	183874	8.74	97265	8.43	135376	9.85	73784	9.75	162888	5.86	47143	3.74	240512	4.66	62677	3.02	119122	10.45	39791	6.62	190249	2.6	59410	1.71	53876	5.14	25484	4.17	110658	5.99	36509	4.04
20	281654	5.07	103107	3.26	397308	6.13	116103	3.31	520382	10.36	193661	9.26	85574	14.72	39438	11.23	257130	12.22	105502	9.14	205237	14.93	77434	10.23	297563	10.7	70731	5.61	367010	7.11	98166	4.73	111794	9.81	44243	7.37	349150	4.78	94938	2.73	84716	8.09	33971	5.56	192152	10.4	47858	5.29
21	828751	14.91	275775	8.71	1170416	18.05	336057	9.57	709610	14.13	261636	12.51	115864	19.93	59017	16.81	519416	24.69	206061	17.85	263181	19.15	119696	15.82	763226	27.43	229939	18.24	1458187	28.26	357169	17.22	144328	12.67	73227	12.19	1605429	21.97	377339	10.86	235191	22.45	96492	15.79	453290	24.54	137050	15.16
22	933554	16.8	454272	14.35	1170906	18.06	536871	15.29	743597	14.8	295158	14.12	96461	16.59	58819	16.75	376509	17.89	200587	17.38	247933	18.04	130786	17.29	602993	21.67	260640	20.67	1122843	21.76	390984	18.85	165030	14.48	86996	14.48	1362939	18.65	483072	13.91	226050	21.58	114192	18.69	333774	18.07	163617	18.09
23	459775	8.27	300995	9.51	492833	7.6	344366	9.81	686373	13.67	310493	14.85	42144	7.25	31041	8.84	128418	6.1	94467	8.18	114760	8.35	74767	9.88	192051	6.9	118982	9.44	430478	8.34	193286	9.32	122676	10.77	78989	13.15	557517	7.63	288338	8.3	85311	8.14	58856	9.63	131032	7.09	76971	8.51
24	2436266	43.84	1728411	54.59	2642982	40.76	1875788	53.43	1078149	21.47	547652	26.19	89279	15.36	74450	21.2	398957	18.96	327003	28.33	233348	16.98	179583	23.74	604457	21.73	472166	37.45	1216110	23.57	872027	42.05	273572	24.01	205031	34.13	2843510	38.91	2006857	57.77	302069	28.84	246981	40.42	492595	26.67	388067	42.92
25	265721	4.78	148146	4.68	200670	3.09	132037	3.76	337248	6.71	137006	6.55	14873	2.56	9724	2.77	42240	2.01	28432	2.46	46902	3.41	27687	3.66	39952	1.44	23222	1.84	107908	2.09	47907	2.31	94091	8.26	30920	5.15	210238	2.88	118142	3.4	18929	1.81	13332	2.18	36843	1.99	22551	2.49
valid reads	5556996		3166003		6484978		3510513		5022771		2090964		581308		351102		2104109		1154452		1374563		756572		2782013		1260721		5160320		2073790		1139420		600689		7308122		3473930		1047458		610981		1847073		904228
