# Supplementary material for: Integration of mRNA and miRNA Analysis Reveals the Post-Transcriptional Regulation of Salt Stress Response in Hemerocallis fulva
Source: Int J Mol Sci. 2023 Apr 14;24(8):7290. doi: 10.3390/ijms24087290 (PMC10139057; doi:10.3390/ijms24087290)
Supplement: Supplementary file 1 [file ijms-24-07290-s001.zip › Table S4.xlsx]

## Sheet: Sheet1
Table S4 The known and novel miRNAs identified in H. fulva
Item	Description
Pre-miRNA Index	Pre-miRNA Cluster Index
miRNA_Index	mature miRNA
miR_name	The miR_name is composed of the 1st known miR name in a cluster, a underscore, and a matching annotation: such as
	L-n means the miRNA_seq (detected) is n base less than known rep_miRSeq in the left side;
	R-n means the miRNA_seq (detected) is n base less than known rep_miRSeq in the right side;
	L+n means the miRNA_seq (detected) is n base more than known rep_miRSeq in the left side;
	R+n means the miRNA_seq (detected) is n base more than known rep_miRSeq in the right side;
	2ss5TC13TA means 2 substitution (ss), which are T->C at position 5 and T->A at position 13
	if there is no matching annotation, the miRNA_seq (detected) is exactly same as known rep_miRSeq.
	New discovered 5p/3p sequence has been annotated as p3/p5: which is directly differentiate with the reported sequences,
miR_seq	is a read at 5' or 3' of maximum mapped score in each cluster.
len	miR_seq length
genome ID	Reference Genome Information
strand	strand "+" or "-"
start	pre-miRNA start position
end	Pre-miRNA end position
pre-miRNA_seq	pre-miRNA sequence
#mir/MIR	mapped mir numbers in miRbase, the number in this item eaquals to the sum of mirIDs
mirIDs	is all mirID in a cluster, seprated by ,
rep_mirID	is the representative known mirID
rep_mirSeq	is the representative known mir sequence
rep_miRID	is the representative known miRID
rep_miRSeq	is the representative known miR sequence
type	is 5' or 3', which means the cluster appears at 5' or 3' end
Sequence in miRbase	New, miRNA identified in this study and not reported in miRBase,mainly for new reported 5p or 3p sequence; Diff, confirming miRNA sequences in miRBase, but different sequences are reported in our study; and Yes, confirming miRNA sequences in miRBase.
	gp2a:Reads were mapped to miRNAs/pre-miRNAs of selected species in miRbase and the mapped pre-miRNAs were not further mapped to genome, but the reads (and of course the miRNAs of the pre-miRNAs) were mapped to genome. The extended genome sequences from the genome loci may form hairpins.
	gp2b:Reads were mapped to miRNAs/pre-miRNAs of selected species in miRbase and the mapped pre-miRNAs were not further mapped to genome, but the reads (and of course the miRNAs of the pre-miRNAs) were mapped to genome. The extended genome sequences from the genome loci may not form hairpins.
	gp1:Reads were mapped to miRNAs/pre-miRNAs of specific species in miRbase and the pre-miRNAs were further mapped to genome & EST.
	gp3:Reads were mapped to miRNAs/pre-miRNAs of selected species in miRbase and the mapped pre-miRNAs were not further mapped to genome, and the reads were not mapped to genome, either. but the reads were mapped to the miRNAS(Matures)
	gp4:Reads were not mapped to pre-miRNAs of selected species in miRbase. But the reads were mapped to genome & the extended genome sequences from genome may form hairpins.
SS	Secondary Structure
	Criteria:
	1.number of nucleotides in one bulge in stem : <= 12
	2.number of base pairs in the stem region of the predicted hairpin : >= 16
	3.cutoff of free energy : kCal/mol <= -15
	4.length of hairpin : up and down stems + terminal loop >= 50
	8.number of biased bulges in mature region : <= 2
	10.number of base pairs in the mature region of the predicted hairpin : >= 12
	11.percent of mature in stem : >= 80
hairpinLen	pre-miRNA length
CG%	GC Content
dG	Free energy
MFEI	MFEI = -dG*100/mirLen/CG%. Reference: Cell. Mol. Life Sci. 63 (2006) 246-254.
raw	Raw data; from #reads(all),is the number of reads for isoform at 5' or 3' end.
norm	Normalized data
Expression Level	High:The number of reads in the following reported miRNAs is higher than the average copy of the data set.Medium:The number of reads in the following reported miRNAs is higher than 10 and less than average copy of the data set.Low:The number of reads in the following reported miRNAs is less than 10
Summary of known and predicted miRNA in this study.
Pre-miRNA Index	miRNA_Index	miR_name	miR_seq	len	genomeID	strand	start	end	pre-miRNA_seq	#mir/MIR	mirIDs,	rep_mirID	rep_mirSeq	rep_miRID	rep_miRSeq	type	Sequence in miRbase	group	SS	hairpinLen	CG%	dG	MFEI	NaCl_leaf1(raw)	NaCl_leaf2(raw)	NaCl_leaf3(raw)	NaCl_root1(raw)	NaCl_root2(raw)	NaCl_root3(raw)	NT_leaf1(raw)	NT_leaf2(raw)	NT_leaf3(raw)	NT_root1(raw)	NT_root2(raw)	NT_root3(raw)	NaCl_leaf1(norm)	NaCl_leaf2(norm)	NaCl_leaf3(norm)	NaCl_root1(norm)	NaCl_root2(norm)	NaCl_root3(norm)	NT_leaf1(norm)	NT_leaf2(norm)	NT_leaf3(norm)	NT_root1(norm)	NT_root2(norm)	NT_root3(norm)	Expression level
1	1	aof-miR156a	TGACAGAAGAGAGTGAGCAC	20	chr2	-	424973767	424973872	aatggaggtTGACAGAAGAGAGTGAGCACccatggtgtctttcttgcatgaggagttacatgcttgaaactatgtgtgctcactctctatttgtcacccaccacca	4	aof-MIR156a,stu-MIR156k,stu-MIR156i,stu-MIR156j,	aof-MIR156a	taatggaggtTGACAGAAGAGAGTGAGCACtcatggttttcttgcatacagttcatgcttgaagctatgcgtgctcacttctctttctgtcacccaccacca	aof-miR156a	TGACAGAAGAGAGTGAGCAC	5'	Yes	gp1	..(((.((.((((((((((((((((((((.((((((....(((..(((((........)))))..))))))))).))))))))))))).))))))).)).)))...	101	46.2	-54	1.1	3771.5	201.5	811.5	553.5	4908.5	1433	2638	6998.5	56	1993	3215	541	1419.16	476.746	777.349	2503.25	3463.5	1913.88	1806.91	4269.46	272.644	1090.12	1101.21	617.611	high
2	2	cpa-miR156a	TGACAGAAGAGAGTGAGCAC	20	chr11	-	185253884	185253970	TGACAGAAGAGAGTGAGCACccatggtgtctttcttgcattgggttgatgcttgaagctatgtgtgctcactgctctatctgtcatc	1	cpa-MIR156d,	cpa-MIR156d	TGACAGAAGAGAGTGAGCACccatggcgtttttcttgcatggatgttccatgctcgaagctctgcgtgctctctctctctctgtcatc	cpa-miR156a	TGACAGAAGAGAGTGAGCAC	5'	Yes	gp1	((((((((((((((((((((.((((((....(((..(((((.....)))))..))))))))).))))))))).)))).)))))))..	85	47.1	-44.7	1.1	3771.5	201.5	811.5	553.5	4908.5	1433	2638	6998.5	56	1993	3215	541	1419.16	476.746	777.349	2503.25	3463.5	1913.88	1806.91	4269.46	272.644	1090.12	1101.21	617.611	high
3	3	ptc-miR156g	TTGACAGAAGATAGAGAGCAC	21	chr6	+	259985162	259985271	tggtgatgctgTTGACAGAAGATAGAGAGCACagatgatgaaatgctacactggggatttgcatctctttcctttgtGCTCTCTATGCTTCTGTCATCaccttcagcccc	6	ptc-MIR156j,mes-MIR156h,vvi-MIR156g,aqc-MIR156b,aqc-MIR156a,hbr-MIR156,	ptc-MIR156j	ggtgatgttgTTGACAGAAGATAGAGAGCACagatgatgatatgcaatggactctgcatcccactcctttgtgctctctatgcttctgtcatcactttca	ptc-miR156g	TTGACAGAAGATAGAGAGCAC	5'	Yes	gp1	.(((((......(((((((((((((((((((((((.((.((.((((..............)))).))..)).)))))))))))))).)))))))))))))).........	100	46.4	-47.6	0.9	32	0	36	99	1264	391	7	87	0	111	346	79	12.0412	0	34.485	447.736	891.894	522.209	4.79468	53.0746	0	60.7142	118.513	90.1872	high
3	4	ptc-MIR156j-p3	GCTCTCTATGCTTCTGTCATC	21	chr6	+	259985162	259985271	tggtgatgctgTTGACAGAAGATAGAGAGCACagatgatgaaatgctacactggggatttgcatctctttcctttgtGCTCTCTATGCTTCTGTCATCaccttcagcccc	6	ptc-MIR156j,mes-MIR156h,vvi-MIR156g,aqc-MIR156b,aqc-MIR156a,hbr-MIR156,	ptc-MIR156j	ggtgatgttgTTGACAGAAGATAGAGAGCACagatgatgatatgcaatggactctgcatcccactcctttgtgctctctatgcttctgtcatcactttca	ptc-MIR156j-p3	gctctctatgcttctgtcatc	3'	New	gp1	.(((((......(((((((((((((((((((((((.((.((.((((..............)))).))..)).)))))))))))))).)))))))))))))).........	100	46.4	-47.6	0.9	0	0	0	0	21	12	0	0	0	0	0	0	0	0	0	0	14.8179	16.0269	0	0	0	0	0	0	middle
4	5	mes-miR171e_L-1_1ss9CG	TGAGCCGGGCCAATATCACT	20	chr4	-	94183831	94183922	agaaagcgatattggtgaggttcaatctgatgattggatttacaaaatcaggtggtaaagcagtctcagatTGAGCCGCGCCAATATCACTt	5	mtr-MIR171e,mes-MIR171e,mes-MIR171f,rco-MIR171g,ssl-MIR171b,	mes-MIR171f	agaaagcgatgttggtgaggttcaatccgaagacggatttacatattcagaattgtaaaagacgatctcagaTTGAGCCGCGCCAATATCACTttct	mes-miR171e	TTGAGCCGCGCCAATATCACT	3'	Diff	gp1	...(((.((((((((((.((((((((((((.(((((..(((((...........))))).))))))))))))))))).)))))))))).)))	89	41.3	-44.6	1.2	24	0	0	16	124	34	10	44	0	162	200	147	9.03088	0	0	72.3614	87.4959	45.4095	6.84955	26.8423	0	88.61	68.5048	167.817	middle
5	6	peu-MIR2916-p5_1ss6AG	ATACCGTCCTAGTCTCAACCATA	23	chr2	+	18644209	18644299	tgggggctcgaagacgatcagATACCGTCCTAGTCTCAACCATAaacgatgccgaccAGGGATCGGCGGATGTTGCTcttaggactccgcc	1	peu-MIR2916,	peu-MIR2916	TGGGGACTCGAAGACGATCATATaccatcctagtctcaaccataaacgatgccgaccagggattggcggatgttgcttctaggagtccgcca	peu-MIR2916-p5	ATaccatcctagtctcaaccata	5'	New	gp1	..((((((....((((.........))))..)))))).........((((.((.....)).))))(((((.(((........)))))))).	35	57.1	-25.9	0.5	1950	181	964	3469	4149	9453	904	2336	1247	20045	5389	10745	733.759	428.244	923.431	15688.9	2927.58	12625.2	619.199	1425.08	6071.2	10964.1	1845.86	12266.6	high
5	7	peu-MIR2916-p3_1ss7TC	AGGGATCGGCGGATGTTGCT	20	chr2	+	18644209	18644299	tgggggctcgaagacgatcagATACCGTCCTAGTCTCAACCATAaacgatgccgaccAGGGATCGGCGGATGTTGCTcttaggactccgcc	1	peu-MIR2916,	peu-MIR2916	TGGGGACTCGAAGACGATCATATaccatcctagtctcaaccataaacgatgccgaccagggattggcggatgttgcttctaggagtccgcca	peu-MIR2916-p3	agggattggcggatgttgct	3'	New	gp1	..((((((....((((.........))))..)))))).........((((.((.....)).))))(((((.(((........)))))))).	35	57.1	-25.9	0.5	2275	264	807	3597	2216	12924	970	2245	547	29725	6684	4152	856.052	624.62	773.038	16267.7	1563.64	17261	664.406	1369.57	2663.15	16258.8	2289.43	4739.96	high
1	1	osa-miR156a_L+1_1ss9AC	CTGACAGACGAGAGTGAGCAC	21	chr1	-	112184156	112184256	attagggCTGACAGAAGAGAGTGAGCACacagcgaaaattgcatcgatggatggtgccctattctgttgcgtGCTCACTTCTCTACCTGTCAGCctctttc	76	osa-MIR156f,osa-MIR156h,osa-MIR156c,osa-MIR156g,osa-MIR156b,bdi-MIR156b,bdi-MIR156f,bdi-MIR156e,bdi-MIR156i,sbi-MIR156i,sbi-MIR156f,zma-MIR156c,zma-MIR156f,zma-MIR156a,zma-MIR156g,tae-MIR156,ata-MIR156a,ata-MIR156e,ata-MIR156b,hvu-MIR156a,hvu-MIR156b,vca-MIR156a,sof-MIR156,ssp-MIR156,gma-MIR156k,gma-MIR156h,gma-MIR156a,gma-MIR156u,ptc-MIR156a,ptc-MIR156d,ptc-MIR156b,ptc-MIR156f,ptc-MIR156e,ptc-MI…	osa-MIR156b	ttgtcttgagaggggaagagatctctatgggttttggaggtcTGACAGAAGAGAGTGAGCACacacggtgctttcttagcatgcaagagccatgctgggagctgtgcgtGCTCACTCTCTATCTGTCAGCcgttcaccatgcccaatatgattaatctccttctctcagttgacag	osa-miR156a	TGACAGAAGAGAGTGAGCAC	5'	Diff	gp2a	....((((((((((.(((((((((((((.(((((((....((((((.....))))))....))).)))).)))))))).)))))..)))))))))).....	92	49.5	-51.3	1	0	0	8	0	7	0	0	3	0	0	0	6.5	0	0	7.66333	0	4.93928	0	0	1.83016	0	0	0	7.42046	low
1	2	osa-miR156f-3p_2ss13TA14TC	GCTCACTTCTCTACCTGTCAGC	22	chr1	-	112184156	112184256	attagggCTGACAGAAGAGAGTGAGCACacagcgaaaattgcatcgatggatggtgccctattctgttgcgtGCTCACTTCTCTACCTGTCAGCctctttc	76	osa-MIR156f,osa-MIR156h,osa-MIR156c,osa-MIR156g,osa-MIR156b,bdi-MIR156b,bdi-MIR156f,bdi-MIR156e,bdi-MIR156i,sbi-MIR156i,sbi-MIR156f,zma-MIR156c,zma-MIR156f,zma-MIR156a,zma-MIR156g,tae-MIR156,ata-MIR156a,ata-MIR156e,ata-MIR156b,hvu-MIR156a,hvu-MIR156b,vca-MIR156a,sof-MIR156,ssp-MIR156,gma-MIR156k,gma-MIR156h,gma-MIR156a,gma-MIR156u,ptc-MIR156a,ptc-MIR156d,ptc-MIR156b,ptc-MIR156f,ptc-MIR156e,ptc-MI…	osa-MIR156f	agtTGACAGAAGAGAGTGAGCACacagcggccagactgcatcgatctatcaatcttcccttcgacaggatagctagatagaaagaaagagaggccgtcggcggccatggaagagagagagagagagagatgaaatgatgatgatgatacagctgccgctgcgtGCTCACTTCTCTTTCTGTCAGCt	osa-miR156f-3p	GCTCACTTCTCTTTCTGTCAGC	3'	Diff	gp2a	....((((((((((.(((((((((((((.(((((((....((((((.....))))))....))).)))).)))))))).)))))..)))))))))).....	92	49.5	-51.3	1	9	0	23.5	0	4.5	0	3	5	0	0	0	7	3.38658	0	22.511	0	3.17525	0	2.05486	3.05027	0	0	0	7.99127	middle
2	1	osa-miR156a_L+1_1ss9AC	CTGACAGACGAGAGTGAGCAC	21	chr1	-	112351707	112351807	attagggCTGACAGAAGAGAGTGAGCACacagcgaaaattgcatcgatggatggtgccctattctgttgcgtGCTCACTTCTCTACCTGTCAGCctctttc	73	osa-MIR156f,osa-MIR156h,osa-MIR156b,osa-MIR156g,osa-MIR156c,bdi-MIR156b,bdi-MIR156e,bdi-MIR156i,bdi-MIR156f,sbi-MIR156i,sbi-MIR156f,zma-MIR156g,zma-MIR156f,zma-MIR156c,zma-MIR156a,tae-MIR156,ata-MIR156b,ata-MIR156a,ata-MIR156e,hvu-MIR156a,hvu-MIR156b,vca-MIR156a,sof-MIR156,ssp-MIR156,gma-MIR156k,gma-MIR156h,gma-MIR156u,gma-MIR156a,ptc-MIR156c,ptc-MIR156e,ptc-MIR156b,ptc-MIR156d,ptc-MIR156a,ptc-MI…	osa-MIR156c	ggaggaagagaggggtgagaggtgaggcTGACAGAAGAGAGTGAGCACacatggtgactttcttgcatgctgaatggactcatgcttgaagctatgtgtGCTCACTTCTCTCTCTGTCAGCcatttgatctctctttctctctttctcc	osa-miR156a	TGACAGAAGAGAGTGAGCAC	5'	Diff	gp2a	....((((((((((.(((((((((((((.(((((((....((((((.....))))))....))).)))).)))))))).)))))..)))))))))).....	92	49.5	-51.3	1	0	0	8	0	7	0	0	3	0	0	0	6.5	0	0	7.66333	0	4.93928	0	0	1.83016	0	0	0	7.42046	low
2	2	osa-miR156f-3p_2ss13TA14TC	GCTCACTTCTCTACCTGTCAGC	22	chr1	-	112351707	112351807	attagggCTGACAGAAGAGAGTGAGCACacagcgaaaattgcatcgatggatggtgccctattctgttgcgtGCTCACTTCTCTACCTGTCAGCctctttc	73	osa-MIR156f,osa-MIR156h,osa-MIR156b,osa-MIR156g,osa-MIR156c,bdi-MIR156b,bdi-MIR156e,bdi-MIR156i,bdi-MIR156f,sbi-MIR156i,sbi-MIR156f,zma-MIR156g,zma-MIR156f,zma-MIR156c,zma-MIR156a,tae-MIR156,ata-MIR156b,ata-MIR156a,ata-MIR156e,hvu-MIR156a,hvu-MIR156b,vca-MIR156a,sof-MIR156,ssp-MIR156,gma-MIR156k,gma-MIR156h,gma-MIR156u,gma-MIR156a,ptc-MIR156c,ptc-MIR156e,ptc-MIR156b,ptc-MIR156d,ptc-MIR156a,ptc-MI…	osa-MIR156f	agtTGACAGAAGAGAGTGAGCACacagcggccagactgcatcgatctatcaatcttcccttcgacaggatagctagatagaaagaaagagaggccgtcggcggccatggaagagagagagagagagagatgaaatgatgatgatgatacagctgccgctgcgtGCTCACTTCTCTTTCTGTCAGCt	osa-miR156f-3p	GCTCACTTCTCTTTCTGTCAGC	3'	Diff	gp2a	....((((((((((.(((((((((((((.(((((((....((((((.....))))))....))).)))).)))))))).)))))..)))))))))).....	92	49.5	-51.3	1	9	0	23.5	0	4.5	0	3	5	0	0	0	7	3.38658	0	22.511	0	3.17525	0	2.05486	3.05027	0	0	0	7.99127	middle
3	3	osa-miR156a_L+1	CTGACAGAAGAGAGTGAGCAC	21	chr10	+	19206371	19206528	gcatagaagaaaggcagCTGACAGAAGAGAGTGAGCACacaccggtaatggtgatataatggtagacatgtatatatatccttgtttgcttgttactgggtttccgTTGCGTGCTCACTTCTCTTTCTGtgagcttctgaatagctcaaatttctagg	73	osa-MIR156b,osa-MIR156g,osa-MIR156c,osa-MIR156f,osa-MIR156h,osa-MIR156l,bdi-MIR156i,bdi-MIR156e,bdi-MIR156f,sbi-MIR156f,sbi-MIR156i,zma-MIR156g,zma-MIR156a,zma-MIR156f,zma-MIR156c,zma-MIR156d,tae-MIR156,ata-MIR156b,ata-MIR156e,ata-MIR156a,hvu-MIR156b,vca-MIR156a,sof-MIR156,ssp-MIR156,mtr-MIR156d,gma-MIR156h,gma-MIR156k,gma-MIR156u,gma-MIR156a,ptc-MIR156c,ptc-MIR156e,ptc-MIR156f,ptc-MIR156a,ath-MI…	osa-MIR156f	agtTGACAGAAGAGAGTGAGCACacagcggccagactgcatcgatctatcaatcttcccttcgacaggatagctagatagaaagaaagagaggccgtcggcggccatggaagagagagagagagagagatgaaatgatgatgatgatacagctgccgctgcgtGCTCACTTCTCTTTCTGTCAGCt	osa-miR156a	TGACAGAAGAGAGTGAGCAC	5'	Diff	gp2a	...((((((...(((((((.((((((((((((((((((.((.(((.((((((((((....((((((((..............)))))))))))))))..))).))).)).))))))))).))))).)))).))))........)))....))))))..	153	42.4	-56.4	0.8	149.5	8.5	19.5	25.5	176.5	31.5	125.5	456	4.5	47	44	35.5	56.2548	20.1109	18.6794	115.326	124.541	42.0706	85.9618	278.184	21.9089	25.7078	15.0711	40.5272	middle
3	4	sbi-MIR156f-p3	TTGCGTGCTCACTTCTCTTTCTG	23	chr10	+	19206371	19206528	gcatagaagaaaggcagCTGACAGAAGAGAGTGAGCACacaccggtaatggtgatataatggtagacatgtatatatatccttgtttgcttgttactgggtttccgTTGCGTGCTCACTTCTCTTTCTGtgagcttctgaatagctcaaatttctagg	73	osa-MIR156b,osa-MIR156g,osa-MIR156c,osa-MIR156f,osa-MIR156h,osa-MIR156l,bdi-MIR156i,bdi-MIR156e,bdi-MIR156f,sbi-MIR156f,sbi-MIR156i,zma-MIR156g,zma-MIR156a,zma-MIR156f,zma-MIR156c,zma-MIR156d,tae-MIR156,ata-MIR156b,ata-MIR156e,ata-MIR156a,hvu-MIR156b,vca-MIR156a,sof-MIR156,ssp-MIR156,mtr-MIR156d,gma-MIR156h,gma-MIR156k,gma-MIR156u,gma-MIR156a,ptc-MIR156c,ptc-MIR156e,ptc-MIR156f,ptc-MIR156a,ath-MI…	sbi-MIR156f	gcTGACAGAAGAGAGTGAGCACgcatcggccagactgcatctatatacggctgctcctggcgagatatggatggatggatgtctaggcgcagctgctgttgcgtgctcacttctctttctgtcagctc	sbi-MIR156f-p3	ttgcgtgctcacttctctttctg	3'	New	gp2a	...((((((...(((((((.((((((((((((((((((.((.(((.((((((((((....((((((((..............)))))))))))))))..))).))).)).))))))))).))))).)))).))))........)))....))))))..	153	42.4	-56.4	0.8	145	0	15.5	0	21	5.5	102	269.5	0	10.5	16	25.5	54.5615	0	14.8477	0	14.8179	7.34566	69.8654	164.409	0	5.74324	5.48039	29.1111	middle
4	5	osa-MIR156f-p5	CAGAAGAGAGTGAGCACACAG	21	chr10	+	171540247	171540361	gttgctgaCAGAAGAGAGTGAGCACACAGcggcaatgggagtgtcgagtttaacggaatatatacaccgtactttctatttccgTTGCGTGCTCACTTCTCTTTCTGtcagcttc	51	aof-MIR156a,osa-MIR156f,osa-MIR156h,osa-MIR156l,osa-MIR156g,bdi-MIR156i,bdi-MIR156b,sbi-MIR156f,sbi-MIR156a,sbi-MIR156i,zma-MIR156g,zma-MIR156f,zma-MIR156d,zma-MIR156a,tae-MIR156,ata-MIR156e,hvu-MIR156b,hvu-MIR156a,vca-MIR156a,mtr-MIR156i,mtr-MIR156d,gma-MIR156h,gma-MIR156k,ptc-MIR156c,ptc-MIR156e,ptc-MIR156d,ptc-MIR156b,ath-MIR156a,mdm-MIR156d,mdm-MIR156l,mdm-MIR156f,mdm-MIR156n,aly-MIR156a,ppe-…	osa-MIR156f	agtTGACAGAAGAGAGTGAGCACacagcggccagactgcatcgatctatcaatcttcccttcgacaggatagctagatagaaagaaagagaggccgtcggcggccatggaagagagagagagagagagatgaaatgatgatgatgatacagctgccgctgcgtGCTCACTTCTCTTTCTGTCAGCt	osa-MIR156f-p5	CAGAAGAGAGTGAGCACacag	5'	New	gp2a	...((((((((((((((((((((((.((((((.((((((((.((........((((..........)))))))))))))).)))))).)))))))).)))).))))))))))...	109	47	-56.9	1.1	0	0	0	0	10	2.5	0	4	0	0	0	2.5	0	0	0	0	7.05612	3.33893	0	2.44021	0	0	0	2.85402	low
4	4	sbi-MIR156f-p3	TTGCGTGCTCACTTCTCTTTCTG	23	chr10	+	171540247	171540361	gttgctgaCAGAAGAGAGTGAGCACACAGcggcaatgggagtgtcgagtttaacggaatatatacaccgtactttctatttccgTTGCGTGCTCACTTCTCTTTCTGtcagcttc	51	aof-MIR156a,osa-MIR156f,osa-MIR156h,osa-MIR156l,osa-MIR156g,bdi-MIR156i,bdi-MIR156b,sbi-MIR156f,sbi-MIR156a,sbi-MIR156i,zma-MIR156g,zma-MIR156f,zma-MIR156d,zma-MIR156a,tae-MIR156,ata-MIR156e,hvu-MIR156b,hvu-MIR156a,vca-MIR156a,mtr-MIR156i,mtr-MIR156d,gma-MIR156h,gma-MIR156k,ptc-MIR156c,ptc-MIR156e,ptc-MIR156d,ptc-MIR156b,ath-MIR156a,mdm-MIR156d,mdm-MIR156l,mdm-MIR156f,mdm-MIR156n,aly-MIR156a,ppe-…	sbi-MIR156f	gcTGACAGAAGAGAGTGAGCACgcatcggccagactgcatctatatacggctgctcctggcgagatatggatggatggatgtctaggcgcagctgctgttgcgtgctcacttctctttctgtcagctc	sbi-MIR156f-p3	ttgcgtgctcacttctctttctg	3'	New	gp2a	...((((((((((((((((((((((.((((((.((((((((.((........((((..........)))))))))))))).)))))).)))))))).)))).))))))))))...	109	47	-56.9	1.1	145	0	15.5	0	21	5.5	102	269.5	0	10.5	16	25.5	54.5615	0	14.8477	0	14.8179	7.34566	69.8654	164.409	0	5.74324	5.48039	29.1111	middle
5	3	osa-miR156a_L+1	CTGACAGAAGAGAGTGAGCAC	21	chr2	+	339011322	339011463	aatgggtttgtgaggttttagggCTGACAGAAGAGAGTGAGCACacagcggaaattgcatcgatggatgaatgatgccctattctgttgcgtGCTCACTTCTCAATCTGTCAGCctctttctttctcaatccgcaacccttc	56	osa-MIR156b,osa-MIR156g,osa-MIR156c,osa-MIR156f,osa-MIR156h,bdi-MIR156e,bdi-MIR156i,bdi-MIR156f,bdi-MIR156b,sbi-MIR156i,sbi-MIR156f,zma-MIR156g,zma-MIR156c,zma-MIR156f,zma-MIR156a,tae-MIR156,ata-MIR156b,ata-MIR156a,ata-MIR156e,hvu-MIR156b,hvu-MIR156a,vca-MIR156a,sof-MIR156,ssp-MIR156,gma-MIR156u,gma-MIR156a,ptc-MIR156c,ptc-MIR156e,ptc-MIR156a,ptc-MIR156f,ath-MIR156b,ath-MIR156a,ath-MIR156c,bra-MI…	osa-MIR156f	agtTGACAGAAGAGAGTGAGCACacagcggccagactgcatcgatctatcaatcttcccttcgacaggatagctagatagaaagaaagagaggccgtcggcggccatggaagagagagagagagagagatgaaatgatgatgatgatacagctgccgctgcgtGCTCACTTCTCTTTCTGTCAGCt	osa-miR156a	TGACAGAAGAGAGTGAGCAC	5'	Diff	gp2a	...(((((..(((((....((((((((((((.((((((((((((.((((((((...(((((.((......)))))))....)))))))).)))))))).))))..)))))))))).)).....)))))......)))))...	136	47.2	-67.1	1	149.5	8.5	19.5	25.5	176.5	31.5	125.5	456	4.5	47	44	35.5	56.2548	20.1109	18.6794	115.326	124.541	42.0706	85.9618	278.184	21.9089	25.7078	15.0711	40.5272	middle
5	6	osa-miR156b-3p_2ss8-T12TA	GCTCACTTCTCAATCTGTCAGC	22	chr2	+	339011322	339011463	aatgggtttgtgaggttttagggCTGACAGAAGAGAGTGAGCACacagcggaaattgcatcgatggatgaatgatgccctattctgttgcgtGCTCACTTCTCAATCTGTCAGCctctttctttctcaatccgcaacccttc	56	osa-MIR156b,osa-MIR156g,osa-MIR156c,osa-MIR156f,osa-MIR156h,bdi-MIR156e,bdi-MIR156i,bdi-MIR156f,bdi-MIR156b,sbi-MIR156i,sbi-MIR156f,zma-MIR156g,zma-MIR156c,zma-MIR156f,zma-MIR156a,tae-MIR156,ata-MIR156b,ata-MIR156a,ata-MIR156e,hvu-MIR156b,hvu-MIR156a,vca-MIR156a,sof-MIR156,ssp-MIR156,gma-MIR156u,gma-MIR156a,ptc-MIR156c,ptc-MIR156e,ptc-MIR156a,ptc-MIR156f,ath-MIR156b,ath-MIR156a,ath-MIR156c,bra-MI…	osa-MIR156b	ttgtcttgagaggggaagagatctctatgggttttggaggtcTGACAGAAGAGAGTGAGCACacacggtgctttcttagcatgcaagagccatgctgggagctgtgcgtGCTCACTCTCTATCTGTCAGCcgttcaccatgcccaatatgattaatctccttctctcagttgacag	osa-miR156b-3p	GCTCACTCTCTATCTGTCAGC	3'	Diff	gp2a	...(((((..(((((....((((((((((((.((((((((((((.((((((((...(((((.((......)))))))....)))))))).)))))))).))))..)))))))))).)).....)))))......)))))...	136	47.2	-67.1	1	15	5	12	0	13	0	15	23	0	13	14	63	5.6443	11.8299	11.495	0	9.17296	0	10.2743	14.0312	0	7.11068	4.79534	71.9214	middle
6	7	sbi-miR156a_1ss20CT	TGACAGAAGAGAGTGAGCAT	20	chr11	-	185254129	185254234	taatggcgggtTGACAGAAGAGAGTGAGCACccatggtgtctttcttgtataaagtagatgcttgaagctatgcgtGCTCACTGCTCTATCTGTCATCccccacta	6	sbi-MIR156g,zma-MIR156i,stu-MIR156f,vvi-MIR156e,cca-MIR156b,han-MIR156a,	sbi-MIR156g	gTGACAGAAGAGAGTGAGCACacggccggcggaacggcaccggcggatgtgccgtcgcggccgcgtgctcactgctctatctgtcatcc	sbi-miR156a	TGACAGAAGAGAGTGAGCAC	5'	Diff	gp2a	...(((.(((.((((((((((((((((((((.((((((....(((..((((.......))))..))))))))).))))))))).)))).))))))).))))))...	100	47.2	-51.5	1	0	0	0	0	2.5	0	0	7	0	0	0	0	0	0	0	0	1.76403	0	0	4.27037	0	0	0	0	low
6	8	zma-miR156i-3p	GCTCACTGCTCTATCTGTCATC	22	chr11	-	185254129	185254234	taatggcgggtTGACAGAAGAGAGTGAGCACccatggtgtctttcttgtataaagtagatgcttgaagctatgcgtGCTCACTGCTCTATCTGTCATCccccacta	6	sbi-MIR156g,zma-MIR156i,stu-MIR156f,vvi-MIR156e,cca-MIR156b,han-MIR156a,	zma-MIR156i	cgcggcgggcggTGACAGAAGAGAGTGAGCACacggccgggcggaacggcaccggcggatggtgccgtcgcggacgcgtGCTCACTGCTCTATCTGTCATCcactctctcccccgct	zma-miR156i-3p	GCTCACTGCTCTATCTGTCATC	3'	Yes	gp2a	...(((.(((.((((((((((((((((((((.((((((....(((..((((.......))))..))))))))).))))))))).)))).))))))).))))))...	100	47.2	-51.5	1	7.5	0	0	0	17	4.5	4.5	9	0	6	27	40.5	2.82215	0	0	0	11.9954	6.01008	3.0823	5.49048	0	3.28185	9.24815	46.2352	middle
7	8	zma-miR156i-3p	GCTCACTGCTCTATCTGTCATC	22	chr11	+	185392596	185392766	aaagaagaggagatgataaagagagtgaatgatggagggttgacagaagagagtgagcacccatggtatctttcttgcattgggttgatgcttgaagctatgtgtGCTCACTGCTCTATCTGTCATCcaccaccaaccatctagttctctctctctctctctctctttctc	3	sbi-MIR156g,zma-MIR156i,han-MIR156a,	zma-MIR156i	cgcggcgggcggTGACAGAAGAGAGTGAGCACacggccgggcggaacggcaccggcggatggtgccgtcgcggacgcgtGCTCACTGCTCTATCTGTCATCcactctctcccccgct	zma-miR156i-3p	GCTCACTGCTCTATCTGTCATC	3'	Yes	gp2a	...((((((((((.((...((((((.(((((((((..(((((((((((((((((((((((.((((((....(((..(((((.....)))))..))))))))).))))))))).)))).)))))))......)))..)))))..)))).)))))).)))))).))))))...	165	45	-78.4	1	7.5	0	0	0	17	4.5	4.5	9	0	6	27	40.5	2.82215	0	0	0	11.9954	6.01008	3.0823	5.49048	0	3.28185	9.24815	46.2352	middle
8	9	osa-MIR156g-p5	CAGAAGAGAGTGAGCACACAG	21	chr8	+	183639367	183639487	gacggttgctgaCAGAAGAGAGTGAGCACACAGcggcaatggtagtgtcaagtttaacggaatatatactctactttccgtttccattgCGTGCTCACTTATCTTTCTGTCagcatcccat	41	aof-MIR156a,osa-MIR156g,osa-MIR156f,osa-MIR156h,bdi-MIR156i,bdi-MIR156b,sbi-MIR156i,sbi-MIR156a,sbi-MIR156f,zma-MIR156a,zma-MIR156g,zma-MIR156f,zma-MIR156d,tae-MIR156,ata-MIR156e,hvu-MIR156b,hvu-MIR156a,vca-MIR156a,mtr-MIR156i,gma-MIR156h,gma-MIR156k,ptc-MIR156c,ptc-MIR156e,ptc-MIR156b,ptc-MIR156d,mdm-MIR156f,mdm-MIR156n,ppe-MIR156e,mes-MIR156f,mes-MIR156e,vvi-MIR156b,csi-MIR156b,cme-MIR156j,cme-…	osa-MIR156g	ggcTGACAGAAGAGAGTGAGCACacagcgggcagactgcatctgaattacctgttgcgacgaagaagacgacggacgcagcttgccgttgcgtGCTCACTTCTCTCTCTGTCAGCt	osa-MIR156g-p5	CAGAAGAGAGTGAGCACacag	5'	New	gp2a	...((.(((((((((((((((((((((((.((..((.(((((.((((...(((.((........)).))).))))..))))).))..)).)))))))))).)).))))))))))).))...	115	45.5	-51.4	0.9	0	0	0	0	10	2.5	0	4	0	0	0	2.5	0	0	0	0	7.05612	3.33893	0	2.44021	0	0	0	2.85402	low
8	10	osa-miR156c-3p_L+3R-3_1ss16CT	CGTGCTCACTTCTCTTTCTGTC	22	chr8	+	183639367	183639487	gacggttgctgaCAGAAGAGAGTGAGCACACAGcggcaatggtagtgtcaagtttaacggaatatatactctactttccgtttccattgCGTGCTCACTTATCTTTCTGTCagcatcccat	41	aof-MIR156a,osa-MIR156g,osa-MIR156f,osa-MIR156h,bdi-MIR156i,bdi-MIR156b,sbi-MIR156i,sbi-MIR156a,sbi-MIR156f,zma-MIR156a,zma-MIR156g,zma-MIR156f,zma-MIR156d,tae-MIR156,ata-MIR156e,hvu-MIR156b,hvu-MIR156a,vca-MIR156a,mtr-MIR156i,gma-MIR156h,gma-MIR156k,ptc-MIR156c,ptc-MIR156e,ptc-MIR156b,ptc-MIR156d,mdm-MIR156f,mdm-MIR156n,ppe-MIR156e,mes-MIR156f,mes-MIR156e,vvi-MIR156b,csi-MIR156b,cme-MIR156j,cme-…	osa-MIR156g	ggcTGACAGAAGAGAGTGAGCACacagcgggcagactgcatctgaattacctgttgcgacgaagaagacgacggacgcagcttgccgttgcgtGCTCACTTCTCTCTCTGTCAGCt	osa-miR156c-3p	GCTCACTTCTCTCTCTGTCAGC	3'	Diff	gp2a	...((.(((((((((((((((((((((((.((..((.(((((.((((...(((.((........)).))).))))..))))).))..)).)))))))))).)).))))))))))).))...	115	45.5	-51.4	0.9	0	0	0	0	10.5	0	5.5	7	0	0	0	4	0	0	0	0	7.40893	0	3.76725	4.27037	0	0	0	4.56644	low
9	11	lus-miR156a_L+1R+1	CTGACAGAAGAGAGTGAGCACT	22	chr1	-	111909718	111909818	attagggCTGACAGAAGAGAGTGAGCACAcagcgaaaattgcatcgatggatggtgccctattctgttgcgtgctcacttctctacctgtcagcctctttc	4	lus-MIR156g,bra-MIR156e,bna-MIR156e,cas-MIR156a,	lus-MIR156g	ggatctttgtttctgggtaaggggtgaaagtaaggagaaacTGACAGAAGAGAGTGAGCACttagagaccattatgttatatgaatctataccattgtttttaggtgctcacttctctttctgtcggcttctcatccttcttcttcttcttcttcttcttgttttagattt	lus-miR156a	TGACAGAAGAGAGTGAGCAC	5'	Diff	gp2a	....((((((((((.(((((((((((((.(((((((....((((((.....))))))....))).)))).)))))))).)))))..)))))))))).....	92	49.5	-51.3	1	0	0	0	0	0	0	0	0	0	0	0	6.5	0	0	0	0	0	0	0	0	0	0	0	7.42046	low
10	12	stu-miR156f-5p_L-1R+1	TGACAGAAGAGAGTGAGCAT	20	chr11	-	185254261	185254366	taatggcgggtTGACAGAAGAGAGTGAGCACccatggtgtctttcttgtataaagtagatgcttgaagctatgcgtgctcactgctctatctgtcatcccccacta	6	ath-MIR156g,stu-MIR156f,aly-MIR156g,vvi-MIR156e,cas-MIR156g,cca-MIR156b,	stu-MIR156f	CTGACAGAAGAGAGTGAGCAtacacatataattatataaatatttttacttaattttcttgatatatattgtatatataattttgcgagtgCTCACTTCTCTTTCTGTCAATC	stu-miR156f-5p	CTGACAGAAGAGAGTGAGCA	5'	Diff	gp2a	...(((.(((.((((((((((((((((((((.((((((....(((..((((.......))))..))))))))).))))))))).)))).))))))).))))))...	100	47.2	-51.5	1	0	0	0	0	2.5	0	0	7	0	0	0	0	0	0	0	0	1.76403	0	0	4.27037	0	0	0	0	low
11	13	mtr-miR156b-3p_L-1_1ss15CT	GCTCACTCTCTATTTGTCACC	21	chr2	-	424973701	424973799	ggaggttgacagaagagagtgagcacccatggtgtctttcttgcatgaggagttacatgcttgaaactatgtgtGCTCACTCTCTATTTGTCACCcacc	10	mtr-MIR156b,gma-MIR156v,ptc-MIR156b,aly-MIR156f,nta-MIR156b,nta-MIR156d,nta-MIR156f,csi-MIR156c,bra-MIR156d,bra-MIR156b,	mtr-MIR156b	ggaggTGACAGAAGAGAGTGAGCACacatggtactttcgtgtatgatgtttcattctcgaagctatgtgTGCTCACTCTCTATCTGTCACCccat	mtr-miR156b-3p	TGCTCACTCTCTATCTGTCACC	3'	Diff	gp2a	((.((.((((((((((((((((((((.((((((....(((..(((((........)))))..))))))))).))))))))))))).))))))).)).))	99	47.5	-51.8	1.1	0	0	0	0	33	32	0	0	0	14	33	46	0	0	0	0	23.2852	42.7384	0	0	0	7.65765	11.3033	52.5141	middle
12	14	osa-miR156a_L+1R-1	CTGACAGAAGAGAGTGAGCA	20	chr3	+	298929489	298929592	tttgggCTGACAGAAGAGAGTGAGCAcacagcggtaaatactgcatcatgatgagagaatgcctgtttctgctgtgtgctcactgctcttctcgtcagctctct	58	osa-MIR156c,osa-MIR156g,osa-MIR156f,osa-MIR156h,osa-MIR156b,bdi-MIR156f,bdi-MIR156e,bdi-MIR156b,bdi-MIR156i,sbi-MIR156i,sbi-MIR156f,zma-MIR156f,zma-MIR156c,zma-MIR156a,zma-MIR156g,tae-MIR156,ata-MIR156a,ata-MIR156e,ata-MIR156b,hvu-MIR156b,hvu-MIR156a,vca-MIR156a,sof-MIR156,ssp-MIR156,gma-MIR156a,gma-MIR156u,ptc-MIR156a,ptc-MIR156f,ptc-MIR156e,ptc-MIR156c,ath-MIR156b,ath-MIR156c,bra-MIR156c,ath-MI…	osa-MIR156b	ttgtcttgagaggggaagagatctctatgggttttggaggtcTGACAGAAGAGAGTGAGCACacacggtgctttcttagcatgcaagagccatgctgggagctgtgcgtGCTCACTCTCTATCTGTCAGCcgttcaccatgcccaatatgattaatctccttctctcagttgacag	osa-miR156a	TGACAGAAGAGAGTGAGCAC	5'	Diff	gp2a	...(((((((((((((((((((((((((((((((.(((((..(((((.........).)))).))))))))))))))))))))).))))))).))))))))...	98	49	-60	1.2	3.5	0	0	0	8	0	0	13	0	0	0	7.5	1.317	0	0	0	5.6449	0	0	7.93069	0	0	0	8.56207	low
13	15	osa-miR156a_L+1R-2	CTGACAGAAGAGAGTGAGC	19	chr8	+	183854899	183855011	gctgCTGACAGAAGAGAGTGAGCacacagcggcactggtagcgtcgaatttaactgaatatatactctactttccatttccgttgcgtgctcacttgtcttcctgtcagcttg	54	osa-MIR156b,osa-MIR156c,osa-MIR156g,bdi-MIR156e,bdi-MIR156i,bdi-MIR156f,sbi-MIR156i,sbi-MIR156f,zma-MIR156g,zma-MIR156c,zma-MIR156f,zma-MIR156a,tae-MIR156,ata-MIR156b,ata-MIR156a,ata-MIR156e,hvu-MIR156b,vca-MIR156a,sof-MIR156,ssp-MIR156,gma-MIR156a,gma-MIR156u,ptc-MIR156c,ptc-MIR156e,ptc-MIR156a,ptc-MIR156f,ath-MIR156b,ath-MIR156a,ath-MIR156c,bra-MIR156c,stu-MIR156f,aly-MIR156b,aly-MIR156c,aly-MI…	osa-MIR156g	ggcTGACAGAAGAGAGTGAGCACacagcgggcagactgcatctgaattacctgttgcgacgaagaagacgacggacgcagcttgccgttgcgtGCTCACTTCTCTCTCTGTCAGCt	osa-miR156a	TGACAGAAGAGAGTGAGCAC	5'	Diff	gp2a	...((((((((((((((((((((((.((((((....(((((.((...((((....))))....)).)))))........)))))).)))))))))).))))).)))))))...	107	47.8	-48.9	0.9	0	0	0	0	2.5	0	0	6	0	0	0	2.5	0	0	0	0	1.76403	0	0	3.66032	0	0	0	2.85402	low
14	16	csi-miR159b-5p_1ss1AT	TGCTGCCGACTCATTCATTCA	21	chr1	-	461603301	461603484	gagtttccttcagtccactcatggatggcattggattctgaattAGCTGCCGACTCATTCATTCAaacacttagtacggacattaatacagatgggcatgagtttaaacggagatcgatcgaccggatagtagctactcagtgaatgAGTGAATGATGCGGGAGCCAAttccatcctttccact	24	osa-MIR319b,osa-MIR159c,bdi-MIR159a,sbi-MIR319a,zma-MIR319b,mtr-MIR159b,gma-MIR159b,gma-MIR159f,ptc-MIR319c,ptc-MIR319d,ptc-MIR319g,ptc-MIR319f,ath-MIR159c,mdm-MIR319e,mdm-MIR319f,mdm-MIR319g,aly-MIR159c,vvi-MIR319f,nta-MIR319b,csi-MIR159b,lus-MIR159b,cme-MIR319a,cas-MIR159a,cca-MIR319,	csi-MIR159b	agtccactcatggatgaggcaagggtttggattAGCTGCCGACTCATTCATTCAaacacagtagaaagaggagcattttggttatcctattgtgaatgtgtgaatgaagcgggagataatattcatcctttcttttctgtgcttggactg	csi-miR159b-5p	AGCTGCCGACTCATTCATTCA	5'	Diff	gp2a	............(((((....)))))((....((((...(((((.(((.(((..(((((((((((..((((.((((...((...........(..((....))..)..(((.((....))..)))....))...)))).))))..)))))))))))..))).))).))))).))))...))...	155	44.6	-51.1	0.6	18	0	0	9	244	10	14	33	0	206	287	19	6.77316	0	0	40.7033	172.169	13.3557	9.58937	20.1318	0	112.677	98.3044	21.6906	middle
14	17	csi-miR159b-3p_1ss1AT	AGTGAATGATGCGGGAGCCAA	21	chr1	-	461603301	461603484	gagtttccttcagtccactcatggatggcattggattctgaattAGCTGCCGACTCATTCATTCAaacacttagtacggacattaatacagatgggcatgagtttaaacggagatcgatcgaccggatagtagctactcagtgaatgAGTGAATGATGCGGGAGCCAAttccatcctttccact	24	osa-MIR319b,osa-MIR159c,bdi-MIR159a,sbi-MIR319a,zma-MIR319b,mtr-MIR159b,gma-MIR159b,gma-MIR159f,ptc-MIR319c,ptc-MIR319d,ptc-MIR319g,ptc-MIR319f,ath-MIR159c,mdm-MIR319e,mdm-MIR319f,mdm-MIR319g,aly-MIR159c,vvi-MIR319f,nta-MIR319b,csi-MIR159b,lus-MIR159b,cme-MIR319a,cas-MIR159a,cca-MIR319,					3'	Diff	gp2a	............(((((....)))))((....((((...(((((.(((.(((..(((((((((((..((((.((((...((...........(..((....))..)..(((.((....))..)))....))...)))).))))..)))))))))))..))).))).))))).))))...))...	155	44.6	-51.1	0.6	0	0	0	0	5	0	0	0	0	16	64	0	0	0	0	0	3.52806	0	0	0	0	8.7516	21.9215	0	middle
15	18	aof-miR159_1ss1TG	GTTGGATTGAAGGGAGCTCTA	21	chr4	+	42264657	42264771	aGTTGGATTGAAGGAAGCTCTAccatattcagtaaatgtatttgcacagtaaatgtatttgcaggaagctctacatattaagtcctatccgagggtaaatcatttcaatccaaac	29	aof-MIR159,osa-MIR159f,vca-MIR159,mtr-MIR159a,gma-MIR159e,gma-MIR159a,ptc-MIR159b,ptc-MIR159a,ath-MIR159a,mdm-MIR159d,mdm-MIR159e,mdm-MIR159f,aly-MIR159a,ppe-MIR159,mes-MIR159a,mes-MIR159b,vvi-MIR159c,nta-MIR159,csi-MIR159a,cme-MIR159a,sly-MIR159,bra-MIR159a,bna-MIR159,cpa-MIR159a,rco-MIR159,hbr-MIR159a,ahy-MIR159,htu-MIR159a,pvu-MIR159a,	aof-MIR159	cataaaattgtaggttttaagagtggagctccttgaagtccaaatatgggtattggaggggtggatcgagctgctttgtcatggattccactgccctattcctatatgttattttcatcttgagagaaaaaaaaaggagggggggagaaagaaaaagatcatgttcatgggataggtttgtggcttgcatgactcaggagcttcattaacctcttcttacccttcTTTGGATTGAAGGGAGCTCTAcacgttaatctttctaattttttct	aof-miR159	TTTGGATTGAAGGGAGCTCTA	5'	Diff	gp2a	..(((((((((((((.(((((..........((((((..((((((...))))))..)))))).(((((..((........))..)).))).)))))...)).)))))))))))..	111	35.7	-29.9	0.7	85	5	49	0	18	7	38	52	0	43	110	0	31.9844	11.8299	46.9379	0	12.701	9.34902	26.0283	31.7228	0	23.5199	37.6777	0	middle
16	19	zma-MIR159e-p5_2ss11CG17CT	GCGGCGACGGGGGCGGTC	18	unanchor1	+	568128	568279	gccctttgttcacaccgcccgtcgctcctaccgattgaatggtccggtgaagtgttcggatcGCGGCGACGGGGGCGGTCcgccgcccgcgacgtcgcgagaagtccactgaaccttatcatttagaggaaggagaagtcgtaacaaggttt	1	zma-MIR159e,	zma-MIR159e	gCAGCTCCTGCAGCATCTGTTCgaggctcgccgcgttctgatgatccggcagcgcaagtccggcggcgacggcggcggccgaggtcggcggcgccggctggccgtATTGGTTTGAAGGGAGCTCCAc	zma-MIR159e-p5	gcggcgacggcggcggcc	5'	New	gp2a	...(((((((.((((.........(((((.((..(((((((((..(((..((((......((((((((.((.((((((....)))))).)).))))))))......))))..)))..))))))))).)).)))))..)).)))))))))...	146	59.2	-65.4	0.7	2.5	0	0	8	8.5	0	0	0	0	6	13	0	0.940716	0	0	36.1807	5.9977	0	0	0	0	3.28185	4.45281	0	middle
17	19	zma-MIR159e-p5_2ss11CG17CT	GCGGCGACGGGGGCGGTC	18	unanchor1	+	644783	644897	tcgctcctaccgattgaatggtccggtgaagtgttcggaGCGGCGACGGGGGCGGTCcgccgcccgcgacgtcgcgagaagtccactgaaccttatcatttagaggaaggagaag	1	zma-MIR159e,	zma-MIR159e	gCAGCTCCTGCAGCATCTGTTCgaggctcgccgcgttctgatgatccggcagcgcaagtccggcggcgacggcggcggccgaggtcggcggcgccggctggccgtATTGGTTTGAAGGGAGCTCCAc	zma-MIR159e-p5	gcggcgacggcggcggcc	5'	New	gp2a	...(((((.((..(((((((((..(((..(((((((...((((((.((.((((((....)))))).)).))))))..)))...))))..)))..))))))))).)).)))))...	109	60.9	-58.2	0.8	2.5	0	0	8	8.5	0	0	0	0	6	13	0	0.940716	0	0	36.1807	5.9977	0	0	0	0	3.28185	4.45281	0	middle
18	20	aof-miR160c	TGCCTGGCTCCCTGTATGCCA	21	chr11	+	96994449	96994606	atgaataaatcagggaaggtgaaaaaggtagctagcgtttgTGCCTGGCTCCCTGTATGCCAcacatatagaattaatctacactcttaaggttggctattatgggtgGCGTGCGAGGAGCCAAGCATAgtctctgtctccctctttgatttgttgga	99	aof-MIR160c,osa-MIR160b,osa-MIR160d,osa-MIR160a,osa-MIR160c,bdi-MIR160b,bdi-MIR160a,bdi-MIR160d,bdi-MIR160c,sbi-MIR160d,sbi-MIR160c,sbi-MIR160b,sbi-MIR160a,sbi-MIR160e,zma-MIR160a,zma-MIR160g,zma-MIR160e,zma-MIR160b,zma-MIR160d,zma-MIR160c,tae-MIR160,ata-MIR160c,ata-MIR160a,ata-MIR160b,far-MIR160,ttu-MIR160,mtr-MIR160b,mtr-MIR160e,mtr-MIR160d,mtr-MIR160a,gma-MIR160a,gma-MIR160c,gma-MIR160e,gma-MI…	aof-MIR160c	ttcatgagaaTGCCTGGCTCCCTGTATGCCAcacgtgtgcactaattcttgctgcttgaatttggttactgcgggtggcgtgcgaggagccaagcattcagtaccc	aof-miR160c	TGCCTGGCTCCCTGTATGCCA	5'	Yes	gp2a	...(((((((((..((.((.((...(((..........((((((.(((((((..(((((((((.(((((((...((((((.........)))))).))).)))).)))))))))..))))))).)))))))))...)).)).))..)))))))))...	152	44.9	-59.9	0.8	79	0	49	20	197	71	40	41	0	56	341	29	29.7266	0	46.9379	90.4517	139.006	94.8257	27.3982	25.0122	0	30.6306	116.801	33.1067	middle
18	21	osa-miR160a-3p_2ss7AG21GA	GCGTGCGAGGAGCCAAGCATA	21	chr11	+	96994449	96994606	atgaataaatcagggaaggtgaaaaaggtagctagcgtttgTGCCTGGCTCCCTGTATGCCAcacatatagaattaatctacactcttaaggttggctattatgggtgGCGTGCGAGGAGCCAAGCATAgtctctgtctccctctttgatttgttgga	99	aof-MIR160c,osa-MIR160b,osa-MIR160d,osa-MIR160a,osa-MIR160c,bdi-MIR160b,bdi-MIR160a,bdi-MIR160d,bdi-MIR160c,sbi-MIR160d,sbi-MIR160c,sbi-MIR160b,sbi-MIR160a,sbi-MIR160e,zma-MIR160a,zma-MIR160g,zma-MIR160e,zma-MIR160b,zma-MIR160d,zma-MIR160c,tae-MIR160,ata-MIR160c,ata-MIR160a,ata-MIR160b,far-MIR160,ttu-MIR160,mtr-MIR160b,mtr-MIR160e,mtr-MIR160d,mtr-MIR160a,gma-MIR160a,gma-MIR160c,gma-MIR160e,gma-MI…	osa-MIR160a	gtgTGCCTGGCTCCCTGTATGCCAcacatgtagaccaacccatggtgtctggttgcctactgggtgGCGTGCAAGGAGCCAAGCATGc	osa-miR160a-3p	GCGTGCAAGGAGCCAAGCATG	3'	Diff	gp2a	...(((((((((..((.((.((...(((..........((((((.(((((((..(((((((((.(((((((...((((((.........)))))).))).)))).)))))))))..))))))).)))))))))...)).)).))..)))))))))...	152	44.9	-59.9	0.8	32	0	20	0	0	0	8	8	0	14	141	0	12.0412	0	19.1583	0	0	0	5.47964	4.88043	0	7.65765	48.2959	0	middle
19	22	aof-miR160b	TGCCTGGTTCCCTGTATGCCA	21	chr4	-	44081688	44081779	tgagtcTGCCTGGTTCCCTGTATGCCAtcttagaagcataccaaaaaatttggtgttcttcctagttggcatagggaaatcaagcagacata	1	aof-MIR160b,	aof-MIR160b	gggatcgatgTGCCTGGTTCCCTGTATGCCAcccaggtacccccaatctcatgctgcctaggttgggtattttgggtggcgtgcatggaatcaagcatgtcttaattaatttgcctttgatctcc	aof-miR160b	TGCCTGGTTCCCTGTATGCCA	5'	Yes	gp2a	...((((((.(((((((((..((((((.((..((((.((((((((...)))))))).))))..)).)))))))))))).))).))))))...	86	42.4	-44.1	1.1	49	0	46	68	647	287	26	31	0	297	1426	63	18.438	0	44.0641	307.536	456.531	383.31	17.8088	18.9117	0	162.452	488.439	71.9214	middle
20	23	ptc-miR160h	TGCCTGGCTCCCTGCATGCCA	21	chr6	+	174056979	174057124	ccagaagttttgaagtggcattgagtcTGCCTGGCTCCCTGCATGCCAtctgagaagcataccaaaaaagttgttcttactagttggtatcagggaagtcaagcagacatgtacatcacactgtcattttacacttaaatttcaac	3	mtr-MIR160f,ptc-MIR160h,nta-MIR160d,	ptc-MIR160h	gatccctgtgTGCCTGGCTCCCTGCATGCCAtttgcatagctcatcagaacgtcggtggccttggtggatggcgtgcaacgagtcatgcatgctgtga	ptc-miR160h	TGCCTGGCTCCCTGCATGCCA	5'	Yes	gp2a	...(((((((((((((((((.((.((((((.((((((((((.((((((.(((..(((.(((..........))).)))..))).))))))))))).))))).))))))..(.....).)).)))))))))).....)))))))...	140	41.8	-49.2	0.8	5	0	0	0	7	0	0	0	0	0	11	0	1.88143	0	0	0	4.93928	0	0	0	0	0	3.76777	0	low
21	24	aof-miR160b_L+1R-1	GTGCCTGGTTCCCTGTATGCC	21	chr6	-	727400	727500	aatgggttGTGCCTGGCTCCCTGTATGCCacacgtatagacctaatctgttctatagcttggctattatgggtggcgtgcggggagccaagcataccctct	1	aof-MIR160b,	aof-MIR160b	gggatcgatgTGCCTGGTTCCCTGTATGCCAcccaggtacccccaatctcatgctgcctaggttgggtattttgggtggcgtgcatggaatcaagcatgtcttaattaatttgcctttgatctcc	aof-miR160b	TGCCTGGTTCCCTGTATGCCA	5'	Diff	gp2a	...(((.(((((.((((((((((((((((((.(((((((.((.((.((((...)))).))))))).)))).)))))))))))))))))).))))))))...	95	52.5	-57.4	1.1	0	0	0	0	0	0	0	0	0	12	17	0	0	0	0	0	0	0	0	0	0	6.5637	5.82291	0	low
22	25	osa-miR162a	TCGATAAACCTCTGCATCCAG	21	chr4	+	96511363	96511526	tcttaaatttttggttgaaattttggtgaagagtttctggaggcagcggcttatcgatcggttgctggccttgttgttgtatttcttacaatgcgggaattggTCGATAAACCTCTGCATCCAGctctcactcttttcattgaatttaaacatggaatttatat	36	osa-MIR162a,osa-MIR162b,bdi-MIR162,sbi-MIR162,zma-MIR162,mtr-MIR162,gma-MIR162a,gma-MIR162c,gma-MIR162b,ptc-MIR162a,ptc-MIR162b,ath-MIR162b,ath-MIR162a,mdm-MIR162a,mdm-MIR162b,stu-MIR162b,stu-MIR162a,aly-MIR162a,aly-MIR162b,ppe-MIR162,mes-MIR162,vvi-MIR162,nta-MIR162b,nta-MIR162a,csi-MIR162,lus-MIR162a,lus-MIR162b,cme-MIR162,sly-MIR162,bra-MIR162,cas-MIR162a,cpa-MIR162a,ghr-MIR162a,rco-MIR162,vun…	osa-MIR162a	ggtgatgcctgggcgcagtggtttatcgatcccttccctgccttgtggcgctgatccaggagcggcgaatttctttgagagggtgttctttttttttcttccttttggtccttgttgcagccaacgacaacgcgggaatcgaTCGATAAACCTCTGCATCCAGttctcgcc	osa-miR162a	TCGATAAACCTCTGCATCCAG	3'	Yes	gp2a	...(((((((...(((.....((..(((((((((..(((((.((((.((.(((((((((..((.(((.(......((((((.....)))))))))).))..))))))))).)).)))).))))).....)))))..))))..))....)))...)))))))...	158	38.4	-53.1	0.8	2521	283.5	605.5	129.5	897.5	268	860	1147.5	121	1726	2486	1631	948.618	670.757	580.018	585.675	633.287	357.934	589.061	700.036	589.106	944.079	851.515	1861.97	high
23	25	osa-miR162a	TCGATAAACCTCTGCATCCAG	21	chr5	+	98886708	98886836	aattttggtgaagaaattctggaggcagcggcttatcgatcgcttgctggccttgttgttgtatttcttacaatgcgggaatcggTCGATAAACCTCTGCATCCAGcactcactcttgtcattgaattt	36	osa-MIR162a,osa-MIR162b,bdi-MIR162,sbi-MIR162,zma-MIR162,mtr-MIR162,gma-MIR162a,gma-MIR162c,gma-MIR162b,ptc-MIR162a,ptc-MIR162b,ath-MIR162a,ath-MIR162b,mdm-MIR162a,mdm-MIR162b,stu-MIR162b,stu-MIR162a,aly-MIR162a,aly-MIR162b,ppe-MIR162,mes-MIR162,vvi-MIR162,nta-MIR162b,nta-MIR162a,csi-MIR162,lus-MIR162a,lus-MIR162b,cme-MIR162,sly-MIR162,bra-MIR162,cas-MIR162a,cpa-MIR162a,ghr-MIR162a,rco-MIR162,vun…	osa-MIR162a	ggtgatgcctgggcgcagtggtttatcgatcccttccctgccttgtggcgctgatccaggagcggcgaatttctttgagagggtgttctttttttttcttccttttggtccttgttgcagccaacgacaacgcgggaatcgaTCGATAAACCTCTGCATCCAGttctcgcc	osa-miR162a	TCGATAAACCTCTGCATCCAG	3'	Yes	gp2a	...((..(((((((....(((((.((((.((.((((((((((.((.(((.(......((((((.....)))))))))).)).)))))))))).)).)))).))))).......)))..))))..))...	123	44.2	-42.7	0.7	2521	283.5	605.5	129.5	897.5	268	860	1147.5	121	1726	2486	1631	948.618	670.757	580.018	585.675	633.287	357.934	589.061	700.036	589.106	944.079	851.515	1861.97	high
24	26	aof-miR164_1ss20CT	TGGAGAAGCAGGGCACGTGTA	21	chr1	-	212773985	212774100	aaaaggtgggttgtgcaggaTGGAGAAGCAGGGCACGTGTAttactatcttcgtatggttaagttggatagttcttCATGTGCCCATCTTCTCCATCatgcacaatcctacctaag	85	aof-MIR164,osa-MIR164e,osa-MIR164f,osa-MIR164a,osa-MIR164b,bdi-MIR164a,bdi-MIR164e,bdi-MIR164b,sbi-MIR164a,sbi-MIR164e,sbi-MIR164d,zma-MIR164h,zma-MIR164d,zma-MIR164b,zma-MIR164a,zma-MIR164g,zma-MIR164c,tae-MIR164,ata-MIR164c,ata-MIR164b,mtr-MIR164a,mtr-MIR164c,mtr-MIR164b,gma-MIR164i,gma-MIR164e,gma-MIR164b,gma-MIR164d,gma-MIR164h,gma-MIR164c,gma-MIR164k,gma-MIR164j,gma-MIR164g,gma-MIR164f,gma-M…	aof-MIR164	gcattgagaggtggcttgtggaggaTGGAGAAGCAGGGCACGTGCAttaccatctaacgcacgtgagtacttagttggatagttcttcatgtgctcatcttctccatcatgcacatcctacctaaagtttcaa	aof-miR164	TGGAGAAGCAGGGCACGTGCA	5'	Diff	gp2a	...((((((((((((((.((((((((((..(((((((((....(((((((...((....))....)))))))....)))))))))..)))))))))).))))))).)))))))...	110	44.8	-64.9	1.2	646.5	31.5	298.5	3.5	18.5	26	285	121.5	3.5	40.5	56	0	243.269	74.5286	285.938	15.8291	13.0538	34.7249	195.212	74.1215	17.0403	22.1525	19.1813	0	middle
24	27	bdi-miR164a-3p_2ss10TA20CT	CATGTGCCCATCTTCTCCATC	21	chr1	-	212773985	212774100	aaaaggtgggttgtgcaggaTGGAGAAGCAGGGCACGTGTAttactatcttcgtatggttaagttggatagttcttCATGTGCCCATCTTCTCCATCatgcacaatcctacctaag	85	aof-MIR164,osa-MIR164e,osa-MIR164f,osa-MIR164a,osa-MIR164b,bdi-MIR164a,bdi-MIR164e,bdi-MIR164b,sbi-MIR164a,sbi-MIR164e,sbi-MIR164d,zma-MIR164h,zma-MIR164d,zma-MIR164b,zma-MIR164a,zma-MIR164g,zma-MIR164c,tae-MIR164,ata-MIR164c,ata-MIR164b,mtr-MIR164a,mtr-MIR164c,mtr-MIR164b,gma-MIR164i,gma-MIR164e,gma-MIR164b,gma-MIR164d,gma-MIR164h,gma-MIR164c,gma-MIR164k,gma-MIR164j,gma-MIR164g,gma-MIR164f,gma-M…	bdi-MIR164a	gagtggacatatgaggcgaggcgcgcgaggTGGAGAAGCAGGGCACGTGCAttcgttccagctcgccgccggtgtgccgcgccgcggcctgggcgcgcgtgtcgcccgagcggccggccatgcgcgtgtgtgtgcatgCATGTGCCCTTCTTCTCCACCgcgcaagcctcgcctgcgaacgcgcgcgcacgcc	bdi-miR164a-3p	CATGTGCCCTTCTTCTCCACC	3'	Diff	gp2a	...((((((((((((((.((((((((((..(((((((((....(((((((...((....))....)))))))....)))))))))..)))))))))).))))))).)))))))...	110	44.8	-64.9	1.2	25	0	8	5	27	12	18	12	0	51	80	14	9.40716	0	7.66333	22.6129	19.0515	16.0269	12.3292	7.32064	0	27.8957	27.4019	15.9825	middle
25	28	osa-miR164c	TGGAGAAGCAGGGTACGTGCA	21	chr10	+	112944819	112944939	tttgagcttaattggtgagcagtcccctgtTGGAGAAGCAGGGTACGTGCAaagcctctacactctctccaactttgCACGTGCTCCCCTTCTCCAACatgggcttctctcctagcttcat	24	osa-MIR164c,mtr-MIR164a,gma-MIR164a,gma-MIR164g,gma-MIR164k,gma-MIR164b,gma-MIR164d,gma-MIR164e,ptc-MIR164c,mdm-MIR164d,ppe-MIR164c,ppe-MIR164b,mes-MIR164c,mes-MIR164b,mes-MIR164a,vvi-MIR164d,vvi-MIR164a,lus-MIR164d,lus-MIR164e,cme-MIR164c,cpa-MIR164a,cpa-MIR164c,rco-MIR164b,cca-MIR164,	osa-MIR164c	aggttcttgtTGGAGAAGCAGGGTACGTGCAaaatgcacaccggttggtcgagctaattaacaagctctgacgaccatggtgatcgaatgcacgtgctccccttctccaccatggcctt	osa-miR164c	TGGAGAAGCAGGGTACGTGCA	5'	Yes	gp2a	...(((((.....((.(((.((.(((.(((((((((((..((((((((((((((..................))))))))))))))..))))))))))).))))).))).)).)))))...	115	51.2	-57.3	0.9	6.5	0	4.5	3	56	25	0	0	0	37.5	83	0	2.44586	0	4.31062	13.5678	39.5143	33.3893	0	0	0	20.5116	28.4295	0	middle
25	29	mtr-MIR164a-p3	CACGTGCTCCCCTTCTCCAAC	21	chr10	+	112944819	112944939	tttgagcttaattggtgagcagtcccctgtTGGAGAAGCAGGGTACGTGCAaagcctctacactctctccaactttgCACGTGCTCCCCTTCTCCAACatgggcttctctcctagcttcat	24	osa-MIR164c,mtr-MIR164a,gma-MIR164a,gma-MIR164g,gma-MIR164k,gma-MIR164b,gma-MIR164d,gma-MIR164e,ptc-MIR164c,mdm-MIR164d,ppe-MIR164c,ppe-MIR164b,mes-MIR164c,mes-MIR164b,mes-MIR164a,vvi-MIR164d,vvi-MIR164a,lus-MIR164d,lus-MIR164e,cme-MIR164c,cpa-MIR164a,cpa-MIR164c,rco-MIR164b,cca-MIR164,	mtr-MIR164a	cttgtTGGAGAAGCAGGGCACGTGCAaatcctctttctgattcattctctcataatgcatatcaatatcttttgcacgtgctccccttctccaactagg	mtr-MIR164a-p3	cacgtgctccccttctccaac	3'	New	gp2a	...(((((.....((.(((.((.(((.(((((((((((..((((((((((((((..................))))))))))))))..))))))))))).))))).))).)).)))))...	115	51.2	-57.3	0.9	0	0	9	0	0	3	0	0	0	11	14.5	0	0	0	8.62124	0	0	4.00672	0	0	0	6.01673	4.9666	0	low
26	28	osa-miR164c	TGGAGAAGCAGGGTACGTGCA	21	unanchor664	-	255694	255814	tttgagcttaattggtgagcagtcccctgtTGGAGAAGCAGGGTACGTGCAaagcctctacactctctccaactttgCACGTGCTCCCCTTCTCCAACatgggcttctctcctagcttcat	49	osa-MIR164c,bdi-MIR164e,mtr-MIR164a,mtr-MIR164b,mtr-MIR164c,gma-MIR164k,gma-MIR164a,gma-MIR164g,gma-MIR164e,gma-MIR164d,gma-MIR164b,gma-MIR164j,gma-MIR164f,gma-MIR164i,gma-MIR164h,gma-MIR164c,ptc-MIR164c,ptc-MIR164d,ptc-MIR164a,ath-MIR164a,mdm-MIR164d,mdm-MIR164b,mdm-MIR164c,aly-MIR164a,ppe-MIR164c,ppe-MIR164b,mes-MIR164c,mes-MIR164a,mes-MIR164b,vvi-MIR164a,vvi-MIR164d,csi-MIR164c,csi-MIR164b,csi…	osa-MIR164c	aggttcttgtTGGAGAAGCAGGGTACGTGCAaaatgcacaccggttggtcgagctaattaacaagctctgacgaccatggtgatcgaatgcacgtgctccccttctccaccatggcctt	osa-miR164c	TGGAGAAGCAGGGTACGTGCA	5'	Yes	gp2a	...(((((.....((.(((.((.(((.(((((((((((..((((((((((((((..................))))))))))))))..))))))))))).))))).))).)).)))))...	115	51.2	-57.3	0.9	6.5	0	4.5	3	56	25	0	0	0	37.5	83	0	2.44586	0	4.31062	13.5678	39.5143	33.3893	0	0	0	20.5116	28.4295	0	middle
26	30	aly-miR164a-3p_1ss6AG	CACGTGCTCCCCTTCTCCAAC	21	unanchor664	-	255694	255814	tttgagcttaattggtgagcagtcccctgtTGGAGAAGCAGGGTACGTGCAaagcctctacactctctccaactttgCACGTGCTCCCCTTCTCCAACatgggcttctctcctagcttcat	49	osa-MIR164c,bdi-MIR164e,mtr-MIR164a,mtr-MIR164b,mtr-MIR164c,gma-MIR164k,gma-MIR164a,gma-MIR164g,gma-MIR164e,gma-MIR164d,gma-MIR164b,gma-MIR164j,gma-MIR164f,gma-MIR164i,gma-MIR164h,gma-MIR164c,ptc-MIR164c,ptc-MIR164d,ptc-MIR164a,ath-MIR164a,mdm-MIR164d,mdm-MIR164b,mdm-MIR164c,aly-MIR164a,ppe-MIR164c,ppe-MIR164b,mes-MIR164c,mes-MIR164a,mes-MIR164b,vvi-MIR164a,vvi-MIR164d,csi-MIR164c,csi-MIR164b,csi…	aly-MIR164a	gtTGGAGAAGCAGGGCACGTGCAaaccaacaaacacgaaatccgtctcatgtgttttgCACGTACTCCCCTTCTCCAAC	aly-miR164a-3p	CACGTACTCCCCTTCTCCAAC	3'	Diff	gp2a	...(((((.....((.(((.((.(((.(((((((((((..((((((((((((((..................))))))))))))))..))))))))))).))))).))).)).)))))...	115	51.2	-57.3	0.9	0	0	9	0	0	3	0	0	0	11	14.5	0	0	0	8.62124	0	0	4.00672	0	0	0	6.01673	4.9666	0	low
27	31	aof-miR164_R-2	TGGAGAAGCAGGGCACGTG	19	chr1	+	453182984	453183103	caaaggtgaggaaggccttgaTGGAGAAGCAGGGCACGTGcacgcgcacgcgcacggtcgctcgcttgcttacatgtgctgcacgtgctttgtttctccaccatggcttcctcacctacc	99	aof-MIR164,osa-MIR164e,osa-MIR164f,osa-MIR164d,osa-MIR164a,osa-MIR164b,bdi-MIR164c,bdi-MIR164a,bdi-MIR164e,bdi-MIR164b,sbi-MIR164a,sbi-MIR164e,sbi-MIR164d,sbi-MIR164b,zma-MIR164h,zma-MIR164d,zma-MIR164b,zma-MIR164g,zma-MIR164a,zma-MIR164c,zma-MIR164f,tae-MIR164,ata-MIR164c,ata-MIR164a,ata-MIR164b,mtr-MIR164a,mtr-MIR164c,mtr-MIR164b,gma-MIR164i,gma-MIR164b,gma-MIR164d,gma-MIR164e,gma-MIR164c,gma-M…	aof-MIR164	gcattgagaggtggcttgtggaggaTGGAGAAGCAGGGCACGTGCAttaccatctaacgcacgtgagtacttagttggatagttcttcatgtgctcatcttctccatcatgcacatcctacctaaagtttcaa	aof-miR164	TGGAGAAGCAGGGCACGTGCA	5'	Diff	gp2a	...(((((((((((.((.((.((((((((((..(((((((((.(((((...(((.(((.....)))))).....))))))))))))))..)))))))))).)).)))))))))))))...	114	59.2	-71.7	1	24	0	11.5	0	13	29	17	13.5	0	3	11.5	0	9.03088	0	11.016	0	9.17296	38.7316	11.6442	8.23572	0	1.64093	3.93903	0	middle
28	32	aof-miR164_1ss20CA	TGGAGAAGCAGGGCACGTGAA	21	chr1	-	453895809	453895928	caaaggtgaggaaggccttgaTGGAGAAGCAGGGCACGTGCAcgcgcacgcgcacggtcgctcgcttgcttacatgcgctgcacgtgctttgtttctccaccatggcttcctcacctacc	102	aof-MIR164,osa-MIR164b,osa-MIR164a,osa-MIR164f,osa-MIR164d,osa-MIR164e,bdi-MIR164e,bdi-MIR164b,bdi-MIR164a,bdi-MIR164c,sbi-MIR164d,sbi-MIR164a,sbi-MIR164e,sbi-MIR164b,zma-MIR164b,zma-MIR164d,zma-MIR164c,zma-MIR164a,zma-MIR164g,zma-MIR164f,zma-MIR164h,tae-MIR164,ata-MIR164b,ata-MIR164c,ata-MIR164a,far-MIR164a,far-MIR164b,mtr-MIR164b,mtr-MIR164c,mtr-MIR164a,gma-MIR164j,gma-MIR164k,gma-MIR164a,gma-M…	aof-MIR164	gcattgagaggtggcttgtggaggaTGGAGAAGCAGGGCACGTGCAttaccatctaacgcacgtgagtacttagttggatagttcttcatgtgctcatcttctccatcatgcacatcctacctaaagtttcaa	aof-miR164	TGGAGAAGCAGGGCACGTGCA	5'	Diff	gp2a	...(((((((((((.((.((.((((((((((..(((((((((.(((((...(((.(((.....)))))).....))))))))))))))..)))))))))).)).)))))))))))))...	114	60	-73.6	1	4780	264.5	1489.5	17.5	221	167	1824	1082	23.5	138.5	128	0	1798.65	625.803	1426.82	79.1453	155.94	223.041	1249.36	660.078	114.413	75.7561	43.8431	0	high
29	33	aof-miR164	TGGAGAAGCAGGGCACGTGCA	21	chr2	+	7687725	7687866	agaaggtaagttgagcgaggTGGAGAAGCAGGGCACGTGCAttactatctaacatcttgcatctctctcagaaataaaatttgtttcggttagattgttcttcatgtgcccatcttttccaccatgaccaaccttacctaat	99	aof-MIR164,osa-MIR164b,osa-MIR164f,osa-MIR164a,osa-MIR164d,osa-MIR164e,bdi-MIR164b,bdi-MIR164e,bdi-MIR164a,bdi-MIR164c,sbi-MIR164d,sbi-MIR164e,sbi-MIR164a,sbi-MIR164b,zma-MIR164a,zma-MIR164g,zma-MIR164c,zma-MIR164d,zma-MIR164b,zma-MIR164f,zma-MIR164h,tae-MIR164,ata-MIR164b,ata-MIR164c,ata-MIR164a,mtr-MIR164b,mtr-MIR164a,mtr-MIR164c,gma-MIR164g,gma-MIR164f,gma-MIR164a,gma-MIR164k,gma-MIR164j,gma-M…	aof-MIR164	gcattgagaggtggcttgtggaggaTGGAGAAGCAGGGCACGTGCAttaccatctaacgcacgtgagtacttagttggatagttcttcatgtgctcatcttctccatcatgcacatcctacctaaagtttcaa	aof-miR164	TGGAGAAGCAGGGCACGTGCA	5'	Yes	gp2a	...((((((((((..(..((((((((((..(((((((((....((.(((((((.....(((....................)))....))))))).))....)))))))))..))))))))))..)..)))).))))))...	136	41.5	-54	0.9	4960	427	2413	121	1315	626.5	2902.5	3052.5	64	850.5	1259.5	35	1866.38	1010.28	2311.45	547.233	927.88	836.737	1988.08	1862.19	311.593	465.202	431.409	39.9563	high
30	33	aof-miR164	TGGAGAAGCAGGGCACGTGCA	21	chr2	+	19737682	19737789	caaaggtgagcaaggccttgaTGGAGAAGCAGGGCACGTGCAtggtcacatgcttgcttacatgcactgtgcgtgctttgtttctccaccatggcctcctcacctaac	97	aof-MIR164,osa-MIR164f,osa-MIR164a,osa-MIR164b,osa-MIR164d,bdi-MIR164a,bdi-MIR164e,bdi-MIR164b,bdi-MIR164c,sbi-MIR164a,sbi-MIR164e,sbi-MIR164d,sbi-MIR164b,zma-MIR164d,zma-MIR164b,zma-MIR164a,zma-MIR164g,zma-MIR164c,zma-MIR164f,tae-MIR164,ata-MIR164c,ata-MIR164b,ata-MIR164a,mtr-MIR164a,mtr-MIR164c,mtr-MIR164b,gma-MIR164i,gma-MIR164e,gma-MIR164b,gma-MIR164d,gma-MIR164c,gma-MIR164h,gma-MIR164k,gma-M…	aof-MIR164	gcattgagaggtggcttgtggaggaTGGAGAAGCAGGGCACGTGCAttaccatctaacgcacgtgagtacttagttggatagttcttcatgtgctcatcttctccatcatgcacatcctacctaaagtttcaa	aof-miR164	TGGAGAAGCAGGGCACGTGCA	5'	Yes	gp2a	...(((((((..(((((.((.((((((((((..(((((((((((....))))).(((......)))....))))))..)))))))))).)).))))).)))))))...	102	53.7	-60.7	1	4960	427	2413	121	1315	626.5	2902.5	3052.5	64	850.5	1259.5	35	1866.38	1010.28	2311.45	547.233	927.88	836.737	1988.08	1862.19	311.593	465.202	431.409	39.9563	high
31	34	osa-miR164d_1ss20CA	TGGAGAAGCAGGGCACGTGAT	21	chr6	-	8808623	8808725	agagtgagcaggccgagcTGGAGAAGCAGGGCACGTGTTttgctgcctaggtacggtggcagaaaagcatgtgcactccctctccagttcgggttctcaccct	7	osa-MIR164d,osa-MIR164e,bdi-MIR164c,sbi-MIR164b,zma-MIR164f,ata-MIR164a,cme-MIR164a,	osa-MIR164d	caaaccgtgcTGGAGAAGCAGGGCACGTGCTcgacggcggggctggctggccggccggcttgcagcatgtgcgctccttctccagcatggcttc	osa-miR164d	TGGAGAAGCAGGGCACGTGCT	5'	Diff	gp2a	((.(((((.(..((((((((((((.(..(((((((((((((.(((((..........))))).))))))))))).))..)))))))))))))..)))))).))	103	58.3	-54.3	0.9	10	0	0	0	0	0	0	0	0	0	0	2.5	3.76287	0	0	0	0	0	0	0	0	0	0	2.85402	low
32	35	aof-miR164_2ss20CT21AT	TGGAGAAGCAGGGCACGTGTT	21	chr9	+	230904093	230904180	aggccgagcTGGAGAAGCAGGGCACGTGTTttgctgcctaggtacggtgtggcagaaaagcatgtgcactccctctccagttcgggtt	99	aof-MIR164,osa-MIR164e,osa-MIR164f,osa-MIR164d,osa-MIR164a,osa-MIR164b,bdi-MIR164c,bdi-MIR164a,bdi-MIR164e,bdi-MIR164b,sbi-MIR164a,sbi-MIR164e,sbi-MIR164b,sbi-MIR164d,zma-MIR164h,zma-MIR164d,zma-MIR164b,zma-MIR164g,zma-MIR164a,zma-MIR164f,zma-MIR164c,tae-MIR164,ata-MIR164c,ata-MIR164a,ata-MIR164b,mtr-MIR164a,mtr-MIR164c,mtr-MIR164b,gma-MIR164i,gma-MIR164d,gma-MIR164b,gma-MIR164e,gma-MIR164h,gma-M…	aof-MIR164	gcattgagaggtggcttgtggaggaTGGAGAAGCAGGGCACGTGCAttaccatctaacgcacgtgagtacttagttggatagttcttcatgtgctcatcttctccatcatgcacatcctacctaaagtttcaa	aof-miR164	TGGAGAAGCAGGGCACGTGCA	5'	Diff	gp2a	...((((((((((((.(..(((((((((((((.(((((............))))).))))))))))).))..)))))))))))))...	82	58	-48.1	0.9	1451.5	91	576.5	34	170.5	124	681	268	11	505	360.5	22.5	546.18	215.305	552.238	153.768	120.307	165.611	466.454	163.494	53.5551	276.222	123.48	25.6862	high
33	36	ptc-MIR166e-p5_2ss19TA21TC	GATTGTCGTCTGGTTCGAAGC	21	chr10	+	226795655	226795772	gatagttgagggGATTGTCGTCTGGTTCGAAGCctttcagaagaaaagagaatccgtgaatcccaaaaccttttcgatgagaaagtttTCGGACCAGGCTTCATTCCccctaactctt	218	aof-MIR166a,aof-MIR166d,osa-MIR166c,osa-MIR166h,osa-MIR166a,osa-MIR166b,osa-MIR166j,osa-MIR166g,osa-MIR166d,osa-MIR166m,osa-MIR166f,bdi-MIR166b,bdi-MIR166c,bdi-MIR166i,bdi-MIR166a,bdi-MIR166j,bdi-MIR166e,bdi-MIR166d,bdi-MIR166f,sbi-MIR166b,sbi-MIR166c,sbi-MIR166i,sbi-MIR166f,sbi-MIR166h,sbi-MIR166d,sbi-MIR166k,sbi-MIR166a,sbi-MIR166j,zma-MIR166h,zma-MIR166i,zma-MIR166l,zma-MIR166b,zma-MIR166c,zma…	ptc-MIR166e	taactgttgaggggattgtcgtctggttcgatgtcattcatgagaagctcaaacataaacgtaatattgaatgattTCGGACCAGGCTTCATTCCCCccaacaatg	ptc-MIR166e-p5	gattgtcgtctggttcgatgt	5'	New	gp2a	...((((..(((((.((..((((((((((((..(((((....((((((.....................)))))).....)))))..))))))))))))..)).)))))..))))...	112	44.9	-45.2	0.9	72	3	6.5	0	3	0	58.5	63	3	13	12	3	27.0926	7.09796	6.22645	0	2.11684	0	40.0698	38.4334	14.6059	7.11068	4.11029	3.42483	middle
33	37	aof-miR166a_L-2	TCGGACCAGGCTTCATTCC	19	chr10	+	226795655	226795772	gatagttgagggGATTGTCGTCTGGTTCGAAGCctttcagaagaaaagagaatccgtgaatcccaaaaccttttcgatgagaaagtttTCGGACCAGGCTTCATTCCccctaactctt	218	aof-MIR166a,aof-MIR166d,osa-MIR166c,osa-MIR166h,osa-MIR166a,osa-MIR166b,osa-MIR166j,osa-MIR166g,osa-MIR166d,osa-MIR166m,osa-MIR166f,bdi-MIR166b,bdi-MIR166c,bdi-MIR166i,bdi-MIR166a,bdi-MIR166j,bdi-MIR166e,bdi-MIR166d,bdi-MIR166f,sbi-MIR166b,sbi-MIR166c,sbi-MIR166i,sbi-MIR166f,sbi-MIR166h,sbi-MIR166d,sbi-MIR166k,sbi-MIR166a,sbi-MIR166j,zma-MIR166h,zma-MIR166i,zma-MIR166l,zma-MIR166b,zma-MIR166c,zma…	aof-MIR166d	attaaaggaagctttctctttgaggggaatgttgtctggctcgaggccatcttttctgatccattaccctgatcatttctcttttcttttctattcatttatatcagattttaaaagatcaacaacccgtttctcaatttatattgtaaattaagactccatgagagagatcgaTCTCGGACCAGGCTTCATTCCcctcaatcacagcttccaaccccatct	aof-miR166a	TCTCGGACCAGGCTTCATTCC	3'	Diff	gp2a	...((((..(((((.((..((((((((((((..(((((....((((((.....................)))))).....)))))..))))))))))))..)).)))))..))))...	112	44.9	-45.2	0.9	310	17.5	84.5	22	84	100.5	208	326.5	4.5	142.5	125	201.5	116.649	41.4048	80.9439	99.4969	59.2714	134.225	142.471	199.182	21.9089	77.944	42.8155	230.034	middle
34	36	ptc-MIR166e-p5_2ss19TA21TC	GATTGTCGTCTGGTTCGAAGC	21	unanchor705	-	27532	27649	gatagttgagggGATTGTCGTCTGGTTCGAAGCctttcagaagaaaagagaatccgtgaatcccaaaaccttttcgatgagaaagtttTCGGACCAGGCTTCATTCCCCctaactctt	221	aof-MIR166d,aof-MIR166c,aof-MIR166a,osa-MIR166f,osa-MIR166d,osa-MIR166b,osa-MIR166j,osa-MIR166a,osa-MIR166c,osa-MIR166g,osa-MIR166h,bdi-MIR166d,bdi-MIR166e,bdi-MIR166a,bdi-MIR166b,bdi-MIR166c,bdi-MIR166i,bdi-MIR166f,sbi-MIR166j,sbi-MIR166a,sbi-MIR166d,sbi-MIR166h,sbi-MIR166i,sbi-MIR166b,sbi-MIR166c,sbi-MIR166k,sbi-MIR166f,sbi-MIR166g,zma-MIR166g,zma-MIR166d,zma-MIR166a,zma-MIR166e,zma-MIR166f,zma…	ptc-MIR166e	taactgttgaggggattgtcgtctggttcgatgtcattcatgagaagctcaaacataaacgtaatattgaatgattTCGGACCAGGCTTCATTCCCCccaacaatg	ptc-MIR166e-p5	gattgtcgtctggttcgatgt	5'	New	gp2a	...((((..(((((.((..((((((((((((..(((((....((((((.....................)))))).....)))))..))))))))))))..)).)))))..))))...	112	44.9	-45.2	0.9	72	3	6.5	0	3	0	58.5	63	3	13	12	3	27.0926	7.09796	6.22645	0	2.11684	0	40.0698	38.4334	14.6059	7.11068	4.11029	3.42483	middle
34	38	aof-miR166a_L-2R+2_1ss19TC	TCGGACCAGGCTTCATCCCCC	21	unanchor705	-	27532	27649	gatagttgagggGATTGTCGTCTGGTTCGAAGCctttcagaagaaaagagaatccgtgaatcccaaaaccttttcgatgagaaagtttTCGGACCAGGCTTCATTCCCCctaactctt	221	aof-MIR166d,aof-MIR166c,aof-MIR166a,osa-MIR166f,osa-MIR166d,osa-MIR166b,osa-MIR166j,osa-MIR166a,osa-MIR166c,osa-MIR166g,osa-MIR166h,bdi-MIR166d,bdi-MIR166e,bdi-MIR166a,bdi-MIR166b,bdi-MIR166c,bdi-MIR166i,bdi-MIR166f,sbi-MIR166j,sbi-MIR166a,sbi-MIR166d,sbi-MIR166h,sbi-MIR166i,sbi-MIR166b,sbi-MIR166c,sbi-MIR166k,sbi-MIR166f,sbi-MIR166g,zma-MIR166g,zma-MIR166d,zma-MIR166a,zma-MIR166e,zma-MIR166f,zma…	aof-MIR166a	gagaaaggaaagtttgggtgtttggaatgaagtttgatccaagatcttttaatattaatgatcctaatgagtggctaattaagagaTCTCGGACCAGGCTTCATTCCtcacaccttgctttttcattacaga	aof-miR166a	TCTCGGACCAGGCTTCATTCC	3'	Diff	gp2a	...((((..(((((.((..((((((((((((..(((((....((((((.....................)))))).....)))))..))))))))))))..)).)))))..))))...	112	44.9	-45.2	0.9	3556.5	78	453	51	1008.5	576	1490.5	4686.5	11	1745	619.5	74	1338.26	184.547	433.936	230.652	711.61	769.291	1020.92	2859.01	53.5551	954.472	212.194	84.4791	high
35	39	osa-miR166l-5p_2ss1GA18AG	AGATTGTTGTCTGGTTCGAGG	21	chr3	-	311310802	311310945	tcattcatgatagttgaggAGATTGTTGTCTGGTTCGAGGcctttcacatgaagagatcgatctctctcaaatgatattccctaagatcttcttcaaccagaacgtttTCGGACCAGGCTTCAATCCCCctaactcgtggaatc	184	aof-MIR166d,osa-MIR166l,osa-MIR166k,osa-MIR166c,osa-MIR166j,osa-MIR166b,osa-MIR166a,osa-MIR166f,osa-MIR166d,bdi-MIR166h,bdi-MIR166a,bdi-MIR166i,bdi-MIR166c,bdi-MIR166b,bdi-MIR166d,bdi-MIR166e,sbi-MIR166e,sbi-MIR166g,sbi-MIR166b,sbi-MIR166c,sbi-MIR166h,sbi-MIR166i,sbi-MIR166d,sbi-MIR166j,sbi-MIR166a,zma-MIR166n,zma-MIR166k,zma-MIR166j,zma-MIR166h,zma-MIR166b,zma-MIR166i,zma-MIR166a,zma-MIR166e,zma…	osa-MIR166l	gttaggttaaggGGATTGTTGTCTGGTTCAAGGtctccacattgtgcaaaatgttcattcatggaggcacaggatgcttggtgatcTCGGACCAGGCTTCAATCCCTttaaccagca	osa-miR166l-5p	GGATTGTTGTCTGGTTCAAGG	5'	Diff	gp2a	...(((((((..(((..((.(((((..((((((((((((....(((...((((((((((........((....))..........)))).))))))....)))....))))))))))))..))))).))..))))))))))...	138	43.8	-45.8	0.7	37	0	6	0	0	0	19	5	0	10	9	0	13.9226	0	5.7475	0	0	0	13.0141	3.05027	0	5.46975	3.08272	0	middle
35	40	aof-miR166a_L-2R+2_1ss18TA	TCGGACCAGGCTTCAATCCCC	21	chr3	-	311310802	311310945	tcattcatgatagttgaggAGATTGTTGTCTGGTTCGAGGcctttcacatgaagagatcgatctctctcaaatgatattccctaagatcttcttcaaccagaacgtttTCGGACCAGGCTTCAATCCCCctaactcgtggaatc	184	aof-MIR166d,osa-MIR166l,osa-MIR166k,osa-MIR166c,osa-MIR166j,osa-MIR166b,osa-MIR166a,osa-MIR166f,osa-MIR166d,bdi-MIR166h,bdi-MIR166a,bdi-MIR166i,bdi-MIR166c,bdi-MIR166b,bdi-MIR166d,bdi-MIR166e,sbi-MIR166e,sbi-MIR166g,sbi-MIR166b,sbi-MIR166c,sbi-MIR166h,sbi-MIR166i,sbi-MIR166d,sbi-MIR166j,sbi-MIR166a,zma-MIR166n,zma-MIR166k,zma-MIR166j,zma-MIR166h,zma-MIR166b,zma-MIR166i,zma-MIR166a,zma-MIR166e,zma…	aof-MIR166d	attaaaggaagctttctctttgaggggaatgttgtctggctcgaggccatcttttctgatccattaccctgatcatttctcttttcttttctattcatttatatcagattttaaaagatcaacaacccgtttctcaatttatattgtaaattaagactccatgagagagatcgaTCTCGGACCAGGCTTCATTCCcctcaatcacagcttccaaccccatct	aof-miR166a	TCTCGGACCAGGCTTCATTCC	3'	Diff	gp2a	...(((((((..(((..((.(((((..((((((((((((....(((...((((((((((........((....))..........)))).))))))....)))....))))))))))))..))))).))..))))))))))...	138	43.8	-45.8	0.7	146	12	18	0	60	14	86.5	105	0	133	36	9	54.9378	28.3918	17.2425	0	42.3367	18.698	59.2486	64.0556	0	72.7477	12.3309	10.2745	middle
36	41	osa-miR166b-5p_1ss19GT	GGAATGTTGTCTGGCTCGTGG	21	chr9	-	180201712	180201868	acgggaagctttctctgaggGGAATGTTGTCTGGCTCGGGGaagggaatctagtgcatgcttcattttttattattaaaaatgtcccttcggagaatgaaaatgatttttgtcgatcTCGGACCAGGCTTCATTCCCCccatttgcaagcttctatt	224	aof-MIR166a,aof-MIR166d,aof-MIR166c,aof-MIR166b,osa-MIR166f,osa-MIR166g,osa-MIR166j,osa-MIR166b,osa-MIR166a,osa-MIR166c,osa-MIR166m,osa-MIR166d,osa-MIR166i,osa-MIR166h,bdi-MIR166f,bdi-MIR166d,bdi-MIR166a,bdi-MIR166i,bdi-MIR166c,bdi-MIR166b,bdi-MIR166e,sbi-MIR166j,sbi-MIR166a,sbi-MIR166k,sbi-MIR166h,sbi-MIR166i,sbi-MIR166b,sbi-MIR166c,sbi-MIR166d,sbi-MIR166f,zma-MIR166g,zma-MIR166a,zma-MIR166d,zma…	osa-MIR166b	gggagccttttcattttgaggGGAATGTTGTCTGGCTCGGGGctacttttaatttctctctcttttgatatcttcttttctcgatctcctagcttgatcttttgatctctcaaatcgatcttaagaaaaagatcagtcaaagagatgagagtagatgtctgtagatcTCGGACCAGGCTTCATTCCCCccaaacagaagggctccc	osa-miR166b-5p	GGAATGTTGTCTGGCTCGGGG	5'	Diff	gp2a	...((((((((....((.((((((((..((((((..(((((((((((....(((....))).(((((((.......)))))))))))))).............(((....)))...))))..))))))..)))))))).)).....))))))))...	151	43.3	-56.2	0.8	719	20	157	0	16	6	481	687	5	86	40	47	270.55	47.3197	150.393	0	11.2898	8.01344	329.463	419.107	24.3432	47.0399	13.701	53.6557	middle
36	42	aof-miR166a_L-2R+2_1ss4CN	TNGGACCAGGCTTCATTCCCC	21	chr9	-	180201712	180201868	acgggaagctttctctgaggGGAATGTTGTCTGGCTCGGGGaagggaatctagtgcatgcttcattttttattattaaaaatgtcccttcggagaatgaaaatgatttttgtcgatcTCGGACCAGGCTTCATTCCCCccatttgcaagcttctatt	224	aof-MIR166a,aof-MIR166d,aof-MIR166c,aof-MIR166b,osa-MIR166f,osa-MIR166g,osa-MIR166j,osa-MIR166b,osa-MIR166a,osa-MIR166c,osa-MIR166m,osa-MIR166d,osa-MIR166i,osa-MIR166h,bdi-MIR166f,bdi-MIR166d,bdi-MIR166a,bdi-MIR166i,bdi-MIR166c,bdi-MIR166b,bdi-MIR166e,sbi-MIR166j,sbi-MIR166a,sbi-MIR166k,sbi-MIR166h,sbi-MIR166i,sbi-MIR166b,sbi-MIR166c,sbi-MIR166d,sbi-MIR166f,zma-MIR166g,zma-MIR166a,zma-MIR166d,zma…	aof-MIR166d	attaaaggaagctttctctttgaggggaatgttgtctggctcgaggccatcttttctgatccattaccctgatcatttctcttttcttttctattcatttatatcagattttaaaagatcaacaacccgtttctcaatttatattgtaaattaagactccatgagagagatcgaTCTCGGACCAGGCTTCATTCCcctcaatcacagcttccaaccccatct	aof-miR166a	TCTCGGACCAGGCTTCATTCC	3'	Diff	gp2a	...((((((((....((.((((((((..((((((..(((((((((((....(((....))).(((((((.......)))))))))))))).............(((....)))...))))..))))))..)))))))).)).....))))))))...	151	43.3	-56.2	0.8	166.5	0	26	0	11.5	5	48	158.5	0	76.5	64	32.5	62.6517	0	24.9058	0	8.11454	6.67787	32.8778	96.6934	0	41.8436	21.9215	37.1023	middle
37	43	aof-miR166a_L-2R+2_2	TCGGACCAGGCTTCATTCCTC	21	chr4	+	13137545	13137658	gatgaaagtaggatgtatggagtgaagcttgttccaagatctttataaatcagtcataattggtttggtttagatcTCGGACCAGGCTTCATTCCTCacacctttgcttttcca	35	aof-MIR166a,osa-MIR166h,osa-MIR166g,osa-MIR166b,bdi-MIR166f,bdi-MIR166b,sbi-MIR166f,sbi-MIR166k,sbi-MIR166h,sbi-MIR166a,zma-MIR166l,zma-MIR166m,zma-MIR166a,ata-MIR166d,mtr-MIR166f,mtr-MIR166b,mtr-MIR166c,gma-MIR166k,ptc-MIR166n,ptc-MIR166q,ptc-MIR166o,stu-MIR166b,mes-MIR166j,vvi-MIR166a,vvi-MIR166b,lus-MIR166f,lus-MIR166e,cme-MIR166e,sly-MIR166c,aqc-MIR166c,aqc-MIR166a,aqc-MIR166d,hbr-MIR166a,ssl…	aof-MIR166a	gagaaaggaaagtttgggtgtttggaatgaagtttgatccaagatcttttaatattaatgatcctaatgagtggctaattaagagaTCTCGGACCAGGCTTCATTCCtcacaccttgctttttcattacaga	aof-miR166a	TCTCGGACCAGGCTTCATTCC	3'	Diff	gp2a	...(((((((((.(((..(((((((((((((.(((.((((((...(((((((((....)))))))))....)))))).))).)))))))))))))..))))))..))))))...	108	39.5	-49.9	1.1	4569	366	1694	559	3488	1698	2724	567	170	4913	5657	2173	1719.25	865.951	1622.71	2528.13	2461.17	2267.8	1865.82	345.9	827.67	2687.29	1937.66	2480.72	high
38	44	aof-miR166a_L-2R+2_1	TCGGACCAGGCTTCATTCCCC	21	chr8	+	253343238	253343358	gatagttgaggggattgtcgtctggttcgaggcctttcacatgaaaagagaatccccggcccgaatcgcaaaacctctccgatgagagtttTCGGACCAGGCTTCATTCCCCctaactctt	219	aof-MIR166d,aof-MIR166a,osa-MIR166c,osa-MIR166j,osa-MIR166b,osa-MIR166a,osa-MIR166f,osa-MIR166d,osa-MIR166h,osa-MIR166m,osa-MIR166g,bdi-MIR166a,bdi-MIR166i,bdi-MIR166c,bdi-MIR166b,bdi-MIR166d,bdi-MIR166e,bdi-MIR166j,bdi-MIR166f,sbi-MIR166c,sbi-MIR166b,sbi-MIR166h,sbi-MIR166i,sbi-MIR166d,sbi-MIR166j,sbi-MIR166a,sbi-MIR166f,sbi-MIR166k,zma-MIR166h,zma-MIR166b,zma-MIR166i,zma-MIR166a,zma-MIR166e,zma…	aof-MIR166a	gagaaaggaaagtttgggtgtttggaatgaagtttgatccaagatcttttaatattaatgatcctaatgagtggctaattaagagaTCTCGGACCAGGCTTCATTCCtcacaccttgctttttcattacaga	aof-miR166a	TCTCGGACCAGGCTTCATTCC	3'	Diff	gp2a	...((((..(((((.((..(((((((((((((((((((....))))...........)))).............(((((....)))))...)))))))))))..)).)))))..))))...	115	51.2	-44.9	0.7	4569	366	1694	559	3488	1698	2724	567	170	4913	5657	2173	1719.25	865.951	1622.71	2528.13	2461.17	2267.8	1865.82	345.9	827.67	2687.29	1937.66	2480.72	high
39	45	aof-miR166a_1ss21CA	TCTCGGACCAGGCTTCATTCA	21	unanchor316	-	155859	156039	atagattgagaaaatcatgatcgagagagatgaaagtaggatgtatggagtgaagcttgttccaagatctttataaatcagtcataattggtttggtttagaTCTCGGACCAGGCTTCATTCCtcacacctttgcttttctattcatcatcatattgctactcatcatttgctcaatcaag	235	aof-MIR166a,aof-MIR166d,aof-MIR166b,aof-MIR166c,osa-MIR166h,osa-MIR166g,osa-MIR166d,osa-MIR166f,osa-MIR166a,osa-MIR166b,osa-MIR166m,osa-MIR166l,osa-MIR166i,osa-MIR166c,osa-MIR166j,bdi-MIR166i,bdi-MIR166b,bdi-MIR166c,bdi-MIR166f,bdi-MIR166e,bdi-MIR166j,bdi-MIR166a,bdi-MIR166d,bdi-MIR166h,sbi-MIR166i,sbi-MIR166f,sbi-MIR166h,sbi-MIR166a,sbi-MIR166d,sbi-MIR166k,sbi-MIR166e,sbi-MIR166c,sbi-MIR166b,sbi…	aof-MIR166d	attaaaggaagctttctctttgaggggaatgttgtctggctcgaggccatcttttctgatccattaccctgatcatttctcttttcttttctattcatttatatcagattttaaaagatcaacaacccgtttctcaatttatattgtaaattaagactccatgagagagatcgaTCTCGGACCAGGCTTCATTCCcctcaatcacagcttccaaccccatct	aof-miR166a	TCTCGGACCAGGCTTCATTCC	3'	Diff	gp2a	...(((((((.((((.((((.(((..((((((((((((((.(((..(((((((((((((.(((.((((((...(((((((((....)))))))))....)))))).))).)))))))))))))..))))))..))))......))))).))...)))....)))).)))).)))))))...	175	36.5	-66.2	1	32	0	5	0	24	0	16	19	0	29.5	65.5	18.5	12.0412	0	4.78958	0	16.9347	0	10.9593	11.591	0	16.1358	22.4353	21.1198	middle
40	46	aof-miR167b	TGAAGCTGCCAGCATGATCTGA	22	chr11	+	68634643	68634744	gcTGAAGCTGCCAGCATGATCTGAtatctctctcctctgtttgaaatctgattctaacgaaaggaaaagaaattaatcAGATCATGCTGCAGTTTCATCtcc	166	aof-MIR167b,aof-MIR167c,aof-MIR167a,osa-MIR167d,osa-MIR167g,osa-MIR167f,osa-MIR167h,osa-MIR167j,osa-MIR167e,osa-MIR167i,osa-MIR167b,osa-MIR167a,osa-MIR167c,bdi-MIR167d,bdi-MIR167g,bdi-MIR167e,bdi-MIR167c,bdi-MIR167a,bdi-MIR167f,bdi-MIR167b,sbi-MIR167g,sbi-MIR167d,sbi-MIR167h,sbi-MIR167f,sbi-MIR167e,sbi-MIR167c,sbi-MIR167b,sbi-MIR167i,sbi-MIR167a,zma-MIR167e,zma-MIR167f,zma-MIR167j,zma-MIR167g,zma…	aof-MIR167b	gattgtttagtgcaccaaaagtagcTGAAGCTGCCAGCATGATCTGAtctatttttgcccttatcatagaaaggcgcatcagatcatgttgcagtttcatctgctgatgggagcacaagataaacc	aof-miR167b	TGAAGCTGCCAGCATGATCTGA	5'	Yes	gp2a	..((((((((.((((((((((((((((.(((.((((.((((.(((......))).))))..))))..))).))..)))))))))))))))))))))).....	95	40.2	-41	1	12514	1425.5	1811.5	958	5375.5	4843.5	8861	20390	321	8897.5	2608	637.5	4708.85	3372.71	1735.26	4332.64	3793.02	6468.85	6069.38	12439	1562.84	4866.71	893.303	727.776	high
40	47	osa-miR167h-3p_2ss3GA12TC	AGATCATGCTGCAGTTTCATC	21	chr11	+	68634643	68634744	gcTGAAGCTGCCAGCATGATCTGAtatctctctcctctgtttgaaatctgattctaacgaaaggaaaagaaattaatcAGATCATGCTGCAGTTTCATCtcc	166	aof-MIR167b,aof-MIR167c,aof-MIR167a,osa-MIR167d,osa-MIR167g,osa-MIR167f,osa-MIR167h,osa-MIR167j,osa-MIR167e,osa-MIR167i,osa-MIR167b,osa-MIR167a,osa-MIR167c,bdi-MIR167d,bdi-MIR167g,bdi-MIR167e,bdi-MIR167c,bdi-MIR167a,bdi-MIR167f,bdi-MIR167b,sbi-MIR167g,sbi-MIR167d,sbi-MIR167h,sbi-MIR167f,sbi-MIR167e,sbi-MIR167c,sbi-MIR167b,sbi-MIR167i,sbi-MIR167a,zma-MIR167e,zma-MIR167f,zma-MIR167j,zma-MIR167g,zma…	osa-MIR167h	cacaagttggTGAAGCTGCCAGCATGATCTGatgatgatgatgatccacctctctcatctgtgttcttgattaattacggatcaatcgatcAGGTCATGCTGTAGTTTCATCtgctggtt	osa-miR167h-3p	AGGTCATGCTGTAGTTTCATC	3'	Diff	gp2a	..((((((((.((((((((((((((((.(((.((((.((((.(((......))).))))..))))..))).))..)))))))))))))))))))))).....	95	40.2	-41	1	290.5	31.5	27	0	0	0	149	461	10.5	7.5	0	11.5	109.311	74.5286	25.8637	0	0	0	102.058	281.235	51.1208	4.10231	0	13.1285	middle
41	48	aof-miR167b_1ss2GN	TNAAGCTGCCAGCATGATCTGA	22	chr5	-	51964185	51964333	ttcttttagtgccccactagtagcTGAAGCTGCCAGCATGATCTGAacaatcttgtcttttgtttgaaaatttaatctaccaacatactgaaagaaattaaatcAGATCATGTTGCAGTTTCATCtgctgatgggggcacatgaaaacc	103	aof-MIR167b,osa-MIR167f,osa-MIR167h,osa-MIR167j,osa-MIR167d,osa-MIR167g,osa-MIR167i,osa-MIR167b,bdi-MIR167e,bdi-MIR167c,bdi-MIR167d,bdi-MIR167g,sbi-MIR167f,sbi-MIR167e,sbi-MIR167d,sbi-MIR167g,sbi-MIR167h,sbi-MIR167b,zma-MIR167e,zma-MIR167f,zma-MIR167j,zma-MIR167b,tae-MIR167c,ata-MIR167d,ata-MIR167b,ata-MIR167a,ata-MIR167f,vca-MIR167a,vca-MIR167b,sof-MIR167b,sof-MIR167a,ssp-MIR167b,gma-MIR167g,gma…	aof-MIR167b	gattgtttagtgcaccaaaagtagcTGAAGCTGCCAGCATGATCTGAtctatttttgcccttatcatagaaaggcgcatcagatcatgttgcagtttcatctgctgatgggagcacaagataaacc	aof-miR167b	TGAAGCTGCCAGCATGATCTGA	5'	Diff	gp2a	...((((((((((((..((((((.((((((((.(((((((((((((.........((((((((.((.................)).)).)))))).......))))))))))))))))))))).))))))...))))))).)))))...	143	38.3	-59.2	1	121.5	0	3.5	0	26.5	24	38	241.5	0	47	8.5	0	45.7188	0	3.35271	0	18.6987	32.0538	26.0283	147.328	0	25.7078	2.91145	0	middle
41	47	osa-miR167h-3p_2ss3GA12TC	AGATCATGCTGCAGTTTCATC	21	chr5	-	51964185	51964333	ttcttttagtgccccactagtagcTGAAGCTGCCAGCATGATCTGAacaatcttgtcttttgtttgaaaatttaatctaccaacatactgaaagaaattaaatcAGATCATGTTGCAGTTTCATCtgctgatgggggcacatgaaaacc	103	aof-MIR167b,osa-MIR167f,osa-MIR167h,osa-MIR167j,osa-MIR167d,osa-MIR167g,osa-MIR167i,osa-MIR167b,bdi-MIR167e,bdi-MIR167c,bdi-MIR167d,bdi-MIR167g,sbi-MIR167f,sbi-MIR167e,sbi-MIR167d,sbi-MIR167g,sbi-MIR167h,sbi-MIR167b,zma-MIR167e,zma-MIR167f,zma-MIR167j,zma-MIR167b,tae-MIR167c,ata-MIR167d,ata-MIR167b,ata-MIR167a,ata-MIR167f,vca-MIR167a,vca-MIR167b,sof-MIR167b,sof-MIR167a,ssp-MIR167b,gma-MIR167g,gma…	osa-MIR167h	cacaagttggTGAAGCTGCCAGCATGATCTGatgatgatgatgatccacctctctcatctgtgttcttgattaattacggatcaatcgatcAGGTCATGCTGTAGTTTCATCtgctggtt	osa-miR167h-3p	AGGTCATGCTGTAGTTTCATC	3'	Diff	gp2a	...((((((((((((..((((((.((((((((.(((((((((((((.........((((((((.((.................)).)).)))))).......))))))))))))))))))))).))))))...))))))).)))))...	143	38.3	-59.2	1	290.5	31.5	27	0	0	0	149	461	10.5	7.5	0	11.5	109.311	74.5286	25.8637	0	0	0	102.058	281.235	51.1208	4.10231	0	13.1285	middle
42	46	aof-miR167b	TGAAGCTGCCAGCATGATCTGA	22	unanchor385	+	2047517	2047665	ttcttttagtgccccactagtagcTGAAGCTGCCAGCATGATCTGAacaatcttgtcttttgtttgaaaatttaatctaccaacatactgaaagaaattaaatcAGATCATGTTGCAGTTTCATCtgctgatgggggcacatgaaaacc	170	aof-MIR167b,aof-MIR167c,aof-MIR167a,osa-MIR167i,osa-MIR167h,osa-MIR167j,osa-MIR167f,osa-MIR167g,osa-MIR167d,osa-MIR167e,osa-MIR167c,osa-MIR167a,osa-MIR167b,bdi-MIR167e,bdi-MIR167c,bdi-MIR167d,bdi-MIR167g,bdi-MIR167a,bdi-MIR167b,bdi-MIR167f,sbi-MIR167f,sbi-MIR167e,sbi-MIR167h,sbi-MIR167d,sbi-MIR167g,sbi-MIR167a,sbi-MIR167b,sbi-MIR167c,sbi-MIR167i,zma-MIR167f,zma-MIR167j,zma-MIR167e,zma-MIR167h,zma…	aof-MIR167b	gattgtttagtgcaccaaaagtagcTGAAGCTGCCAGCATGATCTGAtctatttttgcccttatcatagaaaggcgcatcagatcatgttgcagtttcatctgctgatgggagcacaagataaacc	aof-miR167b	TGAAGCTGCCAGCATGATCTGA	5'	Yes	gp2a	...((((((((((((..((((((.((((((((.(((((((((((((.........((((((((.((.................)).)).)))))).......))))))))))))))))))))).))))))...))))))).)))))...	143	38.3	-59.2	1	12514	1425.5	1811.5	958	5375.5	4843.5	8861	20390	321	8897.5	2608	637.5	4708.85	3372.71	1735.26	4332.64	3793.02	6468.85	6069.38	12439	1562.84	4866.71	893.303	727.776	high
42	49	vca-miR167a-3p_L-1R+1_1ss11GT	AGATCATGTTGCAGTTTCATC	21	unanchor385	+	2047517	2047665	ttcttttagtgccccactagtagcTGAAGCTGCCAGCATGATCTGAacaatcttgtcttttgtttgaaaatttaatctaccaacatactgaaagaaattaaatcAGATCATGTTGCAGTTTCATCtgctgatgggggcacatgaaaacc	170	aof-MIR167b,aof-MIR167c,aof-MIR167a,osa-MIR167i,osa-MIR167h,osa-MIR167j,osa-MIR167f,osa-MIR167g,osa-MIR167d,osa-MIR167e,osa-MIR167c,osa-MIR167a,osa-MIR167b,bdi-MIR167e,bdi-MIR167c,bdi-MIR167d,bdi-MIR167g,bdi-MIR167a,bdi-MIR167b,bdi-MIR167f,sbi-MIR167f,sbi-MIR167e,sbi-MIR167h,sbi-MIR167d,sbi-MIR167g,sbi-MIR167a,sbi-MIR167b,sbi-MIR167c,sbi-MIR167i,zma-MIR167f,zma-MIR167j,zma-MIR167e,zma-MIR167h,zma…	vca-MIR167a	agtagaTGAAGCTGCCAGCATGATCTGAccatctctctttctctctctctctctctctaaaagagaagagggaactatCAGATCATGTGGCAGTTTCATctgct	vca-miR167a-3p	CAGATCATGTGGCAGTTTCAT	3'	Diff	gp2a	...((((((((((((..((((((.((((((((.(((((((((((((.........((((((((.((.................)).)).)))))).......))))))))))))))))))))).))))))...))))))).)))))...	143	38.3	-59.2	1	4	0	4.5	0	17	8	6.5	30	4	56.5	21.5	30	1.50515	0	4.31062	0	11.9954	10.6846	4.45221	18.3016	19.4746	30.9041	7.36427	34.2483	middle
43	50	aof-miR167c_R+1_2	TGAAGCTGCCAGCATGATCTGG	22	chr11	+	68769887	68770068	gcagcatatttcgatgaacaattatacccaggggaatgagTGAAGCTGCCAGCATGATCTGGctctgaatgaactataatatttgtggaacaacagaacaaatatttctacagtgattccttgctaGGTCATGCTCTGACAGCCTCACTtcttcccacaattgggcattcaagatttgccac	165	aof-MIR167c,aof-MIR167b,aof-MIR167a,osa-MIR167i,osa-MIR167e,osa-MIR167d,osa-MIR167g,osa-MIR167f,osa-MIR167j,osa-MIR167h,osa-MIR167b,osa-MIR167a,osa-MIR167c,bdi-MIR167d,bdi-MIR167g,bdi-MIR167e,bdi-MIR167c,bdi-MIR167b,bdi-MIR167f,bdi-MIR167a,sbi-MIR167c,sbi-MIR167d,sbi-MIR167g,sbi-MIR167h,sbi-MIR167f,sbi-MIR167e,sbi-MIR167i,sbi-MIR167b,sbi-MIR167a,zma-MIR167g,zma-MIR167i,zma-MIR167h,zma-MIR167e,zma…	aof-MIR167c	tgtgagtgctTGAAGCTGCCAGCATGATCTGgtcatctaaaacttagatcaattagttatatttatgtgagaaactttgttttggttatctttatcattagtactactacatagagttcttgacgtcattttgatgatttctagcttgtttacatattattttatttgttgataggatttgaggtctaattgcatagaattttgtaagcctgcattcattctcatcagatcatcttgcagcttcaatcactcact	aof-miR167c	TGAAGCTGCCAGCATGATCTG	5'	Diff	gp2a	...(((.((((.((((..(((((........(((((..(((((.((((.((((((((((((((...((((..(((..(((((((((...........))))))))).....))).))))...)))))))))))))..).)))).)))))..)))))..)))))..))))..)))).)))...	176	42.3	-62.1	0.8	28.5	7.5	2.5	7.5	18	24.5	8	26	0	11.5	18.5	15	10.7242	17.7449	2.39479	33.9194	12.701	32.7216	5.47964	15.8614	0	6.29021	6.3367	17.1241	middle
43	51	zma-miR167d-3p_4ss10GC11CT12TG13GA	GGTCATGCTCTGACAGCCTCACT	23	chr11	+	68769887	68770068	gcagcatatttcgatgaacaattatacccaggggaatgagTGAAGCTGCCAGCATGATCTGGctctgaatgaactataatatttgtggaacaacagaacaaatatttctacagtgattccttgctaGGTCATGCTCTGACAGCCTCACTtcttcccacaattgggcattcaagatttgccac	165	aof-MIR167c,aof-MIR167b,aof-MIR167a,osa-MIR167i,osa-MIR167e,osa-MIR167d,osa-MIR167g,osa-MIR167f,osa-MIR167j,osa-MIR167h,osa-MIR167b,osa-MIR167a,osa-MIR167c,bdi-MIR167d,bdi-MIR167g,bdi-MIR167e,bdi-MIR167c,bdi-MIR167b,bdi-MIR167f,bdi-MIR167a,sbi-MIR167c,sbi-MIR167d,sbi-MIR167g,sbi-MIR167h,sbi-MIR167f,sbi-MIR167e,sbi-MIR167i,sbi-MIR167b,sbi-MIR167a,zma-MIR167g,zma-MIR167i,zma-MIR167h,zma-MIR167e,zma…	zma-MIR167d	tgcccaagggaacgagTGAAGCTGCCAGCATGATCTAgctctgagtgatcacccgaaaaagaacaatagttctaggtggtcatgccttgctaGGTCATGCTGCTGCAGCCTCACTtcttcccgtcgttgggca	zma-miR167d-3p	GGTCATGCTGCTGCAGCCTCACT	3'	Diff	gp2a	...(((.((((.((((..(((((........(((((..(((((.((((.((((((((((((((...((((..(((..(((((((((...........))))))))).....))).))))...)))))))))))))..).)))).)))))..)))))..)))))..))))..)))).)))...	176	42.3	-62.1	0.8	0	0	0	0	10	0	0	0	0	8	60	5	0	0	0	0	7.05612	0	0	0	0	4.3758	20.5514	5.70805	middle
44	52	aof-miR167c	TGAAGCTGCCAGCATGATCTG	21	chr4	+	47133470	47133616	ttcttttagtgccccactagtagcTGAAGCTGCCAGCATGATCTGaatcttttgtttggaaaatttaatctaccaacaaactgatgatcaggaaatcaaatcAGATCATGTTGCAGTTTCATCtgctgatgggggcacatgaaaacc	164	aof-MIR167c,aof-MIR167b,aof-MIR167a,osa-MIR167j,osa-MIR167h,osa-MIR167i,osa-MIR167e,osa-MIR167f,osa-MIR167g,osa-MIR167d,osa-MIR167c,osa-MIR167a,osa-MIR167b,bdi-MIR167c,bdi-MIR167e,bdi-MIR167g,bdi-MIR167d,bdi-MIR167f,bdi-MIR167b,bdi-MIR167a,sbi-MIR167e,sbi-MIR167f,sbi-MIR167h,sbi-MIR167g,sbi-MIR167d,sbi-MIR167c,sbi-MIR167a,sbi-MIR167b,sbi-MIR167i,zma-MIR167i,zma-MIR167h,zma-MIR167g,zma-MIR167j,zma…	aof-MIR167c	tgtgagtgctTGAAGCTGCCAGCATGATCTGgtcatctaaaacttagatcaattagttatatttatgtgagaaactttgttttggttatctttatcattagtactactacatagagttcttgacgtcattttgatgatttctagcttgtttacatattattttatttgttgataggatttgaggtctaattgcatagaattttgtaagcctgcattcattctcatcagatcatcttgcagcttcaatcactcact	aof-miR167c	TGAAGCTGCCAGCATGATCTG	5'	Yes	gp2a	...((((((((((((..((((((.((((((((.(((((((((((((....((((((((((........))))..))))))(((.....))).........))))))))))))))))))))).))))))...))))))).)))))...	141	40.1	-62.3	1.1	508	66.5	199	102	449	349	445.5	1292.5	34	248	164	319	191.154	157.338	190.625	461.304	316.82	466.115	305.147	788.494	165.534	135.65	56.174	364.174	high
44	53	vca-miR167b-3p	AGATCATGTTGCAGTTTCATC	21	chr4	+	47133470	47133616	ttcttttagtgccccactagtagcTGAAGCTGCCAGCATGATCTGaatcttttgtttggaaaatttaatctaccaacaaactgatgatcaggaaatcaaatcAGATCATGTTGCAGTTTCATCtgctgatgggggcacatgaaaacc	164	aof-MIR167c,aof-MIR167b,aof-MIR167a,osa-MIR167j,osa-MIR167h,osa-MIR167i,osa-MIR167e,osa-MIR167f,osa-MIR167g,osa-MIR167d,osa-MIR167c,osa-MIR167a,osa-MIR167b,bdi-MIR167c,bdi-MIR167e,bdi-MIR167g,bdi-MIR167d,bdi-MIR167f,bdi-MIR167b,bdi-MIR167a,sbi-MIR167e,sbi-MIR167f,sbi-MIR167h,sbi-MIR167g,sbi-MIR167d,sbi-MIR167c,sbi-MIR167a,sbi-MIR167b,sbi-MIR167i,zma-MIR167i,zma-MIR167h,zma-MIR167g,zma-MIR167j,zma…	vca-MIR167b	agcggcTGAAGCTGCCAGCATGATCTGAtctctctctctctctctctctctctctctctcctccccttttagggttaatatcAGATCATGTTGCAGTTTCATCtgct	vca-miR167b-3p	AGATCATGTTGCAGTTTCATC	3'	Yes	gp2a	...((((((((((((..((((((.((((((((.(((((((((((((....((((((((((........))))..))))))(((.....))).........))))))))))))))))))))).))))))...))))))).)))))...	141	40.1	-62.3	1.1	4	0	4.5	0	17	8	6.5	30	4	56.5	21.5	30	1.50515	0	4.31062	0	11.9954	10.6846	4.45221	18.3016	19.4746	30.9041	7.36427	34.2483	middle
45	54	aof-miR167b_L-1R+1	GAAGCTGCCAGCATGATCTGAT	22	chr6	-	199454679	199454817	tatggtgcactttaagaagctGAAGCTGCCAGCATGATCTGATatctctctctcgatcctctgtttgaaatctagttctaacaaaagggaaataaattgatcAGATTATGTTGCAGTTTCATCttctaatagtaccacc	66	aof-MIR167b,osa-MIR167g,osa-MIR167d,osa-MIR167j,osa-MIR167h,osa-MIR167f,osa-MIR167i,bdi-MIR167d,bdi-MIR167g,bdi-MIR167e,bdi-MIR167c,sbi-MIR167h,sbi-MIR167d,sbi-MIR167g,sbi-MIR167f,sbi-MIR167e,sbi-MIR167b,zma-MIR167j,zma-MIR167f,zma-MIR167e,tae-MIR167c,ata-MIR167b,ata-MIR167d,ata-MIR167f,vca-MIR167a,vca-MIR167b,sof-MIR167a,sof-MIR167b,ssp-MIR167b,gma-MIR167g,gma-MIR167j,gma-MIR167e,gma-MIR167f,gma…	aof-MIR167b	gattgtttagtgcaccaaaagtagcTGAAGCTGCCAGCATGATCTGAtctatttttgcccttatcatagaaaggcgcatcagatcatgttgcagtttcatctgctgatgggagcacaagataaacc	aof-miR167b	TGAAGCTGCCAGCATGATCTGA	5'	Diff	gp2a	..((((((...((.(((((.((((((((.((((((((((((((.............((((.((((.(((......))).))))...)))).........)))))))))))))))))))))).)))))))..))))))..	135	37.4	-48.2	0.9	172	0	17	0	33	24	60.5	290.5	0	56.5	13.5	0	64.7213	0	16.2846	0	23.2852	32.0538	41.4398	177.22	0	30.9041	4.62408	0	middle
45	55	aof-MIR167b-p3_1ss5CT	AGATTATGTTGCAGTTTCATC	21	chr6	-	199454679	199454817	tatggtgcactttaagaagctGAAGCTGCCAGCATGATCTGATatctctctctcgatcctctgtttgaaatctagttctaacaaaagggaaataaattgatcAGATTATGTTGCAGTTTCATCttctaatagtaccacc	66	aof-MIR167b,osa-MIR167g,osa-MIR167d,osa-MIR167j,osa-MIR167h,osa-MIR167f,osa-MIR167i,bdi-MIR167d,bdi-MIR167g,bdi-MIR167e,bdi-MIR167c,sbi-MIR167h,sbi-MIR167d,sbi-MIR167g,sbi-MIR167f,sbi-MIR167e,sbi-MIR167b,zma-MIR167j,zma-MIR167f,zma-MIR167e,tae-MIR167c,ata-MIR167b,ata-MIR167d,ata-MIR167f,vca-MIR167a,vca-MIR167b,sof-MIR167a,sof-MIR167b,ssp-MIR167b,gma-MIR167g,gma-MIR167j,gma-MIR167e,gma-MIR167f,gma…	aof-MIR167b	gattgtttagtgcaccaaaagtagcTGAAGCTGCCAGCATGATCTGAtctatttttgcccttatcatagaaaggcgcatcagatcatgttgcagtttcatctgctgatgggagcacaagataaacc	aof-MIR167b-p3	agatcatgttgcagtttcatc	3'	New	gp2a	..((((((...((.(((((.((((((((.((((((((((((((.............((((.((((.(((......))).))))...)))).........)))))))))))))))))))))).)))))))..))))))..	135	37.4	-48.2	0.9	57	17.5	32	0	0	0	48	45.5	11.5	0	0	2.5	21.4483	41.4048	30.6533	0	0	0	32.8778	27.7574	55.9894	0	0	2.85402	middle
46	56	aof-miR167a	TGAAGCTGCCAGCATGATCTA	21	chr8	-	77474865	77475017	taggggaatgagTGAAGCTGCCAGCATGATCTAgctttgaatgacttgaaacaaagcatatactataaattagtatatatatatgtatatatactgtttgttatgcaaggtcaaccattgctaGGTCATGCTCCGGTAGCCTCACTtcttccc	78	aof-MIR167a,osa-MIR167c,osa-MIR167a,osa-MIR167b,bdi-MIR167b,bdi-MIR167f,bdi-MIR167a,sbi-MIR167a,sbi-MIR167b,sbi-MIR167i,zma-MIR167d,zma-MIR167c,zma-MIR167b,zma-MIR167a,tae-MIR167a,ata-MIR167a,ata-MIR167c,ata-MIR167e,mtr-MIR167a,gma-MIR167l,gma-MIR167b,gma-MIR167a,gma-MIR167d,ptc-MIR167b,ptc-MIR167d,ptc-MIR167c,ptc-MIR167a,ath-MIR167a,ath-MIR167b,mdm-MIR167e,mdm-MIR167f,mdm-MIR167g,mdm-MIR167c,mdm…	aof-MIR167a	ggggaatgagTGAAGCTGCCAGCATGATCTAgctttgattgacacaaatcttatatattatattgaacaccaaaaattaagggtcaacccttgctaggtcatgctccggcagcctcacttcttccctc	aof-miR167a	TGAAGCTGCCAGCATGATCTA	5'	Yes	gp2a	...(((((..(((((.(((((((((((((((((((..((..((((((........(((((....((((((.((((((((((....))))))))))))))))))))).))))))..))..)))))))))))))..)))))).)))))..)))))	150	37.9	-68.3	1.2	4.5	0	2.5	2.5	5	0	5.5	6	0	14.5	14.5	0	1.69329	0	2.39479	11.3065	3.52806	0	3.76725	3.66032	0	7.93114	4.9666	0	middle
46	57	osa-miR167c-3p_2ss10GC14CT	GGTCATGCTCCGGTAGCCTCACT	23	chr8	-	77474865	77475017	taggggaatgagTGAAGCTGCCAGCATGATCTAgctttgaatgacttgaaacaaagcatatactataaattagtatatatatatgtatatatactgtttgttatgcaaggtcaaccattgctaGGTCATGCTCCGGTAGCCTCACTtcttccc	78	aof-MIR167a,osa-MIR167c,osa-MIR167a,osa-MIR167b,bdi-MIR167b,bdi-MIR167f,bdi-MIR167a,sbi-MIR167a,sbi-MIR167b,sbi-MIR167i,zma-MIR167d,zma-MIR167c,zma-MIR167b,zma-MIR167a,tae-MIR167a,ata-MIR167a,ata-MIR167c,ata-MIR167e,mtr-MIR167a,gma-MIR167l,gma-MIR167b,gma-MIR167a,gma-MIR167d,ptc-MIR167b,ptc-MIR167d,ptc-MIR167c,ptc-MIR167a,ath-MIR167a,ath-MIR167b,mdm-MIR167e,mdm-MIR167f,mdm-MIR167g,mdm-MIR167c,mdm…	osa-MIR167c	tgtccaagggaacgagTGAAGCTGCCAGCATGATCTAgctctgaatgatcaacaagatgtgctcccacactgccttcctgtggatcttgagctgttgctagtcttgtggtcatgccttgctaGGTCATGCTGCGGCAGCCTCACTtcttcccattgttgggca	osa-miR167c-3p	GGTCATGCTGCGGCAGCCTCACT	3'	Diff	gp2a	...(((((..(((((.(((((((((((((((((((..((..((((((........(((((....((((((.((((((((((....))))))))))))))))))))).))))))..))..)))))))))))))..)))))).)))))..)))))	150	37.9	-68.3	1.2	0	0	0	0	0	0	0	0	0	0	11	0	0	0	0	0	0	0	0	0	0	0	3.76777	0	low
47	58	aof-miR167c_R+1_1	TGAAGCTGCCAGCATGATCTGC	22	chr3	-	187063654	187063806	ggtgtgaggggcTGAAGCTGCCAGCATGATCTGGtcttcttatacttgatttatatgcttacatatatatatctaagtgcaatgtttatcagatatggaggatatatacctcgatatttatcagatcatcttgcagcttcaatcactcactca	131	aof-MIR167c,aof-MIR167b,aof-MIR167a,osa-MIR167i,osa-MIR167e,osa-MIR167j,osa-MIR167d,osa-MIR167c,osa-MIR167a,osa-MIR167b,bdi-MIR167c,bdi-MIR167a,bdi-MIR167f,bdi-MIR167b,sbi-MIR167c,sbi-MIR167g,sbi-MIR167d,sbi-MIR167a,sbi-MIR167b,sbi-MIR167i,zma-MIR167i,zma-MIR167h,zma-MIR167g,zma-MIR167f,zma-MIR167e,zma-MIR167d,zma-MIR167b,zma-MIR167c,zma-MIR167a,tae-MIR167c,tae-MIR167a,ata-MIR167f,ata-MIR167a,ata…	aof-MIR167c	tgtgagtgctTGAAGCTGCCAGCATGATCTGgtcatctaaaacttagatcaattagttatatttatgtgagaaactttgttttggttatctttatcattagtactactacatagagttcttgacgtcattttgatgatttctagcttgtttacatattattttatttgttgataggatttgaggtctaattgcatagaattttgtaagcctgcattcattctcatcagatcatcttgcagcttcaatcactcact	aof-miR167c	TGAAGCTGCCAGCATGATCTG	5'	Diff	gp2a	((.(((((.(..(((((((((.((.((((((((((.......((((((((.((((((......)))))).))).)))))...........((((((.((((.......)))).)))))))))))))))))).)))))))))..).))))))).	152	37.3	-56.3	1	28.5	7.5	2.5	7.5	18	24.5	8	26	0	11.5	18.5	15	10.7242	17.7449	2.39479	33.9194	12.701	32.7216	5.47964	15.8614	0	6.29021	6.3367	17.1241	middle
48	59	aof-miR168a	TCGCTTGGTGCAGGTCGGGAA	21	chr6	-	80135147	80135263	atatgagcgcctccgcttctgatTCGCTTGGTGCAGGTCGGGAAcgcccggatccgggtcggcggtggcaggttCCTGCCTTGCATCAACTGAATcggagtcggatcgcgaccagtc	41	aof-MIR168a,aof-MIR168b,vca-MIR168b,vca-MIR168a,mtr-MIR168c,mtr-MIR168b,mtr-MIR168a,gma-MIR168b,gma-MIR168a,ptc-MIR168a,ptc-MIR168b,ath-MIR168a,ath-MIR168b,mdm-MIR168a,mdm-MIR168b,lja-MIR168,aly-MIR168a,aly-MIR168b,ppe-MIR168,mes-MIR168a,vvi-MIR168,nta-MIR168d,nta-MIR168e,nta-MIR168c,nta-MIR168b,nta-MIR168a,csi-MIR168,lus-MIR168a,lus-MIR168b,cme-MIR168,sly-MIR168a,sly-MIR168b,bra-MIR168a,bna-MIR1…	aof-MIR168a	ctgtttcatcgctgttctctcggatTCGCTTGGTGCAGGTCGGGAAcggtctgccgccgtacgatcagatcaggttccgatcagattcgatcctgtccgtccattgggcggctcagttcccgccgtgcatcaagtgaattcgagagtgtccggcgaaaggacga	aof-miR168a	TCGCTTGGTGCAGGTCGGGAA	5'	Yes	gp2a	...((..(((.((((..((((((((..((((((((((.(((((((.((((....))))...((....))..))))))).))))))))))..))))))))..))))..)))..))...	111	62.4	-56.7	0.8	27880.5	922	4078	115	1581.5	544.5	8947.5	21041	146.5	2682.5	7374	131	10491.1	2181.44	3906.38	520.097	1115.93	727.22	6128.63	12836.1	713.257	1467.26	2525.77	149.551	high
48	60	vca-miR168b-3p_2ss3CT12CT	CCTGCCTTGCATCAACTGAAT	21	chr6	-	80135147	80135263	atatgagcgcctccgcttctgatTCGCTTGGTGCAGGTCGGGAAcgcccggatccgggtcggcggtggcaggttCCTGCCTTGCATCAACTGAATcggagtcggatcgcgaccagtc	41	aof-MIR168a,aof-MIR168b,vca-MIR168b,vca-MIR168a,mtr-MIR168c,mtr-MIR168b,mtr-MIR168a,gma-MIR168b,gma-MIR168a,ptc-MIR168a,ptc-MIR168b,ath-MIR168a,ath-MIR168b,mdm-MIR168a,mdm-MIR168b,lja-MIR168,aly-MIR168a,aly-MIR168b,ppe-MIR168,mes-MIR168a,vvi-MIR168,nta-MIR168d,nta-MIR168e,nta-MIR168c,nta-MIR168b,nta-MIR168a,csi-MIR168,lus-MIR168a,lus-MIR168b,cme-MIR168,sly-MIR168a,sly-MIR168b,bra-MIR168a,bna-MIR1…	vca-MIR168b	atTCGCTTGGTGCAGGTCGGGAAcgccctccgatcgccgccgacgccgccccctgatcgtgcccgctttCCCGCCTTGCACCAACTGAAT	vca-miR168b-3p	CCCGCCTTGCACCAACTGAAT	3'	Diff	gp2a	...((..(((.((((..((((((((..((((((((((.(((((((.((((....))))...((....))..))))))).))))))))))..))))))))..))))..)))..))...	111	62.4	-56.7	0.8	17648.5	978.5	2607.5	67	794	372.5	5490.5	17285.5	252	2317	4207.5	332	6640.89	2315.12	2497.77	303.013	560.256	497.501	3760.74	10545.1	1226.9	1267.34	1441.17	379.015	high
49	59	aof-miR168a	TCGCTTGGTGCAGGTCGGGAA	21	chr9	-	177456602	177456717	ggatcgctgccgcctctgatTCGCTTGGTGCAGGTCGGGAAcgacggcgactccgatctcgagatgtgctccgattCCCGCCTTGCACCAACTGAATCggaggcggaatgcgacga	50	aof-MIR168a,aof-MIR168b,osa-MIR168a,bdi-MIR168,sbi-MIR168,zma-MIR168a,ata-MIR168,hvu-MIR168,vca-MIR168b,vca-MIR168a,sof-MIR168a,sof-MIR168b,ssp-MIR168a,mtr-MIR168c,mtr-MIR168b,mtr-MIR168a,gma-MIR168a,gma-MIR168b,ptc-MIR168b,ptc-MIR168a,ath-MIR168a,ath-MIR168b,mdm-MIR168b,mdm-MIR168a,lja-MIR168,aly-MIR168a,aly-MIR168b,ppe-MIR168,mes-MIR168a,vvi-MIR168,nta-MIR168d,nta-MIR168e,nta-MIR168b,nta-MIR168…	aof-MIR168a	ctgtttcatcgctgttctctcggatTCGCTTGGTGCAGGTCGGGAAcggtctgccgccgtacgatcagatcaggttccgatcagattcgatcctgtccgtccattgggcggctcagttcccgccgtgcatcaagtgaattcgagagtgtccggcgaaaggacga	aof-miR168a	TCGCTTGGTGCAGGTCGGGAA	5'	Yes	gp2a	...((((..(((((((((((((..((((((((((.((((((((..((((..((((....)).))..)))).)).)))))).))))))))))..)))))))))))))...))))...	110	62.1	-67.5	0.9	27880.5	922	4078	115	1581.5	544.5	8947.5	21041	146.5	2682.5	7374	131	10491.1	2181.44	3906.38	520.097	1115.93	727.22	6128.63	12836.1	713.257	1467.26	2525.77	149.551	high
49	61	osa-miR168a-3p_L-3R+1_1ss19GC	CCCGCCTTGCACCAACTGAATT	22	chr9	-	177456602	177456717	ggatcgctgccgcctctgatTCGCTTGGTGCAGGTCGGGAAcgacggcgactccgatctcgagatgtgctccgattCCCGCCTTGCACCAACTGAATCggaggcggaatgcgacga	50	aof-MIR168a,aof-MIR168b,osa-MIR168a,bdi-MIR168,sbi-MIR168,zma-MIR168a,ata-MIR168,hvu-MIR168,vca-MIR168b,vca-MIR168a,sof-MIR168a,sof-MIR168b,ssp-MIR168a,mtr-MIR168c,mtr-MIR168b,mtr-MIR168a,gma-MIR168a,gma-MIR168b,ptc-MIR168b,ptc-MIR168a,ath-MIR168a,ath-MIR168b,mdm-MIR168b,mdm-MIR168a,lja-MIR168,aly-MIR168a,aly-MIR168b,ppe-MIR168,mes-MIR168a,vvi-MIR168,nta-MIR168d,nta-MIR168e,nta-MIR168b,nta-MIR168…	osa-MIR168a	cgcctcgggcTCGCTTGGTGCAGATCGGGACccgccgccgccgctgccggggccgGATCCCGCCTTGCACCAAGTGAATcggagccg	osa-miR168a-3p	GATCCCGCCTTGCACCAAGTGAAT	3'	Diff	gp2a	...((((..(((((((((((((..((((((((((.((((((((..((((..((((....)).))..)))).)).)))))).))))))))))..)))))))))))))...))))...	110	62.1	-67.5	0.9	72.5	2.5	11	0	6.5	2.5	12	61.5	0	62.5	196	3.5	27.2808	5.91497	10.5371	0	4.58648	3.33893	8.21946	37.5183	0	34.1859	67.1347	3.99563	middle
50	62	aof-miR168b_R-1_1ss20TA	TCGCTTGGTGCAGGTCGGGA	20	chr9	-	203720908	203721018	tgatcgcctccgcttctgatTCGCTTGGTGCAGGTCGGGAacgcctggatccgggttggcggtggcgtgttCCTGCCTTGCATCAACTGAATcggagtcggattgcgaccc	40	aof-MIR168b,aof-MIR168a,vca-MIR168b,vca-MIR168a,mtr-MIR168c,mtr-MIR168b,gma-MIR168a,gma-MIR168b,ptc-MIR168b,ptc-MIR168a,ath-MIR168a,ath-MIR168b,mdm-MIR168b,mdm-MIR168a,lja-MIR168,aly-MIR168a,aly-MIR168b,ppe-MIR168,mes-MIR168a,vvi-MIR168,nta-MIR168b,nta-MIR168c,nta-MIR168a,nta-MIR168d,nta-MIR168e,csi-MIR168,lus-MIR168a,lus-MIR168b,cme-MIR168,sly-MIR168a,sly-MIR168b,bra-MIR168c,bra-MIR168a,bna-MIR1…	aof-MIR168b	tttcgatttcgcgtccgcctctgatTCGCTTGGTGCAGGTCGGGTCcgcctcgatccggcatccggcgacggcgatggcggcggatcccgccttgcatcaactgaatcggaggcggatcagcgagtggattg	aof-miR168b	TCGCTTGGTGCAGGTCGGGTC	5'	Diff	gp2a	...((((.((((..((((((((..((((((((((.(((((((((((....(((......))).)).))))))))).))))))))))..))))))))..))))..))))...	105	61.3	-54.4	0.8	2039.5	147	473.5	16.5	126.5	85.5	2635.5	1391	119.5	168.5	398	124.5	767.436	347.8	453.573	74.6227	89.2599	114.192	1805.2	848.584	581.803	92.1653	136.325	142.13	high
50	60	vca-miR168b-3p_2ss3CT12CT	CCTGCCTTGCATCAACTGAAT	21	chr9	-	203720908	203721018	tgatcgcctccgcttctgatTCGCTTGGTGCAGGTCGGGAacgcctggatccgggttggcggtggcgtgttCCTGCCTTGCATCAACTGAATcggagtcggattgcgaccc	40	aof-MIR168b,aof-MIR168a,vca-MIR168b,vca-MIR168a,mtr-MIR168c,mtr-MIR168b,gma-MIR168a,gma-MIR168b,ptc-MIR168b,ptc-MIR168a,ath-MIR168a,ath-MIR168b,mdm-MIR168b,mdm-MIR168a,lja-MIR168,aly-MIR168a,aly-MIR168b,ppe-MIR168,mes-MIR168a,vvi-MIR168,nta-MIR168b,nta-MIR168c,nta-MIR168a,nta-MIR168d,nta-MIR168e,csi-MIR168,lus-MIR168a,lus-MIR168b,cme-MIR168,sly-MIR168a,sly-MIR168b,bra-MIR168c,bra-MIR168a,bna-MIR1…	vca-MIR168b	atTCGCTTGGTGCAGGTCGGGAAcgccctccgatcgccgccgacgccgccccctgatcgtgcccgctttCCCGCCTTGCACCAACTGAAT	vca-miR168b-3p	CCCGCCTTGCACCAACTGAAT	3'	Diff	gp2a	...((((.((((..((((((((..((((((((((.(((((((((((....(((......))).)).))))))))).))))))))))..))))))))..))))..))))...	105	61.3	-54.4	0.8	17648.5	978.5	2607.5	67	794	372.5	5490.5	17285.5	252	2317	4207.5	332	6640.89	2315.12	2497.77	303.013	560.256	497.501	3760.74	10545.1	1226.9	1267.34	1441.17	379.015	high
51	63	osa-miR168a-3p_L-3_1ss19GC	CCCGCCTTGCACCAACTGAAT	21	chr6	+	102880386	102880478	gtcgcctctgattcgcttggtgcagatcgggaacgtcttcgatctcgatatctgctccgattCCCGCCTTGCACCAACTGAATcagaggccga	39	aof-MIR168b,osa-MIR168a,bdi-MIR168,sbi-MIR168,zma-MIR168a,ata-MIR168,hvu-MIR168,vca-MIR168b,vca-MIR168a,sof-MIR168b,sof-MIR168a,ssp-MIR168a,mtr-MIR168c,gma-MIR168b,gma-MIR168a,ptc-MIR168a,ptc-MIR168b,ath-MIR168a,mdm-MIR168a,mdm-MIR168b,lja-MIR168,aly-MIR168a,ppe-MIR168,mes-MIR168a,vvi-MIR168,nta-MIR168d,nta-MIR168a,nta-MIR168e,nta-MIR168c,nta-MIR168b,csi-MIR168,lus-MIR168b,cme-MIR168,sly-MIR168b,…	osa-MIR168a	cgcctcgggcTCGCTTGGTGCAGATCGGGACccgccgccgccgctgccggggccgGATCCCGCCTTGCACCAAGTGAATcggagccg	osa-miR168a-3p	GATCCCGCCTTGCACCAAGTGAAT	3'	Diff	gp2a	...(((((((((((..(((((((((..((((((((.....(((......))).....)).))))))..)))))))))..)))))))))))...	87	55.9	-45.4	0.9	2511	193.5	510	107.5	587.5	358	659	2096.5	35	2141	4406.5	146.5	944.855	457.818	488.537	486.178	414.547	478.135	451.385	1278.98	170.403	1171.07	1509.33	167.246	high
52	63	osa-miR168a-3p_L-3_1ss19GC	CCCGCCTTGCACCAACTGAAT	21	chr6	+	102990370	102990462	gccgcctctgattcccttggtgcagatcgggaacgtcttcgatctcgatatctgctccgattCCCGCCTTGCACCAACTGAATcggaggccga	39	aof-MIR168b,osa-MIR168a,bdi-MIR168,sbi-MIR168,zma-MIR168a,ata-MIR168,hvu-MIR168,vca-MIR168b,vca-MIR168a,sof-MIR168b,sof-MIR168a,ssp-MIR168a,mtr-MIR168c,gma-MIR168b,gma-MIR168a,ptc-MIR168a,ptc-MIR168b,ath-MIR168a,mdm-MIR168a,mdm-MIR168b,lja-MIR168,aly-MIR168a,ppe-MIR168,mes-MIR168a,vvi-MIR168,nta-MIR168a,nta-MIR168d,nta-MIR168e,nta-MIR168c,nta-MIR168b,csi-MIR168,lus-MIR168b,cme-MIR168,sly-MIR168b,…	osa-MIR168a	cgcctcgggcTCGCTTGGTGCAGATCGGGACccgccgccgccgctgccggggccgGATCCCGCCTTGCACCAAGTGAATcggagccg	osa-miR168a-3p	GATCCCGCCTTGCACCAAGTGAAT	3'	Diff	gp2a	...(((((((((((..(((((((((..((((((((.....(((......))).....)).))))))..)))))))))..)))))))))))...	87	58.1	-44.4	0.8	2511	193.5	510	107.5	587.5	358	659	2096.5	35	2141	4406.5	146.5	944.855	457.818	488.537	486.178	414.547	478.135	451.385	1278.98	170.403	1171.07	1509.33	167.246	high
53	64	mdm-miR169o_1ss20TA	TAGCCAGGGATGACTTGCCA	20	chr2	-	19597327	19597481	aagagcctatctttgtTAGCCAAGGATGACTTGCCAataacctcttagtagttcatgtacttggtggtttgagattaacccatactagaaacttcttggtgatctatgtgggctcataggCAAGTTATCCTTGGCTATGCTaagtggcttttatc	3	mtr-MIR169a,mdm-MIR169o,bna-MIR169a,	mdm-MIR169o	taaaattcagaggaagagaagtcttgtatgaaggtgaagagccatgtttggTAGCCAGGGATGACTTGCCTaattagatctcatatgtgcaaaagttactgacaagttaacgcttgagcctatatatattaggatttctagrtaagcaagttgtccttcggcttgtctgactggctcttatctttcatgctagactttcctctcttccatgcat	mdm-miR169o	TAGCCAGGGATGACTTGCCT	5'	Diff	gp2a	(((((((...(((.(((((((((((((((((((((...((((.(..((((.......))))..).))))((((.....((((((.((((.(((....)))..))))))))))))))..))))))))))))))))))).)).))).)))))))...	152	40.6	-65.6	1	9.5	0	5	0	5	3	0	4	0	0	13.5	0	3.57472	0	4.78958	0	3.52806	4.00672	0	2.44021	0	0	4.62408	0	low
53	65	mtr-MIR169a-p3_2ss7GA20TC	CAAGTTATCCTTGGCTATGCT	21	chr2	-	19597327	19597481	aagagcctatctttgtTAGCCAAGGATGACTTGCCAataacctcttagtagttcatgtacttggtggtttgagattaacccatactagaaacttcttggtgatctatgtgggctcataggCAAGTTATCCTTGGCTATGCTaagtggcttttatc	3	mtr-MIR169a,mdm-MIR169o,bna-MIR169a,	mtr-MIR169a	aagaggcagagagagtaatgCAGCCAAGGATGACTTGCCGAcaacattggcgaatgttcatgtgatttctgcctcattgtgccggcaagttgtccttggctatgttagtctctcatcttct	mtr-MIR169a-p3	caagttgtccttggctatgtt	3'	New	gp2a	(((((((...(((.(((((((((((((((((((((...((((.(..((((.......))))..).))))((((.....((((((.((((.(((....)))..))))))))))))))..))))))))))))))))))).)).))).)))))))...	152	40.6	-65.6	1	383	5	10	0	8	0	82	32	0	5	70	40	144.118	11.8299	9.57916	0	5.6449	0	56.1663	19.5217	0	2.73488	23.9767	45.6644	middle
54	64	mdm-miR169o_1ss20TA	TAGCCAGGGATGACTTGCCA	20	chr1	+	453932323	453932518	cggcataaactagagagagggagaggccttacatgaagataagagcctatctttgtTAGCCAGGGATGACTTGCCAatcacctctgtagttcatgtactttggtgatctatgcaggttcataggcaagtttccctggctaggctaagtggtttttatccatcatgccaggcttactctcttctgtcgtgatcgtga	1	mdm-MIR169o,	mdm-MIR169o	taaaattcagaggaagagaagtcttgtatgaaggtgaagagccatgtttggTAGCCAGGGATGACTTGCCTaattagatctcatatgtgcaaaagttactgacaagttaacgcttgagcctatatatattaggatttctagrtaagcaagttgtccttcggcttgtctgactggctcttatctttcatgctagactttcctctcttccatgcat	mdm-miR169o	TAGCCAGGGATGACTTGCCT	5'	Diff	gp2a	...(((......((.((((((((((((((..(((((.((((((((((...(((.((((((((((((.((((((((.((.((((..((((.((((........)))).))))..))))..)).))))))))))))))))))).).))).))))))))))..)))))..)))))).))).))))).))......))).	192	45.9	-83.8	0.9	9.5	0	5	0	5	3	0	4	0	0	13.5	0	3.57472	0	4.78958	0	3.52806	4.00672	0	2.44021	0	0	4.62408	0	low
55	66	osa-miR169a	CAGCCAAGGATGACTTGCCGA	21	chr9	-	25194838	25195020	cattcatctgtggctttacatggagtatcaggaagtatggtgCAGCCAAGGATGACTTGCCGActccttattcgagtttgatcttattttgatcctcttagttatacgatcgaagtcagaagctagTGGGCAAGTTGTCTTTGGCTACatcctgcttcctagctttccatgctaggcctgtga	48	osa-MIR169a,osa-MIR169c,bdi-MIR169a,bdi-MIR169c,sbi-MIR169a,sbi-MIR169k,zma-MIR169b,zma-MIR169a,zma-MIR169c,ata-MIR169g,ata-MIR169e,ata-MIR169f,ata-MIR169d,mtr-MIR169a,gma-MIR169b,ptc-MIR169b,ptc-MIR169a,ptc-MIR169c,ptc-MIR169v,ath-MIR169a,stu-MIR169e,aly-MIR169a,mes-MIR169g,vvi-MIR169f,vvi-MIR169g,nta-MIR169b,nta-MIR169e,nta-MIR169g,nta-MIR169j,nta-MIR169p,nta-MIR169f,nta-MIR169o,nta-MIR169c,nta…	osa-MIR169a	cgccggcggcctgacattgggatcggaggccatggtgCAGCCAAGGATGACTTGCCGAtcgatcgatctatctatgaagctaagctagctggccatggatccatccatcaattggcaagttgttcttggctacatcttggcccctgctcctcatgtaaggccggcctgtggcg	osa-miR169a	CAGCCAAGGATGACTTGCCGA	5'	Yes	gp2a	...((((....(((((..(((((((....((((((((.((((.(((((((((..(((((((.(((.....(((((.(((((((.(((.((((.....))))..))).))))))).)).)))...))).)))))))..))))))))).)))).))))))))....)))))))..))))).))))	180	44.8	-81.2	1	12	0	0	0	0	0	12	7	0	0	0	0	4.51544	0	0	0	0	0	8.21946	4.27037	0	0	0	0	low
55	67	ata-miR169d-3p_L+2R-1_1ss14CT	TGGGCAAGTTGTCTTTGGCTAC	22	chr9	-	25194838	25195020	cattcatctgtggctttacatggagtatcaggaagtatggtgCAGCCAAGGATGACTTGCCGActccttattcgagtttgatcttattttgatcctcttagttatacgatcgaagtcagaagctagTGGGCAAGTTGTCTTTGGCTACatcctgcttcctagctttccatgctaggcctgtga	48	osa-MIR169a,osa-MIR169c,bdi-MIR169a,bdi-MIR169c,sbi-MIR169a,sbi-MIR169k,zma-MIR169b,zma-MIR169a,zma-MIR169c,ata-MIR169g,ata-MIR169e,ata-MIR169f,ata-MIR169d,mtr-MIR169a,gma-MIR169b,ptc-MIR169b,ptc-MIR169a,ptc-MIR169c,ptc-MIR169v,ath-MIR169a,stu-MIR169e,aly-MIR169a,mes-MIR169g,vvi-MIR169f,vvi-MIR169g,nta-MIR169b,nta-MIR169e,nta-MIR169g,nta-MIR169j,nta-MIR169p,nta-MIR169f,nta-MIR169o,nta-MIR169c,nta…	ata-MIR169d	gaacgggatgCAGCCAAGGATGACTTGCCGGctcctggtgttgggagttcactgagctttagagttagccGGCAAGTTGTCCTTGGCTACAcctagttctc	ata-miR169d-3p	GGCAAGTTGTCCTTGGCTACA	3'	Diff	gp2a	...((((....(((((..(((((((....((((((((.((((.(((((((((..(((((((.(((.....(((((.(((((((.(((.((((.....))))..))).))))))).)).)))...))).)))))))..))))))))).)))).))))))))....)))))))..))))).))))	180	44.8	-81.2	1	5	0	0	0	0	0	0	8	0	0	0	0	1.88143	0	0	0	0	0	0	4.88043	0	0	0	0	low
56	68	osa-miR169e_2ss13AG21GA	TAGCCAAGGATGGCTTGCCGA	21	chr10	-	178180651	178180830	tttctcattggctcttacatgaagatgaagagagtggaatgTAGCCAAGGATGGCTTGCCGAaatatgtaatgaaactggcctaaagaaaaggagagagattaattgcttaacctgttcagcaagttgtccttggctaacacttggctctcttctattcatgcaaagccgtaatgagtac	51	aof-MIR169c,osa-MIR169e,osa-MIR169f,osa-MIR1430,osa-MIR169g,bdi-MIR169b,bdi-MIR169m,bdi-MIR169n,bdi-MIR169h,sbi-MIR169e,sbi-MIR169j,sbi-MIR169d,sbi-MIR169q,sbi-MIR169m,sbi-MIR169p,sbi-MIR169n,sbi-MIR169c,sbi-MIR169h,zma-MIR169p,zma-MIR169q,zma-MIR169m,zma-MIR169n,zma-MIR169g,zma-MIR169f,zma-MIR169h,ata-MIR169h,ata-MIR169c,far-MIR169,ssp-MIR169,ptc-MIR169w,ptc-MIR169r,ptc-MIR169v,stu-MIR169h,stu-M…	osa-MIR169e	gctggttgtgTAGCCAAGGATGACTTGCCGGcctggtttgtgttcatcagcaatccagcatatgctgtattgccgtgtgtgatcgatcgatgcatggaccggcaagttattttctttggctacattacaacc	osa-miR169e	TAGCCAAGGATGACTTGCCGG	5'	Diff	gp2a	...((((((((((.((.((((((...(((((((((..(.((((((((((((..((((((.(((....(((((....((..(((.......)))..))......)))))........))).))))))..)))))))))).)).)..)))))))))..)))))).)))))))..)))))...	174	41.1	-72.6	1	0	0	0	0	0	0	3	0	0	0	3	0	0	0	0	0	0	0	2.05486	0	0	0	1.02757	0	low
57	68	osa-miR169e_2ss13AG21GA	TAGCCAAGGATGGCTTGCCGA	21	chr8	-	192092167	192092313	ttacatgaagaggaagatattggaatgTAGCCAAGGATGGCTTGCCGAaacgaaattggcctgaaagaaaaggagaggttaattgcttaattaacctgttcggcaggttgtccttggcaaacacttggctctcttctattcatgcaa	51	aof-MIR169c,osa-MIR169e,osa-MIR169g,osa-MIR1430,osa-MIR169f,bdi-MIR169m,bdi-MIR169b,bdi-MIR169h,bdi-MIR169n,sbi-MIR169j,sbi-MIR169e,sbi-MIR169h,sbi-MIR169c,sbi-MIR169n,sbi-MIR169p,sbi-MIR169m,sbi-MIR169q,sbi-MIR169d,zma-MIR169p,zma-MIR169h,zma-MIR169f,zma-MIR169g,zma-MIR169n,zma-MIR169m,zma-MIR169q,ata-MIR169h,ata-MIR169c,far-MIR169,ssp-MIR169,ptc-MIR169v,ptc-MIR169r,ptc-MIR169w,stu-MIR169e,stu-M…	osa-MIR169e	gctggttgtgTAGCCAAGGATGACTTGCCGGcctggtttgtgttcatcagcaatccagcatatgctgtattgccgtgtgtgatcgatcgatgcatggaccggcaagttattttctttggctacattacaacc	osa-miR169e	TAGCCAAGGATGACTTGCCGG	5'	Diff	gp2a	...((((((..((((((.....((.(((.((((((((..((((((((((..........(((........)))..(((((((((....))))))))).))))))))))..))))))))..))).)).....)))))).))))))...	141	42.2	-59.8	1	0	0	0	0	0	0	3	0	0	0	3	0	0	0	0	0	0	0	2.05486	0	0	0	1.02757	0	low
58	69	mtr-miR169d-5p_L+1R-1_1ss7AG	GAAGCCGAGGATGACTTGCCG	21	chr3	+	286373000	286373166	tgctcgtgggagagccttacctgaggtgggagagagaggggaatGAAGCCGAGGATGACTTGCCGccattcacaaataagaaggtaacctaagttgcaattaccggcaagtctttccttggctttgtttggctctcttttagctcatgtaaggctttcacatgactt	4	mtr-MIR169d,gma-MIR169w,gma-MIR169c,gma-MIR169s,	mtr-MIR169d	agatgAAGCCAAGGATGACTTGCCGGtataatagtaatttgccacaaatctagatagctattagctatgtttggatgggcggtgagattaacaaaattacagcagcattgtgattttgttgatgctttaaagtgtagtttttatcaaaattacagtggttcactgtaattatgagaatctcaccgtcaatctaaatatgcatttagtttcatttccGGCAGGTCATCCTTCGGCTATAtt	mtr-miR169d-5p	AAGCCAAGGATGACTTGCCGG	5'	Diff	gp2a	...(((((.(((((((((((.((((.(..(((((((....(((..((((((((((.(((((((((...(((........))).(((((....)))))......)))))))))..))))))))))..)))..)))))))..).)))).))))))))))).)))))...	161	47.9	-85.6	1.1	3	0	0	0	7	0	0	0	0	0	9.5	0	1.12886	0	0	0	4.93928	0	0	0	0	0	3.25398	0	low
59	69	mtr-miR169d-5p_L+1R-1_1ss7AG	GAAGCCGAGGATGACTTGCCG	21	unanchor299	+	671940	672106	tgctcgtgggagagccttacctgaggtgggagagagaggggaatGAAGCCGAGGATGACTTGCCGccattcacaaataagaaggtaacctaagttgcaattaccggcaagtctttccttggctttgtttggctctcttttagctcatgtaaggctttcacatgactg	4	mtr-MIR169d,gma-MIR169s,gma-MIR169w,gma-MIR169c,	mtr-MIR169d	agatgAAGCCAAGGATGACTTGCCGGtataatagtaatttgccacaaatctagatagctattagctatgtttggatgggcggtgagattaacaaaattacagcagcattgtgattttgttgatgctttaaagtgtagtttttatcaaaattacagtggttcactgtaattatgagaatctcaccgtcaatctaaatatgcatttagtttcatttccGGCAGGTCATCCTTCGGCTATAtt	mtr-miR169d-5p	AAGCCAAGGATGACTTGCCGG	5'	Diff	gp2a	...(((((.(((((((((((.((((.(..(((((((....(((..((((((((((.(((((((((...(((........))).(((((....)))))......)))))))))..))))))))))..)))..)))))))..).)))).))))))))))).)))))...	161	48.5	-85.6	1.1	3	0	0	0	7	0	0	0	0	0	9.5	0	1.12886	0	0	0	4.93928	0	0	0	0	0	3.25398	0	low
60	70	ath-miR170-3p	TGATTGAGCCGTGTCAATATC	21	chr10	+	196312746	196312886	tattgaaatagctattgtgatgttggcccggttcaaatcagatactgctagccaaggctaatttatacgaaagagtatttcaggcctctgactgtgttgtattTGATTGAGCCGTGTCAATATCttagtactttttcattc	5	ath-MIR170,stu-MIR171c,aly-MIR170,sly-MIR171f,cas-MIR170,	ath-MIR170	cgagagagtccctctgaTATTGGCCTGGTTCACTCAGAttctcttttactaactcatcTGATTGAGCCGTGTCAATATCtcagtcctctctcg	ath-miR170-3p	TGATTGAGCCGTGTCAATATC	3'	Yes	gp2a	...(((((.((.((((..(((((((((.((((((.((((((((((..((((.(((((((.....((((......))))....))))).)).))).)..)))))))))))))))).)))))))))..)))))).)))))...	135	37.6	-52.2	1	435.5	76.5	173	0	0	0	349.5	44	30	0	5	0	163.873	180.998	165.719	0	0	0	239.392	26.8423	146.059	0	1.71262	0	middle
61	71	aof-MIR171c-p5_1ss11GA	AGGTATTGGCATGTCTCAATT	21	chr7	+	279071376	279071526	tacttgaagggtttataagcaagctgagatataatccggAGGTATTGGCATGTCTCAATTtaaaggcatggttggatatacgatcaggaacagccatgtaattggaTTGAGCCGCGTCAATATCTCCtagctagcttccacccctcaaaca	25	aof-MIR171c,osa-MIR171i,sbi-MIR171h,zma-MIR171l,zma-MIR171m,mtr-MIR171b,gma-MIR171m,gma-MIR171t,gma-MIR171p,gma-MIR171n,mdm-MIR171p,mdm-MIR171a,mdm-MIR171b,lja-MIR171b,stu-MIR171b,ppe-MIR171h,mes-MIR171a,vvi-MIR171b,csi-MIR171e,csi-MIR171g,lus-MIR171j,lus-MIR171g,lus-MIR171d,cme-MIR171h,sly-MIR171e,	aof-MIR171c	atcgaagagtgtttgatagaagaggaggtattggcgtgtctcaatttaaggacgtggttggatattgtcaacagctatgtaatttgaTTGAGCCGCGTCAATATCTCCttgtgcttcaagcactcaaacgaat	aof-MIR171c-p5	aggtattggcgtgtctcaatt	5'	New	gp2a	...((((.((((....((((.(((((...........((((((((((((..(.((((((..((..(((((((((................)))))))))..))..)))))).)..))))))))))))))))).))))..)))).))))...	145	43	-58	0.9	0	0	0	0	0	0	0	0	0	0	6	0	0	0	0	0	0	0	0	0	0	0	2.05514	0	low
61	72	aof-miR171c	TTGAGCCGCGTCAATATCTCC	21	chr7	+	279071376	279071526	tacttgaagggtttataagcaagctgagatataatccggAGGTATTGGCATGTCTCAATTtaaaggcatggttggatatacgatcaggaacagccatgtaattggaTTGAGCCGCGTCAATATCTCCtagctagcttccacccctcaaaca	25	aof-MIR171c,osa-MIR171i,sbi-MIR171h,zma-MIR171l,zma-MIR171m,mtr-MIR171b,gma-MIR171m,gma-MIR171t,gma-MIR171p,gma-MIR171n,mdm-MIR171p,mdm-MIR171a,mdm-MIR171b,lja-MIR171b,stu-MIR171b,ppe-MIR171h,mes-MIR171a,vvi-MIR171b,csi-MIR171e,csi-MIR171g,lus-MIR171j,lus-MIR171g,lus-MIR171d,cme-MIR171h,sly-MIR171e,	aof-MIR171c	atcgaagagtgtttgatagaagaggaggtattggcgtgtctcaatttaaggacgtggttggatattgtcaacagctatgtaatttgaTTGAGCCGCGTCAATATCTCCttgtgcttcaagcactcaaacgaat	aof-miR171c	TTGAGCCGCGTCAATATCTCC	3'	Yes	gp2a	...((((.((((....((((.(((((...........((((((((((((..(.((((((..((..(((((((((................)))))))))..))..)))))).)..))))))))))))))))).))))..)))).))))...	145	43	-58	0.9	2611.5	268	978.5	89	675.5	344.5	2152	1244.5	135	451.5	631.5	119	982.672	634.084	937.321	402.51	476.641	460.105	1474.02	759.211	657.267	246.959	216.304	135.852	high
62	72	aof-miR171c	TTGAGCCGCGTCAATATCTCC	21	chr3	+	201815412	201815534	acaagttagaccgaggaggaggtattgatacgtctcaatttaaagacatggttggatatttcagaaacacccatgaaatttgaTTGAGCCGCGTCAATATCTCCttccaacctcaaaactaaa	25	aof-MIR171c,osa-MIR171i,sbi-MIR171h,zma-MIR171m,zma-MIR171l,mtr-MIR171b,gma-MIR171t,gma-MIR171m,gma-MIR171n,gma-MIR171p,mdm-MIR171p,mdm-MIR171a,mdm-MIR171b,lja-MIR171b,stu-MIR171b,ppe-MIR171h,mes-MIR171a,vvi-MIR171b,csi-MIR171e,csi-MIR171g,lus-MIR171d,lus-MIR171g,lus-MIR171j,cme-MIR171h,sly-MIR171e,	aof-MIR171c	atcgaagagtgtttgatagaagaggaggtattggcgtgtctcaatttaaggacgtggttggatattgtcaacagctatgtaatttgaTTGAGCCGCGTCAATATCTCCttgtgcttcaagcactcaaacgaat	aof-miR171c	TTGAGCCGCGTCAATATCTCC	3'	Yes	gp2a	.....((((...((((((((((((((((..((.(((((((......(((((.((.............)).)))))......))))))).))..)))))))))))).....))))....)))).	117	39	-40.7	0.8	2611.5	268	978.5	89	675.5	344.5	2152	1244.5	135	451.5	631.5	119	982.672	634.084	937.321	402.51	476.641	460.105	1474.02	759.211	657.267	246.959	216.304	135.852	high
63	73	osa-MIR171g-p3_1	TGAGCCGAGCCAATATCACTT	21	chr3	+	324702836	324702961	gttggggagatgacatgatattggttgggctcagccgttgtgatcagaatcatcagatgactcggaaagagtttatattgagaaacgagacgcTGAGCCGAGCCAATATCACTTcttctcttcaca	3	osa-MIR171g,sbi-MIR171c,zma-MIR171g,	osa-MIR171g	gacatggcatggtattgacttggctcatctcagcaacagcaaactgcatgcagcgctgGAGGTGAGCCGAGCCAATATCacttcatgtc	osa-MIR171g-p3	TGAGCCGAGCCAATATCactt	3'	New	gp2a	..((..((((.((..(((((((((((.((((((((.(((..........(((......(((((.....))))).....))).......))))))))))).)))))))))))..)).))))..))..	122	45.2	-53.9	0.9	2.5	0	0	0	6.5	0	0	0	0	5	3.5	10.5	0.940716	0	0	0	4.58648	0	0	0	0	2.73488	1.19883	11.9869	middle
64	73	osa-MIR171g-p3_1	TGAGCCGAGCCAATATCACTT	21	chr3	+	324721808	324721951	ggaatgcagttggggagatgacatgatattggttgggctcagccgttgtgatcagaatcatcagatgactcggaaagagtttatattgagaaacgagacgcTGAGCCGAGCCAATATCACTTcttctcttcacaactgcatgca	3	osa-MIR171g,sbi-MIR171c,zma-MIR171g,	osa-MIR171g	gacatggcatggtattgacttggctcatctcagcaacagcaaactgcatgcagcgctgGAGGTGAGCCGAGCCAATATCacttcatgtc	osa-MIR171g-p3	TGAGCCGAGCCAATATCactt	3'	New	gp2a	...(((((((((..((((.((..(((((((((((.((((((((.(((..........(((......(((((.....))))).....))).......))))))))))).)))))))))))..)).))))..))..)))))))...	138	45.8	-63.5	1	2.5	0	0	0	6.5	0	0	0	0	5	3.5	10.5	0.940716	0	0	0	4.58648	0	0	0	0	2.73488	1.19883	11.9869	middle
65	74	osa-MIR171g-p3_2	TGAGCCGAGCCAATATCACTTC	22	chr3	+	324813997	324814140	ggaatgcagttggggagatgacatgatattggttgggctcagccgttgtgatcagaatcatcagatgactcggaaagagtttatattgagaaacgagacacTGAGCCGAGCCAATATCACTTCttctcttcacaactgcatgca	3	osa-MIR171g,sbi-MIR171c,zma-MIR171g,	osa-MIR171g	gacatggcatggtattgacttggctcatctcagcaacagcaaactgcatgcagcgctgGAGGTGAGCCGAGCCAATATCacttcatgtc	osa-MIR171g-p3	TGAGCCGAGCCAATATCacttc	3'	New	gp2a	...(((((((((..((((.((..(((((((((((.((((((((((..((.(((.((....)).))).)).))).....((((........))))......))))))).)))))))))))..)).))))..))..)))))))...	138	45.1	-60.1	0.9	2.5	0	0	0	6.5	0	0	0	0	5	3.5	10.5	0.940716	0	0	0	4.58648	0	0	0	0	2.73488	1.19883	11.9869	middle
66	74	osa-MIR171g-p3_2	TGAGCCGAGCCAATATCACTTC	22	chr3	+	324863300	324863427	cgttggggagatgacatgatattggttgggctcagccgttgtgatcagaatcatcagatgactcggaaagagtttatattgagaaacgagacgcTGAGCCGAGCCAATATCACTTCttctcttcacaa	3	osa-MIR171g,sbi-MIR171c,zma-MIR171g,	osa-MIR171g	gacatggcatggtattgacttggctcatctcagcaacagcaaactgcatgcagcgctgGAGGTGAGCCGAGCCAATATCacttcatgtc	osa-MIR171g-p3	TGAGCCGAGCCAATATCacttc	3'	New	gp2a	...((..((((.((..(((((((((((.((((((((.(((..........(((......(((((.....))))).....))).......))))))))))).)))))))))))..)).))))..))...	122	45.3	-53.9	0.9	2.5	0	0	0	6.5	0	0	0	0	5	3.5	10.5	0.940716	0	0	0	4.58648	0	0	0	0	2.73488	1.19883	11.9869	middle
67	75	mes-miR171l_2ss9AG21CT	CGAGCCGAGCCAATATCACTT	21	chr3	-	14023073	14023227	ttcacagatagggaatgtagttggggagatgacatgatattggttgggctcagccattgtgagcagatgactcggaaagagtttattttgagaaatgagacgcTGAGCCGAGCCAATATCACTTcttctcttcacaactgcagctagtttgtttg	5	osa-MIR171g,sbi-MIR171c,zma-MIR171g,mes-MIR171l,vvi-MIR479,	mes-MIR171l	gaagtagacacggcgtgatattggcacggctcatcttctactggatcttccataactagccaggatccatttcttgataaaatgaagaagaagacgaCGAGCCGAACCAATATCACTCttgtatgctt	mes-miR171l	CGAGCCGAACCAATATCACTC	3'	Diff	gp2a	...((((((..((..((((((((..((((.((..(((((((((((.((((((((..(..(...((((.(((((.....)))))...))))....)..)...)))))))).)))))))))))..)).))))..))..)))))).)).))))))...	149	43.9	-63.6	0.9	0	0	0	6	191	113	0	0	0	80	39	27	0	0	0	27.1355	134.772	150.92	0	0	0	43.758	13.3584	30.8235	middle
68	76	aof-miR171c_2ss10GA21CA	TTGAGCCGCATCAATATCTCA	21	chr7	-	34015627	34015735	atcgagaaggaggtattgatgtgtctcaatttaaagacatggttggatattctgaaacagccatgtaatttgaTTGAGCCGCATCAATATCTCAcactatcttctcatg	26	aof-MIR171c,osa-MIR171i,sbi-MIR171h,zma-MIR171l,zma-MIR171m,mtr-MIR171b,gma-MIR171m,gma-MIR171t,gma-MIR171p,gma-MIR171n,mdm-MIR171a,mdm-MIR171p,mdm-MIR171b,lja-MIR171b,stu-MIR171b,ppe-MIR171h,mes-MIR171a,vvi-MIR171b,csi-MIR171e,csi-MIR171g,lus-MIR171j,lus-MIR171d,lus-MIR171g,cme-MIR171h,sly-MIR171e,cca-MIR171,	aof-MIR171c	atcgaagagtgtttgatagaagaggaggtattggcgtgtctcaatttaaggacgtggttggatattgtcaacagctatgtaatttgaTTGAGCCGCGTCAATATCTCCttgtgcttcaagcactcaaacgaat	aof-miR171c	TTGAGCCGCGTCAATATCTCC	3'	Diff	gp2a	...((((((((((((((((((((.(((((((.....(((((((((............))))))))).....))))))).)))))))))))))).......))))))...	103	37.6	-48.4	1.2	258	40.5	62	0	28.5	9	234.5	171	13	25	27	5	97.0819	95.8225	59.3908	0	20.1099	12.0202	160.622	104.319	63.2924	13.6744	9.24815	5.70805	middle
69	77	aof-miR171a	TGATTGAGCCGTGCCAATATC	21	chr8	+	216094272	216094412	tattgaaatagctactgtgatgttggcccggttcaaatcagatactactagcaagagacaaatttatactgaatgtatttcaggccttagatcatgttgtattTGATTGAGCCGTGCCAATATCttagtactttttcattc	129	aof-MIR171a,osa-MIR171b,osa-MIR171e,osa-MIR171d,osa-MIR171c,osa-MIR171f,bdi-MIR171e,bdi-MIR171c,bdi-MIR171d,bdi-MIR171b,sbi-MIR171a,sbi-MIR171k,sbi-MIR171b,sbi-MIR171i,sbi-MIR171d,zma-MIR171i,zma-MIR171f,zma-MIR171j,zma-MIR171d,zma-MIR171e,zma-MIR171b,zma-MIR171c,tae-MIR171a,tae-MIR171b,ata-MIR171b,ata-MIR171d,ata-MIR171c,hvu-MIR171,far-MIR171,mtr-MIR171d,mtr-MIR171f,mtr-MIR171a,mtr-MIR171c,gma-M…	aof-MIR171a	ttctccattgaaatagttactatgatgttggcccggttcattcagataccactagctaaggcacaaaagaaaagaaaaagtaatccttaagccttagatttgtgttttcTGATTGAGCCGTGCCAATATCttagtactctttcattctatctgca	aof-miR171a	TGATTGAGCCGTGCCAATATC	3'	Yes	gp2a	...(((((.((.((((..(((((((((.((((((.((((((((((...........((((.(((((..(((((.....)))))....)))))..)))))))))))))))))))).)))))))))..)))))).)))))...	135	35.5	-49.2	1	4193.5	706.5	1348.5	0	5	0	2884.5	697	313.5	0	0	0	1577.96	1671.57	1291.75	0	3.52806	0	1975.75	425.207	1526.32	0	0	0	high
70	77	aof-miR171a	TGATTGAGCCGTGCCAATATC	21	unanchor697	-	209256	209396	tattgaaatagctattgtgatgttggcccggttcaaatcagatactgctagccaaggctaatttatacgaaagagtatttcaggcctctgactgtgttgtattTGATTGAGCCGTGTCAATATCttagtactttttcattc	132	aof-MIR171a,osa-MIR171b,osa-MIR171e,osa-MIR171d,osa-MIR171f,osa-MIR171c,bdi-MIR171e,bdi-MIR171d,bdi-MIR171c,bdi-MIR171b,sbi-MIR171k,sbi-MIR171a,sbi-MIR171i,sbi-MIR171b,sbi-MIR171d,zma-MIR171i,zma-MIR171d,zma-MIR171e,zma-MIR171f,zma-MIR171j,zma-MIR171b,tae-MIR171a,tae-MIR171b,ata-MIR171b,ata-MIR171d,ata-MIR171c,hvu-MIR171,far-MIR171,mtr-MIR171f,mtr-MIR171d,mtr-MIR171c,gma-MIR171e,gma-MIR171o,gma-M…	aof-MIR171a	ttctccattgaaatagttactatgatgttggcccggttcattcagataccactagctaaggcacaaaagaaaagaaaaagtaatccttaagccttagatttgtgttttcTGATTGAGCCGTGCCAATATCttagtactctttcattctatctgca	aof-miR171a	TGATTGAGCCGTGCCAATATC	3'	Yes	gp2a	...(((((.((.((((..(((((((((.((((((.((((((((((..((((.(((((((.....((((......))))....))))).)).))).)..)))))))))))))))).)))))))))..)))))).)))))...	135	37.6	-52.2	1	4193.5	706.5	1348.5	0	5	0	2884.5	697	313.5	0	0	0	1577.96	1671.57	1291.75	0	3.52806	0	1975.75	425.207	1526.32	0	0	0	high
71	78	tae-miR171b_L-1R+1_1ss21GT	TGAGCCGTGCCAATATCACTC	21	chr8	-	174049271	174049365	aatgagcgatattggtgaggttcaatccgatgattgaatttacaaaatactcgtaaacagtcttctcagatTGAGCCGCGCCAATATCACTCtcc	17	bdi-MIR171e,tae-MIR171b,ata-MIR171c,ptc-MIR171h,ptc-MIR171g,ath-MIR171b,ath-MIR171c,aly-MIR171b,mes-MIR171g,mes-MIR171k,bra-MIR171b,bna-MIR171a,bra-MIR171d,bna-MIR171b,bra-MIR171c,bna-MIR171c,cas-MIR171b,	tae-MIR171b	tgagttaatcctgcgaggggagtgaacgcggtattggtgcggttcaatcagagagctggcgccccaggaggcaaggggttcctcccttcgaTTGAGCCGTGCCAATATCACGcggtttctcatgaatcgcatcctcct	tae-miR171b	TTGAGCCGTGCCAATATCACG	3'	Diff	gp2a	...(((.((((((((((.(((((((((.((.(((((..(((((.........))))))))))...)).))))))))).)))))))))).)))...	89	41.1	-39.8	1	0	0	0	13	63	62	0	0	0	89	43	24	0	0	0	58.7936	44.4536	82.8056	0	0	0	48.6808	14.7285	27.3986	middle
72	79	aof-miR171c_1ss2TG	TGGAGCCGCGTCAATATCTCC	21	chr9	-	114338809	114338906	atcaggaggtattggggtgtctcaatttaaaggcatggttggatatacgatcgagaacagccatgtaattggaTTGAGCCGCGTCAATATCTCCtagc	32	aof-MIR171c,osa-MIR171i,osa-MIR171a,bdi-MIR171a,sbi-MIR171h,zma-MIR171l,zma-MIR171m,mtr-MIR171b,gma-MIR171p,gma-MIR171n,gma-MIR171m,gma-MIR171t,ath-MIR171a,mdm-MIR171p,mdm-MIR171a,mdm-MIR171b,mdm-MIR171c,mdm-MIR171e,lja-MIR171b,stu-MIR171b,aly-MIR171a,ppe-MIR171h,mes-MIR171a,vvi-MIR171b,csi-MIR171e,csi-MIR171g,csi-MIR171c,cme-MIR171h,cme-MIR171e,sly-MIR171e,bra-MIR171e,bna-MIR171f,	aof-MIR171c	atcgaagagtgtttgatagaagaggaggtattggcgtgtctcaatttaaggacgtggttggatattgtcaacagctatgtaatttgaTTGAGCCGCGTCAATATCTCCttgtgcttcaagcactcaaacgaat	aof-miR171c	TTGAGCCGCGTCAATATCTCC	3'	Diff	gp2a	...(((((((((((..(((.((((((..((..(((((((((................)))))))))..))..)))))).)))..)))))))))))...	92	44.9	-43.7	1	200	3.5	2.5	0	8	0	35.5	9.5	0	7	0	0	75.2573	8.28095	2.39479	0	5.6449	0	24.3159	5.79551	0	3.82883	0	0	middle
73	79	aof-miR171c_1ss2TG	TGGAGCCGCGTCAATATCTCC	21	unanchor563	-	288919	289025	atacgatcaggaggtattggggtgtctcaatttaaaggcatggttggatatacgatcgagaacagccatgtaattggaTTGAGCCGCGTCAATATCTCCtagcgagc	32	aof-MIR171c,osa-MIR171i,osa-MIR171a,bdi-MIR171a,sbi-MIR171h,zma-MIR171l,zma-MIR171m,mtr-MIR171b,gma-MIR171t,gma-MIR171m,gma-MIR171p,gma-MIR171n,ath-MIR171a,mdm-MIR171b,mdm-MIR171p,mdm-MIR171a,mdm-MIR171e,mdm-MIR171c,lja-MIR171b,stu-MIR171b,aly-MIR171a,ppe-MIR171h,mes-MIR171a,vvi-MIR171b,csi-MIR171e,csi-MIR171g,csi-MIR171c,cme-MIR171h,cme-MIR171e,sly-MIR171e,bra-MIR171e,bna-MIR171f,	aof-MIR171c	atcgaagagtgtttgatagaagaggaggtattggcgtgtctcaatttaaggacgtggttggatattgtcaacagctatgtaatttgaTTGAGCCGCGTCAATATCTCCttgtgcttcaagcactcaaacgaat	aof-miR171c	TTGAGCCGCGTCAATATCTCC	3'	Diff	gp2a	...((...(((((((((((..(((.((((((..((..(((((((((................)))))))))..))..)))))).)))..)))))))))))..))...	101	45.8	-45	0.9	200	3.5	2.5	0	8	0	35.5	9.5	0	7	0	0	75.2573	8.28095	2.39479	0	5.6449	0	24.3159	5.79551	0	3.82883	0	0	middle
74	80	lja-miR171c_2ss8AG10TC	TGAGCCGGACCAATATCACTC	21	chr9	-	183816842	183816949	agaagaagaagaagacatgagtgattttggtatggctcatttcatttaggatttgtgcctagttgtataTGAGCCGGACCAATATCACTCaggtatgcttcttctgtt	7	lja-MIR171c,mes-MIR171l,vvi-MIR479,nta-MIR479a,cme-MIR171g,bra-MIR171b,bna-MIR171a,	lja-MIR171c	gcaaaagcagacatggcgtgatgttgatctggctcatatttaagtataagtgtatcttatcaacttcagaTGAGCCGAATCAATATCACTCttgtcttcttttttgc	lja-miR171c	TGAGCCGAATCAATATCACTC	3'	Diff	gp2a	...((((((((...((.((((((((.(((((..(((((((..((..((((.......))))..))...)))))))..))))).)))))))).))...))))))))...	102	38.9	-48.9	1.2	1091	128.5	447	306	1467.5	486.5	555	1277	15	7880	10782.5	194	410.529	304.029	428.188	1383.91	1035.49	649.757	380.15	779.038	73.0297	4310.16	3693.27	221.472	high
75	81	mtr-miR172c-5p_1ss9AT	GTAGCATCTTCAAGATTCACA	21	chr2	-	120605913	120606034	aacagtcggtgtttgcaggtGTAGCATCTTCAAGATTCACAaagattcaattgttgatcagacactcaatagtcatcaagatgAGAATCTTGATGATGCTGCATcggcaataagcgactcta	81	aof-MIR172,osa-MIR172d,osa-MIR172a,bdi-MIR172a,sbi-MIR172c,sbi-MIR172d,sbi-MIR172a,zma-MIR172a,zma-MIR172b,zma-MIR172d,zma-MIR172c,ata-MIR172b,vca-MIR172a,vca-MIR172b,egu-MIR172a,egu-MIR172c,egu-MIR172b,mtr-MIR172b,mtr-MIR172c,gma-MIR172h,gma-MIR172j,gma-MIR172f,gma-MIR172a,gma-MIR172b,gma-MIR172g,ptc-MIR172c,ptc-MIR172f,ptc-MIR172b,ptc-MIR172a,ath-MIR172b,ath-MIR172a,mdm-MIR172p,mdm-MIR172e,mdm-…	mtr-MIR172c	tatttgcagatGTAGCATCATCAAGATTCACAtatgaaagtgcaaatggttttgttggattttgatctgatcgatgcaaatctaagttctccataggtcttttgaactgAGAATCTTGATGATGCTGCATcagccataa	mtr-miR172c-5p	GTAGCATCATCAAGATTCACA	5'	Diff	gp2a	...(((((....((((.(((((((((((.(((((((((.((..(((...((((((((........)))))))).)))....)).))))))))).))))))))))).))))....)))))...	116	40.2	-47.6	1	7	0	0	0	0	0	0	2.5	0	0	0	3	2.63401	0	0	0	0	0	0	1.52513	0	0	0	3.42483	low
75	82	aof-miR172_1ss4AC	AGACTCTTGATGATGCTGCAT	21	chr2	-	120605913	120606034	aacagtcggtgtttgcaggtGTAGCATCTTCAAGATTCACAaagattcaattgttgatcagacactcaatagtcatcaagatgAGAATCTTGATGATGCTGCATcggcaataagcgactcta	81	aof-MIR172,osa-MIR172d,osa-MIR172a,bdi-MIR172a,sbi-MIR172c,sbi-MIR172d,sbi-MIR172a,zma-MIR172a,zma-MIR172b,zma-MIR172d,zma-MIR172c,ata-MIR172b,vca-MIR172a,vca-MIR172b,egu-MIR172a,egu-MIR172c,egu-MIR172b,mtr-MIR172b,mtr-MIR172c,gma-MIR172h,gma-MIR172j,gma-MIR172f,gma-MIR172a,gma-MIR172b,gma-MIR172g,ptc-MIR172c,ptc-MIR172f,ptc-MIR172b,ptc-MIR172a,ath-MIR172b,ath-MIR172a,mdm-MIR172p,mdm-MIR172e,mdm-…	aof-MIR172	ctgtttgcaggtgcagcatcttcaagattcacaatattattgagaggcctcctttgatttactcagggacttgAGAATCTTGATGATGCTGCATcagcaataag	aof-miR172	AGAATCTTGATGATGCTGCAT	3'	Diff	gp2a	...(((((....((((.(((((((((((.(((((((((.((..(((...((((((((........)))))))).)))....)).))))))))).))))))))))).))))....)))))...	116	40.2	-47.6	1	54	0	0	0	0	0	0	0	0	0	0	0	20.3195	0	0	0	0	0	0	0	0	0	0	0	middle
76	82	aof-miR172_1ss4AC	AGACTCTTGATGATGCTGCAT	21	chr2	-	268127333	268127469	accagtcattgtttgcaagtgtagcatcagcaagattcacatgggctggattttatcgatcaatttgttacacatctatgatatagttgtgacaattgAGAATCTTGATGATGCTGCATtggcaataaatggctttt	81	aof-MIR172,osa-MIR172a,osa-MIR172d,bdi-MIR172a,sbi-MIR172a,sbi-MIR172d,sbi-MIR172c,zma-MIR172a,zma-MIR172c,zma-MIR172d,zma-MIR172b,ata-MIR172b,vca-MIR172a,vca-MIR172b,egu-MIR172c,egu-MIR172a,egu-MIR172b,mtr-MIR172c,mtr-MIR172b,gma-MIR172a,gma-MIR172h,gma-MIR172j,gma-MIR172f,gma-MIR172g,gma-MIR172b,ptc-MIR172f,ptc-MIR172b,ptc-MIR172c,ptc-MIR172a,ath-MIR172b,ath-MIR172a,mdm-MIR172e,mdm-MIR172p,mdm-…	aof-MIR172	ctgtttgcaggtgcagcatcttcaagattcacaatattattgagaggcctcctttgatttactcagggacttgAGAATCTTGATGATGCTGCATcagcaataag	aof-miR172	AGAATCTTGATGATGCTGCAT	3'	Diff	gp2a	...(((((((..((((.((((((((((((.((((((((..((..(......)..))...((((((.((((((...((((...)))).)))))))))))))))))))).)))))))))))).))))..)))))))...	131	36.5	-50.9	1	54	0	0	0	0	0	0	0	0	0	0	0	20.3195	0	0	0	0	0	0	0	0	0	0	0	middle
77	83	cme-MIR172c-p5	GTAGCATCTTCAAGATTCAC	20	chr3	-	258035776	258035900	accagtcgttgtttgcaagtGTAGCATCTTCAAGATTCACatgggcatgggctagttttacattagtattgtggtgagaccacttgAGAATCTTGATGATGCTGCATTggcaataaatgactcct	65	aof-MIR172,osa-MIR172a,osa-MIR172d,bdi-MIR172a,ata-MIR172b,vca-MIR172b,vca-MIR172a,mtr-MIR172c,mtr-MIR172b,gma-MIR172g,gma-MIR172b,gma-MIR172a,gma-MIR172h,gma-MIR172j,gma-MIR172f,ptc-MIR172a,ptc-MIR172f,ptc-MIR172b,ptc-MIR172c,ath-MIR172a,ath-MIR172b,mdm-MIR172g,mdm-MIR172h,mdm-MIR172d,mdm-MIR172f,mdm-MIR172e,mdm-MIR172p,lja-MIR172c,lja-MIR172b,aly-MIR172a,aly-MIR172b,ppe-MIR172b,ppe-MIR172a,mes-…	cme-MIR172c	gcgggtgtagcatcttcaagattcacaacatatgcaaatattatcgaaataaaaataatatgatgctcaaaaatctcaacttgAGAATCTTGATGATGCTGCATcagcaatcaa	cme-MIR172c-p5	gtagcatcttcaagattcac	5'	New	gp2a	...(((((((..((((.(((((((((((.(((((((((.((.........((((((.....))))))...((((.....)))).)).))))))))).))))))))))).))))..)))))))...	119	41.6	-50.6	1	4.5	0	0	0	0	0	3	3	0	0	0	0	1.69329	0	0	0	0	0	2.05486	1.83016	0	0	0	0	low
77	84	aof-miR172_R+1	AGAATCTTGATGATGCTGCATA	22	chr3	-	258035776	258035900	accagtcgttgtttgcaagtGTAGCATCTTCAAGATTCACatgggcatgggctagttttacattagtattgtggtgagaccacttgAGAATCTTGATGATGCTGCATTggcaataaatgactcct	65	aof-MIR172,osa-MIR172a,osa-MIR172d,bdi-MIR172a,ata-MIR172b,vca-MIR172b,vca-MIR172a,mtr-MIR172c,mtr-MIR172b,gma-MIR172g,gma-MIR172b,gma-MIR172a,gma-MIR172h,gma-MIR172j,gma-MIR172f,ptc-MIR172a,ptc-MIR172f,ptc-MIR172b,ptc-MIR172c,ath-MIR172a,ath-MIR172b,mdm-MIR172g,mdm-MIR172h,mdm-MIR172d,mdm-MIR172f,mdm-MIR172e,mdm-MIR172p,lja-MIR172c,lja-MIR172b,aly-MIR172a,aly-MIR172b,ppe-MIR172b,ppe-MIR172a,mes-…	aof-MIR172	ctgtttgcaggtgcagcatcttcaagattcacaatattattgagaggcctcctttgatttactcagggacttgAGAATCTTGATGATGCTGCATcagcaataag	aof-miR172	AGAATCTTGATGATGCTGCAT	3'	Diff	gp2a	...(((((((..((((.(((((((((((.(((((((((.((.........((((((.....))))))...((((.....)))).)).))))))))).))))))))))).))))..)))))))...	119	41.6	-50.6	1	0	2.5	0	0	0	0	0	0	0	0	0	0	0	5.91497	0	0	0	0	0	0	0	0	0	0	low
78	83	cme-MIR172c-p5	GTAGCATCTTCAAGATTCAC	20	unanchor288	-	290457	290581	accagtcgttgtttgcaagtGTAGCATCTTCAAGATTCACatgggcatgggctagttttacattagtattgtggtgagaccacttgAGAATCTTGATGATGCTGCATTggcaataaatgactcct	65	aof-MIR172,osa-MIR172d,osa-MIR172a,bdi-MIR172a,ata-MIR172b,vca-MIR172a,vca-MIR172b,mtr-MIR172c,mtr-MIR172b,gma-MIR172g,gma-MIR172b,gma-MIR172a,gma-MIR172h,gma-MIR172j,gma-MIR172f,ptc-MIR172a,ptc-MIR172f,ptc-MIR172b,ptc-MIR172c,ath-MIR172a,ath-MIR172b,mdm-MIR172g,mdm-MIR172h,mdm-MIR172d,mdm-MIR172f,mdm-MIR172p,mdm-MIR172e,lja-MIR172c,lja-MIR172b,aly-MIR172a,aly-MIR172b,ppe-MIR172a,ppe-MIR172b,mes-…	cme-MIR172c	gcgggtgtagcatcttcaagattcacaacatatgcaaatattatcgaaataaaaataatatgatgctcaaaaatctcaacttgAGAATCTTGATGATGCTGCATcagcaatcaa	cme-MIR172c-p5	gtagcatcttcaagattcac	5'	New	gp2a	...(((((((..((((.(((((((((((.(((((((((.((.........((((((.....))))))...((((.....)))).)).))))))))).))))))))))).))))..)))))))...	119	41.6	-50.6	1	4.5	0	0	0	0	0	3	3	0	0	0	0	1.69329	0	0	0	0	0	2.05486	1.83016	0	0	0	0	low
78	84	aof-miR172_R+1	AGAATCTTGATGATGCTGCATA	22	unanchor288	-	290457	290581	accagtcgttgtttgcaagtGTAGCATCTTCAAGATTCACatgggcatgggctagttttacattagtattgtggtgagaccacttgAGAATCTTGATGATGCTGCATTggcaataaatgactcct	65	aof-MIR172,osa-MIR172d,osa-MIR172a,bdi-MIR172a,ata-MIR172b,vca-MIR172a,vca-MIR172b,mtr-MIR172c,mtr-MIR172b,gma-MIR172g,gma-MIR172b,gma-MIR172a,gma-MIR172h,gma-MIR172j,gma-MIR172f,ptc-MIR172a,ptc-MIR172f,ptc-MIR172b,ptc-MIR172c,ath-MIR172a,ath-MIR172b,mdm-MIR172g,mdm-MIR172h,mdm-MIR172d,mdm-MIR172f,mdm-MIR172p,mdm-MIR172e,lja-MIR172c,lja-MIR172b,aly-MIR172a,aly-MIR172b,ppe-MIR172a,ppe-MIR172b,mes-…	aof-MIR172	ctgtttgcaggtgcagcatcttcaagattcacaatattattgagaggcctcctttgatttactcagggacttgAGAATCTTGATGATGCTGCATcagcaataag	aof-miR172	AGAATCTTGATGATGCTGCAT	3'	Diff	gp2a	...(((((((..((((.(((((((((((.(((((((((.((.........((((((.....))))))...((((.....)))).)).))))))))).))))))))))).))))..)))))))...	119	41.6	-50.6	1	0	2.5	0	0	0	0	0	0	0	0	0	0	0	5.91497	0	0	0	0	0	0	0	0	0	0	low
79	85	ata-miR172c-5p_R-2_1ss7TC	GTGGCACCATCAAGATTCACA	21	chr6	+	142555648	142555756	ttcagtcgctggctgcgggtGTGGCACCATCAAGATTCACAtcacttcgacattgcttcgctctggaatgAGAATCTTGATGATGCTGCATcggcagtaagcgactata	111	aof-MIR172,osa-MIR172d,osa-MIR172a,osa-MIR172b,bdi-MIR172a,bdi-MIR172b,sbi-MIR172d,sbi-MIR172c,sbi-MIR172a,sbi-MIR172b,zma-MIR172d,zma-MIR172b,zma-MIR172c,zma-MIR172a,zma-MIR172e,ata-MIR172b,ata-MIR172c,ata-MIR172a,vca-MIR172b,vca-MIR172a,egu-MIR172b,egu-MIR172a,egu-MIR172c,mtr-MIR172b,mtr-MIR172c,mtr-MIR172d,gma-MIR172b,gma-MIR172g,gma-MIR172h,gma-MIR172f,gma-MIR172j,gma-MIR172a,gma-MIR172k,ptc-…	ata-MIR172c	gatttctggtGTGGCATCATCAAGATTCACACAatgtatggcatgcatgcgatgctctcatccttccccatccatgcatgcatgtgaactgtagttccgttcatgcatggagatggatggattgatgagcttgcttgctcgctagccagcgtactatgtgtgGGAATCTTGATGATGCTGCATcggtgatcaa	ata-miR172c-5p	GTGGCATCATCAAGATTCACACA	5'	Diff	gp2a	...(((((((..((((.((((..(((.(((((((((((.((((....(((.......))).....).))).))))))))))).)))..)))).))))..)))))))...	103	49.5	-54.2	1	515	22	282	0	13	12	136	71	15	338	216	266	193.788	52.0517	270.132	0	9.17296	16.0269	93.1538	43.3138	73.0297	184.878	73.9852	303.668	middle
79	86	aof-miR172	AGAATCTTGATGATGCTGCAT	21	chr6	+	142555648	142555756	ttcagtcgctggctgcgggtGTGGCACCATCAAGATTCACAtcacttcgacattgcttcgctctggaatgAGAATCTTGATGATGCTGCATcggcagtaagcgactata	111	aof-MIR172,osa-MIR172d,osa-MIR172a,osa-MIR172b,bdi-MIR172a,bdi-MIR172b,sbi-MIR172d,sbi-MIR172c,sbi-MIR172a,sbi-MIR172b,zma-MIR172d,zma-MIR172b,zma-MIR172c,zma-MIR172a,zma-MIR172e,ata-MIR172b,ata-MIR172c,ata-MIR172a,vca-MIR172b,vca-MIR172a,egu-MIR172b,egu-MIR172a,egu-MIR172c,mtr-MIR172b,mtr-MIR172c,mtr-MIR172d,gma-MIR172b,gma-MIR172g,gma-MIR172h,gma-MIR172f,gma-MIR172j,gma-MIR172a,gma-MIR172k,ptc-…	aof-MIR172	ctgtttgcaggtgcagcatcttcaagattcacaatattattgagaggcctcctttgatttactcagggacttgAGAATCTTGATGATGCTGCATcagcaataag	aof-miR172	AGAATCTTGATGATGCTGCAT	3'	Yes	gp2a	...(((((((..((((.((((..(((.(((((((((((.((((....(((.......))).....).))).))))))))))).)))..)))).))))..)))))))...	103	49.5	-54.2	1	1809	278	369	137	749	496	1018.5	470	38	1120	870	139	680.702	657.744	353.471	619.594	528.503	662.445	697.626	286.725	185.009	612.612	297.996	158.684	high
80	87	ptc-miR172h-5p_1ss2GT	GTAGCACCATCAAGATTCACA	21	chr10	-	221043400	221043500	tgtttgcaggtGTAGCACCATCAAGATTCACAttaaagattgaatctcaaagcgtagatcgtcaaaaaatgagaatcttgatgatgctgcatcagcgataa	5	gma-MIR172k,ptc-MIR172h,csi-MIR172c,lus-MIR172a,cme-MIR172d,	ptc-MIR172h	ctgtttgccgatGGAGCACCATCAAGATTCACAaactttattagggctaataagtggtgatgatggtggcttttggtggtcccttcgtttcaacccaatagccatttgaattgGGAATCTTGATGATGCTGCAGcggcaataa	ptc-miR172h-5p	GGAGCACCATCAAGATTCACA	5'	Diff	gp2a	...((((.(((((((((.(((((((((((.((((...(((.((.(((........))))))))....)))).))))))))))).))))))))).))))...	95	37.6	-38.1	1	244.5	9	204.5	11	42.5	11	148.5	156.5	3	601	135.5	151	92.0021	21.2939	195.894	49.7484	29.9885	14.6913	101.716	95.4733	14.6059	328.732	46.412	172.383	middle
81	87	ptc-miR172h-5p_1ss2GT	GTAGCACCATCAAGATTCACA	21	unanchor467	-	52213	52332	aacagtcagtgttcgcaggtGTAGCACCATCAAGATTCACAtaaaagattgaatctcaaaacgtagatcgtcagaaaaatgagaatcttgatgatgctgcatcagcgataaccggctctt	5	gma-MIR172k,ptc-MIR172h,csi-MIR172c,lus-MIR172a,cme-MIR172d,	ptc-MIR172h	ctgtttgccgatGGAGCACCATCAAGATTCACAaactttattagggctaataagtggtgatgatggtggcttttggtggtcccttcgtttcaacccaatagccatttgaattgGGAATCTTGATGATGCTGCAGcggcaataa	ptc-miR172h-5p	GGAGCACCATCAAGATTCACA	5'	Diff	gp2a	...((((.((..((((.(((((((((.(((((((((((.(((......((((((((........))))..))))....))).))))))))))).))))))))).))))..)).))))...	114	40.8	-44.4	0.9	244.5	9	204.5	11	42.5	11	148.5	156.5	3	601	135.5	151	92.0021	21.2939	195.894	49.7484	29.9885	14.6913	101.716	95.4733	14.6059	328.732	46.412	172.383	middle
82	88	aof-miR172_R-2	AGAATCTTGATGATGCTGC	19	chr9	+	64041016	64041134	accagtcattgtttgcaattgtagcatcttcgagattcacatgggctagttttacattagtattgtggtgagaccacttgAGAATCTTGATGATGCTGCattggcaataaatgactccc	105	aof-MIR172,osa-MIR172d,osa-MIR172a,bdi-MIR172a,sbi-MIR172a,sbi-MIR172c,sbi-MIR172d,zma-MIR172b,zma-MIR172d,zma-MIR172c,zma-MIR172a,ata-MIR172a,ata-MIR172b,vca-MIR172b,vca-MIR172a,egu-MIR172b,egu-MIR172c,egu-MIR172a,mtr-MIR172c,mtr-MIR172b,mtr-MIR172d,gma-MIR172g,gma-MIR172b,gma-MIR172a,gma-MIR172j,gma-MIR172f,gma-MIR172h,ptc-MIR172a,ptc-MIR172b,ptc-MIR172f,ptc-MIR172c,ath-MIR172a,ath-MIR172d,ath-…	aof-MIR172	ctgtttgcaggtgcagcatcttcaagattcacaatattattgagaggcctcctttgatttactcagggacttgAGAATCTTGATGATGCTGCATcagcaataag	aof-miR172	AGAATCTTGATGATGCTGCAT	3'	Diff	gp2a	...(((((((..((((...(((((((((.(((((((((.((...((((((.....))))))...((((.....)))).)).))))))))).)))))))))...))))..)))))))...	113	40.3	-48.9	1	0	0	3	0	0	0	2.5	0	0	0	0	0	0	0	2.87375	0	0	0	1.71239	0	0	0	0	0	low
83	89	aof-miR172_L-1	GAATCTTGATGATGCTGCAT	20	unanchor254	+	125116	125264	atttgcaggtgcagcatgatcaagatccacagactatatcaatggcaagccttcctttctttcttaatacatgtcgtacataagatgaaaggagctagggtttgttataattgtatatgcGAATCTTGATGATGCTGCATcagcaataa	106	aof-MIR172,osa-MIR172b,osa-MIR172a,osa-MIR172d,bdi-MIR172b,bdi-MIR172a,sbi-MIR172b,sbi-MIR172d,sbi-MIR172c,sbi-MIR172a,zma-MIR172a,zma-MIR172e,zma-MIR172c,zma-MIR172d,zma-MIR172b,ata-MIR172b,ata-MIR172c,vca-MIR172a,vca-MIR172b,egu-MIR172a,egu-MIR172c,egu-MIR172b,mtr-MIR172b,mtr-MIR172c,gma-MIR172l,gma-MIR172h,gma-MIR172j,gma-MIR172f,gma-MIR172a,gma-MIR172i,gma-MIR172b,gma-MIR172k,gma-MIR172g,ptc-…	aof-MIR172	ctgtttgcaggtgcagcatcttcaagattcacaatattattgagaggcctcctttgatttactcagggacttgAGAATCTTGATGATGCTGCATcagcaataag	aof-miR172	AGAATCTTGATGATGCTGCAT	3'	Diff	gp2a	..((((.((((((((((.((((((((...((...((((...((..((((((((((((((..(((((.(((.....)))..))))).)))))))....)))))))..))...))))..))...)))))))).)))))))))).))))...	144	37.6	-58.2	1	0	0	6	0	0	0	0	0	0	10	17	0	0	0	5.7475	0	0	0	0	0	0	5.46975	5.82291	0	low
84	90	aof-miR319b_2ss20CT21TC	TTTGGACTGAAGGGAGCTCTC	21	chr11	+	194230375	194230491	tttgaaatcagcagaaatgggagttttttccagcccaaatcagacagtggcaagagttacgttgttctgttactgtgaTTTGGACTGAAGGGAGCTCTCagttcttctgttttcttg	70	aof-MIR319b,aof-MIR319a,bdi-MIR319a,bdi-MIR159a,tae-MIR319,mtr-MIR319c,mtr-MIR319a,mtr-MIR319b,mtr-MIR319d,gma-MIR319p,gma-MIR319l,gma-MIR319j,gma-MIR319e,gma-MIR319h,gma-MIR319b,gma-MIR319a,gma-MIR319m,gma-MIR319k,ptc-MIR319a,ptc-MIR319d,ptc-MIR319c,ptc-MIR319b,ath-MIR319c,ath-MIR319a,ath-MIR319b,mdm-MIR319a,mdm-MIR319g,mdm-MIR319b,mdm-MIR319f,mdm-MIR319e,stu-MIR319a,aly-MIR319c,aly-MIR319d,aly-…	aof-MIR319b	gcggcagaaatgggggctcctttcagcccagaaacaataatgacaaaatattttgattattttcgttgTTTGGACTGAAGGGAGCTCCTaattcttctg	aof-miR319b	TTTGGACTGAAGGGAGCTCCT	3'	Diff	gp2a	...((((.(((.((((.(((((((((..(.(((.(((((((..(((((..((.(((........)))))..)))))))))))).))).)..))))))))).)))).))).))))...	111	41.9	-46.8	1	1994	156.5	1072	67.5	700.5	307	934.5	424	30.5	383.5	469.5	15.5	750.315	370.277	1026.89	305.275	494.281	410.021	640.09	258.663	148.494	209.765	160.815	17.695	high
85	90	aof-miR319b_2ss20CT21TC	TTTGGACTGAAGGGAGCTCTC	21	chr6	+	277079695	277079806	tttgaaatcagcagaaatgggggtttctttcagcccaaatcagacaatggtatgagttcttctcttactgtgaTTTGGACTGAAGGGAGCTCTCagttcttctgttttctcg	70	aof-MIR319b,aof-MIR319a,bdi-MIR319a,bdi-MIR159a,tae-MIR319,mtr-MIR319c,mtr-MIR319a,mtr-MIR319b,mtr-MIR319d,gma-MIR319p,gma-MIR319l,gma-MIR319e,gma-MIR319j,gma-MIR319h,gma-MIR319b,gma-MIR319a,gma-MIR319m,gma-MIR319k,ptc-MIR319a,ptc-MIR319d,ptc-MIR319c,ptc-MIR319b,ath-MIR319c,ath-MIR319a,ath-MIR319b,mdm-MIR319a,mdm-MIR319f,mdm-MIR319b,mdm-MIR319g,mdm-MIR319e,stu-MIR319a,aly-MIR319d,aly-MIR319c,aly-…	aof-MIR319b	gcggcagaaatgggggctcctttcagcccagaaacaataatgacaaaatattttgattattttcgttgTTTGGACTGAAGGGAGCTCCTaattcttctg	aof-miR319b	TTTGGACTGAAGGGAGCTCCT	3'	Diff	gp2a	...((((.(((.((((.((((((((((((((((.(((((((.....(..(((.(((.....))).)))..)))))))).)))))))))))))))).)))).))).))))...	106	42	-48.3	1	1994	156.5	1072	67.5	700.5	307	934.5	424	30.5	383.5	469.5	15.5	750.315	370.277	1026.89	305.275	494.281	410.021	640.09	258.663	148.494	209.765	160.815	17.695	high
86	91	csi-MIR390b-p3_2ss17TC18TA	CGCTATCTATCCTGAGCATT	20	chr1	+	130621841	130621966	atttagtgaaagaaatcttaaagctctggagggatagcgccatgagttgacaatgaagctctgctaactgttcgatatatatatggCGCTATCTATCCTGAGCATTatgctttcttcttactacta	1	csi-MIR390b,	csi-MIR390b	atttcgtttgtcaagtatggagaatctgtaAAGCTCAGGAGGGATAGCGCCatgataatattcttttttaattaattaattaattccttgatcaattagcggcgctggcgctatctatcctgagttttccggattcttcttgctagttttggtgcagtt	csi-MIR390b-p3	cgctatctatcctgagtttt	3'	New	gp2a	...((((((((((((...(((.((((.(((..((((((((((((.(((((((....(((...)))...)).))))).....))))))))))))..))).)))).)))...)))))).))))))...	120	38.1	-45	0.9	0	0	0	0	5.5	0	0	0	0	0	0	14.5	0	0	0	0	3.88087	0	0	0	0	0	0	16.5533	middle
87	91	csi-MIR390b-p3_2ss17TC18TA	CGCTATCTATCCTGAGCATT	20	chr4	+	3072878	3073003	atttagtgaaagaaatcttaaagctcatgagggatagcgtcatgagttgacaatgaagctctgctaactgtttgatatatatatggCGCTATCTATCCTGAGCATTatgctttcttcttactacta	1	csi-MIR390b,	csi-MIR390b	atttcgtttgtcaagtatggagaatctgtaAAGCTCAGGAGGGATAGCGCCatgataatattcttttttaattaattaattaattccttgatcaattagcggcgctggcgctatctatcctgagttttccggattcttcttgctagttttggtgcagtt	csi-MIR390b-p3	cgctatctatcctgagtttt	3'	New	gp2a	...((((((((((((...(((.(((((.((..((((((((((((((((........))))).((.....))...........)))))))))))..)).))))).)))...)))))).))))))...	120	35.7	-40.3	0.9	0	0	0	0	5.5	0	0	0	0	0	0	14.5	0	0	0	0	3.88087	0	0	0	0	0	0	16.5533	middle
88	92	gma-miR390b-5p	AAGCTCAGGAGGGATAGCACC	21	chr10	-	205720947	205721072	atttagtgaaagaaatcttaAAGCTCAGGAGGGATAGCACCatgagttgacaatgaagctctgctaattgttcgatatatatatggcgctatctatcctgagcattatgctttcttcttactacta	5	gma-MIR390b,gma-MIR390d,stu-MIR390,nta-MIR390a,sly-MIR390a,	gma-MIR390d	gagaatctgtaAAGCTCAGGAGGGATAGCACCatgatactgatgatgttcatagcagtacaaacttggcgctatctatcttgagcttcatggcttct	gma-miR390b-5p	AAGCTCAGGAGGGATAGCACC	5'	Yes	gp2a	...((((((((((((...(((.((((((((..((((((.(((((.(((((((((..(((...))).)))).))))).....))))).))))))..)))))))).)))...)))))).))))))...	120	36.5	-47.8	1	4	0	0	7	51.5	0	0	0	0	25	26	84	1.50515	0	0	31.6581	36.339	0	0	0	0	13.6744	8.90563	95.8952	middle
89	92	gma-miR390b-5p	AAGCTCAGGAGGGATAGCACC	21	chr8	+	16714242	16714366	cattagttaaagtgggaaagaatccttaAAGCTCAGGAGGGATAGCACCatggtgtatatctttgtatatgaaattagtggcgctatctatcctgagcattatggtttctttctactctctgtct	5	gma-MIR390b,gma-MIR390d,stu-MIR390,nta-MIR390a,sly-MIR390a,	gma-MIR390d	gagaatctgtaAAGCTCAGGAGGGATAGCACCatgatactgatgatgttcatagcagtacaaacttggcgctatctatcttgagcttcatggcttct	gma-miR390b-5p	AAGCTCAGGAGGGATAGCACC	5'	Yes	gp2a	...(((....(((.((((((((.((.(((.((((((((..((((((.((((....(((((......)))))......)))).))))))..)))))))).))).)).)))))))))))..)))...	119	38.4	-47.7	1	4	0	0	7	51.5	0	0	0	0	25	26	84	1.50515	0	0	31.6581	36.339	0	0	0	0	13.6744	8.90563	95.8952	middle
90	93	aof-miR390	AAGCTCAGGAGGGATAGCGCC	21	chr2	+	6843298	6843423	atttagtgaaagaaatcttaAAGCTCAGGAGGGATAGCGCCatgagttgacaatgaagctctactaactgttcgatatatatatggcgctatctatcctgagcattatgctttcttcttactacta	59	aof-MIR390,osa-MIR390,bdi-MIR390a,sbi-MIR390,zma-MIR390b,zma-MIR390a,ata-MIR390,mtr-MIR390,gma-MIR390c,gma-MIR390g,gma-MIR390e,gma-MIR390a,gma-MIR390f,ptc-MIR390a,ptc-MIR390b,ptc-MIR390d,ptc-MIR390c,ath-MIR390b,ath-MIR390a,mdm-MIR390b,mdm-MIR390a,mdm-MIR390d,mdm-MIR390e,mdm-MIR390f,mdm-MIR390c,lja-MIR390a,lja-MIR390b,aly-MIR390b,aly-MIR390a,ppe-MIR390,mes-MIR390b,mes-MIR390,vvi-MIR390,nta-MIR390c…	aof-MIR390	ccatggcttgaaccctttgctcatttcccttctagctcattctcttctattttctctccatatatttctctcaaaatcggaggaaaataaagaaaaaagtgtgaaagaatccttaAAGCTCAGGAGGGATAGCGCCattcatcatg	aof-miR390	AAGCTCAGGAGGGATAGCGCC	5'	Yes	gp2a	...((((((((((((...(((.((((((((..((((((((((((((((........))))).((.....))...........)))))))))))..)))))))).)))...)))))).))))))...	120	37.3	-49.2	1	0	0	0	2.5	9	2.5	0	0	0	12.5	5.5	0	0	0	0	11.3065	6.35051	3.33893	0	0	0	6.83719	1.88388	0	middle
91	93	aof-miR390	AAGCTCAGGAGGGATAGCGCC	21	chr4	+	10174030	10174155	atttagtgaaagaaatcttaAAGCTCAGGAGGGATAGCGCCatgagttgacaatgaaactctgctaactgttcgatatatatatggcgctatctatcctgagcattatgctttctttttactactg	59	aof-MIR390,osa-MIR390,bdi-MIR390a,sbi-MIR390,zma-MIR390b,zma-MIR390a,ata-MIR390,mtr-MIR390,gma-MIR390c,gma-MIR390e,gma-MIR390g,gma-MIR390a,gma-MIR390f,ptc-MIR390a,ptc-MIR390b,ptc-MIR390d,ptc-MIR390c,ath-MIR390b,ath-MIR390a,mdm-MIR390b,mdm-MIR390a,mdm-MIR390d,mdm-MIR390e,mdm-MIR390f,mdm-MIR390c,lja-MIR390a,lja-MIR390b,aly-MIR390b,aly-MIR390a,ppe-MIR390,mes-MIR390b,mes-MIR390,vvi-MIR390,nta-MIR390c…	aof-MIR390	ccatggcttgaaccctttgctcatttcccttctagctcattctcttctattttctctccatatatttctctcaaaatcggaggaaaataaagaaaaaagtgtgaaagaatccttaAAGCTCAGGAGGGATAGCGCCattcatcatg	aof-miR390	AAGCTCAGGAGGGATAGCGCC	5'	Yes	gp2a	...((((((((((((...(((.((((((((..((((((((((((((((........))))).((.....))...........)))))))))))..)))))))).)))...)))))))).))))...	120	37.3	-49.5	1.1	0	0	0	2.5	9	2.5	0	0	0	12.5	5.5	0	0	0	0	11.3065	6.35051	3.33893	0	0	0	6.83719	1.88388	0	middle
92	94	vca-miR391-5p_2ss1TC19CT	CTCGCAGGAGAGATGATGTCG	21	chr5	-	88982706	88982843	gagagagagagagagagctgatgaggttgccCTCGCAGGAGAGATGATGTCGcggtcgtctcagtgttcagtcctttgtcactgaccgcggcatcatctccttcgagtgtaacaacatagcttgcattaatttctaat	1	vca-MIR391,	vca-MIR391	ggtttccTTCGCAGGAGAGATGATGCCGtcccctattattattattataataaggatacgGCATCGTCTCTCCGGCGACGGtaacc	vca-miR391-5p	TTCGCAGGAGAGATGATGCCG	5'	Diff	gp2a	...(((((..((..(((((.(((..(((((.((((.(((.(((((((((((((((((.....((((..(((....))).)))))))))))))))))))))))))))).)))))..))))))))...))..)))))...	132	49.3	-63.4	0.9	0	0	0	0	3	0	0	0	0	2.5	2.5	3.5	0	0	0	0	2.11684	0	0	0	0	1.36744	0.85631	3.99563	low
93	94	vca-miR391-5p_2ss1TC19CT	CTCGCAGGAGAGATGATGTCG	21	unanchor392	-	409044	409204	cagagagagagagagagagagagagagagctgatgaggttgccCTCGCAGGAGAGATGATGTCGcggtcgtctcagtgttcagtcttttgtcactgaccgcggcatcatctccttcgagtgtaacaacatagcttgcattaatttctaattactatttaca	1	vca-MIR391,	vca-MIR391	ggtttccTTCGCAGGAGAGATGATGCCGtcccctattattattattataataaggatacgGCATCGTCTCTCCGGCGACGGtaacc	vca-miR391-5p	TTCGCAGGAGAGATGATGCCG	5'	Diff	gp2a	...(((.((..(...(((((..((..(((((.(((..(((((.((((.(((.(((((((((((((((((.....((((..(((....))).)))))))))))))))))))))))))))).)))))..))))))))...))..)))))..)..)).)))...	155	46.6	-63.9	0.9	0	0	0	0	3	0	0	0	0	2.5	2.5	3.5	0	0	0	0	2.11684	0	0	0	0	1.36744	0.85631	3.99563	low
94	95	aof-miR393b_L+1R-1	TTCCAAAGGGATCGCATTGATC	22	chr10	+	210355260	210355355	taatggaaaaTTCCAAAGGGATCGCATTGATCtatttaacacataaggttaactttatttagcaagATCATGCCATCCCTTTAGAATtatccatct	68	aof-MIR393b,aof-MIR393a,osa-MIR393b,osa-MIR393a,bdi-MIR393b,bdi-MIR393a,sbi-MIR393b,sbi-MIR393a,zma-MIR393c,zma-MIR393a,zma-MIR393b,ata-MIR393,vca-MIR393,mtr-MIR393a,mtr-MIR393b,gma-MIR393k,gma-MIR393h,gma-MIR393i,gma-MIR393j,gma-MIR393d,gma-MIR393e,gma-MIR393g,gma-MIR393a,gma-MIR393c,gma-MIR393f,ptc-MIR393c,ptc-MIR393a,ptc-MIR393b,ath-MIR393b,ath-MIR393a,mdm-MIR393b,mdm-MIR393c,mdm-MIR393d,mdm-M…	aof-MIR393b	ctcttccaagtagctaatggagaatTCCAAAGGGATCGCATTGATCTaatgtatctccaacacttgtgtgtttgcttttttacttagcaagatcatgcgttcccttcggagatttccatttgttgcttcttcttcct	aof-miR393b	TCCAAAGGGATCGCATTGATCT	5'	Diff	gp2a	..(((((.(((((.((((((((.((((.(((((..((((...((((((....))))))))))..))))))))).)))))))).))))).)))))..	92	32.3	-35.2	1.1	1339.5	321	278.5	5.5	44	32.5	1352	1068.5	193	39.5	114.5	22	504.036	759.482	266.78	24.8742	31.0469	43.4061	926.059	651.842	939.649	21.6055	39.219	25.1154	high
94	96	mes-MIR393c-p3_1ss8GC	ATCATGCCATCCCTTTAGAAT	21	chr10	+	210355260	210355355	taatggaaaaTTCCAAAGGGATCGCATTGATCtatttaacacataaggttaactttatttagcaagATCATGCCATCCCTTTAGAATtatccatct	68	aof-MIR393b,aof-MIR393a,osa-MIR393b,osa-MIR393a,bdi-MIR393b,bdi-MIR393a,sbi-MIR393b,sbi-MIR393a,zma-MIR393c,zma-MIR393a,zma-MIR393b,ata-MIR393,vca-MIR393,mtr-MIR393a,mtr-MIR393b,gma-MIR393k,gma-MIR393h,gma-MIR393i,gma-MIR393j,gma-MIR393d,gma-MIR393e,gma-MIR393g,gma-MIR393a,gma-MIR393c,gma-MIR393f,ptc-MIR393c,ptc-MIR393a,ptc-MIR393b,ath-MIR393b,ath-MIR393a,mdm-MIR393b,mdm-MIR393c,mdm-MIR393d,mdm-M…	mes-MIR393c	ttagtgcagggtggagagtTCCAAAGGGATCGCATTGATCtgatgatttctgctgattcgtctcaatgatcgttaatcatcatttttgttcattggatcatgcgatccctttagaattttccaccacttgctctaa	mes-MIR393c-p3	atcatgcgatccctttagaat	3'	New	gp2a	..(((((.(((((.((((((((.((((.(((((..((((...((((((....))))))))))..))))))))).)))))))).))))).)))))..	92	32.3	-35.2	1.1	13	0	9	0	0	0	0	5	0	0	0	0	4.89172	0	8.62124	0	0	0	0	3.05027	0	0	0	0	low
95	95	aof-miR393b_L+1R-1	TTCCAAAGGGATCGCATTGATC	22	chr10	+	202623365	202623476	ttgaacagctggtggagaaTTCCAAAGGGATCGCATTGATCtttctggcataagaacctatgttcattgaaagatcatgccttccttttggaattctccataagttgttgtt	68	aof-MIR393b,aof-MIR393a,osa-MIR393b,osa-MIR393a,bdi-MIR393b,bdi-MIR393a,sbi-MIR393b,sbi-MIR393a,zma-MIR393a,zma-MIR393c,zma-MIR393b,ata-MIR393,vca-MIR393,mtr-MIR393b,mtr-MIR393a,gma-MIR393i,gma-MIR393j,gma-MIR393h,gma-MIR393k,gma-MIR393g,gma-MIR393c,gma-MIR393a,gma-MIR393f,gma-MIR393e,gma-MIR393d,ptc-MIR393c,ptc-MIR393a,ptc-MIR393b,ath-MIR393a,ath-MIR393b,mdm-MIR393b,mdm-MIR393c,mdm-MIR393d,mdm-M…	aof-MIR393b	ctcttccaagtagctaatggagaatTCCAAAGGGATCGCATTGATCTaatgtatctccaacacttgtgtgtttgcttttttacttagcaagatcatgcgttcccttcggagatttccatttgttgcttcttcttcct	aof-miR393b	TCCAAAGGGATCGCATTGATCT	5'	Diff	gp2a	...(((((((..((((((((((((((((((..((((.(((((((((((((((......)))).)))..))))))))))))..))))))))))))))))))..)))))))...	106	39.3	-57.8	1.3	1339.5	321	278.5	5.5	44	32.5	1352	1068.5	193	39.5	114.5	22	504.036	759.482	266.78	24.8742	31.0469	43.4061	926.059	651.842	939.649	21.6055	39.219	25.1154	high
96	97	aof-miR393a_L+1R-5	TTCCAAAGGGATCGCATT	18	chr8	+	233154490	233154605	gtcaagtagttaatgcagaaTTCCAAAGGGATCGCATTgatctctctaacacattgtgttaacattatttagtaagaTCATGCTATCCCTTTGGAATTttccatctgctgcttttt	69	aof-MIR393a,aof-MIR393b,osa-MIR393a,osa-MIR393b,bdi-MIR393b,bdi-MIR393a,sbi-MIR393b,sbi-MIR393a,zma-MIR393c,zma-MIR393b,zma-MIR393a,ata-MIR393,vca-MIR393,mtr-MIR393a,mtr-MIR393b,gma-MIR393e,gma-MIR393g,gma-MIR393c,gma-MIR393d,gma-MIR393b,gma-MIR393f,gma-MIR393a,gma-MIR393k,gma-MIR393j,gma-MIR393i,gma-MIR393h,ptc-MIR393a,ptc-MIR393b,ptc-MIR393c,ath-MIR393b,ath-MIR393a,mdm-MIR393h,mdm-MIR393g,mdm-M…	aof-MIR393a	cgaggaagcaTCCAAAGGGATCGCATTGATTCtcacttgattaattagttcagaattaagctaattaattttgatatccgccgagggaatcatgcggtccttttggaagtctcctct	aof-miR393a	TCCAAAGGGATCGCATTGATTC	5'	Diff	gp2a	...(((((((..(((.((((((((((((((((.((((.(((((..((((.....(((....)))....))))..))))))))).)))))))))))))))).)))..)))))))...	110	35.3	-50.3	1.2	74.5	24	14	0	4	0	81	72	64	0	8	7.5	28.0333	56.7837	13.4108	0	2.82245	0	55.4813	43.9238	311.593	0	2.74019	8.56207	middle
96	98	osa-miR393b-3p_R+1_2ss4G-8AT	TCATGCTATCCCTTTGGAATT	21	chr8	+	233154490	233154605	gtcaagtagttaatgcagaaTTCCAAAGGGATCGCATTgatctctctaacacattgtgttaacattatttagtaagaTCATGCTATCCCTTTGGAATTttccatctgctgcttttt	69	aof-MIR393a,aof-MIR393b,osa-MIR393a,osa-MIR393b,bdi-MIR393b,bdi-MIR393a,sbi-MIR393b,sbi-MIR393a,zma-MIR393c,zma-MIR393b,zma-MIR393a,ata-MIR393,vca-MIR393,mtr-MIR393a,mtr-MIR393b,gma-MIR393e,gma-MIR393g,gma-MIR393c,gma-MIR393d,gma-MIR393b,gma-MIR393f,gma-MIR393a,gma-MIR393k,gma-MIR393j,gma-MIR393i,gma-MIR393h,ptc-MIR393a,ptc-MIR393b,ptc-MIR393c,ath-MIR393b,ath-MIR393a,mdm-MIR393h,mdm-MIR393g,mdm-M…	osa-MIR393b	tcggcctgaggaaactagtggaggacTCCAAAGGGATCGCATTGATCtggctagctatctcgatcgatcgcctcatcgatcgacgacgacgtgcgtgatcgaTCAGTGCAATCCCTTTGGAATtttcctctt	osa-miR393b-3p	TCAGTGCAATCCCTTTGGAAT	3'	Diff	gp2a	...(((((((..(((.((((((((((((((((.((((.(((((..((((.....(((....)))....))))..))))))))).)))))))))))))))).)))..)))))))...	110	35.3	-50.3	1.2	241	22	44	0	0	7	233	685	6	10	21	0	90.685	52.0517	42.1483	0	0	9.34902	159.594	417.886	29.2119	5.46975	7.19301	0	middle
97	99	aof-miR393a_1ss22CT	TCCAAAGGGATCGCATTGATTT	22	chr1	-	179265918	179266094	gagggatttttgcaaatgctactgcggtctgtgggtcgatgaagaaTCCAAAGGGATCGCATTGATTCttcttcttcttcttcttaatgcttaattgaacattgagaaagaatcatgcgatctttctggattcttcctccatgcacttaattacggccagctgctacaatatccaca	27	aof-MIR393a,aof-MIR393b,osa-MIR393b,bdi-MIR393b,sbi-MIR393b,zma-MIR393c,zma-MIR393a,vca-MIR393,gma-MIR393k,gma-MIR393j,gma-MIR393i,gma-MIR393h,ptc-MIR393c,mdm-MIR393a,mdm-MIR393f,mdm-MIR393b,mdm-MIR393c,mdm-MIR393d,mdm-MIR393e,ppe-MIR393b,mes-MIR393d,mes-MIR393c,csi-MIR393b,lus-MIR393d,lus-MIR393b,ghr-MIR393,rco-MIR393,	aof-MIR393a	cgaggaagcaTCCAAAGGGATCGCATTGATTCtcacttgattaattagttcagaattaagctaattaattttgatatccgccgagggaatcatgcggtccttttggaagtctcctct	aof-miR393a	TCCAAAGGGATCGCATTGATTC	5'	Diff	gp2a	...((((....(((...(((.(((..((..(((..(.((.((((((((((.(..((((((((.(((((((...........((((((((.((....)).)))))))))))))))))))))))..).)))))))))).)).)..)))...))..)))..))))))......))))...	171	41.2	-59.1	0.8	33	6	0	0	0	0	16	29	8	5	0	0	12.4175	14.1959	0	0	0	0	10.9593	17.6915	38.9492	2.73488	0	0	middle
98	100	aof-miR393a	TCCAAAGGGATCGCATTGATTC	22	chr2	-	262059855	262060005	aggggtttgtgcaaatgctactgagggttgaggaagaaTCCAAAGGGATCGCATTGATTCttctagccttaattcttgaacattgaaaaagaatcatgcgatctttctggattcttcctccatccactcaattgccagctacagtatcaac	1	aof-MIR393a,	aof-MIR393a	cgaggaagcaTCCAAAGGGATCGCATTGATTCtcacttgattaattagttcagaattaagctaattaattttgatatccgccgagggaatcatgcggtccttttggaagtctcctct	aof-miR393a	TCCAAAGGGATCGCATTGATTC	5'	Yes	gp2a	...(((((((((....((...((((((..(((((((((((((.(..((((((((.(((((((......(((((........)))))..)))))))))))))))..).)))))))))))))...)).))))...))..)).)))).)))...	145	41.7	-56.8	0.9	18	0	0	0	54.5	0	13.5	14.5	3	20	0	21	6.77316	0	0	0	38.4559	0	9.24689	8.84577	14.6059	10.9395	0	23.9738	middle
99	100	aof-miR393a	TCCAAAGGGATCGCATTGATTC	22	unanchor121	-	1084073	1084260	gaagagagagagagaggggtttgtgcaaatgctactgagggttgaggaagaaTCCAAAGGGATCGCATTGATTCttctagccttaattcttgaacattgaaaaagaatcatgcgatctttctggattcttcctccatccactcaattaccagctacagtatcaacaatattcaggtctctccctcatg	1	aof-MIR393a,	aof-MIR393a	cgaggaagcaTCCAAAGGGATCGCATTGATTCtcacttgattaattagttcagaattaagctaattaattttgatatccgccgagggaatcatgcggtccttttggaagtctcctct	aof-miR393a	TCCAAAGGGATCGCATTGATTC	5'	Yes	gp2a	...(((.(((((((((..(((..(((....(((..((((((..(((((((((((((.(..((((((((.(((((((......(((((........)))))..)))))))))))))))..).)))))))))))))...)).))))......)))....)))..)))....)))...)))))).)))...	182	42	-68.3	0.9	18	0	0	0	54.5	0	13.5	14.5	3	20	0	21	6.77316	0	0	0	38.4559	0	9.24689	8.84577	14.6059	10.9395	0	23.9738	middle
100	101	ata-miR395a-5p_2ss6CT21GT	GTTCCTTTCAAGCACTTCAGT	21	chr10	+	123448938	123449052	caaactggctgcttcctagtGTTCCTTTCAAGCACTTCAGTagtagttattacagaggaattgaatctaacccttaactcctgaagtgtTTGGGGGAACTCTGGGCACCagtatc	111	aof-MIR395a,osa-MIR395i,tae-MIR395b,ata-MIR395a,ata-MIR395f,mtr-MIR395h,gma-MIR395b,gma-MIR395c,gma-MIR395a,ptc-MIR395k,ptc-MIR395e,ptc-MIR395f,ptc-MIR395b,ptc-MIR395d,ptc-MIR395c,ptc-MIR395i,ptc-MIR395g,ptc-MIR395h,ptc-MIR395j,ath-MIR395a,ath-MIR395d,ath-MIR395e,mdm-MIR395b,mdm-MIR395g,mdm-MIR395a,mdm-MIR395d,mdm-MIR395h,mdm-MIR395i,mdm-MIR395c,mdm-MIR395e,mdm-MIR395f,mdm-MIR395l,stu-MIR395h,stu…	ata-MIR395f	ctcgtcgggaGTTCCCTTCAAGCACTTCAGGaagcatctctttcaaggcatttcTGAAGTGTTTGGGGGAACTCttgttgtcgc	ata-miR395a-5p	GTTCCCTTCAAGCACTTCAGG	5'	Diff	gp2a	...(((((.(((...((((.(((.((..((((((((((((.(((.((....)).((((.............)))).))).))))))))))))..))))).))))))))))))...	109	44.3	-43.2	0.8	102	27	77	0	0	0	0	0	0	0	0	0	38.3812	63.8816	73.7595	0	0	0	0	0	0	0	0	0	middle
100	102	osa-MIR395i-p3_2ss14TG17TC	TTGGGGGAACTCTGGGCACC	20	chr10	+	123448938	123449052	caaactggctgcttcctagtGTTCCTTTCAAGCACTTCAGTagtagttattacagaggaattgaatctaacccttaactcctgaagtgtTTGGGGGAACTCTGGGCACCagtatc	111	aof-MIR395a,osa-MIR395i,tae-MIR395b,ata-MIR395a,ata-MIR395f,mtr-MIR395h,gma-MIR395b,gma-MIR395c,gma-MIR395a,ptc-MIR395k,ptc-MIR395e,ptc-MIR395f,ptc-MIR395b,ptc-MIR395d,ptc-MIR395c,ptc-MIR395i,ptc-MIR395g,ptc-MIR395h,ptc-MIR395j,ath-MIR395a,ath-MIR395d,ath-MIR395e,mdm-MIR395b,mdm-MIR395g,mdm-MIR395a,mdm-MIR395d,mdm-MIR395h,mdm-MIR395i,mdm-MIR395c,mdm-MIR395e,mdm-MIR395f,mdm-MIR395l,stu-MIR395h,stu…	osa-MIR395i	gttttaccgggagttctcttcaagcacttcacgtagagctttctattgacatggagctttagaacaatGTGAAGTGTTTGGGGGAACTCttggtaccaa	osa-MIR395i-p3	TTGGGGGAACTCttggtacc	3'	New	gp2a	...(((((.(((...((((.(((.((..((((((((((((.(((.((....)).((((.............)))).))).))))))))))))..))))).))))))))))))...	109	44.3	-43.2	0.8	220.5	60.5	25	0	0	0	0	0	0	0	0	0	82.9712	143.142	23.9479	0	0	0	0	0	0	0	0	0	middle
101	103	gma-MIR395i-p3_1ss14TA_2	TTGGGGGAACTCTAGGGCTCA	21	chr1	+	45347430	45347519	ggctgaatcctggagttcctcccaaccacttcagtagtttttgtattgaagaaagcactgaagtgtTTGGGGGAACTCTAGGGCTCAcat	183	aof-MIR395a,osa-MIR395m,osa-MIR395h,osa-MIR395k,osa-MIR395j,osa-MIR395n,osa-MIR395y,osa-MIR395r,osa-MIR395b,osa-MIR395g,osa-MIR395i,osa-MIR395q,osa-MIR395l,osa-MIR395p,osa-MIR395e,osa-MIR395d,osa-MIR395s,bdi-MIR395o,bdi-MIR395k,bdi-MIR395f,bdi-MIR395q,bdi-MIR395a,bdi-MIR395n,bdi-MIR395e,bdi-MIR395m,bdi-MIR395l,bdi-MIR395g,bdi-MIR395h,bdi-MIR395b,bdi-MIR395j,bdi-MIR395c,sbi-MIR395h,sbi-MIR395e,sbi…	gma-MIR395i	ctgttggctgtctcctgcagttcctctgaacgcttcatgtgaggggctagcaagtgtatacgttataatttagccttcttcaATGAAGTGTTTGGGGGAACTCttgggctcaacca	gma-MIR395i-p3	TTGGGGGAACTCttgggctca	3'	New	gp2a	...(((..(((((((((((.(((((.(((((((((.((((((........))))))))))))))).))))))))))))))))..)))...	84	46.7	-51.1	1.2	212	19	28	0	0	0	0	6	0	0	0	0	79.7727	44.9537	26.8216	0	0	0	0	3.66032	0	0	0	0	middle
102	104	aof-miR395a_R-1_1ss20CT	TGAAGTGTTTGGGGGAACTT	20	chr6	-	271320810	271320911	taaactggatgaatcctggagttcctcccaaccacttcagtagtttttgtattgaagaaagcatTGAAGTGTTTGGGGGAACTCtagggctcacacagtcct	189	aof-MIR395a,osa-MIR395n,osa-MIR395j,osa-MIR395k,osa-MIR395m,osa-MIR395h,osa-MIR395s,osa-MIR395d,osa-MIR395l,osa-MIR395p,osa-MIR395e,osa-MIR395i,osa-MIR395q,osa-MIR395g,osa-MIR395b,osa-MIR395r,osa-MIR395y,bdi-MIR395l,bdi-MIR395m,bdi-MIR395e,bdi-MIR395n,bdi-MIR395a,bdi-MIR395f,bdi-MIR395q,bdi-MIR395k,bdi-MIR395o,bdi-MIR395b,bdi-MIR395c,bdi-MIR395j,bdi-MIR395g,bdi-MIR395h,sbi-MIR395f,sbi-MIR395d,sbi…	aof-MIR395a	tgttgcttatccccgggagttccctcaaacactttgttatataactcaatctctctgatacaagggaggtagtattctacTGAAGTGTTTGGGGGAACTCTggatggtaat	aof-miR395a	TGAAGTGTTTGGGGGAACTCT	3'	Diff	gp2a	...((((..(((..(((((((((((.(((((.(((((((((.((((((........))))))))))))))).))))))))))))))))..)))..))))...	96	44.1	-55.3	1.2	138.5	44	16.5	0	0	0	0	0	0	0	0	0	52.1157	104.103	15.8056	0	0	0	0	0	0	0	0	0	middle
103	105	aof-miR395a_1ss21TA	TGAAGTGTTTGGGGGAACTCA	21	chr6	-	271461567	271461668	taaactggatgaatcctggagttcctcccaaccacttcagtagtttttgtattgaagaaagcatTGAAGTGTTTGGGGGAACTCTagggctcacacagtcct	191	aof-MIR395a,osa-MIR395y,osa-MIR395g,osa-MIR395b,osa-MIR395i,osa-MIR395e,osa-MIR395s,osa-MIR395d,osa-MIR395h,osa-MIR395k,osa-MIR395j,osa-MIR395r,osa-MIR395q,osa-MIR395p,osa-MIR395l,osa-MIR395m,osa-MIR395n,osa-MIR395a,bdi-MIR395h,bdi-MIR395g,bdi-MIR395c,bdi-MIR395j,bdi-MIR395b,bdi-MIR395o,bdi-MIR395k,bdi-MIR395q,bdi-MIR395f,bdi-MIR395m,bdi-MIR395e,bdi-MIR395n,bdi-MIR395l,bdi-MIR395a,sbi-MIR395a,sbi…	aof-MIR395a	tgttgcttatccccgggagttccctcaaacactttgttatataactcaatctctctgatacaagggaggtagtattctacTGAAGTGTTTGGGGGAACTCTggatggtaat	aof-miR395a	TGAAGTGTTTGGGGGAACTCT	3'	Diff	gp2a	...((((..(((..(((((((((((.(((((.(((((((((.((((((........))))))))))))))).))))))))))))))))..)))..))))...	96	44.1	-55.3	1.2	175.5	84	23.5	0	0	0	0	0	0	0	0	0	66.0383	198.743	22.511	0	0	0	0	0	0	0	0	0	middle
104	106	aof-miR395a	TGAAGTGTTTGGGGGAACTCT	21	chr8	+	135241053	135241155	aaaactggttgaatcctagagttccttcccaaccacttcagtagtttttgtattaatgaaagcacTGAAGTGTTTGGGGGAACTCTatggctcacacagtcct	161	aof-MIR395a,osa-MIR395k,osa-MIR395h,osa-MIR395j,osa-MIR395y,osa-MIR395i,osa-MIR395g,osa-MIR395b,osa-MIR395e,osa-MIR395s,osa-MIR395d,bdi-MIR395o,bdi-MIR395k,bdi-MIR395q,bdi-MIR395f,bdi-MIR395l,bdi-MIR395m,bdi-MIR395n,bdi-MIR395e,bdi-MIR395h,bdi-MIR395g,bdi-MIR395b,bdi-MIR395c,bdi-MIR395j,sbi-MIR395e,sbi-MIR395d,sbi-MIR395f,sbi-MIR395a,sbi-MIR395b,sbi-MIR395c,zma-MIR395e,zma-MIR395h,zma-MIR395j,zma…	aof-MIR395a	tgttgcttatccccgggagttccctcaaacactttgttatataactcaatctctctgatacaagggaggtagtattctacTGAAGTGTTTGGGGGAACTCTggatggtaat	aof-miR395a	TGAAGTGTTTGGGGGAACTCT	3'	Yes	gp2a	...((((..(((..(.(((((((((..(((((.(((((((((.(((((..(....)..)))))))))))))).)))))))))))))).)..)))..))))...	97	41.7	-49.1	1.1	72.5	35.5	26	0	0	0	0	0	0	0	0	0	27.2808	83.9925	24.9058	0	0	0	0	0	0	0	0	0	middle
105	107	aof-miR396b_1ss21GA	TTCCACAGCTTTCTTGAACTA	21	chr1	+	426603280	426603407	aatggttccctttgttgttTTCCACAGCTTTCTTGAACTAcatgcttatattcatgacaacttgaattgccaagggcttcagaattgcaGTTCAATAAAGCTGTGGTaaatcacagagagaaaccctc	92	aof-MIR396b,osa-MIR396c,osa-MIR396a,osa-MIR396b,bdi-MIR396c,bdi-MIR396d,bdi-MIR396e,sbi-MIR396c,sbi-MIR396b,sbi-MIR396a,zma-MIR396f,zma-MIR396e,zma-MIR396b,zma-MIR396a,ata-MIR396e,ata-MIR396c,vca-MIR396,sof-MIR396,ssp-MIR396,mtr-MIR396b,mtr-MIR396a,gma-MIR396c,gma-MIR396g,gma-MIR396d,gma-MIR396b,gma-MIR396a,gma-MIR396k,gma-MIR396h,gma-MIR396e,gma-MIR396i,gma-MIR396f,ptc-MIR396b,ptc-MIR396d,ptc-MI…	aof-MIR396b	ttcataaatggttctctttgtatttTTCCACAGCTTTCTTGAACTGcatagaaaagggcttcaattgccgaaggctgccaattttgcggttcaataaagctgtgggaaattacagagggagactaaattgaccg	aof-miR396b	TTCCACAGCTTTCTTGAACTG	5'	Diff	gp2a	...(((((.((((((..(((.((((((((((.(((((((.((..((...(((((........))))).(((...)))...))...)).))))))).)))))))))).)))..)))))).))).))...	122	39.1	-42.8	0.9	416.5	141.5	149.5	1029.5	21507	7819.5	299.5	67	55	9009.5	8408	788	156.723	334.787	143.208	4656	15175.6	10443.5	205.144	40.8736	267.776	4927.97	2879.94	899.589	high
105	108	osa-miR396a-3p_R-2_1ss18GT	GTTCAATAAAGCTGTGGT	18	chr1	+	426603280	426603407	aatggttccctttgttgttTTCCACAGCTTTCTTGAACTAcatgcttatattcatgacaacttgaattgccaagggcttcagaattgcaGTTCAATAAAGCTGTGGTaaatcacagagagaaaccctc	92	aof-MIR396b,osa-MIR396c,osa-MIR396a,osa-MIR396b,bdi-MIR396c,bdi-MIR396d,bdi-MIR396e,sbi-MIR396c,sbi-MIR396b,sbi-MIR396a,zma-MIR396f,zma-MIR396e,zma-MIR396b,zma-MIR396a,ata-MIR396e,ata-MIR396c,vca-MIR396,sof-MIR396,ssp-MIR396,mtr-MIR396b,mtr-MIR396a,gma-MIR396c,gma-MIR396g,gma-MIR396d,gma-MIR396b,gma-MIR396a,gma-MIR396k,gma-MIR396h,gma-MIR396e,gma-MIR396i,gma-MIR396f,ptc-MIR396b,ptc-MIR396d,ptc-MI…	osa-MIR396b	ctttgtggtcTTCCACAGCTTTCTTGAACTGcatctttgagagagattagcatccctatgtgtggattttgcttgcacgagtgtgcaGTTCAATAAAGCTGTGGGAAattacagag	osa-miR396a-3p	GTTCAATAAAGCTGTGGGAA	3'	Diff	gp2a	...(((((.((((((..(((.((((((((((.(((((((.((..((...(((((........))))).(((...)))...))...)).))))))).)))))))))).)))..)))))).))).))...	122	39.1	-42.8	0.9	0	0	0	0	0	0	0	0	0	0	4	0	0	0	0	0	0	0	0	0	0	0	1.3701	0	low
106	107	aof-miR396b_1ss21GA	TTCCACAGCTTTCTTGAACTA	21	chr8	-	178428402	178428519	tatggctctctttgtatttTTCCACAGCTTTCTTGAACTAcagatccatccttcaactgagaaaggtaatcaaattgcagttcaataaagcTGTGGGAAATTACAGGGAGAGactact	93	aof-MIR396b,osa-MIR396a,osa-MIR396b,osa-MIR396c,bdi-MIR396c,bdi-MIR396d,bdi-MIR396e,sbi-MIR396a,sbi-MIR396b,sbi-MIR396c,zma-MIR396b,zma-MIR396a,zma-MIR396f,zma-MIR396e,ata-MIR396e,ata-MIR396c,vca-MIR396,sof-MIR396,ssp-MIR396,mtr-MIR396b,mtr-MIR396a,gma-MIR396c,gma-MIR396g,gma-MIR396d,gma-MIR396b,gma-MIR396k,gma-MIR396a,gma-MIR396h,gma-MIR396e,gma-MIR396i,gma-MIR396f,gma-MIR396j,ptc-MIR396b,ptc-MI…	aof-MIR396b	ttcataaatggttctctttgtatttTTCCACAGCTTTCTTGAACTGcatagaaaagggcttcaattgccgaaggctgccaattttgcggttcaataaagctgtgggaaattacagagggagactaaattgaccg	aof-miR396b	TTCCACAGCTTTCTTGAACTG	5'	Diff	gp2a	..((((((((..((((.((((((((((((((.(((((((.(((......(((((......).))))........))).))))))).)))))))))))))).))))..))))).)))..	114	38.1	-49.6	1.1	416.5	141.5	149.5	1029.5	21507	7819.5	299.5	67	55	9009.5	8408	788	156.723	334.787	143.208	4656	15175.6	10443.5	205.144	40.8736	267.776	4927.97	2879.94	899.589	high
106	109	aof-MIR396b-p3_2ss16AG18GA	TGTGGGAAATTACAGGGAGAG	21	chr8	-	178428402	178428519	tatggctctctttgtatttTTCCACAGCTTTCTTGAACTAcagatccatccttcaactgagaaaggtaatcaaattgcagttcaataaagcTGTGGGAAATTACAGGGAGAGactact	93	aof-MIR396b,osa-MIR396a,osa-MIR396b,osa-MIR396c,bdi-MIR396c,bdi-MIR396d,bdi-MIR396e,sbi-MIR396a,sbi-MIR396b,sbi-MIR396c,zma-MIR396b,zma-MIR396a,zma-MIR396f,zma-MIR396e,ata-MIR396e,ata-MIR396c,vca-MIR396,sof-MIR396,ssp-MIR396,mtr-MIR396b,mtr-MIR396a,gma-MIR396c,gma-MIR396g,gma-MIR396d,gma-MIR396b,gma-MIR396k,gma-MIR396a,gma-MIR396h,gma-MIR396e,gma-MIR396i,gma-MIR396f,gma-MIR396j,ptc-MIR396b,ptc-MI…	aof-MIR396b	ttcataaatggttctctttgtatttTTCCACAGCTTTCTTGAACTGcatagaaaagggcttcaattgccgaaggctgccaattttgcggttcaataaagctgtgggaaattacagagggagactaaattgaccg	aof-MIR396b-p3	tgtgggaaattacagagggag	3'	New	gp2a	..((((((((..((((.((((((((((((((.(((((((.(((......(((((......).))))........))).))))))).)))))))))))))).))))..))))).)))..	114	38.1	-49.6	1.1	0	0	0	0	9	0	0	0	0	30	51.5	12	0	0	0	0	6.35051	0	0	0	0	16.4093	17.64	13.6993	middle
107	110	aof-miR396b_R+1_1	TTCCACAGCTTTCTTGAACTGA	22	chr10	-	166595774	166595885	ggctctcttcgtatttTTCCACAGCTTTCTTGAACTGCagatccatccttcaatttagaattgataatcaaattgcaGTTCAATAACGCTGTGGGAAAttacagggagaaac	91	aof-MIR396b,osa-MIR396c,osa-MIR396b,osa-MIR396a,bdi-MIR396e,bdi-MIR396d,bdi-MIR396c,sbi-MIR396c,sbi-MIR396b,sbi-MIR396a,zma-MIR396e,zma-MIR396f,zma-MIR396a,zma-MIR396b,ata-MIR396c,ata-MIR396e,vca-MIR396,sof-MIR396,ssp-MIR396,mtr-MIR396b,mtr-MIR396a,gma-MIR396i,gma-MIR396a,gma-MIR396e,gma-MIR396h,gma-MIR396f,gma-MIR396b,gma-MIR396k,gma-MIR396d,gma-MIR396g,gma-MIR396c,ptc-MIR396a,ptc-MIR396b,ptc-MI…	aof-MIR396b	ttcataaatggttctctttgtatttTTCCACAGCTTTCTTGAACTGcatagaaaagggcttcaattgccgaaggctgccaattttgcggttcaataaagctgtgggaaattacagagggagactaaattgaccg	aof-miR396b	TTCCACAGCTTTCTTGAACTG	5'	Diff	gp2a	...(((((..(((.(((((((((((.((.(((((((((((.........((((((...))))))........))))))))))).)).))))))))))).)))..)))))...	106	38.4	-45.8	1.1	24.5	7	4	0	9	0	5.5	7.5	0	26	26.5	62.5	9.21902	16.5619	3.83166	0	6.35051	0	3.76725	4.5754	0	14.2214	9.07689	71.3506	middle
107	111	osa-miR396a-3p_R+1_1ss10AC	GTTCAATAACGCTGTGGGAAA	21	chr10	-	166595774	166595885	ggctctcttcgtatttTTCCACAGCTTTCTTGAACTGCagatccatccttcaatttagaattgataatcaaattgcaGTTCAATAACGCTGTGGGAAAttacagggagaaac	91	aof-MIR396b,osa-MIR396c,osa-MIR396b,osa-MIR396a,bdi-MIR396e,bdi-MIR396d,bdi-MIR396c,sbi-MIR396c,sbi-MIR396b,sbi-MIR396a,zma-MIR396e,zma-MIR396f,zma-MIR396a,zma-MIR396b,ata-MIR396c,ata-MIR396e,vca-MIR396,sof-MIR396,ssp-MIR396,mtr-MIR396b,mtr-MIR396a,gma-MIR396i,gma-MIR396a,gma-MIR396e,gma-MIR396h,gma-MIR396f,gma-MIR396b,gma-MIR396k,gma-MIR396d,gma-MIR396g,gma-MIR396c,ptc-MIR396a,ptc-MIR396b,ptc-MI…	osa-MIR396a	ctttgtgatcTTCCACAGCTTTCTTGAACTGcacgcatgatgaataatccctttggttaattgtgatctggtctctgagagatcgtagttagactcgatcggttgcattggcatcagagagagcaGTTCAATAAAGCTGTGGGAAattgcagag	osa-miR396a-3p	GTTCAATAAAGCTGTGGGAA	3'	Diff	gp2a	...(((((..(((.(((((((((((.((.(((((((((((.........((((((...))))))........))))))))))).)).))))))))))).)))..)))))...	106	38.4	-45.8	1.1	51	9	29.5	0	46.5	8.5	27	35.5	7	51	238.5	34.5	19.1906	21.2939	28.2585	0	32.811	11.3524	18.4938	21.6569	34.0805	27.8957	81.692	39.3855	middle
108	112	aof-MIR396b-p5	TATTTTTCCACAGCTTTCTTG	21	unanchor679	-	47937	48048	ggctctcttcgTATTTTTCCACAGCTTTCTTGaactgcagatccatccttcaattgagaattgataatcaaattgcaGTTCAATAACGCTGTGGGAAAttacagggagaaac	96	aof-MIR396b,aof-MIR396a,osa-MIR396c,osa-MIR396a,osa-MIR396b,bdi-MIR396e,bdi-MIR396c,bdi-MIR396d,sbi-MIR396c,sbi-MIR396b,sbi-MIR396a,zma-MIR396f,zma-MIR396e,zma-MIR396b,zma-MIR396a,ata-MIR396c,ata-MIR396e,vca-MIR396,sof-MIR396,ssp-MIR396,mtr-MIR396b,mtr-MIR396a,mtr-MIR396c,gma-MIR396a,gma-MIR396i,gma-MIR396h,gma-MIR396e,gma-MIR396c,gma-MIR396g,gma-MIR396d,gma-MIR396b,gma-MIR396k,gma-MIR396f,ptc-MI…	aof-MIR396b	ttcataaatggttctctttgtatttTTCCACAGCTTTCTTGAACTGcatagaaaagggcttcaattgccgaaggctgccaattttgcggttcaataaagctgtgggaaattacagagggagactaaattgaccg	aof-MIR396b-p5	tatttTTCCACAGCTTTCTTG	5'	New	gp2a	...(((((..(((.(((((((((((.((.(((((((((((.........((((((...))))))........))))))))))).)).))))))))))).)))..)))))...	106	39.3	-45.8	1	28	7	4	12	88.5	28	5.5	7.5	0	111	90.5	119.5	10.536	16.5619	3.83166	54.271	62.4467	37.3961	3.76725	4.5754	0	60.7142	30.9984	136.422	middle
108	111	osa-miR396a-3p_R+1_1ss10AC	GTTCAATAACGCTGTGGGAAA	21	unanchor679	-	47937	48048	ggctctcttcgTATTTTTCCACAGCTTTCTTGaactgcagatccatccttcaattgagaattgataatcaaattgcaGTTCAATAACGCTGTGGGAAAttacagggagaaac	96	aof-MIR396b,aof-MIR396a,osa-MIR396c,osa-MIR396a,osa-MIR396b,bdi-MIR396e,bdi-MIR396c,bdi-MIR396d,sbi-MIR396c,sbi-MIR396b,sbi-MIR396a,zma-MIR396f,zma-MIR396e,zma-MIR396b,zma-MIR396a,ata-MIR396c,ata-MIR396e,vca-MIR396,sof-MIR396,ssp-MIR396,mtr-MIR396b,mtr-MIR396a,mtr-MIR396c,gma-MIR396a,gma-MIR396i,gma-MIR396h,gma-MIR396e,gma-MIR396c,gma-MIR396g,gma-MIR396d,gma-MIR396b,gma-MIR396k,gma-MIR396f,ptc-MI…	osa-MIR396b	ctttgtggtcTTCCACAGCTTTCTTGAACTGcatctttgagagagattagcatccctatgtgtggattttgcttgcacgagtgtgcaGTTCAATAAAGCTGTGGGAAattacagag	osa-miR396a-3p	GTTCAATAAAGCTGTGGGAA	3'	Diff	gp2a	...(((((..(((.(((((((((((.((.(((((((((((.........((((((...))))))........))))))))))).)).))))))))))).)))..)))))...	106	39.3	-45.8	1	51	9	29.5	0	46.5	8.5	27	35.5	7	51	238.5	34.5	19.1906	21.2939	28.2585	0	32.811	11.3524	18.4938	21.6569	34.0805	27.8957	81.692	39.3855	middle
109	113	aof-miR396b	TTCCACAGCTTTCTTGAACTG	21	chr4	+	42163564	42163644	atcTTCCACAGCTTTCTTGAACTGcatccaaattatcccacacacgactctcacttgcaGTTCAATAAAGTTGTGGGAAAc	92	aof-MIR396b,osa-MIR396b,osa-MIR396a,osa-MIR396c,bdi-MIR396d,bdi-MIR396c,bdi-MIR396e,sbi-MIR396b,sbi-MIR396a,sbi-MIR396c,zma-MIR396a,zma-MIR396b,zma-MIR396e,zma-MIR396f,ata-MIR396e,ata-MIR396c,vca-MIR396,sof-MIR396,ssp-MIR396,mtr-MIR396b,mtr-MIR396a,gma-MIR396i,gma-MIR396e,gma-MIR396h,gma-MIR396a,gma-MIR396f,gma-MIR396k,gma-MIR396b,gma-MIR396d,gma-MIR396g,gma-MIR396c,ptc-MIR396a,ptc-MIR396b,ptc-MI…	aof-MIR396b	ttcataaatggttctctttgtatttTTCCACAGCTTTCTTGAACTGcatagaaaagggcttcaattgccgaaggctgccaattttgcggttcaataaagctgtgggaaattacagagggagactaaattgaccg	aof-miR396b	TTCCACAGCTTTCTTGAACTG	5'	Yes	gp2a	...((((((((((((.((((((((((.............................)))))))))).))))))))))))...	75	42	-30	0.9	1775.5	619.5	368.5	407.5	1663	979.5	610	508	318	1690	2505	2879.5	668.097	1465.73	352.992	1842.95	1173.43	1308.19	417.822	309.907	1548.23	924.388	858.023	3287.27	high
109	114	osa-miR396a-3p_R+1_1ss12CT	GTTCAATAAAGTTGTGGGAAA	21	chr4	+	42163564	42163644	atcTTCCACAGCTTTCTTGAACTGcatccaaattatcccacacacgactctcacttgcaGTTCAATAAAGTTGTGGGAAAc	92	aof-MIR396b,osa-MIR396b,osa-MIR396a,osa-MIR396c,bdi-MIR396d,bdi-MIR396c,bdi-MIR396e,sbi-MIR396b,sbi-MIR396a,sbi-MIR396c,zma-MIR396a,zma-MIR396b,zma-MIR396e,zma-MIR396f,ata-MIR396e,ata-MIR396c,vca-MIR396,sof-MIR396,ssp-MIR396,mtr-MIR396b,mtr-MIR396a,gma-MIR396i,gma-MIR396e,gma-MIR396h,gma-MIR396a,gma-MIR396f,gma-MIR396k,gma-MIR396b,gma-MIR396d,gma-MIR396g,gma-MIR396c,ptc-MIR396a,ptc-MIR396b,ptc-MI…	osa-MIR396a	ctttgtgatcTTCCACAGCTTTCTTGAACTGcacgcatgatgaataatccctttggttaattgtgatctggtctctgagagatcgtagttagactcgatcggttgcattggcatcagagagagcaGTTCAATAAAGCTGTGGGAAattgcagag	osa-miR396a-3p	GTTCAATAAAGCTGTGGGAA	3'	Diff	gp2a	...((((((((((((.((((((((((.............................)))))))))).))))))))))))...	75	42	-30	0.9	7	0	0	0	0	0	0	6.5	0	0	95.5	0	2.63401	0	0	0	0	0	0	3.96535	0	0	32.7111	0	middle
110	113	aof-miR396b	TTCCACAGCTTTCTTGAACTG	21	chr9	+	58670526	58670648	tggttctctttgttgttTTCCACAGCTTTCTTGAACTGcatgcatatattcatgacaacttgaattgccaagggcttcagaattgcaGTTCAATAAAGCTGTGGGAActcacagagagaaacc	92	aof-MIR396b,osa-MIR396a,osa-MIR396b,osa-MIR396c,bdi-MIR396c,bdi-MIR396d,bdi-MIR396e,sbi-MIR396a,sbi-MIR396b,sbi-MIR396c,zma-MIR396b,zma-MIR396a,zma-MIR396f,zma-MIR396e,ata-MIR396e,ata-MIR396c,vca-MIR396,sof-MIR396,ssp-MIR396,mtr-MIR396b,mtr-MIR396a,gma-MIR396h,gma-MIR396a,gma-MIR396i,gma-MIR396e,gma-MIR396d,gma-MIR396b,gma-MIR396k,gma-MIR396c,gma-MIR396g,gma-MIR396f,ptc-MIR396a,ptc-MIR396b,ptc-MI…	aof-MIR396b	ttcataaatggttctctttgtatttTTCCACAGCTTTCTTGAACTGcatagaaaagggcttcaattgccgaaggctgccaattttgcggttcaataaagctgtgggaaattacagagggagactaaattgaccg	aof-miR396b	TTCCACAGCTTTCTTGAACTG	5'	Yes	gp2a	.((((((((((((...(((((((((((((.((((((((((.......((((.(((...((((......))))....))))))))))))))))).)))))))))))))...)))))))))).))	122	40.7	-54.2	1.1	1775.5	619.5	368.5	407.5	1663	979.5	610	508	318	1690	2505	2879.5	668.097	1465.73	352.992	1842.95	1173.43	1308.19	417.822	309.907	1548.23	924.388	858.023	3287.27	high
110	115	osa-miR396a-3p	GTTCAATAAAGCTGTGGGAA	20	chr9	+	58670526	58670648	tggttctctttgttgttTTCCACAGCTTTCTTGAACTGcatgcatatattcatgacaacttgaattgccaagggcttcagaattgcaGTTCAATAAAGCTGTGGGAActcacagagagaaacc	92	aof-MIR396b,osa-MIR396a,osa-MIR396b,osa-MIR396c,bdi-MIR396c,bdi-MIR396d,bdi-MIR396e,sbi-MIR396a,sbi-MIR396b,sbi-MIR396c,zma-MIR396b,zma-MIR396a,zma-MIR396f,zma-MIR396e,ata-MIR396e,ata-MIR396c,vca-MIR396,sof-MIR396,ssp-MIR396,mtr-MIR396b,mtr-MIR396a,gma-MIR396h,gma-MIR396a,gma-MIR396i,gma-MIR396e,gma-MIR396d,gma-MIR396b,gma-MIR396k,gma-MIR396c,gma-MIR396g,gma-MIR396f,ptc-MIR396a,ptc-MIR396b,ptc-MI…	osa-MIR396b	ctttgtggtcTTCCACAGCTTTCTTGAACTGcatctttgagagagattagcatccctatgtgtggattttgcttgcacgagtgtgcaGTTCAATAAAGCTGTGGGAAattacagag	osa-miR396a-3p	GTTCAATAAAGCTGTGGGAA	3'	Yes	gp2a	.((((((((((((...(((((((((((((.((((((((((.......((((.(((...((((......))))....))))))))))))))))).)))))))))))))...)))))))))).))	122	40.7	-54.2	1.1	7.5	4	28	11	21.5	2.5	17	2.5	16	67	265.5	41.5	2.82215	9.46395	26.8216	49.7484	15.1707	3.33893	11.6442	1.52513	77.8983	36.6473	90.9401	47.3768	middle
111	116	aof-miR396b_1ss2TN	TNCCACAGCTTTCTTGAACTG	21	unanchor326	-	26291	26413	tggttctctttgttgttTTCCACAGCTTTCTTGAACTGcatgcatatatgcatgacaacttgaattgccaagggcttcagaattgcaGTTCAATAAAGCTGTGGGAAAtcacagagagaaacc	100	aof-MIR396b,aof-MIR396a,osa-MIR396a,osa-MIR396b,osa-MIR396c,bdi-MIR396c,bdi-MIR396d,bdi-MIR396e,sbi-MIR396b,sbi-MIR396a,sbi-MIR396c,zma-MIR396b,zma-MIR396a,zma-MIR396f,zma-MIR396e,zma-MIR396g,zma-MIR396h,ata-MIR396e,ata-MIR396c,vca-MIR396,sof-MIR396,ssp-MIR396,mtr-MIR396b,mtr-MIR396a,mtr-MIR396c,gma-MIR396h,gma-MIR396e,gma-MIR396d,gma-MIR396a,gma-MIR396k,gma-MIR396b,gma-MIR396c,gma-MIR396g,gma-MI…	aof-MIR396b	ttcataaatggttctctttgtatttTTCCACAGCTTTCTTGAACTGcatagaaaagggcttcaattgccgaaggctgccaattttgcggttcaataaagctgtgggaaattacagagggagactaaattgaccg	aof-miR396b	TTCCACAGCTTTCTTGAACTG	5'	Diff	gp2a	.((((((((((((..((((((((((((((.((((((((((.(((....)))........(((((..(((...))))))))...)))))))))).))))))))))))))..)))))))))).))	122	40.7	-58.5	1.2	5	0	0	0	17.5	0	0	0	0	8	17	0	1.88143	0	0	0	12.3482	0	0	0	0	4.3758	5.82291	0	middle
111	114	osa-miR396a-3p_R+1_1ss12CT	GTTCAATAAAGTTGTGGGAAA	21	unanchor326	-	26291	26413	tggttctctttgttgttTTCCACAGCTTTCTTGAACTGcatgcatatatgcatgacaacttgaattgccaagggcttcagaattgcaGTTCAATAAAGCTGTGGGAAAtcacagagagaaacc	100	aof-MIR396b,aof-MIR396a,osa-MIR396a,osa-MIR396b,osa-MIR396c,bdi-MIR396c,bdi-MIR396d,bdi-MIR396e,sbi-MIR396b,sbi-MIR396a,sbi-MIR396c,zma-MIR396b,zma-MIR396a,zma-MIR396f,zma-MIR396e,zma-MIR396g,zma-MIR396h,ata-MIR396e,ata-MIR396c,vca-MIR396,sof-MIR396,ssp-MIR396,mtr-MIR396b,mtr-MIR396a,mtr-MIR396c,gma-MIR396h,gma-MIR396e,gma-MIR396d,gma-MIR396a,gma-MIR396k,gma-MIR396b,gma-MIR396c,gma-MIR396g,gma-MI…	osa-MIR396b	ctttgtggtcTTCCACAGCTTTCTTGAACTGcatctttgagagagattagcatccctatgtgtggattttgcttgcacgagtgtgcaGTTCAATAAAGCTGTGGGAAattacagag	osa-miR396a-3p	GTTCAATAAAGCTGTGGGAA	3'	Diff	gp2a	.((((((((((((..((((((((((((((.((((((((((.(((....)))........(((((..(((...))))))))...)))))))))).))))))))))))))..)))))))))).))	122	40.7	-58.5	1.2	7	0	0	0	0	0	0	6.5	0	0	95.5	0	2.63401	0	0	0	0	0	0	3.96535	0	0	32.7111	0	middle
112	117	aof-miR396b_R+1_2	TTCCACAGCTTTCTTGAACTGC	22	chr4	+	91542906	91543033	aatggttctctttgttgttTTCCACAGCTTTCTTGAACTGCatgcatatattcatgacaacttgaattgccaagggcttcagaattgcaGTTCAATAAAGCTGTGGGAAAtcacagagagaaaccctc	93	aof-MIR396b,osa-MIR396a,osa-MIR396b,osa-MIR396c,bdi-MIR396c,bdi-MIR396d,bdi-MIR396e,sbi-MIR396a,sbi-MIR396b,sbi-MIR396c,zma-MIR396b,zma-MIR396a,zma-MIR396f,zma-MIR396e,ata-MIR396e,ata-MIR396c,vca-MIR396,sof-MIR396,ssp-MIR396,mtr-MIR396b,mtr-MIR396a,gma-MIR396a,gma-MIR396i,gma-MIR396d,gma-MIR396k,gma-MIR396h,gma-MIR396b,gma-MIR396c,gma-MIR396g,gma-MIR396f,gma-MIR396e,ptc-MIR396a,ptc-MIR396b,ptc-MI…	aof-MIR396b	ttcataaatggttctctttgtatttTTCCACAGCTTTCTTGAACTGcatagaaaagggcttcaattgccgaaggctgccaattttgcggttcaataaagctgtgggaaattacagagggagactaaattgaccg	aof-miR396b	TTCCACAGCTTTCTTGAACTG	5'	Diff	gp2a	...((((((((((((..((((((((((((((.((((((((((.......((((.(((...((((......))))....))))))))))))))))).))))))))))))))..)))))))))).))...	122	39.8	-58	1.1	24.5	7	4	0	9	0	5.5	7.5	0	26	26.5	62.5	9.21902	16.5619	3.83166	0	6.35051	0	3.76725	4.5754	0	14.2214	9.07689	71.3506	middle
112	118	osa-miR396a-3p_R+1	GTTCAATAAAGCTGTGGGAAA	21	chr4	+	91542906	91543033	aatggttctctttgttgttTTCCACAGCTTTCTTGAACTGCatgcatatattcatgacaacttgaattgccaagggcttcagaattgcaGTTCAATAAAGCTGTGGGAAAtcacagagagaaaccctc	93	aof-MIR396b,osa-MIR396a,osa-MIR396b,osa-MIR396c,bdi-MIR396c,bdi-MIR396d,bdi-MIR396e,sbi-MIR396a,sbi-MIR396b,sbi-MIR396c,zma-MIR396b,zma-MIR396a,zma-MIR396f,zma-MIR396e,ata-MIR396e,ata-MIR396c,vca-MIR396,sof-MIR396,ssp-MIR396,mtr-MIR396b,mtr-MIR396a,gma-MIR396a,gma-MIR396i,gma-MIR396d,gma-MIR396k,gma-MIR396h,gma-MIR396b,gma-MIR396c,gma-MIR396g,gma-MIR396f,gma-MIR396e,ptc-MIR396a,ptc-MIR396b,ptc-MI…	osa-MIR396b	ctttgtggtcTTCCACAGCTTTCTTGAACTGcatctttgagagagattagcatccctatgtgtggattttgcttgcacgagtgtgcaGTTCAATAAAGCTGTGGGAAattacagag	osa-miR396a-3p	GTTCAATAAAGCTGTGGGAA	3'	Diff	gp2a	...((((((((((((..((((((((((((((.((((((((((.......((((.(((...((((......))))....))))))))))))))))).))))))))))))))..)))))))))).))...	122	39.8	-58	1.1	148	29	219.5	10.5	139.5	29	47	18	28	895	4447	121.5	55.6904	68.6136	210.263	47.4872	98.4329	38.7316	32.1929	10.981	136.322	489.543	1523.2	138.706	high
113	119	aof-miR396b_R-1	TTCCACAGCTTTCTTGAACT	20	chr5	+	46315180	46315291	cctggacctctctgtaatcTTCCACAGCTTTCTTGAACTgcatccaaattatcccactcactctcacttgcaGTTCAATAAAGCTGTGGGAAActacatggagaagtccaaa	91	aof-MIR396b,osa-MIR396a,osa-MIR396b,osa-MIR396c,bdi-MIR396c,bdi-MIR396d,bdi-MIR396e,sbi-MIR396b,sbi-MIR396a,sbi-MIR396c,zma-MIR396b,zma-MIR396a,zma-MIR396f,zma-MIR396e,ata-MIR396e,ata-MIR396c,vca-MIR396,sof-MIR396,ssp-MIR396,mtr-MIR396b,mtr-MIR396a,gma-MIR396c,gma-MIR396g,gma-MIR396d,gma-MIR396b,gma-MIR396a,gma-MIR396k,gma-MIR396h,gma-MIR396e,gma-MIR396i,gma-MIR396f,ptc-MIR396b,ptc-MIR396d,ptc-MI…	aof-MIR396b	ttcataaatggttctctttgtatttTTCCACAGCTTTCTTGAACTGcatagaaaagggcttcaattgccgaaggctgccaattttgcggttcaataaagctgtgggaaattacagagggagactaaattgaccg	aof-miR396b	TTCCACAGCTTTCTTGAACTG	5'	Diff	gp2a	..(((((.((((((((...((((((((((((.((((((((((..........................)))))))))).))))))))))))...))))..)))).)))))..	108	43.8	-47.2	1	71.5	45	48	232	838.5	666	57	29	75.5	279	368	1877.5	26.9045	106.469	45.98	1049.24	591.656	889.492	39.0424	17.6915	367.583	152.606	126.049	2143.37	high
113	118	osa-miR396a-3p_R+1	GTTCAATAAAGCTGTGGGAAA	21	chr5	+	46315180	46315291	cctggacctctctgtaatcTTCCACAGCTTTCTTGAACTgcatccaaattatcccactcactctcacttgcaGTTCAATAAAGCTGTGGGAAActacatggagaagtccaaa	91	aof-MIR396b,osa-MIR396a,osa-MIR396b,osa-MIR396c,bdi-MIR396c,bdi-MIR396d,bdi-MIR396e,sbi-MIR396b,sbi-MIR396a,sbi-MIR396c,zma-MIR396b,zma-MIR396a,zma-MIR396f,zma-MIR396e,ata-MIR396e,ata-MIR396c,vca-MIR396,sof-MIR396,ssp-MIR396,mtr-MIR396b,mtr-MIR396a,gma-MIR396c,gma-MIR396g,gma-MIR396d,gma-MIR396b,gma-MIR396a,gma-MIR396k,gma-MIR396h,gma-MIR396e,gma-MIR396i,gma-MIR396f,ptc-MIR396b,ptc-MIR396d,ptc-MI…	osa-MIR396b	ctttgtggtcTTCCACAGCTTTCTTGAACTGcatctttgagagagattagcatccctatgtgtggattttgcttgcacgagtgtgcaGTTCAATAAAGCTGTGGGAAattacagag	osa-miR396a-3p	GTTCAATAAAGCTGTGGGAA	3'	Diff	gp2a	..(((((.((((((((...((((((((((((.((((((((((..........................)))))))))).))))))))))))...))))..)))).)))))..	108	43.8	-47.2	1	148	29	219.5	10.5	139.5	29	47	18	28	895	4447	121.5	55.6904	68.6136	210.263	47.4872	98.4329	38.7316	32.1929	10.981	136.322	489.543	1523.2	138.706	high
114	120	aof-miR396b_L-1R-1	TCCACAGCTTTCTTGAACT	19	chr5	+	93190996	93191161	tatcactagctctttccatctcgcaaatggttctctttgttgtttTCCACAGCTTTCTTGAACTgcatgcacatattcgcaacttgaattgcgaagggcttcagaattgcagTTCAATAAAGCTGTGGGAAAtcacagagagatcgagaactagaccgctgtgtcc	92	aof-MIR396b,osa-MIR396a,osa-MIR396b,osa-MIR396c,bdi-MIR396d,bdi-MIR396c,bdi-MIR396e,sbi-MIR396a,sbi-MIR396b,sbi-MIR396c,zma-MIR396a,zma-MIR396b,zma-MIR396f,zma-MIR396e,ata-MIR396e,ata-MIR396c,vca-MIR396,sof-MIR396,ssp-MIR396,mtr-MIR396b,mtr-MIR396a,gma-MIR396k,gma-MIR396a,gma-MIR396h,gma-MIR396b,gma-MIR396d,gma-MIR396g,gma-MIR396c,gma-MIR396f,gma-MIR396i,gma-MIR396e,ptc-MIR396d,ptc-MIR396a,ptc-MI…	aof-MIR396b	ttcataaatggttctctttgtatttTTCCACAGCTTTCTTGAACTGcatagaaaagggcttcaattgccgaaggctgccaattttgcggttcaataaagctgtgggaaattacagagggagactaaattgaccg	aof-miR396b	TTCCACAGCTTTCTTGAACTG	5'	Diff	gp2a	...(((.((((((.....(((((........(((((((((..((((((((((((((.((((((((((((......(((((((......)))))))......))....)))))))))).))))))))))))))..))))))))).)))))...)))..))))))...	160	43.4	-65.3	0.9	3.5	0	0	12	48.5	41	0	0	0	18	24.5	18.5	1.317	0	0	54.271	34.2222	54.7585	0	0	0	9.84555	8.39184	21.1198	middle
114	121	osa-miR396a-3p_L-1R+1	TTCAATAAAGCTGTGGGAAA	20	chr5	+	93190996	93191161	tatcactagctctttccatctcgcaaatggttctctttgttgtttTCCACAGCTTTCTTGAACTgcatgcacatattcgcaacttgaattgcgaagggcttcagaattgcagTTCAATAAAGCTGTGGGAAAtcacagagagatcgagaactagaccgctgtgtcc	92	aof-MIR396b,osa-MIR396a,osa-MIR396b,osa-MIR396c,bdi-MIR396d,bdi-MIR396c,bdi-MIR396e,sbi-MIR396a,sbi-MIR396b,sbi-MIR396c,zma-MIR396a,zma-MIR396b,zma-MIR396f,zma-MIR396e,ata-MIR396e,ata-MIR396c,vca-MIR396,sof-MIR396,ssp-MIR396,mtr-MIR396b,mtr-MIR396a,gma-MIR396k,gma-MIR396a,gma-MIR396h,gma-MIR396b,gma-MIR396d,gma-MIR396g,gma-MIR396c,gma-MIR396f,gma-MIR396i,gma-MIR396e,ptc-MIR396d,ptc-MIR396a,ptc-MI…	osa-MIR396b	ctttgtggtcTTCCACAGCTTTCTTGAACTGcatctttgagagagattagcatccctatgtgtggattttgcttgcacgagtgtgcaGTTCAATAAAGCTGTGGGAAattacagag	osa-miR396a-3p	GTTCAATAAAGCTGTGGGAA	3'	Diff	gp2a	...(((.((((((.....(((((........(((((((((..((((((((((((((.((((((((((((......(((((((......)))))))......))....)))))))))).))))))))))))))..))))))))).)))))...)))..))))))...	160	43.4	-65.3	0.9	82.5	25.5	26	13	308.5	71.5	32	33.5	11	283	635.5	64.5	31.0436	60.3327	24.9058	58.7936	217.681	95.4935	21.9185	20.4368	53.5551	154.794	217.674	73.6338	middle
115	122	aof-miR396b_2ss5AG21GA	TTCCGCAGCTTTCTTGAACTA	21	chr9	-	138441671	138441798	aatggttctctttgttgttTTCCGCAGCTTTCTTGAACTGcatgcatatattcatgacaacttgaattgccaagggcttcagaattgcaGTTCAATAAAGCTGTGGGaaatcacagagagaaaccctc	48	aof-MIR396b,osa-MIR396a,osa-MIR396b,bdi-MIR396c,bdi-MIR396d,sbi-MIR396b,sbi-MIR396a,zma-MIR396b,zma-MIR396a,zma-MIR396g,zma-MIR396h,ata-MIR396e,vca-MIR396,sof-MIR396,ssp-MIR396,mtr-MIR396b,gma-MIR396a,gma-MIR396i,ptc-MIR396b,ptc-MIR396a,ath-MIR396a,mdm-MIR396b,mdm-MIR396a,lja-MIR396,aly-MIR396a,mes-MIR396b,mes-MIR396a,vvi-MIR396a,vvi-MIR396d,nta-MIR396c,nta-MIR396a,csi-MIR396b,lus-MIR396a,lus-MIR…	aof-MIR396b	ttcataaatggttctctttgtatttTTCCACAGCTTTCTTGAACTGcatagaaaagggcttcaattgccgaaggctgccaattttgcggttcaataaagctgtgggaaattacagagggagactaaattgaccg	aof-miR396b	TTCCACAGCTTTCTTGAACTG	5'	Diff	gp2a	...((((((((((((..((((((((((((((.((((((((((.......((((.(((...((((......))))....))))))))))))))))).))))))))))))))..)))))))))).))...	122	40.6	-57.6	1.1	0	0	0	0	6.5	0	0	0	0	0	2.5	0	0	0	0	0	4.58648	0	0	0	0	0	0.85631	0	low
115	123	osa-miR396a-3p_R-2_1ss18GA	GTTCAATAAAGCTGTGGA	18	chr9	-	138441671	138441798	aatggttctctttgttgttTTCCGCAGCTTTCTTGAACTGcatgcatatattcatgacaacttgaattgccaagggcttcagaattgcaGTTCAATAAAGCTGTGGGaaatcacagagagaaaccctc	48	aof-MIR396b,osa-MIR396a,osa-MIR396b,bdi-MIR396c,bdi-MIR396d,sbi-MIR396b,sbi-MIR396a,zma-MIR396b,zma-MIR396a,zma-MIR396g,zma-MIR396h,ata-MIR396e,vca-MIR396,sof-MIR396,ssp-MIR396,mtr-MIR396b,gma-MIR396a,gma-MIR396i,ptc-MIR396b,ptc-MIR396a,ath-MIR396a,mdm-MIR396b,mdm-MIR396a,lja-MIR396,aly-MIR396a,mes-MIR396b,mes-MIR396a,vvi-MIR396a,vvi-MIR396d,nta-MIR396c,nta-MIR396a,csi-MIR396b,lus-MIR396a,lus-MIR…	osa-MIR396b	ctttgtggtcTTCCACAGCTTTCTTGAACTGcatctttgagagagattagcatccctatgtgtggattttgcttgcacgagtgtgcaGTTCAATAAAGCTGTGGGAAattacagag	osa-miR396a-3p	GTTCAATAAAGCTGTGGGAA	3'	Diff	gp2a	...((((((((((((..((((((((((((((.((((((((((.......((((.(((...((((......))))....))))))))))))))))).))))))))))))))..)))))))))).))...	122	40.6	-57.6	1.1	0	0	0	0	0	0	0	0	0	7	43.5	0	0	0	0	0	0	0	0	0	0	3.82883	14.8998	0	middle
116	124	aof-miR396b_2ss20TC21GA	TTCCACAGCTTTCTTGAACCA	21	unanchor443	-	985106	985223	tatggctctctttgtatttTTCCACAGCTTTCTTGAACTAcagatccatccttcaactgagaaaggtaatcaaattgcagttcaataaagcTGTGGGAAATTACAGGGAGAGactact	93	aof-MIR396b,osa-MIR396b,osa-MIR396a,osa-MIR396c,bdi-MIR396c,bdi-MIR396d,bdi-MIR396e,sbi-MIR396a,sbi-MIR396b,sbi-MIR396c,zma-MIR396b,zma-MIR396a,zma-MIR396e,zma-MIR396f,ata-MIR396e,ata-MIR396c,vca-MIR396,sof-MIR396,ssp-MIR396,mtr-MIR396b,mtr-MIR396a,gma-MIR396i,gma-MIR396a,gma-MIR396f,gma-MIR396e,gma-MIR396d,gma-MIR396b,gma-MIR396h,gma-MIR396k,gma-MIR396c,gma-MIR396g,gma-MIR396j,ptc-MIR396a,ptc-MI…	aof-MIR396b	ttcataaatggttctctttgtatttTTCCACAGCTTTCTTGAACTGcatagaaaagggcttcaattgccgaaggctgccaattttgcggttcaataaagctgtgggaaattacagagggagactaaattgaccg	aof-miR396b	TTCCACAGCTTTCTTGAACTG	5'	Diff	gp2a	..((((((((..((((.((((((((((((((.(((((((.(((......(((((......).))))........))).))))))).)))))))))))))).))))..))))).)))..	114	38.1	-49.6	1.1	16.5	2.5	0	7.5	701	99	0	4	2.5	176	192.5	64	6.20873	5.91497	0	33.9194	494.634	132.222	0	2.44021	12.1716	96.2676	65.9359	73.063	middle
116	109	aof-MIR396b-p3_2ss16AG18GA	TGTGGGAAATTACAGGGAGAG	21	unanchor443	-	985106	985223	tatggctctctttgtatttTTCCACAGCTTTCTTGAACTAcagatccatccttcaactgagaaaggtaatcaaattgcagttcaataaagcTGTGGGAAATTACAGGGAGAGactact	93	aof-MIR396b,osa-MIR396b,osa-MIR396a,osa-MIR396c,bdi-MIR396c,bdi-MIR396d,bdi-MIR396e,sbi-MIR396a,sbi-MIR396b,sbi-MIR396c,zma-MIR396b,zma-MIR396a,zma-MIR396e,zma-MIR396f,ata-MIR396e,ata-MIR396c,vca-MIR396,sof-MIR396,ssp-MIR396,mtr-MIR396b,mtr-MIR396a,gma-MIR396i,gma-MIR396a,gma-MIR396f,gma-MIR396e,gma-MIR396d,gma-MIR396b,gma-MIR396h,gma-MIR396k,gma-MIR396c,gma-MIR396g,gma-MIR396j,ptc-MIR396a,ptc-MI…	aof-MIR396b	ttcataaatggttctctttgtatttTTCCACAGCTTTCTTGAACTGcatagaaaagggcttcaattgccgaaggctgccaattttgcggttcaataaagctgtgggaaattacagagggagactaaattgaccg	aof-MIR396b-p3	tgtgggaaattacagagggag	3'	New	gp2a	..((((((((..((((.((((((((((((((.(((((((.(((......(((((......).))))........))).))))))).)))))))))))))).))))..))))).)))..	114	38.1	-49.6	1.1	0	0	0	0	9	0	0	0	0	30	51.5	12	0	0	0	0	6.35051	0	0	0	0	16.4093	17.64	13.6993	middle
117	125	osa-miR397a	TCATTGAGTGCAGCGTTGATG	21	chr6	+	5308946	5309096	ttcaaagattaaatgcaTCATTGAGTGCAGCGTTGATGaggatgttcgcatttcaactttaattctcgctgcttaatttgttttgtattagtgtatgttattcagggtttctTTATCGACACTGCACTCAATAatgtctttgatctttatc	27	osa-MIR397a,bdi-MIR397a,sbi-MIR397,vca-MIR397,mtr-MIR397,gma-MIR397b,gma-MIR397a,ptc-MIR397a,ath-MIR397a,mdm-MIR397a,mdm-MIR397b,lja-MIR397,aly-MIR397b,aly-MIR397a,ppe-MIR397,mes-MIR397b,vvi-MIR397a,nta-MIR397,csi-MIR397,lus-MIR397b,lus-MIR397a,cme-MIR397,bna-MIR397a,bna-MIR397b,cas-MIR397,rco-MIR397,ssl-MIR397,	osa-MIR397a	atcaaatgcaTCATTGAGTGCAGCGTTGATGaacaacggtaaccggtccatgttgatgcgcatttggccggtgatctgatcatcatcagcgcttcactcaatcatgcgtttggc	osa-miR397a	TCATTGAGTGCAGCGTTGATG	5'	Yes	gp2a	...((((((((((..(((.(((((((((((.(((((((((((.(((........)))..((((...(((((..(((......)))...)))))...)))).........))))))))))).))))))))))).)))..))))))))))...	145	33.8	-49	1	39	8	0	0	0	0	19	14	0	0	11	5	14.6752	18.9279	0	0	0	0	13.0141	8.54075	0	0	3.76777	5.70805	middle
117	126	gma-MIR397a-p3_2ss2CT21CA	TTATCGACACTGCACTCAATA	21	chr6	+	5308946	5309096	ttcaaagattaaatgcaTCATTGAGTGCAGCGTTGATGaggatgttcgcatttcaactttaattctcgctgcttaatttgttttgtattagtgtatgttattcagggtttctTTATCGACACTGCACTCAATAatgtctttgatctttatc	27	osa-MIR397a,bdi-MIR397a,sbi-MIR397,vca-MIR397,mtr-MIR397,gma-MIR397b,gma-MIR397a,ptc-MIR397a,ath-MIR397a,mdm-MIR397a,mdm-MIR397b,lja-MIR397,aly-MIR397b,aly-MIR397a,ppe-MIR397,mes-MIR397b,vvi-MIR397a,nta-MIR397,csi-MIR397,lus-MIR397b,lus-MIR397a,cme-MIR397,bna-MIR397a,bna-MIR397b,cas-MIR397,rco-MIR397,ssl-MIR397,	gma-MIR397a	agagaaacaTCATTGAGTGCAGCGTTGATGaagtttcactctcatctcaggtagatgcttaatttatagtgttattgtcatcgacactgcactcaatcatgtttttct	gma-MIR397a-p3	tcatcgacactgcactcaatc	3'	New	gp2a	...((((((((((..(((.(((((((((((.(((((((((((.(((........)))..((((...(((((..(((......)))...)))))...)))).........))))))))))).))))))))))).)))..))))))))))...	145	33.8	-49	1	8	4	0	0	4	0	3	23	0	0	0	3	3.01029	9.46395	0	0	2.82245	0	2.05486	14.0312	0	0	0	3.42483	middle
118	126	gma-MIR397a-p3_2ss2CT21CA	TTATCGACACTGCACTCAATA	21	unanchor61	-	152109	152257	ttcaaagattaaatgcatcattgagtgcagcgtcgatgaggatgttcgcatttcaactttaattctcgctgcttaatttgttttgtattagtgtatgttattcagggtttctTTATCGACACTGCACTCAATAatgtctgatctttatc	2	gma-MIR397a,lja-MIR397,	gma-MIR397a	agagaaacaTCATTGAGTGCAGCGTTGATGaagtttcactctcatctcaggtagatgcttaatttatagtgttattgtcatcgacactgcactcaatcatgtttttct	gma-MIR397a-p3	tcatcgacactgcactcaatc	3'	New	gp2a	...((((((((...((((.(((((((((((.(((((((((((.(((........)))..((((...(((((..(((......)))...)))))...)))).........))))))))))).))))))))))).)))).))))))))...	143	34.9	-47.4	0.9	8	4	0	0	4	0	3	23	0	0	0	3	3.01029	9.46395	0	0	2.82245	0	2.05486	14.0312	0	0	0	3.42483	middle
119	127	vvi-MIR398c-p5_2ss4TA20GT	TCCAACAGGAGTGACCTGATA	21	chr8	+	251204140	251204241	ttttaagtTCCAACAGGAGTGACCTGATAacacacactgattacaagcatctgtgacagtattttctgTGTGTTCTCAGGTCGCCCCTGctgggccttatat	45	aof-MIR398,osa-MIR398b,osa-MIR398a,bdi-MIR398a,bdi-MIR398b,mtr-MIR398c,mtr-MIR398b,mtr-MIR398a,gma-MIR398c,gma-MIR398d,gma-MIR398b,gma-MIR398a,ptc-MIR398c,ptc-MIR398b,ptc-MIR398a,ath-MIR398a,mdm-MIR398c,mdm-MIR398b,mdm-MIR398a,lja-MIR398,gra-MIR398,aly-MIR398a,ppe-MIR398a,ppe-MIR398b,mes-MIR398,vvi-MIR398c,vvi-MIR398b,vvi-MIR398a,nta-MIR398,csi-MIR398b,csi-MIR398a,lus-MIR398a,lus-MIR398f,cme-MIR3…	vvi-MIR398c	gtgtcctacaggagtgacctgagaatcacatgcccgcatcacccatctttgctctcaTGTGTTCTCAGGTCGCCCCTGctggactccc	vvi-MIR398c-p5	tcctacaggagtgacctgaga	5'	New	gp2a	...((((..(((.((((.(((((((((.(((((((((((.(((((......))))))))).......))))))).))))))))).)))).)))..))))...	96	44.1	-47.4	1.1	5	0	0	0	0	0	0	0	0	0	0	0	1.88143	0	0	0	0	0	0	0	0	0	0	0	low
119	128	aof-miR398_1ss21GT	TGTGTTCTCAGGTCGCCCCTT	21	chr8	+	251204140	251204241	ttttaagtTCCAACAGGAGTGACCTGATAacacacactgattacaagcatctgtgacagtattttctgTGTGTTCTCAGGTCGCCCCTGctgggccttatat	45	aof-MIR398,osa-MIR398b,osa-MIR398a,bdi-MIR398a,bdi-MIR398b,mtr-MIR398c,mtr-MIR398b,mtr-MIR398a,gma-MIR398c,gma-MIR398d,gma-MIR398b,gma-MIR398a,ptc-MIR398c,ptc-MIR398b,ptc-MIR398a,ath-MIR398a,mdm-MIR398c,mdm-MIR398b,mdm-MIR398a,lja-MIR398,gra-MIR398,aly-MIR398a,ppe-MIR398a,ppe-MIR398b,mes-MIR398,vvi-MIR398c,vvi-MIR398b,vvi-MIR398a,nta-MIR398,csi-MIR398b,csi-MIR398a,lus-MIR398a,lus-MIR398f,cme-MIR3…	aof-MIR398	aagcaaacggagatgagctccgactggagcgacctgctgacacatggttccggcaatgaattccgacgaaggtccaTGTGTTCTCAGGTCGCCCCTGccgggcctaatctccaccgcttctg	aof-miR398	TGTGTTCTCAGGTCGCCCCTG	3'	Diff	gp2a	...((((..(((.((((.(((((((((.(((((((((((.(((((......))))))))).......))))))).))))))))).)))).)))..))))...	96	44.1	-47.4	1.1	175	2.5	17.5	0	7	6.5	61.5	625.5	0	3.5	5.5	0	65.8501	5.91497	16.7635	0	4.93928	8.68123	42.1247	381.588	0	1.91441	1.88388	0	middle
120	128	aof-miR398_1ss21GT	TGTGTTCTCAGGTCGCCCCTT	21	chr8	-	262029957	262030134	ttccccaaaggagtggaatctgagaacacagttacactgagagaatctgctacaagtacaaagggacagtgcagcTGTGTTCTCAGGTCGCCCCTTTGGGtttcattgctctcagcatcttcatttctcgacccgagttttctcttagggtgcgtttggctgggtgcagttggatctg	53	aof-MIR398,aof-MIR12143,osa-MIR398b,osa-MIR398a,bdi-MIR398a,bdi-MIR398b,sbi-MIR398,zma-MIR398b,zma-MIR398a,tae-MIR398,ata-MIR398f,ata-MIR398g,mtr-MIR398b,mtr-MIR398c,mtr-MIR398a,gma-MIR398d,gma-MIR398c,gma-MIR398a,gma-MIR398b,ptc-MIR398b,ptc-MIR398c,ptc-MIR398a,ath-MIR398a,mdm-MIR398b,mdm-MIR398c,mdm-MIR398a,lja-MIR398,gra-MIR398,aly-MIR398a,ppe-MIR398a,ppe-MIR398b,mes-MIR398,vvi-MIR398c,vvi-MIR3…	aof-MIR398	aagcaaacggagatgagctccgactggagcgacctgctgacacatggttccggcaatgaattccgacgaaggtccaTGTGTTCTCAGGTCGCCCCTGccgggcctaatctccaccgcttctg	aof-miR398	TGTGTTCTCAGGTCGCCCCTG	5'	Diff	gp2a	...((((((((.(((..((((((((((((((((.(((((........(((.....)))........))))).))))))))))))))))))).)))))))).((((((((.((((((............(((((((((....)))...)))).))....)))))).)))).))))....	97	49.4	-72.2	0.8	175	2.5	17.5	0	7	6.5	61.5	625.5	0	3.5	5.5	0	65.8501	5.91497	16.7635	0	4.93928	8.68123	42.1247	381.588	0	1.91441	1.88388	0	middle
120	129	osa-MIR398a-p3_1ss11AG	TTCTCAGGTCGCCCCTTTGGG	21	chr8	-	262029957	262030134	ttccccaaaggagtggaatctgagaacacagttacactgagagaatctgctacaagtacaaagggacagtgcagcTGTGTTCTCAGGTCGCCCCTTTGGGtttcattgctctcagcatcttcatttctcgacccgagttttctcttagggtgcgtttggctgggtgcagttggatctg	53	aof-MIR398,aof-MIR12143,osa-MIR398b,osa-MIR398a,bdi-MIR398a,bdi-MIR398b,sbi-MIR398,zma-MIR398b,zma-MIR398a,tae-MIR398,ata-MIR398f,ata-MIR398g,mtr-MIR398b,mtr-MIR398c,mtr-MIR398a,gma-MIR398d,gma-MIR398c,gma-MIR398a,gma-MIR398b,ptc-MIR398b,ptc-MIR398c,ptc-MIR398a,ath-MIR398a,mdm-MIR398b,mdm-MIR398c,mdm-MIR398a,lja-MIR398,gra-MIR398,aly-MIR398a,ppe-MIR398a,ppe-MIR398b,mes-MIR398,vvi-MIR398c,vvi-MIR3…	osa-MIR398a	gctgaacccagaggagtggtactgagaacacaggtgccaatacaatgtatggtgagctactgtataatggagtaattctgtaacTGTGTTCTCAGGTCACCCCTTtgggtttctt	osa-MIR398a-p3	TTCTCAGGTCACCCCTTtggg	3'	New	gp2a	...((((((((.(((..((((((((((((((((.(((((........(((.....)))........))))).))))))))))))))))))).)))))))).((((((((.((((((............(((((((((....)))...)))).))....)))))).)))).))))....	97	49.4	-72.2	0.8	0	0	0	0	0	0	0	17	0	0	0	0	0	0	0	0	0	0	0	10.3709	0	0	0	0	middle
121	130	osa-miR399j	TGCCAAAGGAGAGTTGCCCTA	21	chr2	-	173247086	173247214	agcaagccagtcttagggcttctctcttttggcaggagatgtatatgaatgagagtcatgatctccattatgctcaatgctcatttagcagccccTGCCAAAGGAGAGTTGCCCTAtgactggcttaat	8	osa-MIR399j,ptc-MIR399i,mdm-MIR399d,stu-MIR399i,csi-MIR399b,cme-MIR399b,sly-MIR399,aqc-MIR399,	osa-MIR399j	agtccagtttcagggctcctctctcttggcagggagcatgtgaagtcttttgtagctcactcattttcagccctcTGCCAAAGGAGAGTTGCCCTAaaactggact	osa-miR399j	TGCCAAAGGAGAGTTGCCCTA	3'	Yes	gp2a	...(((((((((.((((((..(((((((((((((((...(((...((((((((((.((((((....))))))))).....))))))))))...)))))))))))))))..)))))).)))))))))...	123	45.7	-68.6	1.2	67	0	17	0	0	0	17	47	0	0	7	0	25.2112	0	16.2846	0	0	0	11.6442	28.6725	0	0	2.39767	0	middle
122	131	osa-miR399a	TGCCAAAGGAGAATTGCCCTG	21	chr3	+	224915149	224915255	ctgtgtggtttaagaatgactgggcaattctcctttggcagagagttcaatgttgatttctccttctcTGCCAAAGGAGAATTGCCCTGccatccgaatccacaagt	28	osa-MIR399c,osa-MIR399a,osa-MIR399b,bdi-MIR399b,bdi-MIR399c,sbi-MIR399c,sbi-MIR399h,sbi-MIR399j,sbi-MIR399a,zma-MIR399c,zma-MIR399a,zma-MIR399h,ata-MIR399a,ata-MIR399b,gma-MIR399i,ptc-MIR399f,ptc-MIR399g,mdm-MIR399c,mdm-MIR399a,mdm-MIR399b,ppe-MIR399b,mes-MIR399a,vvi-MIR399a,vvi-MIR399h,csi-MIR399c,lus-MIR399b,lus-MIR399d,vun-MIR399b,	osa-MIR399b	gtgagaatcacagtgcgattctcctctggcatggcatgagaggcctaaaaaagagacgcactgccgTGCCAAAGGAGAATTGCCCTGccattcagaa	osa-miR399a	TGCCAAAGGAGAATTGCCCTG	3'	Yes	gp2a	...(((((.((..(.(((...((((((((((((((((((((((((..................))))))))))))))))))))))))...))))..)).)))))...	101	45.8	-52.3	1.1	47	0	7	0	7	0	0	98	0	0	0	0	17.6855	0	6.70541	0	4.93928	0	0	59.7852	0	0	0	0	middle
123	132	bdi-miR399d	TGCCAAAGGAGATTTGCCCGG	21	chr9	-	158756583	158756716	aatgtggagttgtattactgggtaaatcctcctctggcagttggtcggctactcattaccggtttacttaaatgattagttagcctggatcacgacTGCCAAAGGAGATTTGCCCGGcaattcacctccactcg	22	bdi-MIR399d,ptc-MIR399b,ath-MIR399f,aly-MIR399a,aly-MIR399h,mes-MIR399d,mes-MIR399g,mes-MIR399b,mes-MIR399c,vvi-MIR399e,csi-MIR399a,csi-MIR399e,lus-MIR399c,lus-MIR399e,lus-MIR399a,cme-MIR399c,bna-MIR399a,bna-MIR399b,cas-MIR399b,rco-MIR399c,rco-MIR399b,ssl-MIR399,	bdi-MIR399d	tgcgtgtgaaggtgcattgcagggcaactcctccgttggcagagggacgacggatggatgtggccggggttctcccttgaatccttggtcctgtccgtcTGCCAAAGGAGATTTGCCCGGcgattcaccacccacttcgact	bdi-miR399d	TGCCAAAGGAGATTTGCCCGG	3'	Yes	gp2a	...((((((.((.(((.(((((((((((.((((.(((((((((((..((((.(((((...((....))..))))).))))..)))........)))))))).))))))))))))))).))).)).))))))...	128	47	-60.4	1	23	0	23	0	0	0	0	0	0	0	0	0	8.65459	0	22.0321	0	0	0	0	0	0	0	0	0	middle
124	133	aof-miR477a_1ss21GA	ACTCTCCCTCAAGGGCTTCCA	21	chr1	+	2606486	2606575	atggcatttatgttccACTCTCCCTCAAGGGCTTCCAtggcattaactagctagggaggcctttgttggagagtggagtatatatgtgat	6	aof-MIR477a,mdm-MIR477b,ppe-MIR477,mes-MIR477i,aqc-MIR477b,aqc-MIR477e,	aof-MIR477a	gtggttgctcACTCTCCCTCAAGGGCTTCCGactcagccattattaatgcgggattgtgcaacgagagtttgattggcataagttggaagctcttgtttgggtggggtggggggggattgaacagcctct	aof-miR477a	ACTCTCCCTCAAGGGCTTCCG	5'	Diff	gp2a	...((((.(((..((((((((((..(((((((((((.((((........)))).)))))))))))..))))))))))..))).))))...	84	45.6	-51.3	1.2	13	0	0	0	5	0	0	5	0	0	48	9	4.89172	0	0	0	3.52806	0	0	3.05027	0	0	16.4412	10.2745	middle
125	134	aof-miR477a_2ss8CT21GT	ACTCTCCTTCAAGGGCTTCCT	21	chr11	+	198826863	198826968	cacggcatcttttgttcACTCTCCTTCAAGGGCTTCCTacaacacccgtgtgtattgaagggcgattagggaaggtcttgtcggagagtgaacaatgcatgccatg	2	aof-MIR477a,mes-MIR477i,	aof-MIR477a	gtggttgctcACTCTCCCTCAAGGGCTTCCGactcagccattattaatgcgggattgtgcaacgagagtttgattggcataagttggaagctcttgtttgggtggggtggggggggattgaacagcctct	aof-miR477a	ACTCTCCCTCAAGGGCTTCCG	5'	Diff	gp2a	...(((((...(((((((((((((..((((..((((((......(((............)))......))))))..))))..)))))))))))))...)))))...	100	50	-48.8	0.9	27	0	0	0	7	0	0	14	0	12	119	0	10.1597	0	0	0	4.93928	0	0	8.54075	0	6.5637	40.7604	0	middle
126	135	ppe-miR477-5p_R-1_1ss20TA	ACTCTCCCTCAAAGGCTTCAA	21	chr3	-	320208740	320208819	ggctcACTCTCCCTCAAAGGCTTCAAatgttgcttcatatatatgaaggttgtattgaagcttttggaggagattggatg	1	ppe-MIR477,	ppe-MIR477	aaggcatttttgttgctcACTCTCCCTCAAAGGCTTCTAGcaatgtcagaaatggcgagctCGAAGCCTTTGGGGAGAGTAAacaaaaaatgtctt	ppe-miR477-5p	ACTCTCCCTCAAAGGCTTCTAG	5'	Diff	gp2a	...(((.(((((..((((((((((((......((((((....))))))......))))))))))))..))))).)))...	74	41.2	-32.6	1	0	0	0	0	0	0	0	0	0	0	5	0	0	0	0	0	0	0	0	0	0	0	1.71262	0	low
127	136	aof-MIR479-p5_2ss12TG22TG	TGTGATGTTGGGTCGGCTCATG	22	chr4	+	12140727	12140859	agaagaagaagaagacgacatggTGTGATGTTGGGTCGGCTCATGgcgcattgtagtttcagtgatgcgattaacaagacaaaaagatcgaTGAGCCGGACCAATATCACTCatgtactcttcattctctacc	9	aof-MIR479,osa-MIR171h,sbi-MIR171e,sbi-MIR171f,zma-MIR171h,zma-MIR171k,ata-MIR171a,vvi-MIR171a,nta-MIR479a,	aof-MIR479	gaagaagaagaagagggcgacatggtgtgatgttggttcggctcatttttttaattttatgaagatagaaaTGAGCCGAACCAATATCACTCatgtattcttcattcgagcatgcac	aof-MIR479-p5	tgtgatgttggttcggctcatt	5'	New	gp2a	...((.(((((((((..((((((.((((((((((..((((((((.((((((((......))))).))).........((........)).))))))))..))))))))))))))))..))))).))))))...	127	44.4	-54.1	0.9	471.5	29.5	135.5	5	12	3.5	152.5	107	6.5	204	798.5	20	177.419	69.7966	129.798	22.6129	8.46734	4.67451	104.456	65.2757	31.6462	111.583	273.505	22.8322	middle
127	137	aof-miR479_1ss8AG	TGAGCCGGACCAATATCACTC	21	chr4	+	12140727	12140859	agaagaagaagaagacgacatggTGTGATGTTGGGTCGGCTCATGgcgcattgtagtttcagtgatgcgattaacaagacaaaaagatcgaTGAGCCGGACCAATATCACTCatgtactcttcattctctacc	9	aof-MIR479,osa-MIR171h,sbi-MIR171e,sbi-MIR171f,zma-MIR171h,zma-MIR171k,ata-MIR171a,vvi-MIR171a,nta-MIR479a,	aof-MIR479	gaagaagaagaagagggcgacatggtgtgatgttggttcggctcatttttttaattttatgaagatagaaaTGAGCCGAACCAATATCACTCatgtattcttcattcgagcatgcac	aof-miR479	TGAGCCGAACCAATATCACTC	3'	Diff	gp2a	...((.(((((((((..((((((.((((((((((..((((((((.((((((((......))))).))).........((........)).))))))))..))))))))))))))))..))))).))))))...	127	44.4	-54.1	0.9	1091	128.5	447	306	1467.5	486.5	555	1277	15	7880	10782.5	194	410.529	304.029	428.188	1383.91	1035.49	649.757	380.15	779.038	73.0297	4310.16	3693.27	221.472	high
128	136	aof-MIR479-p5_2ss12TG22TG	TGTGATGTTGGGTCGGCTCATG	22	unanchor316	-	1152811	1152943	agaagaagaagaagacgacatggTGTGATGTTGGGTCGGCTCATGgcgcattgtagtttcagtgatgcgattaacaagacaaaaagatcgaTGAGCCGGACCAATATCACTcatgtactcttcattctctacc	11	aof-MIR479,osa-MIR171h,sbi-MIR171f,sbi-MIR171e,zma-MIR171k,zma-MIR171h,ata-MIR171a,mes-MIR171l,vvi-MIR479,vvi-MIR171a,nta-MIR479a,	aof-MIR479	gaagaagaagaagagggcgacatggtgtgatgttggttcggctcatttttttaattttatgaagatagaaaTGAGCCGAACCAATATCACTCatgtattcttcattcgagcatgcac	aof-MIR479-p5	tgtgatgttggttcggctcatt	5'	New	gp2a	...((.(((((((((..((((((.((((((((((..((((((((.((((((((......))))).))).........((........)).))))))))..))))))))))))))))..))))).))))))...	127	44.4	-54.1	0.9	471.5	29.5	135.5	5	12	3.5	152.5	107	6.5	204	798.5	20	177.419	69.7966	129.798	22.6129	8.46734	4.67451	104.456	65.2757	31.6462	111.583	273.505	22.8322	middle
128	138	aof-miR479_R-1_1ss8AG	TGAGCCGGACCAATATCACT	20	unanchor316	-	1152811	1152943	agaagaagaagaagacgacatggTGTGATGTTGGGTCGGCTCATGgcgcattgtagtttcagtgatgcgattaacaagacaaaaagatcgaTGAGCCGGACCAATATCACTcatgtactcttcattctctacc	11	aof-MIR479,osa-MIR171h,sbi-MIR171f,sbi-MIR171e,zma-MIR171k,zma-MIR171h,ata-MIR171a,mes-MIR171l,vvi-MIR479,vvi-MIR171a,nta-MIR479a,	aof-MIR479	gaagaagaagaagagggcgacatggtgtgatgttggttcggctcatttttttaattttatgaagatagaaaTGAGCCGAACCAATATCACTCatgtattcttcattcgagcatgcac	aof-miR479	TGAGCCGAACCAATATCACTC	3'	Diff	gp2a	...((.(((((((((..((((((.((((((((((..((((((((.((((((((......))))).))).........((........)).))))))))..))))))))))))))))..))))).))))))...	127	44.4	-54.1	0.9	5.5	6.5	7	8.5	13.5	7	18	13	0	123	133	117	2.06958	15.3789	6.70541	38.442	9.52576	9.34902	12.3292	7.93069	0	67.2779	45.5557	133.568	middle
129	139	aof-miR479_L-1_1ss8AG	GAGCCGGACCAATATCACTC	20	unanchor581	-	228816	228923	agaagaagaagaagacatgagtgattttggtatggctcatttcatttaggatttgtgcctagttgtatatGAGCCGGACCAATATCACTCaggtatgcttcttctgtt	16	aof-MIR479,osa-MIR171h,sbi-MIR171f,sbi-MIR171e,zma-MIR171k,zma-MIR171h,ata-MIR171a,mdm-MIR171i,lja-MIR171c,stu-MIR479,nta-MIR479a,nta-MIR479b,lus-MIR171h,cme-MIR171g,bra-MIR171b,bna-MIR171a,	aof-MIR479	gaagaagaagaagagggcgacatggtgtgatgttggttcggctcatttttttaattttatgaagatagaaaTGAGCCGAACCAATATCACTCatgtattcttcattcgagcatgcac	aof-miR479	TGAGCCGAACCAATATCACTC	3'	Diff	gp2a	...((((((((...((.((((((((.(((((..(((((((..((..((((.......))))..))...)))))))..))))).)))))))).))...))))))))...	102	38.9	-48.9	1.2	4	0	0	3	24	10	0	3	0	113	174.5	0	1.50515	0	0	13.5678	16.9347	13.3557	0	1.83016	0	61.8082	59.7705	0	middle
130	140	osa-miR528-5p_1ss16GA	TGGAAGGGGCATGCAAAGGAG	21	chr1	-	15095791	15095912	agatcgaagcttggtgatagcagtagcagTGGAAGGGGCATGCAGAGGAGatagttttgtgctgtatccataatctcctctgtattcctcctccactcctgctgccatccctccattgacag	8	osa-MIR528,bdi-MIR528,sbi-MIR528,zma-MIR528b,zma-MIR528a,ata-MIR528,vca-MIR528,ssp-MIR528,	osa-MIR528	agTGGAAGGGGCATGCAGAGGAGcaggagattcagtttgaagctggacttcacttttgcctctctctCCTGTGCTTGCCTCTTCCATT	osa-miR528-5p	TGGAAGGGGCATGCAGAGGAG	5'	Diff	gp2a	...((((.....((.(((.(((((((.((((((.((((.(((((((((((((.....((((.......))))))))))))))))).)))).)))))).))))))).)))))....))))...	116	50	-55.3	0.9	86	3	6	2.5	68.5	55	21	16	0	5	7	0	32.3606	7.09796	5.7475	11.3065	48.3344	73.4566	14.384	9.76085	0	2.73488	2.39767	0	middle
131	140	osa-miR528-5p_1ss16GA	TGGAAGGGGCATGCAAAGGAG	21	chr5	-	233832987	233833117	agagatctaagctttggtgatagcagtagcagTGGAAGGGGCATGCAGAGGAGataattttgtgcagtatccctaatctcctctgtattcctcctccactcatgctgccagattagtagggttagattgga	8	osa-MIR528,bdi-MIR528,sbi-MIR528,zma-MIR528a,zma-MIR528b,ata-MIR528,vca-MIR528,ssp-MIR528,	osa-MIR528	agTGGAAGGGGCATGCAGAGGAGcaggagattcagtttgaagctggacttcacttttgcctctctctCCTGTGCTTGCCTCTTCCATT	osa-miR528-5p	TGGAAGGGGCATGCAGAGGAG	5'	Diff	gp2a	...(((((((.(((...((((.((((((..((((((.((((.(((((((((((((....................))))))))))))).)))).))))))..))))))...))))..))).)))))))...	125	45.8	-53.3	0.9	86	3	6	2.5	68.5	55	21	16	0	5	7	0	32.3606	7.09796	5.7475	11.3065	48.3344	73.4566	14.384	9.76085	0	2.73488	2.39767	0	middle
132	141	osa-miR528-5p_1ss21GA	TGGAAGGGGCATGCAGAGGAA	21	chr4	-	298758338	298758429	atagcagtagcagTGGAAGGGGCATGCAGAGGAGataattttgtgctgtatccataatctcctctgtattcctcctccactcctgctgccag	8	osa-MIR528,bdi-MIR528,sbi-MIR528,zma-MIR528b,zma-MIR528a,ata-MIR528,vca-MIR528,ssp-MIR528,	osa-MIR528	agTGGAAGGGGCATGCAGAGGAGcaggagattcagtttgaagctggacttcacttttgcctctctctCCTGTGCTTGCCTCTTCCATT	osa-miR528-5p	TGGAAGGGGCATGCAGAGGAG	5'	Diff	gp2a	...(((((((.((((((.((((.(((((((((((((.....((((.......))))))))))))))))).)))).)))))).)))))))...	86	48.9	-48.8	1.1	42.5	2.5	0	0	4.5	4	3	6.5	0	0	0	0	15.9922	5.91497	0	0	3.17525	5.3423	2.05486	3.96535	0	0	0	0	middle
133	142	osa-miR528-5p	TGGAAGGGGCATGCAGAGGAG	21	chr5	+	15775335	15775465	agagatctaagctttggtgatatcagtagcagTGGAAGGGGCATGCAGAGGAGataattttgtgatgtatccataatctcctctgtattcctccttcactcctgctgccagattagtagggttagattgga	8	osa-MIR528,bdi-MIR528,sbi-MIR528,zma-MIR528b,zma-MIR528a,ata-MIR528,vca-MIR528,ssp-MIR528,	osa-MIR528	agTGGAAGGGGCATGCAGAGGAGcaggagattcagtttgaagctggacttcacttttgcctctctctCCTGTGCTTGCCTCTTCCATT	osa-miR528-5p	TGGAAGGGGCATGCAGAGGAG	5'	Yes	gp2a	...(((((((.(((...((((..((((((.((((((.((((.(((((((((((((.....((((.......))))))))))))))))).)))).)))))).))))))....))))..))).)))))))...	125	43.5	-53.1	0.9	6942.5	551	1500.5	109	1537.5	2147.5	1525	1805.5	70	301.5	223.5	6	2612.37	1303.66	1437.35	492.962	1084.88	2868.14	1044.56	1101.45	340.805	164.913	76.5541	6.84966	high
134	142	osa-miR528-5p	TGGAAGGGGCATGCAGAGGAG	21	chr8	+	131792162	131792253	atagcagtagcagTGGAAGGGGCATGCAGAGGAGataattttgtgctgtatccataatctcctctgtattcctcctccactcctgctgccag	8	osa-MIR528,bdi-MIR528,sbi-MIR528,zma-MIR528a,zma-MIR528b,ata-MIR528,vca-MIR528,ssp-MIR528,	osa-MIR528	agTGGAAGGGGCATGCAGAGGAGcaggagattcagtttgaagctggacttcacttttgcctctctctCCTGTGCTTGCCTCTTCCATT	osa-miR528-5p	TGGAAGGGGCATGCAGAGGAG	5'	Yes	gp2a	...(((((((.((((((.((((.(((((((((((((.....((((.......))))))))))))))))).)))).)))))).)))))))...	86	48.9	-48.8	1.1	6942.5	551	1500.5	109	1537.5	2147.5	1525	1805.5	70	301.5	223.5	6	2612.37	1303.66	1437.35	492.962	1084.88	2868.14	1044.56	1101.45	340.805	164.913	76.5541	6.84966	high
135	143	aof-MIR536-p5_1ss12GT	CGCACATGGCGTGGGACGATC	21	chr8	+	181679786	181679907	gtagatatagagctagggattgcttggttgagaCGCACATGGCGTGGGACGATCaccgttgaggagtccgaTCGTGCCACGCTGTGTGCGTCtcaactatctatccctttttctccatcgtc	1	aof-MIR536,	aof-MIR536	gaagaagatcgaagaataagagatgagtgcatttgagacgcacatggcgggggacgatcactgttgaggttccggTCGTGCCACGCTGTGTGCGTCtcaaccgctctctctgattgtccatctgtttctatttctaaagcgaagaagaaga	aof-MIR536-p5	cgcacatggcgggggacgatc	5'	New	gp2a	...(((..((((..((((((....(((((((((((((((..((((((.((((((.((.....)).....)))))).))))))..)))))))))))))))...))))))..))))..)))...	116	52.5	-69.2	1.1	119	6	23	0	6	0	44	39	0	0	0	0	44.7781	14.1959	22.0321	0	4.23367	0	30.138	23.7921	0	0	0	0	middle
135	144	aof-miR536_1ss15GT	TCGTGCCACGCTGTTTGCGTC	21	chr8	+	181679786	181679907	gtagatatagagctagggattgcttggttgagaCGCACATGGCGTGGGACGATCaccgttgaggagtccgaTCGTGCCACGCTGTGTGCGTCtcaactatctatccctttttctccatcgtc	1	aof-MIR536,	aof-MIR536	gaagaagatcgaagaataagagatgagtgcatttgagacgcacatggcgggggacgatcactgttgaggttccggTCGTGCCACGCTGTGTGCGTCtcaaccgctctctctgattgtccatctgtttctatttctaaagcgaagaagaaga	aof-miR536	TCGTGCCACGCTGTGTGCGTC	3'	Diff	gp2a	...(((..((((..((((((....(((((((((((((((..((((((.((((((.((.....)).....)))))).))))))..)))))))))))))))...))))))..))))..)))...	116	52.5	-69.2	1.1	82	0	6	0	10	0	61	43	0	0	0	0	30.8555	0	5.7475	0	7.05612	0	41.7822	26.2323	0	0	0	0	middle
136	145	aof-miR827_1ss8AG	TTAGATGGCCATCAACAAACA	21	chr1	-	97201096	97201244	gactgcaacctgtgaatgtgttctgttgattgtcatctaaacattcctccattccgattttcaaatttttatttaaaattttattcttacggtatggatattgaatctatggTTAGATGACCATCAACAAACAccttcatagggcatgc	11	aof-MIR827,ath-MIR827,gra-MIR827b,aly-MIR827,ppe-MIR827,mes-MIR827,csi-MIR827,cas-MIR827a,ghr-MIR827b,ghr-MIR827c,ghr-MIR827a,	aof-MIR827	acttttgaatgtgtcatgttgatggtcatctaacaatcatctcaaatataatatcttataaagattaaaactcattgTTAGATGACCATCAACAAACActttcagagg	aof-miR827	TTAGATGACCATCAACAAACA	3'	Diff	gp2a	...(((..((((((((.(((((.(((((((.(((((((((.(((((.(((((.(((......(((((((.....)))))))........))).)))))....))....))).))))))))).)))))))))))).)))))))))))...	143	34.2	-49.4	1	1774.5	431	697.5	28	82.5	15	1431	2602	83	142	482.5	191	667.72	1019.74	668.146	126.632	58.213	20.0336	980.17	1587.36	404.098	77.6705	165.268	218.048	high
137	145	aof-miR827_1ss8AG	TTAGATGGCCATCAACAAACA	21	unanchor179	-	591820	591939	ttttgaatgtgttctgttgattgtcatctaatcattcttccattctaatttccattttttttttttatggtatggatattgaatctatggTTAGATGACCATCAACAAACAccttcatag	12	aof-MIR827,ath-MIR827,gra-MIR827b,aly-MIR827,ppe-MIR827,mes-MIR827,csi-MIR827,cas-MIR827a,cas-MIR827b,ghr-MIR827a,ghr-MIR827c,ghr-MIR827b,	aof-MIR827	acttttgaatgtgtcatgttgatggtcatctaacaatcatctcaaatataatatcttataaagattaaaactcattgTTAGATGACCATCAACAAACActttcagagg	aof-miR827	TTAGATGACCATCAACAAACA	3'	Diff	gp2a	...((((.(((((.(((((((.(((((((((((((......((((.(((.(((((................))))).)))))))..))))))))))))).)))))))))))).))))...	114	29.2	-40.3	1.2	1774.5	431	697.5	28	82.5	15	1431	2602	83	142	482.5	191	667.72	1019.74	668.146	126.632	58.213	20.0336	980.17	1587.36	404.098	77.6705	165.268	218.048	high
138	146	aof-miR827	TTAGATGACCATCAACAAACA	21	chr11	+	206691942	206692072	gctacttttgaatgtgttcttgttgatggtcatctaatcattcttccaatcaatctcatatttacatcttttctttatgggattttgaagctatggTTAGATGACCATCAACAAACAccttcaaaggttcg	8	aof-MIR827,gra-MIR827b,ppe-MIR827,mes-MIR827,csi-MIR827,ghr-MIR827a,ghr-MIR827c,ghr-MIR827b,	aof-MIR827	acttttgaatgtgtcatgttgatggtcatctaacaatcatctcaaatataatatcttataaagattaaaactcattgTTAGATGACCATCAACAAACActttcagagg	aof-miR827	TTAGATGACCATCAACAAACA	3'	Yes	gp2a	...(((((((((.((((..((((((((((((((((((((((.((((.....(((((((((...............)))))))))..))))..)))))))))))))))))))))))))).)))))))))...	125	34.4	-57	1.3	659	236.5	358	12	70	26	664	1536.5	44.5	54	102.5	86	247.973	559.556	342.934	54.271	49.3928	34.7249	454.81	937.347	216.655	29.5367	35.1087	98.1785	high
139	146	aof-miR827	TTAGATGACCATCAACAAACA	21	chr2	+	355953276	355953391	ttttgaatgtgttctgttgattgtcatctaatcattcttccattctaatttccattttttttatggtatggatattgaatctatggTTAGATGACCATCAACAAACAccttcatag	11	aof-MIR827,ath-MIR827,gra-MIR827b,aly-MIR827,ppe-MIR827,mes-MIR827,csi-MIR827,cas-MIR827a,ghr-MIR827c,ghr-MIR827b,ghr-MIR827a,	aof-MIR827	acttttgaatgtgtcatgttgatggtcatctaacaatcatctcaaatataatatcttataaagattaaaactcattgTTAGATGACCATCAACAAACActttcagagg	aof-miR827	TTAGATGACCATCAACAAACA	3'	Yes	gp2a	...((((.(((((.(((((((.(((((((((((((..(((...((((....((((.......))))..))))....)))...))))))))))))).)))))))))))).))))...	110	30.2	-40.9	1.2	659	236.5	358	12	70	26	664	1536.5	44.5	54	102.5	86	247.973	559.556	342.934	54.271	49.3928	34.7249	454.81	937.347	216.655	29.5367	35.1087	98.1785	high
140	147	aof-miR827_R-1	TTAGATGACCATCAACAAAC	20	chr3	+	279365893	279366023	gctacttttgaatgtgttcttgttgatggtcatctaatcattcttccaatcaatctcatatttacatcttttctttatgggattttgaagctatggTTAGATGACCATCAACAAACaccttcaaacgttcg	11	aof-MIR827,ath-MIR827,gra-MIR827b,aly-MIR827,ppe-MIR827,mes-MIR827,csi-MIR827,cas-MIR827a,ghr-MIR827a,ghr-MIR827c,ghr-MIR827b,	aof-MIR827	acttttgaatgtgtcatgttgatggtcatctaacaatcatctcaaatataatatcttataaagattaaaactcattgTTAGATGACCATCAACAAACActttcagagg	aof-miR827	TTAGATGACCATCAACAAACA	3'	Diff	gp2a	...((.((((((.((((..((((((((((((((((((((((.((((.....(((((((((...............)))))))))..))))..)))))))))))))))))))))))))).)))))).))...	125	34.4	-53.2	1.2	10	10	6.5	0	18.5	5	21	37	2.5	8	14	21	3.76287	23.6599	6.22645	0	13.0538	6.67787	14.384	22.572	12.1716	4.3758	4.79534	23.9738	middle
141	148	aof-MIR827-p3_1ss18TC	TGACCATCAACAAACACCTTC	21	chr6	+	283824791	283824917	ctacttttgaatgtgttcttgttgatggtcatctaatcattcttccaacctatctcacatcttcattttctatatgggattttgaagctatggttagaTGACCATCAACAAACACCTTCaaaggctt	6	aof-MIR827,gra-MIR827b,mes-MIR827,ghr-MIR827a,ghr-MIR827c,ghr-MIR827b,	aof-MIR827	acttttgaatgtgtcatgttgatggtcatctaacaatcatctcaaatataatatcttataaagattaaaactcattgTTAGATGACCATCAACAAACActttcagagg	aof-MIR827-p3	TGACCATCAACAAACActttc	3'	New	gp2a	...((((((((.((((..((((((((((((((((((((((.((((......((((((.................))))))...))))..)))))))))))))))))))))))))).))))))))...	121	35.4	-51.9	1.2	0	0	0	0	0	0	0	3	0	0	0	2.5	0	0	0	0	0	0	0	1.83016	0	0	0	2.85402	low
142	149	aof-miR827_1ss1TG	GTAGATGACCATCAACAAACA	21	chr6	-	130708883	130709013	gctacttttgaatgtgttcttgttgatggtcatctaatcattcgtccaatcaatctcatatttacatcttttctttatgggattctgaagctatggTTAGATGACCATCAACAAACAccttcaaaggttcg	12	aof-MIR827,ath-MIR827,gra-MIR827b,aly-MIR827,ppe-MIR827,mes-MIR827,csi-MIR827,cas-MIR827a,cas-MIR827b,ghr-MIR827c,ghr-MIR827b,ghr-MIR827a,	aof-MIR827	acttttgaatgtgtcatgttgatggtcatctaacaatcatctcaaatataatatcttataaagattaaaactcattgTTAGATGACCATCAACAAACActttcagagg	aof-miR827	TTAGATGACCATCAACAAACA	3'	Diff	gp2a	...(((((((((.((((..((((((((((((((((((((((...((.....(((((((((...............)))))))))..))....)))))))))))))))))))))))))).)))))))))...	125	35.9	-53.8	1.1	11	0	0	0	0	0	0	16	0	0	0	0	4.13915	0	0	0	0	0	0	9.76085	0	0	0	0	low
143	150	ath-miR828_2ss11AG17AG	TCTTGCTTAAGTGAGTGTTCCA	22	chr4	+	12884269	12884399	ctatctaccctcccattggaggaccTCTTGCTTAAGTGAGTGTTCCAttaaccaagcttgatcattgtcgatctgagttctccaaaatggacgctcattggggcaagatgtcttgcattgggagcagaaac	3	ath-MIR828,aly-MIR828,cas-MIR828,	ath-MIR828	gtgacaaagtcacaaaagtgataaactctcctttccactttctaatgttTCTTGCTTAAATGAGTATTCCAtgtaaaaatgattcactcactcgtatgggtgggttgggttttctcttcatgagatgctcatttgagcaagcaatgtttggaagtgggactatttaatatcatgtatgagttttatctttt	ath-miR828	TCTTGCTTAAATGAGTATTCCA	5'	Diff	gp2a	...(((...((((((.((.(((((.(((((((..(((((((((.(((((.....(((((((((......)))).)))))......))))))))))))))..))))))).))))).)).)))))).)))...	125	46.6	-57.3	0.9	695.5	150	315.5	4.5	18.5	6.5	463.5	57.5	50.5	132	52.5	3.5	261.707	354.898	302.222	20.3516	13.0538	8.68123	317.476	35.0781	245.867	72.2007	17.9825	3.99563	middle
144	150	ath-miR828_2ss11AG17AG	TCTTGCTTAAGTGAGTGTTCCA	22	chr4	+	12926313	12926433	accctcccattggaggaccTCTTGCTTAAGTGAGTGTTCCAttaaccaagcttgatcattgtcgatctgagttctccaaaatggacgctcattggggcaagatgtcttgcattgggagcag	3	ath-MIR828,aly-MIR828,cas-MIR828,	ath-MIR828	gtgacaaagtcacaaaagtgataaactctcctttccactttctaatgttTCTTGCTTAAATGAGTATTCCAtgtaaaaatgattcactcactcgtatgggtgggttgggttttctcttcatgagatgctcatttgagcaagcaatgtttggaagtgggactatttaatatcatgtatgagttttatctttt	ath-miR828	TCTTGCTTAAATGAGTATTCCA	5'	Diff	gp2a	...((((((.((.(((((.(((((((..(((((((((.(((((.....(((((((((......)))).)))))......))))))))))))))..))))))).))))).)).))))))...	115	47.9	-56.6	1	695.5	150	315.5	4.5	18.5	6.5	463.5	57.5	50.5	132	52.5	3.5	261.707	354.898	302.222	20.3516	13.0538	8.68123	317.476	35.0781	245.867	72.2007	17.9825	3.99563	middle
145	151	lus-miR828a	TCTTGCTCAAATGAGTGTTCCA	22	chr5	+	14491710	14491836	taccctcccataggaggaccTCTTGCTCAAATGAGTGTTCCAttaaccgtacgtgctcgatcgttgtcgatctgagttctcgaaaatggacgctcattcgggcaagatgtcttgcactgggaggaga	1	lus-MIR828a,	lus-MIR828a	gttgttagtagatgaatcacctcttgtggtaaacgttTCTTGCTCAAATGAGTGTTCCAaaaccagcaagcgatggagcagttctgggttcaaatactccatctgttgtttgcatctgagatgctcatttgggcaagcagtgtttcacaaagaggtgtctgttgatttc	lus-miR828a	TCTTGCTCAAATGAGTGTTCCA	5'	Yes	gp2a	...(((((((....(((((.((((((((.(((((((((.(((((...((.....(((((((((....))))).))))...))..)))))))))))))).)))))))).)))))....)))))))...	121	50.4	-61.2	1	821	254	195.5	4	27.5	9	532	214.5	108.5	53.5	384	12.5	308.931	600.961	187.273	18.0903	19.4043	12.0202	364.396	130.856	528.248	29.2632	131.529	14.2701	high
146	152	mes-miR828a_L+3_1ss20AG	ACCTCTTGCTCAAATGAGTGTTCCA	25	chr5	+	14506754	14506876	taccctcccataggaggACCTCTTGCTCAAATGAGTGTTCCAttaaccgtgctcgatcgttgtcgatctgagttctccaaaatggacgctcattcgggcaagatgtcttgcactgggaggaga	2	mes-MIR828b,lus-MIR828a,	mes-MIR828b	cccttccataggaaggccTCTTGCTCAAATGAGTATTCCAcaatcttcttagaggaagacataattttccacttaaacgtcgtttcaatagtttaccttcatttctttcagtagtcagtctctctaacagttggaatggatactcatttaggcaagatgctttgcatgagaggg	mes-miR828a	TCTTGCTCAAATGAGTATTCCA	5'	Diff	gp2a	...(((((((....(((((.((((((((.(((((((((.(((((......(((((((((....))))).)))).......)))))))))))))).)))))))).)))))....)))))))...	117	50.4	-60.4	1	16.5	0	0	0	0	0	5.5	0	0	0	2.5	0	6.20873	0	0	0	0	0	3.76725	0	0	0	0.85631	0	low
147	153	mes-miR828a_L+1_1ss18AG	CTCTTGCTCAAATGAGTGTTCCA	23	chr5	+	14530560	14530682	taccctcccataggaggacCTCTTGCTCAAATGAGTGTTCCAttaacagtgctcgatcgttgtcgatctgagttctcaaaaatggacgctcattcgggcaagatgtcttgcatttggaggaga	2	mes-MIR828b,lus-MIR828a,	mes-MIR828b	cccttccataggaaggccTCTTGCTCAAATGAGTATTCCAcaatcttcttagaggaagacataattttccacttaaacgtcgtttcaatagtttaccttcatttctttcagtagtcagtctctctaacagttggaatggatactcatttaggcaagatgctttgcatgagaggg	mes-miR828a	TCTTGCTCAAATGAGTATTCCA	5'	Diff	gp2a	...(((((......(((((.((((((((.(((((((((.(((((...((..((((((((....))))).)))..))....)))))))))))))).)))))))).)))))......)))))...	117	47.2	-55.7	1	5	0	0	0	0	0	0	0	0	0	0	0	1.88143	0	0	0	0	0	0	0	0	0	0	0	low
148	154	mes-miR828a_1ss17AG	TCTTGCTCAAATGAGTGTTCCA	22	chr5	+	14602060	14602182	taccctcccaagggaggaccTCTTGCTCAAATGAGTGTTCCAttaaccgtgctcgatcgttgtcgatctgagttctccaaaatggacgctcattcgggcaagatgtcctgcgttgggaggaga	2	mes-MIR828b,lus-MIR828a,	mes-MIR828b	cccttccataggaaggccTCTTGCTCAAATGAGTATTCCAcaatcttcttagaggaagacataattttccacttaaacgtcgtttcaatagtttaccttcatttctttcagtagtcagtctctctaacagttggaatggatactcatttaggcaagatgctttgcatgagaggg	mes-miR828a	TCTTGCTCAAATGAGTATTCCA	5'	Diff	gp2a	...((((((((...(((((.((((((((.(((((((((.(((((......(((((((((....))))).)))).......)))))))))))))).)))))))).)))))...))))))))...	117	52	-64.3	1	821	254	195.5	4	27.5	9	532	214.5	108.5	53.5	384	12.5	308.931	600.961	187.273	18.0903	19.4043	12.0202	364.396	130.856	528.248	29.2632	131.529	14.2701	high
149	155	mtr-MIR2592bi-p3_2ss8TC19AT_1	ATTCCCACTGTCCCTGTCT	19	chr4	+	230587863	230588045	ttgccaagcacgttcccttggctgtggtttcgctcaatagtagacagagacagtgggaatcttattaatccattcatgcctcgtcatctaattagtgatgagcatgaatggattaacgatATTCCCACTGTCCCTGTCTactatccagcgaaaccacagccaagggaacgggcttggcagaat	2	mtr-MIR2592bi,mtr-MIR2592bj,	mtr-MIR2592bi	ccaatattcgacccgcattcccattgtccctgtcaaaagattaaattcttgttagtccggtttaaatgaaggtattgaagtgtcaaggaatgaacctcattcttttcacacttaaataccgtcatttaaaccaaacctaacaagaatttaatcttttgaaTGGAACATTGGGAATGCCGGTcgtatattgg	mtr-MIR2592bi-p3	attcccattgtccctgtca	3'	New	gp2a	(((((((((.((((((((((((((((((((((((..(((((((((((.((((((((((((.(..(((((((((((((((.(((((((.......))))))))))))))))))))))..).)))))))))))).)))))))))))..)))))))))))))))))))))))).)))))))))...	180	46.4	-138	1.6	20	9	21	0	70	14	8	37	0	45	90	12	7.52573	21.2939	20.1162	0	49.3928	18.698	5.47964	22.572	0	24.6139	30.8272	13.6993	middle
150	156	stu-MIR6027-p3_2ss2GT18TG_2	TTGAGAATTCAAAGAGTGAG	20	chr11	+	63109302	63109387	taaattcctcactctttaaattctcaactataactaatcatcatgatgattagttatagTTGAGAATTCAAAGAGTGAGgaatcta	1	stu-MIR6027,	stu-MIR6027	tttcataattttacatgattatgggtagcacaaggattaatgtgaaacaaataagtgatatgtgaagaacattggagaattcaaagagttagttgttaggaagaaaacactttgtgtttctcgTGAATCCTTCGGCTATCCATAAtcatgttgaatgtgtgactt	stu-MIR6027-p3	tggagaattcaaagagttag	3'	New	gp2a	...((((((((((((((.(((((((((((((((((((((((....))))))))))))))))))))))).))))))))))))))...	80	27.9	-53.9	2.2	0	0	0	0	0	0	0	0	0	0	0	43.5	0	0	0	0	0	0	0	0	0	0	0	49.66	middle
151	157	stu-MIR6027-p3_2ss2GT18TG_1	TTGAGAATTCAAAGAGTG	18	chr5	+	176860144	176860229	taaattcctcactctttaaattctcaactataactaatcatcatgatgattagttatagTTGAGAATTCAAAGAGTGaggaatcta	1	stu-MIR6027,	stu-MIR6027	tttcataattttacatgattatgggtagcacaaggattaatgtgaaacaaataagtgatatgtgaagaacattggagaattcaaagagttagttgttaggaagaaaacactttgtgtttctcgTGAATCCTTCGGCTATCCATAAtcatgttgaatgtgtgactt	stu-MIR6027-p3	tggagaattcaaagagtt	3'	New	gp2a	...((((((((((((((.(((((((((((((((((((((((....))))))))))))))))))))))).))))))))))))))...	80	27.9	-53.9	2.2	0	0	0	0	0	0	0	0	0	0	0	43.5	0	0	0	0	0	0	0	0	0	0	0	49.66	middle
152	158	ptc-miR6478_R-1_1ss20TA	CCGACCTTAGCTCAGTTGGA	20	chr2	+	341452770	341452849	aatCCGACCTTAGCTCAGTTGGAagagtaaggggttgataatgccccttggttgctggttcaactccggcaggtcggccc	1	ptc-MIR6478,	ptc-MIR6478	aCCGACCTTAGCTCAGTTGGTGgagcggagggctgtaggtcgctggttggattccggcaaggtcggatttcaattttgtaatttcttttctcaccgaccttagttcagaagttgcattgttttgtctgttgaggtggt	ptc-miR6478	CCGACCTTAGCTCAGTTGGTG	5'	Diff	gp2a	...(((((((..(((.(((((((..((((((((((.......))))))....))))..)))))))..))))))))))...	74	55	-34	0.8	0	0	0	7	26	0	0	0	0	0	84	7	0	0	0	31.6581	18.3459	0	0	0	0	0	28.772	7.99127	middle
153	159	ptc-MIR7840-p5_2ss10CA19GA	AGAGACAGAAACACAAAGAAA	21	chr2	-	160677294	160677409	aaAGAGAGAGAAACACAAAGAAAgacagagaaagtggttattgttcggcacaaaaatcgaggagtcggtttgcattttttttaacaaatagttctttttgtgacttctcttttctc	1	ptc-MIR7840,	ptc-MIR7840	ttatagtgctCAAGGAGTAATTAGTGACATCttattaattacatcctaagctcatcttgaagaaagagacagacacacaaaggaaagagaaaatgaaactcatggcccatcaaaagcgattagaataaccctacctaagatatctctcttgtacttgtatctatttttttttaaagtggatcaaaggactagctaataagatgtcactagttacttcttcaacaccataaa	ptc-MIR7840-p5	agagacagacacacaaaggaa	5'	New	gp2a	...(((((((((.((((((((..(((((((((((((....((((.....))))(((((((....))))))).))))))))))........))).))))))))..)))))))))...	110	34.5	-25.1	0.6	0	0	0	0	0	0	0	10	0	0	0	0	0	0	0	0	0	0	0	6.10053	0	0	0	0	low
154	160	gra-MIR8665-p5_2ss12TC17GC	TTTGGTAATCTCTATTCTT	19	chr8	+	258195501	258195690	tcggatcctgctgaacttggttgtgttgatgattagtaattgtaatttcaaTTTGGTAATCTCTATTCTTtgcaaagaatagagattggtaattataatttagtaattgtaattgtaattgcaaagaatagagattaccaaattgaaattacaattactaatcatcaacacaaccaagttcagcaggatc	1	gra-MIR8665,	gra-MIR8665	caattgattaatttttggtgtttatgagattaaatgatgatttggtaatctttattgttaattaggattattttgtacaggaattttggttagttttgaacctagggcctaatttgaaattatgtaaaaatttagcatattaattgtgaagaattcgaatggtaaaggctgctttggggtgttattgaatttagttggaagtattagaggttaaaagtgaaaatttaaaatattttggtgttaaggactaaattgaataaagtgtaaaattgtaaaaaatgaaatttaaggggcatatgcatagaaataaacttaataatgtatttgaattgaataaattgaatTTAATTATTATATAGATCAAGGATtgaacggtac	gra-MIR8665-p5	tttggtaatctttattgtt	5'	New	gp2a	...((((((((((((((((((((((((((((((((((((((((((((((((((((((((((((((((((((((((..(((....)))..(((((((((((....)))))))))))...))))))))))))))))))))))))))))))))))))))))))))))))))))))))))))))))))))))))	187	29.5	-124.3	2.2	0	0	0	0	0	2.5	0	0	0	0	2.5	2.5	0	0	0	0	0	3.33893	0	0	0	0	0.85631	2.85402	low
155	160	gra-MIR8665-p5_2ss12TC17GC	TTTGGTAATCTCTATTCTT	19	chr8	-	258195573	258195762	tcggatcctgctgaacttggttgtgttgatgattagtaattgtaatttcaaTTTGGTAATCTCTATTCTTtgcaattacaattacaattactaaattataattaccaatctctattctttgcaaagaatagagattaccaaattgaaattacaattactaatcatcaacacaaccaagttcagcaggatc	1	gra-MIR8665,	gra-MIR8665	caattgattaatttttggtgtttatgagattaaatgatgatttggtaatctttattgttaattaggattattttgtacaggaattttggttagttttgaacctagggcctaatttgaaattatgtaaaaatttagcatattaattgtgaagaattcgaatggtaaaggctgctttggggtgttattgaatttagttggaagtattagaggttaaaagtgaaaatttaaaatattttggtgttaaggactaaattgaataaagtgtaaaattgtaaaaaatgaaatttaaggggcatatgcatagaaataaacttaataatgtatttgaattgaataaattgaatTTAATTATTATATAGATCAAGGATtgaacggtac	gra-MIR8665-p5	tttggtaatctttattgtt	5'	New	gp2a	...((((((((((((((((((((((((((((((((((((((((((((((((((((((((((((((((((((((((....(((((.((((....)))).)))))...............))))))))))))))))))))))))))))))))))))))))))))))))))))))))))))))))))))))))	187	29.5	-118.5	2.1	0	0	0	0	0	2.5	0	0	0	0	2.5	2.5	0	0	0	0	0	3.33893	0	0	0	0	0.85631	2.85402	low
156	161	aof-miR12143_L-1R-1_1ss2CT	TGGGTGCAGTTGGATCTGC	19	chr3	+	254745295	254745483	tgttctcaggtcgctcctttcggttcccgttgctctccgatccaattttctcttagggtgtgtttggtTGGGTGCAGTTGGATCTGCagccgatttccgatcacatgcaattccaaaatttggctacaacaacaatgagctaaggagctgcatgcagatcaaactacacccatctaaacacactcttag	25	aof-MIR12143,osa-MIR398a,bdi-MIR398a,bdi-MIR398b,mtr-MIR398a,gma-MIR398a,gma-MIR398b,ptc-MIR398a,ath-MIR398a,mdm-MIR398a,lja-MIR398,gra-MIR398,aly-MIR398a,vvi-MIR398a,nta-MIR398,csi-MIR398a,csi-MIR398b,cme-MIR398b,sly-MIR398a,cas-MIR398b,ghr-MIR398,rco-MIR398a,aqc-MIR398a,ahy-MIR398,bol-MIR398a,	aof-MIR12143	gagcgtccggTCGGGTGCAGTTGGATCTGCGatgcgttttcagttttaacaaacggatgtaactggatttgtataaccaggtcctactacacccaaccaaacgctcccaacgtgctgaagatatctaaggttggttccggtaaacgcaaactacgaagaggtaatatcgctatgttgaaaactacattattttccgaagactttattttattttccgagctatgtgctgagtatattagctgatccacttgggcccgtatcggatggaa	aof-miR12143	TCGGGTGCAGTTGGATCTGCG	5'	Diff	gp2a	........(((((.......(((...)))........))))).........((.(((((((((((((.((((((.((((.(((((((....((((...))))..(((((..(((.....((((((.((.......)))))))))))..)))))))))))).)))).)))))).))))))))))))).))	138	46.6	-66.7	0.8	0	0	0	0	0	0	0	32	0	0	0	0	0	0	0	0	0	0	0	19.5217	0	0	0	0	middle
157	161	aof-miR12143_L-1R-1_1ss2CT	TGGGTGCAGTTGGATCTGC	19	chr7	+	218828612	218828719	gcTGGGTGCAGTTGGATCTGCagccgatttccgatcacatgcaattccaaaaattggctacaacaacaatgagctagggagttgcatgcagatcaaactgcacccatc	1	aof-MIR12143,	aof-MIR12143	gagcgtccggTCGGGTGCAGTTGGATCTGCGatgcgttttcagttttaacaaacggatgtaactggatttgtataaccaggtcctactacacccaaccaaacgctcccaacgtgctgaagatatctaaggttggttccggtaaacgcaaactacgaagaggtaatatcgctatgttgaaaactacattattttccgaagactttattttattttccgagctatgtgctgagtatattagctgatccacttgggcccgtatcggatggaa	aof-miR12143	TCGGGTGCAGTTGGATCTGCG	5'	Diff	gp2a	..(((((((((((.(((((((....((((...))))..((((((((((.....((((((.((.......))))))))))))))))))))))))).)))))))))))..	104	48.1	-50.7	1	0	0	0	0	0	0	0	32	0	0	0	0	0	0	0	0	0	0	0	19.5217	0	0	0	0	middle
1	1	cca-MIR156b-p3_2ss8TA19GC	CACTTGTAGGACTTATGCC	19	chr1	+	182573174	182573214	cccggtctactcctcaaagCACTTGTAGGACTTATGCCtca	1	cca-MIR156b,	cca-MIR156b	aagaaagcTGACAGAAGAGAGTGAGCATAtgcaaagcaattgtatagagaactatacacttgttggacttatgcgtgtgctcacttctcttgctgtcagcta	cca-MIR156b-p3	cacttgttggacttatgcg	3'	New	gp2b	...(((....(((((((.....))).)))).....)))...	35	51.2	-7.2	0.3	0	0	0	0	0	0	0	0	0	0	0	9.5	0	0	0	0	0	0	0	0	0	0	0	10.8453	middle
2	1	cca-MIR156b-p3_2ss8TA19GC	CACTTGTAGGACTTATGCC	19	chr8	+	130941209	130941245	ataggtcattgttgcCACTTGTAGGACTAATGCCaac	1	cca-MIR156b,	cca-MIR156b	aagaaagcTGACAGAAGAGAGTGAGCATAtgcaaagcaattgtatagagaactatacacttgttggacttatgcgtgtgctcacttctcttgctgtcagcta	cca-MIR156b-p3	cacttgttggacttatgcg	3'	New	gp2b	...((.(((((...((.......))..)))))))...	31	43.2	-6.7	0.4	0	0	0	0	0	0	0	0	0	0	0	9.5	0	0	0	0	0	0	0	0	0	0	0	10.8453	middle
3	2	cca-MIR156c-p3_2ss7CT17AC	AGAGCATTGAGAGGACCT	18	chr11	+	112172139	112172263	ggggctgtagtatgttccaagggttgggctgttcgcccattaaagcggtacgtgagctgggttcagaacgtcgtgagacagttcggtccatatccggtgcgggcgttAGAGCATTGAGAGGACCT	1	cca-MIR156c,	cca-MIR156c	ggatgTTGACAGAAGATAGAGAGCACtgagaggacatgaagtgcatatatataatgcacctcgcttctttgtgctctttatacttctgtcattaccct	cca-MIR156c-p3	AGAGCACtgagaggacat	3'	New	gp2b	((..(........)..))..(((((((((.....)))).((((.((...((((..(((((((...(((((((....))).)))).......)))))))....))))....)).))))...)))))	78	56	-42.5	0.6	7.5	0	0	0	0	0	0	14	0	0	0	0	2.82215	0	0	0	0	0	0	8.54075	0	0	0	0	low
4	2	cca-MIR156c-p3_2ss7CT17AC	AGAGCATTGAGAGGACCT	18	chr8	+	200092134	200092258	ggggctataatatgttccaagggttgggctgttcacccattaaagcggtacgtgagctgggttcagaacgtcgtgagacagttcggtccatatccggtgcgggcgttAGAGCATTGAGAGGACCT	1	cca-MIR156c,	cca-MIR156c	ggatgTTGACAGAAGATAGAGAGCACtgagaggacatgaagtgcatatatataatgcacctcgcttctttgtgctctttatacttctgtcattaccct	cca-MIR156c-p3	AGAGCACtgagaggacat	3'	New	gp2b	((..(........)..))..((((((((.......))).((((.((...((((..(((((((...(((((((....))).)))).......)))))))....))))....)).))))...)))))	78	53.6	-38.5	0.6	7.5	0	0	0	0	0	0	14	0	0	0	0	2.82215	0	0	0	0	0	0	8.54075	0	0	0	0	low
5	3	aof-miR156c	TGACAGAAGAGAGAGAGCAC	20	chr4	+	113731729	113731860	ccaagaatcagtagtTGACAGAAGAGAGAGAGCACgccgaaaatccggtgcgccttccaagttagaagcaggaacagaagcttcaatacctgcaaacataatgaaagctaatgtgagaatactgaatttggt	26	aof-MIR156c,osa-MIR156k,bdi-MIR156a,bdi-MIR156j,sbi-MIR156d,zma-MIR156j,far-MIR529,far-MIR156a,far-MIR156b,mtr-MIR156a,gma-MIR156b,gma-MIR156f,ath-MIR156j,ath-MIR156i,mdm-MIR156u,mdm-MIR156v,mdm-MIR156w,mdm-MIR156t,mes-MIR156k,vvi-MIR156h,cas-MIR156j,cas-MIR156i,rco-MIR156e,aqc-MIR529,ahy-MIR156a,ahy-MIR156c,	aof-MIR156c	ctgcactataTGACAGAAGAGAGAGAGCACagcccgacaccggcgaaaagggcgtcgctgttgctgggtctgggctctcttatctttctgtcatatacaatat	aof-miR156c	TGACAGAAGAGAGAGAGCAC	5'	Yes	gp2b	(((((..((((((.((.(((..((...(((.((.(((((......))))).)))))...........(((((....((....))....)))))..............))..))).))..)))))).))))).	131	43.2	-33.1	0.6	42	0	7	0	13	0	37.5	288.5	0	4	3	0	15.804	0	6.70541	0	9.17296	0	25.6858	176	0	2.1879	1.02757	0	middle
6	3	aof-miR156c	TGACAGAAGAGAGAGAGCAC	20	chr7	+	6207176	6207237	gtgatggcagagaTGACAGAAGAGAGAGAGCACagtcccttcttttgaaaaactggcatatt	24	aof-MIR156c,osa-MIR156k,bdi-MIR156j,bdi-MIR156a,sbi-MIR156d,zma-MIR156j,far-MIR529,far-MIR156a,far-MIR156b,mtr-MIR156a,gma-MIR156f,gma-MIR156b,ath-MIR156j,mdm-MIR156t,mdm-MIR156w,mdm-MIR156u,mdm-MIR156v,mes-MIR156k,cas-MIR156j,cas-MIR156i,rco-MIR156e,aqc-MIR529,ahy-MIR156a,ahy-MIR156c,	aof-MIR156c	ctgcactataTGACAGAAGAGAGAGAGCACagcccgacaccggcgaaaagggcgtcgctgttgctgggtctgggctctcttatctttctgtcatatacaatat	aof-miR156c	TGACAGAAGAGAGAGAGCAC	5'	Yes	gp2b	...(((.(((......(((((((.((.((......)).))))))))).....))).)))...	56	43.5	-12.5	0.5	42	0	7	0	13	0	37.5	288.5	0	4	3	0	15.804	0	6.70541	0	9.17296	0	25.6858	176	0	2.1879	1.02757	0	middle
7	4	aof-MIR159-p5_2ss1TC19TA	CTGCATGACTCAGGAGCTACAT	22	chr1	-	84505424	84505491	CTGCATGACTCAGGAGCTACATaaacccaagcctggtccttgTTTGGATTGAAGGGAGCTCTACaaca	73	aof-MIR159,osa-MIR159a,osa-MIR159f,osa-MIR159d,osa-MIR159e,osa-MIR159b,osa-MIR159c,bdi-MIR159a,bdi-MIR159b,sbi-MIR159b,sbi-MIR159a,zma-MIR159f,zma-MIR159j,zma-MIR159d,zma-MIR159a,zma-MIR159c,zma-MIR159b,zma-MIR159k,tae-MIR159a,tae-MIR159b,hvu-MIR159a,hvu-MIR159b,vca-MIR159,sof-MIR159c,sof-MIR159d,sof-MIR159e,sof-MIR159a,sof-MIR159b,far-MIR159,ssp-MIR159a,mtr-MIR159a,gma-MIR159a,gma-MIR159e,ptc-MI…	aof-MIR159	cataaaattgtaggttttaagagtggagctccttgaagtccaaatatgggtattggaggggtggatcgagctgctttgtcatggattccactgccctattcctatatgttattttcatcttgagagaaaaaaaaaggagggggggagaaagaaaaagatcatgttcatgggataggtttgtggcttgcatgactcaggagcttcattaacctcttcttacccttcTTTGGATTGAAGGGAGCTCTAcacgttaatctttctaattttttct	aof-MIR159-p5	ttgcatgactcaggagcttcat	5'	New	gp2b	............((((((.....((.((((((.........)))))).))......))))))......	50	48.5	-13.9	0.4	0	0	0	0	0	5	0	0	0	5	0	0	0	0	0	0	0	6.67787	0	0	0	2.73488	0	0	low
7	5	aof-miR159_R+1	TTTGGATTGAAGGGAGCTCTAA	22	chr1	-	84505424	84505491	CTGCATGACTCAGGAGCTACATaaacccaagcctggtccttgTTTGGATTGAAGGGAGCTCTACaaca	73	aof-MIR159,osa-MIR159a,osa-MIR159f,osa-MIR159d,osa-MIR159e,osa-MIR159b,osa-MIR159c,bdi-MIR159a,bdi-MIR159b,sbi-MIR159b,sbi-MIR159a,zma-MIR159f,zma-MIR159j,zma-MIR159d,zma-MIR159a,zma-MIR159c,zma-MIR159b,zma-MIR159k,tae-MIR159a,tae-MIR159b,hvu-MIR159a,hvu-MIR159b,vca-MIR159,sof-MIR159c,sof-MIR159d,sof-MIR159e,sof-MIR159a,sof-MIR159b,far-MIR159,ssp-MIR159a,mtr-MIR159a,gma-MIR159a,gma-MIR159e,ptc-MI…	aof-MIR159	cataaaattgtaggttttaagagtggagctccttgaagtccaaatatgggtattggaggggtggatcgagctgctttgtcatggattccactgccctattcctatatgttattttcatcttgagagaaaaaaaaaggagggggggagaaagaaaaagatcatgttcatgggataggtttgtggcttgcatgactcaggagcttcattaacctcttcttacccttcTTTGGATTGAAGGGAGCTCTAcacgttaatctttctaattttttct	aof-miR159	TTTGGATTGAAGGGAGCTCTA	3'	Diff	gp2b	............((((((.....((.((((((.........)))))).))......))))))......	50	48.5	-13.9	0.4	1549.5	169.5	457.5	79.5	589	119.5	758.5	1238	60.5	1013.5	1877.5	148	583.056	401.035	438.247	359.546	415.606	159.601	519.538	755.246	294.553	554.359	643.089	168.958	high
8	6	aof-MIR159-p5_2ss10GC21AC	GAGCTCCTTCAAGTCCAAATC	21	chr10	+	122195928	122196033	agagaaaaagcagatatccttagttgctggggtttgaagtgGAGCTCCTTCAAGTCCAAATCagggtcttgaaggggtgcatcgAGCTGCTTAGTCATGGATTCta	4	aof-MIR159,gma-MIR159a,mes-MIR159b,hbr-MIR159a,	aof-MIR159	cataaaattgtaggttttaagagtggagctccttgaagtccaaatatgggtattggaggggtggatcgagctgctttgtcatggattccactgccctattcctatatgttattttcatcttgagagaaaaaaaaaggagggggggagaaagaaaaagatcatgttcatgggataggtttgtggcttgcatgactcaggagcttcattaacctcttcttacccttcTTTGGATTGAAGGGAGCTCTAcacgttaatctttctaattttttct	aof-MIR159-p5	gagctccttgaagtccaaata	5'	New	gp2b	...((..((((((..(((((........)))))((((.((...((((((((((((((......))).))))))))))))).)))).))))))..))..........	52	46.2	-35	0.7	39.5	3	21	0	0	0	20.5	27	0	7.5	50	12.5	14.8633	7.09796	20.1162	0	0	0	14.0416	16.4714	0	4.10231	17.1262	14.2701	middle
8	7	aof-MIR159-p3_1ss9TA	AGCTGCTTAGTCATGGATTC	20	chr10	+	122195928	122196033	agagaaaaagcagatatccttagttgctggggtttgaagtgGAGCTCCTTCAAGTCCAAATCagggtcttgaaggggtgcatcgAGCTGCTTAGTCATGGATTCta	4	aof-MIR159,gma-MIR159a,mes-MIR159b,hbr-MIR159a,	aof-MIR159	cataaaattgtaggttttaagagtggagctccttgaagtccaaatatgggtattggaggggtggatcgagctgctttgtcatggattccactgccctattcctatatgttattttcatcttgagagaaaaaaaaaggagggggggagaaagaaaaagatcatgttcatgggataggtttgtggcttgcatgactcaggagcttcattaacctcttcttacccttcTTTGGATTGAAGGGAGCTCTAcacgttaatctttctaattttttct	aof-MIR159-p3	agctgctttgtcatggattc	3'	New	gp2b	...((..((((((..(((((........)))))((((.((...((((((((((((((......))).))))))))))))).)))).))))))..))..........	52	46.2	-35	0.7	1452	157	630	107	480	193	921	1018	215	3240	7718	2427	546.368	371.46	603.487	483.917	338.694	257.766	630.843	621.034	1046.76	1772.2	2643.6	2770.69	high
9	6	aof-MIR159-p5_2ss10GC21AC	GAGCTCCTTCAAGTCCAAATC	21	chr11	-	137577443	137577483	gGAGCTCCTTCAAGTCCAAATCagggtcttgaaggggcgta	1	aof-MIR159,	aof-MIR159	cataaaattgtaggttttaagagtggagctccttgaagtccaaatatgggtattggaggggtggatcgagctgctttgtcatggattccactgccctattcctatatgttattttcatcttgagagaaaaaaaaaggagggggggagaaagaaaaagatcatgttcatgggataggtttgtggcttgcatgactcaggagcttcattaacctcttcttacccttcTTTGGATTGAAGGGAGCTCTAcacgttaatctttctaattttttct	aof-MIR159-p5	gagctccttgaagtccaaata	5'	New	gp2b	...((((((((((((((......))).)))))))))))...	35	53.7	-22.1	1	39.5	3	21	0	0	0	20.5	27	0	7.5	50	12.5	14.8633	7.09796	20.1162	0	0	0	14.0416	16.4714	0	4.10231	17.1262	14.2701	middle
10	8	mdm-MIR159b-p5_1ss1TG	GGCTGCTGGTTCATGGATACC	21	chr11	-	201891970	201892104	GGCTGCTGGTTCATGGATACCttttggtacacctagggttagggtgtagctcaatgggtttgcatgactcaggagacgattttgcccttgtcctttttttctatttctcatgTTTGGATTGAAGGGAGCTCCAac	83	aof-MIR159,aof-MIR319b,osa-MIR159c,osa-MIR159a,osa-MIR159d,osa-MIR159e,osa-MIR159f,osa-MIR159b,bdi-MIR159b,bdi-MIR159a,sbi-MIR159b,sbi-MIR159a,zma-MIR159d,zma-MIR159a,zma-MIR159f,zma-MIR159j,zma-MIR159c,zma-MIR159k,zma-MIR159b,tae-MIR159a,tae-MIR159b,hvu-MIR159a,hvu-MIR159b,vca-MIR159,sof-MIR159d,sof-MIR159c,sof-MIR159a,sof-MIR159b,sof-MIR159e,far-MIR159,ssp-MIR159a,mtr-MIR159a,mtr-MIR319c,gma-MI…	mdm-MIR159b	ggagctccctttgattcaaaagcaggagggagagagggtcttacactgctgctggttcatggatacctctggggtgcgcacggtraggaaactgcgcagtttaagggtttgcatgacccaggagatgtGAATTCCTTCTCCTCTCCTTTCTTGGATTGAAGGGAGCTCC	mdm-MIR159b-p5	tgctgctggttcatggatacc	5'	New	gp2b	((((.(((..(((((...(((..(((((((((((.......)))))).)).)))..)))...)))))..))).))...............(((((((..((((...........))))..)))))))...))...	73	45.9	-38.8	0.6	0	0	0	0	0	0	0	0	0	2.5	0	0	0	0	0	0	0	0	0	0	0	1.36744	0	0	low
10	9	aof-miR159_1ss20TC	TTTGGATTGAAGGGAGCTCCA	21	chr11	-	201891970	201892104	GGCTGCTGGTTCATGGATACCttttggtacacctagggttagggtgtagctcaatgggtttgcatgactcaggagacgattttgcccttgtcctttttttctatttctcatgTTTGGATTGAAGGGAGCTCCAac	83	aof-MIR159,aof-MIR319b,osa-MIR159c,osa-MIR159a,osa-MIR159d,osa-MIR159e,osa-MIR159f,osa-MIR159b,bdi-MIR159b,bdi-MIR159a,sbi-MIR159b,sbi-MIR159a,zma-MIR159d,zma-MIR159a,zma-MIR159f,zma-MIR159j,zma-MIR159c,zma-MIR159k,zma-MIR159b,tae-MIR159a,tae-MIR159b,hvu-MIR159a,hvu-MIR159b,vca-MIR159,sof-MIR159d,sof-MIR159c,sof-MIR159a,sof-MIR159b,sof-MIR159e,far-MIR159,ssp-MIR159a,mtr-MIR159a,mtr-MIR319c,gma-MI…	aof-MIR159	cataaaattgtaggttttaagagtggagctccttgaagtccaaatatgggtattggaggggtggatcgagctgctttgtcatggattccactgccctattcctatatgttattttcatcttgagagaaaaaaaaaggagggggggagaaagaaaaagatcatgttcatgggataggtttgtggcttgcatgactcaggagcttcattaacctcttcttacccttcTTTGGATTGAAGGGAGCTCTAcacgttaatctttctaattttttct	aof-miR159	TTTGGATTGAAGGGAGCTCTA	3'	Diff	gp2b	((((.(((..(((((...(((..(((((((((((.......)))))).)).)))..)))...)))))..))).))...............(((((((..((((...........))))..)))))))...))...	73	45.9	-38.8	0.6	924	288.5	219.5	93	1125	302	527	542.5	51.5	639	1332	174.5	347.689	682.587	210.263	420.601	793.814	403.343	360.971	330.954	250.735	349.517	456.242	199.211	high
11	10	osa-MIR159e-p5_2ss18AC21AC	TTTGCATGACTCGGGAGCTGC	21	chr2	+	368722727	368722924	agctgcttggtcatggatcccactgccctattccattattgtttggaattgggatagggttagtggTTTGCATGACTCGGGAGCTGCattaacccaagcttgttccttgTTTGGATTGAAGGGAGCTCCacaacacctacacttttctcttagatctctttaatttcttgtttctgttgctgtttttctttcttcttg	70	aof-MIR159,osa-MIR159e,osa-MIR159c,osa-MIR159d,osa-MIR159b,osa-MIR159a,osa-MIR159f,bdi-MIR159b,bdi-MIR159a,sbi-MIR159b,sbi-MIR159a,zma-MIR159c,zma-MIR159d,zma-MIR159k,zma-MIR159b,zma-MIR159f,zma-MIR159j,zma-MIR159a,tae-MIR159b,tae-MIR159a,hvu-MIR159b,hvu-MIR159a,vca-MIR159,sof-MIR159c,sof-MIR159a,sof-MIR159b,sof-MIR159d,far-MIR159,ssp-MIR159a,mtr-MIR159a,gma-MIR159a,gma-MIR159e,ptc-MIR159d,ptc-MI…	osa-MIR159e	gatgaagaagaagagctccctttcgatccaattcaggagaggaagtggtaggatgcagctgccggttcatggatacctctggagtgcagggcaaatagtcctaccctttcatgggtttgcatgactcgggagatgaacccgccattgtcttcctctattgATTGGATTGAAGGGAGCTCCTctagctacat	osa-MIR159e-p5	tttgcatgactcgggagatga	5'	New	gp2b	((((.(..(((((((....((((((((((((((((..............))))))))))).)))))....)))))))..).))))........((((((.........))))))...((((..((...(((((((...(((..........((....)).........)))...))))).)).....))..))))...	85	42.4	-60.4	0.7	256	8	31	35	482	405	88	249	0	675	433	521	96.3293	18.9279	29.6954	158.291	340.105	540.907	60.276	151.903	0	369.208	148.313	594.779	high
11	11	aof-miR159_R-1_1ss20TC	TTTGGATTGAAGGGAGCTCC	20	chr2	+	368722727	368722924	agctgcttggtcatggatcccactgccctattccattattgtttggaattgggatagggttagtggTTTGCATGACTCGGGAGCTGCattaacccaagcttgttccttgTTTGGATTGAAGGGAGCTCCacaacacctacacttttctcttagatctctttaatttcttgtttctgttgctgtttttctttcttcttg	70	aof-MIR159,osa-MIR159e,osa-MIR159c,osa-MIR159d,osa-MIR159b,osa-MIR159a,osa-MIR159f,bdi-MIR159b,bdi-MIR159a,sbi-MIR159b,sbi-MIR159a,zma-MIR159c,zma-MIR159d,zma-MIR159k,zma-MIR159b,zma-MIR159f,zma-MIR159j,zma-MIR159a,tae-MIR159b,tae-MIR159a,hvu-MIR159b,hvu-MIR159a,vca-MIR159,sof-MIR159c,sof-MIR159a,sof-MIR159b,sof-MIR159d,far-MIR159,ssp-MIR159a,mtr-MIR159a,gma-MIR159a,gma-MIR159e,ptc-MIR159d,ptc-MI…	aof-MIR159	cataaaattgtaggttttaagagtggagctccttgaagtccaaatatgggtattggaggggtggatcgagctgctttgtcatggattccactgccctattcctatatgttattttcatcttgagagaaaaaaaaaggagggggggagaaagaaaaagatcatgttcatgggataggtttgtggcttgcatgactcaggagcttcattaacctcttcttacccttcTTTGGATTGAAGGGAGCTCTAcacgttaatctttctaattttttct	aof-miR159	TTTGGATTGAAGGGAGCTCTA	3'	Diff	gp2b	((((.(..(((((((....((((((((((((((((..............))))))))))).)))))....)))))))..).))))........((((((.........))))))...((((..((...(((((((...(((..........((....)).........)))...))))).)).....))..))))...	85	42.4	-60.4	0.7	16443.5	2623.5	6407	3141	23567	13845	8052	7020	657	24142	47765	4241	6187.47	6207.17	6137.37	14205.4	16629.2	18491	5515.25	4282.57	3198.7	13205.1	16360.7	4841.57	high
12	12	osa-MIR159c-p5_2ss13GA19TC	TTTGCATGACCCAGGAGACGA	21	chr6	-	280324780	280324921	ggctgctggttcatggataccttttggtacacctatggctagggtgtagctcaatgggTTTGCATGACCCTGGAGACGAttttgcccttgcccctttgttgtttctcatgTTTGGATTGAAGGGAGCTCCtacatctaatca	83	aof-MIR159,aof-MIR319b,osa-MIR159e,osa-MIR159c,osa-MIR159d,osa-MIR159a,osa-MIR159f,osa-MIR159b,bdi-MIR159b,bdi-MIR159a,sbi-MIR159a,sbi-MIR159b,zma-MIR159k,zma-MIR159b,zma-MIR159c,zma-MIR159j,zma-MIR159f,zma-MIR159a,zma-MIR159d,tae-MIR159b,tae-MIR159a,hvu-MIR159b,hvu-MIR159a,vca-MIR159,sof-MIR159b,sof-MIR159a,sof-MIR159d,sof-MIR159c,far-MIR159,ssp-MIR159a,mtr-MIR159a,mtr-MIR319c,gma-MIR159a,gma-MI…	osa-MIR159c	gaggaggaagaggagctcctttcgatccaattcaggagaggaagtggtaggatgcagctgccgattcatggatacctctggagtgcatggcagcaatgctgtaggcctgcacttgcatgggtttgcatgacccgggagatgaacccaccattgtcttcctctattgATTGGATTGAAGGGAGCTCCAcatctctctc	osa-MIR159c-p5	tttgcatgacccgggagatga	5'	New	gp2b	.....(((((.(((((.((((....))))...))))))))))((((((((((...(((((.....)))))..)))..............((((((((.....(((........)))..)))))).))..)))))))......	26	47.9	-39.4	0.6	66	6.5	13	10	135.5	79.5	33	14.5	0	147.5	137.5	51	24.8349	15.3789	12.4529	45.2259	95.6104	106.178	22.6035	8.84577	0	80.6788	47.0971	58.2221	middle
12	11	aof-miR159_R-1_1ss20TC	TTTGGATTGAAGGGAGCTCC	20	chr6	-	280324780	280324921	ggctgctggttcatggataccttttggtacacctatggctagggtgtagctcaatgggTTTGCATGACCCTGGAGACGAttttgcccttgcccctttgttgtttctcatgTTTGGATTGAAGGGAGCTCCtacatctaatca	83	aof-MIR159,aof-MIR319b,osa-MIR159e,osa-MIR159c,osa-MIR159d,osa-MIR159a,osa-MIR159f,osa-MIR159b,bdi-MIR159b,bdi-MIR159a,sbi-MIR159a,sbi-MIR159b,zma-MIR159k,zma-MIR159b,zma-MIR159c,zma-MIR159j,zma-MIR159f,zma-MIR159a,zma-MIR159d,tae-MIR159b,tae-MIR159a,hvu-MIR159b,hvu-MIR159a,vca-MIR159,sof-MIR159b,sof-MIR159a,sof-MIR159d,sof-MIR159c,far-MIR159,ssp-MIR159a,mtr-MIR159a,mtr-MIR319c,gma-MIR159a,gma-MI…	aof-MIR159	cataaaattgtaggttttaagagtggagctccttgaagtccaaatatgggtattggaggggtggatcgagctgctttgtcatggattccactgccctattcctatatgttattttcatcttgagagaaaaaaaaaggagggggggagaaagaaaaagatcatgttcatgggataggtttgtggcttgcatgactcaggagcttcattaacctcttcttacccttcTTTGGATTGAAGGGAGCTCTAcacgttaatctttctaattttttct	aof-miR159	TTTGGATTGAAGGGAGCTCTA	3'	Diff	gp2b	.....(((((.(((((.((((....))))...))))))))))((((((((((...(((((.....)))))..)))..............((((((((.....(((........)))..)))))).))..)))))))......	26	47.9	-39.4	0.6	16443.5	2623.5	6407	3141	23567	13845	8052	7020	657	24142	47765	4241	6187.47	6207.17	6137.37	14205.4	16629.2	18491	5515.25	4282.57	3198.7	13205.1	16360.7	4841.57	high
13	13	gma-MIR159a-p3_1ss17GC	TGAAGTGGAGCTCCTTCAAGTC	22	chr1	+	26229960	26230014	tatccttagttgctagggttTGAAGTGGAGCTCCTTCAAGTCcaaaccagggtct	3	gma-MIR159a,mes-MIR159b,hbr-MIR159a,	gma-MIR159a	aattaaaggggattatgaagtgGAGCTCCTTGAAGTCCAATTGaggatcttactgggtgaattgagctgcttagctatggatcccacagttctacccatcaataagtgcttttgtggtagtcttgtggcttccatatctggggagcttcatttgcctttatagtattaaccttcTTTGGATTGAAGGGAGCTCTAcacccttctcttcttttct	gma-MIR159a-p3	tgaagtgGAGCTCCTTGAAGTC	3'	New	gp2b	...((((.(((....((..((((((........))))))..)).))).))))...	49	47.3	-13.9	0.5	10	0	7.5	0	0	0	3.5	5.5	0	2.5	12	7.5	3.76287	0	7.18437	0	0	0	2.39734	3.35529	0	1.36744	4.11029	8.56207	low
14	14	aof-miR159_1ss7TG	TTTGGAGTGAAGGGAGCTCTA	21	chr1	-	5487219	5487295	cTTTGGAGTGAAGGGGGCTCTAtctgaacattttccccagatagtgtaggcaccaatgctgccctgttcacctacaa	31	aof-MIR159,zma-MIR159h,zma-MIR159i,vca-MIR159,mtr-MIR159a,gma-MIR159e,gma-MIR159a,ptc-MIR159b,ptc-MIR159a,ath-MIR159a,mdm-MIR159d,mdm-MIR159e,mdm-MIR159f,aly-MIR159a,ppe-MIR159,mes-MIR159a,mes-MIR159b,vvi-MIR159c,nta-MIR159,csi-MIR159a,cme-MIR159a,sly-MIR159,bra-MIR159a,bna-MIR159,cpa-MIR159a,rco-MIR159,aqc-MIR159,hbr-MIR159a,ahy-MIR159,htu-MIR159a,pvu-MIR159a,	aof-MIR159	cataaaattgtaggttttaagagtggagctccttgaagtccaaatatgggtattggaggggtggatcgagctgctttgtcatggattccactgccctattcctatatgttattttcatcttgagagaaaaaaaaaggagggggggagaaagaaaaagatcatgttcatgggataggtttgtggcttgcatgactcaggagcttcattaacctcttcttacccttcTTTGGATTGAAGGGAGCTCTAcacgttaatctttctaattttttct	aof-miR159	TTTGGATTGAAGGGAGCTCTA	5'	Diff	gp2b	...(((.(((((..((((.(((((((...........)))))))....((((....))))))))..))))))))...	71	49.4	-25.9	0.7	0	0	5.5	0	0	0	0	0	0	0	3	0	0	0	5.26854	0	0	0	0	0	0	0	1.02757	0	low
15	14	aof-miR159_1ss7TG	TTTGGAGTGAAGGGAGCTCTA	21	chr11	-	196792546	196792705	ttggggttgaaattgtaatTTTGGAGTGAAGGGGGCTCTAtctgaacattcaatcgagaagaggaagacatcaatccatgttctctgtttacctacaagaaaaacagaagtcgaaccattcagagaattgaattttacgtcaaaagaacgaaaacccatc	31	aof-MIR159,zma-MIR159i,zma-MIR159h,vca-MIR159,mtr-MIR159a,gma-MIR159a,gma-MIR159e,ptc-MIR159a,ptc-MIR159b,ath-MIR159a,mdm-MIR159f,mdm-MIR159e,mdm-MIR159d,aly-MIR159a,ppe-MIR159,mes-MIR159b,mes-MIR159a,vvi-MIR159c,nta-MIR159,csi-MIR159a,cme-MIR159a,sly-MIR159,bra-MIR159a,bna-MIR159,cpa-MIR159a,rco-MIR159,aqc-MIR159,hbr-MIR159a,ahy-MIR159,htu-MIR159a,pvu-MIR159a,	aof-MIR159	cataaaattgtaggttttaagagtggagctccttgaagtccaaatatgggtattggaggggtggatcgagctgctttgtcatggattccactgccctattcctatatgttattttcatcttgagagaaaaaaaaaggagggggggagaaagaaaaagatcatgttcatgggataggtttgtggcttgcatgactcaggagcttcattaacctcttcttacccttcTTTGGATTGAAGGGAGCTCTAcacgttaatctttctaattttttct	aof-miR159	TTTGGATTGAAGGGAGCTCTA	5'	Diff	gp2b	...(((((....((((..(((((..((((((.........((((((.......((((.........(((((......))))).(((((((..(.....)..)))))))..))))....))))))........))))))..)))))..)))).)))))...	154	38.1	-33.5	0.5	0	0	5.5	0	0	0	0	0	0	0	3	0	0	0	5.26854	0	0	0	0	0	0	0	1.02757	0	low
16	15	aof-miR159	TTTGGATTGAAGGGAGCTCTA	21	chr1	-	59595658	59595799	tgcatgactaaggagctgcattcatcctcagtaactcttcTTTGGATTGAAGGGAGCTCTAcaatatctaaaccctttcaattttttctttcttatataattccaatattgtaaaaaaaatccatcttctcttctcttcctt	72	aof-MIR159,osa-MIR159a,osa-MIR159f,osa-MIR159b,osa-MIR159d,osa-MIR159e,osa-MIR159c,bdi-MIR159b,bdi-MIR159a,sbi-MIR159a,sbi-MIR159b,zma-MIR159f,zma-MIR159j,zma-MIR159a,zma-MIR159k,zma-MIR159b,zma-MIR159d,zma-MIR159c,tae-MIR159a,tae-MIR159b,hvu-MIR159a,hvu-MIR159b,vca-MIR159,sof-MIR159d,sof-MIR159a,sof-MIR159b,sof-MIR159c,sof-MIR159e,far-MIR159,ssp-MIR159a,mtr-MIR159a,gma-MIR159a,gma-MIR159e,ptc-MI…	aof-MIR159	cataaaattgtaggttttaagagtggagctccttgaagtccaaatatgggtattggaggggtggatcgagctgctttgtcatggattccactgccctattcctatatgttattttcatcttgagagaaaaaaaaaggagggggggagaaagaaaaagatcatgttcatgggataggtttgtggcttgcatgactcaggagcttcattaacctcttcttacccttcTTTGGATTGAAGGGAGCTCTAcacgttaatctttctaattttttct	aof-miR159	TTTGGATTGAAGGGAGCTCTA	5'	Yes	gp2b	......(((.((((..........)))).)))...........(((..((((((((...((((((((......................................)))))))).............))))))))...)))..	97	33.1	-17.745	0.4	70441	6427.5	26504.5	3279.5	16590	5693	37444	43488.5	1262.5	52905.5	99562.5	3103	26506	15207.4	25389.1	14831.8	11706.1	7603.42	25647.4	26530.3	6146.67	28938	34102.6	3542.42	high
17	15	aof-miR159	TTTGGATTGAAGGGAGCTCTA	21	chr6	+	260199307	260199481	tcatgaaagagagagttggagagaattagagagaaatttgtcatgggataggtttgtggtgtgcatgactttggagctggcatttaccctctctaactcttaTTTGGATTGAAGGGAGCTCTAcatctaacccctcttaatttttttttatttcctttatttttcttcatcagtt	70	aof-MIR159,osa-MIR159f,osa-MIR159d,osa-MIR159a,osa-MIR159b,osa-MIR159e,osa-MIR159c,bdi-MIR159a,bdi-MIR159b,sbi-MIR159b,sbi-MIR159a,zma-MIR159j,zma-MIR159f,zma-MIR159a,zma-MIR159d,zma-MIR159k,zma-MIR159b,zma-MIR159c,tae-MIR159a,tae-MIR159b,hvu-MIR159a,hvu-MIR159b,vca-MIR159,sof-MIR159d,sof-MIR159c,sof-MIR159b,sof-MIR159a,far-MIR159,ssp-MIR159a,mtr-MIR159a,gma-MIR159a,gma-MIR159e,ptc-MIR159a,ptc-MI…	aof-MIR159	cataaaattgtaggttttaagagtggagctccttgaagtccaaatatgggtattggaggggtggatcgagctgctttgtcatggattccactgccctattcctatatgttattttcatcttgagagaaaaaaaaaggagggggggagaaagaaaaagatcatgttcatgggataggtttgtggcttgcatgactcaggagcttcattaacctcttcttacccttcTTTGGATTGAAGGGAGCTCTAcacgttaatctttctaattttttct	aof-miR159	TTTGGATTGAAGGGAGCTCTA	3'	Yes	gp2b	...(((..((((((..(..((.(((.((((((((((((......(((.((((..(((((.((........((((((..((......))..))))))(((((..........))))).)).))))))))).))).....)))))))))))).)))))..)..))))))..)))...	169	36.6	-41.4	0.6	70441	6427.5	26504.5	3279.5	16590	5693	37444	43488.5	1262.5	52905.5	99562.5	3103	26506	15207.4	25389.1	14831.8	11706.1	7603.42	25647.4	26530.3	6146.67	28938	34102.6	3542.42	high
18	16	osa-MIR159e-p5_1ss18AC	TTTGCATGACTCGGGAGCT	19	chr1	-	406392358	406392402	TTTGCATGACTCGGGAGATtatggataataccatagtatcctaaa	1	osa-MIR159e,	osa-MIR159e	gatgaagaagaagagctccctttcgatccaattcaggagaggaagtggtaggatgcagctgccggttcatggatacctctggagtgcagggcaaatagtcctaccctttcatgggtttgcatgactcgggagatgaacccgccattgtcttcctctattgATTGGATTGAAGGGAGCTCCTctagctacat	osa-MIR159e-p5	tttgcatgactcgggagat	5'	New	gp2b	............((((.(((((((......))))))).))))...	30	35.6	-11.9	0.7	0	0	0	0	0	0	0	0	0	6	0	9	0	0	0	0	0	0	0	0	0	3.28185	0	10.2745	middle
19	17	ath-miR159c_R-1_1ss5GT	TTTGTATTGAAGGGAGCTCC	20	chr1	-	456379167	456379246	tgggaggcgtgtggatgcaccaggtgtgagttcttactcgaTTTGTATTGAAGGAAGCTCCggtgcggacgaccctcagc	3	ath-MIR159c,aly-MIR159c,cas-MIR159a,	ath-MIR159c	gtgtaacagaaggagctcccttcctccaaaacgaagaggacaagatttgaggaactaaaatgcagaatctaagagttcatgtcttcctcatagagagtgcgcggtgttaaaagcttgaagaaagcacactttaaggggattgcacgacctcttagattctccctctttctctacatatcattctcttctcttcgTTTGGATTGAAGGGAGCTCCTtttcttcttc	ath-miR159c	TTTGGATTGAAGGGAGCTCCT	3'	Diff	gp2b	...((((.((.((..((((((.((.((...(((((..(((((....)))))))))))).))))))))..))))))))...	74	56.2	-27.7	0.6	5	0	0	0	5	4	0	0	0	6	10.5	0	1.88143	0	0	0	3.52806	5.3423	0	0	0	3.28185	3.5965	0	low
20	18	osa-miR159d_R-1_1ss1AG	GTTGGATTGAAGGGAGCTCC	20	chr2	-	17068768	17068811	GTTGGATTGAATGGAGCTCCtcccaaaaggaagccctttcattg	18	osa-MIR159d,osa-MIR159c,osa-MIR159e,sbi-MIR159b,zma-MIR159d,zma-MIR159c,sof-MIR159c,ptc-MIR159d,ath-MIR159c,mdm-MIR159b,mdm-MIR159a,mdm-MIR159c,aly-MIR159c,cme-MIR159b,bra-MIR319,cas-MIR159a,cpa-MIR159b,cca-MIR319,	osa-MIR159d	tgatgtgaggaggagctcctttcgatccaattcaggagaggaagtggtgggatgcagctgccggttcatggatacctctgcagttcatgccggtaggcctgcacttgcatgggtttgcatgacctgggagatgaacctgccattgtgttcctctattgATTGGATTGAAGGGAGCTCCGgctacaccta	osa-miR159d	ATTGGATTGAAGGGAGCTCCG	5'	Diff	gp2b	.......((((.((.((((((......))).))))).))))...	34	47.7	-11.7	0.6	10.5	0	4	0	16	8	0	3	0	11	22.5	0	3.95101	0	3.83166	0	11.2898	10.6846	0	1.83016	0	6.01673	7.70679	0	middle
21	19	ath-miR159c_R-1_1ss12GT	TTTGGATTGAATGGAGCTCC	20	chr3	+	269625418	269625465	ccaatgacTTTGGATTGAATGGAGCTCCgcccagaagtcagtcatcac	3	ath-MIR159c,aly-MIR159c,cas-MIR159a,	ath-MIR159c	gtgtaacagaaggagctcccttcctccaaaacgaagaggacaagatttgaggaactaaaatgcagaatctaagagttcatgtcttcctcatagagagtgcgcggtgttaaaagcttgaagaaagcacactttaaggggattgcacgacctcttagattctccctctttctctacatatcattctcttctcttcgTTTGGATTGAAGGGAGCTCCTtttcttcttc	ath-miR159c	TTTGGATTGAAGGGAGCTCCT	5'	Diff	gp2b	...((((((...((((...(((.((...)))))..))))))))))...	42	50	-11.9	0.5	4	0	0	0	4	2.5	0	0	0	6	10	0	1.50515	0	0	0	2.82245	3.33893	0	0	0	3.28185	3.42524	0	low
22	20	sbi-miR159b_R-1	CTTGGATTGAAGGGAGCTCC	20	chr5	-	82139534	82139583	ctccaataagccaagatgccggacaacgaaCTTGGATTGAATGGAGCTCC	9	sbi-MIR159b,zma-MIR159c,zma-MIR159d,sof-MIR159c,ptc-MIR159d,mdm-MIR159a,mdm-MIR159c,mdm-MIR159b,cpa-MIR159b,	sbi-MIR159b	tgaatgaagatatgaagaagaagacgacgacgatgaagaaggcgaagaaaagcgaacaaagagctcccttcgatccaatccaggaggggaagtggtcggttgcagctgccggttcatggatgcctctctggtgcagcaatgactgatgctcacctgcacttgcatgggtgtgcatgacccgggagatgaacccaccatcatctttccctcgtgCTTGGATTGAAGGGAGCTCCTctctctttctctctttctc	sbi-miR159b	CTTGGATTGAAGGGAGCTCCT	3'	Diff	gp2b	(((((.....(((((....((.....))..)))))......)))))....	46	50	-12.2	0.5	6.5	0	4	2.5	10	12.5	4.5	3	0	17	23.5	5	2.44586	0	3.83166	11.3065	7.05612	16.6947	3.0823	1.83016	0	9.29858	8.04932	5.70805	middle
23	20	sbi-miR159b_R-1	CTTGGATTGAAGGGAGCTCC	20	chr9	-	189597738	189597790	cccctccaataagacaaggtgcaggtcagcaagCTTGGATTGAATGGAGCTCC	9	sbi-MIR159b,zma-MIR159d,zma-MIR159c,sof-MIR159c,ptc-MIR159d,mdm-MIR159b,mdm-MIR159a,mdm-MIR159c,cpa-MIR159b,	sbi-MIR159b	tgaatgaagatatgaagaagaagacgacgacgatgaagaaggcgaagaaaagcgaacaaagagctcccttcgatccaatccaggaggggaagtggtcggttgcagctgccggttcatggatgcctctctggtgcagcaatgactgatgctcacctgcacttgcatgggtgtgcatgacccgggagatgaacccaccatcatctttccctcgtgCTTGGATTGAAGGGAGCTCCTctctctttctctctttctc	sbi-miR159b	CTTGGATTGAAGGGAGCTCCT	3'	Diff	gp2b	...(((((.(((..((((.(((......)))..))))..)))..)))))....	46	52.8	-14.8	0.5	6.5	0	4	2.5	10	12.5	4.5	3	0	17	23.5	5	2.44586	0	3.83166	11.3065	7.05612	16.6947	3.0823	1.83016	0	9.29858	8.04932	5.70805	middle
24	21	ptc-miR159d_L+1R-1	TCTTGGATTGAAGGGAGCTCC	21	chr7	+	150902602	150902674	gtgcttgtcaacacTCTTGGATTGAATGGAGCTCCtcccaaagagagcgtctatccgcagtgttattaggacc	5	ptc-MIR159d,mdm-MIR159b,mdm-MIR159a,mdm-MIR159c,cpa-MIR159b,	ptc-MIR159d	ttgtaaatttgggagctttctttggttcaaaatgaggaaagaaagtgggtatactcgtctgcttgttcatggatacctctgggttgcgcaggatatattagttagggctacagcttaagggtttgcatggccaaggagacgttgcctgccttctcctttcgtttCTTGGATTGAAGGGAGCTCCTacatgtatc	ptc-miR159d	CTTGGATTGAAGGGAGCTCCT	5'	Diff	gp2b	((.((((..((((((..(((((.....(((((((((.....)).)))).)))))))).))))))..)))))).	72	49.3	-19.5	0.5	0	0	0	0	0	5	0	0	0	5	0	0	0	0	0	0	0	6.67787	0	0	0	2.73488	0	0	low
25	22	aof-miR159_L+1R-1_1ss21TC	CTTTGGATTGAAGGGAGCTCC	21	chr7	-	127252755	127252856	accagcgtCTTTGGATTGAATGGAGCTCCtcccaaaagtcttgcctagcattggtaaagttcgaccgtacacataaaaaatctgagtccaattatcgctatg	30	aof-MIR159,osa-MIR159b,osa-MIR159a,sbi-MIR159a,zma-MIR159a,zma-MIR159f,tae-MIR159b,sof-MIR159b,sof-MIR159a,sof-MIR159d,sof-MIR159e,far-MIR159,ssp-MIR159a,mtr-MIR159a,gma-MIR159e,gma-MIR159a,ath-MIR159a,ath-MIR159c,ath-MIR159b,aly-MIR159b,aly-MIR159a,aly-MIR159c,lus-MIR159c,lus-MIR159b,bra-MIR159a,bna-MIR159,cas-MIR159a,cas-MIR159b,cas-MIR159c,pvu-MIR159a,	aof-MIR159	cataaaattgtaggttttaagagtggagctccttgaagtccaaatatgggtattggaggggtggatcgagctgctttgtcatggattccactgccctattcctatatgttattttcatcttgagagaaaaaaaaaggagggggggagaaagaaaaagatcatgttcatgggataggtttgtggcttgcatgactcaggagcttcattaacctcttcttacccttcTTTGGATTGAAGGGAGCTCTAcacgttaatctttctaattttttct	aof-miR159	TTTGGATTGAAGGGAGCTCTA	5'	Diff	gp2b	...((((...(((((((....((((...)))).....((((((((.......))))).....)))...................)))))))....))))...	96	43.1	-20.8	0.5	15	3.5	2.5	0	18	8	3.5	3	0	19.5	67	5.5	5.6443	8.28095	2.39479	0	12.701	10.6846	2.39734	1.83016	0	10.666	22.9491	6.27885	middle
26	23	ath-miR159c_R-1_1ss6AG	TTTGGGTTGAAGGGAGCTCC	20	chr8	-	138721280	138721323	ttcctcttcaacaaccttctggaaTTTGGGTTGAAGGGAACTCC	4	ptc-MIR319i,ath-MIR159c,aly-MIR159c,cas-MIR159a,	ath-MIR159c	gtgtaacagaaggagctcccttcctccaaaacgaagaggacaagatttgaggaactaaaatgcagaatctaagagttcatgtcttcctcatagagagtgcgcggtgttaaaagcttgaagaaagcacactttaaggggattgcacgacctcttagattctccctctttctctacatatcattctcttctcttcgTTTGGATTGAAGGGAGCTCCTtttcttcttc	ath-miR159c	TTTGGATTGAAGGGAGCTCCT	3'	Diff	gp2b	((((.(((((((..((...........)))))))))))))....	40	45.5	-12.6	0.6	0	0	0	0	6	4	0	0	0	2.5	9.5	0	0	0	0	0	4.23367	5.3423	0	0	0	1.36744	3.25398	0	low
27	24	cme-MIR160c-p5_2ss13AG17AG	AGCCATGCATGTGTAAGT	18	chr10	+	221494214	221494345	AGCCATGCATGTGTAAGTatgaacaaattcagactgtgaaactgcgaatgactcatcaaattacttatagtttgtttgatggtacgtactactcgaataaccatagtaattctagagctaatacatgcaaca	1	cme-MIR160c,	cme-MIR160c	tcatcgtaaTGCCTGGCTCCCTGTATGCCAtttgcaaagcccatcatctaaaaataggtggccttctcgaatggcatgcaaggagccatgcatgtataaatt	cme-MIR160c-p5	agccatgcatgtataaat	5'	New	gp2b	.....(((((((((.(((.((((....)))).((((((......((((((((.((((((((.((.....))..)))))))))).))).....)))......)))))).........))).)))))))))...	124	34.8	-31.5	0.7	8	3.5	6	2.5	4.5	2.5	12.5	16	7.5	9	5.5	36.5	3.01029	8.28095	5.7475	11.3065	3.17525	3.33893	8.56193	9.76085	36.5148	4.92278	1.88388	41.6688	middle
28	24	cme-MIR160c-p5_2ss13AG17AG	AGCCATGCATGTGTAAGT	18	chr5	+	144029760	144029891	AGCCATGCATGTGTAAGTatgaacaaattcagactgtgaaactgcgaatggctcatcaaatcagttatagtttgtttgatggtacgtgctactcggataaccgtagtaattctagagctaatacgtgcaaca	1	cme-MIR160c,	cme-MIR160c	tcatcgtaaTGCCTGGCTCCCTGTATGCCAtttgcaaagcccatcatctaaaaataggtggccttctcgaatggcatgcaaggagccatgcatgtataaatt	cme-MIR160c-p5	agccatgcatgtataaat	5'	New	gp2b	.....(((((((((.(((..(((((((((..((((((((....((.....))...)))...)))))..)))))))))..(((....((((((..((....))))))))...)))..))).)))))))))...	124	39.4	-33.6	0.6	8	3.5	6	2.5	4.5	2.5	12.5	16	7.5	9	5.5	36.5	3.01029	8.28095	5.7475	11.3065	3.17525	3.33893	8.56193	9.76085	36.5148	4.92278	1.88388	41.6688	middle
29	25	aof-miR160c_R-3	TGCCTGGCTCCCTGTATG	18	chr2	+	56598632	56598750	ataccgaaatgagcaTGCCTGGCTCCCTGTATGcttgcagaaatgctgcctgagggccccagaaacgggtttgagaagggcggggcaggaattgggagttggtgggattcgggtggaaa	104	aof-MIR160c,osa-MIR160d,osa-MIR160c,osa-MIR160a,osa-MIR160e,osa-MIR160b,bdi-MIR160a,bdi-MIR160c,bdi-MIR160d,bdi-MIR160f,bdi-MIR160b,sbi-MIR160b,sbi-MIR160a,sbi-MIR160e,sbi-MIR160d,sbi-MIR160c,zma-MIR160b,zma-MIR160e,zma-MIR160d,zma-MIR160c,zma-MIR160a,zma-MIR160g,zma-MIR160f,tae-MIR160,ata-MIR160a,ata-MIR160b,ata-MIR160c,far-MIR160,ttu-MIR160,mtr-MIR160a,mtr-MIR160d,mtr-MIR160b,mtr-MIR160e,gma-MI…	aof-MIR160c	ttcatgagaaTGCCTGGCTCCCTGTATGCCAcacgtgtgcactaattcttgctgcttgaatttggttactgcgggtggcgtgcgaggagccaagcattcagtaccc	aof-miR160c	TGCCTGGCTCCCTGTATGCCA	5'	Diff	gp2b	...(((...((((.....(..((((((....((((.(((....))).((((..(..(((.......)))..).....))))..))))......))))))..).....))))..)))...	113	56.3	-39.1	0.6	0	0	0	0	8	0	0	0	0	0	6	6	0	0	0	0	5.6449	0	0	0	0	0	2.05514	6.84966	low
30	26	ata-miR160b-3p_2ss8CT21AC	GCGTGCATGGATCCAAGCATC	21	chr6	+	369044	369245	tcatgtacaagaagagaaagagagaaaaagatggggaagaggatgaaaatgggaagtgcatggttccctgtgtgccacacatatagatcaatcacattaggatattggatattgtgggtgGCGTGCATGGATCCAAGCATCtctctctctctctcccacttctctctctcttgatctctcattctagtctttgctttgaatt	104	aof-MIR160c,osa-MIR160d,osa-MIR160c,osa-MIR160a,osa-MIR160b,osa-MIR160e,bdi-MIR160a,bdi-MIR160d,bdi-MIR160c,bdi-MIR160f,bdi-MIR160b,sbi-MIR160e,sbi-MIR160b,sbi-MIR160a,sbi-MIR160c,sbi-MIR160d,zma-MIR160d,zma-MIR160c,zma-MIR160e,zma-MIR160b,zma-MIR160f,zma-MIR160a,zma-MIR160g,tae-MIR160,ata-MIR160b,ata-MIR160a,ata-MIR160c,far-MIR160,ttu-MIR160,mtr-MIR160a,mtr-MIR160d,mtr-MIR160b,mtr-MIR160e,gma-MI…	ata-MIR160b	tgatatgatgTGCCTGGCTCCCTGTATGCCActcatccagagcaacaccttttgcaataaggttgcctgcgatggatgGCGTGCACGGATCCAAGCATAtcgaaccc	ata-miR160b-3p	GCGTGCACGGATCCAAGCATA	3'	Diff	gp2b	(((.(((.((((..((((.((((((..((((.(((((((.((..((....((((..(((.(((.(((.((..((((((.((((...(((.(((.......)))....)))..)))).))))))..)).))).))).)))..))))......))..)).)))))))...))))..)))))).))))..)))))))..)))...	199	42.6	-74.1	0.9	0	0	0	0	6	5	0	0	0	25	67	29	0	0	0	0	4.23367	6.67787	0	0	0	13.6744	22.9491	33.1067	middle
31	27	aof-miR160b_L-2R+2	CCTGGTTCCCTGTATGCCACA	21	chr6	+	217025839	217025922	tgCCTGGCTCCCTGTATGCCACAcatatagacctaatctacactctttaggttggctattatgggtggcgtgcgaggagccaag	105	aof-MIR160c,aof-MIR160b,osa-MIR160a,osa-MIR160d,osa-MIR160c,osa-MIR160e,osa-MIR160b,bdi-MIR160c,bdi-MIR160b,bdi-MIR160a,bdi-MIR160d,bdi-MIR160f,sbi-MIR160b,sbi-MIR160a,sbi-MIR160e,sbi-MIR160d,sbi-MIR160c,zma-MIR160b,zma-MIR160a,zma-MIR160g,zma-MIR160e,zma-MIR160d,zma-MIR160c,zma-MIR160f,tae-MIR160,ata-MIR160a,ata-MIR160b,ata-MIR160c,far-MIR160,ttu-MIR160,mtr-MIR160a,mtr-MIR160d,mtr-MIR160b,mtr-MI…	aof-MIR160b	gggatcgatgTGCCTGGTTCCCTGTATGCCAcccaggtacccccaatctcatgctgcctaggttgggtattttgggtggcgtgcatggaatcaagcatgtcttaattaatttgcctttgatctcc	aof-miR160b	TGCCTGGTTCCCTGTATGCCA	5'	Diff	gp2b	....(((((((..(((((((((.(((((((.((.((((((.......))))))))))).)))).)))))))))..)))))))..	78	51.2	-41.9	1	0	0	0	0	5.5	4	8	0	0	5.5	13.5	0	0	0	0	0	3.88087	5.3423	5.47964	0	0	3.00836	4.62408	0	low
32	28	aof-miR160b_1ss12CT	TGCCTGGTTCCTTGTATGCCA	21	chr6	-	727740	727819	agTGCCTGGTTCCCTGTATGCCAcacatatagatcaatcacattaggatattggatattgtgggtggcgtgcttggatat	32	aof-MIR160b,aof-MIR160c,osa-MIR160a,bdi-MIR160c,bdi-MIR160b,sbi-MIR160a,sbi-MIR160b,zma-MIR160b,zma-MIR160g,zma-MIR160a,far-MIR160,ptc-MIR160a,ptc-MIR160d,ath-MIR160b,mdm-MIR160b,mdm-MIR160d,mdm-MIR160a,stu-MIR160b,aly-MIR160b,ppe-MIR160a,mes-MIR160a,vvi-MIR160c,nta-MIR160c,lus-MIR160h,bna-MIR160d,bna-MIR160c,bna-MIR160b,cas-MIR160b,cpa-MIR160b,cpa-MIR160e,rco-MIR160b,dpr-MIR160,	aof-MIR160b	gggatcgatgTGCCTGGTTCCCTGTATGCCAcccaggtacccccaatctcatgctgcctaggttgggtattttgggtggcgtgcatggaatcaagcatgtcttaattaatttgcctttgatctcc	aof-miR160b	TGCCTGGTTCCCTGTATGCCA	5'	Diff	gp2b	..........(((..(((((((((.((((...(((.(((.......)))....)))..)))).)))))))))..)))...	67	43.8	-23.5	0.7	40	0	13	5	36.5	18	19	29	0	25.5	74.5	0	15.0515	0	12.4529	22.6129	25.7548	24.0403	13.0141	17.6915	0	13.9479	25.518	0	middle
33	29	aof-miR164_2ss1TG20CA	GGGAGAAGCAGGGCACGTGAA	21	chr1	-	464524371	464524435	caaggTGGAGAAGCAGGGCACGTGAAttactatctaagatcgctagctcttttatctccgctggt	99	aof-MIR164,osa-MIR164e,osa-MIR164b,osa-MIR164a,osa-MIR164d,osa-MIR164f,bdi-MIR164e,bdi-MIR164b,bdi-MIR164c,bdi-MIR164a,sbi-MIR164d,sbi-MIR164b,sbi-MIR164a,sbi-MIR164e,zma-MIR164b,zma-MIR164d,zma-MIR164c,zma-MIR164f,zma-MIR164a,zma-MIR164g,zma-MIR164h,tae-MIR164,ata-MIR164b,ata-MIR164c,ata-MIR164a,mtr-MIR164b,mtr-MIR164c,mtr-MIR164a,gma-MIR164j,gma-MIR164k,gma-MIR164a,gma-MIR164f,gma-MIR164g,gma-M…	aof-MIR164	gcattgagaggtggcttgtggaggaTGGAGAAGCAGGGCACGTGCAttaccatctaacgcacgtgagtacttagttggatagttcttcatgtgctcatcttctccatcatgcacatcctacctaaagtttcaa	aof-miR164	TGGAGAAGCAGGGCACGTGCA	5'	Diff	gp2b	...((((((((...(((((..((((.(((.....)))..))))..)))))....))))))))...	59	47.7	-20.1	0.6	10	0	5	0	0	0	30	0	0	0	0	0	3.76287	0	4.78958	0	0	0	20.5486	0	0	0	0	0	middle
34	30	bdi-miR164a-3p_L+1R-1_1ss11TA	TCATGTGCCCATCTTCTCCAC	21	chr10	+	29980763	29980904	aaaggagggagaggaaatatatttagtcgtagagaaaccctgaagattagttctatctaatatcttactgcatctcttcaaagaattaaagaaaactcttttaggttagcttgttatTCATGTGCCCATCTTCTCCACcatg	5	osa-MIR164f,osa-MIR164b,bdi-MIR164a,sbi-MIR164a,zma-MIR164b,	bdi-MIR164a	gagtggacatatgaggcgaggcgcgcgaggTGGAGAAGCAGGGCACGTGCAttcgttccagctcgccgccggtgtgccgcgccgcggcctgggcgcgcgtgtcgcccgagcggccggccatgcgcgtgtgtgtgcatgCATGTGCCCTTCTTCTCCACCgcgcaagcctcgcctgcgaacgcgcgcgcacgcc	bdi-miR164a-3p	CATGTGCCCTTCTTCTCCACC	3'	Diff	gp2b	...((..((((((((...............(((((.......((((((((......)))..)))))......))))).....((((..(((..((((......))))..)))...)))).........)))))))).))...	136	35.2	-29	0.6	474	126	113	0	0	0	356	386	20	0	40	0	178.36	298.114	108.244	0	0	0	243.844	235.481	97.3729	0	13.701	0	middle
35	31	osa-miR166d-5p	GGAATGTTGTCTGGCTCGAGG	21	chr1	-	275513160	275513288	acaggaagcgttgtttttgtggGGAATGTTGTCTGGCTCGAGGcctcgttattgtcttagtttctacccttttccaattttaatcagaTCTCGGACCAGGCTTCATTCCccaaaatcattgcttccatc	176	aof-MIR166c,aof-MIR166d,aof-MIR166a,aof-MIR166b,osa-MIR166a,osa-MIR166j,osa-MIR166f,osa-MIR166g,osa-MIR166d,osa-MIR166h,osa-MIR166m,osa-MIR166b,bdi-MIR166c,bdi-MIR166i,bdi-MIR166a,bdi-MIR166e,bdi-MIR166f,bdi-MIR166b,sbi-MIR166a,sbi-MIR166i,sbi-MIR166d,sbi-MIR166k,sbi-MIR166f,sbi-MIR166j,sbi-MIR166h,zma-MIR166d,zma-MIR166i,zma-MIR166b,zma-MIR166c,zma-MIR166m,zma-MIR166e,zma-MIR166l,zma-MIR166a,ata…	osa-MIR166d	gaagctttttcactttgaggGGAATGTTGTCTGGCTCGAGGtgcatggagaaacctctgatcgatcaggtttgatctgtagagactgatcTCGGACCAGGCTTCATTCCCCtcaagtaaagctcc	osa-miR166d-5p	GGAATGTTGTCTGGCTCGAGG	5'	Yes	gp2b	...((((((..((......(((((((((..((((((..((((..((..((((((....((........))....)))...)))..))..))))..))))))..)))))))))....))..))))))...	123	44.2	-48.3	0.8	4710	137	1474.5	13	78	28.5	2193.5	3421	82	614.5	1474.5	970.5	1772.31	324.14	1412.45	58.7936	55.0377	38.0639	1502.45	2086.99	399.229	336.116	505.052	1107.93	high
35	32	aof-miR166c_L+2R-2	TCTCGGACCAGGCTTCATCCC	21	chr1	-	275513160	275513288	acaggaagcgttgtttttgtggGGAATGTTGTCTGGCTCGAGGcctcgttattgtcttagtttctacccttttccaattttaatcagaTCTCGGACCAGGCTTCATTCCccaaaatcattgcttccatc	176	aof-MIR166c,aof-MIR166d,aof-MIR166a,aof-MIR166b,osa-MIR166a,osa-MIR166j,osa-MIR166f,osa-MIR166g,osa-MIR166d,osa-MIR166h,osa-MIR166m,osa-MIR166b,bdi-MIR166c,bdi-MIR166i,bdi-MIR166a,bdi-MIR166e,bdi-MIR166f,bdi-MIR166b,sbi-MIR166a,sbi-MIR166i,sbi-MIR166d,sbi-MIR166k,sbi-MIR166f,sbi-MIR166j,sbi-MIR166h,zma-MIR166d,zma-MIR166i,zma-MIR166b,zma-MIR166c,zma-MIR166m,zma-MIR166e,zma-MIR166l,zma-MIR166a,ata…	aof-MIR166c	ttcatttgttgaggttaggttaaggggaatgttgtctggctcgaggtaatttttcgttttaatactaaaataatcTCGGACCAGGCTTCATCCCCCtcaacgcaccaacactacttgctct	aof-miR166c	TCGGACCAGGCTTCATCCCCC	3'	Diff	gp2b	...((((((..((......(((((((((..((((((..((((..((..((((((....((........))....)))...)))..))..))))..))))))..)))))))))....))..))))))...	123	44.2	-48.3	0.8	127	0	8	0	24	10	52	118	0	52	33	20.5	47.7884	0	7.66333	0	16.9347	13.3557	35.6176	71.9863	0	28.4427	11.3033	23.403	middle
36	33	aof-miR166c_3ss17CT20CT21CT	TCGGACCAGGCTTCATTCCTT	21	chr3	+	181055859	181055988	aTCGGACCAGGCTTCATTCCTTtcaaaatcatgtcttctcttctcttggaatatcgatctgtttctcttgtgtcgtaagagaatttgttaagatatggttAAGGGGAATGTTGTCTGGCTCgtggtcatc	235	aof-MIR166c,aof-MIR166a,aof-MIR166b,aof-MIR166d,osa-MIR166h,osa-MIR166g,osa-MIR166d,osa-MIR166c,osa-MIR166j,osa-MIR166b,osa-MIR166a,osa-MIR166f,osa-MIR166m,osa-MIR166l,bdi-MIR166j,bdi-MIR166b,bdi-MIR166e,bdi-MIR166f,bdi-MIR166a,bdi-MIR166i,bdi-MIR166c,bdi-MIR166d,bdi-MIR166h,bdi-MIR166g,sbi-MIR166f,sbi-MIR166k,sbi-MIR166d,sbi-MIR166c,sbi-MIR166b,sbi-MIR166h,sbi-MIR166i,sbi-MIR166j,sbi-MIR166a,zma…	aof-MIR166c	ttcatttgttgaggttaggttaaggggaatgttgtctggctcgaggtaatttttcgttttaatactaaaataatcTCGGACCAGGCTTCATCCCCCtcaacgcaccaacactacttgctct	aof-miR166c	TCGGACCAGGCTTCATCCCCC	5'	Diff	gp2b	..((..((((((..((((((..(...(((((((((((...((((((((..((((.((........))..))))..))))))))......))))))))))).)..))))))..))))))..))........	120	40.8	-40.9	0.8	2539	68.5	561	26	340.5	152.5	1497.5	3088	18.5	316.5	164	257	955.391	162.07	537.391	117.587	240.261	203.675	1025.72	1883.84	90.0699	173.118	56.174	293.394	high
36	34	aof-MIR166c-p3	AAGGGGAATGTTGTCTGGCTC	21	chr3	+	181055859	181055988	aTCGGACCAGGCTTCATTCCTTtcaaaatcatgtcttctcttctcttggaatatcgatctgtttctcttgtgtcgtaagagaatttgttaagatatggttAAGGGGAATGTTGTCTGGCTCgtggtcatc	235	aof-MIR166c,aof-MIR166a,aof-MIR166b,aof-MIR166d,osa-MIR166h,osa-MIR166g,osa-MIR166d,osa-MIR166c,osa-MIR166j,osa-MIR166b,osa-MIR166a,osa-MIR166f,osa-MIR166m,osa-MIR166l,bdi-MIR166j,bdi-MIR166b,bdi-MIR166e,bdi-MIR166f,bdi-MIR166a,bdi-MIR166i,bdi-MIR166c,bdi-MIR166d,bdi-MIR166h,bdi-MIR166g,sbi-MIR166f,sbi-MIR166k,sbi-MIR166d,sbi-MIR166c,sbi-MIR166b,sbi-MIR166h,sbi-MIR166i,sbi-MIR166j,sbi-MIR166a,zma…	aof-MIR166c	ttcatttgttgaggttaggttaaggggaatgttgtctggctcgaggtaatttttcgttttaatactaaaataatcTCGGACCAGGCTTCATCCCCCtcaacgcaccaacactacttgctct	aof-MIR166c-p3	aaggggaatgttgtctggctc	3'	New	gp2b	..((..((((((..((((((..(...(((((((((((...((((((((..((((.((........))..))))..))))))))......))))))))))).)..))))))..))))))..))........	120	40.8	-40.9	0.8	621.5	6.5	35.5	0	12.5	3.5	486.5	1208	0	39	27.5	12.5	233.862	15.3789	34.006	0	8.82015	4.67451	333.23	736.944	0	21.332	9.41941	14.2701	high
37	35	aof-MIR166c-p5	AAGGGGAATGTTGTCTGGCTC	21	chr7	-	251392551	251392688	tatgagttgttaaggttaggttAAGGGGAATGTTGTTTGGCTCgaggtcatgtaggttgattcgttctctcggttaattaataatctttatgtgatcTCGGACCAGGCTTCATTCCTCtcaaccaacatttgctctag	222	aof-MIR166c,aof-MIR166b,aof-MIR166d,aof-MIR166a,osa-MIR166a,osa-MIR166j,osa-MIR166b,osa-MIR166g,osa-MIR166d,osa-MIR166f,osa-MIR166m,osa-MIR166c,osa-MIR166h,bdi-MIR166j,bdi-MIR166e,bdi-MIR166d,bdi-MIR166f,bdi-MIR166i,bdi-MIR166b,bdi-MIR166c,bdi-MIR166a,sbi-MIR166d,sbi-MIR166k,sbi-MIR166a,sbi-MIR166j,sbi-MIR166b,sbi-MIR166c,sbi-MIR166i,sbi-MIR166f,sbi-MIR166h,zma-MIR166c,zma-MIR166f,zma-MIR166e,zma…	aof-MIR166c	ttcatttgttgaggttaggttaaggggaatgttgtctggctcgaggtaatttttcgttttaatactaaaataatcTCGGACCAGGCTTCATCCCCCtcaacgcaccaacactacttgctct	aof-MIR166c-p5	aaggggaatgttgtctggctc	5'	New	gp2b	...((((.......(((.((((.(((((((((..(..(((..((((((((..((((((((((((......)))...)))))).....)))..))))))))..)))..)..))))))))).)))))))....))))...	132	40.6	-50.4	0.9	621.5	6.5	35.5	0	12.5	3.5	486.5	1208	0	39	27.5	12.5	233.862	15.3789	34.006	0	8.82015	4.67451	333.23	736.944	0	21.332	9.41941	14.2701	high
37	33	aof-miR166c_3ss17CT20CT21CT	TCGGACCAGGCTTCATTCCTT	21	chr7	-	251392551	251392688	tatgagttgttaaggttaggttAAGGGGAATGTTGTTTGGCTCgaggtcatgtaggttgattcgttctctcggttaattaataatctttatgtgatcTCGGACCAGGCTTCATTCCTCtcaaccaacatttgctctag	222	aof-MIR166c,aof-MIR166b,aof-MIR166d,aof-MIR166a,osa-MIR166a,osa-MIR166j,osa-MIR166b,osa-MIR166g,osa-MIR166d,osa-MIR166f,osa-MIR166m,osa-MIR166c,osa-MIR166h,bdi-MIR166j,bdi-MIR166e,bdi-MIR166d,bdi-MIR166f,bdi-MIR166i,bdi-MIR166b,bdi-MIR166c,bdi-MIR166a,sbi-MIR166d,sbi-MIR166k,sbi-MIR166a,sbi-MIR166j,sbi-MIR166b,sbi-MIR166c,sbi-MIR166i,sbi-MIR166f,sbi-MIR166h,zma-MIR166c,zma-MIR166f,zma-MIR166e,zma…	aof-MIR166c	ttcatttgttgaggttaggttaaggggaatgttgtctggctcgaggtaatttttcgttttaatactaaaataatcTCGGACCAGGCTTCATCCCCCtcaacgcaccaacactacttgctct	aof-miR166c	TCGGACCAGGCTTCATCCCCC	3'	Diff	gp2b	...((((.......(((.((((.(((((((((..(..(((..((((((((..((((((((((((......)))...)))))).....)))..))))))))..)))..)..))))))))).)))))))....))))...	132	40.6	-50.4	0.9	2539	68.5	561	26	340.5	152.5	1497.5	3088	18.5	316.5	164	257	955.391	162.07	537.391	117.587	240.261	203.675	1025.72	1883.84	90.0699	173.118	56.174	293.394	high
38	36	mtr-MIR166f-p5_1ss6GT	AATGATGTTTGTTCCAAGATC	21	chr5	+	14824759	14824846	tatggAATGATGTTTGTTCCAAGATCtttaattaatcctgatcataattggatcttgatttagatCTCGGACCAGGCTTCATTCCtca	117	aof-MIR166b,aof-MIR166d,aof-MIR166a,aof-MIR166c,osa-MIR166a,osa-MIR166b,osa-MIR166d,osa-MIR166g,osa-MIR166f,osa-MIR166m,osa-MIR166h,bdi-MIR166e,bdi-MIR166f,bdi-MIR166c,bdi-MIR166b,bdi-MIR166i,sbi-MIR166d,sbi-MIR166k,sbi-MIR166a,sbi-MIR166j,sbi-MIR166f,sbi-MIR166i,sbi-MIR166h,zma-MIR166c,zma-MIR166m,zma-MIR166d,zma-MIR166a,zma-MIR166e,zma-MIR166i,zma-MIR166b,zma-MIR166l,ata-MIR166d,ata-MIR166a,vca…	mtr-MIR166f	tgtttggaatgaggtttgttccaagatcatcacacatcatgtttcttcttccctttcaataattcttgattaatttatgttcatacatctatatatatatctatatatattatcaagtcattacatgcatgggatgagatattgagagtgatcTCGGACCAGGCTTCATTCCTCacacc	mtr-MIR166f-p5	aatgaggtttgttccaagatc	5'	New	gp2b	...(((((((.(..((.(((.((((((..(((((((((...........))))..))))).)))))).))).))..).)))))))...	82	35.2	-30.5	1	0	0	0	0	0	0	0	0	0	10	44	19	0	0	0	0	0	0	0	0	0	5.46975	15.0711	21.6906	middle
38	37	aof-miR166a_L-1	CTCGGACCAGGCTTCATTCC	20	chr5	+	14824759	14824846	tatggAATGATGTTTGTTCCAAGATCtttaattaatcctgatcataattggatcttgatttagatCTCGGACCAGGCTTCATTCCtca	117	aof-MIR166b,aof-MIR166d,aof-MIR166a,aof-MIR166c,osa-MIR166a,osa-MIR166b,osa-MIR166d,osa-MIR166g,osa-MIR166f,osa-MIR166m,osa-MIR166h,bdi-MIR166e,bdi-MIR166f,bdi-MIR166c,bdi-MIR166b,bdi-MIR166i,sbi-MIR166d,sbi-MIR166k,sbi-MIR166a,sbi-MIR166j,sbi-MIR166f,sbi-MIR166i,sbi-MIR166h,zma-MIR166c,zma-MIR166m,zma-MIR166d,zma-MIR166a,zma-MIR166e,zma-MIR166i,zma-MIR166b,zma-MIR166l,ata-MIR166d,ata-MIR166a,vca…	aof-MIR166a	gagaaaggaaagtttgggtgtttggaatgaagtttgatccaagatcttttaatattaatgatcctaatgagtggctaattaagagaTCTCGGACCAGGCTTCATTCCtcacaccttgctttttcattacaga	aof-miR166a	TCTCGGACCAGGCTTCATTCC	3'	Diff	gp2b	...(((((((.(..((.(((.((((((..(((((((((...........))))..))))).)))))).))).))..).)))))))...	82	35.2	-30.5	1	30	0	15.5	15	18.5	18.5	10.5	21.5	0	36	65.5	32	11.2886	0	14.8477	67.8388	13.0538	24.7081	7.19202	13.1161	0	19.6911	22.4353	36.5315	middle
39	38	aof-MIR166b-p5_1ss18TC	AGTTTGATCCAAGATCTCTTC	21	chr6	+	203060127	203060275	ggtgtttggaatggAGTTTGATCCAAGATCTCTTCtagatttgattttagtagcttttctctcatgaaaaggaaactgtgagagtttctcataatagttttgattcactatgaagagaTCTCGGACCAGGCTTCATTCctcacaccata	89	aof-MIR166a,aof-MIR166d,aof-MIR166b,osa-MIR166d,osa-MIR166g,osa-MIR166f,osa-MIR166a,osa-MIR166b,bdi-MIR166i,bdi-MIR166b,bdi-MIR166c,bdi-MIR166f,bdi-MIR166e,sbi-MIR166i,sbi-MIR166h,sbi-MIR166a,sbi-MIR166d,sbi-MIR166k,zma-MIR166i,zma-MIR166b,zma-MIR166l,zma-MIR166c,zma-MIR166a,zma-MIR166e,zma-MIR166d,ata-MIR166d,ata-MIR166a,vca-MIR166c,vca-MIR166b,ssp-MIR166,mtr-MIR166f,mtr-MIR166b,mtr-MIR166g,mtr-…	aof-MIR166b	tgaagaaggaaagttgggtgtttggaatgaagtttgatccaagatcttttcgccattgatcttgttttcagtcccatatatattttaaaaaaaagataccggggtaagttttattccaatattttagggccagaTCTCGGACCAGGCTTCATTCTtcacaccttactttttattgcaaat	aof-MIR166b-p5	agtttgatccaagatcttttc	5'	New	gp2b	(((((..(((((((((..((.(((.(((((((((((((...(((.........((((((......))))))(((((((((((.....)))))...))))))...)))))).)))))))))).))).))..)))))))))..)))))...	146	37.6	-61.1	1.1	0	0	0	0	0	0	0	0	0	0	0	5	0	0	0	0	0	0	0	0	0	0	0	5.70805	low
39	39	aof-miR166b_R-1	TCTCGGACCAGGCTTCATTC	20	chr6	+	203060127	203060275	ggtgtttggaatggAGTTTGATCCAAGATCTCTTCtagatttgattttagtagcttttctctcatgaaaaggaaactgtgagagtttctcataatagttttgattcactatgaagagaTCTCGGACCAGGCTTCATTCctcacaccata	89	aof-MIR166a,aof-MIR166d,aof-MIR166b,osa-MIR166d,osa-MIR166g,osa-MIR166f,osa-MIR166a,osa-MIR166b,bdi-MIR166i,bdi-MIR166b,bdi-MIR166c,bdi-MIR166f,bdi-MIR166e,sbi-MIR166i,sbi-MIR166h,sbi-MIR166a,sbi-MIR166d,sbi-MIR166k,zma-MIR166i,zma-MIR166b,zma-MIR166l,zma-MIR166c,zma-MIR166a,zma-MIR166e,zma-MIR166d,ata-MIR166d,ata-MIR166a,vca-MIR166c,vca-MIR166b,ssp-MIR166,mtr-MIR166f,mtr-MIR166b,mtr-MIR166g,mtr-…	aof-MIR166b	tgaagaaggaaagttgggtgtttggaatgaagtttgatccaagatcttttcgccattgatcttgttttcagtcccatatatattttaaaaaaaagataccggggtaagttttattccaatattttagggccagaTCTCGGACCAGGCTTCATTCTtcacaccttactttttattgcaaat	aof-miR166b	TCTCGGACCAGGCTTCATTCT	3'	Diff	gp2b	(((((..(((((((((..((.(((.(((((((((((((...(((.........((((((......))))))(((((((((((.....)))))...))))))...)))))).)))))))))).))).))..)))))))))..)))))...	146	37.6	-61.1	1.1	6	0	0	0	5.5	2.5	3	2.5	0	8	17	13	2.25772	0	0	0	3.88087	3.33893	2.05486	1.52513	0	4.3758	5.82291	14.8409	middle
40	40	osa-miR166d-5p_R+1_1ss19AT	GGAATGTTGTCTGGCTCGTGGT	22	chr7	-	50745856	50745963	ttaggttaaggGGACTGTTGTCTGGCTCGTGGTcatcgaatcgtgaaagttgattttctctaatctctttcggtgatCTCGGACCAGGCTTCATTCCCctaaaccaac	235	aof-MIR166d,aof-MIR166c,aof-MIR166b,aof-MIR166a,osa-MIR166d,osa-MIR166f,osa-MIR166m,osa-MIR166a,osa-MIR166b,osa-MIR166l,osa-MIR166g,osa-MIR166j,osa-MIR166c,osa-MIR166h,bdi-MIR166e,bdi-MIR166b,bdi-MIR166c,bdi-MIR166i,bdi-MIR166g,bdi-MIR166h,bdi-MIR166j,bdi-MIR166f,bdi-MIR166d,bdi-MIR166a,sbi-MIR166a,sbi-MIR166j,sbi-MIR166d,sbi-MIR166i,sbi-MIR166h,sbi-MIR166k,sbi-MIR166f,sbi-MIR166b,sbi-MIR166c,zma…	osa-MIR166d	gaagctttttcactttgaggGGAATGTTGTCTGGCTCGAGGtgcatggagaaacctctgatcgatcaggtttgatctgtagagactgatcTCGGACCAGGCTTCATTCCCCtcaagtaaagctcc	osa-miR166d-5p	GGAATGTTGTCTGGCTCGAGG	5'	Diff	gp2b	...((((.((((((.((..((((((..((.((((((((((.......((..((((......)))).)))))))))))).))..))))))..)).)))))).))))...	102	46.3	-47.4	0.9	254	0	13.5	0	0	0	172.5	440.5	0	25.5	12	2.5	95.5768	0	12.9319	0	0	0	118.155	268.728	0	13.9479	4.11029	2.85402	middle
40	41	aof-miR166a_L-1R+1	CTCGGACCAGGCTTCATTCCC	21	chr7	-	50745856	50745963	ttaggttaaggGGACTGTTGTCTGGCTCGTGGTcatcgaatcgtgaaagttgattttctctaatctctttcggtgatCTCGGACCAGGCTTCATTCCCctaaaccaac	235	aof-MIR166d,aof-MIR166c,aof-MIR166b,aof-MIR166a,osa-MIR166d,osa-MIR166f,osa-MIR166m,osa-MIR166a,osa-MIR166b,osa-MIR166l,osa-MIR166g,osa-MIR166j,osa-MIR166c,osa-MIR166h,bdi-MIR166e,bdi-MIR166b,bdi-MIR166c,bdi-MIR166i,bdi-MIR166g,bdi-MIR166h,bdi-MIR166j,bdi-MIR166f,bdi-MIR166d,bdi-MIR166a,sbi-MIR166a,sbi-MIR166j,sbi-MIR166d,sbi-MIR166i,sbi-MIR166h,sbi-MIR166k,sbi-MIR166f,sbi-MIR166b,sbi-MIR166c,zma…	aof-MIR166a	gagaaaggaaagtttgggtgtttggaatgaagtttgatccaagatcttttaatattaatgatcctaatgagtggctaattaagagaTCTCGGACCAGGCTTCATTCCtcacaccttgctttttcattacaga	aof-miR166a	TCTCGGACCAGGCTTCATTCC	3'	Diff	gp2b	...((((.((((((.((..((((((..((.((((((((((.......((..((((......)))).)))))))))))).))..))))))..)).)))))).))))...	102	46.3	-47.4	0.9	380.5	8	74	0	28.5	20	164	387.5	2.5	157.5	110.5	35.5	143.177	18.9279	70.8858	0	20.1099	26.7115	112.333	236.396	12.1716	86.1486	37.8489	40.5272	middle
41	42	osa-miR166b-5p_R+1_2ss11CT19GA	GGAATGTTGTTTGGCTCGAGGT	22	chr9	+	147296057	147296166	ttaggttaaggGGAATGTTGTTTGGCTCAAGGTcatgtaggttgattcgttctctctcgattgataatccttatgtgaTCTCGGACCAGGCTTCATTCCtctcaaccaac	222	aof-MIR166a,aof-MIR166d,aof-MIR166b,aof-MIR166c,osa-MIR166b,osa-MIR166a,osa-MIR166f,osa-MIR166d,osa-MIR166g,osa-MIR166m,osa-MIR166h,osa-MIR166c,osa-MIR166j,bdi-MIR166c,bdi-MIR166b,bdi-MIR166i,bdi-MIR166e,bdi-MIR166f,bdi-MIR166a,bdi-MIR166j,bdi-MIR166d,sbi-MIR166h,sbi-MIR166i,sbi-MIR166k,sbi-MIR166d,sbi-MIR166a,sbi-MIR166j,sbi-MIR166b,sbi-MIR166c,sbi-MIR166f,zma-MIR166l,zma-MIR166b,zma-MIR166i,zma…	osa-MIR166b	gggagccttttcattttgaggGGAATGTTGTCTGGCTCGGGGctacttttaatttctctctcttttgatatcttcttttctcgatctcctagcttgatcttttgatctctcaaatcgatcttaagaaaaagatcagtcaaagagatgagagtagatgtctgtagatcTCGGACCAGGCTTCATTCCCCccaaacagaagggctccc	osa-miR166b-5p	GGAATGTTGTCTGGCTCGGGG	5'	Diff	gp2b	...((((.(((((((((..(..(((..(.((((((..((((.....((..((......))..)).....))))..)))))).)..)))..)..))))))))).))))...	104	43.6	-41.9	0.9	2.5	0	0	0	0	0	0	0	0	20	18	11.5	0.940716	0	0	0	0	0	0	0	0	10.9395	6.16543	13.1285	middle
41	43	aof-miR166a	TCTCGGACCAGGCTTCATTCC	21	chr9	+	147296057	147296166	ttaggttaaggGGAATGTTGTTTGGCTCAAGGTcatgtaggttgattcgttctctctcgattgataatccttatgtgaTCTCGGACCAGGCTTCATTCCtctcaaccaac	222	aof-MIR166a,aof-MIR166d,aof-MIR166b,aof-MIR166c,osa-MIR166b,osa-MIR166a,osa-MIR166f,osa-MIR166d,osa-MIR166g,osa-MIR166m,osa-MIR166h,osa-MIR166c,osa-MIR166j,bdi-MIR166c,bdi-MIR166b,bdi-MIR166i,bdi-MIR166e,bdi-MIR166f,bdi-MIR166a,bdi-MIR166j,bdi-MIR166d,sbi-MIR166h,sbi-MIR166i,sbi-MIR166k,sbi-MIR166d,sbi-MIR166a,sbi-MIR166j,sbi-MIR166b,sbi-MIR166c,sbi-MIR166f,zma-MIR166l,zma-MIR166b,zma-MIR166i,zma…	aof-MIR166d	attaaaggaagctttctctttgaggggaatgttgtctggctcgaggccatcttttctgatccattaccctgatcatttctcttttcttttctattcatttatatcagattttaaaagatcaacaacccgtttctcaatttatattgtaaattaagactccatgagagagatcgaTCTCGGACCAGGCTTCATTCCcctcaatcacagcttccaaccccatct	aof-miR166a	TCTCGGACCAGGCTTCATTCC	3'	Yes	gp2b	...((((.(((((((((..(..(((..(.((((((..((((.....((..((......))..)).....))))..)))))).)..)))..)..))))))))).))))...	104	43.6	-41.9	0.9	2218	171.5	788	367	1504	605.5	1109	1386	95	7003	6992.5	3140	834.603	405.767	754.838	1659.79	1061.24	808.69	759.615	845.534	462.521	3830.47	2395.1	3584.66	high
42	43	aof-miR166a	TCTCGGACCAGGCTTCATTCC	21	chr9	+	180260775	180260827	gtcgaTCTCGGACCAGGCTTCATTCCcctcaatcacagcttccgtaaatcctt	128	aof-MIR166a,aof-MIR166d,aof-MIR166b,osa-MIR166b,osa-MIR166a,osa-MIR166m,osa-MIR166f,osa-MIR166g,osa-MIR166d,bdi-MIR166i,bdi-MIR166b,bdi-MIR166c,bdi-MIR166e,bdi-MIR166f,sbi-MIR166h,sbi-MIR166i,sbi-MIR166k,sbi-MIR166d,sbi-MIR166j,sbi-MIR166a,zma-MIR166l,zma-MIR166b,zma-MIR166i,zma-MIR166e,zma-MIR166a,zma-MIR166d,zma-MIR166c,ata-MIR166a,ata-MIR166d,vca-MIR166c,vca-MIR166b,ssp-MIR166,mtr-MIR166c,mtr-…	aof-MIR166d	attaaaggaagctttctctttgaggggaatgttgtctggctcgaggccatcttttctgatccattaccctgatcatttctcttttcttttctattcatttatatcagattttaaaagatcaacaacccgtttctcaatttatattgtaaattaagactccatgagagagatcgaTCTCGGACCAGGCTTCATTCCcctcaatcacagcttccaaccccatct	aof-miR166a	TCTCGGACCAGGCTTCATTCC	5'	Yes	gp2b	...(((..((((...((((.................))))))))...)))...	47	50.9	-6.8	0.3	2218	171.5	788	367	1504	605.5	1109	1386	95	7003	6992.5	3140	834.603	405.767	754.838	1659.79	1061.24	808.69	759.615	845.534	462.521	3830.47	2395.1	3584.66	high
43	44	aof-miR166a_L-2R+1	TCGGACCAGGCTTCATTCCT	20	chr11	+	78228859	78228925	agtagcagtggtcaacctattgatatcaatatgaagatattgatcTCGGACCAGGCTTCATTCCTca	102	aof-MIR166a,aof-MIR166d,aof-MIR166b,osa-MIR166g,osa-MIR166h,osa-MIR166d,osa-MIR166f,osa-MIR166a,osa-MIR166b,bdi-MIR166f,bdi-MIR166j,bdi-MIR166e,bdi-MIR166b,bdi-MIR166c,bdi-MIR166i,sbi-MIR166k,sbi-MIR166f,sbi-MIR166a,sbi-MIR166d,sbi-MIR166i,sbi-MIR166h,zma-MIR166m,zma-MIR166l,zma-MIR166c,zma-MIR166d,zma-MIR166a,zma-MIR166e,zma-MIR166i,zma-MIR166b,ata-MIR166c,ata-MIR166d,ata-MIR166a,vca-MIR166b,vca…	aof-MIR166d	attaaaggaagctttctctttgaggggaatgttgtctggctcgaggccatcttttctgatccattaccctgatcatttctcttttcttttctattcatttatatcagattttaaaagatcaacaacccgtttctcaatttatattgtaaattaagactccatgagagagatcgaTCTCGGACCAGGCTTCATTCCcctcaatcacagcttccaaccccatct	aof-miR166a	TCTCGGACCAGGCTTCATTCC	3'	Diff	gp2b	...(((..(((((.....((..(((((........)))))..))....))))).)))..........	54	40.3	-17.2	0.6	56	0	10	16	32.5	20	41	50	0	41	39.5	150.5	21.072	0	9.57916	72.3614	22.9324	26.7115	28.0831	30.5027	0	22.426	13.5297	171.812	middle
44	45	aof-MIR166b-p5_2ss6GC17TG	AAGAACGAAAGTTGGGGG	18	chr3	+	321399507	321399581	ttaatcAAGAACGAAAGTTGGGGGctcgaagacgatcagataccgtcttcgatgtgaagacttgttcttggtgca	1	aof-MIR166b,	aof-MIR166b	tgaagaaggaaagttgggtgtttggaatgaagtttgatccaagatcttttcgccattgatcttgttttcagtcccatatatattttaaaaaaaagataccggggtaagttttattccaatattttagggccagaTCTCGGACCAGGCTTCATTCTtcacaccttactttttattgcaaat	aof-MIR166b-p5	aagaaggaaagttgggtg	5'	New	gp2b	...((((((((((..((((....(((((((((((.........))))))))).))...))))))))))))))...	69	45.3	-27.4	0.8	5	0	0	0	0	0	0	4	0	7.5	21	0	1.88143	0	0	0	0	0	0	2.44021	0	4.10231	7.19301	0	low
45	46	osa-miR166h-5p_2ss5TC8TC	GGAACGTCGGCTGGCTCGAGG	21	chr7	-	50746238	50746364	GGAATGTCGGCTGGCTCGAGGcatggtctagttgccactttcttcctctctctctctctctctctctcttttaagagagtgaggaagagttagggtgataaatcgaagcatcggaccaggcttcatc	10	osa-MIR166h,sbi-MIR166f,zma-MIR166m,ata-MIR166c,mtr-MIR166e,gma-MIR166e,vvi-MIR166f,vvi-MIR166b,cme-MIR166h,cpa-MIR166e,	osa-MIR166h	ggtggcttgtggGGAATGTTGGCTGGCTCGAGGtatccacatcttaattcctctccggcgatcgagccggctcgggcgtgtggaagcgTCGGACCAGGCTTCATTCCTCgcaagccgat	osa-miR166h-5p	GGAATGTTGGCTGGCTCGAGG	5'	Diff	gp2b	.....(((....)))..(((((.((((((...(((....((..((((((..((((..(((.((((((......)))))).)))..))))..)))).))..)).....)))..)))))).)))))...	107	49.6	-46.4	0.7	465	11	66	0	14	0	223	325	0	24	13	17	174.973	26.0259	63.2224	0	9.87857	0	152.745	198.267	0	13.1274	4.45281	19.4074	middle
46	47	aof-MIR166b-p3_2ss6GC17TG	AAGAACGAAAGTTGGGGG	18	unanchor17	+	8243	8260	AAGAACGAAAGTTGGGGG	1	aof-MIR166b,	aof-MIR166b	tgaagaaggaaagttgggtgtttggaatgaagtttgatccaagatcttttcgccattgatcttgttttcagtcccatatatattttaaaaaaaagataccggggtaagttttattccaatattttagggccagaTCTCGGACCAGGCTTCATTCTtcacaccttactttttattgcaaat	aof-MIR166b-p3	aagaaggaaagttgggtg	3'	New	gp2b	...(((....))).....	10	50	-3.4	0.4	5	0	0	0	0	0	0	4	0	7.5	21	0	1.88143	0	0	0	0	0	0	2.44021	0	4.10231	7.19301	0	low
47	48	gra-miR167a_L-2R+2	AGATCATCTTGCAGCTTCAAT	21	chr1	+	85867449	85867564	tatgtatcAGATCATCTTGCAGCTTCAATcactcactcatcaacaaaggtttcccagtcggacgccttcacctaggccagtcatcaactcaaaagaggttcaaattatggtacact	3	aof-MIR167c,gra-MIR167b,gra-MIR167a,	gra-MIR167a	tttgagaggttgaagctgccagcatgatctggtgattaacctagctatcactttttcttttttcctccctttttatgtatgttttttctgcctctttagtggtatatatgcagattgaaagaccagttttggattaaatttcttgagttatcttcagcctgcttgaactttatagcttcataggtatggtttcaacaTCAGATCATCTTGCAGCTTCAatcactcact	gra-miR167a	TCAGATCATCTTGCAGCTTCA	5'	Diff	gp2b	..(((((((.......(((.((((((.....................((....)).....(((((((......))))..)))............)))))))))....)))))))..	112	43.1	-21.3	0.4	6.5	2.5	32	0	0	0	2.5	3	2.5	2.5	27.5	4.5	2.44586	5.91497	30.6533	0	0	0	1.71239	1.83016	12.1716	1.36744	9.41941	5.13724	middle
48	48	gra-miR167a_L-2R+2	AGATCATCTTGCAGCTTCAAT	21	chr2	+	307671415	307671528	caatgttagcatgccaacactccaatggaacaaaaccgaaaactaagtgcaatgtttatcagatatggaggatatatacctcgatatgtatcAGATCATCTTGCAGCTTCAATc	3	aof-MIR167c,gra-MIR167b,gra-MIR167a,	gra-MIR167a	tttgagaggttgaagctgccagcatgatctggtgattaacctagctatcactttttcttttttcctccctttttatgtatgttttttctgcctctttagtggtatatatgcagattgaaagaccagttttggattaaatttcttgagttatcttcagcctgcttgaactttatagcttcataggtatggtttcaacaTCAGATCATCTTGCAGCTTCAatcactcact	gra-miR167a	TCAGATCATCTTGCAGCTTCA	3'	Diff	gp2b	...((..(((.(((.....(((((..((.......))..((((..........))))........)))))((((((((......))))))))..........)))))).))...	108	37.7	-18.2	0.4	6.5	2.5	32	0	0	0	2.5	3	2.5	2.5	27.5	4.5	2.44586	5.91497	30.6533	0	0	0	1.71239	1.83016	12.1716	1.36744	9.41941	5.13724	middle
49	49	aof-miR167b_1ss22AT	TGAAGCTGCCAGCATGATCTGT	22	chr11	+	157533859	157533932	ttaggctatattacccctttgatttccatcagatttgttggtgtgagaggtTGAAGCTGCCAGCATGATCTGTt	65	aof-MIR167b,aof-MIR167c,osa-MIR167f,osa-MIR167i,osa-MIR167e,osa-MIR167j,osa-MIR167h,osa-MIR167d,bdi-MIR167e,bdi-MIR167d,bdi-MIR167a,sbi-MIR167e,sbi-MIR167g,sbi-MIR167d,sbi-MIR167c,zma-MIR167g,zma-MIR167f,tae-MIR167c,ata-MIR167b,ata-MIR167f,vca-MIR167b,sof-MIR167b,sof-MIR167a,ssp-MIR167b,mtr-MIR167b,gma-MIR167c,gma-MIR167f,gma-MIR167e,ptc-MIR167d,ptc-MIR167f,ptc-MIR167g,ptc-MIR167b,ath-MIR167d,ath…	aof-MIR167b	gattgtttagtgcaccaaaagtagcTGAAGCTGCCAGCATGATCTGAtctatttttgcccttatcatagaaaggcgcatcagatcatgttgcagtttcatctgctgatgggagcacaagataaacc	aof-miR167b	TGAAGCTGCCAGCATGATCTGA	3'	Diff	gp2b	...((....((((......))))..))..(((((((((((((((...........)).))))))).))))))..	43	41.9	-14.1	0.5	803	124.5	232	38	190.5	97	542	557.5	9	728	945.5	6	302.158	294.565	222.236	171.858	134.419	129.551	371.245	340.105	43.8178	398.198	323.857	6.84966	middle
50	50	aof-miR167c_R+1_3	TGAAGCTGCCAGCATGATCTGT	22	chr7	-	42455126	42455262	catatgcatggctccgtaattattttcacccactctctctctctctctaaaagactataaatccttcccttcccttcccttttgatttccatcagatttgttggtgtgagaggtTGAAGCTGCCAGCATGATCTGTt	65	aof-MIR167c,aof-MIR167b,osa-MIR167f,osa-MIR167i,osa-MIR167e,osa-MIR167j,osa-MIR167h,osa-MIR167d,bdi-MIR167e,bdi-MIR167d,bdi-MIR167a,sbi-MIR167e,sbi-MIR167g,sbi-MIR167d,sbi-MIR167c,zma-MIR167g,zma-MIR167f,tae-MIR167c,ata-MIR167b,ata-MIR167f,vca-MIR167b,sof-MIR167b,sof-MIR167a,ssp-MIR167b,mtr-MIR167b,gma-MIR167c,gma-MIR167f,gma-MIR167e,ptc-MIR167d,ptc-MIR167f,ptc-MIR167g,ptc-MIR167b,ath-MIR167d,ath…	aof-MIR167c	tgtgagtgctTGAAGCTGCCAGCATGATCTGgtcatctaaaacttagatcaattagttatatttatgtgagaaactttgttttggttatctttatcattagtactactacatagagttcttgacgtcattttgatgatttctagcttgtttacatattattttatttgttgataggatttgaggtctaattgcatagaattttgtaagcctgcattcattctcatcagatcatcttgcagcttcaatcactcact	aof-miR167c	TGAAGCTGCCAGCATGATCTG	3'	Diff	gp2b	..(((((.((((....((((..((((((((((...........(((.....)))..........................((((((....)))))).....))).))))))))))).....))))))))).......	128	42.3	-24	0.4	803	124.5	232	38	190.5	97	542	557.5	9	728	945.5	6	302.158	294.565	222.236	171.858	134.419	129.551	371.245	340.105	43.8178	398.198	323.857	6.84966	middle
51	51	vvi-MIR169x-p5_2ss14GC20GA	TTATCCACAAAGCCATTCCA	20	chr4	-	151600278	151600421	ccggacttgcaatatgataTTATCCACAAAGCCATTCCAcatattacgtcatgcatttttaagcaactagaaactctcacctcttctagaagggcagctcgtttgaggtcttggatgatacagaatccgttgttgtaagtcgac	1	vvi-MIR169x,	vvi-MIR169x	gtctcgtctggTAGCCAAGGATGACTTGCCTAaatccaccaggtttcaaaacactgaatgtaattatccacaaagcgattccgtggtctttaggcagtcattccttcggctaaactgaccggctc	vvi-MIR169x-p5	ttatccacaaagcgattccg	5'	New	gp2b	...(((((((((((((.(((((((((....(((..................(((........))).((((((...........))))))...)))..(((....)))....)))))))))))........)))))))))))...	138	41.7	-34.6	0.6	5.5	0	0	0	12.5	0	3	8	0	0	4.5	3	2.06958	0	0	0	8.82015	0	2.05486	4.88043	0	0	1.54136	3.42483	low
52	51	vvi-MIR169x-p5_2ss14GC20GA	TTATCCACAAAGCCATTCCA	20	unanchor357	-	166940	167083	ccggacttgcaatatgataTTATCCACAAAGCCATTCCAcatattacgtcatgcatttttaagcaactagaaccttccacctcttctagaagggcagctcgtttgaggtcttggatgatacagaatctgttgttgtaagtcgac	1	vvi-MIR169x,	vvi-MIR169x	gtctcgtctggTAGCCAAGGATGACTTGCCTAaatccaccaggtttcaaaacactgaatgtaattatccacaaagcgattccgtggtctttaggcagtcattccttcggctaaactgaccggctc	vvi-MIR169x-p5	ttatccacaaagcgattccg	5'	New	gp2b	...(((((((((((((.(((((((((....(((..................(((........))).((((((...........))))))...)))..(((....)))....)))))))))))........)))))))))))...	138	41.7	-34.3	0.6	5.5	0	0	0	12.5	0	3	8	0	0	4.5	3	2.06958	0	0	0	8.82015	0	2.05486	4.88043	0	0	1.54136	3.42483	low
53	52	ssp-MIR169-p3_2ss13GC17AC	CCCCGTCCGGCCCGGACC	18	unanchor1	+	645732	645828	cgtcctcagcggcggaccgggcccaagtcccctggaaaggggcgccagggagggtgagagCCCCGTCCGGCCCGGACCctgccgcaccacgaggcgc	1	ssp-MIR169,	ssp-MIR169	gTAGCCAAGGATGACTTGCCGGccgatgcttcgatggatccctcatccccgtccggccgggaacgtcgcacgtatgtatgtatgcgtgcatatgctgcgaactgtgaggcatccatatcgaccggcaggttcttctctttggctac	ssp-MIR169-p3	ccccgtccggccgggaac	3'	New	gp2b	((.((((.(((((((.(((((((...(.(((((....))))))....(((.((((....))))..))))))))))...))))))).....)))))).	96	77.3	-54.7	0.7	0	0	4.5	0	0	0	0	0	0	4.5	5.5	0	0	0	4.31062	0	0	0	0	0	0	2.46139	1.88388	0	low
54	53	osa-MIR171g-p5_2ss5GA21TG_2	CATGATATTGACTTGGCTCAGC	22	chr11	+	213540164	213540310	gatggaCATGATATTGACTTGGCTCAGCctctagttgagcttcaatgagtctgctactgagagcattgatgaatctgctgctgaggagaagatctctcatctccatgagtatatttgtaggcTGAGCCGGGCCAATATCACTCCttt	38	aof-MIR171b,osa-MIR171g,osa-MIR171b,osa-MIR171c,bdi-MIR171e,sbi-MIR171j,sbi-MIR171c,sbi-MIR171k,sbi-MIR171a,sbi-MIR171b,zma-MIR171g,zma-MIR171i,zma-MIR171j,zma-MIR171f,zma-MIR171c,tae-MIR171b,ata-MIR171c,gma-MIR171u,ptc-MIR171h,ptc-MIR171g,ath-MIR171c,ath-MIR171b,aly-MIR171b,mes-MIR171k,mes-MIR171g,vvi-MIR171d,vvi-MIR171j,nta-MIR479a,nta-MIR171b,csi-MIR171i,sly-MIR171d,bra-MIR171c,bna-MIR171c,bra…	osa-MIR171g	gacatggcatggtattgacttggctcatctcagcaacagcaaactgcatgcagcgctgGAGGTGAGCCGAGCCAATATCacttcatgtc	osa-MIR171g-p5	catggtattgacttggctcatc	5'	New	gp2b	...(((..((((((((.(..((((((((((.(((..((...((((((..(((.......))).))))))....))..)))....(((((.((....)).)))))..............))))))))))..).)))))))).)))...	141	45.6	-54.4	0.8	0	0	0	45	219.5	173.5	0	0	0	1060.5	2115.5	396.5	0	0	0	203.516	154.882	231.722	0	0	0	580.067	724.61	452.648	high
54	54	aof-miR171b_L-1R+2_1ss9CG	TGAGCCGGGCCAATATCACTCC	22	chr11	+	213540164	213540310	gatggaCATGATATTGACTTGGCTCAGCctctagttgagcttcaatgagtctgctactgagagcattgatgaatctgctgctgaggagaagatctctcatctccatgagtatatttgtaggcTGAGCCGGGCCAATATCACTCCttt	38	aof-MIR171b,osa-MIR171g,osa-MIR171b,osa-MIR171c,bdi-MIR171e,sbi-MIR171j,sbi-MIR171c,sbi-MIR171k,sbi-MIR171a,sbi-MIR171b,zma-MIR171g,zma-MIR171i,zma-MIR171j,zma-MIR171f,zma-MIR171c,tae-MIR171b,ata-MIR171c,gma-MIR171u,ptc-MIR171h,ptc-MIR171g,ath-MIR171c,ath-MIR171b,aly-MIR171b,mes-MIR171k,mes-MIR171g,vvi-MIR171d,vvi-MIR171j,nta-MIR479a,nta-MIR171b,csi-MIR171i,sly-MIR171d,bra-MIR171c,bna-MIR171c,bra…	aof-MIR171b	cgcggtggatgattaaaagaagcgatattggtgaggttcaatccgatgattgaatttacacgacgatggtagaactgtctcagaTTGAGCCGCGCCAATATCACTtccctccatt	aof-miR171b	TTGAGCCGCGCCAATATCACT	3'	Diff	gp2b	...(((..((((((((.(..((((((((((.(((..((...((((((..(((.......))).))))))....))..)))....(((((.((....)).)))))..............))))))))))..).)))))))).)))...	141	45.6	-54.4	0.8	2.5	3	0	76	650	312	0	0	0	1669	1998.5	99.5	0.940716	7.09796	0	343.717	458.648	416.699	0	0	0	912.902	684.534	113.59	high
55	53	osa-MIR171g-p5_2ss5GA21TG_2	CATGATATTGACTTGGCTCAGC	22	chr6	+	290768847	290768983	gatggaCATGATATTGACTTGGCTCAGCctcttgatgaatctgctactgagagcatcaatgaatatgctactgaggagaaaatctctgatctccatgagtatacttgtaggcTGAGCCGTGCCAATATCACTCCttt	34	aof-MIR171b,osa-MIR171b,osa-MIR171c,osa-MIR171g,bdi-MIR171e,sbi-MIR171a,sbi-MIR171k,sbi-MIR171b,sbi-MIR171j,sbi-MIR171c,zma-MIR171i,zma-MIR171j,zma-MIR171f,zma-MIR171c,zma-MIR171g,tae-MIR171b,ata-MIR171c,gma-MIR171u,ptc-MIR171h,ptc-MIR171g,ath-MIR171c,ath-MIR171b,aly-MIR171b,mes-MIR171k,mes-MIR171g,vvi-MIR171d,vvi-MIR171j,nta-MIR171b,csi-MIR171i,sly-MIR171d,bra-MIR171d,bna-MIR171b,bra-MIR171b,bna…	osa-MIR171g	gacatggcatggtattgacttggctcatctcagcaacagcaaactgcatgcagcgctgGAGGTGAGCCGAGCCAATATCacttcatgtc	osa-MIR171g-p5	catggtattgacttggctcatc	5'	New	gp2b	...(((..((((((((...(((((((((((.((((((..((.......))...))))))....((((((.....(((((..........)))))...)))))).....)))))))))))...)))))))).)))...	131	43.1	-48.8	0.8	0	0	0	45	219.5	173.5	0	0	0	1060.5	2115.5	396.5	0	0	0	203.516	154.882	231.722	0	0	0	580.067	724.61	452.648	high
55	55	aof-miR171b_L-1R+2_1ss9CT	TGAGCCGTGCCAATATCACTCC	22	chr6	+	290768847	290768983	gatggaCATGATATTGACTTGGCTCAGCctcttgatgaatctgctactgagagcatcaatgaatatgctactgaggagaaaatctctgatctccatgagtatacttgtaggcTGAGCCGTGCCAATATCACTCCttt	34	aof-MIR171b,osa-MIR171b,osa-MIR171c,osa-MIR171g,bdi-MIR171e,sbi-MIR171a,sbi-MIR171k,sbi-MIR171b,sbi-MIR171j,sbi-MIR171c,zma-MIR171i,zma-MIR171j,zma-MIR171f,zma-MIR171c,zma-MIR171g,tae-MIR171b,ata-MIR171c,gma-MIR171u,ptc-MIR171h,ptc-MIR171g,ath-MIR171c,ath-MIR171b,aly-MIR171b,mes-MIR171k,mes-MIR171g,vvi-MIR171d,vvi-MIR171j,nta-MIR171b,csi-MIR171i,sly-MIR171d,bra-MIR171d,bna-MIR171b,bra-MIR171b,bna…	aof-MIR171b	cgcggtggatgattaaaagaagcgatattggtgaggttcaatccgatgattgaatttacacgacgatggtagaactgtctcagaTTGAGCCGCGCCAATATCACTtccctccatt	aof-miR171b	TTGAGCCGCGCCAATATCACT	3'	Diff	gp2b	...(((..((((((((...(((((((((((.((((((..((.......))...))))))....((((((.....(((((..........)))))...)))))).....)))))))))))...)))))))).)))...	131	43.1	-48.8	0.8	0	0	0	3	9.5	23.5	0	0	0	49.5	21	11.5	0	0	0	13.5678	6.70331	31.386	0	0	0	27.0753	7.19301	13.1285	middle
56	56	osa-MIR171g-p5_2ss5GA21TG_1	CATGATATTGACTTGGCTCAG	21	unanchor648	+	908660	908796	aCATGATATTGACTTGGCTCAGcctctagttgagcttcaatgaatctgctactgtgagcattgatgaatctgctgctgaggagatctctcatctccatgagtatatttgtaggcTGAGCCGGGCCAATATCACTCCt	38	aof-MIR171b,osa-MIR171g,osa-MIR171c,osa-MIR171b,bdi-MIR171e,sbi-MIR171c,sbi-MIR171j,sbi-MIR171b,sbi-MIR171k,sbi-MIR171a,zma-MIR171g,zma-MIR171c,zma-MIR171f,zma-MIR171j,zma-MIR171i,tae-MIR171b,ata-MIR171c,gma-MIR171u,ptc-MIR171g,ptc-MIR171h,ath-MIR171b,ath-MIR171c,aly-MIR171b,mes-MIR171g,mes-MIR171k,vvi-MIR171d,vvi-MIR171j,nta-MIR479a,nta-MIR171b,csi-MIR171i,sly-MIR171d,bra-MIR171c,bna-MIR171c,bra…	osa-MIR171g	gacatggcatggtattgacttggctcatctcagcaacagcaaactgcatgcagcgctgGAGGTGAGCCGAGCCAATATCacttcatgtc	osa-MIR171g-p5	catggtattgacttggctcat	5'	New	gp2b	...((((((((.(..((((((((((.(((..((...((((((..((.((....)))).))))))....))..)))....((((((.....))))))..............))))))))))..).)))))))).....	129	45.3	-49.6	0.8	0	0	0	45	219.5	173.5	0	0	0	1060.5	2115.5	396.5	0	0	0	203.516	154.882	231.722	0	0	0	580.067	724.61	452.648	high
56	54	aof-miR171b_L-1R+2_1ss9CG	TGAGCCGGGCCAATATCACTCC	22	unanchor648	+	908660	908796	aCATGATATTGACTTGGCTCAGcctctagttgagcttcaatgaatctgctactgtgagcattgatgaatctgctgctgaggagatctctcatctccatgagtatatttgtaggcTGAGCCGGGCCAATATCACTCCt	38	aof-MIR171b,osa-MIR171g,osa-MIR171c,osa-MIR171b,bdi-MIR171e,sbi-MIR171c,sbi-MIR171j,sbi-MIR171b,sbi-MIR171k,sbi-MIR171a,zma-MIR171g,zma-MIR171c,zma-MIR171f,zma-MIR171j,zma-MIR171i,tae-MIR171b,ata-MIR171c,gma-MIR171u,ptc-MIR171g,ptc-MIR171h,ath-MIR171b,ath-MIR171c,aly-MIR171b,mes-MIR171g,mes-MIR171k,vvi-MIR171d,vvi-MIR171j,nta-MIR479a,nta-MIR171b,csi-MIR171i,sly-MIR171d,bra-MIR171c,bna-MIR171c,bra…	aof-MIR171b	cgcggtggatgattaaaagaagcgatattggtgaggttcaatccgatgattgaatttacacgacgatggtagaactgtctcagaTTGAGCCGCGCCAATATCACTtccctccatt	aof-miR171b	TTGAGCCGCGCCAATATCACT	3'	Diff	gp2b	...((((((((.(..((((((((((.(((..((...((((((..((.((....)))).))))))....))..)))....((((((.....))))))..............))))))))))..).)))))))).....	129	45.3	-49.6	0.8	2.5	3	0	76	650	312	0	0	0	1669	1998.5	99.5	0.940716	7.09796	0	343.717	458.648	416.699	0	0	0	912.902	684.534	113.59	high
57	57	osa-miR171b_R+3	TGATTGAGCCGTGCCAATATCCCA	24	chr2	-	286983384	286983494	ttattagtaagcagaagaagagcctccttgaaataaaaggcagaacgaaagagaggcttccctataactggatgagaagggagctgtTGATTGAGCCGCGCCAATATCCCA	40	osa-MIR171d,osa-MIR171f,bdi-MIR171b,sbi-MIR171d,sbi-MIR171a,zma-MIR171i,zma-MIR171d,zma-MIR171f,tae-MIR171a,ata-MIR171b,far-MIR171,mtr-MIR171d,gma-MIR171f,gma-MIR171c,gma-MIR171q,gma-MIR171j,gma-MIR171o,ptc-MIR171e,ptc-MIR171i,ptc-MIR171g,ptc-MIR171h,mdm-MIR171m,mdm-MIR171n,mdm-MIR171o,lja-MIR171a,ppe-MIR171f,ppe-MIR171g,mes-MIR171g,mes-MIR171k,mes-MIR171j,mes-MIR171i,nta-MIR171c,csi-MIR171h,lus-…	osa-MIR171f	gggagagtgcgaTGTTGGCATGGTTCAATCAAAccgggcaaacttatgcactagctaagcaagatgcagggatatgcagtatggttttgtttggtcTGATTGAGCCGTGCCAATATCacaagcttgc	osa-miR171b	TGATTGAGCCGTGCCAATATC	3'	Diff	gp2b	...............((..((((((((((...................))).)))))))..))......(((((.....((.((.(((.....))).)).))..)))))..	40	45	-22.4	0.4	9	0	0	0	0	0	0	0	0	0	0	0	3.38658	0	0	0	0	0	0	0	0	0	0	0	low
58	58	bdi-MIR172a-p3_2ss8AG17TA	GATTCACGTCGGGTTCACCA	20	chr1	-	75295043	75295075	acaacggagttatCATTCACGTCGGGTTCACCA	1	bdi-MIR172a,	bdi-MIR172a	aggcggcacgcacagtcggcgcttgcaggtGCAGCACCACCAAGATTCACAtcgggttctccagtcgtaattaattaacgaggagtacaaccatgatgAGAATCTTGATGATGCTGCATcggcaaccgctcgactactcatcatatcgtcaat	bdi-MIR172a-p3	GATTCACAtcgggttctcca	3'	New	gp2b	...(((((((....)))).))).((.....)).	19	48.5	-5	0.3	8	3	7.5	0	10.5	3.5	13.5	17.5	0	9	27.5	8	3.01029	7.09796	7.18437	0	7.40893	4.67451	9.24689	10.6759	0	4.92278	9.41941	9.13288	middle
59	59	aof-miR172_L-3	ATCTTGATGATGCTGCAT	18	chr11	+	15604497	15604606	gtcgctgaccgcgggtgtggcaccatcaagattcacatcattttgatcaccgctttgctcgatctgtacgaaatgagaATCTTGATGATGCTGCATcagcagtaagcaac	106	aof-MIR172,osa-MIR172a,osa-MIR172d,osa-MIR172b,bdi-MIR172b,bdi-MIR172a,sbi-MIR172d,sbi-MIR172c,sbi-MIR172a,sbi-MIR172b,zma-MIR172c,zma-MIR172e,zma-MIR172d,zma-MIR172b,zma-MIR172a,ata-MIR172c,ata-MIR172b,vca-MIR172b,vca-MIR172a,egu-MIR172b,egu-MIR172a,egu-MIR172c,mtr-MIR172b,mtr-MIR172c,gma-MIR172i,gma-MIR172k,gma-MIR172b,gma-MIR172g,gma-MIR172l,gma-MIR172j,gma-MIR172f,gma-MIR172h,gma-MIR172a,ptc-…	aof-MIR172	ctgtttgcaggtgcagcatcttcaagattcacaatattattgagaggcctcctttgatttactcagggacttgAGAATCTTGATGATGCTGCATcagcaataag	aof-miR172	AGAATCTTGATGATGCTGCAT	3'	Diff	gp2b	...(((.((.((.((((..(((.(((((((((((...(((((((((((...((...))..)))).....)))))))))))))))))).)))..)))).)).)).)))...	104	48.2	-43.4	0.8	0	0	0	0	7.5	6.5	0	0	0	3	0	0	0	0	0	0	5.29209	8.68123	0	0	0	1.64093	0	0	low
60	59	aof-miR172_L-3	ATCTTGATGATGCTGCAT	18	chr11	+	21079745	21079790	tttggcctcattctggagtaacatgagaATCTTGATGATGCTGCAT	106	aof-MIR172,osa-MIR172b,osa-MIR172a,osa-MIR172d,bdi-MIR172b,bdi-MIR172a,sbi-MIR172b,sbi-MIR172d,sbi-MIR172c,sbi-MIR172a,zma-MIR172a,zma-MIR172c,zma-MIR172e,zma-MIR172d,zma-MIR172b,ata-MIR172b,ata-MIR172c,vca-MIR172a,vca-MIR172b,egu-MIR172a,egu-MIR172c,egu-MIR172b,mtr-MIR172b,mtr-MIR172c,gma-MIR172l,gma-MIR172j,gma-MIR172f,gma-MIR172h,gma-MIR172a,gma-MIR172i,gma-MIR172b,gma-MIR172k,gma-MIR172g,ptc-…	aof-MIR172	ctgtttgcaggtgcagcatcttcaagattcacaatattattgagaggcctcctttgatttactcagggacttgAGAATCTTGATGATGCTGCATcagcaataag	aof-miR172	AGAATCTTGATGATGCTGCAT	3'	Diff	gp2b	...(((.(((((..(((............))).))))).)))....	39	41.3	-7.7	0.4	0	0	0	0	7.5	6.5	0	0	0	3	0	0	0	0	0	0	5.29209	8.68123	0	0	0	1.64093	0	0	low
61	60	bdi-MIR172a-p5_2ss8AG17TA	GATTCACGTCGGGTTCACCA	20	chr3	+	216512047	216512072	GATTCACGTTGGGTTCACCAtcgacc	1	bdi-MIR172a,	bdi-MIR172a	aggcggcacgcacagtcggcgcttgcaggtGCAGCACCACCAAGATTCACAtcgggttctccagtcgtaattaattaacgaggagtacaaccatgatgAGAATCTTGATGATGCTGCATcggcaaccgctcgactactcatcatatcgtcaat	bdi-MIR172a-p5	GATTCACAtcgggttctcca	5'	New	gp2b	......((.(((.....))).))...	17	53.8	-4.7	0.3	8	3	7.5	0	10.5	3.5	13.5	17.5	0	9	27.5	8	3.01029	7.09796	7.18437	0	7.40893	4.67451	9.24689	10.6759	0	4.92278	9.41941	9.13288	middle
62	61	nta-MIR172f-p5_2ss15CG19TA	ATTGGAACGATACAGAGAA	19	chr6	+	274544954	274544999	ATTGGAACGATACAGAGAAgatggatgatgcacacaatttctgaaa	2	nta-MIR172f,nta-MIR172e,	nta-MIR172f	tctgaaggtgAGAATCTTGATGATGCTGCATcagcaataaacgactacctgatttatcattatgccattggaacgatacacagataattagcataattcatgtgcaagaatgccacgggtacatggtatggttcaattgatacagtcgttgtttgcgggtgtagcatcatcaagattcacatgaaaaggc	nta-MIR172f-p5	attggaacgatacacagat	5'	New	gp2b	............((((((...((.........))...))))))...	31	37	-4.3	0.3	3.5	6	0	15.5	25	37	3	8	9	10.5	9	71	1.317	14.1959	0	70.1001	17.6403	49.4162	2.05486	4.88043	43.8178	5.74324	3.08272	81.0543	middle
63	61	nta-MIR172f-p5_2ss15CG19TA	ATTGGAACGATACAGAGAA	19	chr6	+	274761652	274761727	aaATTGGAACGATACAGAGAAgattaatgtcccatttgcaaggatgatacacacaatttctgaaataatccaaaca	2	nta-MIR172f,nta-MIR172e,	nta-MIR172f	tctgaaggtgAGAATCTTGATGATGCTGCATcagcaataaacgactacctgatttatcattatgccattggaacgatacacagataattagcataattcatgtgcaagaatgccacgggtacatggtatggttcaattgatacagtcgttgtttgcgggtgtagcatcatcaagattcacatgaaaaggc	nta-MIR172f-p5	attggaacgatacacagat	5'	New	gp2b	...(((((......((((((.......(((..((((......))))..))).....))))))......)))))...	70	32.9	-11.5	0.5	3.5	6	0	15.5	25	37	3	8	9	10.5	9	71	1.317	14.1959	0	70.1001	17.6403	49.4162	2.05486	4.88043	43.8178	5.74324	3.08272	81.0543	middle
64	62	nta-MIR172f-p3_2ss14CG18TA	TTGGAACGATACAGAGAA	18	chr9	+	29954586	29954620	tgcccaatgtaataaaaTTGGAACGATACAGAGAA	2	nta-MIR172f,nta-MIR172e,	nta-MIR172f	tctgaaggtgAGAATCTTGATGATGCTGCATcagcaataaacgactacctgatttatcattatgccattggaacgatacacagataattagcataattcatgtgcaagaatgccacgggtacatggtatggttcaattgatacagtcgttgtttgcgggtgtagcatcatcaagattcacatgaaaaggc	nta-MIR172f-p3	ttggaacgatacacagat	3'	New	gp2b	...(((((........)))))..............	18	34.3	-4.7	0.4	0	3.5	0	5.5	15	13	0	0	3	7.5	6.5	46.5	0	8.28095	0	24.8742	10.5842	17.3625	0	0	14.6059	4.10231	2.22641	53.0849	middle
65	63	lus-MIR172d-p5_2ss9CA17AT	TCAAGATTAACATGTATAGCT	21	chr9	-	100404125	100404182	ttttgTCAAGATTAACATGTATAGCTtggaagagctactactagagatggtgacaggg	1	lus-MIR172d,	lus-MIR172d	gcgagcgtgagtcgttgtttgctggcgtggcatcatcaagattcacatgtaaagctagtagctaatactaccccggccagtagtaggacatggactgatgAGAATCTTGATGATGCTGCATcggcagtcgacgactgcatacgaaaagt	lus-MIR172d-p5	tcaagattcacatgtaaagct	5'	New	gp2b	(..(((((..(((.....(((((((((....)))))).)))....)))..)))))..)	58	39.7	-14.6	0.6	30	9	6	6	9	5	13	30	9	16	19	19	11.2886	21.2939	5.7475	27.1355	6.35051	6.67787	8.90441	18.3016	43.8178	8.7516	6.50796	21.6906	middle
66	64	mtr-MIR319b-p5_1ss2GT	ATCTGCTGACTCATTCATCCA	21	chr11	+	202064275	202064434	tATCTGCTGACTCATTCATCCAagtgccaagttaaagatgtataaagatatatcacttggtatgtgagtgaatgatgcgggagataaacttagatcctatgctgcctttgCTTGGACTGAAGGGAGCTCCCttctctttgtaatttgcccttgcatgtta	89	aof-MIR319a,aof-MIR319b,bdi-MIR319a,tae-MIR319,mtr-MIR319b,mtr-MIR319d,mtr-MIR319a,mtr-MIR319c,gma-MIR319m,gma-MIR319k,gma-MIR319b,gma-MIR319a,gma-MIR319h,gma-MIR319j,gma-MIR319e,gma-MIR319o,gma-MIR319d,gma-MIR319i,gma-MIR319q,gma-MIR319l,gma-MIR319c,gma-MIR319g,gma-MIR319p,ptc-MIR319c,ptc-MIR319d,ptc-MIR319a,ptc-MIR319b,ptc-MIR319e,ptc-MIR319f,ptc-MIR319h,ptc-MIR319g,ath-MIR319b,ath-MIR319a,ath-…	mtr-MIR319b	taagaGAGCTTTCTTTAGTCCACTCAtgggtgacaataagatttcaattagctgctgactcattcatccaaatgttgagtaaaatatatagaaacatatactcatcaaatgagtgaatgatgcgggagacaaattgaatcttaagtttcctatacTTGGACTGAAGGGAGCTCCCttttc	mtr-MIR319b-p5	agctgctgactcattcatcca	5'	New	gp2b	(((((.(((..(((((((..((..((((((((....(((((((....)))))))))))))))..))..)))))))..))).)))))...........(((((.((..((((..(((..((((((....)))))))))..))))...))....)))))...	86	40.6	-55.9	0.9	0	0	0	0	0	0	0	0	0	0	63.5	11	0	0	0	0	0	0	0	0	0	0	21.7503	12.5577	middle
66	65	mtr-miR319a-3p_L+1	CTTGGACTGAAGGGAGCTCCC	21	chr11	+	202064275	202064434	tATCTGCTGACTCATTCATCCAagtgccaagttaaagatgtataaagatatatcacttggtatgtgagtgaatgatgcgggagataaacttagatcctatgctgcctttgCTTGGACTGAAGGGAGCTCCCttctctttgtaatttgcccttgcatgtta	89	aof-MIR319a,aof-MIR319b,bdi-MIR319a,tae-MIR319,mtr-MIR319b,mtr-MIR319d,mtr-MIR319a,mtr-MIR319c,gma-MIR319m,gma-MIR319k,gma-MIR319b,gma-MIR319a,gma-MIR319h,gma-MIR319j,gma-MIR319e,gma-MIR319o,gma-MIR319d,gma-MIR319i,gma-MIR319q,gma-MIR319l,gma-MIR319c,gma-MIR319g,gma-MIR319p,ptc-MIR319c,ptc-MIR319d,ptc-MIR319a,ptc-MIR319b,ptc-MIR319e,ptc-MIR319f,ptc-MIR319h,ptc-MIR319g,ath-MIR319b,ath-MIR319a,ath-…	mtr-MIR319c	cagaaatgGGAGTTCCTTGCAGCCCAAAGcgccaagtgagaattctactggcaaattatgttTTGGACTGAAGGGAGCTCCCagttctt	mtr-miR319a-3p	TTGGACTGAAGGGAGCTCCC	3'	Diff	gp2b	(((((.(((..(((((((..((..((((((((....(((((((....)))))))))))))))..))..)))))))..))).)))))...........(((((.((..((((..(((..((((((....)))))))))..))))...))....)))))...	86	40.6	-55.9	0.9	6	0	0	7	108	8.5	0	7.5	0	116.5	426.5	149	2.25772	0	0	31.6581	76.2061	11.3524	0	4.5754	0	63.7226	146.087	170.1	middle
67	64	mtr-MIR319b-p5_1ss2GT	ATCTGCTGACTCATTCATCCA	21	chr6	+	280410360	280410520	ATCTGCTGACTCATTCATCCAagtgccaggttaaagatgtatgaaggatatatcacttggtatgtgagtgaatgatgcgggagataaaacttagatcctatgctgcctttgcTTGGACTGAAGGGAGCTCCCttctctttgtaatttgcccttgcatgtta	90	aof-MIR319a,aof-MIR319b,bdi-MIR319a,tae-MIR319,mtr-MIR319d,mtr-MIR319b,mtr-MIR319c,mtr-MIR319a,gma-MIR319m,gma-MIR319k,gma-MIR319a,gma-MIR319b,gma-MIR319h,gma-MIR319j,gma-MIR319e,gma-MIR319l,gma-MIR319d,gma-MIR319q,gma-MIR319o,gma-MIR319c,gma-MIR319g,gma-MIR319i,gma-MIR319p,ptc-MIR319b,ptc-MIR319d,ptc-MIR319c,ptc-MIR319a,ptc-MIR319f,ptc-MIR319e,ptc-MIR319h,ptc-MIR319g,ath-MIR319b,ath-MIR319a,ath-…	mtr-MIR319b	taagaGAGCTTTCTTTAGTCCACTCAtgggtgacaataagatttcaattagctgctgactcattcatccaaatgttgagtaaaatatatagaaacatatactcatcaaatgagtgaatgatgcgggagacaaattgaatcttaagtttcctatacTTGGACTGAAGGGAGCTCCCttttc	mtr-MIR319b-p5	agctgctgactcattcatcca	5'	New	gp2b	((((.(((..(((((((..((..((((((((....(((((((.....)))))))))))))))..))..)))))))..))).)))).............(((((.((..((((..(((..((((((....)))))))))..))))...))....)))))...	85	42.2	-54.3	0.8	0	0	0	0	0	0	0	0	0	0	63.5	11	0	0	0	0	0	0	0	0	0	0	21.7503	12.5577	middle
67	66	mtr-miR319a-3p	TTGGACTGAAGGGAGCTCCC	20	chr6	+	280410360	280410520	ATCTGCTGACTCATTCATCCAagtgccaggttaaagatgtatgaaggatatatcacttggtatgtgagtgaatgatgcgggagataaaacttagatcctatgctgcctttgcTTGGACTGAAGGGAGCTCCCttctctttgtaatttgcccttgcatgtta	90	aof-MIR319a,aof-MIR319b,bdi-MIR319a,tae-MIR319,mtr-MIR319d,mtr-MIR319b,mtr-MIR319c,mtr-MIR319a,gma-MIR319m,gma-MIR319k,gma-MIR319a,gma-MIR319b,gma-MIR319h,gma-MIR319j,gma-MIR319e,gma-MIR319l,gma-MIR319d,gma-MIR319q,gma-MIR319o,gma-MIR319c,gma-MIR319g,gma-MIR319i,gma-MIR319p,ptc-MIR319b,ptc-MIR319d,ptc-MIR319c,ptc-MIR319a,ptc-MIR319f,ptc-MIR319e,ptc-MIR319h,ptc-MIR319g,ath-MIR319b,ath-MIR319a,ath-…	mtr-MIR319a	attattagaaatagatgaagAGAGCTTCCTTCAGTCCACTCatggaagggtaaggggtttgaattacctgctgactcattgattcaaacacaatagacaattatggggttatgctattgtgaatgtgtgaatgatgcaggaggtgaatttcttccttttcttctttgcTTGGACTGAAGGGAGCTCCCtttttctatttataaatta	mtr-miR319a-3p	TTGGACTGAAGGGAGCTCCC	3'	Yes	gp2b	((((.(((..(((((((..((..((((((((....(((((((.....)))))))))))))))..))..)))))))..))).)))).............(((((.((..((((..(((..((((((....)))))))))..))))...))....)))))...	85	42.2	-54.3	0.8	163	10	19.5	101	1263	68.5	81.5	145.5	0	885.5	3500.5	537	61.3347	23.6599	18.6794	456.781	891.188	91.4868	55.8238	88.7627	0	484.347	1199.01	613.045	high
68	67	mtr-MIR319b-p5	TAGCTGCTGACTCATTCATCC	21	chr7	+	209353991	209354123	TAGCTGCTGACTCATTCATCCaaatgccaattaattagaaaaaaacacttggtatatgagtgaatgatgcaggagctaagttggcccctatgttgtctgtacTTGGACTGAAGGGAGCTCCCTttgtctatag	70	aof-MIR319a,bdi-MIR319a,tae-MIR319,mtr-MIR319a,mtr-MIR319d,mtr-MIR319b,mtr-MIR319c,gma-MIR319h,gma-MIR319j,gma-MIR319e,gma-MIR319m,gma-MIR319k,gma-MIR319a,gma-MIR319b,gma-MIR319g,gma-MIR319q,gma-MIR319c,ptc-MIR319b,ptc-MIR319a,ptc-MIR319c,ptc-MIR319d,ptc-MIR319g,ptc-MIR319f,ath-MIR319b,ath-MIR319a,mdm-MIR319a,mdm-MIR319e,mdm-MIR319g,mdm-MIR319b,mdm-MIR319f,mdm-MIR319c,mdm-MIR319h,stu-MIR319a,aly-…	mtr-MIR319b	taagaGAGCTTTCTTTAGTCCACTCAtgggtgacaataagatttcaattagctgctgactcattcatccaaatgttgagtaaaatatatagaaacatatactcatcaaatgagtgaatgatgcgggagacaaattgaatcttaagtttcctatacTTGGACTGAAGGGAGCTCCCttttc	mtr-MIR319b-p5	tagctgctgactcattcatcc	5'	New	gp2b	(((((.(((..(((((((..((.(((((((..................))))))).))..)))))))..))).))))).........................(((((.((((((....)))))))))))...	78	41.4	-42.1	0.8	0	0	0	0	0	0	0	0	0	0	3.5	12.5	0	0	0	0	0	0	0	0	0	0	1.19883	14.2701	middle
68	68	aof-miR319a	TTGGACTGAAGGGAGCTCCCT	21	chr7	+	209353991	209354123	TAGCTGCTGACTCATTCATCCaaatgccaattaattagaaaaaaacacttggtatatgagtgaatgatgcaggagctaagttggcccctatgttgtctgtacTTGGACTGAAGGGAGCTCCCTttgtctatag	70	aof-MIR319a,bdi-MIR319a,tae-MIR319,mtr-MIR319a,mtr-MIR319d,mtr-MIR319b,mtr-MIR319c,gma-MIR319h,gma-MIR319j,gma-MIR319e,gma-MIR319m,gma-MIR319k,gma-MIR319a,gma-MIR319b,gma-MIR319g,gma-MIR319q,gma-MIR319c,ptc-MIR319b,ptc-MIR319a,ptc-MIR319c,ptc-MIR319d,ptc-MIR319g,ptc-MIR319f,ath-MIR319b,ath-MIR319a,mdm-MIR319a,mdm-MIR319e,mdm-MIR319g,mdm-MIR319b,mdm-MIR319f,mdm-MIR319c,mdm-MIR319h,stu-MIR319a,aly-…	aof-MIR319a	gaataggatcccctgaagagagcttccttcagtccactcatgggcagctgtagggttgaattagctgctgactcattcattcaaatactaagtcagagaaagagacttggtagatgagtgaatgatgcaggagataaagttagactctatgcggtctttgcTTGGACTGAAGGGAGCTCCCTtcgtctatag	aof-miR319a	TTGGACTGAAGGGAGCTCCCT	3'	Yes	gp2b	(((((.(((..(((((((..((.(((((((..................))))))).))..)))))))..))).))))).........................(((((.((((((....)))))))))))...	78	41.4	-42.1	0.8	173.5	10	22.5	120	1388.5	82	89	161.5	0	1118	16003	577.5	65.2857	23.6599	21.5531	542.71	979.742	109.517	60.961	98.5236	0	611.518	5481.41	659.28	high
69	68	aof-miR319a	TTGGACTGAAGGGAGCTCCCT	21	chr2	+	10710337	10710393	tgcgggagccaattccatcctttccactctatgcTTGGACTGAAGGGAGCTCCCTct	86	aof-MIR319a,aof-MIR319b,bdi-MIR319a,tae-MIR319,mtr-MIR319a,mtr-MIR319b,mtr-MIR319d,mtr-MIR319c,gma-MIR319e,gma-MIR319j,gma-MIR319h,gma-MIR319b,gma-MIR319a,gma-MIR319k,gma-MIR319m,gma-MIR319p,gma-MIR319g,gma-MIR319c,gma-MIR319l,gma-MIR319q,ptc-MIR319c,ptc-MIR319d,ptc-MIR319a,ptc-MIR319b,ptc-MIR319g,ptc-MIR319h,ptc-MIR319e,ptc-MIR319f,ath-MIR319a,ath-MIR319b,ath-MIR319c,mdm-MIR319a,mdm-MIR319g,mdm-…	aof-MIR319a	gaataggatcccctgaagagagcttccttcagtccactcatgggcagctgtagggttgaattagctgctgactcattcattcaaatactaagtcagagaaagagacttggtagatgagtgaatgatgcaggagataaagttagactctatgcggtctttgcTTGGACTGAAGGGAGCTCCCTtcgtctatag	aof-miR319a	TTGGACTGAAGGGAGCTCCCT	3'	Yes	gp2b	...((((((........(((((((...((((....))))..)))))))))))))...	51	54.4	-20.4	0.7	173.5	10	22.5	120	1388.5	82	89	161.5	0	1118	16003	577.5	65.2857	23.6599	21.5531	542.71	979.742	109.517	60.961	98.5236	0	611.518	5481.41	659.28	high
70	69	stu-miR391-5p_2ss1TC2AT	CTCGCAGGAGAGATGATGCTG	21	chr4	-	85986768	85986899	agtttatttttcCTCGCAGGAGAGATGATGCTGccgctccgtcgcccgcagaaaagaaactaatgagtatttctttaactggggcagaagacaagatagtggtatcatctcagctgcgatgaaaaatgattg	3	vca-MIR391,stu-MIR391,sly-MIR391,	stu-MIR391	TACGCAGGAGAGATGATGCTGgacgatagagatatgagaatattaaaggggctttaatttattggccaGCATCATACTCCTGCATATT	stu-miR391-5p	TACGCAGGAGAGATGATGCTG	5'	Diff	gp2b	...(((((((((.((((((..((((((((((..(..((..(((((((.(((.(((((((((....)))..))))))..)))))))....))).))...)..))))))))))..)))))).)))))))))...	126	43.9	-54.1	0.9	197	16	13	2.5	27.5	10	118.5	281	0	28.5	50.5	12.5	74.1284	37.8558	12.4529	11.3065	19.4043	13.3557	81.1671	171.425	0	15.5888	17.2975	14.2701	middle
71	69	stu-miR391-5p_2ss1TC2AT	CTCGCAGGAGAGATGATGCTG	21	chr5	-	89002179	89002273	CTCGCAGGAGAGATGATGCTGccactcggtcgcccgttgaaaagaaacgaagtatttctttttactgatgcaaaagatggtggtatcatctcaca	3	vca-MIR391,stu-MIR391,sly-MIR391,	stu-MIR391	TACGCAGGAGAGATGATGCTGgacgatagagatatgagaatattaaaggggctttaatttattggccaGCATCATACTCCTGCATATT	stu-miR391-5p	TACGCAGGAGAGATGATGCTG	5'	Diff	gp2b	.........((((((((((..(((.((....((....((((((((((.......)))))))))).....))....)))))..))))))))))...	83	45.3	-32.4	0.8	197	16	13	2.5	27.5	10	118.5	281	0	28.5	50.5	12.5	74.1284	37.8558	12.4529	11.3065	19.4043	13.3557	81.1671	171.425	0	15.5888	17.2975	14.2701	middle
72	70	vca-MIR391-p5_2ss1TC20CT	CTCGCAGGAGAGATGATGCT	20	unanchor392	-	423540	423655	agttttcCTCGCAGGAGAGATGATGCTgccgctcggtcgcccgttgaaaagaaacgaagtatttctttttactgatggaaaagatggtggtatcatctcagctgcgatggaaattg	3	vca-MIR391,stu-MIR391,sly-MIR391,	vca-MIR391	ggtttccTTCGCAGGAGAGATGATGCCGtcccctattattattattataataaggatacgGCATCGTCTCTCCGGCGACGGtaacc	vca-MIR391-p5	TTCGCAGGAGAGATGATGCC	5'	New	gp2b	...(((((((((((..((((((((((..(((.((......((((((((((((((.......)))))))))...)))))....)))))..))))))))))..)))))).)))))...	110	45.7	-49	0.9	18	0	0	0	4	7.5	20	26	0	0	0	21	6.77316	0	0	0	2.82245	10.0168	13.6991	15.8614	0	0	0	23.9738	middle
73	71	aof-miR394	TTGGCATTCTGTCCACCTCC	20	chr4	+	293702468	293702626	tatcaaagggtttcttaccgagttcaTTGGCATTCTGTCCACCTCCaaactctttctttcttcttcttcttcttcttcttcttcttctgcgtcttcttcttggaaaaaaatggaggtggacatccttgccaatagagctatgttggattctctttgcaa	50	aof-MIR394,osa-MIR394,bdi-MIR394,sbi-MIR394a,sbi-MIR394b,zma-MIR394a,zma-MIR394b,ata-MIR394,gma-MIR394b,gma-MIR394e,gma-MIR394d,gma-MIR394g,gma-MIR394c,gma-MIR394f,gma-MIR394a,ptc-MIR394a,ptc-MIR394b,ath-MIR394a,ath-MIR394b,mdm-MIR394b,mdm-MIR394a,stu-MIR384,aly-MIR394b,aly-MIR394a,ppe-MIR394a,ppe-MIR394b,mes-MIR394b,mes-MIR394c,mes-MIR394a,vvi-MIR394c,vvi-MIR394b,vvi-MIR394a,nta-MIR394,csi-MIR39…	aof-MIR394	gagaaatcttTTGGCATTCTGTCCACCTCCataacttagccattctcatttcagatgtagaatgataaataaatgaagaacaggaggtggatagtttgccaacagagctct	aof-miR394	TTGGCATTCTGTCCACCTCC	5'	Yes	gp2b	...(((((((..(((.....((((((((((((...((((((((((((.....(((((............................................)))))....))))))))))))....))))))).))))).....)))..)))))))...	153	40.3	-50.087	0.8	49.5	16.5	40.5	41.5	601	213.5	24	20	11.5	82.5	377	49	18.6262	39.0388	38.7956	187.687	424.073	285.145	16.4389	12.2011	55.9894	45.1255	129.132	55.9389	middle
74	71	aof-miR394	TTGGCATTCTGTCCACCTCC	20	unanchor428	+	953586	953763	atcatatgggtttatcaaagggtttcttacagagttccTTGGCATTCTGTCCACCTCCaaactcttccttttctttctttttctaggtttttcttttttttttttttgttggaaaaaaaatggaggtggacatacatgccaacagagttctgttggattctctttgcaaaacccgtgt	50	aof-MIR394,osa-MIR394,bdi-MIR394,sbi-MIR394b,sbi-MIR394a,zma-MIR394b,zma-MIR394a,ata-MIR394,gma-MIR394c,gma-MIR394f,gma-MIR394a,gma-MIR394b,gma-MIR394e,gma-MIR394d,gma-MIR394g,ptc-MIR394b,ptc-MIR394a,ath-MIR394b,ath-MIR394a,mdm-MIR394a,mdm-MIR394b,stu-MIR384,aly-MIR394a,aly-MIR394b,ppe-MIR394b,ppe-MIR394a,mes-MIR394b,mes-MIR394a,mes-MIR394c,vvi-MIR394a,vvi-MIR394c,vvi-MIR394b,nta-MIR394,csi-MIR39…	aof-MIR394	gagaaatcttTTGGCATTCTGTCCACCTCCataacttagccattctcatttcagatgtagaatgataaataaatgaagaacaggaggtggatagtttgccaacagagctct	aof-miR394	TTGGCATTCTGTCCACCTCC	5'	Yes	gp2b	...((((((((((..(((((((..((..(((((..((.(((((((..((((((((((((.......(((...............))).........(((((((((......)))))))))))))))))))))...)))))))..))..)))))..))..)))))))..))))))))))	175	36.5	-68	1	49.5	16.5	40.5	41.5	601	213.5	24	20	11.5	82.5	377	49	18.6262	39.0388	38.7956	187.687	424.073	285.145	16.4389	12.2011	55.9894	45.1255	129.132	55.9389	middle
75	72	aof-miR394_1ss20CA	TTGGCATTCTGTCCACCTCA	20	chr4	-	6372895	6373085	ttttattttgtcaatcatgtgggtttatcaaagagtctcttacacaggttaTTGGCATTCTGTCCACCTCCatactctcatccggtcttcatggattaaaaaattttggaaaatttttgatggaggtgggcatcactgccaaaagacctgtgttggcttctctttgtaaaacccatatgatgatagtttgc	50	aof-MIR394,osa-MIR394,bdi-MIR394,sbi-MIR394b,sbi-MIR394a,zma-MIR394b,zma-MIR394a,ata-MIR394,gma-MIR394f,gma-MIR394a,gma-MIR394c,gma-MIR394g,gma-MIR394b,gma-MIR394e,gma-MIR394d,ptc-MIR394b,ptc-MIR394a,ath-MIR394a,ath-MIR394b,mdm-MIR394a,mdm-MIR394b,stu-MIR384,aly-MIR394a,aly-MIR394b,ppe-MIR394b,ppe-MIR394a,mes-MIR394b,mes-MIR394c,mes-MIR394a,vvi-MIR394a,vvi-MIR394c,vvi-MIR394b,nta-MIR394,csi-MIR39…	aof-MIR394	gagaaatcttTTGGCATTCTGTCCACCTCCataacttagccattctcatttcagatgtagaatgataaataaatgaagaacaggaggtggatagtttgccaacagagctct	aof-miR394	TTGGCATTCTGTCCACCTCC	5'	Diff	gp2b	...((..(((((.(((((((((((((..(((((((...(..(((((((((.((((((...(((((((((((((......(((((.......)))))..((((((((....)))))))).)))))))))))))....))))))..)))))))))..)...)))))))..))))))))))))))))))..)).	187	38.2	-82.9	1.1	0	0	0	0	5.5	0	0	0	0	0	2.5	0	0	0	0	0	3.88087	0	0	0	0	0	0.85631	0	low
76	72	aof-miR394_1ss20CA	TTGGCATTCTGTCCACCTCA	20	chr5	-	8536598	8536778	tcaatcatgtgggtttattaaagagtctcttacataggttaTTGGCATTCTGTCCACCTCCatactctcatctaaaatttgtgcagttgaaattaaaaaaaaaaaataaaaaaaattgatggaggtgggcatctttgccaaaggacctgtgttagcttctctttgtaaaacccatatgatg	50	aof-MIR394,osa-MIR394,bdi-MIR394,sbi-MIR394b,sbi-MIR394a,zma-MIR394b,zma-MIR394a,ata-MIR394,gma-MIR394c,gma-MIR394f,gma-MIR394a,gma-MIR394e,gma-MIR394d,gma-MIR394b,gma-MIR394g,ptc-MIR394b,ptc-MIR394a,ath-MIR394a,ath-MIR394b,mdm-MIR394a,mdm-MIR394b,stu-MIR384,aly-MIR394a,aly-MIR394b,ppe-MIR394b,ppe-MIR394a,mes-MIR394c,mes-MIR394a,mes-MIR394b,vvi-MIR394a,vvi-MIR394c,vvi-MIR394b,nta-MIR394,csi-MIR39…	aof-MIR394	gagaaatcttTTGGCATTCTGTCCACCTCCataacttagccattctcatttcagatgtagaatgataaataaatgaagaacaggaggtggatagtttgccaacagagctct	aof-miR394	TTGGCATTCTGTCCACCTCC	5'	Diff	gp2b	...(((((((((((((..(((((((...((.(((((((((.((((((...((((((((((((.....(((.......(((((....((...........))....)))))......)))))))))))))))....))))))..))))))))).))...)))))))..))))))))))))).	177	34.3	-69.8	1.1	0	0	0	0	5.5	0	0	0	0	0	2.5	0	0	0	0	0	3.88087	0	0	0	0	0	0.85631	0	low
77	73	aof-miR394_R-1	TTGGCATTCTGTCCACCTC	19	chr5	+	279489462	279489638	atcatatgggtttatcaaagggtttcttacagagttccTTGGCATTCTGTCCACCTCcaaactcttccttttctttctttttctaggtttttcttaatttttttttgttggaaaaaaaatggaggtggacatacatgccaacagagttctgttggattctctttgcaaaacccgtgt	50	aof-MIR394,osa-MIR394,bdi-MIR394,sbi-MIR394a,sbi-MIR394b,zma-MIR394a,zma-MIR394b,ata-MIR394,gma-MIR394d,gma-MIR394e,gma-MIR394b,gma-MIR394g,gma-MIR394c,gma-MIR394a,gma-MIR394f,ptc-MIR394a,ptc-MIR394b,ath-MIR394a,ath-MIR394b,mdm-MIR394b,mdm-MIR394a,stu-MIR384,aly-MIR394b,aly-MIR394a,ppe-MIR394a,ppe-MIR394b,mes-MIR394c,mes-MIR394a,mes-MIR394b,vvi-MIR394b,vvi-MIR394c,vvi-MIR394a,nta-MIR394,csi-MIR39…	aof-MIR394	gagaaatcttTTGGCATTCTGTCCACCTCCataacttagccattctcatttcagatgtagaatgataaataaatgaagaacaggaggtggatagtttgccaacagagctct	aof-miR394	TTGGCATTCTGTCCACCTCC	5'	Diff	gp2b	...((((((((((..(((((((..((..(((((..((.(((((((..((((((((((((.......(((...............)))(((((((.(((........))))))))))...))))))))))))...)))))))..))..)))))..))..)))))))..))))))))))	174	36.7	-68	1	0	0	0	0	9.5	0	0	0	0	0	3	0	0	0	0	0	6.70331	0	0	0	0	0	1.02757	0	low
78	73	aof-miR394_R-1	TTGGCATTCTGTCCACCTC	19	unanchor365	+	1052737	1052915	tatgatcatatgggtttatcaaagggtttcttaccgagttcaTTGGCATTCTGTCCACCTCcaaactctttctttcttcttcttcttcttcttcttcttcttcttggaaaaaaatggaggtggacatccttgccaatagagctatgttggattctctttgcaaaacatatgtgatttga	50	aof-MIR394,osa-MIR394,bdi-MIR394,sbi-MIR394a,sbi-MIR394b,zma-MIR394a,zma-MIR394b,ata-MIR394,gma-MIR394g,gma-MIR394b,gma-MIR394e,gma-MIR394d,gma-MIR394f,gma-MIR394a,gma-MIR394c,ptc-MIR394a,ptc-MIR394b,ath-MIR394a,ath-MIR394b,mdm-MIR394b,mdm-MIR394a,stu-MIR384,aly-MIR394b,aly-MIR394a,ppe-MIR394a,ppe-MIR394b,mes-MIR394b,mes-MIR394c,mes-MIR394a,vvi-MIR394c,vvi-MIR394b,vvi-MIR394a,nta-MIR394,csi-MIR39…	aof-MIR394	gagaaatcttTTGGCATTCTGTCCACCTCCataacttagccattctcatttcagatgtagaatgataaataaatgaagaacaggaggtggatagtttgccaacagagctct	aof-miR394	TTGGCATTCTGTCCACCTCC	5'	Diff	gp2b	...((((((((..((((..(((((((..(((.....((((((((((((...((((((((((((.....(((((................................)))))....))))))))))))....))))))).))))).....)))..)))))))..))))..))))))))...	173	37.4	-60.531	0.9	0	0	0	0	9.5	0	0	0	0	0	3	0	0	0	0	0	6.70331	0	0	0	0	0	1.02757	0	low
79	74	zma-miR395l-5p_R-2_1ss20CG	GTTCCTTCCAAACACTTCAG	20	chr10	+	123601722	123601831	actggctgcttcctagtGTTCCTTCCAAACACTTCAGtagtagtttattacaaaggaattgaatctaacccttaacTCCTGAAGTGTTTGGGGGAACtctgggcaccacc	9	bdi-MIR395d,zma-MIR395l,gma-MIR395i,mdm-MIR395b,stu-MIR395h,stu-MIR395i,mes-MIR395c,lus-MIR395d,cme-MIR395f,	zma-MIR395l	aGTTCCTTCCAAACACTTCACCAgctaggccatgcacaagatgaacccacattaggctaGTGAAGTGTTTGGAGGAACTCt	zma-miR395l-5p	GTTCCTTCCAAACACTTCACCA	5'	Diff	gp2b	..(((.(((...((((.(((((.((((((((((((((.(((.((.....)).((((.............)))).))).))))))))))))))))))).))))))))))..	106	44.5	-42.8	0.9	8	12.5	3	0	0	0	0	0	0	0	0	0	3.01029	29.5748	2.87375	0	0	0	0	0	0	0	0	0	middle
79	75	stu-MIR395h-p3_1ss6AC	TCCTGCAGTGTTTGGGGGAAC	21	chr10	+	123601722	123601831	actggctgcttcctagtGTTCCTTCCAAACACTTCAGtagtagtttattacaaaggaattgaatctaacccttaacTCCTGAAGTGTTTGGGGGAACtctgggcaccacc	9	bdi-MIR395d,zma-MIR395l,gma-MIR395i,mdm-MIR395b,stu-MIR395h,stu-MIR395i,mes-MIR395c,lus-MIR395d,cme-MIR395f,	stu-MIR395h	gttcccttgaccacttcatgatggtttaataacttcattttttgtgccctcCTGAAGTGTTTGGGGGAACTC	stu-MIR395h-p3	tcCTGAAGTGTTTGGGGGAAC	3'	New	gp2b	..(((.(((...((((.(((((.((((((((((((((.(((.((.....)).((((.............)))).))).))))))))))))))))))).))))))))))..	106	44.5	-42.8	0.9	6	2.5	0	0	0	0	0	0	0	0	0	0	2.25772	5.91497	0	0	0	0	0	0	0	0	0	0	low
80	76	gma-MIR395i-p3_1ss14TA_1	TTGGGGGAACTCTAGGGCTC	20	chr1	+	91680023	91680127	gaacccccgaattgatctaattaaatcaagaaaaaaagagagcatacatttaatctgattaaatcctaattaattactgaactgtTTGGGGGAACTCTAGGGCTC	2	gma-MIR395i,lus-MIR395d,	gma-MIR395i	ctgttggctgtctcctgcagttcctctgaacgcttcatgtgaggggctagcaagtgtatacgttataatttagccttcttcaATGAAGTGTTTGGGGGAACTCttgggctcaacca	gma-MIR395i-p3	TTGGGGGAACTCttgggctc	3'	New	gp2b	...((((((((((((((..(((((((.....................)))))))..)))))......................))))))))).............	89	34.3	-16.6	0.5	212	19	28	0	0	0	0	6	0	0	0	0	79.7727	44.9537	26.8216	0	0	0	0	3.66032	0	0	0	0	middle
81	76	gma-MIR395i-p3_1ss14TA_1	TTGGGGGAACTCTAGGGCTC	20	chr5	+	272846966	272847076	taggtgaagccccgaattgatctaattaaataaaaaaaaagagcatacatttaatctgattaaatcctaattaattactgaactatTTGGGGGAACTCTAGGGCTCacaca	2	gma-MIR395i,lus-MIR395d,	gma-MIR395i	ctgttggctgtctcctgcagttcctctgaacgcttcatgtgaggggctagcaagtgtatacgttataatttagccttcttcaATGAAGTGTTTGGGGGAACTCttgggctcaacca	gma-MIR395i-p3	TTGGGGGAACTCttgggctc	3'	New	gp2b	...(((.(((((.((.((((((..(((((((.................)))))))..)))))).))......................(((....)))..))))))))...	105	32.4	-23.1	0.6	212	19	28	0	0	0	0	6	0	0	0	0	79.7727	44.9537	26.8216	0	0	0	0	3.66032	0	0	0	0	middle
82	77	ata-MIR395d-p5_2ss13TA18AT	TCTCAGGGCTCAAGTGAT	18	chr10	+	74885095	74885137	aatgTCTCAGGGCTCAAGTGATtcaccgaagcgatgagacctt	1	ata-MIR395d,	ata-MIR395d	gtattactgggAGTTCCCTTCAAGCACTTTACGaactacttttttaaggtattatgtgaagtgtttggggaactcttggtgcaactaagcacttaaaagatattgcaagtcataaaccacacgagatgtactgcaaatcccgtttggtatcactgggaattcctttcaaacactttacggatcacctttctcagggctcatgTGAAGTGTTTGGGGGAACTCtcggtgtaac	ata-MIR395d-p5	tctcagggctcatgTGAA	5'	New	gp2b	...((((((..(((...(((...)))...)))..))))))...	37	48.8	-12.9	0.6	0	0	0	0	0	0	0	0	0	0	0	5.5	0	0	0	0	0	0	0	0	0	0	0	6.27885	low
83	77	ata-MIR395d-p5_2ss13TA18AT	TCTCAGGGCTCAAGTGAT	18	chr6	+	75132242	75132272	TCTCAGGGCTCAAGTGATtcaccgaagcgac	1	ata-MIR395d,	ata-MIR395d	gtattactgggAGTTCCCTTCAAGCACTTTACGaactacttttttaaggtattatgtgaagtgtttggggaactcttggtgcaactaagcacttaaaagatattgcaagtcataaaccacacgagatgtactgcaaatcccgtttggtatcactgggaattcctttcaaacactttacggatcacctttctcagggctcatgTGAAGTGTTTGGGGGAACTCtcggtgtaac	ata-MIR395d-p5	tctcagggctcatgTGAA	5'	New	gp2b	.......(((...(((...)))...)))...	21	54.8	-3.1	0.2	0	0	0	0	0	0	0	0	0	0	0	5.5	0	0	0	0	0	0	0	0	0	0	0	6.27885	low
84	78	aof-miR395a_R-2	TGAAGTGTTTGGGGGAACT	19	chr10	+	123469108	123469308	gttccttccaaacacttcagtagtagtttattacaaaggaattgaatctaacccttaactccTGAAGTGTTTGGGGGAACTctgggcaccacccagtatcagctagttgtctgctgctgctacaatattttgatcagtattattttattacacgggtaattgtttatttgatttggtttatttctgcttccacataaataa	191	aof-MIR395a,osa-MIR395k,osa-MIR395h,osa-MIR395m,osa-MIR395n,osa-MIR395j,osa-MIR395y,osa-MIR395q,osa-MIR395i,osa-MIR395g,osa-MIR395r,osa-MIR395b,osa-MIR395p,osa-MIR395e,osa-MIR395l,osa-MIR395s,osa-MIR395d,bdi-MIR395o,bdi-MIR395k,bdi-MIR395a,bdi-MIR395f,bdi-MIR395q,bdi-MIR395l,bdi-MIR395m,bdi-MIR395e,bdi-MIR395n,bdi-MIR395g,bdi-MIR395h,bdi-MIR395c,bdi-MIR395j,bdi-MIR395b,bdi-MIR395d,sbi-MIR395e,sbi…	aof-MIR395a	tgttgcttatccccgggagttccctcaaacactttgttatataactcaatctctctgatacaagggaggtagtattctacTGAAGTGTTTGGGGGAACTCTggatggtaat	aof-miR395a	TGAAGTGTTTGGGGGAACTCT	5'	Diff	gp2b	(((((.((((((((((((((.(((.((.....)).((((.............)))).))).)))))))))))))))))))..........((((.(((.((((.(((.....))))))).))).............(((.........)))..))))..((((((((.((....(((........)))..)).))))))))	80	36.3	-52.6	0.7	2017	1085.5	500	0	0	0	3	22.5	2.5	0	9	0	758.97	2568.28	478.958	0	0	0	2.05486	13.7262	12.1716	0	3.08272	0	high
85	78	aof-miR395a_R-2	TGAAGTGTTTGGGGGAACT	19	chr10	+	123698650	123698850	gttccttccaaacacttcagtagtagtttattacaaaggaattgaatctaacccttaactccTGAAGTGTTTGGGGGAACTctgggcaccacccagtatcagctagttgtctgctgctgctacaatattttgatcagtattattttattacacgggtaattgtttatttgatttggtttatttctgcttccacataaataa	191	aof-MIR395a,osa-MIR395i,osa-MIR395q,osa-MIR395b,osa-MIR395r,osa-MIR395g,osa-MIR395y,osa-MIR395d,osa-MIR395s,osa-MIR395l,osa-MIR395e,osa-MIR395p,osa-MIR395k,osa-MIR395m,osa-MIR395h,osa-MIR395j,osa-MIR395n,bdi-MIR395h,bdi-MIR395g,bdi-MIR395b,bdi-MIR395j,bdi-MIR395c,bdi-MIR395k,bdi-MIR395o,bdi-MIR395l,bdi-MIR395e,bdi-MIR395n,bdi-MIR395m,bdi-MIR395a,bdi-MIR395q,bdi-MIR395f,bdi-MIR395d,sbi-MIR395j,sbi…	aof-MIR395a	tgttgcttatccccgggagttccctcaaacactttgttatataactcaatctctctgatacaagggaggtagtattctacTGAAGTGTTTGGGGGAACTCTggatggtaat	aof-miR395a	TGAAGTGTTTGGGGGAACTCT	5'	Diff	gp2b	(((((.((((((((((((((.(((.((.....)).((((.............)))).))).)))))))))))))))))))..........((((.(((.((((.(((.....))))))).))).............(((.........)))..))))..((((((((.((....(((........)))..)).))))))))	80	36.3	-52.6	0.7	2017	1085.5	500	0	0	0	3	22.5	2.5	0	9	0	758.97	2568.28	478.958	0	0	0	2.05486	13.7262	12.1716	0	3.08272	0	high
86	79	osa-miR395x_L-1R+1_1ss16TA	TGAAGTGTTTGGAGAAGCTCC	21	chr10	+	123473806	123473911	ttccacctagagctcctctcaatcccttcaggagcctaagcctatactaagccgcgtaatgtggctggctttagtacTGAAGTGTTTGGAGAAGCTCCatgtgatc	4	osa-MIR395x,osa-MIR395t,aly-MIR395i,cca-MIR395c,	osa-MIR395x	atttggtatcgccatgagttctcttcaaactcttcatacgacactaattcaagtgatgttGTGAAGTGTTTGGAGTAGCTCttggtgtcaccaaac	osa-miR395x	GTGAAGTGTTTGGAGTAGCTC	3'	Diff	gp2b	...(((...(((((.(((.(((...((((((..((..(((((.......((((((.....)))))))))))..)).))))))...)))))).)))))...)))...	100	49.1	-39.7	0.8	39.5	19.5	4.5	0	0	0	0	0	0	4	4.5	19	14.8633	46.1367	4.31062	0	0	0	0	0	0	2.1879	1.54136	21.6906	middle
87	79	osa-miR395x_L-1R+1_1ss16TA	TGAAGTGTTTGGAGAAGCTCC	21	chr10	+	123611734	123611839	ttccacctagagctcctctcaatcccttcaggagcctaagcctatattaagccgcgtaatgtggctggctttagtacTGAAGTGTTTGGAGAAGCTCCatgtgatc	4	osa-MIR395x,osa-MIR395t,aly-MIR395i,cca-MIR395c,	osa-MIR395x	atttggtatcgccatgagttctcttcaaactcttcatacgacactaattcaagtgatgttGTGAAGTGTTTGGAGTAGCTCttggtgtcaccaaac	osa-miR395x	GTGAAGTGTTTGGAGTAGCTC	3'	Diff	gp2b	...(((...(((((.(((.(((...((((((..((..(((((.......((((((.....)))))))))))..)).))))))...)))))).)))))...)))...	100	48.1	-39.7	0.8	39.5	19.5	4.5	0	0	0	0	0	0	4	4.5	19	14.8633	46.1367	4.31062	0	0	0	0	0	0	2.1879	1.54136	21.6906	middle
88	80	gma-MIR395i-p3_1ss15TA	TTTGGGGGAACTCTAGGGCTC	21	chr11	+	6118276	6118424	tatgggtacatgtaaatcagattaaacttgctgaatcctggagttcctcccaaccacttcaatagtttttgtattgaagaaagcactgaagtgTTTGGGGGAACTCTAGGGCTCacacagtccttctctcttctttaccctgaccctaa	27	gma-MIR395i,ptc-MIR395k,ptc-MIR395e,ptc-MIR395f,ptc-MIR395b,ath-MIR395a,ath-MIR395d,mdm-MIR395b,aly-MIR395d,ppe-MIR395m,ppe-MIR395e,ppe-MIR395d,mes-MIR395b,mes-MIR395c,vvi-MIR395f,csi-MIR395a,lus-MIR395d,bra-MIR395c,bra-MIR395a,bra-MIR395b,bna-MIR395a,bna-MIR395b,cas-MIR395d,cas-MIR395a,cpa-MIR395b,cpa-MIR395a,rco-MIR395d,	gma-MIR395i	ctgttggctgtctcctgcagttcctctgaacgcttcatgtgaggggctagcaagtgtatacgttataatttagccttcttcaATGAAGTGTTTGGGGGAACTCttgggctcaacca	gma-MIR395i-p3	TTTGGGGGAACTCttgggctc	3'	New	gp2b	...((((....(((((..(((....(((((.(((..(((((((((((.(((((.(((((((...((((((........))))))..))))))).))))))))))))))))..))))).))).......)))..)))))....))))...	143	42.3	-57.1	0.9	27	0	0	0	0	0	0	0	0	0	0	0	10.1597	0	0	0	0	0	0	0	0	0	0	0	middle
89	80	gma-MIR395i-p3_1ss15TA	TTTGGGGGAACTCTAGGGCTC	21	unanchor361	+	574409	574511	gaacccccgatttgatctgattaaatcaagaaaaaaagagcatacatttaatctgattaaatcctaattaattactgaagtgTTTGGGGGAACTCTAGGGCTC	108	aof-MIR395a,tae-MIR395b,ata-MIR395a,ata-MIR395f,gma-MIR395b,gma-MIR395a,gma-MIR395c,gma-MIR395i,ptc-MIR395d,ptc-MIR395k,ptc-MIR395i,ptc-MIR395e,ptc-MIR395f,ptc-MIR395c,ptc-MIR395b,ptc-MIR395g,ptc-MIR395h,ptc-MIR395j,ath-MIR395a,ath-MIR395e,ath-MIR395d,mdm-MIR395a,mdm-MIR395g,mdm-MIR395b,mdm-MIR395h,mdm-MIR395d,mdm-MIR395c,mdm-MIR395e,mdm-MIR395f,mdm-MIR395i,stu-MIR395g,stu-MIR395c,stu-MIR395a,stu…	gma-MIR395i	ctgttggctgtctcctgcagttcctctgaacgcttcatgtgaggggctagcaagtgtatacgttataatttagccttcttcaATGAAGTGTTTGGGGGAACTCttgggctcaacca	gma-MIR395i-p3	TTTGGGGGAACTCttgggctc	3'	New	gp2b	...((((((((((((((.((((((((...................)))))))).))))))))).........(((....)))...))))).............	87	35	-22.3	0.6	27	0	0	0	0	0	0	0	0	0	0	0	10.1597	0	0	0	0	0	0	0	0	0	0	0	middle
90	81	aof-miR395a_R-3	TGAAGTGTTTGGGGGAAC	18	chr2	+	40516321	40516367	TGAAGTGTTTGGGGGAACcctagggctcacacaatccttccctcttc	189	aof-MIR395a,osa-MIR395y,osa-MIR395g,osa-MIR395b,osa-MIR395r,osa-MIR395i,osa-MIR395q,osa-MIR395l,osa-MIR395e,osa-MIR395p,osa-MIR395s,osa-MIR395d,osa-MIR395m,osa-MIR395h,osa-MIR395k,osa-MIR395n,osa-MIR395j,bdi-MIR395h,bdi-MIR395g,bdi-MIR395b,bdi-MIR395c,bdi-MIR395j,bdi-MIR395o,bdi-MIR395k,bdi-MIR395q,bdi-MIR395f,bdi-MIR395a,bdi-MIR395m,bdi-MIR395e,bdi-MIR395n,bdi-MIR395l,sbi-MIR395j,sbi-MIR395a,sbi…	aof-MIR395a	tgttgcttatccccgggagttccctcaaacactttgttatataactcaatctctctgatacaagggaggtagtattctacTGAAGTGTTTGGGGGAACTCTggatggtaat	aof-miR395a	TGAAGTGTTTGGGGGAACTCT	5'	Diff	gp2b	..........((((((.....((((.........))))))))))...	34	53.2	-11.6	0.5	354	139.5	53	0	0	0	2.5	4	0	0	0	0	133.205	330.055	50.7695	0	0	0	1.71239	2.44021	0	0	0	0	middle
91	82	aof-miR395a_L+1R-1	CTGAAGTGTTTGGGGGAACTC	21	chr2	+	204481416	204481472	CTGAAGTGTTTGGGGGAACTCtagggctcacacagtccttccctcttattaactcta	109	aof-MIR395a,osa-MIR395h,osa-MIR395j,tae-MIR395b,ata-MIR395f,ata-MIR395a,gma-MIR395b,gma-MIR395c,gma-MIR395a,ptc-MIR395b,ptc-MIR395g,ptc-MIR395h,ptc-MIR395j,ptc-MIR395d,ptc-MIR395k,ptc-MIR395e,ptc-MIR395f,ptc-MIR395i,ptc-MIR395c,ath-MIR395e,ath-MIR395d,ath-MIR395a,mdm-MIR395c,mdm-MIR395e,mdm-MIR395f,mdm-MIR395i,mdm-MIR395g,mdm-MIR395a,mdm-MIR395d,mdm-MIR395h,mdm-MIR395b,stu-MIR395h,stu-MIR395i,stu…	aof-MIR395a	tgttgcttatccccgggagttccctcaaacactttgttatataactcaatctctctgatacaagggaggtagtattctacTGAAGTGTTTGGGGGAACTCTggatggtaat	aof-miR395a	TGAAGTGTTTGGGGGAACTCT	5'	Diff	gp2b	....(((....((((((.....((((((.....))))))))))))......)))...	50	47.4	-15.7	0.6	12.5	3	2.5	0	0	0	0	0	0	0	0	0	4.70358	7.09796	2.39479	0	0	0	0	0	0	0	0	0	low
92	83	gma-MIR395i-p3_1ss14TG	TTGGGGGAACTCTGGGGCTC	20	chr2	-	162130850	162130982	aaatgtgcaaattttttaggacaacatattcaaccgaattgatctaattaaatcaagaaaaaagagcatacatttaatctgattaaatcctaattaattactgaactgtTTGGGGGAACTCTGGGGCTCacac	1	gma-MIR395i,	gma-MIR395i	ctgttggctgtctcctgcagttcctctgaacgcttcatgtgaggggctagcaagtgtatacgttataatttagccttcttcaATGAAGTGTTTGGGGGAACTCttgggctcaacca	gma-MIR395i-p3	TTGGGGGAACTCttgggctc	3'	New	gp2b	...((.((.((((..((((((......((((....))))(((((..(((((((..................)))))))..)))))..))))))..))))............(((....)))....)).))...	127	31.6	-18.5	0.4	44.5	2.5	2.5	0	0	0	0	0	0	0	0	0	16.7447	5.91497	2.39479	0	0	0	0	0	0	0	0	0	middle
93	83	gma-MIR395i-p3_1ss14TG	TTGGGGGAACTCTGGGGCTC	20	chr2	-	404333542	404333644	gaacccccgatttgatctgattaaatcaagaaaaaaaaacatacatttaatctgatttaatcctaattaattactaaagtgtTTGGGGGAACTCTAGGGCTCa	1	gma-MIR395i,	gma-MIR395i	ctgttggctgtctcctgcagttcctctgaacgcttcatgtgaggggctagcaagtgtatacgttataatttagccttcttcaATGAAGTGTTTGGGGGAACTCttgggctcaacca	gma-MIR395i-p3	TTGGGGGAACTCttgggctc	3'	New	gp2b	...(((((((.(((((..((((((((((.((...................))))))))))))...))))).(((....))).)))))))..............	86	32	-20.2	0.6	44.5	2.5	2.5	0	0	0	0	0	0	0	0	0	16.7447	5.91497	2.39479	0	0	0	0	0	0	0	0	0	middle
94	84	aof-miR395a_R-1	TGAAGTGTTTGGGGGAACTC	20	chr3	+	250844089	250844125	TGAAGTGTTTGGGGGAACTCtttggagctctcagttg	189	aof-MIR395a,osa-MIR395k,osa-MIR395m,osa-MIR395h,osa-MIR395j,osa-MIR395n,osa-MIR395i,osa-MIR395q,osa-MIR395r,osa-MIR395b,osa-MIR395g,osa-MIR395y,osa-MIR395d,osa-MIR395s,osa-MIR395l,osa-MIR395p,osa-MIR395e,bdi-MIR395k,bdi-MIR395o,bdi-MIR395l,bdi-MIR395e,bdi-MIR395n,bdi-MIR395m,bdi-MIR395a,bdi-MIR395f,bdi-MIR395q,bdi-MIR395g,bdi-MIR395h,bdi-MIR395b,bdi-MIR395c,bdi-MIR395j,sbi-MIR395d,sbi-MIR395g,sbi…	aof-MIR395a	tgttgcttatccccgggagttccctcaaacactttgttatataactcaatctctctgatacaagggaggtagtattctacTGAAGTGTTTGGGGGAACTCTggatggtaat	aof-miR395a	TGAAGTGTTTGGGGGAACTCT	5'	Diff	gp2b	........(((((((..(((....))))))))))...	26	48.6	-8.1	0.5	2658.5	758	489	0	0	0	5	37	0	5.5	31.5	0	1000.36	1793.42	468.421	0	0	0	3.42477	22.572	0	3.00836	10.7895	0	high
95	84	aof-miR395a_R-1	TGAAGTGTTTGGGGGAACTC	20	chr6	+	160055277	160055408	agagtgtgcatttaatttaggtgaacccccgatttgatctgattaaatcaagaaaaaaagagcatacatttaatctgattatatcctaattaattacTGAAGTGTTTGGGGGAACTCtaaggctcacacagt	183	aof-MIR395a,osa-MIR395j,osa-MIR395n,osa-MIR395k,osa-MIR395m,osa-MIR395h,osa-MIR395d,osa-MIR395s,osa-MIR395l,osa-MIR395p,osa-MIR395e,osa-MIR395i,osa-MIR395q,osa-MIR395b,osa-MIR395r,osa-MIR395g,osa-MIR395y,bdi-MIR395l,bdi-MIR395n,bdi-MIR395e,bdi-MIR395m,bdi-MIR395a,bdi-MIR395f,bdi-MIR395q,bdi-MIR395k,bdi-MIR395o,bdi-MIR395b,bdi-MIR395c,bdi-MIR395j,bdi-MIR395g,bdi-MIR395h,sbi-MIR395f,sbi-MIR395d,sbi…	aof-MIR395a	tgttgcttatccccgggagttccctcaaacactttgttatataactcaatctctctgatacaagggaggtagtattctacTGAAGTGTTTGGGGGAACTCTggatggtaat	aof-miR395a	TGAAGTGTTTGGGGGAACTCT	3'	Diff	gp2b	...(((((.......(((((((...(((((((..(((((.((((((((...................)))))))).))))).............(((....))).))))))).)).)))))...)))))...	126	34.1	-27.6	0.6	2658.5	758	489	0	0	0	5	37	0	5.5	31.5	0	1000.36	1793.42	468.421	0	0	0	3.42477	22.572	0	3.00836	10.7895	0	high
96	85	gma-MIR395i-p3_2ss14TA20CT	TTGGGGGAACTCTAGGGCTT	20	chr4	-	238645041	238645104	ctactggctctgagatagcttggttgtccccTTGGGGGAACTCTAGGGTTTccagagagaggac	3	gma-MIR395i,gma-MIR395i,lus-MIR395d,	gma-MIR395i	ctgttggctgtctcctgcagttcctctgaacgcttcatgtgaggggctagcaagtgtatacgttataatttagccttcttcaATGAAGTGTTTGGGGGAACTCttgggctcaacca	gma-MIR395i-p3	TTGGGGGAACTCttgggctc	3'	New	gp2b	...((..(((((.((...(((((...(((((...)))))...)))))...)))))))..))...	58	54.7	-23.7	0.7	13	0	0	0	0	0	0	0	0	0	0	0	4.89172	0	0	0	0	0	0	0	0	0	0	0	low
97	86	gma-MIR395i-p5_2ss14TA20CT	TTGGGGGAACTCTAGGGCTT	20	chr6	-	194576985	194577124	TTGGGGGAACTCTAGGGCTTacacagtccttccctcttattaactctagggcacataacattcaaacaaattaatatactaatcacaatcgctgaagttacctgggcatcgacagaggggaggcagtggcaagggagaca	2	gma-MIR395i,lus-MIR395d,	gma-MIR395i	ctgttggctgtctcctgcagttcctctgaacgcttcatgtgaggggctagcaagtgtatacgttataatttagccttcttcaATGAAGTGTTTGGGGGAACTCttgggctcaacca	gma-MIR395i-p5	TTGGGGGAACTCttgggctc	5'	New	gp2b	.........((((...((...(((.(.((((((((((.......((((((.....((((.((((............................)))))))))))))).......))))))))))).)))))...))))...	128	45.7	-33.8	0.5	13	0	0	0	0	0	0	0	0	0	0	0	4.89172	0	0	0	0	0	0	0	0	0	0	0	low
98	87	mdm-miR395l_L-1R-1	TGAAGTGTTTGGGGGAACC	19	chr7	+	88920453	88920497	aaTGAAGTGTTTGGGGGAACCctagggctcacacaatccttccct	1	mdm-MIR395l,	mdm-MIR395l	ataacatcagacggcccctagtgttccctcaaacacctcattggaaattaatagggagtcctaagtaatccatctctctctctctccctctctttaCTGAAGTGTTTGGGGGAACCCctggagccatttgatccat	mdm-miR395l	CTGAAGTGTTTGGGGGAACCC	5'	Diff	gp2b	...((((...(((...((.((....)).))...)))..))))...	39	51.1	-9	0.4	4.5	2.5	0	0	0	0	0	0	0	0	0	0	1.69329	5.91497	0	0	0	0	0	0	0	0	0	0	low
99	88	osa-miR395b_L+1R-1_1ss2GC	TCTGAAGTGTTTGGGGGAACT	21	chr8	+	135327134	135327224	agtgttccttccaagcacttcagtagtttactactggggtattgaatctaacccttaactTCTGAAGTGTTTGGGGGAACTctgggcacca	6	osa-MIR395i,ata-MIR395a,ata-MIR395f,ppe-MIR395j,csi-MIR395a,lus-MIR395a,	osa-MIR395i	gttttaccgggagttctcttcaagcacttcacgtagagctttctattgacatggagctttagaacaatGTGAAGTGTTTGGGGGAACTCttggtaccaa	osa-miR395b	GTGAAGTGTTTGGGGGAACTC	3'	Diff	gp2b	((.(((((.((((((((((((((.((((......((((........))))......)))).))))))))))))))))))).))........	83	45.1	-37.3	0.9	69	14	13	0	0	0	0	0	0	0	0	0	25.9638	33.1238	12.4529	0	0	0	0	0	0	0	0	0	middle
100	89	aof-miR395a_L+2R-2	TCTGAAGTGTTTGGGGGAACT	21	unanchor713	-	1196200	1196259	gagcatacattttatttgattaaatcctaattaattACTGAAGTGTTTGGGGGAACTcta	188	aof-MIR395a,osa-MIR395b,osa-MIR395i,osa-MIR395k,osa-MIR395l,osa-MIR395e,osa-MIR395p,osa-MIR395d,osa-MIR395s,osa-MIR395y,osa-MIR395r,osa-MIR395g,osa-MIR395q,osa-MIR395j,osa-MIR395n,osa-MIR395m,osa-MIR395h,bdi-MIR395b,bdi-MIR395j,bdi-MIR395c,bdi-MIR395h,bdi-MIR395g,bdi-MIR395q,bdi-MIR395n,bdi-MIR395m,bdi-MIR395l,bdi-MIR395o,bdi-MIR395k,bdi-MIR395f,bdi-MIR395a,bdi-MIR395e,sbi-MIR395c,sbi-MIR395b,sbi…	aof-MIR395a	tgttgcttatccccgggagttccctcaaacactttgttatataactcaatctctctgatacaagggaggtagtattctacTGAAGTGTTTGGGGGAACTCTggatggtaat	aof-miR395a	TGAAGTGTTTGGGGGAACTCT	3'	Diff	gp2b	......((((((((..(((((((.......))))))).))))))))..(((....)))..	40	30	-9.8	0.5	69	14	13	0	0	0	0	0	0	0	0	0	25.9638	33.1238	12.4529	0	0	0	0	0	0	0	0	0	middle
101	90	aof-miR396a_1ss2TA	TACCACGGCTTTCTTGAACTG	21	chr1	-	426603500	426603536	TACCACGGCTTTATTGAACTGcaattctgaagccctt	6	aof-MIR396a,mtr-MIR396c,ptc-MIR396f,mdm-MIR396g,mdm-MIR396f,cme-MIR396e,	aof-MIR396a	ggaagtcaagattatggatatgttcTTCCACGGCTTTCTTGAACTGtgtactcaattcttatttcttttcatttttctctttttgaatagtttggaaaaagaaaaaaaaataggataaaaaaaaggatgacggaaaaaagaaaagaataatttgggaaaagatggagaaggtcatagttcaagaaagacgtgggaaaacatggcatgtctttttgtctcgtc	aof-miR396a	TTCCACGGCTTTCTTGAACTG	5'	Diff	gp2b	......(((((((..(((......))))))))))...	28	43.2	-7.8	0.5	4.5	3	0	0	0	0	0	0	0	2.5	0	0	1.69329	7.09796	0	0	0	0	0	0	0	1.36744	0	0	low
102	91	aof-MIR396b-p5_2ss21GT22AT	TATTTTTCCACAGCTTTCTTTT	22	chr3	+	3866742	3866775	TATTTTTCCAAAGCTTTCTTTTtgctagggacaa	6	aof-MIR396b,aly-MIR396b,nta-MIR396a,csi-MIR396b,bra-MIR396,dpr-MIR396,	aof-MIR396b	ttcataaatggttctctttgtatttTTCCACAGCTTTCTTGAACTGcatagaaaagggcttcaattgccgaaggctgccaattttgcggttcaataaagctgtgggaaattacagagggagactaaattgaccg	aof-MIR396b-p5	tatttTTCCACAGCTTTCTTGA	5'	New	gp2b	......(((..(((.........)))..)))...	25	32.4	-6	0.5	0	0	0	0	0	0	0	0	0	2.5	2.5	4	0	0	0	0	0	0	0	0	0	1.36744	0.85631	4.56644	low
103	91	aof-MIR396b-p5_2ss21GT22AT	TATTTTTCCACAGCTTTCTTTT	22	unanchor258	+	48046	48096	ttgtattTATTTTTCCAAAGCTTTCTTTTtgctggggacaaatttgtgatc	6	aof-MIR396b,aly-MIR396b,nta-MIR396a,csi-MIR396b,bra-MIR396,dpr-MIR396,	aof-MIR396b	ttcataaatggttctctttgtatttTTCCACAGCTTTCTTGAACTGcatagaaaagggcttcaattgccgaaggctgccaattttgcggttcaataaagctgtgggaaattacagagggagactaaattgaccg	aof-MIR396b-p5	tatttTTCCACAGCTTTCTTGA	5'	New	gp2b	...(((..((((.(((..(((.........)))..))).))))..)))...	45	31.4	-9.6	0.6	0	0	0	0	0	0	0	0	0	2.5	2.5	4	0	0	0	0	0	0	0	0	0	1.36744	0.85631	4.56644	low
104	92	aof-miR396a	TTCCACGGCTTTCTTGAACTG	21	chr4	+	155861818	155861947	catgagggagagagagagatctgagagaatgctgaaatcaatcaagattatgggatatgtttTTCCACGGCTTTCTTGAACTGtggactcggcgtctgttctccatgagtttttttttttttttttcttt	42	aof-MIR396a,aof-MIR396b,osa-MIR396e,osa-MIR396f,bdi-MIR396a,bdi-MIR396b,sbi-MIR396e,sbi-MIR396d,zma-MIR396c,zma-MIR396d,tae-MIR396,ata-MIR396d,far-MIR396,mtr-MIR396c,ptc-MIR396f,ptc-MIR396g,ptc-MIR396c,ath-MIR396b,mdm-MIR396g,mdm-MIR396f,aly-MIR396b,mes-MIR396d,mes-MIR396e,vvi-MIR396c,vvi-MIR396a,nta-MIR396a,csi-MIR396e,csi-MIR396b,csi-MIR396c,lus-MIR396b,lus-MIR396e,cme-MIR396e,cme-MIR396c,cme-M…	aof-MIR396a	ggaagtcaagattatggatatgttcTTCCACGGCTTTCTTGAACTGtgtactcaattcttatttcttttcatttttctctttttgaatagtttggaaaaagaaaaaaaaataggataaaaaaaaggatgacggaaaaaagaaaagaataatttgggaaaagatggagaaggtcatagttcaagaaagacgtgggaaaacatggcatgtctttttgtctcgtc	aof-miR396a	TTCCACGGCTTTCTTGAACTG	3'	Yes	gp2b	...((..((((((((((((((((.(((((((((((..(((.((((((...(((((........))).))....))))))....)))..)))))....)))))))).))...))))))))))))..))...	124	38.5	-34.4	0.7	6745	1501	1318.5	292	3076	1518.5	3025	2566	441.5	3805	3070.5	554	2538.05	3551.35	1263.01	1320.6	2170.46	2028.07	2071.99	1565.4	2149.51	2081.24	1051.72	632.452	high
105	92	aof-miR396a	TTCCACGGCTTTCTTGAACTG	21	chr5	-	155371019	155371071	aaatcaagatggtggatatgtttTTCCACGGCTTTCTTGAACTGtggactcag	63	aof-MIR396a,aof-MIR396b,osa-MIR396e,osa-MIR396f,bdi-MIR396b,bdi-MIR396a,sbi-MIR396d,sbi-MIR396e,zma-MIR396c,zma-MIR396d,tae-MIR396,ata-MIR396d,far-MIR396,mtr-MIR396c,ptc-MIR396f,ptc-MIR396g,ptc-MIR396c,ath-MIR396b,ath-MIR396b,mdm-MIR396g,mdm-MIR396f,stu-MIR396,aly-MIR396b,aly-MIR396b,mes-MIR396e,mes-MIR396d,mes-MIR396f,mes-MIR396f,mes-MIR396c,mes-MIR396c,vvi-MIR396c,vvi-MIR396a,vvi-MIR396b,vvi-MI…	aof-MIR396a	ggaagtcaagattatggatatgttcTTCCACGGCTTTCTTGAACTGtgtactcaattcttatttcttttcatttttctctttttgaatagtttggaaaaagaaaaaaaaataggataaaaaaaaggatgacggaaaaaagaaaagaataatttgggaaaagatggagaaggtcatagttcaagaaagacgtgggaaaacatggcatgtctttttgtctcgtc	aof-miR396a	TTCCACGGCTTTCTTGAACTG	3'	Yes	gp2b	...((((((..(((((........))))).....)))))).(((......)))	37	41.5	-12.3	0.6	6745	1501	1318.5	292	3076	1518.5	3025	2566	441.5	3805	3070.5	554	2538.05	3551.35	1263.01	1320.6	2170.46	2028.07	2071.99	1565.4	2149.51	2081.24	1051.72	632.452	high
106	93	aof-miR396b_R-2_1ss19CT	TTCCACAGCTTTCTTGAAT	19	chr5	-	275644798	275644924	tcggcagtggtcaacaccggttcggcctttgcaaacttcggtacatcctccttccaccgagtccggaaatccaatgtcgagggcccctttatcagaaaaaacttccccTTCCACAGCTTTATTGAAT	91	aof-MIR396b,osa-MIR396b,osa-MIR396a,osa-MIR396c,bdi-MIR396e,bdi-MIR396c,bdi-MIR396d,sbi-MIR396b,sbi-MIR396a,sbi-MIR396c,zma-MIR396b,zma-MIR396a,zma-MIR396e,zma-MIR396f,ata-MIR396c,ata-MIR396e,vca-MIR396,sof-MIR396,ssp-MIR396,mtr-MIR396a,mtr-MIR396b,gma-MIR396i,gma-MIR396f,gma-MIR396e,gma-MIR396d,gma-MIR396a,gma-MIR396k,gma-MIR396h,gma-MIR396b,gma-MIR396c,gma-MIR396g,ptc-MIR396c,ptc-MIR396e,ptc-MI…	aof-MIR396b	ttcataaatggttctctttgtatttTTCCACAGCTTTCTTGAACTGcatagaaaagggcttcaattgccgaaggctgccaattttgcggttcaataaagctgtgggaaattacagagggagactaaattgaccg	aof-miR396b	TTCCACAGCTTTCTTGAACTG	3'	Diff	gp2b	..(((.((((........((...((((((((((...((((((.............))))))...((....))..)).)))))))))).......(((.....))).....)))).))).........	116	50.4	-27.9	0.4	0	0	0	0	4	0	0	0	0	0	0	3	0	0	0	0	2.82245	0	0	0	0	0	0	3.42483	low
107	93	aof-miR396b_R-2_1ss19CT	TTCCACAGCTTTCTTGAAT	19	unanchor624	-	741532	741576	gaaagaacttctccTTCCACAGCTTTATTGAATcaggattctcta	91	aof-MIR396b,osa-MIR396b,osa-MIR396a,osa-MIR396c,bdi-MIR396e,bdi-MIR396c,bdi-MIR396d,sbi-MIR396a,sbi-MIR396b,sbi-MIR396c,zma-MIR396b,zma-MIR396a,zma-MIR396e,zma-MIR396f,ata-MIR396c,ata-MIR396e,vca-MIR396,sof-MIR396,ssp-MIR396,mtr-MIR396a,mtr-MIR396b,gma-MIR396i,gma-MIR396f,gma-MIR396e,gma-MIR396d,gma-MIR396b,gma-MIR396h,gma-MIR396k,gma-MIR396a,gma-MIR396c,gma-MIR396g,ptc-MIR396c,ptc-MIR396e,ptc-MI…	aof-MIR396b	ttcataaatggttctctttgtatttTTCCACAGCTTTCTTGAACTGcatagaaaagggcttcaattgccgaaggctgccaattttgcggttcaataaagctgtgggaaattacagagggagactaaattgaccg	aof-miR396b	TTCCACAGCTTTCTTGAACTG	3'	Diff	gp2b	...((((....((((....(((.....)))....))))))))...	39	37.8	-3	0.2	0	0	0	0	4	0	0	0	0	0	0	3	0	0	0	0	2.82245	0	0	0	0	0	0	3.42483	low
108	94	sbi-MIR398-p5_2ss5GA18AG	GGGGACGGACTGGGAACG	18	chr6	+	17220433	17220487	GGGGACGGACTGGGAACGgcccccccttgcgggggggccttctccgggcgtcgaa	2	sbi-MIR398,zma-MIR398b,	sbi-MIR398	gggggcggactgggaacacatgggaatgagagatgagattgctcggtcgtgctggccctgggctcgtagttgatctgcttgtatgcaTGTGTTCTCAGGTCGCCCCCGc	sbi-MIR398-p5	gggggcggactgggaaca	5'	New	gp2b	...((((..(((((((.(((((((((....)))))))))))).)))).))))...	49	76.4	-38.1	0.9	5	0	2.5	2.5	4	0	0	5.5	0	12	21.5	0	1.88143	0	2.39479	11.3065	2.82245	0	0	3.35529	0	6.5637	7.36427	0	middle
109	95	sbi-MIR398-p3_2ss5GA18AG	GGGGACGGACTGGGAACG	18	unanchor1	+	545780	545880	gggtcccagccccgaacccgtcggctgtcggcggactgctcgagctgctcccacggcgagagcgggccaccacgtgccggccgGGGGACGGACTGGGAACG	2	sbi-MIR398,zma-MIR398b,	sbi-MIR398	gggggcggactgggaacacatgggaatgagagatgagattgctcggtcgtgctggccctgggctcgtagttgatctgcttgtatgcaTGTGTTCTCAGGTCGCCCCCGc	sbi-MIR398-p3	gggggcggactgggaaca	3'	New	gp2b	...((((((..(((..((((((((((((.((.((.((((((..((((......))))..)))))).)).))))).))))))..)))..))).))))))...	95	76.2	-56.4	0.7	5	0	2.5	2.5	4	0	0	5.5	0	12	21.5	0	1.88143	0	2.39479	11.3065	2.82245	0	0	3.35529	0	6.5637	7.36427	0	middle
110	96	ppe-MIR399f-p5_2ss6TA18CT	AAATGAACAATCACTTTT	18	chr2	+	431259288	431259372	AAATGAACAATCACTTTTtttgttgggccaataaaaaccatatccatctcctacttggtggagccaactgttaaaaaaaaagaac	8	ppe-MIR399f,ppe-MIR399i,ppe-MIR399k,ppe-MIR399j,ppe-MIR399h,ppe-MIR399l,ppe-MIR399e,ppe-MIR399g,	ppe-MIR399f	tcaaataagcaaagcagtcatagggctcctctttcttggcaggcactggtgactgatgcagctacaaatgtacaatcactttcattgaccTGCCAAAGAAGAGTTGCCCTAcaattgctttggcttaatga	ppe-MIR399f-p5	aaatgtacaatcactttc	5'	New	gp2b	.............((((((((..(((...........)))..((((((........))))))............))))))))...	69	34.1	-13.5	0.5	8	3	6.5	7.5	22.5	15	5.5	7.5	3	10.5	22.5	36.5	3.01029	7.09796	6.22645	33.9194	15.8763	20.0336	3.76725	4.5754	14.6059	5.74324	7.70679	41.6688	middle
111	97	ppe-MIR399j-p5_2ss6CA18CT	AAATGAACAATCACTTTT	18	chr2	+	431366536	431366633	AAATGAACAATCACTTTTtttttttttttttttgccaacaaaaattgttatatatatatcttccctttttggccgctcgctcttgggtagtgattcaa	8	ppe-MIR399j,ppe-MIR399k,ppe-MIR399f,ppe-MIR399i,ppe-MIR399e,ppe-MIR399g,ppe-MIR399h,ppe-MIR399l,	ppe-MIR399j	tcaaataagcaaagcagtcatagggctcctctttcttggcaggcactggtgactgatgcagctacaaatgcacaatcactttcattgaccTGCCAAAGAAGAGTTGCCCTAcgattgctttggcttaatga	ppe-MIR399j-p5	aaatgcacaatcactttc	5'	New	gp2b	........(((((((.............((((((....))))))..................(((.....(((.....)))...))).)))))))...	87	29.6	-12.2	0.4	8	3	6.5	7.5	22.5	15	5.5	7.5	3	10.5	22.5	36.5	3.01029	7.09796	6.22645	33.9194	15.8763	20.0336	3.76725	4.5754	14.6059	5.74324	7.70679	41.6688	middle
112	98	aof-miR408	TGCACTGCCTCTTCCCTGGCT	21	chr1	+	98049205	98049369	agagagaagaacagagggaagattgattgagaaggagagcagctaaagacagggacgaagtggagcatgggatggggtttataacatgagctttgttgtttcccttcccaTGCACTGCCTCTTCCCTGGCTctctctctccattttcttttttggttttctcgat	42	aof-MIR408,osa-MIR408,bdi-MIR408,sbi-MIR408,zma-MIR408b,zma-MIR408a,tae-MIR408,vca-MIR408,sof-MIR408b,sof-MIR408a,sof-MIR408d,sof-MIR408c,ssp-MIR408d,ssp-MIR408a,mtr-MIR408,gma-MIR408b,gma-MIR408a,gma-MIR408d,gma-MIR408c,ptc-MIR408,ath-MIR408,mdm-MIR408a,mdm-MIR408b,mdm-MIR408d,stu-MIR408b,aly-MIR408,mes-MIR408,vvi-MIR408,nta-MIR408,csi-MIR408,lus-MIR408a,cme-MIR408,sly-MIR408,cas-MIR408,cpa-MIR4…	aof-MIR408	ataacaaatacaggaaggcgaaggcgaagccggcattgaagatattggcattgagagttgttgttgcccttttcaTGCACTGCCTCTTCCCTGGCTtccatcaccctttcgcctcctcttctttctctcccctccaaaatgctagctgtgc	aof-miR408	TGCACTGCCTCTTCCCTGGCT	3'	Yes	gp2b	...(((((((.((((..(((((..(((.((((..((((((.........((((((.((.(..(.((((((((.((((...((((((.......))))))..)))))))))))).)..).)).))))))))))))..)))).))).))))))))).)))))))...	159	46.1	-72.9	1	602.5	63	199.5	4	159	99	81.5	161	31.5	17	13.5	0	226.713	149.057	191.104	18.0903	112.192	132.222	55.8238	98.2186	153.362	9.29858	4.62408	0	middle
113	98	aof-miR408	TGCACTGCCTCTTCCCTGGCT	21	chr1	+	98175455	98175629	gagatcgagaagaacagagggaagattgattgagaaggagagcagctaaagacagggacgaagtggagcatgggatggggtttataacatgagctttgttgtttcccttcccaTGCACTGCCTCTTCCCTGGCTctctctctctctccattttcttttttggttttctcgatgaa	41	aof-MIR408,osa-MIR408,bdi-MIR408,sbi-MIR408,zma-MIR408b,zma-MIR408a,tae-MIR408,vca-MIR408,sof-MIR408b,sof-MIR408a,sof-MIR408d,sof-MIR408c,ssp-MIR408d,ssp-MIR408a,mtr-MIR408,gma-MIR408b,gma-MIR408d,gma-MIR408a,gma-MIR408c,ptc-MIR408,ath-MIR408,mdm-MIR408a,stu-MIR408b,stu-MIR408a,aly-MIR408,mes-MIR408,vvi-MIR408,nta-MIR408,csi-MIR408,lus-MIR408a,cme-MIR408,sly-MIR408,cas-MIR408,cpa-MIR408,rco-MIR40…	aof-MIR408	ataacaaatacaggaaggcgaaggcgaagccggcattgaagatattggcattgagagttgttgttgcccttttcaTGCACTGCCTCTTCCCTGGCTtccatcaccctttcgcctcctcttctttctctcccctccaaaatgctagctgtgc	aof-miR408	TGCACTGCCTCTTCCCTGGCT	3'	Yes	gp2b	...((((((((((..(((..((((((.((..((((..((((((.........((((((.((.(..(.((((((((.((((...((((((.......))))))..)))))))))))).)..).)).))))))))))))..))))..)).))))))..)))...))))))))))...	169	46.3	-81.5	1	602.5	63	199.5	4	159	99	81.5	161	31.5	17	13.5	0	226.713	149.057	191.104	18.0903	112.192	132.222	55.8238	98.2186	153.362	9.29858	4.62408	0	middle
114	99	aof-miR408_R+1	TGCACTGCCTCTTCCCTGGCTT	22	chr11	+	170965259	170965423	agagagaagaacagagggaagattgattgagaaggagagcagctaaagacagggacgaagtggggcatgggatggggtttataacatgagctttgttgtttcccttcccaTGCACTGCCTCTTCCCTGGCTCtctctcaccattttcttttttggttttctcgat	43	aof-MIR408,osa-MIR408,bdi-MIR408,sbi-MIR408,zma-MIR408a,zma-MIR408b,tae-MIR408,vca-MIR408,sof-MIR408d,sof-MIR408c,sof-MIR408b,sof-MIR408a,ssp-MIR408a,ssp-MIR408d,mtr-MIR408,gma-MIR408c,gma-MIR408b,gma-MIR408a,gma-MIR408d,ptc-MIR408,ath-MIR408,mdm-MIR408a,mdm-MIR408b,mdm-MIR408d,stu-MIR408b,stu-MIR408a,aly-MIR408,mes-MIR408,vvi-MIR408,nta-MIR408,csi-MIR408,lus-MIR408a,cme-MIR408,sly-MIR408,cas-MIR…	aof-MIR408	ataacaaatacaggaaggcgaaggcgaagccggcattgaagatattggcattgagagttgttgttgcccttttcaTGCACTGCCTCTTCCCTGGCTtccatcaccctttcgcctcctcttctttctctcccctccaaaatgctagctgtgc	aof-miR408	TGCACTGCCTCTTCCCTGGCT	3'	Diff	gp2b	...(((((((..(((..((((((....(((((..((((((.........((((((.((.(..(.((((((((.((((...((((((.......))))))..)))))))))))).)..).)).)))))))))))))))))..))))))..)))...)))))))...	159	46.7	-69.8	0.9	311.5	34	116.5	7.5	175.5	94	43.5	80.5	25	16	10.5	0	117.213	80.4435	111.597	33.9194	123.835	125.544	29.7955	49.1093	121.716	8.7516	3.5965	0	middle
115	100	aof-MIR408-p3_2ss18GT19GT	TGCACTGCCTCTTCCCTTT	19	chr3	-	142447689	142447748	tgtaggaggcacaagagagcaagaagagctaaagcttgaacTGCACTGCCTCTTCCCTTT	43	aof-MIR408,osa-MIR408,bdi-MIR408,sbi-MIR408,zma-MIR408a,zma-MIR408b,tae-MIR408,ata-MIR408,vca-MIR408,sof-MIR408d,sof-MIR408c,sof-MIR408b,sof-MIR408a,ssp-MIR408a,ssp-MIR408d,mtr-MIR408,gma-MIR408c,gma-MIR408b,gma-MIR408d,gma-MIR408a,ptc-MIR408,ath-MIR408,mdm-MIR408b,mdm-MIR408d,mdm-MIR408a,stu-MIR408b,aly-MIR408,mes-MIR408,vvi-MIR408,nta-MIR408,csi-MIR408,lus-MIR408a,cme-MIR408,sly-MIR408,cas-MIR4…	aof-MIR408	ataacaaatacaggaaggcgaaggcgaagccggcattgaagatattggcattgagagttgttgttgcccttttcaTGCACTGCCTCTTCCCTGGCTtccatcaccctttcgcctcctcttctttctctcccctccaaaatgctagctgtgc	aof-MIR408-p3	TGCACTGCCTCTTCCCTGG	3'	New	gp2b	...((((((((.....(.(((....((((....))))....))).)))))))))......	51	48.3	-16.9	0.6	2.5	0	2.5	0	7.5	3.5	0	0	0	0	0	0	0.940716	0	2.39479	0	5.29209	4.67451	0	0	0	0	0	0	low
116	101	aof-MIR408-p5_2ss18GT19GT	TGCACTGCCTCTTCCCTTT	19	chr3	-	259514979	259515072	ccaactatgTGCACTGCCTCTTCCCTTGaaatgtaactgttggtccccctggtgcctttattacaaccttcttactcttgcactcaatagtggc	43	aof-MIR408,osa-MIR408,bdi-MIR408,sbi-MIR408,zma-MIR408b,zma-MIR408a,tae-MIR408,ata-MIR408,vca-MIR408,sof-MIR408a,sof-MIR408b,sof-MIR408c,sof-MIR408d,ssp-MIR408d,ssp-MIR408a,mtr-MIR408,gma-MIR408a,gma-MIR408d,gma-MIR408b,gma-MIR408c,ptc-MIR408,ath-MIR408,mdm-MIR408b,mdm-MIR408d,mdm-MIR408a,stu-MIR408b,aly-MIR408,mes-MIR408,vvi-MIR408,nta-MIR408,csi-MIR408,lus-MIR408a,cme-MIR408,sly-MIR408,cas-MIR4…	aof-MIR408	ataacaaatacaggaaggcgaaggcgaagccggcattgaagatattggcattgagagttgttgttgcccttttcaTGCACTGCCTCTTCCCTGGCTtccatcaccctttcgcctcctcttctttctctcccctccaaaatgctagctgtgc	aof-MIR408-p5	TGCACTGCCTCTTCCCTGG	5'	New	gp2b	((.((((((((((.......(((....))).(((((.((..((..((...))..))..))))))).............)))))...))))))).	93	46.8	-17.2	0.4	2.5	0	2.5	0	7.5	3.5	0	0	0	0	0	0	0.940716	0	2.39479	0	5.29209	4.67451	0	0	0	0	0	0	low
117	102	osa-MIR444b-p5	TGTCTCAAGCTTGCTGCCTCC	21	chr6	+	15034412	15034479	tgcTGTCTCAAGCTTGCTGCCTCCctctgcgagaactagtatgcgagaactagtaagttgggacaaaa	12	osa-MIR444b,osa-MIR444c,osa-MIR444a,osa-MIR444d,osa-MIR444f,bdi-MIR444c,bdi-MIR444d,bdi-MIR444b,tae-MIR444b,tae-MIR444a,hvu-MIR444b,ssp-MIR444c,	osa-MIR444b	atgcaaggggatggtgacaagcttgtggcagcaactgcacatcttgcaagaaaatctttagggtttttcagaccataccgatgattttcttgcaagttgtgcagtTGTTGTCTCAAGCTTGCTGCCtccctttgccaa	osa-MIR444b-p5	TGTCTCAAGCTTGCTGCCtcc	5'	New	gp2b	...((((((.(((((((((.(((....(((........)))...)))...)))))))))))))))...	62	48.5	-19.6	0.6	1308	82	833.5	73	1220.5	173	704	778.5	40	690	5513	86.5	492.183	194.011	798.423	330.149	861.2	231.054	482.208	474.926	194.746	377.413	1888.34	98.7493	high
118	103	osa-MIR444d-p5_2ss14CT17CT	TGCCTCAAGCTTGTTGTCTCC	21	chr6	-	15125861	15125939	ttttcttgtaagttgtgcagttgcTGCCTCAAGCTTGTTGTCTCCctctatgcaaactggagagtactatggtgctata	15	osa-MIR444b,osa-MIR444d,osa-MIR444a,osa-MIR444f,bdi-MIR444d,bdi-MIR444c,bdi-MIR444b,zma-MIR444b,zma-MIR444a,tae-MIR444a,tae-MIR444b,hvu-MIR444b,hvu-MIR444a,ssp-MIR444a,ssp-MIR444c,	osa-MIR444d	agttattgcacatggtggcaccaagcatgaggcaacaactgcattacttgcaagaaaggcacaaaatcattagatgattacTTGTGGCTTTCTTGCAAGTTGTGCAGTTGCTGCCTCAAGCTTgctgcctccctctgccaaat	osa-MIR444d-p5	TGCCTCAAGCTTgctgcctcc	5'	New	gp2b	........((((((..((((...))))....))))))...(((((.............)))))((((....))))....	29	43	-13.5	0.4	116	9	55	21.5	541	163.5	77.5	58.5	5	206.5	442.5	38.5	43.6492	21.2939	52.6854	97.2356	381.736	218.366	53.084	35.6881	24.3432	112.95	151.567	43.952	middle
119	104	osa-MIR444d-p3_2ss14CT17CT	TGCCTCAAGCTTGTTGTCTCC	21	chr9	-	144095757	144095797	cttgcaagctgtgaagttgcTGCCTCAAGCTTGTTGCCTCC	7	osa-MIR444d,osa-MIR444a,osa-MIR444f,bdi-MIR444b,tae-MIR444a,tae-MIR444b,hvu-MIR444a,	osa-MIR444d	agttattgcacatggtggcaccaagcatgaggcaacaactgcattacttgcaagaaaggcacaaaatcattagatgattacTTGTGGCTTTCTTGCAAGTTGTGCAGTTGCTGCCTCAAGCTTgctgcctccctctgccaaat	osa-MIR444d-p3	TGCCTCAAGCTTgctgcctcc	3'	New	gp2b	...(((((((.(((.((....)).)))))))))).......	31	53.7	-11.3	0.5	116	9	55	21.5	541	163.5	77.5	58.5	5	206.5	442.5	38.5	43.6492	21.2939	52.6854	97.2356	381.736	218.366	53.084	35.6881	24.3432	112.95	151.567	43.952	middle
120	105	osa-MIR444d-p3	TGCCTCAAGCTTGCTGCCTCC	21	chr9	-	225803590	225803628	tatgcaattgcTGCCTCAAGCTTGCTGCCTCCctctacc	10	osa-MIR444d,osa-MIR444a,osa-MIR444f,osa-MIR444c,osa-MIR444b,bdi-MIR444b,bdi-MIR444d,bdi-MIR444c,tae-MIR444a,tae-MIR444b,	osa-MIR444d	agttattgcacatggtggcaccaagcatgaggcaacaactgcattacttgcaagaaaggcacaaaatcattagatgattacTTGTGGCTTTCTTGCAAGTTGTGCAGTTGCTGCCTCAAGCTTgctgcctccctctgccaaat	osa-MIR444d-p3	TGCCTCAAGCTTgctgcctcc	3'	New	gp2b	...((((..(((......)))))))..............	22	53.8	-5.8	0.3	30	0	21.5	9	175.5	68.5	10	3.5	0	134	342	6	11.2886	0	20.5952	40.7033	123.835	91.4868	6.84955	2.13519	0	73.2947	117.143	6.84966	middle
121	106	osa-MIR444b-p3	TGTCTCAAGCTTGCTGCCTCC	21	chr9	-	225949841	225949900	attttcttgtaagttttgtagttgcTGTCTCAAGCTTGCTGCCTCCctctgcgagaacta	12	osa-MIR444b,osa-MIR444c,osa-MIR444f,osa-MIR444a,osa-MIR444d,bdi-MIR444c,bdi-MIR444d,bdi-MIR444b,tae-MIR444b,tae-MIR444a,hvu-MIR444b,ssp-MIR444c,	osa-MIR444b	atgcaaggggatggtgacaagcttgtggcagcaactgcacatcttgcaagaaaatctttagggtttttcagaccataccgatgattttcttgcaagttgtgcagtTGTTGTCTCAAGCTTGCTGCCtccctttgccaa	osa-MIR444b-p3	TGTCTCAAGCTTGCTGCCtcc	3'	New	gp2b	...((((((((((....(((((.(((......)))..)))))....)).))))))))...	54	43.3	-16.3	0.6	1308	82	833.5	73	1220.5	173	704	778.5	40	690	5513	86.5	492.183	194.011	798.423	330.149	861.2	231.054	482.208	474.926	194.746	377.413	1888.34	98.7493	high
122	107	osa-MIR444c-p5_1ss1TC	CTGTCTCAAGCTTGCTGCCTCC	22	chr9	-	226004193	226004257	gCTGTCTCAAGCTTGCTGCCTCCctctgcgagaactggtaagttggggcaaaaagttttgaccat	10	osa-MIR444c,osa-MIR444b,osa-MIR444d,osa-MIR444a,bdi-MIR444d,bdi-MIR444c,bdi-MIR444b,tae-MIR444a,tae-MIR444b,hvu-MIR444b,	osa-MIR444c	agttgctgcaagtggaggcggcaagctagagacagcaactgcatatcttgcaagaaaatcggttttatggccataccgatgattttcttgcaagctgtgcagtTGTTGTCTCAAGCTTGCTGCCtccctttgccagaa	osa-MIR444c-p5	TTGTCTCAAGCTTGCTGCCtcc	5'	New	gp2b	...(((..((((((..((((.((..((((........)).))..))))))..)))))).)))...	59	50.8	-17.5	0.5	6	0	0	0	8	0	0	6.5	0	2.5	63.5	0	2.25772	0	0	0	5.6449	0	0	3.96535	0	1.36744	21.7503	0	middle
123	108	lja-miR477-5p_R-1_1ss1AG	GCTCTCCCTCAAGGGCTTCTG	21	chr1	+	232843701	232843812	tctttgagtcatctagcattcGCTCTCCCTCAAGGGCTTCTGtctgataatgctagctgtagttctgatcagaagcctcttagaggagagtgaaggacagatgtctcagcca	8	lja-MIR477,mes-MIR477b,mes-MIR477c,mes-MIR477a,mes-MIR477e,nta-MIR477a,csi-MIR477e,csi-MIR477d,	lja-MIR477	gtagcatttattgctcACTCTCCCTCAAGGGCTTCTGAaatcgcctccaaagaagctagtcTGAAGTTCTTAGGGAGAGTGGttaatatttgttac	lja-miR477-5p	ACTCTCCCTCAAGGGCTTCTGA	5'	Diff	gp2b	...(((((.(((((....((((((((((((.(((((((((((((.((...(((.....)))..)).)).)))))))).))))).))))))))))....))))).)))))...	106	47.3	-51.4	1	3	0	0	0	22	0	0	0	0	0	14	0	1.12886	0	0	0	15.5235	0	0	0	0	0	4.79534	0	middle
124	108	lja-miR477-5p_R-1_1ss1AG	GCTCTCCCTCAAGGGCTTCTG	21	chr2	-	288449084	288449195	tctttgagtcatctagcattcGCTCTCCCTCAAGGGCTTCTGtctgataatgctagctgtagttctgatcagaagcctcttagaggagagtgaaggacagatgtctcagcca	8	lja-MIR477,mes-MIR477b,mes-MIR477c,mes-MIR477e,mes-MIR477a,nta-MIR477a,csi-MIR477d,csi-MIR477e,	lja-MIR477	gtagcatttattgctcACTCTCCCTCAAGGGCTTCTGAaatcgcctccaaagaagctagtcTGAAGTTCTTAGGGAGAGTGGttaatatttgttac	lja-miR477-5p	ACTCTCCCTCAAGGGCTTCTGA	5'	Diff	gp2b	...(((((.(((((....((((((((((((.(((((((((((((.((...(((.....)))..)).)).)))))))).))))).))))))))))....))))).)))))...	106	47.3	-51.4	1	3	0	0	0	22	0	0	0	0	0	14	0	1.12886	0	0	0	15.5235	0	0	0	0	0	4.79534	0	middle
125	109	aof-miR477a_1ss20CT	ACTCTCCCTCAAGGGCTTCTG	21	chr1	+	233046081	233046193	tctttgagtcatctagcattcACTCTCCCTCAAGGGCTTCTGtcatatgatgctacctgcagttctgatcagaagccctctcagaggagagtgaaggatagatgcctcaagct	17	aof-MIR477a,gma-MIR5036,mdm-MIR477b,lja-MIR477,mes-MIR477i,mes-MIR477c,mes-MIR477b,mes-MIR477e,mes-MIR477a,mes-MIR477d,nta-MIR477a,csi-MIR477d,csi-MIR477e,csi-MIR477c,csi-MIR477b,aqc-MIR477e,aqc-MIR477b,	aof-MIR477a	gtggttgctcACTCTCCCTCAAGGGCTTCCGactcagccattattaatgcgggattgtgcaacgagagtttgattggcataagttggaagctcttgtttgggtggggtggggggggattgaacagcctct	aof-miR477a	ACTCTCCCTCAAGGGCTTCCG	5'	Diff	gp2b	..((((((.((((((...((((((((((((..(((((((((((((.....(((.....)))....))).))))))))))...)).))))))))))...)))))).))))))..	109	47.8	-56.8	1.1	0	0	0	0	14	2.5	0	0	0	3	16.5	0	0	0	0	0	9.87857	3.33893	0	0	0	1.64093	5.65165	0	low
126	110	aof-miR477b_L-1_1ss21CT	TCTCTCTCCCTCAAAGGCTTT	21	chr10	-	170062841	170062873	TCTCTCTCCCTCAAACGCTTTatattgaggaac	3	aof-MIR477b,ppe-MIR477,cme-MIR477b,	aof-MIR477b	gccctttgggATCTCTCTCCCTCAAAGGCTCTcatacccagatgtgaaatctgagttgaagccttgagggtcagagatcctagaggcct	aof-miR477b	ATCTCTCTCCCTCAAAGGCTCT	5'	Diff	gp2b	........((((((..........))))))...	22	42.4	-6.1	0.4	0	0	0	0	12.5	0	0	0	0	5.5	0	0	0	0	0	0	8.82015	0	0	0	0	3.00836	0	0	low
127	110	aof-miR477b_L-1_1ss21CT	TCTCTCTCCCTCAAAGGCTTT	21	chr6	+	240806426	240806619	atatggagtagaggttttagtgttgagatttgagaagggcatgggtttctagggTCTCTCTCCCTCAAAGGCTTTatattgaggaactttcgggctaattaattaatgcttcatgccttcgtataaccctttgagtggaagagacctcagaattgttccatgccttcatatacattaatggctttggtccaagt	3	aof-MIR477b,ppe-MIR477,cme-MIR477b,	aof-MIR477b	gccctttgggATCTCTCTCCCTCAAAGGCTCTcatacccagatgtgaaatctgagttgaagccttgagggtcagagatcctagaggcct	aof-miR477b	ATCTCTCTCCCTCAAAGGCTCT	5'	Diff	gp2b	...((((..((((...(((((((.......(((...(((((((((.((((..(((((((.(((((((((((..((((((..(((........(((............))).....)))..)))))).)))))))).))))))))))..))))....))))))))))))...)))))))...))))..))))...	188	40.7	-68.1	0.9	0	0	0	0	12.5	0	0	0	0	5.5	0	0	0	0	0	0	8.82015	0	0	0	0	3.00836	0	0	low
128	111	lja-miR477-5p_R-1	ACTCTCCCTCAAGGGCTTCTG	21	chr3	+	274784258	274784375	tttgaggcatctagcattcACTCTCCCTCAAGGGCTTCTGtgctcttatgctctcaggtgtatataagtgcagctcagaagctcttctgttgggagagtgaaggatacatgtctctgg	13	gma-MIR5036,lja-MIR477,mes-MIR477b,mes-MIR477c,mes-MIR477e,mes-MIR477a,mes-MIR477d,nta-MIR477a,csi-MIR477d,csi-MIR477e,csi-MIR477b,aqc-MIR477e,aqc-MIR477b,	lja-MIR477	gtagcatttattgctcACTCTCCCTCAAGGGCTTCTGAaatcgcctccaaagaagctagtcTGAAGTTCTTAGGGAGAGTGGttaatatttgttac	lja-miR477-5p	ACTCTCCCTCAAGGGCTTCTGA	5'	Diff	gp2b	...(((((((.((...(((((((((((..(((((((((((.((((((((((........)))))..))...))).))))))))))).....)))))))))))...)).)))))))...	112	47.5	-53.1	0.9	0	0	0	0	14	2.5	0	0	0	3	16.5	0	0	0	0	0	9.87857	3.33893	0	0	0	1.64093	5.65165	0	low
129	112	osa-MIR816-p3_2ss7TG17AC	TGGATAGGACAGAGGTCT	18	chr1	+	195275663	195275824	aagtgaagaatgggccgggtgcatctgtgaaagacttttgttttattacctcagatatcttacatagaatctacaaaataaaataggaatgaaaagcgtccattgtttaaTGGATAGGACAGAGGTCTcaacaatggcctaggttatatcaatttttcagag	1	osa-MIR816,	osa-MIR816	atGTGACATATTTTACTACAACgaatctggatatgacagaggtatgtttaaattcgtagtattaggatgtgtcacat	osa-MIR816-p3	tggatatgacagaggtat	3'	New	gp2b	...(((((((((((((((((.(((.(((...((((((((((((((((.(((.((((.(((.....)))))))............)))))))).....(((((((....)))))))..)))))))))))..)))))))))).)))....))).)))))))...	156	35.8	-37.9	0.7	0	0	0	3.5	3	5	0	0	0	4.5	6	2.5	0	0	0	15.8291	2.11684	6.67787	0	0	0	2.46139	2.05514	2.85402	middle
130	113	osa-MIR816-p5_2ss7TG17AC	TGGATAGGACAGAGGTCT	18	chr6	+	66939847	66939879	TGGATAGGACAGAGGTCTtctaaacctttggaa	1	osa-MIR816,	osa-MIR816	atGTGACATATTTTACTACAACgaatctggatatgacagaggtatgtttaaattcgtagtattaggatgtgtcacat	osa-MIR816-p5	tggatatgacagaggtat	5'	New	gp2b	.........(((((((.......)))))))...	21	42.4	-7.5	0.5	0	0	0	3.5	3	5	0	0	0	4.5	6	2.5	0	0	0	15.8291	2.11684	6.67787	0	0	0	2.46139	2.05514	2.85402	middle
131	114	ath-MIR846-p3_2ss16TA17CT	GCAGTGGGATAATGAATT	18	chr1	+	453101177	453101206	ggatatacccacGCAGTGGGATAATGAATT	2	ath-MIR846,aly-MIR846,	ath-MIR846	caaacatcttgaatccgttgaggttgatcacgatgatgccacatccggtttCATTCAAGGACTTCTATTCAGaacaaacttcatgatttctgaactaattggatatgataaatggtaacaagtattcacttgcattcaagggacaaaaaatcattgggatatatgattatgacaaacacgattggaagctgaatggttgcgggaggcaagcagtgggataatgatctgcaagtggaaacttcttacttttatcatatcccatcagctcgaaagtcttgatgttagttTTGAATTGAAGTGCTTGAATTacaccagatttattgtgctcgtgtatcccggtaaattcgactaatgaccaa	ath-MIR846-p3	gcagtgggataatgatct	3'	New	gp2b	...(((.(((((...)))))))).......	20	43.3	-6.5	0.5	0	0	0	0	0	0	0	0	0	0	0	10	0	0	0	0	0	0	0	0	0	0	0	11.4161	middle
132	115	osa-miR1863a_R-3_2ss1AT18AG	TGCTCTGATACCATGTTGGAT	21	chr6	-	50178250	50178367	ctatacatagcggtattttttttaaaatccacatttaaattacgtagccggtgggattcaaacatgggtTGCTCTGATACCATGTTGGATtattgggattgaatataactgtgtgcaa	2	osa-MIR1863a,cme-MIR1863,	osa-MIR1863a	ccatatctctagtctaatatggtatccgagcttattggttagttgctcttgttccctcaatcccgtttgtctccatccacaaccacacgagtgcaaagcctcacattcatgtcaacaacaactctcatgtcattagcaaatctagtgtctagcatcaacacctaggtagcacttattggttaaaaagggcatttgctaggaaaaatgagcaaccactagtccactacacgtttggatgcttgacaatatgtgcgctttggtgcttgcaataataatgttgtgatggaaggtttgtcactaaatattggttagcaaagttgcagtatggggaagaccaataAGCTCTGATACCATGTTAGATTAGtgatatgcct	osa-miR1863a	AGCTCTGATACCATGTTAGATTAG	3'	Diff	gp2b	...(((((((..((((((.((..(((((((((((....((((.((((((..((.........))..))))))..))))...))).)))))).))..))..))))))..)))))))...	112	35.6	-28.9	0.7	0	0	0	0	0	0	0	0	0	0	0	5	0	0	0	0	0	0	0	0	0	0	0	5.70805	low
133	116	cme-MIR1863-p5_2ss10TG18GA	CAGACAACGGGGGTTTGA	18	unanchor322	-	310861	310934	agaatgggcattttttCAGACAACGGGGGTTTGAttgttcaataacaagctaccttttgcacagtgcctataat	1	cme-MIR1863,	cme-MIR1863	gaatcgaatctgaacaaagggagttcggggcgtggtgggttacagacaacgtgggtttggggcgtggtattgtgacggacatgcgttttttgggtatttggccgtcaggttgctagggtgttgaacgacggacggcgaacggttttagggacgacaaactgatgagttttatggggttttgtggggttggaatggcagatctgaaagcgtgggtttcgggttggggacatgagttgaagggtttgcagcggacatggaaggagaaaggggcagcgacggtggctgtgggagaaaggtggatgcggcggcgacggtgactgtggagaaaaaggggcagcggcgggtctaaggttggagggagcgacggctgatgcgtgaagcttcgacaggcgtgcgtgg…	cme-MIR1863-p5	cagacaacgtgggtttgg	5'	New	gp2b	...(((((((((....((((....((..(((((.((((...)))))))))..)).))))...)))))))))...	68	39.2	-18.6	0.6	0	0	0	7	11	22	0	0	0	0	0	0	0	0	0	31.6581	7.76173	29.3826	0	0	0	0	0	0	middle
134	117	osa-MIR2118e-p3_2ss12TA18CT	AAAAGAGAGTCAAAGAGT	18	chr1	+	238543289	238543316	aaggactttgAAAAGAGAGTCAAAGAGT	1	osa-MIR2118e,	osa-MIR2118e	agtgagtcaggaagaggaagaaaagagagtctaagagcagcaggcatgggaacatggaggaaaaaacatatatagttttcttcccctctaaagttagaggttgaaatttgctgtgtgtttTTCCCAATGCCTCCCATGCCTAcagttcttaggcactccttccacttcctgttggct	osa-MIR2118e-p3	aaaagagagtctaagagc	3'	New	gp2b	...((((((......)))))).......	18	35.7	-5.6	0.6	2.5	0	0	0	6.5	0	0	3	2.5	5	11	30.5	0.940716	0	0	0	4.58648	0	0	1.83016	12.1716	2.73488	3.76777	34.8191	middle
135	117	osa-MIR2118e-p3_2ss12TA18CT	AAAAGAGAGTCAAAGAGT	18	chr5	+	144032523	144032550	aaggactttgAAAAGAGAGTCAAAGAGT	1	osa-MIR2118e,	osa-MIR2118e	agtgagtcaggaagaggaagaaaagagagtctaagagcagcaggcatgggaacatggaggaaaaaacatatatagttttcttcccctctaaagttagaggttgaaatttgctgtgtgtttTTCCCAATGCCTCCCATGCCTAcagttcttaggcactccttccacttcctgttggct	osa-MIR2118e-p3	aaaagagagtctaagagc	3'	New	gp2b	...((((((......)))))).......	18	35.7	-5.6	0.6	2.5	0	0	0	6.5	0	0	3	2.5	5	11	30.5	0.940716	0	0	0	4.58648	0	0	1.83016	12.1716	2.73488	3.76777	34.8191	middle
136	118	osa-MIR2118e-p3_1ss13TA	GAAAAGAGAGTCAAAGAG	18	chr10	+	239178454	239178480	aaggactttGAAAAGAGAGTCAAAGAG	1	osa-MIR2118e,	osa-MIR2118e	agtgagtcaggaagaggaagaaaagagagtctaagagcagcaggcatgggaacatggaggaaaaaacatatatagttttcttcccctctaaagttagaggttgaaatttgctgtgtgtttTTCCCAATGCCTCCCATGCCTAcagttcttaggcactccttccacttcctgttggct	osa-MIR2118e-p3	gaaaagagagtctaagag	3'	New	gp2b	...((((((......))))))......	18	37	-5.6	0.6	0	0	0	0	4	2.5	0	3	0	2.5	4	8.5	0	0	0	0	2.82245	3.33893	0	1.83016	0	1.36744	1.3701	9.70368	low
137	119	mtr-MIR2592ay-p5_2ss6AG17CG_1	GAGTCGGGTTGTTTGGGA	18	chr2	+	18645881	18646058	ccccgtccggcccggaccctgccgccccacgaggtgctgtcggcGAGTCGGGTTGTTTGGGAtgcagccccaatcgggcggtaaattccgtccaaggctaaatagcggcgagagaccgatagcgaacaagtaccgcgagggaaagatgaaaaggactttGAAAAGAGAGTCAAAGAGT	3	osa-MIR2118e,ssp-MIR169,mtr-MIR2592ay,	mtr-MIR2592ay	atcaaaagcttgattccgccagaagatcgtcattagttagggtaaggtgcattccaactgcaacaattgtcttacctctgaaatggggtaattcaaacttgccaaacggccaggactcaagcatttcgCTCGGCATTCATGTTTTTCCTTtgaaaagattaaattcttgttAGGCTGGTTTAGATGAAGGTAttaagtgtcaaggaatgaacctcatttcgttggcacttgaataccatcatctaaagcacacctaacaaaaatttattcttttcaaaggaaaacatgaatgccgggtgaaatgcttgagtcaggttgtttggcaagtttgaatttaccccattcaaaggtaagacaattgttgtagttggaatgcacattccaactgcaacaattatc…	mtr-MIR2592ay-p5	gagtcaggttgtttggca	5'	New	gp2b	...((((.(((.........)))..(((.((.((((((((..((..(((((.....(((((.......)))))..((((((......))))))...(((....))).........))))).))..)).)))))).)).)))...)))).....((((((......)))))).......	116	58.4	-58.1	0.6	4.5	0	4.5	0	0	0	0	9.5	0	9	22	0	1.69329	0	4.31062	0	0	0	0	5.79551	0	4.92278	7.53553	0	low
137	120	osa-MIR2118e-p3_2ss13TA19CT	GAAAAGAGAGTCAAAGAGT	19	chr2	+	18645881	18646058	ccccgtccggcccggaccctgccgccccacgaggtgctgtcggcGAGTCGGGTTGTTTGGGAtgcagccccaatcgggcggtaaattccgtccaaggctaaatagcggcgagagaccgatagcgaacaagtaccgcgagggaaagatgaaaaggactttGAAAAGAGAGTCAAAGAGT	3	osa-MIR2118e,ssp-MIR169,mtr-MIR2592ay,	osa-MIR2118e	agtgagtcaggaagaggaagaaaagagagtctaagagcagcaggcatgggaacatggaggaaaaaacatatatagttttcttcccctctaaagttagaggttgaaatttgctgtgtgtttTTCCCAATGCCTCCCATGCCTAcagttcttaggcactccttccacttcctgttggct	osa-MIR2118e-p3	gaaaagagagtctaagagc	3'	New	gp2b	...((((.(((.........)))..(((.((.((((((((..((..(((((.....(((((.......)))))..((((((......))))))...(((....))).........))))).))..)).)))))).)).)))...)))).....((((((......)))))).......	116	58.4	-58.1	0.6	0	0	0	0	0	0	0	0	0	2.5	7	5	0	0	0	0	0	0	0	0	0	1.36744	2.39767	5.70805	low
138	119	mtr-MIR2592ay-p5_2ss6AG17CG_1	GAGTCGGGTTGTTTGGGA	18	unanchor1	+	538303	538357	GAGTCGGGTTGTTTGGGAatgcagccccaatcgggcggtaaattccatccaaggc	1	mtr-MIR2592ay,	mtr-MIR2592ay	atcaaaagcttgattccgccagaagatcgtcattagttagggtaaggtgcattccaactgcaacaattgtcttacctctgaaatggggtaattcaaacttgccaaacggccaggactcaagcatttcgCTCGGCATTCATGTTTTTCCTTtgaaaagattaaattcttgttAGGCTGGTTTAGATGAAGGTAttaagtgtcaaggaatgaacctcatttcgttggcacttgaataccatcatctaaagcacacctaacaaaaatttattcttttcaaaggaaaacatgaatgccgggtgaaatgcttgagtcaggttgtttggcaagtttgaatttaccccattcaaaggtaagacaattgttgtagttggaatgcacattccaactgcaacaattatc…	mtr-MIR2592ay-p5	gagtcaggttgtttggca	5'	New	gp2b	..(((...(((..(((((.(((.((((.....)))).)))..)))))..))))))	53	56.4	-16.4	0.5	4.5	0	4.5	0	0	0	0	9.5	0	9	22	0	1.69329	0	4.31062	0	0	0	0	5.79551	0	4.92278	7.53553	0	low
139	121	mtr-MIR2592ay-p5_2ss6AG17CG_2	GAGTCGGGTTGTTTGGGAA	19	chr3	+	14211	14240	GAGTCGGGTTGTTTGGGAAtgcagccccaa	1	mtr-MIR2592ay,	mtr-MIR2592ay	atcaaaagcttgattccgccagaagatcgtcattagttagggtaaggtgcattccaactgcaacaattgtcttacctctgaaatggggtaattcaaacttgccaaacggccaggactcaagcatttcgCTCGGCATTCATGTTTTTCCTTtgaaaagattaaattcttgttAGGCTGGTTTAGATGAAGGTAttaagtgtcaaggaatgaacctcatttcgttggcacttgaataccatcatctaaagcacacctaacaaaaatttattcttttcaaaggaaaacatgaatgccgggtgaaatgcttgagtcaggttgtttggcaagtttgaatttaccccattcaaaggtaagacaattgttgtagttggaatgcacattccaactgcaacaattatc…	mtr-MIR2592ay-p5	gagtcaggttgtttggcaa	5'	New	gp2b	.....(((((((........)))))))...	22	56.7	-10.6	0.6	4.5	0	4.5	0	0	0	0	9.5	0	9	22	0	1.69329	0	4.31062	0	0	0	0	5.79551	0	4.92278	7.53553	0	low
140	121	mtr-MIR2592ay-p5_2ss6AG17CG_2	GAGTCGGGTTGTTTGGGAA	19	unanchor1	+	601647	601767	gcaccacgaggcactgtcggcGAGTCGGGTTGTTTGGGAAtgcagccccaatcgggcggtaaattccgtccaaggctaaatagcggcgagagaccgatagcgaacaagtaccgcgagggaa	1	mtr-MIR2592ay,	mtr-MIR2592ay	atcaaaagcttgattccgccagaagatcgtcattagttagggtaaggtgcattccaactgcaacaattgtcttacctctgaaatggggtaattcaaacttgccaaacggccaggactcaagcatttcgCTCGGCATTCATGTTTTTCCTTtgaaaagattaaattcttgttAGGCTGGTTTAGATGAAGGTAttaagtgtcaaggaatgaacctcatttcgttggcacttgaataccatcatctaaagcacacctaacaaaaatttattcttttcaaaggaaaacatgaatgccgggtgaaatgcttgagtcaggttgtttggcaagtttgaatttaccccattcaaaggtaagacaattgttgtagttggaatgcacattccaactgcaacaattatc…	mtr-MIR2592ay-p5	gagtcaggttgtttggcaa	5'	New	gp2b	...((.((.((.(((((..((..(((((.....(((((........)))))..((((((......))))))...(((....))).........))))).))..))).)).)).)).))...	115	58.7	-39.1	0.6	4.5	0	4.5	0	0	0	0	9.5	0	9	22	0	1.69329	0	4.31062	0	0	0	0	5.79551	0	4.92278	7.53553	0	low
141	122	mtr-MIR2592bi-p3_2ss8TC19AT_2	ATTCCCACTGTCCCTGTCTA	20	chr5	+	144034486	144034554	ttagtggtgcgcatgaatggattaacgagATTCCCACTGTCCCTGTCTActatccagcgaaaccacagc	2	mtr-MIR2592bi,mtr-MIR2592bj,	mtr-MIR2592bi	ccaatattcgacccgcattcccattgtccctgtcaaaagattaaattcttgttagtccggtttaaatgaaggtattgaagtgtcaaggaatgaacctcattcttttcacacttaaataccgtcatttaaaccaaacctaacaagaatttaatcttttgaaTGGAACATTGGGAATGCCGGTcgtatattgg	mtr-MIR2592bi-p3	attcccattgtccctgtcaa	3'	New	gp2b	...(((((.(((.....(((((.....((((.............))))...))))))))..)))))...	63	49.3	-16.2	0.5	20	9	21	0	70	14	8	37	0	45	90	12	7.52573	21.2939	20.1162	0	49.3928	18.698	5.47964	22.572	0	24.6139	30.8272	13.6993	middle
142	123	mtr-MIR2600a-p5_2ss6GC18CA	AGAGACAGAAACACAAAAA	19	chr1	-	240405983	240406069	aaAGAGACAGAAACACAACAAaagccaacatagcaaaacaaccccttccccaaaatagcaaacactaattcacgatcggatctccca	4	mtr-MIR2600c,mtr-MIR2600a,mtr-MIR2600d,ptc-MIR7840,	mtr-MIR2600a	cgggtacacctttttgggtgACATTAGCCAATCACAATGCCacaatgcttgtgaaagagagagaaacacaaacattgtggcattgtgattggccaatgtcacccaggtattct	mtr-MIR2600a-p5	agagagagaaacacaaaca	5'	New	gp2b	...((((................((.......))........((..((.......(((......)))......))..)).))))...	81	41.4	-4.7	0.1	2.5	0	0	0	0	0	0	16.5	2.5	0	0	3	0.940716	0	0	0	0	0	0	10.0659	12.1716	0	0	3.42483	middle
143	124	mtr-MIR2600a-p3_2ss6GC18CA	AGAGACAGAAACACAAAAA	19	chr2	-	305685818	305685848	acatgtttacaaAGAGACAGAAACACAACAA	4	mtr-MIR2600c,mtr-MIR2600d,mtr-MIR2600a,ptc-MIR7840,	mtr-MIR2600a	cgggtacacctttttgggtgACATTAGCCAATCACAATGCCacaatgcttgtgaaagagagagaaacacaaacattgtggcattgtgattggccaatgtcacccaggtattct	mtr-MIR2600a-p3	agagagagaaacacaaaca	3'	New	gp2b	...(((((......)))))............	16	32.3	-1.7	0.2	2.5	0	0	0	0	0	0	16.5	2.5	0	0	3	0.940716	0	0	0	0	0	0	10.0659	12.1716	0	0	3.42483	middle
144	125	mtr-MIR2603-p3_2ss9AC17AC	GTCCCTGCCCTTTGTACA	18	chr2	+	18644739	18644864	cccgggtaatctttgaaaatttcatcgtgatggggatagatcattgcaattgttggtcttcaacgaggaattcctagtaagcgcgagtcatcagctcgcgttgactatGTCCCTGCCCTTTGTACA	1	mtr-MIR2603,	mtr-MIR2603	ttggtccctgcacttttttgTTTGGTATTGGTCCCTGCACTTtgtaaaaatattggtattggttcctctgttaactttctgttaaaaaaaaaacacaaaaccaacggagtgcggcccaatcatttcacgcccacgtggcaccaatatcaatatttttacaaattgcagggacaaataccaatattttacaaagtgcagggcccaataccaatagttttgggttttttttttacagaaagttaatagagggaccaataccaatatttttacaaagtgcaaggaccaattccaaacaaaaaaaagtgtagggaccaat	mtr-MIR2603-p3	GTCCCTGCACTTtgtaaa	3'	New	gp2b	...(((((.........((((((.((((..((..(((....((.......))...)))..))))))))))))..((((.(((((((((.....))))))))).))))......)))))........	115	46	-37.6	0.6	2.5	0	2.5	0	0	3	2.5	3	0	7	12.5	0	0.940716	0	2.39479	0	0	4.00672	1.71239	1.83016	0	3.82883	4.28155	0	low
145	125	mtr-MIR2603-p3_2ss9AC17AC	GTCCCTGCCCTTTGTACA	18	unanchor1	+	527164	527289	cccgggtaatctttgaaaatttcatcgtgatggggatagatcattgcaattgttggtcttcaacgaggaattcctagtaagcgcgagtcatcagctcgcgttgactacGTCCCTGCCCTTTGTACA	1	mtr-MIR2603,	mtr-MIR2603	ttggtccctgcacttttttgTTTGGTATTGGTCCCTGCACTTtgtaaaaatattggtattggttcctctgttaactttctgttaaaaaaaaaacacaaaaccaacggagtgcggcccaatcatttcacgcccacgtggcaccaatatcaatatttttacaaattgcagggacaaataccaatattttacaaagtgcagggcccaataccaatagttttgggttttttttttacagaaagttaatagagggaccaataccaatatttttacaaagtgcaaggaccaattccaaacaaaaaaaagtgtagggaccaat	mtr-MIR2603-p3	GTCCCTGCACTTtgtaaa	3'	New	gp2b	...(((((.........((((((.((((..((..(((....((.......))...)))..))))))))))))..((((.(((((((((.....))))))))).))))......)))))........	115	46.8	-37.5	0.6	2.5	0	2.5	0	0	3	2.5	3	0	7	12.5	0	0.940716	0	2.39479	0	0	4.00672	1.71239	1.83016	0	3.82883	4.28155	0	low
146	126	mtr-MIR2625-p3_2ss14AC17TA	TTATCGTGGCACACAAAT	18	chr1	+	18463905	18463940	attccacgggagaggttaTTATCGTGGCACACAAAT	1	mtr-MIR2625,	mtr-MIR2625	aCCATCGTGCCACGTTACGATCCaatcgtgacacgatcacctcattaatcctacgtggcagcagacaaattttcatatcgtggcacgttccagactttatcgtggcacaaaatttccagtggcaaattctttgtcccacgttcaacaatcgtgccacgagatgttctaaacgtggcacgatg	mtr-MIR2625-p3	ttatcgtggcacaaaatt	3'	New	gp2b	...((((((..((.....)).)))))).........	24	44.4	-6.3	0.4	0	0	0	0	0	0	0	0	0	0	0	5	0	0	0	0	0	0	0	0	0	0	0	5.70805	low
147	127	mtr-MIR2625-p5_2ss14AC17TA	TTATCGTGGCACACAAAT	18	chr1	+	18464860	18464886	TTATCGTGGCACACAAATtgtgtgatg	1	mtr-MIR2625,	mtr-MIR2625	aCCATCGTGCCACGTTACGATCCaatcgtgacacgatcacctcattaatcctacgtggcagcagacaaattttcatatcgtggcacgttccagactttatcgtggcacaaaatttccagtggcaaattctttgtcccacgttcaacaatcgtgccacgagatgttctaaacgtggcacgatg	mtr-MIR2625-p5	ttatcgtggcacaaaatt	5'	New	gp2b	.........(((((.....)))))...	15	40.7	-6.1	0.6	0	0	0	0	0	0	0	0	0	0	0	5	0	0	0	0	0	0	0	0	0	0	0	5.70805	low
148	128	mtr-MIR2676f-p5_2ss2AT19GA	TTGGAAAATGTTTTGAGGAAA	21	chr6	+	138724353	138724398	gagggTTGGAAAATGTTTTGAGGAAAtgttgatatttacaactgtt	1	mtr-MIR2676f,	mtr-MIR2676f	ttttttattacttcatccaaacaataacatttaagaatgaaaacaattgaattgaatcatttgaattccctataattctaaattcttcaaaatttctcaattacctcatccaaacacactctaggaaaatgttttgagggaattcaaatattttggggtgaattcCATTGTTTGGATAATAATTTGaag	mtr-MIR2676f-p5	taggaaaatgttttgagggaa	5'	New	gp2b	...(((((..(((((((.............))))))).)))))...	40	32.6	-6.4	0.4	21	5	0	0	9	0	12	26	0	10	11	0	7.90202	11.8299	0	0	6.35051	0	8.21946	15.8614	0	5.46975	3.76777	0	middle
149	129	vvi-miR3630-3p_L-3R-1	GGGAATCTCTCTGATGCA	18	chr1	+	32699707	32699793	attGGGAATCTCTCTGATGCAttattgaaagctagtcaaaaaaaatcccctcagccagttttttttttttttttaaattgttcaaac	2	vvi-MIR3630,han-MIR3630,	vvi-MIR3630	cagtatggttgTGCAAGTGACGATATCAGACAgggacatcagcacctccaatggagaatgatgatttgtcTTTGGGAATCTCTCTGATGCACaagcatattg	vvi-miR3630-3p	TTTGGGAATCTCTCTGATGCAC	5'	Diff	gp2b	((..((......))..))......(((((...(((..((((((((....((.....))....))))))))..))).....)))))..	18	29.9	-7.4	0.3	2.5	0	3.5	7.5	18.5	13	2.5	0	9	6.5	0	71.5	0.940716	0	3.35271	33.9194	13.0538	17.3625	1.71239	0	43.8178	3.55534	0	81.6251	middle
150	129	vvi-miR3630-3p_L-3R-1	GGGAATCTCTCTGATGCA	18	unanchor297	+	692059	692107	aagaatgatgattagtcaaaattGGGAATCTCTCTGATGCAttattgaa	2	vvi-MIR3630,han-MIR3630,	vvi-MIR3630	cagtatggttgTGCAAGTGACGATATCAGACAgggacatcagcacctccaatggagaatgatgatttgtcTTTGGGAATCTCTCTGATGCACaagcatattg	vvi-miR3630-3p	TTTGGGAATCTCTCTGATGCAC	3'	Diff	gp2b	...((((((((((((........(((....)))))))).)))))))...	43	30.6	-7.8	0.5	2.5	0	3.5	7.5	18.5	13	2.5	0	9	6.5	0	71.5	0.940716	0	3.35271	33.9194	13.0538	17.3625	1.71239	0	43.8178	3.55534	0	81.6251	middle
151	130	vvi-miR3630-3p_L-2R-1_1ss20CT	TGGGAATCTCTCTGATGTA	19	chr1	+	89811866	89811905	aatgatgactagtcaaaatTGGGAATCTCTCTGATGTAgt	2	vvi-MIR3630,han-MIR3630,	vvi-MIR3630	cagtatggttgTGCAAGTGACGATATCAGACAgggacatcagcacctccaatggagaatgatgatttgtcTTTGGGAATCTCTCTGATGCACaagcatattg	vvi-miR3630-3p	TTTGGGAATCTCTCTGATGCAC	3'	Diff	gp2b	..((((.....))))..((..((......))..)).....	18	35	-5.4	0.4	2.5	0	20	17	61	19	0	9.5	32.5	23.5	20.5	1307	0.940716	0	19.1583	76.884	43.0423	25.3759	0	5.79551	158.231	12.8539	7.02174	1492.08	high
152	130	vvi-miR3630-3p_L-2R-1_1ss20CT	TGGGAATCTCTCTGATGTA	19	chr7	-	16747327	16747375	aagaatgatgattagtcaagatTGGGAATCTCTCTGATGCAttattgaa	2	vvi-MIR3630,han-MIR3630,	vvi-MIR3630	cagtatggttgTGCAAGTGACGATATCAGACAgggacatcagcacctccaatggagaatgatgatttgtcTTTGGGAATCTCTCTGATGCACaagcatattg	vvi-miR3630-3p	TTTGGGAATCTCTCTGATGCAC	3'	Diff	gp2b	...((((((((((((...(((((...)))))..))))).)))))))...	43	32.7	-10.3	0.6	2.5	0	20	17	61	19	0	9.5	32.5	23.5	20.5	1307	0.940716	0	19.1583	76.884	43.0423	25.3759	0	5.79551	158.231	12.8539	7.02174	1492.08	high
153	131	vvi-miR3630-3p_L-4	GGAATCTCTCTGATGCAC	18	chr1	-	67037333	67037447	ccgtcccacactttgacccaaattcttttttttttaaaaatcccctcagaaactcatgtcttgtcttgagttaagaatgatgattagtcaaaattgGGAATCTCTCTGATGCATt	2	vvi-MIR3630,han-MIR3630,	vvi-MIR3630	cagtatggttgTGCAAGTGACGATATCAGACAgggacatcagcacctccaatggagaatgatgatttgtcTTTGGGAATCTCTCTGATGCACaagcatattg	vvi-miR3630-3p	TTTGGGAATCTCTCTGATGCAC	3'	Diff	gp2b	...(((((...((((((.((.((((((((((....)))))..........((((((..........)))))).)))))..))....))))))..)))))................	96	35.7	-17.6	0.4	3	4.5	4.5	19.5	98	40	0	5.5	53	11	10.5	936	1.12886	10.6469	4.31062	88.1904	69.15	53.423	0	3.35529	258.038	6.01673	3.5965	1068.55	high
154	131	vvi-miR3630-3p_L-4	GGAATCTCTCTGATGCAC	18	chr2	+	402385671	402385764	gaagtagcaggtgatgaggaaatagacagggacatcagcaactcagttccatgagaatgatgactagtctaaatgGGAATCTCTCTGATGCACa	1	vvi-MIR3630,	vvi-MIR3630	cagtatggttgTGCAAGTGACGATATCAGACAgggacatcagcacctccaatggagaatgatgatttgtcTTTGGGAATCTCTCTGATGCACaagcatattg	vvi-miR3630-3p	TTTGGGAATCTCTCTGATGCAC	3'	Diff	gp2b	...(((.((((.(((.......(((((..(..(((((....((((......))))..))))).)..))))).......))).).))).)))...	88	43.6	-23.2	0.6	3	4.5	4.5	19.5	98	40	0	5.5	53	11	10.5	936	1.12886	10.6469	4.31062	88.1904	69.15	53.423	0	3.35529	258.038	6.01673	3.5965	1068.55	high
155	132	vvi-miR3630-3p_L-3	GGGAATCTCTCTGATGCAC	19	chr2	-	192630717	192630765	aagaatgatgattagtcaaaattGGGAATCTCTCTGATGCATtattgaa	2	vvi-MIR3630,han-MIR3630,	vvi-MIR3630	cagtatggttgTGCAAGTGACGATATCAGACAgggacatcagcacctccaatggagaatgatgatttgtcTTTGGGAATCTCTCTGATGCACaagcatattg	vvi-miR3630-3p	TTTGGGAATCTCTCTGATGCAC	3'	Diff	gp2b	...((((((((((((........(((....)))))))).)))))))...	43	30.6	-7.8	0.5	4	0	6.5	13	54	16.5	0	8.5	24	15	12	547	1.50515	0	6.22645	58.7936	38.1031	22.037	0	5.18545	116.847	8.20463	4.11029	624.461	high
156	133	vvi-miR3630-3p_L-2	TGGGAATCTCTCTGATGCAC	20	chr2	-	362509784	362509846	ttaagaatgatgattagtcaaaatTGGGAATCTCTCTGATGCATtattgaaattcattttatt	2	vvi-MIR3630,han-MIR3630,	vvi-MIR3630	cagtatggttgTGCAAGTGACGATATCAGACAgggacatcagcacctccaatggagaatgatgatttgtcTTTGGGAATCTCTCTGATGCACaagcatattg	vvi-miR3630-3p	TTTGGGAATCTCTCTGATGCAC	3'	Diff	gp2b	...(((((((...(((((....((..((......))..)).....)))))...)))))))...	57	25.4	-10.7	0.7	8	0	11	10.5	31	11	5.5	6.5	17	16	16.5	531	3.01029	0	10.5371	47.4872	21.874	14.6913	3.76725	3.96535	82.767	8.7516	5.65165	606.195	high
157	134	vvi-miR3630-3p_L-1R-1_1ss20CT	TTGGGAATCTCTCTGATGTA	20	chr3	-	289171921	289172035	ccgtcccacactttgacccaaattcttttttttttaaaaatccccttagaaaatcatgtcttgtcttgagttaagaatgatgattagtcaaaaTTGGGAATCTCTCTGATGCAtt	2	vvi-MIR3630,han-MIR3630,	vvi-MIR3630	cagtatggttgTGCAAGTGACGATATCAGACAgggacatcagcacctccaatggagaatgatgatttgtcTTTGGGAATCTCTCTGATGCACaagcatattg	vvi-miR3630-3p	TTTGGGAATCTCTCTGATGCAC	3'	Diff	gp2b	...(((((...((((((.............(((((((........)))))))(((((.(((((........)))))))))).....))))))..)))))................	96	33.9	-19	0.5	0	0	3.5	0	6.5	0	0	0	5	0	5.5	92	0	0	3.35271	0	4.58648	0	0	0	24.3432	0	1.88388	105.028	middle
158	135	vvi-miR3630-3p_L-2_1ss22CT	TGGGAATCTCTCTGATGCAT	20	chr6	+	37644497	37644545	aagaatgatgattagtcaaaatTGGGAATCTCTCTGATGCATtattgaa	2	vvi-MIR3630,han-MIR3630,	vvi-MIR3630	cagtatggttgTGCAAGTGACGATATCAGACAgggacatcagcacctccaatggagaatgatgatttgtcTTTGGGAATCTCTCTGATGCACaagcatattg	vvi-miR3630-3p	TTTGGGAATCTCTCTGATGCAC	3'	Diff	gp2b	...((((((((((((........(((....)))))))).)))))))...	43	30.6	-7.8	0.5	7	0	7	27	93.5	42	0	3	44	23.5	15	696.5	2.63401	0	6.70541	122.11	65.9747	56.0941	0	1.83016	214.22	12.8539	5.13786	795.131	high
159	135	vvi-miR3630-3p_L-2_1ss22CT	TGGGAATCTCTCTGATGCAT	20	unanchor630	+	305396	305447	tgatgattagtcaaaaaTGGGAATCTCTCTGATGCATtattgaaagtcagtc	2	vvi-MIR3630,han-MIR3630,	vvi-MIR3630	cagtatggttgTGCAAGTGACGATATCAGACAgggacatcagcacctccaatggagaatgatgatttgtcTTTGGGAATCTCTCTGATGCACaagcatattg	vvi-miR3630-3p	TTTGGGAATCTCTCTGATGCAC	3'	Diff	gp2b	...(((((..((((.((((...(((.....))).)))).)))).)))))...	46	34.6	-8	0.4	7	0	7	27	93.5	42	0	3	44	23.5	15	696.5	2.63401	0	6.70541	122.11	65.9747	56.0941	0	1.83016	214.22	12.8539	5.13786	795.131	high
160	136	vvi-miR3630-3p_L-3_1ss22CT	GGGAATCTCTCTGATGCAT	19	chr7	+	216314240	216314288	aagaatgatgattagtcaaaattGGGAATCTCTCTGATGCATtattgaa	2	vvi-MIR3630,han-MIR3630,	vvi-MIR3630	cagtatggttgTGCAAGTGACGATATCAGACAgggacatcagcacctccaatggagaatgatgatttgtcTTTGGGAATCTCTCTGATGCACaagcatattg	vvi-miR3630-3p	TTTGGGAATCTCTCTGATGCAC	3'	Diff	gp2b	...((((((((((((........(((....)))))))).)))))))...	43	30.6	-7.8	0.5	2.5	0	6.5	14.5	69.5	33.5	0	3	27	23.5	17	465	0.940716	0	6.22645	65.5775	49.04	44.7417	0	1.83016	131.453	12.8539	5.82291	530.849	middle
161	137	gma-miR4995_L-2R-1	GCAGTGGCTTGGTTAAGG	18	chr1	+	301941085	301941173	gactcatagGCAGTGGCTTGGTTAAGGgaacccaccggagccgtagcgAAAGCGAGTCTTCATAGGgcggttgtcactgcttatggacc	2	gma-MIR4995,ath-MIR406,	gma-MIR4995	taaaactcatAGGCAGTGGCTTGGTTAAGGGaagccactggagccgtagtaaaagcaagtcttcaccgggcaattgtttatggacccgaa	gma-miR4995	AGGCAGTGGCTTGGTTAAGGG	5'	Diff	gp2b	...((((((((((((((..((((..((.......))..))))...((....))..((((.....))))....))))))))))))))...	83	56.2	-36.7	0.7	35	2.5	0	0	0	0	22.5	84.5	59	0	0	0	13.17	5.91497	0	0	0	0	15.4115	51.5495	287.25	0	0	0	middle
161	138	ath-MIR406-p3_2ss4AG18TG	AAAGCGAGTCTTCATAGG	18	chr1	+	301941085	301941173	gactcatagGCAGTGGCTTGGTTAAGGgaacccaccggagccgtagcgAAAGCGAGTCTTCATAGGgcggttgtcactgcttatggacc	2	gma-MIR4995,ath-MIR406,	ath-MIR406	taaagtcttaatttttagttatcacgatttagcacatatcaatctatagatttgatttttcttttattagttcttaaattttgatttgagacagtaactattcaaaTAGAATGCTATTGTAATCCAGaatccgaaagaaacgaatcaaaaaaaaaaaaaacgagtcttcatagtaaaaatcgattaactaaaaaggatgg	ath-MIR406-p3	aaaacgagtcttcatagt	3'	New	gp2b	...((((((((((((((..((((..((.......))..))))...((....))..((((.....))))....))))))))))))))...	83	56.2	-36.7	0.7	0	0	0	0	0	0	4.5	6	0	0	0	0	0	0	0	0	0	0	3.0823	3.66032	0	0	0	0	low
162	139	gma-miR4995_R-2	AGGCAGTGGCTTGGTTAAG	19	chr8	+	200090189	200090277	gactcatAGGCAGTGGCTTGGTTAAGggaacccaccggagccgtagcgAAAGCGAGTCTTCATAGGgcggttgtcactgcttatggacc	2	gma-MIR4995,ath-MIR406,	gma-MIR4995	taaaactcatAGGCAGTGGCTTGGTTAAGGGaagccactggagccgtagtaaaagcaagtcttcaccgggcaattgtttatggacccgaa	gma-miR4995	AGGCAGTGGCTTGGTTAAGGG	5'	Diff	gp2b	...((((((((((((((..((((..((.......))..))))...((....))..((((.....))))....))))))))))))))...	83	56.2	-36.7	0.7	44.5	5.5	3	0	0	0	39.5	124	56.5	0	0	0	16.7447	13.0129	2.87375	0	0	0	27.0557	75.6466	275.078	0	0	0	middle
162	138	ath-MIR406-p3_2ss4AG18TG	AAAGCGAGTCTTCATAGG	18	chr8	+	200090189	200090277	gactcatAGGCAGTGGCTTGGTTAAGggaacccaccggagccgtagcgAAAGCGAGTCTTCATAGGgcggttgtcactgcttatggacc	2	gma-MIR4995,ath-MIR406,	ath-MIR406	taaagtcttaatttttagttatcacgatttagcacatatcaatctatagatttgatttttcttttattagttcttaaattttgatttgagacagtaactattcaaaTAGAATGCTATTGTAATCCAGaatccgaaagaaacgaatcaaaaaaaaaaaaaacgagtcttcatagtaaaaatcgattaactaaaaaggatgg	ath-MIR406-p3	aaaacgagtcttcatagt	3'	New	gp2b	...((((((((((((((..((((..((.......))..))))...((....))..((((.....))))....))))))))))))))...	83	56.2	-36.7	0.7	0	0	0	0	0	0	4.5	6	0	0	0	0	0	0	0	0	0	0	3.0823	3.66032	0	0	0	0	low
163	140	gma-miR4995_L-1R-2	GGCAGTGGCTTGGTTAAG	18	chr11	+	112170193	112170242	gactcataGGCAGTGGCTTGGTTAAGGGAACCCACCGGAgccgtagcgaa	1	gma-MIR4995,	gma-MIR4995	taaaactcatAGGCAGTGGCTTGGTTAAGGGaagccactggagccgtagtaaaagcaagtcttcaccgggcaattgtttatggacccgaa	gma-miR4995	AGGCAGTGGCTTGGTTAAGGG	5'	Diff	gp2b	.........((..(((((((((...((....))))).))))))..))...	38	58	-16	0.6	25.5	13	3	0	0	0	126.5	219.5	71	0	0	0	9.59531	30.7578	2.87375	0	0	0	86.6468	133.907	345.674	0	0	0	middle
163	141	gma-MIR4995-p3_2ss14GC19TC_1	TTGGTTAAGGGAACCCACCGGA	22	chr11	+	112170193	112170242	gactcataGGCAGTGGCTTGGTTAAGGGAACCCACCGGAgccgtagcgaa	1	gma-MIR4995,	gma-MIR4995	taaaactcatAGGCAGTGGCTTGGTTAAGGGaagccactggagccgtagtaaaagcaagtcttcaccgggcaattgtttatggacccgaa	gma-MIR4995-p3	TTGGTTAAGGGaagccactgga	3'	New	gp2b	.........((..(((((((((...((....))))).))))))..))...	38	58	-16	0.6	12.5	0	0	0	0	0	0	19.5	0	0	0	0	4.70358	0	0	0	0	0	0	11.896	0	0	0	0	middle
164	140	gma-miR4995_L-1R-2	GGCAGTGGCTTGGTTAAG	18	chr8	+	157716465	157716535	tgaccgcgtgcctgttgaagaatgagccaacgactcataGGCAGTGGCTTGGTTAAGggaacccaccggag	1	gma-MIR4995,	gma-MIR4995	taaaactcatAGGCAGTGGCTTGGTTAAGGGaagccactggagccgtagtaaaagcaagtcttcaccgggcaattgtttatggacccgaa	gma-miR4995	AGGCAGTGGCTTGGTTAAGGG	3'	Diff	gp2b	...((((.(((((........(((((.......))))))))))))))...(((...((....)))))....	44	56.3	-18.8	0.5	25.5	13	3	0	0	0	126.5	219.5	71	0	0	0	9.59531	30.7578	2.87375	0	0	0	86.6468	133.907	345.674	0	0	0	middle
165	142	gma-miR4995_L-2	GCAGTGGCTTGGTTAAGGG	19	chr8	+	157586126	157586192	ccaaagactcatagGCAGTGGCTTGGTTAAGGGAACCCACCGGAGCcgtagcgaagtgagtcttcat	1	gma-MIR4995,	gma-MIR4995	taaaactcatAGGCAGTGGCTTGGTTAAGGGaagccactggagccgtagtaaaagcaagtcttcaccgggcaattgtttatggacccgaa	gma-miR4995	AGGCAGTGGCTTGGTTAAGGG	5'	Diff	gp2b	...(((((((((..((..(((((((((...((....))))).))))))..))...)))))))))...	61	53.7	-27.1	0.8	21	0	0	0	0	0	13.5	52.5	4.5	0	0	0	7.90202	0	0	0	0	0	9.24689	32.0278	21.9089	0	0	0	middle
165	143	gma-MIR4995-p3_2ss14GC19TC_2	TTGGTTAAGGGAACCCACCGGAGC	24	chr8	+	157586126	157586192	ccaaagactcatagGCAGTGGCTTGGTTAAGGGAACCCACCGGAGCcgtagcgaagtgagtcttcat	1	gma-MIR4995,	gma-MIR4995	taaaactcatAGGCAGTGGCTTGGTTAAGGGaagccactggagccgtagtaaaagcaagtcttcaccgggcaattgtttatggacccgaa	gma-MIR4995-p3	TTGGTTAAGGGaagccactggagc	3'	New	gp2b	...(((((((((..((..(((((((((...((....))))).))))))..))...)))))))))...	61	53.7	-27.1	0.8	12.5	0	0	0	0	0	0	19.5	0	0	0	0	4.70358	0	0	0	0	0	0	11.896	0	0	0	0	middle
166	144	gma-MIR4995-p5_1ss18GC	TGGCTTGGTTAAGGGAAC	18	chr8	+	179897314	179897336	AGTGGCTTGGTTAAGGGAACCCA	1	gma-MIR4995,	gma-MIR4995	taaaactcatAGGCAGTGGCTTGGTTAAGGGaagccactggagccgtagtaaaagcaagtcttcaccgggcaattgtttatggacccgaa	gma-MIR4995-p5	TGGCTTGGTTAAGGGaag	5'	New	gp2b	..............((....)).	8	52.2	-2.3	0.2	17.5	0	0	0	0	0	2.5	24.5	0	0	0	0	6.58501	0	0	0	0	0	1.71239	14.9463	0	0	0	0	middle
166	145	gma-MIR4995-p3_1ss20GC	AGTGGCTTGGTTAAGGGAACCCA	23	chr8	+	179897314	179897336	AGTGGCTTGGTTAAGGGAACCCA	1	gma-MIR4995,	gma-MIR4995	taaaactcatAGGCAGTGGCTTGGTTAAGGGaagccactggagccgtagtaaaagcaagtcttcaccgggcaattgtttatggacccgaa	gma-MIR4995-p3	AGTGGCTTGGTTAAGGGaagcca	3'	New	gp2b	..............((....)).	8	52.2	-2.3	0.2	0	0	0	0	0	0	0	10	0	0	0	0	0	0	0	0	0	0	0	6.10053	0	0	0	0	low
167	146	gma-MIR4995-p3_1ss21GC	CAGTGGCTTGGTTAAGGGAACC	22	chr1	+	307594472	307594573	tcccaagcagtgggaggagaatatgatctctgaccgcgtgcctgttgaagaatgagccgacgactcataggCAGTGGCTTGGTTAAGGGAACCcaccggagc	1	gma-MIR4995,	gma-MIR4995	taaaactcatAGGCAGTGGCTTGGTTAAGGGaagccactggagccgtagtaaaagcaagtcttcaccgggcaattgtttatggacccgaa	gma-MIR4995-p3	CAGTGGCTTGGTTAAGGGaagc	3'	New	gp2b	..((((((.((((..(((((......)))))..)))).(((((........(((((.......))))))))))...))))))....((....))........	80	55.9	-34.3	0.6	47.5	0	0	0	0	0	6.5	95.5	8	0	0	0	17.8736	0	0	0	0	0	4.45221	58.2601	38.9492	0	0	0	middle
168	147	gma-miR4995_L-1R-1	GGCAGTGGCTTGGTTAAGG	19	chr2	+	57126272	57126347	gagccggcgactcataGGCAGTGGCTTGGTTAAGGgaacccaaatcggattgagaaactgtatgatgttccggata	1	gma-MIR4995,	gma-MIR4995	taaaactcatAGGCAGTGGCTTGGTTAAGGGaagccactggagccgtagtaaaagcaagtcttcaccgggcaattgtttatggacccgaa	gma-miR4995	AGGCAGTGGCTTGGTTAAGGG	5'	Diff	gp2b	...((((.(((((((..(((((..((..(((..((....))......)))..))..))))))))).)))))))...	70	50	-25.2	0.7	28	6	0	0	0	0	35.5	101	29	0	3	0	10.536	14.1959	0	0	0	0	24.3159	61.6154	141.191	0	1.02757	0	middle
169	147	gma-miR4995_L-1R-1	GGCAGTGGCTTGGTTAAGG	19	chr8	+	196363320	196363359	ataGGCAGTGGCTTGGTTAAGGgaacccaccagagccgta	1	gma-MIR4995,	gma-MIR4995	taaaactcatAGGCAGTGGCTTGGTTAAGGGaagccactggagccgtagtaaaagcaagtcttcaccgggcaattgtttatggacccgaa	gma-miR4995	AGGCAGTGGCTTGGTTAAGGG	5'	Diff	gp2b	.........((((((((...((....)))))).))))...	28	55	-12.1	0.5	28	6	0	0	0	0	35.5	101	29	0	3	0	10.536	14.1959	0	0	0	0	24.3159	61.6154	141.191	0	1.02757	0	middle
170	148	gma-MIR4995-p5_2ss13GC18TC	TGGTTAAGGGAACCCACCGGAGC	23	chr2	+	97112933	97113078	gctTGGTTAAGGGAACCCACCGGAGCcgtagcgaaagcgagtcttcatagggcggtaaaaatggggttaaatcggaaccgtccaagcctggggacaaaatggtaattttacctataagcgggtctgaagttggtactgggtcttct	1	gma-MIR4995,	gma-MIR4995	taaaactcatAGGCAGTGGCTTGGTTAAGGGaagccactggagccgtagtaaaagcaagtcttcaccgggcaattgtttatggacccgaa	gma-MIR4995-p5	TGGTTAAGGGaagccactggagc	5'	New	gp2b	(((..((...((....))..((((.((((.((....))..(((..((..(((((((.......((......))...))))))).....))..))).....((((....)))).....)))).))))........))..))).....	106	50	-44.4	0.6	5.5	0	0	0	0	0	0	5.5	0	0	0	0	2.06958	0	0	0	0	0	0	3.35529	0	0	0	0	low
171	149	gma-MIR4995-p3	TCATAGGCAGTGGCTTGGT	19	chr2	+	129699332	129699379	gcgtgcctgttgaagaatgagtcggggacTCATAGGCAGTGGCTTGGT	1	gma-MIR4995,	gma-MIR4995	taaaactcatAGGCAGTGGCTTGGTTAAGGGaagccactggagccgtagtaaaagcaagtcttcaccgggcaattgtttatggacccgaa	gma-MIR4995-p3	tcatAGGCAGTGGCTTGGT	3'	New	gp2b	((.(((((........(((((((...))))))))))))...)).....	43	56.2	-13	0.5	7.5	0	0	0	0	0	5	18	0	0	0	0	2.82215	0	0	0	0	0	3.42477	10.981	0	0	0	0	middle
172	150	gma-MIR4995-p5_1ss20GC_1	AGTGGCTTGGTTAAGGGAAC	20	chr5	+	49999899	49999970	AGTGGCTTGGTTAAGGGAACctccattcaccccaaaccacatgagttactactggaaattctcctaacccaa	1	gma-MIR4995,	gma-MIR4995	taaaactcatAGGCAGTGGCTTGGTTAAGGGaagccactggagccgtagtaaaagcaagtcttcaccgggcaattgtttatggacccgaa	gma-MIR4995-p5	AGTGGCTTGGTTAAGGGaag	5'	New	gp2b	.((((.((((....(((....))).......)))).)))).((.((((.....(((.....))))))).)).	39	45.8	-14.9	0.5	6.5	0	0	0	0	0	2.5	9.5	0	0	0	0	2.44586	0	0	0	0	0	1.71239	5.79551	0	0	0	0	low
173	150	gma-MIR4995-p5_1ss20GC_1	AGTGGCTTGGTTAAGGGAAC	20	unanchor385	+	231829	231898	gccggcgactcataggtAGTGGCTTGGTTAAGGGAACctccattcaccccaaacctcatgagttgctact	1	gma-MIR4995,	gma-MIR4995	taaaactcatAGGCAGTGGCTTGGTTAAGGGaagccactggagccgtagtaaaagcaagtcttcaccgggcaattgtttatggacccgaa	gma-MIR4995-p5	AGTGGCTTGGTTAAGGGaag	5'	New	gp2b	...((((((((((((((..(((...(((.(((((....))).)).)))))).)))).))))))))))...	64	52.9	-27.5	0.7	6.5	0	0	0	0	0	2.5	9.5	0	0	0	0	2.44586	0	0	0	0	0	1.71239	5.79551	0	0	0	0	low
174	151	gma-MIR4995-p5_1ss20GC_2	AGTGGCTTGGTTAAGGGAACCC	22	chr5	+	58107681	58107714	AGTGGCTTGGTTAAGGGAACCCcccgaagccgta	1	gma-MIR4995,	gma-MIR4995	taaaactcatAGGCAGTGGCTTGGTTAAGGGaagccactggagccgtagtaaaagcaagtcttcaccgggcaattgtttatggacccgaa	gma-MIR4995-p5	AGTGGCTTGGTTAAGGGaagcc	5'	New	gp2b	...(((((((....(((...))))).)))))...	28	58.8	-10.3	0.5	6.5	0	0	0	0	0	2.5	9.5	0	0	0	0	2.44586	0	0	0	0	0	1.71239	5.79551	0	0	0	0	low
175	152	gma-MIR4995-p3_1ss18GC	TGGCTTGGTTAAGGGAACCC	20	chr6	+	97705700	97705743	catttcccaaaaaactattttacaTGGCTTGGTTAAGGGAACCC	1	gma-MIR4995,	gma-MIR4995	taaaactcatAGGCAGTGGCTTGGTTAAGGGaagccactggagccgtagtaaaagcaagtcttcaccgggcaattgtttatggacccgaa	gma-MIR4995-p3	TGGCTTGGTTAAGGGaagcc	3'	New	gp2b	...(((((....(((((............)))))..)))))...	38	38.6	-7	0.4	4.5	0	0	0	0	0	0	5.5	0	0	0	0	1.69329	0	0	0	0	0	0	3.35529	0	0	0	0	low
176	153	gma-miR4995_R-1	AGGCAGTGGCTTGGTTAAGG	20	chr8	+	236463745	236463831	actcatAGGCAGTGGCTTGGTTAAGGgaacccaccggagccgtagcgaaagcaagtcttcatggggcggttgtcactgcttatggac	1	gma-MIR4995,	gma-MIR4995	taaaactcatAGGCAGTGGCTTGGTTAAGGGaagccactggagccgtagtaaaagcaagtcttcaccgggcaattgtttatggacccgaa	gma-miR4995	AGGCAGTGGCTTGGTTAAGGG	5'	Diff	gp2b	..((((((((((((((..((((..((.......))..))))...((....))..((((.....))))....))))))))))))))..	83	55.2	-36.7	0.8	51	2.5	0	0	0	0	37	157.5	78.5	0	0	0	19.1906	5.91497	0	0	0	0	25.3433	96.0834	382.189	0	0	0	middle
177	154	osa-miR5072_L-4_1ss13GA	TCCCCAGCAGAGTCGCCA	18	chr2	+	107738273	107738400	tTCCCCAGCAGAGTCGCCAtgaactcgccatgaaattggagatgggttctgagatacacaggggagagggagagatgatgatagggagagagaaagacagggaagagagaggtgatggagatgggagg	1	osa-MIR5072,	osa-MIR5072	gctgaatagatCGATTCCCCAGCGGAGTCGCCAaaaatcgtgttggcaacttttttgacaagtcgacaagcacgat	osa-miR5072	CGATTCCCCAGCGGAGTCGCCA	5'	Diff	gp2b	...((((.....((((((..((((((((((......)))...))))))).......((((...............)).))..............................)))))).....))))...	122	52.3	-23.6	0.4	25	5.5	22.5	8.5	43.5	9.5	31.5	34	21.5	31.5	71	19	9.40716	13.0129	21.5531	38.442	30.6941	12.688	21.5761	20.7418	104.676	17.2297	24.3192	21.6906	middle
178	154	osa-miR5072_L-4_1ss13GA	TCCCCAGCAGAGTCGCCA	18	chr4	+	26342527	26342622	tcgtTCCCCAGCAGAGTCGCCAtgaactcgccatgaaattggagatgggttctgagatacacaggggagagggagagagatgatgacggggagaga	1	osa-MIR5072,	osa-MIR5072	gctgaatagatCGATTCCCCAGCGGAGTCGCCAaaaatcgtgttggcaacttttttgacaagtcgacaagcacgat	osa-miR5072	CGATTCCCCAGCGGAGTCGCCA	5'	Diff	gp2b	...((((((..((..(((........(((.((.((..(((..(((.....)))..)))...))..)).))).......)))..))..))))))...	90	54.2	-23.9	0.5	25	5.5	22.5	8.5	43.5	9.5	31.5	34	21.5	31.5	71	19	9.40716	13.0129	21.5531	38.442	30.6941	12.688	21.5761	20.7418	104.676	17.2297	24.3192	21.6906	middle
179	155	osa-miR5072_L-3	TTCCCCAGCGGAGTCGCCA	19	chr2	-	417457175	417457314	ttcgTTCCCCAGCAGAGTCGCCAtgaactcgccatgaaattggagatgggttctgagatacacaggggagagggagagagatgatgacgaggagagagaaagacagggaagagagaaaggtgatggagatgggaggctgg	1	osa-MIR5072,	osa-MIR5072	gctgaatagatCGATTCCCCAGCGGAGTCGCCAaaaatcgtgttggcaacttttttgacaagtcgacaagcacgat	osa-miR5072	CGATTCCCCAGCGGAGTCGCCA	5'	Diff	gp2b	...((..((((.....((((((..((((((((((......)))...))))))).......((((.................)).))................................)))))).....))))..))...	134	52.9	-26.8	0.4	0	0	6	0	3	0	0	9	0	4	21.5	0	0	0	5.7475	0	2.11684	0	0	5.49048	0	2.1879	7.36427	0	low
180	155	osa-miR5072_L-3	TTCCCCAGCGGAGTCGCCA	19	chr9	-	213604425	213604520	ttgTTCCCCAGCAGAGTCGCCAtgaactcgccatgaaattggagatgggttctgagatacacaggggagagggagagagatgatgacggggagaga	1	osa-MIR5072,	osa-MIR5072	gctgaatagatCGATTCCCCAGCGGAGTCGCCAaaaatcgtgttggcaacttttttgacaagtcgacaagcacgat	osa-miR5072	CGATTCCCCAGCGGAGTCGCCA	5'	Diff	gp2b	...((((((..((..(((........(((.((.((..(((..(((.....)))..)))...))..)).))).......)))..))..))))))...	90	53.1	-23.9	0.5	0	0	6	0	3	0	0	9	0	4	21.5	0	0	0	5.7475	0	2.11684	0	0	5.49048	0	2.1879	7.36427	0	low
181	156	osa-miR5072_L-4	TCCCCAGCGGAGTCGCCA	18	chr6	-	228303393	228303428	aggcgctggtctactcaaTCCCCAGCGGAGTCGCCC	1	osa-MIR5072,	osa-MIR5072	gctgaatagatCGATTCCCCAGCGGAGTCGCCAaaaatcgtgttggcaacttttttgacaagtcgacaagcacgat	osa-miR5072	CGATTCCCCAGCGGAGTCGCCA	3'	Diff	gp2b	...((((((............)))))).........	24	66.7	-9	0.4	81.5	19	60	18.5	88	23	83	107	70.5	92.5	210	70.5	30.6674	44.9537	57.475	83.6678	62.0939	30.7182	56.8512	65.2757	343.24	50.5952	71.9301	80.4835	middle
182	156	osa-miR5072_L-4	TCCCCAGCGGAGTCGCCA	18	chr9	-	46912088	46912199	ataccgagtgcacaccatggctttatatatatatatatatatatatatatatatatatatatatatatatatatatatactacaagctataatgTCCCCAGCGGAGTCGCCA	1	osa-MIR5072,	osa-MIR5072	gctgaatagatCGATTCCCCAGCGGAGTCGCCAaaaatcgtgttggcaacttttttgacaagtcgacaagcacgat	osa-miR5072	CGATTCCCCAGCGGAGTCGCCA	3'	Diff	gp2b	...(((.....(((..(((((((((((((((((((((((((((((((((....))))))))))))))))))))))))))....)))))))..)))......)))........	101	26.8	-36.7	1.2	81.5	19	60	18.5	88	23	83	107	70.5	92.5	210	70.5	30.6674	44.9537	57.475	83.6678	62.0939	30.7182	56.8512	65.2757	343.24	50.5952	71.9301	80.4835	middle
183	157	osa-miR5072_L-3_1ss4TA	ATCCCCAGCGGAGTCGCCA	19	chr9	+	99995373	99995405	ATCCCCAGCGGAGTCACCActgacccctggacc	1	osa-MIR5072,	osa-MIR5072	gctgaatagatCGATTCCCCAGCGGAGTCGCCAaaaatcgtgttggcaacttttttgacaagtcgacaagcacgat	osa-miR5072	CGATTCCCCAGCGGAGTCGCCA	5'	Diff	gp2b	....((((.((.((((....))))))))))...	26	66.7	-12.6	0.6	20.5	6.5	19	3.5	14.5	2.5	13.5	28	6	15.5	39	2.5	7.71387	15.3789	18.2004	15.8291	10.2314	3.33893	9.24689	17.0815	29.2119	8.47812	13.3584	2.85402	middle
184	158	osa-MIR5076-p3_2ss16GC17TC	TGTAAGAAGAGTAGACCTTGA	21	chr9	-	100402662	100402732	ttcgtcttaaggtctctatctataagttttgagcgacactgctcaTGTAAGAAGAGTAGACCTTGAgctat	1	osa-MIR5076,	osa-MIR5076	catctgatcccagccttctattgctttattttcagtcaattcatctacttgtgtaagaagagtagagtttgagtatctagcagggttgagtatacatttgccaaataattttgctgttattgaacttatctatatttatactatgccaatgaattcgaatttttgaccttttctctccagcatgactctcttgactcGAAATGGGAGCAGAGCAGGTTTgaaaaaagat	osa-MIR5076-p3	tgtaagaagagtagagtttga	3'	New	gp2b	...(.((((((((((...(((........((((((....)))))).......)))..)))))))))))...	65	39.4	-22.4	0.8	53	5	8	0	7	0	23	90	0	15	41	13	19.9432	11.8299	7.66333	0	4.93928	0	15.754	54.9048	0	8.20463	14.0435	14.8409	middle
185	159	osa-miR5077_L-1_1ss5GA	TTCACGTCGGGTTCACCA	18	chr5	+	115345018	115345162	agcggatagaatggagagctaacttggagcacccaggacgatggtcatggacaaaactaatacaaccaaaattttaggaggaatgggaagagtagttactgtcacaacggagttatcaTTCACGTCGGGTTCACCActattcact	1	osa-MIR5077,	osa-MIR5077	tgccttttcgttGTTCGCGTCGGGTTCACCAgctaggtggttcgccatgaagtacaggaagggggtcgccggcgagtccaacgatgacgac	osa-miR5077	GTTCGCGTCGGGTTCACCA	3'	Diff	gp2b	((.((((((..(((.((((...(((((.....))))).(((((....((((((.(((((......(((...............)))......)))))..)))).))...((((....)))).))))).)))).))))))))).))	145	44.1	-33.4	0.5	313.5	53.5	129.5	107.5	826	116	255.5	393.5	634.5	356.5	824.5	930	117.966	126.58	124.05	486.178	582.836	154.927	175.006	240.056	3089.16	194.997	282.411	1061.7	high
186	159	osa-miR5077_L-1_1ss5GA	TTCACGTCGGGTTCACCA	18	chr6	+	279305496	279305528	acaccggagttatcaTTCACGTCGGGTTCACCA	1	osa-MIR5077,	osa-MIR5077	tgccttttcgttGTTCGCGTCGGGTTCACCAgctaggtggttcgccatgaagtacaggaagggggtcgccggcgagtccaacgatgacgac	osa-miR5077	GTTCGCGTCGGGTTCACCA	3'	Diff	gp2b	...(((..((........))..)))........	22	51.5	-5.3	0.3	313.5	53.5	129.5	107.5	826	116	255.5	393.5	634.5	356.5	824.5	930	117.966	126.58	124.05	486.178	582.836	154.927	175.006	240.056	3089.16	194.997	282.411	1061.7	high
187	160	osa-MIR5079a-p3_2ss6GT19TC_1	TCAAATGGTTCTCAAAAACTC	21	chr1	+	360323934	360323988	cccagttttcgagaaccattcgaatacccgatTCAAATGGTTCTCAAAAACTCgc	2	osa-MIR5079a,osa-MIR5079b,	osa-MIR5079a	tttcttataaTTTGGATCTGTTATTTTGGTATcaatctattaggaataggtttacatagttatggttcatttacattacccatctaaatgattacataacataaaaccttaatgaaatggaaaaaacttccatttttgtgtttgatttgagaaccccttgaacgccttctcaaagggttctcaaaaattcgagatagatctaattagactcttttacttttttctgaattttttagtatttccactatggaatatagagcggactagtagaagaaaaaaaatcctatttaggataataattggataacagagcctctaccctgtcaacggatagcgagagaacaaaatctggataaataccgattcctattactggtaaaaagatacagattaaaagaa…	osa-MIR5079a-p3	tcaaagggttctcaaaaattc	3'	New	gp2b	...((((((.((((((((((.((((.....)))).)))))))))).))))))...	49	43.6	-21.7	0.9	0	2.5	0	0	0	0	0	0	5.5	0	0	0	0	5.91497	0	0	0	0	0	0	26.7776	0	0	0	middle
188	161	osa-MIR5079a-p3_2ss6GT19TC_2	TCAAATGGTTCTCAAAAACTCG	22	chr10	+	52347573	52347627	cccagttttttagaaccattcgaatacttgatTCAAATGGTTCTCAAAAACTCGc	2	osa-MIR5079a,osa-MIR5079b,	osa-MIR5079a	tttcttataaTTTGGATCTGTTATTTTGGTATcaatctattaggaataggtttacatagttatggttcatttacattacccatctaaatgattacataacataaaaccttaatgaaatggaaaaaacttccatttttgtgtttgatttgagaaccccttgaacgccttctcaaagggttctcaaaaattcgagatagatctaattagactcttttacttttttctgaattttttagtatttccactatggaatatagagcggactagtagaagaaaaaaaatcctatttaggataataattggataacagagcctctaccctgtcaacggatagcgagagaacaaaatctggataaataccgattcctattactggtaaaaagatacagattaaaagaa…	osa-MIR5079a-p3	tcaaagggttctcaaaaattcg	3'	New	gp2b	...(((((((.(((((((((.((((.....)))).))))))))).)))))))...	49	36.4	-19.6	1	0	2.5	0	0	0	0	0	0	5.5	0	0	0	0	5.91497	0	0	0	0	0	0	26.7776	0	0	0	middle
189	161	osa-MIR5079a-p3_2ss6GT19TC_2	TCAAATGGTTCTCAAAAACTCG	22	chr8	+	200122955	200123009	cccagtttttgagaaccattcaaatacttgatTCAAATGGTTCTCAAAAACTCGc	2	osa-MIR5079a,osa-MIR5079b,	osa-MIR5079a	tttcttataaTTTGGATCTGTTATTTTGGTATcaatctattaggaataggtttacatagttatggttcatttacattacccatctaaatgattacataacataaaaccttaatgaaatggaaaaaacttccatttttgtgtttgatttgagaaccccttgaacgccttctcaaagggttctcaaaaattcgagatagatctaattagactcttttacttttttctgaattttttagtatttccactatggaatatagagcggactagtagaagaaaaaaaatcctatttaggataataattggataacagagcctctaccctgtcaacggatagcgagagaacaaaatctggataaataccgattcctattactggtaaaaagatacagattaaaagaa…	osa-MIR5079a-p3	tcaaagggttctcaaaaattcg	3'	New	gp2b	...(((((((((((((((((..(((.....)))..)))))))))))))))))...	49	36.4	-22.6	1.1	0	2.5	0	0	0	0	0	0	5.5	0	0	0	0	5.91497	0	0	0	0	0	0	26.7776	0	0	0	middle
190	162	osa-MIR5079a-p3_2ss4GT17TC	AAATGGTTCTCAAAAACTCG	20	chr2	+	254129186	254129252	aatgaatttttgagaaattatttatataaaaaaatgtcgttattcAAATGGTTCTCAAAAACTCGca	2	osa-MIR5079a,osa-MIR5079b,	osa-MIR5079a	tttcttataaTTTGGATCTGTTATTTTGGTATcaatctattaggaataggtttacatagttatggttcatttacattacccatctaaatgattacataacataaaaccttaatgaaatggaaaaaacttccatttttgtgtttgatttgagaaccccttgaacgccttctcaaagggttctcaaaaattcgagatagatctaattagactcttttacttttttctgaattttttagtatttccactatggaatatagagcggactagtagaagaaaaaaaatcctatttaggataataattggataacagagcctctaccctgtcaacggatagcgagagaacaaaatctggataaataccgattcctattactggtaaaaagatacagattaaaagaa…	osa-MIR5079a-p3	aaagggttctcaaaaattcg	3'	New	gp2b	...((.((((((((((...((((..((((..........))))..))))..)))))))))).))...	61	22.4	-11.4	0.8	10.5	0	3	0	0	0	0	12.5	15.5	0	0	3.5	3.95101	0	2.87375	0	0	0	0	7.62567	75.464	0	0	3.99563	middle
191	162	osa-MIR5079a-p3_2ss4GT17TC	AAATGGTTCTCAAAAACTCG	20	chr6	+	253015882	253015936	cccagtttttgagaaccattcaaatacttgattcAAATGGTTCTCAAAAACTCGc	2	osa-MIR5079a,osa-MIR5079b,	osa-MIR5079a	tttcttataaTTTGGATCTGTTATTTTGGTATcaatctattaggaataggtttacatagttatggttcatttacattacccatctaaatgattacataacataaaaccttaatgaaatggaaaaaacttccatttttgtgtttgatttgagaaccccttgaacgccttctcaaagggttctcaaaaattcgagatagatctaattagactcttttacttttttctgaattttttagtatttccactatggaatatagagcggactagtagaagaaaaaaaatcctatttaggataataattggataacagagcctctaccctgtcaacggatagcgagagaacaaaatctggataaataccgattcctattactggtaaaaagatacagattaaaagaa…	osa-MIR5079a-p3	aaagggttctcaaaaattcg	3'	New	gp2b	...(((((((((((((((((..(((.....)))..)))))))))))))))))...	49	36.4	-22.6	1.1	10.5	0	3	0	0	0	0	12.5	15.5	0	0	3.5	3.95101	0	2.87375	0	0	0	0	7.62567	75.464	0	0	3.99563	middle
192	163	osa-MIR5079a-p3_2ss5GT18TC	CAAATGGTTCTCAAAAACTCG	21	chr4	+	119502193	119502247	cccagcttttgagaaccatttgaatacttgattCAAATGGTTCTCAAAAACTCGc	2	osa-MIR5079a,osa-MIR5079b,	osa-MIR5079a	tttcttataaTTTGGATCTGTTATTTTGGTATcaatctattaggaataggtttacatagttatggttcatttacattacccatctaaatgattacataacataaaaccttaatgaaatggaaaaaacttccatttttgtgtttgatttgagaaccccttgaacgccttctcaaagggttctcaaaaattcgagatagatctaattagactcttttacttttttctgaattttttagtatttccactatggaatatagagcggactagtagaagaaaaaaaatcctatttaggataataattggataacagagcctctaccctgtcaacggatagcgagagaacaaaatctggataaataccgattcctattactggtaaaaagatacagattaaaagaa…	osa-MIR5079a-p3	caaagggttctcaaaaattcg	3'	New	gp2b	...((.(((((((((((((((((((.....))))))))))))))))))).))...	49	38.2	-25.7	1.2	0	2.5	3.5	0	0	0	0	6	4.5	0	0	0	0	5.91497	3.35271	0	0	0	0	3.66032	21.9089	0	0	0	middle
193	163	osa-MIR5079a-p3_2ss5GT18TC	CAAATGGTTCTCAAAAACTCG	21	chr9	+	224464680	224464734	cccagttttttagaaccatttgaatcaagtattCAAATGGTTCTCAAAAACTCGt	2	osa-MIR5079a,osa-MIR5079b,	osa-MIR5079a	tttcttataaTTTGGATCTGTTATTTTGGTATcaatctattaggaataggtttacatagttatggttcatttacattacccatctaaatgattacataacataaaaccttaatgaaatggaaaaaacttccatttttgtgtttgatttgagaaccccttgaacgccttctcaaagggttctcaaaaattcgagatagatctaattagactcttttacttttttctgaattttttagtatttccactatggaatatagagcggactagtagaagaaaaaaaatcctatttaggataataattggataacagagcctctaccctgtcaacggatagcgagagaacaaaatctggataaataccgattcctattactggtaaaaagatacagattaaaagaa…	osa-MIR5079a-p3	caaagggttctcaaaaattcg	3'	New	gp2b	...(((((((.((((((((((((((.....)))))))))))))).)))))))...	49	32.7	-23.1	1.3	0	2.5	3.5	0	0	0	0	6	4.5	0	0	0	0	5.91497	3.35271	0	0	0	0	3.66032	21.9089	0	0	0	middle
194	164	osa-MIR5083-p5_1ss18GT	TGGATCCTTCTGAGCCTT	18	chr1	+	170969020	170969068	tgagTGGATCCTTCTGAGCCTTcttcctaggctcagaaccatctatctt	1	osa-MIR5083,	osa-MIR5083	tcctggcagttcttcagataatcagatttgtccatgaggtttcaactgttgcattccattgttgagttttattctgtttgcgtttctgtttgtttttgtcatggatctggctgattggaggctgtgatgaccaaaaaatacctacctattttctgagggattccagtccttctgattgatagaaaccaatggatccttctgagcctgccaagatcttcagattcttagttttgtattcggctttttcgatttgtcttcgtatattgcattcttctaaaagcaagcaagattcgtaacagttgatgggatgataacctttcacagaaactgtatgtgttgacccaaaattcAGACTACAATTATCTGATCAactcagacat	osa-MIR5083-p5	tggatccttctgagcctg	5'	New	gp2b	...((((((..((((((((((.......))))))))))..))))))...	43	46.9	-21.4	0.9	0	0	0	2.5	5	0	0	0	0	3.5	7	38.5	0	0	0	11.3065	3.52806	0	0	0	0	1.91441	2.39767	43.952	middle
195	164	osa-MIR5083-p5_1ss18GT	TGGATCCTTCTGAGCCTT	18	chr1	+	256376168	256376216	cgagTGGATCCTTCTGAGCCTTcttcgtaggctcgggaccatctacctt	1	osa-MIR5083,	osa-MIR5083	tcctggcagttcttcagataatcagatttgtccatgaggtttcaactgttgcattccattgttgagttttattctgtttgcgtttctgtttgtttttgtcatggatctggctgattggaggctgtgatgaccaaaaaatacctacctattttctgagggattccagtccttctgattgatagaaaccaatggatccttctgagcctgccaagatcttcagattcttagttttgtattcggctttttcgatttgtcttcgtatattgcattcttctaaaagcaagcaagattcgtaacagttgatgggatgataacctttcacagaaactgtatgtgttgacccaaaattcAGACTACAATTATCTGATCAactcagacat	osa-MIR5083-p5	tggatccttctgagcctg	5'	New	gp2b	...((((((..((((((((((.......))))))))))..))))))...	43	55.1	-21.8	0.8	0	0	0	2.5	5	0	0	0	0	3.5	7	38.5	0	0	0	11.3065	3.52806	0	0	0	0	1.91441	2.39767	43.952	middle
196	165	osa-miR5083	AGACTACAATTATCTGATCA	20	chr1	+	368829317	368829356	taagatccaaggtaatgaAGACTACAATTATCTGCTCAat	1	osa-MIR5083,	osa-MIR5083	tcctggcagttcttcagataatcagatttgtccatgaggtttcaactgttgcattccattgttgagttttattctgtttgcgtttctgtttgtttttgtcatggatctggctgattggaggctgtgatgaccaaaaaatacctacctattttctgagggattccagtccttctgattgatagaaaccaatggatccttctgagcctgccaagatcttcagattcttagttttgtattcggctttttcgatttgtcttcgtatattgcattcttctaaaagcaagcaagattcgtaacagttgatgggatgataacctttcacagaaactgtatgtgttgacccaaaattcAGACTACAATTATCTGATCAactcagacat	osa-miR5083	AGACTACAATTATCTGATCA	3'	Yes	gp2b	...((....(((((((..........)))))))..))...	34	32.5	-4	0.3	0	0	0	0	5	0	0	0	0	6	0	7	0	0	0	0	3.52806	0	0	0	0	3.28185	0	7.99127	low
197	166	osa-MIR5083-p5_2ss19AC20CA	ACTACAATTATCTGATCACA	20	chr11	+	1450691	1450742	gagataACTACAATTATCTCATCACAaatgttgaggtaagtgaagttgtatg	1	osa-MIR5083,	osa-MIR5083	tcctggcagttcttcagataatcagatttgtccatgaggtttcaactgttgcattccattgttgagttttattctgtttgcgtttctgtttgtttttgtcatggatctggctgattggaggctgtgatgaccaaaaaatacctacctattttctgagggattccagtccttctgattgatagaaaccaatggatccttctgagcctgccaagatcttcagattcttagttttgtattcggctttttcgatttgtcttcgtatattgcattcttctaaaagcaagcaagattcgtaacagttgatgggatgataacctttcacagaaactgtatgtgttgacccaaaattcAGACTACAATTATCTGATCAactcagacat	osa-MIR5083-p5	ACTACAATTATCTGATCAac	5'	New	gp2b	...((((((.((.((((((((.((....)).)))))))).)).))))))...	46	32.7	-14.8	0.9	0	0	0	0	0	0	0	0	0	0	0	23	0	0	0	0	0	0	0	0	0	0	0	26.257	middle
198	167	osa-miR5083_L-2	ACTACAATTATCTGATCA	18	chr2	-	294563934	294564035	taccgACTACAATTATCTGATCCctgtgagtatgaaaaatcaaactagttcaggtttatatattaaatgatagaatttctaatagaagtacaggacagggtt	1	osa-MIR5083,	osa-MIR5083	tcctggcagttcttcagataatcagatttgtccatgaggtttcaactgttgcattccattgttgagttttattctgtttgcgtttctgtttgtttttgtcatggatctggctgattggaggctgtgatgaccaaaaaatacctacctattttctgagggattccagtccttctgattgatagaaaccaatggatccttctgagcctgccaagatcttcagattcttagttttgtattcggctttttcgatttgtcttcgtatattgcattcttctaaaagcaagcaagattcgtaacagttgatgggatgataacctttcacagaaactgtatgtgttgacccaaaattcAGACTACAATTATCTGATCAactcagacat	osa-miR5083	AGACTACAATTATCTGATCA	5'	Diff	gp2b	.....................((((((.(((.(((....))).)))............................(((((.....))))).....))))))..	79	31.4	-13.7	0.4	0	0	0	6	21	15	0	0	9	11	0	255	0	0	0	27.1355	14.8179	20.0336	0	0	43.8178	6.01673	0	291.111	middle
199	168	osa-MIR5083-p5_1ss19GT	ATGGATCCTTCTGAGCCTT	19	chr2	-	373786916	373786952	ATGCATCCTTCTGAGCCTTcttcgtaggcacggaatc	1	osa-MIR5083,	osa-MIR5083	tcctggcagttcttcagataatcagatttgtccatgaggtttcaactgttgcattccattgttgagttttattctgtttgcgtttctgtttgtttttgtcatggatctggctgattggaggctgtgatgaccaaaaaatacctacctattttctgagggattccagtccttctgattgatagaaaccaatggatccttctgagcctgccaagatcttcagattcttagttttgtattcggctttttcgatttgtcttcgtatattgcattcttctaaaagcaagcaagattcgtaacagttgatgggatgataacctttcacagaaactgtatgtgttgacccaaaattcAGACTACAATTATCTGATCAactcagacat	osa-MIR5083-p5	atggatccttctgagcctg	5'	New	gp2b	........(((((.((((.......)))).)))))..	27	51.4	-10.4	0.5	17.5	0	6.5	3	19.5	16	0	14.5	7.5	18	26	61	6.58501	0	6.22645	13.5678	13.7594	21.3692	0	8.84577	36.5148	9.84555	8.90563	69.6382	middle
200	169	osa-MIR5083-p3_1ss19GT	ATGGATCCTTCTGAGCCTT	19	chr5	+	176441162	176441256	tttgggaggctgtgatgtgttaaaactacctattttctgatggggttttctcccctctgattggcaaaccaATGGATCCTTCTGAGCCTTcctta	1	osa-MIR5083,	osa-MIR5083	tcctggcagttcttcagataatcagatttgtccatgaggtttcaactgttgcattccattgttgagttttattctgtttgcgtttctgtttgtttttgtcatggatctggctgattggaggctgtgatgaccaaaaaatacctacctattttctgagggattccagtccttctgattgatagaaaccaatggatccttctgagcctgccaagatcttcagattcttagttttgtattcggctttttcgatttgtcttcgtatattgcattcttctaaaagcaagcaagattcgtaacagttgatgggatgataacctttcacagaaactgtatgtgttgacccaaaattcAGACTACAATTATCTGATCAactcagacat	osa-MIR5083-p3	atggatccttctgagcctg	3'	New	gp2b	...((((((((..((.......................((.((((......))))))..(((((....))))).......))..))))))))...	89	44.2	-26.3	0.6	17.5	0	6.5	3	19.5	16	0	14.5	7.5	18	26	61	6.58501	0	6.22645	13.5678	13.7594	21.3692	0	8.84577	36.5148	9.84555	8.90563	69.6382	middle
201	170	osa-MIR5083-p5_1ss20GT	AATGGATCCTTCTGAGCCTT	20	chr9	-	40374368	40374414	aAATGGATCTTTCTGAGCCTTcttcgtaggctcgaaatcatctacct	1	osa-MIR5083,	osa-MIR5083	tcctggcagttcttcagataatcagatttgtccatgaggtttcaactgttgcattccattgttgagttttattctgtttgcgtttctgtttgtttttgtcatggatctggctgattggaggctgtgatgaccaaaaaatacctacctattttctgagggattccagtccttctgattgatagaaaccaatggatccttctgagcctgccaagatcttcagattcttagttttgtattcggctttttcgatttgtcttcgtatattgcattcttctaaaagcaagcaagattcgtaacagttgatgggatgataacctttcacagaaactgtatgtgttgacccaaaattcAGACTACAATTATCTGATCAactcagacat	osa-MIR5083-p5	aatggatccttctgagcctg	5'	New	gp2b	...(((((.((((.((((((.......))))))))))..)))))...	41	42.6	-14.3	0.7	9.5	0	2.5	3	4	3	0	9.5	0	7	7	0	3.57472	0	2.39479	13.5678	2.82245	4.00672	0	5.79551	0	3.82883	2.39767	0	middle
202	171	cas-MIR5139-p3_2ss16GC17AG	ACTCTGATGGAGGCTCGT	18	chr3	-	56004618	56004656	aaagcgaagccagaggaaACTCTGATGGAGGCTCGCagc	1	cas-MIR5139,	cas-MIR5139	gcacAAACCTGGCTCTGATACCAcataatacgaactccctaggatgaaactctgatggaggctgatgacaggtaagtggcgacgtgaattgatggtgatgatgcacaggtggattgc	cas-MIR5139-p3	actctgatggaggctgat	3'	New	gp2b	...(((.((((((((....))))......)))))))...	33	56.4	-16.4	0.7	0	0	0	4	13.5	17	0	0	0	6	0	26.5	0	0	0	18.0903	9.52576	22.7048	0	0	0	3.28185	0	30.2527	middle
203	171	cas-MIR5139-p3_2ss16GC17AG	ACTCTGATGGAGGCTCGT	18	chr8	+	263458931	263459066	cttgcttacctccatggtccatacggcgctcgctatcctcctcccttcctgtcttcgtcatgggttgcttcttgatataagcagggggattagctaagctagagttgcctttggaACTCTGATGGAGGCTAGTgta	1	cas-MIR5139,	cas-MIR5139	gcacAAACCTGGCTCTGATACCAcataatacgaactccctaggatgaaactctgatggaggctgatgacaggtaagtggcgacgtgaattgatggtgatgatgcacaggtggattgc	cas-MIR5139-p3	actctgatggaggctgat	3'	New	gp2b	...(((..(((((((((((((...((((((((((...((..((((..((((.(((.((((.(((.....)))))))..)))))))))))..))...)))..))).))))..))).)))...)))))))..)))...	130	50.7	-47.8	0.7	0	0	0	4	13.5	17	0	0	0	6	0	26.5	0	0	0	18.0903	9.52576	22.7048	0	0	0	3.28185	0	30.2527	middle
204	172	osa-miR5179	TTTTGCTCAAGACCGCGCAAC	21	chr11	-	161657122	161657166	agagagcgcatgatgggTTTTGCTCAAGACCGCGCAACgcttcca	2	osa-MIR5179,bdi-MIR5179,	osa-MIR5179	ttgagaggcgTTTTGCTCAAGACCGCGCAACgattccatatgacaccgcatcgttgtccatgcctatcatgttcatccagagcccctgttgatcttcagataagagaaaagctcaaaattaaagaaggcttgtttattgatcatgtcaaggataggtatcgacggcgatgcgctggctatggccatggttgtgcggttcttgcgcaataacgttttgatctcga	osa-miR5179	TTTTGCTCAAGACCGCGCAAC	3'	Yes	gp2b	...(((((..((.((((((((....)))))).)))).)))))...	39	55.6	-12.1	0.5	6.5	0	0	6.5	17	13.5	6	15.5	0	33	862.5	124.5	2.44586	0	0	29.3968	11.9954	18.0302	4.10973	9.45583	0	18.0502	295.427	142.13	middle
205	172	osa-miR5179	TTTTGCTCAAGACCGCGCAAC	21	chr6	-	264422489	264422551	tcttcttgtcccccttcatttctagcgagagcatgatgggTTTTGCTCAAGACCGCGCAACgc	2	osa-MIR5179,bdi-MIR5179,	osa-MIR5179	ttgagaggcgTTTTGCTCAAGACCGCGCAACgattccatatgacaccgcatcgttgtccatgcctatcatgttcatccagagcccctgttgatcttcagataagagaaaagctcaaaattaaagaaggcttgtttattgatcatgtcaaggataggtatcgacggcgatgcgctggctatggccatggttgtgcggttcttgcgcaataacgttttgatctcga	osa-miR5179	TTTTGCTCAAGACCGCGCAAC	3'	Yes	gp2b	...(((((...(((.((((((((....)))).)))).))).......)))))..(((...)))	49	52.4	-13	0.4	6.5	0	0	6.5	17	13.5	6	15.5	0	33	862.5	124.5	2.44586	0	0	29.3968	11.9954	18.0302	4.10973	9.45583	0	18.0502	295.427	142.13	middle
206	173	gma-MIR5368-p5_1ss6TC	CTGTTCCCTGGGATTGGCTTTG	22	chr1	+	301942582	301942751	aCTGTTCCCTGGGATTGGCTTTGggcctttcctgcgcagcttaggtggaaggcgaagaaggcctccttccgggggggcccgagccaccagtGAGATACCACTCTGGAAGagctagaattctaaccttgtttcaggacctacgggccaagggacagtctcaggtagacagt	1	gma-MIR5368,	gma-MIR5368	actgtttcctgggattggctttgggctttcctgcacagcttaggtggagggcaaagaagacttccttctgagggggccagagccatcagagagataccactctggacgagctagaattctaaccttgtgccaggacctatgggccgagGGACAGTCTCAGGTAGACAgt	gma-MIR5368-p5	ctgtttcctgggattggctttg	5'	New	gp2b	((((((.((((((((((.((((((.((..(((((...(((..(((((((((((......((((((((....))))))))...)))...((((......))))((((.....))))..)))).)))).))).))))).....)).))))))..))))))))))..))))))	170	57.1	-69.4	0.7	97	0	0	0	0	0	19	138	2.5	0	0	0	36.4998	0	0	0	0	0	13.0141	84.1873	12.1716	0	0	0	middle
206	174	gma-MIR5368-p3_1ss17CA	GAGATACCACTCTGGAAG	18	chr1	+	301942582	301942751	aCTGTTCCCTGGGATTGGCTTTGggcctttcctgcgcagcttaggtggaaggcgaagaaggcctccttccgggggggcccgagccaccagtGAGATACCACTCTGGAAGagctagaattctaaccttgtttcaggacctacgggccaagggacagtctcaggtagacagt	1	gma-MIR5368,	gma-MIR5368	actgtttcctgggattggctttgggctttcctgcacagcttaggtggagggcaaagaagacttccttctgagggggccagagccatcagagagataccactctggacgagctagaattctaaccttgtgccaggacctatgggccgagGGACAGTCTCAGGTAGACAgt	gma-MIR5368-p3	gagataccactctggacg	3'	New	gp2b	((((((.((((((((((.((((((.((..(((((...(((..(((((((((((......((((((((....))))))))...)))...((((......))))((((.....))))..)))).)))).))).))))).....)).))))))..))))))))))..))))))	170	57.1	-69.4	0.7	118.5	12	0	0	2.5	0	47.5	298.5	97	0	6	35	44.59	28.3918	0	0	1.76403	0	32.5353	182.101	472.259	0	2.05514	39.9563	middle
207	175	gma-MIR5368-p5_1ss10AG	CTTTCCTGCGCAGCTTAGG	19	chr8	+	260363706	260363833	CTTTCCTGCGCAGCTTAGGtggaaggcgaagaaggcctatttcgggggggggggggggggggggggggggggagccaccagtGAGATACCACTCTGGAAGagctagaattctaaccttgtgtcaggac	1	gma-MIR5368,	gma-MIR5368	actgtttcctgggattggctttgggctttcctgcacagcttaggtggagggcaaagaagacttccttctgagggggccagagccatcagagagataccactctggacgagctagaattctaaccttgtgccaggacctatgggccgagGGACAGTCTCAGGTAGACAgt	gma-MIR5368-p5	ctttcctgcacagcttagg	5'	New	gp2b	...(((((((((....(((((((((((.......)))).((((((((..((.........((..((........)).)).........)).))))))))..........)))).))))))).))))).	124	61.7	-35.3	0.4	0	0	0	0	0	0	0	2.5	0	0	0	0	0	0	0	0	0	0	0	1.52513	0	0	0	0	low
207	174	gma-MIR5368-p3_1ss17CA	GAGATACCACTCTGGAAG	18	chr8	+	260363706	260363833	CTTTCCTGCGCAGCTTAGGtggaaggcgaagaaggcctatttcgggggggggggggggggggggggggggggagccaccagtGAGATACCACTCTGGAAGagctagaattctaaccttgtgtcaggac	1	gma-MIR5368,	gma-MIR5368	actgtttcctgggattggctttgggctttcctgcacagcttaggtggagggcaaagaagacttccttctgagggggccagagccatcagagagataccactctggacgagctagaattctaaccttgtgccaggacctatgggccgagGGACAGTCTCAGGTAGACAgt	gma-MIR5368-p3	gagataccactctggacg	3'	New	gp2b	...(((((((((....(((((((((((.......)))).((((((((..((.........((..((........)).)).........)).))))))))..........)))).))))))).))))).	124	61.7	-35.3	0.4	118.5	12	0	0	2.5	0	47.5	298.5	97	0	6	35	44.59	28.3918	0	0	1.76403	0	32.5353	182.101	472.259	0	2.05514	39.9563	middle
208	173	gma-MIR5368-p5_1ss6TC	CTGTTCCCTGGGATTGGCTTTG	22	chr9	+	50375742	50375911	aCTGTTCCCTGGGATTGGCTTTGggcctttcctgcgcagcttaggtggaaggcgaagaaggcctccttccgggggggcccgagccaccaaTGAGATACCACTCTGGAAGagctagaattctaaccttgtgtcaggacctacgggccaagggacagtctcaggtagacagt	1	gma-MIR5368,	gma-MIR5368	actgtttcctgggattggctttgggctttcctgcacagcttaggtggagggcaaagaagacttccttctgagggggccagagccatcagagagataccactctggacgagctagaattctaaccttgtgccaggacctatgggccgagGGACAGTCTCAGGTAGACAgt	gma-MIR5368-p5	ctgtttcctgggattggctttg	5'	New	gp2b	((((((.((((((((((.((((((.((..((((((((((....(((((....((.....((((((((....))))))))))..))))).............(((((.....))))).........))))).))))).....)).))))))..))))))))))..))))))	170	57.1	-72.6	0.7	97	0	0	0	0	0	19	138	2.5	0	0	0	36.4998	0	0	0	0	0	13.0141	84.1873	12.1716	0	0	0	middle
208	176	gma-MIR5368-p3_2ss1AT18CA	TGAGATACCACTCTGGAAG	19	chr9	+	50375742	50375911	aCTGTTCCCTGGGATTGGCTTTGggcctttcctgcgcagcttaggtggaaggcgaagaaggcctccttccgggggggcccgagccaccaaTGAGATACCACTCTGGAAGagctagaattctaaccttgtgtcaggacctacgggccaagggacagtctcaggtagacagt	1	gma-MIR5368,	gma-MIR5368	actgtttcctgggattggctttgggctttcctgcacagcttaggtggagggcaaagaagacttccttctgagggggccagagccatcagagagataccactctggacgagctagaattctaaccttgtgccaggacctatgggccgagGGACAGTCTCAGGTAGACAgt	gma-MIR5368-p3	agagataccactctggacg	3'	New	gp2b	((((((.((((((((((.((((((.((..((((((((((....(((((....((.....((((((((....))))))))))..))))).............(((((.....))))).........))))).))))).....)).))))))..))))))))))..))))))	170	57.1	-72.6	0.7	158	5.5	3.5	0	0	0	43	461.5	203.5	0	0	65	59.4533	13.0129	3.35271	0	0	0	29.4531	281.54	990.769	0	0	74.2046	high
209	177	gma-MIR5368-p5_1ss19TC	CTGGGATTGGCTTTGGGCC	19	chr1	+	311951710	311951912	CTGGGATTGGCTTTGGGCCtttcctgcgcagcttaggtggaaggcgaagaaggcctccttcaggggggggggggggggggcgagccaccagtcagataccactctggaagatctagaattCTAACCTTGTGTCAGGACCTacgggccaagggacagtctcaggtagacagtttctatggggagtaggccttccaaaaggtaac	1	gma-MIR5368,	gma-MIR5368	actgtttcctgggattggctttgggctttcctgcacagcttaggtggagggcaaagaagacttccttctgagggggccagagccatcagagagataccactctggacgagctagaattctaaccttgtgccaggacctatgggccgagGGACAGTCTCAGGTAGACAgt	gma-MIR5368-p5	ctgggattggctttgggct	5'	New	gp2b	((((...((((((...((((..((..(((..((.....))...))).......(((((..(....)..)))))))..))))))))))))))...........(((((.....)))))......(((((.((..(((.(((((...(((((..((.((((.....)))).))..)).)))...))))))))..)).)))))...	91	57.1	-76.1	0.7	23	0	0	0	0	0	0	21	0	0	0	0	8.65459	0	0	0	0	0	0	12.8111	0	0	0	0	middle
209	178	gma-MIR5368-p3_1ss12CT	CTAACCTTGTGTCAGGACCT	20	chr1	+	311951710	311951912	CTGGGATTGGCTTTGGGCCtttcctgcgcagcttaggtggaaggcgaagaaggcctccttcaggggggggggggggggggcgagccaccagtcagataccactctggaagatctagaattCTAACCTTGTGTCAGGACCTacgggccaagggacagtctcaggtagacagtttctatggggagtaggccttccaaaaggtaac	1	gma-MIR5368,	gma-MIR5368	actgtttcctgggattggctttgggctttcctgcacagcttaggtggagggcaaagaagacttccttctgagggggccagagccatcagagagataccactctggacgagctagaattctaaccttgtgccaggacctatgggccgagGGACAGTCTCAGGTAGACAgt	gma-MIR5368-p3	ctaaccttgtgccaggacct	3'	New	gp2b	((((...((((((...((((..((..(((..((.....))...))).......(((((..(....)..)))))))..))))))))))))))...........(((((.....)))))......(((((.((..(((.(((((...(((((..((.((((.....)))).))..)).)))...))))))))..)).)))))...	91	57.1	-76.1	0.7	145	19.5	2.5	6.5	5.5	4	46	255	9	8	5	14.5	54.5615	46.1367	2.39479	29.3968	3.88087	5.3423	31.5079	155.564	43.8178	4.3758	1.71262	16.5533	middle
210	179	gma-MIR5368-p5_1ss12CA	ACCACTCTGGAAGAGCTAG	19	chr11	+	112171690	112171914	actgttccctgggattggctttgggcctttcctgcgcagcttaggtggaaggagaagaaggcctccttccgggggggcccgagccaccagtgagatACCACTCTGGAAGAGCTAGaattCTAACCTTGTGTCAGGACCTacgggccaagggacagtctcaggtagacagtttctatggggcgtaggcctcccaaaaggtaacggaggcatgcaaaggtttcctcg	1	gma-MIR5368,	gma-MIR5368	actgtttcctgggattggctttgggctttcctgcacagcttaggtggagggcaaagaagacttccttctgagggggccagagccatcagagagataccactctggacgagctagaattctaaccttgtgccaggacctatgggccgagGGACAGTCTCAGGTAGACAgt	gma-MIR5368-p5	accactctggacgagctag	5'	New	gp2b	.((.((((((((...((((.((((((((..((.((...))......((((((((........))))))))))..)))))))))))))))).(((......))).)))).))...........(((((.((..(((.((((((..(((((..((.((((.....)))).))..)).)))..)))))))))..)).)))))....((((...((....))..)))).	110	56.4	-91.1	0.7	127.5	7.5	0	0	0	0	51.5	310.5	58	0	0	12	47.9765	17.7449	0	0	0	0	35.2752	189.422	282.381	0	0	13.6993	middle
210	178	gma-MIR5368-p3_1ss12CT	CTAACCTTGTGTCAGGACCT	20	chr11	+	112171690	112171914	actgttccctgggattggctttgggcctttcctgcgcagcttaggtggaaggagaagaaggcctccttccgggggggcccgagccaccagtgagatACCACTCTGGAAGAGCTAGaattCTAACCTTGTGTCAGGACCTacgggccaagggacagtctcaggtagacagtttctatggggcgtaggcctcccaaaaggtaacggaggcatgcaaaggtttcctcg	1	gma-MIR5368,	gma-MIR5368	actgtttcctgggattggctttgggctttcctgcacagcttaggtggagggcaaagaagacttccttctgagggggccagagccatcagagagataccactctggacgagctagaattctaaccttgtgccaggacctatgggccgagGGACAGTCTCAGGTAGACAgt	gma-MIR5368-p3	ctaaccttgtgccaggacct	3'	New	gp2b	.((.((((((((...((((.((((((((..((.((...))......((((((((........))))))))))..)))))))))))))))).(((......))).)))).))...........(((((.((..(((.((((((..(((((..((.((((.....)))).))..)).)))..)))))))))..)).)))))....((((...((....))..)))).	110	56.4	-91.1	0.7	145	19.5	2.5	6.5	5.5	4	46	255	9	8	5	14.5	54.5615	46.1367	2.39479	29.3968	3.88087	5.3423	31.5079	155.564	43.8178	4.3758	1.71262	16.5533	middle
211	180	gma-MIR5368-p5_1ss14CA	ATACCACTCTGGAAGAGCTAG	21	chr1	+	457708620	457708827	tttcctgcgcagcttaggtggaaggcgaagaaggcctccttccgggggggcccgagccaccagtgagATACCACTCTGGAAGAGCTAGaattctaacCTTGTGTCAGGACCTACGggccagtactggccgggccattacttctttttttctgatgaatcgttcatagatcaaacggtaacggatagggtatagggctaacaggtattg	1	gma-MIR5368,	gma-MIR5368	actgtttcctgggattggctttgggctttcctgcacagcttaggtggagggcaaagaagacttccttctgagggggccagagccatcagagagataccactctggacgagctagaattctaaccttgtgccaggacctatgggccgagGGACAGTCTCAGGTAGACAgt	gma-MIR5368-p5	ataccactctggacgagctag	5'	New	gp2b	...((((...(((((.(((((....((.....((((((((....))))))))))..))))).(((......))).......))))).....(((((((((((.((.((.(((...(((((....)))))))))).(((((...(((..((((.((((...))))))))..))).))))).))))))))).)))).....)))).....	76	51.9	-63.4	0.6	125	9	5	3	2.5	0	39.5	342.5	67.5	0	0	28.5	47.0358	21.2939	4.78958	13.5678	1.76403	0	27.0557	208.943	328.634	0	0	32.5359	middle
[truncated: 629 more rows]
