# Supplementary material for: Integration of mRNA and miRNA Analysis Reveals the Post-Transcriptional Regulation of Salt Stress Response in Hemerocallis fulva
Source: Int J Mol Sci. 2023 Apr 14;24(8):7290. doi: 10.3390/ijms24087290 (PMC10139057; doi:10.3390/ijms24087290)
Supplement: Supplementary file 1 [file ijms-24-07290-s001.zip › Table S5.xlsx]

## Sheet: Sheet1
Table S5 The conserved miRNAs classified into different miRNA family
AC	ID	MI
MIPF0000004	MIR166	osa-miR166b-5p_1ss19GT,osa-miR166b-5p_R+1_2ss11CT19GA,osa-miR166d-5p,osa-miR166d-5p_R+1_1ss19AT,osa-miR166l-5p_2ss1GA18AG,osa-miR166h-5p_2ss5TC8TC,ptc-MIR166e-p5_2ss19TA21TC,mtr-MIR166f-p5_1ss6GT,aly-miR165a-3p_R+1
MIPF0000008	MIR156	osa-miR156a_L+1_1ss9AC,osa-miR156b-3p_2ss8-T12TA,osa-miR156a_L+1R-1,osa-miR156f-3p_2ss13TA14TC,osa-miR156a_L+1,osa-MIR156f-p5,osa-MIR156g-p5,osa-miR156c-3p_L+3R-3_1ss16CT,osa-miR156a_L+1R-2,zma-miR156i-3p,ptc-miR156g,ptc-MIR156j-p3,mtr-miR156b-3p_L-1_1ss15CT,sbi-MIR156f-p3,sbi-miR156a_1ss20CT,ahy-miR156b-5p_R+2,cca-MIR156b-p3_2ss8TA19GC,cca-MIR156c-p3_2ss7CT17AC,lus-miR156a_L+1R+1,stu-miR156f-5p_…
MIPF0000010	MIR159	ath-miR159c_R-1_1ss5GT,ath-miR159c_R-1_1ss12GT,ath-miR159c_R-1_1ss6AG,osa-MIR159c-p5_2ss13GA19TC,osa-miR159d_R-1_1ss1AG,osa-MIR159e-p5_2ss18AC21AC,osa-MIR159e-p5_1ss18AC,osa-miR319a-3p.2-3p_R+1,mtr-miR319a-3p,gma-MIR159a-p3_1ss17GC,sbi-miR159b_R-1,ptc-miR159d_L+1R-1,mtr-MIR319b-p5_1ss2GT,mtr-MIR319b-p5,aly-miR319a-5p_2ss12GC19TC,aly-miR319a-3p_1ss21TA,bdi-miR319b-5p_2ss7CT8TC,gma-miR156aa_L-1R+3_…
MIPF0000012	MIR169_1	osa-miR169e_2ss13AG21GA,vvi-MIR169x-p5_2ss14GC20GA,ssp-MIR169-p3_2ss13GC17AC
MIPF0000015	MIR399	osa-miR399a,osa-miR399j,ppe-MIR399f-p5_2ss6TA18CT,ppe-MIR399j-p5_2ss6CA18CT,bdi-miR399d
MIPF0000016	MIR395	ath-miR395a_L+2,osa-MIR395i-p3_2ss14TG17TC,osa-miR395b_L+1R-1_1ss2GC,zma-miR395l-5p_R-2_1ss20CG,osa-miR395x_L-1R+1_1ss16TA,aly-miR395c-3p_L+2_1ss19GA,gma-MIR395i-p3_1ss14TA_2,gma-MIR395i-p3_1ss14TA_1,gma-MIR395i-p3_1ss15TA,gma-MIR395i-p3_1ss14TG,gma-MIR395i-p3_2ss14TA20CT,gma-MIR395i-p5_2ss14TA20CT,mdm-miR395a_L-1R+3,stu-MIR395h-p3_1ss6AC,ata-MIR395d-p5_2ss13TA18AT,ata-miR395a-5p_2ss6CT21GT
MIPF0000023	MIR167_1	osa-miR167c-3p_2ss10GC14CT,osa-miR167h-3p_2ss3GA12TC,zma-miR167d-3p_4ss10GC11CT12TG13GA,gra-miR167a_L-2R+2
MIPF0000030	MIR171_1	ath-miR170-3p,osa-miR171b_R+3,tae-miR171b_L-1R+1_1ss21GT,gma-miR171n_R-1_1ss18CT,mes-miR171e_L-1_1ss9CG,lja-miR171d-5p_L-1R+2_1ss9CG
MIPF0000032	MIR160	osa-miR160a-3p_2ss7AG21GA,ptc-miR160h,cme-MIR160c-p5_2ss13AG17AG,ata-miR160b-3p_2ss8CT21AC
MIPF0000035	MIR172	ptc-miR172h-5p_1ss2GT,aly-miR172a-5p_1ss2TA,bdi-MIR172a-p3_2ss8AG17TA,bdi-MIR172a-p5_2ss8AG17TA,mtr-miR172c-5p_1ss9AT,lus-MIR172d-p5_2ss9CA17AT,nta-MIR172f-p5_2ss15CG19TA,nta-MIR172f-p3_2ss14CG18TA,cme-MIR172c-p5,ata-miR172c-5p_R-2_1ss7TC
MIPF0000037	MIR169_2	osa-miR169a,mtr-MIR169a-p3_2ss7GA20TC,mtr-miR169d-5p_L+1R-1_1ss7AG,mtr-miR169d-5p_L+1R-1_1ss21GA,ata-miR169d-3p_L+2R-1_1ss14CT
MIPF0000045	MIR164	osa-miR164c,osa-miR164d_1ss20CA,mtr-MIR164a-p3,gma-miR164a_R+3,aly-miR164a-3p_1ss6AG,bdi-miR164a-3p_2ss10TA20CT,bdi-miR164a-3p_L+1R-1_1ss11TA
MIPF0000047	MIR396	osa-miR396a-3p_R+1_1ss10AC,osa-miR396a-3p_R+1_1ss12CT,osa-miR396a-3p_R-2_1ss18GT,osa-miR396a-3p,osa-miR396a-3p_R+1,osa-miR396a-3p_L-1R+1,osa-miR396a-3p_R-2_1ss18GA,cca-miR396a-5p_R+1,cca-miR396a-3p_L-1_1ss12CG
MIPF0000081	MIR168	osa-miR168a-3p_L-3R+1_1ss19GC,osa-miR168a-3p_L-3_1ss19GC
MIPF0000083	MIR393	osa-miR393b-3p_R+1_2ss4G-8AT,mes-MIR393c-p3_1ss8GC
MIPF0000101	MIR390	gma-miR390b-5p
MIPF0000102	MIR408	gma-miR408a-3p_L-1R+4,mdm-miR408a_L-1R+4
MIPF0000104	MIR171_2	osa-MIR171g-p3_1,osa-MIR171g-p3_2,osa-MIR171g-p5_2ss5GA21TG_2,osa-MIR171g-p5_2ss5GA21TG_1,lja-miR171c_2ss8AG10TC
MIPF0000107	MIR398	osa-MIR398a-p3_1ss11AG,vvi-MIR398c-p5_2ss4TA20GT
MIPF0000120	MIR397	osa-miR397a,aly-miR397a-5p_1ss21GT,gma-MIR397a-p3_2ss2CT21CA
MIPF0000169	MIR162_2	osa-miR162a,osa-miR162a_R+2_1ss21GT
MIPF0000216	MIR477	ppe-miR477-5p_R-1_1ss20TA
MIPF0000369	MIR845_1	ath-miR845a_R+1
MIPF0000402	MIR444	osa-MIR444b-p5,osa-MIR444b-p3,osa-MIR444c-p5_1ss1TC,osa-MIR444d-p5_2ss14CT17CT,osa-MIR444d-p3_2ss14CT17CT,osa-MIR444d-p3
MIPF0000544	MIR828	ath-miR828_2ss11AG17AG,lus-miR828a,mes-miR828a_L+3_1ss20AG,mes-miR828a_L+1_1ss18AG,mes-miR828a_1ss17AG
MIPF0000745	MIR2118	osa-MIR2118e-p3_2ss12TA18CT,osa-MIR2118e-p3_1ss13TA,osa-MIR2118e-p3_2ss13TA19CT
MIPF0000815	MIR2592	mtr-MIR2592ay-p5_2ss6AG17CG_1,mtr-MIR2592ay-p5_2ss6AG17CG_2,mtr-MIR2592bi-p3_2ss8TC19AT_1,mtr-MIR2592bi-p3_2ss8TC19AT_2
MIPF0000831	MIR2676	mtr-MIR2676f-p5_2ss2AT19GA
MIPF0000868	MIR528	osa-miR528-5p_1ss16GA,osa-miR528-5p_1ss21GA,osa-miR528-5p,bdi-miR528-5p_R+2
MIPF0000871	MIR398_2	sbi-MIR398-p5_2ss5GA18AG,sbi-MIR398-p3_2ss5GA18AG
MIPF0001104	MIR319	mtr-miR319a-3p_L+1
MIPF0001113	MIR827_3	ath-miR827_1ss8AG
MIPF0001189	MIR846	ath-MIR846-p3_2ss16TA17CT
MIPF0001284	MIR2600	mtr-MIR2600a-p5_2ss6GC18CA,mtr-MIR2600a-p3_2ss6GC18CA
MIPF0001424	MIR6027	stu-MIR6027-p3_2ss2GT18TG_2,stu-MIR6027-p3_2ss2GT18TG_1
MIPF0001538	MIR6438	ptc-MIR6438b-p5_2ss13TA17CT,ptc-MIR6438b-p3_2ss15TA19CT,ptc-MIR6438b-p5_2ss15TA19CT,ptc-MIR6438b-p3_2ss16TA20CT,ptc-MIR6438b-p3_2ss1CA17TA
MIPF0001542	MIR3630	vvi-miR3630-3p_L-3R-1,vvi-miR3630-3p_L-2R-1_1ss20CT,vvi-miR3630-3p_L-4,vvi-miR3630-3p_L-3,vvi-miR3630-3p_L-2,vvi-miR3630-3p_L-1R-1_1ss20CT,vvi-miR3630-3p_L-2_1ss22CT,vvi-miR3630-3p_L-3_1ss22CT,vvi-miR3630-3p_L-3R-1_1ss4GT
MIPF0001641	MIR5179	osa-miR5179
MIPF0001742	MIR5079	osa-MIR5079a-p3_2ss6GT19TC_1,osa-MIR5079a-p3_2ss6GT19TC_2,osa-MIR5079a-p3_2ss4GT17TC,osa-MIR5079a-p3_2ss5GT18TC
MIPF0001743	MIR1511	ppe-miR1511-3p_L+1R-4
MIPF0001899	MIR8775	gra-MIR8776d-p5_2ss15TG18GT
MIPF0001975	MIR5302	sly-miR5302a_R-2_1ss6AG
MIPF0002033	MIR7757	bdi-MIR7757-p3_2ss7TG19CT_2,bdi-MIR7757-p5_2ss7TG19CT_2,bdi-MIR7757-p3_2ss7TG19CT_1,bdi-MIR7757-p5_2ss7TG19CT_1
