# Supplementary material for: Integration of mRNA and miRNA Analysis Reveals the Post-Transcriptional Regulation of Salt Stress Response in Hemerocallis fulva
Source: Int J Mol Sci. 2023 Apr 14;24(8):7290. doi: 10.3390/ijms24087290 (PMC10139057; doi:10.3390/ijms24087290)
Supplement: Supplementary file 1 [file ijms-24-07290-s001.zip › Table S6.xlsx]

## Sheet: Sheet1
Table S6 The high expression miRNAs identified in H. fulva
miR_name	NT_leaf1(norm)	NT_leaf2(norm)	NT_leaf3(norm)	NaCl_leaf1(norm)	NaCl_leaf2(norm)	NaCl_leaf3(norm)	NT_root1(norm)	NT_root2(norm)	NT_root3(norm)	NaCl_root1(norm)	NaCl_root2(norm)	NaCl_root3(norm)
aof-miR156a	1806.91	4269.46	272.644	1419.16	476.746	777.349	1090.12	1101.21	617.611	2503.25	3463.5	1913.88
aof-miR159	25647.4	26530.3	6146.67	26506	15207.4	25389.1	28938	34102.6	3542.42	14831.8	11706.1	7603.42
aof-miR159_1ss20TC	360.971	330.954	250.735	347.689	682.587	210.263	349.517	456.242	199.211	420.601	793.814	403.343
aof-miR159_R+1	519.538	755.246	294.553	583.056	401.035	438.247	554.359	643.089	168.958	359.546	415.606	159.601
aof-miR159_R-1_1ss20TC	5515.25	4282.57	3198.7	6187.47	6207.17	6137.37	13205.1	16360.7	4841.57	14205.4	16629.2	18491
aof-MIR159-p3_1ss9TA	630.843	621.034	1046.76	546.368	371.46	603.487	1772.2	2643.6	2770.69	483.917	338.694	257.766
aof-miR164	1988.08	1862.19	311.593	1866.38	1010.28	2311.45	465.202	431.409	39.9563	547.233	927.88	836.737
aof-miR164_1ss20CA	1249.36	660.078	114.413	1798.65	625.803	1426.82	75.7561	43.8431	0	79.1453	155.94	223.041
aof-miR164_2ss20CT21AT	466.454	163.494	53.5551	546.18	215.305	552.238	276.222	123.48	25.6862	153.768	120.307	165.611
aof-miR166a	759.615	845.534	462.521	834.603	405.767	754.838	3830.47	2395.1	3584.66	1659.79	1061.24	808.69
aof-miR166a_L-2R+2_1	1865.82	345.9	827.67	1719.25	865.951	1622.71	2687.29	1937.66	2480.72	2528.13	2461.17	2267.8
aof-miR166a_L-2R+2_1ss19TC	1020.92	2859.01	53.5551	1338.26	184.547	433.936	954.472	212.194	84.4791	230.652	711.61	769.291
aof-miR166a_L-2R+2_2	1865.82	345.9	827.67	1719.25	865.951	1622.71	2687.29	1937.66	2480.72	2528.13	2461.17	2267.8
aof-miR166c_3ss17CT20CT21CT	1025.72	1883.84	90.0699	955.391	162.07	537.391	173.118	56.174	293.394	117.587	240.261	203.675
aof-MIR166c-p3	333.23	736.944	0	233.862	15.3789	34.006	21.332	9.41941	14.2701	0	8.82015	4.67451
aof-miR167b	6069.38	12439	1562.84	4708.85	3372.71	1735.26	4866.71	893.303	727.776	4332.64	3793.02	6468.85
aof-miR167c	305.147	788.494	165.534	191.154	157.338	190.625	135.65	56.174	364.174	461.304	316.82	466.115
aof-miR168a	6128.63	12836.1	713.257	10491.1	2181.44	3906.38	1467.26	2525.77	149.551	520.097	1115.93	727.22
aof-miR168b_R-1_1ss20TA	1805.2	848.584	581.803	767.436	347.8	453.573	92.1653	136.325	142.13	74.6227	89.2599	114.192
aof-miR171a	1975.75	425.207	1526.32	1577.96	1671.57	1291.75	0	0	0	0	3.52806	0
aof-miR171b_L-1R+2_1ss9CG	0	0	0	0.940716	7.09796	0	912.902	684.534	113.59	343.717	458.648	416.699
aof-miR171c	1474.02	759.211	657.267	982.672	634.084	937.321	246.959	216.304	135.852	402.51	476.641	460.105
aof-miR172	697.626	286.725	185.009	680.702	657.744	353.471	612.612	297.996	158.684	619.594	528.503	662.445
aof-miR319a	60.961	98.5236	0	65.2857	23.6599	21.5531	611.518	5481.41	659.28	542.71	979.742	109.517
aof-miR319b_2ss20CT21TC	640.09	258.663	148.494	750.315	370.277	1026.89	209.765	160.815	17.695	305.275	494.281	410.021
aof-miR393b_L+1R-1	926.059	651.842	939.649	504.036	759.482	266.78	21.6055	39.219	25.1154	24.8742	31.0469	43.4061
aof-miR395a_R-1	3.42477	22.572	0	1000.36	1793.42	468.421	3.00836	10.7895	0	0	0	0
aof-miR395a_R-2	2.05486	13.7262	12.1716	758.97	2568.28	478.958	0	3.08272	0	0	0	0
aof-miR396a	2071.99	1565.4	2149.51	2538.05	3551.35	1263.01	2081.24	1051.72	632.452	1320.6	2170.46	2028.07
aof-miR396b	417.822	309.907	1548.23	668.097	1465.73	352.992	924.388	858.023	3287.27	1842.95	1173.43	1308.19
aof-miR396b_1ss21GA	205.144	40.8736	267.776	156.723	334.787	143.208	4927.97	2879.94	899.589	4656	15175.6	10443.5
aof-miR396b_R-1	39.0424	17.6915	367.583	26.9045	106.469	45.98	152.606	126.049	2143.37	1049.24	591.656	889.492
aof-miR827	454.81	937.347	216.655	247.973	559.556	342.934	29.5367	35.1087	98.1785	54.271	49.3928	34.7249
aof-miR827_1ss8AG	980.17	1587.36	404.098	667.72	1019.74	668.146	77.6705	165.268	218.048	126.632	58.213	20.0336
bdi-miR7782-3p_R-5_1ss3CG	14.384	10.3709	99.8072	22.7653	22.4769	43.5852	431.563	287.378	2776.4	373.113	238.144	156.93
gma-MIR5368-p3_2ss1AT18CA	29.4531	281.54	990.769	59.4533	13.0129	3.35271	0	0	74.2046	0	0	0
gma-miR6300	23.9734	37.2132	572.066	28.5978	63.8816	124.05	1486.41	2049.66	345.337	1867.83	885.896	357.934
gma-miR6300_L-1R+5	20.2062	39.6535	669.439	12.6056	9.46395	15.8056	24.8874	18.4963	385.864	126.632	116.073	68.1143
gma-miR6300_L-1R+6	0	5.18545	567.197	1.50515	0	0	7.38416	0.85631	541.123	24.8742	7.40893	12.688
gma-miR6300_L-1R+7	8.21946	16.7765	2125.16	1.12886	11.8299	0	17.2297	1.02757	494.888	65.5775	20.8156	28.0471
gma-miR6300_L-1R+8	20.5486	59.1752	1923.12	30.2911	13.0129	13.4108	57.4324	10.2757	1259.77	20.3516	16.9347	25.3759
gma-miR6300_R+7	3.42477	14.0312	1268.28	6.58501	20.1109	13.8898	31.998	44.8707	78.2003	40.7033	30.6941	36.7283
lja-miR171c_2ss8AG10TC	380.15	779.038	73.0297	410.529	304.029	428.188	4310.16	3693.27	221.472	1383.91	1035.49	649.757
lus-miR828a	364.396	130.856	528.248	308.931	600.961	187.273	29.2632	131.529	14.2701	18.0903	19.4043	12.0202
mtr-miR319a-3p	55.8238	88.7627	0	61.3347	23.6599	18.6794	484.347	1199.01	613.045	456.781	891.188	91.4868
osa-MIR159e-p5_2ss18AC21AC	60.276	151.903	0	96.3293	18.9279	29.6954	369.208	148.313	594.779	158.291	340.105	540.907
osa-miR162a	589.061	700.036	589.106	948.618	670.757	580.018	944.079	851.515	1861.97	585.675	633.287	357.934
osa-miR166d-5p	1502.45	2086.99	399.229	1772.31	324.14	1412.45	336.116	505.052	1107.93	58.7936	55.0377	38.0639
osa-miR168a-3p_L-3_1ss19GC	451.385	1278.98	170.403	944.855	457.818	488.537	1171.07	1509.33	167.246	486.178	414.547	478.135
osa-MIR171g-p5_2ss5GA21TG_1	0	0	0	0	0	0	580.067	724.61	452.648	203.516	154.882	231.722
osa-MIR171g-p5_2ss5GA21TG_2	0	0	0	0	0	0	580.067	724.61	452.648	203.516	154.882	231.722
osa-miR396a-3p_R+1	32.1929	10.981	136.322	55.6904	68.6136	210.263	489.543	1523.2	138.706	47.4872	98.4329	38.7316
osa-MIR444b-p5	482.208	474.926	194.746	492.183	194.011	798.423	377.413	1888.34	98.7493	330.149	861.2	231.054
osa-miR5077_L-1_1ss5GA	175.006	240.056	3089.16	117.966	126.58	124.05	194.997	282.411	1061.7	486.178	582.836	154.927
osa-miR528-5p	1044.56	1101.45	340.805	2612.37	1303.66	1437.35	164.913	76.5541	6.84966	492.962	1084.88	2868.14
PC-3p-1469_1942	223.98	946.803	0	159.545	28.3918	9.57916	0	0	0	0	0	0
PC-3p-182_17973	4717.28	6037.09	2419.72	3472.75	2032.38	1289.35	456.724	389.45	645.01	416.078	434.657	512.86
PC-3p-490_6394	119.867	184.236	107.11	761.98	113.567	446.868	38.5617	25.3468	3.99563	22.6129	32.1053	79.4666
PC-3p-767_3820	128.429	350.171	1509.28	122.858	110.018	265.343	56.8854	143.175	296.819	228.391	450.181	215.027
PC-5p-1255_2277	97.9485	140.922	579.369	243.457	224.769	119.739	277.316	239.767	236.313	40.7033	55.7434	32.0538
PC-5p-1494_1921	11.9867	533.492	0	13.17	0	0	3.00836	9.59067	0	0	0	0
PC-5p-166_19100	19.8637	61.9204	0	3462.21	3138.48	1042.69	1.64093	12.1596	0	27.1355	2.11684	0
PC-5p-274_11288	659.954	295.876	1735.67	685.03	1408.95	283.543	537.13	1068.85	1268.9	676.127	757.827	378.635
PC-5p-361_8563	4.79468	14.6413	0	1174.01	496.857	974.679	0	4.11029	0	0	0	0
PC-5p-791_3683	5.13716	21.3519	0	508.551	1440.89	276.359	0	3.5965	0	13.5678	0	0
peu-MIR2916-p3_1ss7TC	664.406	1369.57	2663.15	856.052	624.62	773.038	16258.8	2289.43	4739.96	16267.7	1563.64	17261
peu-MIR2916-p5_1ss6AG	619.199	1425.08	6071.2	733.759	428.244	923.431	10964.1	1845.86	12266.6	15688.9	2927.58	12625.2
ptc-miR156g	4.79468	53.0746	0	12.0412	0	34.485	60.7142	118.513	90.1872	447.736	891.894	522.209
ptc-miR6478_R-1	31.5079	190.337	725.428	22.0128	132.495	6.70541	255.984	372.837	579.938	737.182	1360.77	270.454
ptc-miR6478_R-2	6.16459	43.3138	90.0699	1.88143	14.1959	6.70541	140.573	77.753	140.418	271.355	715.138	150.92
vca-miR168b-3p_2ss3CT12CT	3760.74	10545.1	1226.9	6640.89	2315.12	2497.77	1267.34	1441.17	379.015	303.013	560.256	497.501
vvi-miR3630-3p_L-2	3.76725	3.96535	82.767	3.01029	0	10.5371	8.7516	5.65165	606.195	47.4872	21.874	14.6913
vvi-miR3630-3p_L-2_1ss22CT	0	1.83016	214.22	2.63401	0	6.70541	12.8539	5.13786	795.131	122.11	65.9747	56.0941
vvi-miR3630-3p_L-2R-1_1ss20CT	0	5.79551	158.231	0.940716	0	19.1583	12.8539	7.02174	1492.08	76.884	43.0423	25.3759
vvi-miR3630-3p_L-3	0	5.18545	116.847	1.50515	0	6.22645	8.20463	4.11029	624.461	58.7936	38.1031	22.037
vvi-miR3630-3p_L-4	0	3.35529	258.038	1.12886	10.6469	4.31062	6.01673	3.5965	1068.55	88.1904	69.15	53.423
