# Supplementary material for: Integration of mRNA and miRNA Analysis Reveals the Post-Transcriptional Regulation of Salt Stress Response in Hemerocallis fulva
Source: Int J Mol Sci. 2023 Apr 14;24(8):7290. doi: 10.3390/ijms24087290 (PMC10139057; doi:10.3390/ijms24087290)
Supplement: Supplementary file 1 [file ijms-24-07290-s001.zip › Table S7.xlsx]

## Sheet: Table S7 DE miRNAs in leaf
Table S7 Differential expression miRNAs identified in H. fulva under NaCl treatment
red is pvalue<0.001,orange is pvalue <0.01,blue is pvalue<0.05,green is pvalue <0.1.								-2.32193
Index	miR_name	miR_seq	up/down	fold_change(NaCl_leaf(mean)/NT_leaf(mean))	log2(fold_change)	pvalue(t_test)	NT_leaf(mean)	NaCl_leaf(mean)	NT_leaf/NT_leaf1(norm)	NT_leaf/NT_leaf2(norm)	NT_leaf/NT_leaf3(norm)	NaCl_leaf/NaCl_leaf1(norm)	NaCl_leaf/NaCl_leaf2(norm)	NaCl_leaf/NaCl_leaf3(norm)	NT_leaf/NT_leaf1(raw)	NT_leaf/NT_leaf2(raw)	NT_leaf/NT_leaf3(raw)	NaCl_leaf/NaCl_leaf1(raw)	NaCl_leaf/NaCl_leaf2(raw)	NaCl_leaf/NaCl_leaf3(raw)	Expression level
1	ata-miR395a-5p_2ss6CT21GT	GTTCCTTTCAAGCACTTCAGT	up	inf	inf	0.0307841	0	58.6741	0	0	0	38.3812	63.8816	73.7595	0	0	0	102	27	77	middle
2	aof-miR393a	TCCAAAGGGATCGCATTGATTC	down	0.207139	-2.27133	0.0436544	10.8995	2.25772	9.24689	8.84577	14.6059	6.77316	0	0	13.5	14.5	3	18	0	0	middle
3	PC-5p-361_8563	GTTCCTCCCAACCACTTCAGT	up	136.116	7.0887	0.0487906	6.47865	881.85	4.79468	14.6413	0	1174.01	496.857	974.679	7	24	0	3120	210	1017.5	high
Following miRNAs do not show significant difference (p-value<0.05).
4	hbr-MIR6173-p3_1ss4CT_2	CAGTGCTGTAGCTAACGCGTT	down	0.106316	-3.23357	0.0578853	31.104	3.30684	17.4663	32.0278	43.8178	7.52573	0	2.39479	25.5	52.5	9	20	0	2.5	middle
5	hbr-MIR6173-p3_1ss4CT_1	CAGTGCTGTAGCTAACGCG	down	0.106316	-3.23357	0.0578853	31.104	3.30684	17.4663	32.0278	43.8178	7.52573	0	2.39479	25.5	52.5	9	20	0	2.5	middle
6	hbr-MIR6173-p5_1ss4CT	CAGTGCTGTAGCTAACGCG	down	0.106316	-3.23357	0.0578853	31.104	3.30684	17.4663	32.0278	43.8178	7.52573	0	2.39479	25.5	52.5	9	20	0	2.5	middle
7	osa-miR395b_L+1R-1_1ss2GC	TCTGAAGTGTTTGGGGGAACT	up	inf	inf	0.0589334	0	23.8468	0	0	0	25.9638	33.1238	12.4529	0	0	0	69	14	13	middle
8	aof-miR395a_L+2R-2	TCTGAAGTGTTTGGGGGAACT	up	inf	inf	0.0589334	0	23.8468	0	0	0	25.9638	33.1238	12.4529	0	0	0	69	14	13	middle
9	PC-3p-13000_225	CAAGCCTTCACTTTGCACATC	down	0.345938	-1.53141	0.0709158	8.76812	3.03322	6.50707	7.62567	12.1716	5.26801	0	3.83166	9.5	12.5	2.5	14	0	4	middle
10	aof-miR395a_L+1R-1	CTGAAGTGTTTGGGGGAACTC	up	inf	inf	0.0733797	0	4.73211	0	0	0	4.70358	7.09796	2.39479	0	0	0	12.5	3	2.5	low
11	aof-miR408	TGCACTGCCTCTTCCCTGGCT	up	1.84406	0.882889	0.0778056	102.468	188.958	55.8238	98.2186	153.362	226.713	149.057	191.104	81.5	161	31.5	602.5	63	199.5	middle
12	PC-5p-166_19100	GTTTCTCCCAACCACTTCAGT	up	93.4581	6.54625	0.0797444	27.2614	2547.79	19.8637	61.9204	0	3462.21	3138.48	1042.69	29	101.5	0	9201	1326.5	1088.5	high
13	gma-MIR395i-p3_1ss14TA_2	TTGGGGGAACTCTAGGGCTCA	up	41.403	5.37166	0.0857264	1.22011	50.516	0	3.66032	0	79.7727	44.9537	26.8216	0	6	0	212	19	28	middle
14	gma-MIR395i-p3_1ss14TA_1	TTGGGGGAACTCTAGGGCTC	up	41.403	5.37166	0.0857264	1.22011	50.516	0	3.66032	0	79.7727	44.9537	26.8216	0	6	0	212	19	28	middle
15	gma-miR4995_L-2	GCAGTGGCTTGGTTAAGGG	down	0.125064	-2.99926	0.0924759	21.0612	2.63401	9.24689	32.0278	21.9089	7.90202	0	0	13.5	52.5	4.5	21	0	0	middle
16	PC-3p-10789_271	TCTCCTCTGTATTCCTCCTCC	up	3.48259	1.80016	0.100593	5.60989	19.537	11.6442	5.18545	0	29.5385	11.8299	17.2425	17	8.5	0	78.5	5	18	middle
17	PC-5p-71476_34	ACTAGTGTGGTAGAAAGAACT	down	-inf	-inf	0.102851	28.5919	0	12.3292	46.6691	26.7776	0	0	0	18	76.5	5.5	0	0	0	middle
18	aof-miR395a_R-1	TGAAGTGTTTGGGGGAACTC	up	125.485	6.97137	0.107202	8.66558	1087.4	3.42477	22.572	0	1000.36	1793.42	468.421	5	37	0	2658.5	758	489	high
19	aof-miR159_R-1_1ss20TC	TTTGGATTGAAGGGAGCTCC	up	1.42592	0.511892	0.11007	4332.18	6177.33	5515.25	4282.57	3198.7	6187.47	6207.17	6137.37	8052	7020	657	16443.5	2623.5	6407	high
20	vca-miR167a-3p_L-1R+1_1ss11GT	AGATCATGTTGCAGTTTCATC	down	0.137722	-2.86017	0.120242	14.0761	1.93859	4.45221	18.3016	19.4746	1.50515	0	4.31062	6.5	30	4	4	0	4.5	middle
21	vca-miR167b-3p	AGATCATGTTGCAGTTTCATC	down	0.137722	-2.86017	0.120242	14.0761	1.93859	4.45221	18.3016	19.4746	1.50515	0	4.31062	6.5	30	4	4	0	4.5	middle
22	aof-miR159_L+1R-1_1ss21TC	CTTTGGATTGAAGGGAGCTCC	up	3.86045	1.94877	0.127365	1.40917	5.44001	2.39734	1.83016	0	5.6443	8.28095	2.39479	3.5	3	0	15	3.5	2.5	middle
23	PC-5p-53154_49	GTTCCTCCCAACCACTTCA	up	inf	inf	0.129091	0	10.3965	0	0	0	3.38658	17.7449	10.0581	0	0	0	9	7.5	10.5	middle
24	hbr-miR6173_L-2	CCGTAAACGATGGATACT	down	0.111724	-3.16199	0.134844	15.7174	1.756	4.79468	25.3172	17.0403	5.26801	0	0	7	41.5	3.5	14	0	0	middle
25	osa-miR528-5p	TGGAAGGGGCATGCAGAGGAG	up	2.15271	1.10615	0.135208	828.937	1784.46	1044.56	1101.45	340.805	2612.37	1303.66	1437.35	1525	1805.5	70	6942.5	551	1500.5	high
26	osa-MIR395i-p3_2ss14TG17TC	TTGGGGGAACTCTGGGCACC	up	inf	inf	0.136395	0	83.3538	0	0	0	82.9712	143.142	23.9479	0	0	0	220.5	60.5	25	middle
27	aof-miR393b_L+1R-1	TTCCAAAGGGATCGCATTGATC	down	0.607852	-0.718208	0.136585	839.183	510.099	926.059	651.842	939.649	504.036	759.482	266.78	1352	1068.5	193	1339.5	321	278.5	high
28	hbr-MIR6173-p5_1ss18AG	ATACCCCAGTAGTCCTAG	down	0.0766058	-3.7064	0.142175	9.82397	0.752573	2.05486	12.8111	14.6059	2.25772	0	0	3	21	3	6	0	0	middle
29	hbr-MIR6173-p3_1ss18AG	ATACCCCAGTAGTCCTAG	down	0.0766058	-3.7064	0.142175	9.82397	0.752573	2.05486	12.8111	14.6059	2.25772	0	0	3	21	3	6	0	0	middle
30	PC-5p-4876_604	GAGAAAATAACAGATGTAAAGAGG	down	0.47495	-1.07415	0.142979	38.9095	18.4801	30.823	39.6535	46.2521	36.8761	9.46395	9.1002	45	65	9.5	98	4	9.5	middle
31	aof-miR395a	TGAAGTGTTTGGGGGAACTCT	up	inf	inf	0.143135	0	45.393	0	0	0	27.2808	83.9925	24.9058	0	0	0	72.5	35.5	26	middle
32	aof-miR395a_R-1_1ss20CT	TGAAGTGTTTGGGGGAACTT	up	inf	inf	0.154648	0	57.3416	0	0	0	52.1157	104.103	15.8056	0	0	0	138.5	44	16.5	middle
33	gma-miR4995_L-1R-2	GGCAGTGGCTTGGTTAAG	down	0.0763419	-3.71138	0.158651	188.742	14.409	86.6468	133.907	345.674	9.59531	30.7578	2.87375	126.5	219.5	71	25.5	13	3	middle
34	aof-MIR396b-p5	TATTTTTCCACAGCTTTCTTG	up	3.70741	1.89041	0.166781	2.78088	10.3099	3.76725	4.5754	0	10.536	16.5619	3.83166	5.5	7.5	0	28	7	4	middle
35	gma-MIR5368-p5_1ss12CA	ACCACTCTGGAAGAGCTAG	down	0.129608	-2.94777	0.173922	169.026	21.9071	35.2752	189.422	282.381	47.9765	17.7449	0	51.5	310.5	58	127.5	7.5	0	middle
36	PC-5p-791_3683	GTTTCTCCCAATCACTTCAGT	up	84.0271	6.39278	0.175517	8.82967	741.932	5.13716	21.3519	0	508.551	1440.89	276.359	7.5	35	0	1351.5	609	288.5	high
37	PC-3p-182_17973	TTGCGTAGGCTGTAATGTGGC	down	0.515746	-0.955267	0.175563	4391.36	2264.83	4717.28	6037.09	2419.72	3472.75	2032.38	1289.35	6887	9896	497	9229	859	1346	high
38	aof-miR395a_R-3	TGAAGTGTTTGGGGGAAC	up	123.785	6.95169	0.176666	1.3842	171.343	1.71239	2.44021	0	133.205	330.055	50.7695	2.5	4	0	354	139.5	53	middle
39	ptc-MIR166e-p5_2ss19TA21TC	GATTGTCGTCTGGTTCGAAGC	down	0.434082	-1.20396	0.178006	31.0364	13.4723	40.0698	38.4334	14.6059	27.0926	7.09796	6.22645	58.5	63	3	72	3	6.5	middle
40	PC-3p-110493_19	AATCAATCACATGTATGCCACATC	up	inf	inf	0.183549	0	3.2271	0	0	0	4.89172	0	4.78958	0	0	0	13	0	5	low
41	PC-3p-169087_10	TAACTGAGGACGTAGTTGTGA	down	-inf	-inf	0.184866	2.15835	0	3.42477	3.05027	0	0	0	0	5	5	0	0	0	0	low
42	osa-miR156c-3p_L+3R-3_1ss16CT	CGTGCTCACTTCTCTTTCTGTC	down	-inf	-inf	0.185098	2.67921	0	3.76725	4.27037	0	0	0	0	5.5	7	0	0	0	0	low
43	aof-miR396b_R+1_1	TTCCACAGCTTTCTTGAACTGA	up	3.54954	1.82763	0.185586	2.78088	9.87086	3.76725	4.5754	0	9.21902	16.5619	3.83166	5.5	7.5	0	24.5	7	4	middle
44	aof-miR396b_R+1_2	TTCCACAGCTTTCTTGAACTGC	up	3.54954	1.82763	0.185586	2.78088	9.87086	3.76725	4.5754	0	9.21902	16.5619	3.83166	5.5	7.5	0	24.5	7	4	middle
45	ath-MIR406-p3_2ss4AG18TG	AAAGCGAGTCTTCATAGG	down	-inf	-inf	0.186487	2.24754	0	3.0823	3.66032	0	0	0	0	4.5	6	0	0	0	0	low
46	gma-miR4995_L-1R-1	GGCAGTGGCTTGGTTAAGG	down	0.108893	-3.19902	0.187767	75.7073	8.24398	24.3159	61.6154	141.191	10.536	14.1959	0	35.5	101	29	28	6	0	middle
47	PC-3p-3831_768	TTGAGAATTCAAAGAGTGAGG	down	0.400924	-1.3186	0.189039	91.6954	36.7629	62.3309	149.463	63.2924	50.7987	50.8687	8.62124	91	245	13	135	21.5	9	middle
48	gma-MIR5368-p5_1ss7TC	ACTGTTCCCTGGGATTGGCTTTG	down	0.254725	-1.97299	0.189998	48.364	12.3195	19.5212	84.1873	41.3835	31.0436	5.91497	0	28.5	138	8.5	82.5	2.5	0	middle
49	ath-miR395a_L+2	CACTGAAGTGTTTGGGGGAACTC	up	inf	inf	0.191227	0	45.7182	0	0	0	59.077	78.0776	0	0	0	0	157	33	0	middle
50	gma-MIR395i-p3_1ss14TG	TTGGGGGAACTCTGGGGCTC	up	inf	inf	0.192766	0	8.3515	0	0	0	16.7447	5.91497	2.39479	0	0	0	44.5	2.5	2.5	middle
51	aof-miR395a_R-2	TGAAGTGTTTGGGGGAACT	up	136.166	7.08922	0.194332	9.31756	1268.74	2.05486	13.7262	12.1716	758.97	2568.28	478.958	3	22.5	2.5	2017	1085.5	500	high
52	mtr-MIR2600a-p5_2ss6GC18CA	AGAGACAGAAACACAAAAA	down	0.0423032	-4.56309	0.198563	7.4125	0.313572	0	10.0659	12.1716	0.940716	0	0	0	16.5	2.5	2.5	0	0	middle
53	mtr-MIR2600a-p3_2ss6GC18CA	AGAGACAGAAACACAAAAA	down	0.0423032	-4.56309	0.198563	7.4125	0.313572	0	10.0659	12.1716	0.940716	0	0	0	16.5	2.5	2.5	0	0	middle
54	aof-MIR159-p3_1ss9TA	AGCTGCTTAGTCATGGATTC	down	0.661834	-0.595459	0.198881	766.212	507.105	630.843	621.034	1046.76	546.368	371.46	603.487	921	1018	215	1452	157	630	high
55	gma-MIR5368-p5_1ss14CA	ATACCACTCTGGAAGAGCTAG	down	0.129499	-2.94899	0.200629	188.211	24.3731	27.0557	208.943	328.634	47.0358	21.2939	4.78958	39.5	342.5	67.5	125	9	5	middle
56	PC-5p-60559_42	TGGAGGCAGCGGCTTATCGATC	up	inf	inf	0.200721	0	1.58506	0	0	0	1.88143	0	2.87375	0	0	0	5	0	3	low
57	aof-MIR479-p5_2ss12TG22TG	TGTGATGTTGGGTCGGCTCATG	up	1.87217	0.904713	0.20393	67.1258	125.671	104.456	65.2757	31.6462	177.419	69.7966	129.798	152.5	107	6.5	471.5	29.5	135.5	middle
58	aof-miR319b_2ss20CT21TC	TTTGGACTGAAGGGAGCTCTC	up	2.05059	1.03604	0.20776	349.082	715.826	640.09	258.663	148.494	750.315	370.277	1026.89	934.5	424	30.5	1994	156.5	1072	high
59	gma-MIR4995-p3_1ss21GC	CAGTGGCTTGGTTAAGGGAACC	down	0.175815	-2.50787	0.21085	33.8872	5.95787	4.45221	58.2601	38.9492	17.8736	0	0	6.5	95.5	8	47.5	0	0	middle
60	aof-miR395a_1ss21TA	TGAAGTGTTTGGGGGAACTCA	up	inf	inf	0.212527	0	95.7641	0	0	0	66.0383	198.743	22.511	0	0	0	175.5	84	23.5	middle
61	osa-miR164c	TGGAGAAGCAGGGTACGTGCA	up	inf	inf	0.21293	0	2.25216	0	0	0	2.44586	0	4.31062	0	0	0	6.5	0	4.5	middle
62	PC-3p-120575_17	AAGATCATGCCTTCCTTTTGGAAT	up	inf	inf	0.214759	0	11.9279	0	0	0	12.7937	0	22.99	0	0	0	34	0	24	middle
63	gma-MIR5368-p3_1ss17CT	GAATTCTAACCTTGTGTCAGGA	down	0.11281	-3.14804	0.215183	223.28	25.1881	22.946	240.361	406.532	40.0745	35.4898	0	33.5	394	83.5	106.5	15	0	middle
64	gma-MIR5368-p5_1ss17CT	GAATTCTAACCTTGTGTCAGGA	down	0.11281	-3.14804	0.215183	223.28	25.1881	22.946	240.361	406.532	40.0745	35.4898	0	33.5	394	83.5	106.5	15	0	middle
65	PC-5p-16373_179	AAACTATTTGAGGCTTATACCATT	up	3.49014	1.80329	0.216696	3.5818	12.501	3.42477	7.32064	0	16.1803	18.9279	2.39479	5	12	0	43	8	2.5	middle
66	PC-3p-71640_34	TACTAAAAGACAAGCTCCATA	down	0.101205	-3.30465	0.216779	6.19679	0.627144	8.21946	10.3709	0	1.88143	0	0	12	17	0	5	0	0	middle
67	PC-3p-126297_16	ATTGGCGATAGCGGCAACAGG	down	-inf	-inf	0.2233	3.37845	0	3.42477	6.71059	0	0	0	0	5	11	0	0	0	0	low
68	osa-miR395x_L-1R+1_1ss16TA	TGAAGTGTTTGGAGAAGCTCC	up	inf	inf	0.225139	0	21.7702	0	0	0	14.8633	46.1367	4.31062	0	0	0	39.5	19.5	4.5	middle
69	PC-5p-93317_24	TCTATCAACTGAGGCCGCAGT	down	0.153397	-2.70466	0.227196	2.04419	0.313572	3.0823	3.05027	0	0.940716	0	0	4.5	5	0	2.5	0	0	low
70	PC-3p-106860_20	TTTGAATATCAGAACACTTGG	down	-inf	-inf	0.229407	4.21682	0	4.10973	8.54075	0	0	0	0	6	14	0	0	0	0	low
71	PC-3p-75123_32	TGGGCCGGGCCATACACAAGC	down	0.12082	-3.04907	0.230797	4.1526	0.501715	5.13716	7.32064	0	1.50515	0	0	7.5	12	0	4	0	0	low
72	PC-3p-46867_57	TTTTGAACCCCAAGACTCGCT	up	6.46914	2.69357	0.234223	2.16902	14.0317	6.50707	0	0	18.6262	0	23.4689	9.5	0	0	49.5	0	24.5	middle
73	PC-5p-90869_25	TTAAGGGTGTTAAAGATTATC	down	0.146984	-2.76627	0.235072	4.26676	0.627144	5.47964	7.32064	0	1.88143	0	0	8	12	0	5	0	0	low
74	PC-5p-87702_26	TATGACAAATCCGAATCGTTCA	up	4.58754	2.19772	0.236256	1.59823	7.33193	4.79468	0	0	3.01029	14.1959	4.78958	7	0	0	8	6	5	middle
75	gma-miR164a_R+3	TGGAGAAGCAGGGCACGTGCACCA	up	inf	inf	0.236835	0	3.23857	0	0	0	3.01029	0	6.70541	0	0	0	8	0	7	low
76	PC-5p-132593_15	GTTATATGGTCGAATGGGTA	down	-inf	-inf	0.237712	1.64997	0	3.42477	1.52513	0	0	0	0	5	2.5	0	0	0	0	low
77	PC-3p-78504_30	TAAATGATTAGGTTGTAAACG	down	-inf	-inf	0.237712	2.30996	0	4.79468	2.13519	0	0	0	0	7	3.5	0	0	0	0	middle
78	PC-5p-23230_125	TGTTGGCCCGGTTCAAATCAGA	up	5.43679	2.44276	0.243389	1.97996	10.7646	4.10973	1.83016	0	15.0515	0	17.2425	6	3	0	40	0	18	middle
79	PC-3p-490_6394	CCTCTGTATTCCTCCTCCACT	up	3.21589	1.68522	0.244935	137.071	440.805	119.867	184.236	107.11	761.98	113.567	446.868	175	302	22	2025	48	466.5	high
80	aof-miR393a_1ss22CT	TCCAAAGGGATCGCATTGATTT	down	0.393689	-1.34487	0.246562	22.5333	8.87112	10.9593	17.6915	38.9492	12.4175	14.1959	0	16	29	8	33	6	0	middle
81	ata-miR172c-5p_R-2_1ss7TC	GTGGCACCATCAAGATTCACA	up	2.4629	1.30036	0.247855	69.8324	171.991	93.1538	43.3138	73.0297	193.788	52.0517	270.132	136	71	15	515	22	282	middle
82	ptc-miR6478_R-2	CCGACCTTAGCTCAGTTGG	down	0.163261	-2.61475	0.24847	46.5161	7.59425	6.16459	43.3138	90.0699	1.88143	14.1959	6.70541	9	71	18.5	5	6	7	high
83	PC-3p-110651_19	TAAAAGACAAGCCCATGTATG	down	-inf	-inf	0.249246	1.99425	0	1.71239	4.27037	0	0	0	0	2.5	7	0	0	0	0	low
84	bdi-miR399d	TGCCAAAGGAGATTTGCCCGG	up	inf	inf	0.251532	0	10.2289	0	0	0	8.65459	0	22.0321	0	0	0	23	0	23	middle
85	aof-MIR408-p3_2ss18GT19GT	TGCACTGCCTCTTCCCTTT	up	inf	inf	0.251532	0	1.11184	0	0	0	0.940716	0	2.39479	0	0	0	2.5	0	2.5	low
86	aof-MIR408-p5_2ss18GT19GT	TGCACTGCCTCTTCCCTTT	up	inf	inf	0.251532	0	1.11184	0	0	0	0.940716	0	2.39479	0	0	0	2.5	0	2.5	low
87	gma-MIR5368-p5_2ss14GA18AG_1	CAGCTTAGGTGGAAGGCGAAG	down	0.152355	-2.71449	0.251659	8.23265	1.25429	3.0823	4.5754	17.0403	3.76287	0	0	4.5	7.5	3.5	10	0	0	middle
88	gma-MIR5368-p5_2ss14GA18AG_2	CAGCTTAGGTGGAAGGCGAAGAA	down	0.152355	-2.71449	0.251659	8.23265	1.25429	3.0823	4.5754	17.0403	3.76287	0	0	4.5	7.5	3.5	10	0	0	middle
89	hbr-MIR6173-p5_1ss1CT	TGCTGTAGCTAACGCGTT	down	0.125731	-2.99158	0.252107	63.2644	7.95432	17.4663	40.8736	131.453	12.2293	8.28095	3.35271	25.5	67	27	32.5	3.5	3.5	middle
90	gma-MIR5368-p3_1ss17CA	GAGATACCACTCTGGAAG	down	0.106249	-3.23448	0.253014	228.965	24.3273	32.5353	182.101	472.259	44.59	28.3918	0	47.5	298.5	97	118.5	12	0	middle
91	stu-MIR395h-p3_1ss6AC	TCCTGCAGTGTTTGGGGGAAC	up	inf	inf	0.254723	0	2.72423	0	0	0	2.25772	5.91497	0	0	0	0	6	2.5	0	low
92	vca-MIR391-p5_2ss1TC20CT	CTCGCAGGAGAGATGATGCT	down	0.229129	-2.12577	0.264328	9.85349	2.25772	13.6991	15.8614	0	6.77316	0	0	20	26	0	18	0	0	middle
93	osa-miR159d_R-1_1ss1AG	GTTGGATTGAAGGGAGCTCC	up	4.25245	2.0883	0.265053	0.610053	2.59422	0	1.83016	0	3.95101	0	3.83166	0	3	0	10.5	0	4	middle
94	PC-5p-74134_32	ATGAGAAAATAACAATAATGGAGT	up	inf	inf	0.266055	0	6.36255	0	0	0	4.89172	14.1959	0	0	0	0	13	6	0	middle
95	gma-miR4995_R-2	AGGCAGTGGCTTGGTTAAG	down	0.0863766	-3.53322	0.268539	125.927	10.8771	27.0557	75.6466	275.078	16.7447	13.0129	2.87375	39.5	124	56.5	44.5	5.5	3	middle
96	aof-miR168b_R-1_1ss20TA	TCGCTTGGTGCAGGTCGGGA	down	0.484861	-1.04436	0.270225	1078.53	522.937	1805.2	848.584	581.803	767.436	347.8	453.573	2635.5	1391	119.5	2039.5	147	473.5	high
97	aof-miR164_1ss20CA	TGGAGAAGCAGGGCACGTGAA	up	1.90294	0.928233	0.270528	674.616	1283.76	1249.36	660.078	114.413	1798.65	625.803	1426.82	1824	1082	23.5	4780	264.5	1489.5	high
98	PC-5p-121807_17	AAGACTAAGGTCGCTAGTGGGAAT	down	0.242139	-2.04609	0.270833	2.59002	0.627144	4.10973	3.66032	0	1.88143	0	0	6	6	0	5	0	0	low
99	PC-3p-3698_797	CATGTGCACTCCCTCTCCAGT	up	2.38799	1.2558	0.273338	24.6021	58.7495	42.1247	14.6413	17.0403	54.3734	21.2939	100.581	61.5	24	3.5	144.5	9	105	middle
100	PC-3p-93962_24	TTTGGGAATAATGGCATTAGT	down	0.15626	-2.67798	0.274503	4.01347	0.627144	4.10973	7.93069	0	1.88143	0	0	6	13	0	5	0	0	low
101	aof-miR164_1ss20CT	TGGAGAAGCAGGGCACGTGTA	up	2.10821	1.07602	0.275173	95.4579	201.245	195.212	74.1215	17.0403	243.269	74.5286	285.938	285	121.5	3.5	646.5	31.5	298.5	middle
102	aof-miR164_2ss20CT21AT	TGGAGAAGCAGGGCACGTGTT	up	1.92204	0.942641	0.275634	227.834	437.908	466.454	163.494	53.5551	546.18	215.305	552.238	681	268	11	1451.5	91	576.5	high
103	PC-3p-3483_850	TTGTTTCTCCACCATGGCTTCC	up	1.54216	0.624952	0.275662	94.9923	146.493	92.8114	65.5807	126.585	114.015	215.305	110.16	135.5	107.5	26	303	91	115	middle
104	gma-miR4995_R-1	AGGCAGTGGCTTGGTTAAGG	down	0.0498507	-4.32624	0.281041	167.872	8.36853	25.3433	96.0834	382.189	19.1906	5.91497	0	37	157.5	78.5	51	2.5	0	middle
105	mdm-miR395l_L-1R-1	TGAAGTGTTTGGGGGAACC	up	inf	inf	0.286049	0	2.53609	0	0	0	1.69329	5.91497	0	0	0	0	4.5	2.5	0	low
106	PC-5p-16293_180	TTTTTCAACTTCTTGACATGCA	down	0.175229	-2.51269	0.288682	10.0212	1.756	9.93184	20.1318	0	5.26801	0	0	14.5	33	0	14	0	0	middle
107	gma-MIR5368-p3_2ss1AT18CA	TGAGATACCACTCTGGAAG	down	0.0582433	-4.10176	0.291253	433.921	25.273	29.4531	281.54	990.769	59.4533	13.0129	3.35271	43	461.5	203.5	158	5.5	3.5	high
108	gma-MIR5368-p5_2ss1AT18CA	TGAGATACCACTCTGGAAG	down	0.0582433	-4.10176	0.291253	433.921	25.273	29.4531	281.54	990.769	59.4533	13.0129	3.35271	43	461.5	203.5	158	5.5	3.5	high
109	gma-MIR5368-p5_1ss22CT	AGCTAGAATTCTAACCTTGTGT	down	0.0707825	-3.82046	0.292754	35.4406	2.50858	7.5345	81.7471	17.0403	7.52573	0	0	11	134	3.5	20	0	0	middle
110	PC-3p-98298_22	AATGATCACTAAAAGACAAACTCC	down	-inf	-inf	0.292953	6.04949	0	1.71239	1.83016	14.6059	0	0	0	2.5	3	3	0	0	0	middle
111	PC-5p-88981_26	TGTGCAAACGCCTTAATTCGT	down	0.178469	-2.48625	0.293263	2.10841	0.376287	2.05486	4.27037	0	1.12886	0	0	3	7	0	3	0	0	low
112	ppe-miR1511-3p_L+1R-4	AACCTGGCTCTGATACCA	down	0.465576	-1.10291	0.293861	18.0674	8.41173	9.13273	14.2346	30.8348	13.4209	0	11.8143	13.3333	23.3333	6.33333	35.6667	0	12.3333	middle
113	aof-miR5139a_L-2	AACCTGGCTCTGATACCA	down	0.465576	-1.10291	0.293861	18.0674	8.41173	9.13273	14.2346	30.8348	13.4209	0	11.8143	13.3333	23.3333	6.33333	35.6667	0	12.3333	middle
114	aof-miR5139b_L-3	AACCTGGCTCTGATACCA	down	0.465576	-1.10291	0.293861	18.0674	8.41173	9.13273	14.2346	30.8348	13.4209	0	11.8143	13.3333	23.3333	6.33333	35.6667	0	12.3333	middle
115	mes-MIR393c-p3_1ss8GC	ATCATGCCATCCCTTTAGAAT	up	4.43009	2.14734	0.297075	1.01676	4.50432	0	3.05027	0	4.89172	0	8.62124	0	5	0	13	0	9	low
116	peu-MIR2916-p3_1ss7TC	AGGGATCGGCGGATGTTGCT	down	0.479806	-1.05948	0.29799	1565.71	751.237	664.406	1369.57	2663.15	856.052	624.62	773.038	970	2245	547	2275	264	807	high
117	PC-3p-6389_465	TCTTTGCCCTTGGTACAATTTC	down	0.658756	-0.602183	0.298474	29.664	19.5414	27.7407	36.9082	24.3432	32.7369	17.7449	8.14228	40.5	60.5	5	87	7.5	8.5	middle
118	cme-MIR160c-p5_2ss13AG17AG	AGCCATGCATGTGTAAGT	down	0.310713	-1.68635	0.300284	18.2792	5.67958	8.56193	9.76085	36.5148	3.01029	8.28095	5.7475	12.5	16	7.5	8	3.5	6	middle
119	PC-3p-57509_45	TGTGAATTCAAAGAGTGAGGA	down	-inf	-inf	0.301604	4.05273	0	2.39734	9.76085	0	0	0	0	3.5	16	0	0	0	0	low
120	aof-miR396a_1ss2TA	TACCACGGCTTTCTTGAACTG	up	inf	inf	0.304436	0	2.93042	0	0	0	1.69329	7.09796	0	0	0	0	4.5	3	0	low
121	osa-miR5179	TTTTGCTCAAGACCGCGCAAC	down	0.180299	-2.47153	0.307023	4.52185	0.815287	4.10973	9.45583	0	2.44586	0	0	6	15.5	0	6.5	0	0	middle
122	bdi-MIR7781-p3_2ss9CA17AG	TGAGGAAAAGAATTTGGTTT	down	0.0933998	-3.42044	0.307696	4.70024	0.439001	3.42477	10.6759	0	1.317	0	0	5	17.5	0	3.5	0	0	middle
123	PC-3p-5405_547	TCAAGACTAAGACTCGGTC	up	2.07972	1.05639	0.313117	23.6421	49.169	13.6991	8.54075	48.6865	13.9226	62.6986	70.8858	20	14	10	37	26.5	74	middle
124	mdm-miR169o_1ss20TA	TAGCCAGGGATGACTTGCCA	up	3.42769	1.77724	0.313773	0.813404	2.7881	0	2.44021	0	3.57472	0	4.78958	0	4	0	9.5	0	5	low
125	zma-miR395l-5p_R-2_1ss20CG	GTTCCTTCCAAACACTTCAG	up	inf	inf	0.314537	0	11.8196	0	0	0	3.01029	29.5748	2.87375	0	0	0	8	12.5	3	middle
126	csi-miR159b-5p_1ss1AT	TGCTGCCGACTCATTCATTCA	down	0.22789	-2.13359	0.319756	9.90704	2.25772	9.58937	20.1318	0	6.77316	0	0	14	33	0	18	0	0	middle
127	gma-miR4995_L-2R-1	GCAGTGGCTTGGTTAAGG	down	0.0538803	-4.2141	0.32018	118.07	6.36166	15.4115	51.5495	287.25	13.17	5.91497	0	22.5	84.5	59	35	2.5	0	middle
128	PC-3p-67208_37	TAGGGGTAGGAAATGAGGTCT	down	0.136378	-2.87431	0.321796	4.59856	0.627144	3.42477	10.3709	0	1.88143	0	0	5	17	0	5	0	0	middle
129	aof-miR408_R+1	TGCACTGCCTCTTCCCTGGCTT	up	1.54148	0.62432	0.327055	66.8737	103.085	29.7955	49.1093	121.716	117.213	80.4435	111.597	43.5	80.5	25	311.5	34	116.5	middle
130	PC-3p-28471_100	TAGTACCATGAGAATGACCCTGCC	down	0.380838	-1.39275	0.328355	37.337	14.2193	4.79468	43.9238	63.2924	34.9946	0	7.66333	7	72	13	93	0	8	middle
131	osa-MIR444d-p3	TGCCTCAAGCTTGCTGCCTCC	up	3.54866	1.82728	0.328602	2.99491	10.6279	6.84955	2.13519	0	11.2886	0	20.5952	10	3.5	0	30	0	21.5	middle
132	PC-3p-33001_85	TCAAGATCCGACGGTTCAAAT	down	0.13931	-2.84363	0.32988	14.4057	2.00686	10.2743	32.9429	0	6.02058	0	0	15	54	0	16	0	0	middle
133	PC-3p-98603_22	TCTATCCCGGCATTTGGACCC	down	0.276527	-1.85451	0.329981	1.58755	0.439001	1.71239	3.05027	0	1.317	0	0	2.5	5	0	3.5	0	0	low
134	PC-5p-38112_73	GTTCCTCCCCACCACTTCAGT	up	inf	inf	0.330833	0	33.6154	0	0	0	9.21902	86.3585	5.26854	0	0	0	24.5	36.5	5.5	middle
135	aof-miR167c	TGAAGCTGCCAGCATGATCTG	down	0.428151	-1.22381	0.331241	419.725	179.706	305.147	788.494	165.534	191.154	157.338	190.625	445.5	1292.5	34	508	66.5	199	high
136	bdi-miR5059_L-2_1ss3GT	TCCTGGGCAGCACCACCA	down	-inf	-inf	0.331576	9.53787	0	0	4.27037	24.3432	0	0	0	0	7	5	0	0	0	middle
137	osa-miR156a_L+1	CTGACAGAAGAGAGTGAGCAC	down	0.246196	-2.02212	0.3343	128.685	31.6817	85.9618	278.184	21.9089	56.2548	20.1109	18.6794	125.5	456	4.5	149.5	8.5	19.5	middle
138	ath-miR828_2ss11AG17AG	TCTTGCTTAAGTGAGTGTTCCA	up	1.53542	0.618633	0.33485	199.474	306.276	317.476	35.0781	245.867	261.707	354.898	302.222	463.5	57.5	50.5	695.5	150	315.5	middle
139	gma-miR319a_R+1	TTGGACTGAAGGGAGCTCCCA	down	0.0463915	-4.43	0.336491	4.50617	0.209048	1.14159	1.01676	11.3602	0.627144	0	0	1.66667	1.66667	2.33333	1.66667	0	0	middle
140	aly-miR319a-3p_1ss21TA	TTGGACTGAAGGGAGCTCCCA	down	0.0463915	-4.43	0.336491	4.50617	0.209048	1.14159	1.01676	11.3602	0.627144	0	0	1.66667	1.66667	2.33333	1.66667	0	0	middle
141	PC-3p-55402_47	TTTTCTATTATTGGGCTGGTC	down	0.329268	-1.60266	0.336496	1.71419	0.56443	2.39734	2.74524	0	1.69329	0	0	3.5	4.5	0	4.5	0	0	low
142	PC-5p-49001_54	ACTTTCACACTACTAGACTCA	down	0.183147	-2.44893	0.33755	12.6698	2.32043	5.13716	3.66032	29.2119	6.9613	0	0	7.5	6	6	18.5	0	0	middle
143	ptc-miR6478_R-1	CCGACCTTAGCTCAGTTGGT	down	0.170187	-2.55481	0.337656	315.758	53.7378	31.5079	190.337	725.428	22.0128	132.495	6.70541	46	312	149	58.5	56	7	high
144	osa-miR160a-3p_2ss7AG21GA	GCGTGCGAGGAGCCAAGCATA	up	3.01151	1.59049	0.340209	3.45335	10.3998	5.47964	4.88043	0	12.0412	0	19.1583	8	8	0	32	0	20	middle
145	osa-miR5072_L-4_1ss13GA	TCCCCAGCAGAGTCGCCA	down	0.29915	-1.74106	0.342349	48.9979	14.6577	21.5761	20.7418	104.676	9.40716	13.0129	21.5531	31.5	34	21.5	25	5.5	22.5	middle
146	PC-3p-58462_44	TTTGCCCTTGGCACAATTTCA	up	1.98843	0.991629	0.342611	2.08164	4.13919	4.10973	2.13519	0	2.44586	7.09796	2.87375	6	3.5	0	6.5	3	3	low
147	osa-miR393b-3p_R+1_2ss4G-8AT	TCATGCTATCCCTTTGGAATT	down	0.304742	-1.71434	0.343073	202.231	61.6284	159.594	417.886	29.2119	90.685	52.0517	42.1483	233	685	6	241	22	44	middle
148	aof-MIR166c-p3	AAGGGGAATGTTGTCTGGCTC	down	0.264674	-1.91771	0.344132	356.725	94.4157	333.23	736.944	0	233.862	15.3789	34.006	486.5	1208	0	621.5	6.5	35.5	high
149	aof-MIR166c-p5	AAGGGGAATGTTGTCTGGCTC	down	0.264674	-1.91771	0.344132	356.725	94.4157	333.23	736.944	0	233.862	15.3789	34.006	486.5	1208	0	621.5	6.5	35.5	high
150	PC-5p-129090_15	GAAGGTCAAGGAAGTTGGTG	down	0.0436287	-4.51858	0.345559	17.2495	0.752573	0	7.93069	43.8178	2.25772	0	0	0	13	9	6	0	0	middle
151	hbr-MIR6173-p3_1ss19AG	CGTATCGACCCGTGCAGTG	down	0.183631	-2.44512	0.346097	8.87961	1.63057	6.50707	20.1318	0	4.89172	0	0	9.5	33	0	13	0	0	middle
152	PC-5p-1572_1829	TAGGGTCTGGAACATGGTATCGGA	up	1.74648	0.804449	0.347238	93.3155	162.973	57.5362	115.3	107.11	275.442	89.9075	123.571	84	189	22	732	38	129	middle
153	PC-5p-24200_119	CAACGTGGCTCGATTTGAACCA	up	4.03041	2.01093	0.350118	1.62681	6.5567	0	4.88043	0	13.9226	0	5.7475	0	8	0	37	0	6	middle
154	aof-miR171b_L-1R+2_1ss9CG	TGAGCCGGGCCAATATCACTCC	up	inf	inf	0.3518	0	2.67956	0	0	0	0.940716	7.09796	0	0	0	0	2.5	3	0	high
155	PC-3p-56058_46	TTGGTTATCTACTGTTGGAGG	down	0.211585	-2.24069	0.352185	3.55684	0.752573	2.73982	7.93069	0	2.25772	0	0	4	13	0	6	0	0	low
156	PC-5p-46136_58	TTGAGCCTTCGGATCTTGATC	down	0.289558	-1.78808	0.353268	4.11515	1.19157	4.10973	8.23572	0	3.57472	0	0	6	13.5	0	9.5	0	0	low
157	aof-miR393a_L+1R-5	TTCCAAAGGGATCGCATT	down	0.238998	-2.06493	0.354811	136.999	32.7426	55.4813	43.9238	311.593	28.0333	56.7837	13.4108	81	72	64	74.5	24	14	middle
158	gma-MIR4995-p3	TCATAGGCAGTGGCTTGGT	down	0.195905	-2.35178	0.3566	4.80191	0.940716	3.42477	10.981	0	2.82215	0	0	5	18	0	7.5	0	0	middle
159	gma-MIR5368-p5_1ss16CT	AATTCTAACCTTGTGTCAGGA	down	0.320269	-1.64264	0.357068	63.4801	20.3307	18.4938	135.432	36.5148	29.7266	28.3918	2.87375	27	222	7.5	79	12	3	middle
160	gma-MIR5368-p3_1ss16CT	AATTCTAACCTTGTGTCAGGA	down	0.320269	-1.64264	0.357068	63.4801	20.3307	18.4938	135.432	36.5148	29.7266	28.3918	2.87375	27	222	7.5	79	12	3	middle
161	peu-MIR2916-p5_1ss6AG	ATACCGTCCTAGTCTCAACCATA	down	0.25697	-1.96033	0.358255	2705.16	695.144	619.199	1425.08	6071.2	733.759	428.244	923.431	904	2336	1247	1950	181	964	high
162	osa-miR166d-5p_R+1_1ss19AT	GGAATGTTGTCTGGCTCGTGGT	down	0.280469	-1.83409	0.358354	128.961	36.1695	118.155	268.728	0	95.5768	0	12.9319	172.5	440.5	0	254	0	13.5	middle
163	gma-MIR6300-p5_1ss15AG	TGTAGTATAGTGGTGAGTATT	down	0.0556576	-4.16728	0.359072	81.5441	4.53855	10.2743	22.572	211.786	4.51544	0	9.1002	15	37	43.5	12	0	9.5	middle
164	osa-miR5072_L-4	TCCCCAGCGGAGTCGCCA	down	0.286003	-1.8059	0.360158	155.122	44.3653	56.8512	65.2757	343.24	30.6674	44.9537	57.475	83	107	70.5	81.5	19	60	middle
165	PC-3p-767_3820	GTCCCGGCAACGGAACCA	down	0.250628	-1.99638	0.365746	662.627	166.073	128.429	350.171	1509.28	122.858	110.018	265.343	187.5	574	310	326.5	46.5	277	high
166	PC-3p-64632_39	TTCTGAAAAAAGCGAGGGGATT	down	0.26568	-1.91224	0.367463	2.83262	0.752573	2.39734	6.10053	0	2.25772	0	0	3.5	10	0	6	0	0	low
167	PC-3p-19032_154	TAGAAGTGTGCCACCCAAGAT	down	0.0560875	-4.15618	0.368107	29.072	1.63057	10.9593	76.2567	0	4.89172	0	0	16	125	0	13	0	0	middle
168	PC-3p-35616_78	GTTGAGAACTGCGAACTTAGT	down	0.367318	-1.4449	0.368292	12.852	4.72078	15.069	23.4871	0	11.2886	0	2.87375	22	38.5	0	30	0	3	middle
169	osa-MIR2118e-p3_2ss12TA18CT	AAAAGAGAGTCAAAGAGT	down	0.0671855	-3.89571	0.369364	4.66726	0.313572	0	1.83016	12.1716	0.940716	0	0	0	3	2.5	2.5	0	0	middle
170	zma-miR156i-3p	GCTCACTGCTCTATCTGTCATC	down	0.329199	-1.60297	0.370229	2.85759	0.940716	3.0823	5.49048	0	2.82215	0	0	4.5	9	0	7.5	0	0	middle
171	sbi-MIR156f-p3	TTGCGTGCTCACTTCTCTTTCTG	down	0.296273	-1.755	0.370248	78.0916	23.1364	69.8654	164.409	0	54.5615	0	14.8477	102	269.5	0	145	0	15.5	middle
172	PC-3p-25301_114	AATGCATTGATGTGTGTGGGGTCC	up	4.00169	2.00061	0.370507	1.82655	7.30927	5.47964	0	0	16.1803	0	5.7475	8	0	0	43	0	6	middle
173	PC-5p-25204_114	CATCATTTTCTACCCTAAACT	down	0.133529	-2.90477	0.371955	28.1801	3.76287	14.384	70.1561	0	11.2886	0	0	21	115	0	30	0	0	middle
174	PC-5p-159895_11	TCAATGACGGATTAAGGCAAA	up	5.24379	2.39061	0.372857	0.570796	2.99313	1.71239	0	0	1.88143	7.09796	0	2.5	0	0	5	3	0	low
175	gma-MIR6300-p5_1ss18AG_2	CGTTGTAGTATAGTGGTGAGTATT	down	0.0898885	-3.47572	0.373033	129.394	11.631	14.7265	37.5183	335.937	24.8349	0	10.0581	21.5	61.5	69	66	0	10.5	middle
176	gma-MIR6300-p5_1ss18AG_1	CGTTGTAGTATAGTGGTGAGTAT	down	0.0898885	-3.47572	0.373033	129.394	11.631	14.7265	37.5183	335.937	24.8349	0	10.0581	21.5	61.5	69	66	0	10.5	middle
177	PC-3p-1469_1942	TTTGGGGTAAGAAATGATGTA	down	0.168705	-2.56743	0.373848	390.261	65.8388	223.98	946.803	0	159.545	28.3918	9.57916	327	1552	0	424	12	10	high
178	osa-miR528-5p_1ss21GA	TGGAAGGGGCATGCAGAGGAA	up	3.63893	1.86352	0.374798	2.00674	7.30238	2.05486	3.96535	0	15.9922	5.91497	0	3	6.5	0	42.5	2.5	0	middle
179	PC-3p-31659_90	CCCAACTACCAGAACTTCTCA	down	0.129895	-2.94458	0.378587	8.69055	1.12886	4.10973	21.9619	0	3.38658	0	0	6	36	0	9	0	0	middle
180	PC-5p-19884_147	CGATTGTGGAGGGGCAGATGT	down	0.113469	-3.13963	0.379879	11.0541	1.25429	4.79468	28.3675	0	3.76287	0	0	7	46.5	0	10	0	0	middle
181	PC-3p-115610_18	TCTTTTAGTGACAAGTGGACC	down	0.367878	-1.4427	0.380611	2.38666	0.878002	4.10973	3.05027	0	2.63401	0	0	6	5	0	7	0	0	low
182	vvi-MIR169x-p5_2ss14GC20GA	TTATCCACAAAGCCATTCCA	down	0.298412	-1.74462	0.380939	2.31176	0.689859	2.05486	4.88043	0	2.06958	0	0	3	8	0	5.5	0	0	low
183	gma-MIR6300-p3_1ss18AG	CGTTGTAGTATAGTGGTGAGT	down	0.382743	-1.38555	0.381345	57.0346	21.8296	16.4389	35.3831	119.282	32.9251	20.1109	12.4529	24	58	24.5	87.5	8.5	13	middle
184	PC-3p-97429_23	TAGTTCTTTCTACCACACTAGTTC	down	0.251684	-1.99031	0.381737	3.23933	0.815287	2.39734	7.32064	0	2.44586	0	0	3.5	12	0	6.5	0	0	low
185	PC-3p-10906_268	TCTCTAGCCATAAGCTTATGT	up	2.50203	1.3231	0.382759	91.2093	228.208	44.1796	5.49048	223.958	45.1544	191.645	447.826	64.5	9	46	120	81	467.5	middle
186	PC-3p-75346_32	TGTTAAGGAGAGGCCGCAGCT	up	2.68047	1.42249	0.388964	1.01676	2.72539	0	3.05027	0	3.38658	0	4.78958	0	5	0	9	0	5	low
187	aof-miR156c	TGACAGAAGAGAGAGAGCAC	down	0.111606	-3.16351	0.390199	67.2287	7.50315	25.6858	176	0	15.804	0	6.70541	37.5	288.5	0	42	0	7	middle
188	osa-miR5077_L-1_1ss5GA	TTCACGTCGGGTTCACCA	down	0.105186	-3.24898	0.390262	1168.07	122.865	175.006	240.056	3089.16	117.966	126.58	124.05	255.5	393.5	634.5	313.5	53.5	129.5	high
189	gma-MIR9726-p5_2ss3AT19TC	GTTTAGGCATTATTTTTTCC	down	0.405235	-1.30317	0.391001	65.3279	26.4731	23.9734	35.6881	136.322	22.0128	44.9537	12.4529	35	58.5	28	58.5	19	13	middle
190	gma-MIR9726-p3_2ss3AT19TC	GTTTAGGCATTATTTTTTCC	down	0.405235	-1.30317	0.391001	65.3279	26.4731	23.9734	35.6881	136.322	22.0128	44.9537	12.4529	35	58.5	28	58.5	19	13	middle
191	ptc-miR6478_R-3	CCGACCTTAGCTCAGTTG	down	-inf	-inf	0.391913	27.3896	0	0	4.27037	77.8983	0	0	0	0	7	16	0	0	0	middle
192	gma-miR6300_L-1R+4	TCGTTGTAGTATAGTGGTGAG	down	0.048587	-4.36329	0.391957	113.921	5.53509	10.9593	16.7765	314.028	7.33759	5.91497	3.35271	16	27.5	64.5	19.5	2.5	3.5	middle
193	gma-miR6300_L-1R+5	TCGTTGTAGTATAGTGGTGAGT	down	0.0519337	-4.26719	0.392782	243.099	12.6251	20.2062	39.6535	669.439	12.6056	9.46395	15.8056	29.5	65	137.5	33.5	4	16.5	high
194	aof-miR167b	TGAAGCTGCCAGCATGATCTGA	down	0.4891	-1.0318	0.393316	6690.4	3272.28	6069.38	12439	1562.84	4708.85	3372.71	1735.26	8861	20390	321	12514	1425.5	1811.5	high
195	gma-miR6300_R+6	GTCGTTGTAGTATAGTGGTGAGTA	down	0.200438	-2.31877	0.395774	155.642	31.1965	24.6584	55.2098	387.057	34.9946	26.0259	32.5691	36	90.5	79.5	93	11	34	middle
196	PC-3p-25651_112	TTGAGAATAACGATCTAGGTT	down	0.234769	-2.09068	0.397706	19.7678	4.64087	12.3292	46.9741	0	13.9226	0	0	18	77	0	37	0	0	middle
197	osa-miR167h-3p_2ss3GA12TC	AGATCATGCTGCAGTTTCATC	down	0.482728	-1.05072	0.399231	144.805	69.9012	102.058	281.235	51.1208	109.311	74.5286	25.8637	149	461	10.5	290.5	31.5	27	middle
198	PC-3p-114250_18	ATTGTCTTTTAGTGAGAAGTGAGC	down	0.109891	-3.18586	0.399825	4.56558	0.501715	0	1.52513	12.1716	1.50515	0	0	0	2.5	2.5	4	0	0	middle
199	gma-MIR5368-p3_1ss12CT	CTAACCTTGTGTCAGGACCT	down	0.446504	-1.16325	0.400036	76.9631	34.3644	31.5079	155.564	43.8178	54.5615	46.1367	2.39479	46	255	9	145	19.5	2.5	middle
200	osa-MIR5079a-p3_2ss4GT17TC	AAATGGTTCTCAAAAACTCG	down	0.0821372	-3.60582	0.400284	27.6966	2.27492	0	7.62567	75.464	3.95101	0	2.87375	0	12.5	15.5	10.5	0	3	middle
201	gma-MIR6300-p5_1ss10AG	TATAGTGGTGAGTATTCCCGCC	down	0.08652	-3.53082	0.40083	24.119	2.08678	2.05486	4.5754	65.7267	3.38658	0	2.87375	3	7.5	13.5	9	0	3	middle
202	gma-MIR6300-p3_1ss10AG	TATAGTGGTGAGTATTCCCGCC	down	0.08652	-3.53082	0.40083	24.119	2.08678	2.05486	4.5754	65.7267	3.38658	0	2.87375	3	7.5	13.5	9	0	3	middle
203	ath-miR8175_L-2	TCCCCGGCAACGGCGCCA	down	0.139299	-2.84375	0.401136	1267.49	176.56	196.582	275.744	3330.15	183.628	137.227	208.826	287	452	684	488	58	218	high
204	ptc-miR6478_R+2_1ss21GA	CCGACCTTAGCTCAGTTGGTAGA	down	0.573273	-0.802705	0.403673	32.0666	18.3829	10.6168	32.0278	53.5551	17.6855	30.7578	6.70541	15.5	52.5	11	47	13	7	middle
205	aof-miR156a	TGACAGAAGAGAGTGAGCAC	down	0.421051	-1.24793	0.404083	2116.34	891.087	1806.91	4269.46	272.644	1419.16	476.746	777.349	2638	6998.5	56	3771.5	201.5	811.5	high
206	cpa-miR156a	TGACAGAAGAGAGTGAGCAC	down	0.421051	-1.24793	0.404083	2116.34	891.087	1806.91	4269.46	272.644	1419.16	476.746	777.349	2638	6998.5	56	3771.5	201.5	811.5	high
207	tae-miR9773_R-4_1ss2TC	TCTGTTTTTATGTTATTTTG	down	-inf	-inf	0.406449	18.3601	0	0	1.52513	53.5551	0	0	0	0	2.5	11	0	0	0	middle
208	osa-miR169a	CAGCCAAGGATGACTTGCCGA	down	0.361529	-1.46782	0.406741	4.16328	1.50515	8.21946	4.27037	0	4.51544	0	0	12	7	0	12	0	0	low
209	PC-3p-24138_120	TGCTTTTTCTTAATTCCATGC	down	0.271453	-1.88123	0.407288	25.1825	6.83587	17.1239	0	58.4237	20.5076	0	0	25	0	12	54.5	0	0	middle
210	bdi-MIR7765-p3_2ss13GA17TG	TTGTGAGGTGGAACATGT	down	0.0795818	-3.65142	0.408921	21.9235	1.74471	3.0823	1.83016	60.8581	1.88143	0	3.35271	4.5	3	12.5	5	0	3.5	middle
211	bdi-MIR7765-p5_2ss13GA17TG	TTGTGAGGTGGAACATGT	down	0.0795818	-3.65142	0.408921	21.9235	1.74471	3.0823	1.83016	60.8581	1.88143	0	3.35271	4.5	3	12.5	5	0	3.5	middle
212	gma-miR6300_L-1R+8	TCGTTGTAGTATAGTGGTGAGTATT	down	0.0283172	-5.14218	0.410074	667.613	18.9049	20.5486	59.1752	1923.12	30.2911	13.0129	13.4108	30	97	395	80.5	5.5	14	high
213	gma-MIR10423-p3_1ss3AC	CTCTCAATGAAAGCACCA	down	0.17835	-2.48722	0.410405	193.492	34.5093	36.3026	42.7037	501.47	26.3401	33.1238	44.0641	53	70	103	70	14	46	middle
214	gma-MIR6300-p3_1ss13AG_2	TAGTATAGTGGTGAGTATT	down	0.0115632	-6.43431	0.410921	65.0833	0.752573	1.71239	3.66032	189.877	2.25772	0	0	2.5	6	39	6	0	0	middle
215	gma-MIR6300-p3_1ss13AG_1	TAGTATAGTGGTGAGTAT	down	0.0115632	-6.43431	0.410921	65.0833	0.752573	1.71239	3.66032	189.877	2.25772	0	0	2.5	6	39	6	0	0	middle
216	PC-5p-5208_568	TTCACAACTGCGGTCTTAGTT	down	0.197087	-2.34309	0.413921	77.6441	15.3027	35.2752	197.657	0	35.3709	0	10.5371	51.5	324	0	94	0	11	middle
217	lus-MIR172d-p5_2ss9CA17AT	TCAAGATTAACATGTATAGCT	down	0.539678	-0.88983	0.415029	23.6746	12.7767	8.90441	18.3016	43.8178	11.2886	21.2939	5.7475	13	30	9	30	9	6	middle
218	PC-5p-39084_71	TGGAGTTGTCTTTTAGTGGTGA	up	2.53981	1.34472	0.415138	2.30996	5.86684	4.79468	2.13519	0	11.853	0	5.7475	7	3.5	0	31.5	0	6	middle
219	osa-MIR159c-p5_2ss13GA19TC	TTTGCATGACCCAGGAGACGA	up	1.67466	0.743865	0.415367	10.4831	17.5556	22.6035	8.84577	0	24.8349	15.3789	12.4529	33	14.5	0	66	6.5	13	middle
220	aof-miR172	AGAATCTTGATGATGCTGCAT	up	1.44687	0.53294	0.415435	389.787	563.973	697.626	286.725	185.009	680.702	657.744	353.471	1018.5	470	38	1809	278	369	high
221	PC-5p-31534_90	TGGGTGCAGTTGGATCTGCAGT	down	0.0135258	-6.20814	0.415926	27.8198	0.376287	1.71239	81.7471	0	1.12886	0	0	2.5	134	0	3	0	0	middle
222	PC-5p-11294_259	TGGGATTGTCTTTTAGTGGTG	down	0.307278	-1.70238	0.416092	18.3693	5.64447	13.0141	42.0937	0	11.6649	0	5.26854	19	69	0	31	0	5.5	middle
223	ptc-MIR6438b-p3_2ss15TA19CT	ATTTCACTATTCTGAGCAT	down	0.196762	-2.34548	0.417249	14.1641	2.78694	4.45221	1.52513	36.5148	2.44586	5.91497	0	6.5	2.5	7.5	6.5	2.5	0	middle
224	ptc-MIR6438b-p5_2ss15TA19CT	ATTTCACTATTCTGAGCAT	down	0.196762	-2.34548	0.417249	14.1641	2.78694	4.45221	1.52513	36.5148	2.44586	5.91497	0	6.5	2.5	7.5	6.5	2.5	0	middle
225	gma-MIR5368-p5_1ss13CT	TCTAACCTTGTGTCAGGA	down	0.212515	-2.23436	0.417304	58.6729	12.4689	14.384	149.463	12.1716	34.0539	0	3.35271	21	245	2.5	90.5	0	3.5	middle
226	gma-miR6300_L-1R+1	TCGTTGTAGTATAGTGGT	down	0.072204	-3.79178	0.417642	61.0407	4.40738	4.79468	5.49048	172.837	5.07987	0	8.14228	7	9	35.5	13.5	0	8.5	middle
227	gma-miR6300_L-1R+7	TCGTTGTAGTATAGTGGTGAGTAT	down	0.0060269	-7.37437	0.418208	716.72	4.3196	8.21946	16.7765	2125.16	1.12886	11.8299	0	12	27.5	436.5	3	5	0	high
228	gma-miR6300_L-1R+6	TCGTTGTAGTATAGTGGTGAGTA	down	0.00262962	-8.57093	0.418409	190.794	0.501715	0	5.18545	567.197	1.50515	0	0	0	8.5	116.5	4	0	0	high
229	PC-3p-38309_72	CTGACAATCCATAAGAAATAAAGC	down	0.323742	-1.62708	0.418702	7.74869	2.50858	6.16459	17.0815	0	7.52573	0	0	9	28	0	20	0	0	middle
230	PC-5p-1494_1921	TGGGTGCAGTTGGATCTGCAG	down	0.024144	-5.37219	0.419237	181.826	4.39001	11.9867	533.492	0	13.17	0	0	17.5	874.5	0	35	0	0	high
231	ptc-miR6478_2ss20TC21GA	CCGACCTTAGCTCAGTTGGCA	down	0.154233	-2.69682	0.420033	12.7836	1.97166	0	4.27037	34.0805	0	5.91497	0	0	7	7	0	2.5	0	middle
232	PC-5p-80303_29	TCCTCTGAGAAACAACAATGT	up	2.8027	1.48682	0.42011	2.03351	5.69931	0	6.10053	0	5.26801	11.8299	0	0	10	0	14	5	0	middle
233	mes-miR171e_L-1_1ss9CG	TGAGCCGGGCCAATATCACT	down	0.268043	-1.89946	0.420631	11.2306	3.01029	6.84955	26.8423	0	9.03088	0	0	10	44	0	24	0	0	middle
234	osa-MIR156f-p5	CAGAAGAGAGTGAGCACACAG	down	-inf	-inf	0.42265	0.813404	0	0	2.44021	0	0	0	0	0	4	0	0	0	0	low
235	sbi-miR156a_1ss20CT	TGACAGAAGAGAGTGAGCAT	down	-inf	-inf	0.42265	1.42346	0	0	4.27037	0	0	0	0	0	7	0	0	0	0	low
236	osa-MIR156g-p5	CAGAAGAGAGTGAGCACACAG	down	-inf	-inf	0.42265	0.813404	0	0	2.44021	0	0	0	0	0	4	0	0	0	0	low
237	stu-miR156f-5p_L-1R+1	TGACAGAAGAGAGTGAGCAT	down	-inf	-inf	0.42265	1.42346	0	0	4.27037	0	0	0	0	0	7	0	0	0	0	low
238	osa-miR156a_L+1R-2	CTGACAGAAGAGAGTGAGC	down	-inf	-inf	0.42265	1.22011	0	0	3.66032	0	0	0	0	0	6	0	0	0	0	low
239	zma-MIR159e-p5_2ss11CG17CT	GCGGCGACGGGGGCGGTC	up	inf	inf	0.42265	0	0.313572	0	0	0	0.940716	0	0	0	0	0	2.5	0	0	middle
240	ptc-miR160h	TGCCTGGCTCCCTGCATGCCA	up	inf	inf	0.42265	0	0.627144	0	0	0	1.88143	0	0	0	0	0	5	0	0	low
241	mtr-MIR164a-p3	CACGTGCTCCCCTTCTCCAAC	up	inf	inf	0.42265	0	2.87375	0	0	0	0	0	8.62124	0	0	0	0	0	9	low
242	aly-miR164a-3p_1ss6AG	CACGTGCTCCCCTTCTCCAAC	up	inf	inf	0.42265	0	2.87375	0	0	0	0	0	8.62124	0	0	0	0	0	9	low
243	osa-miR164d_1ss20CA	TGGAGAAGCAGGGCACGTGAT	up	inf	inf	0.42265	0	1.25429	0	0	0	3.76287	0	0	0	0	0	10	0	0	low
244	osa-miR169e_2ss13AG21GA	TAGCCAAGGATGGCTTGCCGA	down	-inf	-inf	0.42265	0.684955	0	2.05486	0	0	0	0	0	3	0	0	0	0	0	low
245	mtr-miR169d-5p_L+1R-1_1ss7AG	GAAGCCGAGGATGACTTGCCG	up	inf	inf	0.42265	0	0.376287	0	0	0	1.12886	0	0	0	0	0	3	0	0	low
246	osa-MIR171g-p3_1	TGAGCCGAGCCAATATCACTT	up	inf	inf	0.42265	0	0.313572	0	0	0	0.940716	0	0	0	0	0	2.5	0	0	middle
247	osa-MIR171g-p3_2	TGAGCCGAGCCAATATCACTTC	up	inf	inf	0.42265	0	0.313572	0	0	0	0.940716	0	0	0	0	0	2.5	0	0	middle
248	aof-miR172_1ss4AC	AGACTCTTGATGATGCTGCAT	up	inf	inf	0.42265	0	6.77316	0	0	0	20.3195	0	0	0	0	0	54	0	0	middle
249	aof-miR172_R+1	AGAATCTTGATGATGCTGCATA	up	inf	inf	0.42265	0	1.97166	0	0	0	0	5.91497	0	0	0	0	0	2.5	0	low
250	aof-miR172_L-1	GAATCTTGATGATGCTGCAT	up	inf	inf	0.42265	0	1.91583	0	0	0	0	0	5.7475	0	0	0	0	0	6	low
251	gma-miR390b-5p	AAGCTCAGGAGGGATAGCACC	up	inf	inf	0.42265	0	0.501715	0	0	0	1.50515	0	0	0	0	0	4	0	0	middle
252	aof-miR396b_1ss2TN	TNCCACAGCTTTCTTGAACTG	up	inf	inf	0.42265	0	0.627144	0	0	0	1.88143	0	0	0	0	0	5	0	0	middle
253	aof-miR396b_L-1R-1	TCCACAGCTTTCTTGAACT	up	inf	inf	0.42265	0	0.439001	0	0	0	1.317	0	0	0	0	0	3.5	0	0	middle
254	vvi-MIR398c-p5_2ss4TA20GT	TCCAACAGGAGTGACCTGATA	up	inf	inf	0.42265	0	0.627144	0	0	0	1.88143	0	0	0	0	0	5	0	0	low
255	osa-MIR398a-p3_1ss11AG	TTCTCAGGTCGCCCCTTTGGG	down	-inf	-inf	0.42265	3.45697	0	0	10.3709	0	0	0	0	0	17	0	0	0	0	middle
256	aof-MIR827-p3_1ss18TC	TGACCATCAACAAACACCTTC	down	-inf	-inf	0.42265	0.610053	0	0	1.83016	0	0	0	0	0	3	0	0	0	0	low
257	mes-miR828a_L+1_1ss18AG	CTCTTGCTCAAATGAGTGTTCCA	up	inf	inf	0.42265	0	0.627144	0	0	0	1.88143	0	0	0	0	0	5	0	0	low
258	ptc-MIR7840-p5_2ss10CA19GA	AGAGACAGAAACACAAAGAAA	down	-inf	-inf	0.42265	2.03351	0	0	6.10053	0	0	0	0	0	10	0	0	0	0	low
259	aof-miR12143_L-1R-1_1ss2CT	TGGGTGCAGTTGGATCTGC	down	-inf	-inf	0.42265	6.50723	0	0	19.5217	0	0	0	0	0	32	0	0	0	0	middle
260	aof-miR159_1ss7TG	TTTGGAGTGAAGGGAGCTCTA	up	inf	inf	0.42265	0	1.75618	0	0	0	0	0	5.26854	0	0	0	0	0	5.5	low
261	ath-miR159c_R-1_1ss5GT	TTTGTATTGAAGGGAGCTCC	up	inf	inf	0.42265	0	0.627144	0	0	0	1.88143	0	0	0	0	0	5	0	0	low
262	ath-miR159c_R-1_1ss12GT	TTTGGATTGAATGGAGCTCC	up	inf	inf	0.42265	0	0.501715	0	0	0	1.50515	0	0	0	0	0	4	0	0	low
263	aof-miR160b_L-2R+2	CCTGGTTCCCTGTATGCCACA	down	-inf	-inf	0.42265	1.82655	0	5.47964	0	0	0	0	0	8	0	0	0	0	0	low
264	osa-miR166b-5p_R+1_2ss11CT19GA	GGAATGTTGTTTGGCTCGAGGT	up	inf	inf	0.42265	0	0.313572	0	0	0	0.940716	0	0	0	0	0	2.5	0	0	middle
265	ssp-MIR169-p3_2ss13GC17AC	CCCCGTCCGGCCCGGACC	up	inf	inf	0.42265	0	1.43687	0	0	0	0	0	4.31062	0	0	0	0	0	4.5	low
266	osa-miR171b_R+3	TGATTGAGCCGTGCCAATATCCCA	up	inf	inf	0.42265	0	1.12886	0	0	0	3.38658	0	0	0	0	0	9	0	0	low
267	gma-MIR395i-p3_1ss15TA	TTTGGGGGAACTCTAGGGCTC	up	inf	inf	0.42265	0	3.38658	0	0	0	10.1597	0	0	0	0	0	27	0	0	middle
268	gma-MIR395i-p3_2ss14TA20CT	TTGGGGGAACTCTAGGGCTT	up	inf	inf	0.42265	0	1.63057	0	0	0	4.89172	0	0	0	0	0	13	0	0	low
269	gma-MIR395i-p5_2ss14TA20CT	TTGGGGGAACTCTAGGGCTT	up	inf	inf	0.42265	0	1.63057	0	0	0	4.89172	0	0	0	0	0	13	0	0	low
270	lja-miR477-5p_R-1_1ss1AG	GCTCTCCCTCAAGGGCTTCTG	up	inf	inf	0.42265	0	0.376287	0	0	0	1.12886	0	0	0	0	0	3	0	0	middle
271	osa-MIR2118e-p3_1ss13TA	GAAAAGAGAGTCAAAGAG	down	-inf	-inf	0.42265	0.610053	0	0	1.83016	0	0	0	0	0	3	0	0	0	0	low
272	gma-MIR4995-p3_1ss20GC	AGTGGCTTGGTTAAGGGAACCCA	down	-inf	-inf	0.42265	2.03351	0	0	6.10053	0	0	0	0	0	10	0	0	0	0	low
273	osa-miR5083_L-2	ACTACAATTATCTGATCA	down	-inf	-inf	0.42265	14.6059	0	0	0	43.8178	0	0	0	0	0	9	0	0	0	middle
274	gma-MIR5368-p5_1ss10AG	CTTTCCTGCGCAGCTTAGG	down	-inf	-inf	0.42265	0.508378	0	0	1.52513	0	0	0	0	0	2.5	0	0	0	0	low
275	gma-MIR5368-p5_1ss1AT	TGAGATACCACTCTGGACGAGCTAG	down	-inf	-inf	0.42265	12.1716	0	0	0	36.5148	0	0	0	0	0	7.5	0	0	0	middle
276	hbr-MIR6173-p3_2ss23AG24TC	TGTGCGTATCGACCCGTGCAGTGC	up	inf	inf	0.42265	0	0.376287	0	0	0	1.12886	0	0	0	0	0	3	0	0	low
277	gma-miR6300_1ss2TN	GNCGTTGTAGTATAGTGG	up	inf	inf	0.42265	0	0.313572	0	0	0	0.940716	0	0	0	0	0	2.5	0	0	low
278	gma-MIR6300-p5_1ss8AG_2	TAGTGGTGAGTATTCCCGCC	up	inf	inf	0.42265	0	0.798263	0	0	0	0	0	2.39479	0	0	0	0	0	2.5	middle
279	gma-miR6300_1ss3CT	GTTGTTGTAGTATAGTGG	up	inf	inf	0.42265	0	0.313572	0	0	0	0.940716	0	0	0	0	0	2.5	0	0	middle
280	gma-MIR6300-p5_1ss8AG_1	TAGTGGTGAGTATTCCCG	up	inf	inf	0.42265	0	0.798263	0	0	0	0	0	2.39479	0	0	0	0	0	2.5	middle
281	gma-miR6300_1ss17GT	GTCGTTGTAGTATAGTTG	up	inf	inf	0.42265	0	1.11757	0	0	0	0	0	3.35271	0	0	0	0	0	3.5	middle
282	gma-miR6300_R+1_1ss15GT	GTCGTTGTAGTATATTGGT	down	-inf	-inf	0.42265	4.86865	0	0	0	14.6059	0	0	0	0	0	3	0	0	0	middle
283	gma-miR6300_L+1	CGTCGTTGTAGTATAGTGG	up	inf	inf	0.42265	0	0.56443	0	0	0	1.69329	0	0	0	0	0	4.5	0	0	low
284	gma-miR6300_1ss15GT	GTCGTTGTAGTATATTGG	down	-inf	-inf	0.42265	4.86865	0	0	0	14.6059	0	0	0	0	0	3	0	0	0	middle
285	gma-MIR6300-p3_1ss8AG	TAGTGGTGAGTATTCCCGCC	up	inf	inf	0.42265	0	0.798263	0	0	0	0	0	2.39479	0	0	0	0	0	2.5	middle
286	ptc-MIR6438b-p5_2ss13TA17CT	TTCACTATTCTGAGCATA	down	-inf	-inf	0.42265	4.0572	0	0	0	12.1716	0	0	0	0	0	2.5	0	0	0	middle
287	ptc-miR6478_R-2_1ss10GA	CCGACCTTAACTCAGTTGG	down	-inf	-inf	0.42265	0.508378	0	0	1.52513	0	0	0	0	0	2.5	0	0	0	0	middle
288	ptc-miR6478_R-1_1ss10GA	CCGACCTTAACTCAGTTGGT	down	-inf	-inf	0.42265	1.01676	0	0	3.05027	0	0	0	0	0	5	0	0	0	0	middle
289	bol-MIR9410-p3_2ss4TG17TA	TTTGCAGACGACTTAAAT	down	-inf	-inf	0.42265	1.11843	0	0	3.35529	0	0	0	0	0	5.5	0	0	0	0	middle
290	bol-MIR9410-p5_2ss4TG17TA_1	TTTGCAGACGACTTAAAT	down	-inf	-inf	0.42265	1.11843	0	0	3.35529	0	0	0	0	0	5.5	0	0	0	0	middle
291	bol-MIR9410-p5_2ss4TG17TA_2	TTTGCAGACGACTTAAATA	down	-inf	-inf	0.42265	1.11843	0	0	3.35529	0	0	0	0	0	5.5	0	0	0	0	middle
292	sly-MIR9477-p3_2ss10CG17GC	GGTGATATTGTAGGTTCG	down	-inf	-inf	0.42265	0.813404	0	0	2.44021	0	0	0	0	0	4	0	0	0	0	low
293	gma-MIR9733-p5_2ss3TC19GA	GTCAAGTGATGTTGGGACA	down	-inf	-inf	0.42265	0.570796	0	1.71239	0	0	0	0	0	2.5	0	0	0	0	0	middle
294	tae-miR9773_R-5_1ss2TC	TCTGTTTTTATGTTATTTT	down	-inf	-inf	0.42265	4.0572	0	0	0	12.1716	0	0	0	0	0	2.5	0	0	0	middle
295	aly-miR172a-5p_1ss2TA	GAGGCATCATCAAGATTCACA	up	inf	inf	0.42265	0	0.627144	0	0	0	1.88143	0	0	0	0	0	5	0	0	low
296	mdm-miR395a_L-1R+3	TGAAGTGTTTGGGGGAACTCCCA	up	inf	inf	0.42265	0	1.317	0	0	0	3.95101	0	0	0	0	0	10.5	0	0	low
297	aly-miR395c-3p_L+2_1ss19GA	CACTGAAGTGTTTGGGGGAACTT	up	inf	inf	0.42265	0	0.313572	0	0	0	0.940716	0	0	0	0	0	2.5	0	0	low
298	aly-miR397a-5p_1ss21GT	TCATTGAGTGCAGCGTTGATT	up	inf	inf	0.42265	0	0.376287	0	0	0	1.12886	0	0	0	0	0	3	0	0	low
299	ath-miR845a_R+1	CGGCTCTGATACCAATTGATGG	down	-inf	-inf	0.42265	1.22011	0	0	3.66032	0	0	0	0	0	6	0	0	0	0	middle
300	bdi-miR5054_1ss10TA	TCCCCACGGACGGCGCCA	down	-inf	-inf	0.42265	11.3602	0	0	0	34.0805	0	0	0	0	0	7	0	0	0	middle
301	PC-5p-369204_5	ACATCATGTGCCGTCTGTTGATTT	up	inf	inf	0.42265	0	0.627144	0	0	0	1.88143	0	0	0	0	0	5	0	0	low
302	PC-5p-287152_5	ACTCTCCCTCAAGGGCTTCCATGG	up	inf	inf	0.42265	0	0.627144	0	0	0	1.88143	0	0	0	0	0	5	0	0	low
303	PC-3p-78468_30	GAGGCCTTTGTTGGAGAGTAG	up	inf	inf	0.42265	0	0.313572	0	0	0	0.940716	0	0	0	0	0	2.5	0	0	low
304	PC-3p-169997_10	AATGAGATTGCGGCACCTAAGATT	up	inf	inf	0.42265	0	1.25429	0	0	0	3.76287	0	0	0	0	0	10	0	0	low
305	PC-3p-118888_17	TTTGGGATAGAATGTCATGTA	down	-inf	-inf	0.42265	1.72848	0	0	5.18545	0	0	0	0	0	8.5	0	0	0	0	low
306	PC-5p-244607_6	TGGAAGGGGCATGCAGAGGAGATTG	up	inf	inf	0.42265	0	0.752573	0	0	0	2.25772	0	0	0	0	0	6	0	0	low
307	PC-5p-178040_9	CTGTCTTAGGTGGCACATTCC	down	-inf	-inf	0.42265	1.42346	0	0	4.27037	0	0	0	0	0	7	0	0	0	0	low
308	PC-3p-163469_11	CAAAAAGCGAGTGTTGGTCTGC	down	-inf	-inf	0.42265	1.11843	0	0	3.35529	0	0	0	0	0	5.5	0	0	0	0	low
309	PC-3p-107935_20	TTTGTAGAGAGGTATACAACC	up	inf	inf	0.42265	0	0.501715	0	0	0	1.50515	0	0	0	0	0	4	0	0	low
310	PC-3p-161905_11	TTGAAACGAGGCTTAGGTGGT	down	-inf	-inf	0.42265	1.11843	0	0	3.35529	0	0	0	0	0	5.5	0	0	0	0	low
311	PC-5p-122217_16	TAGTTAAAACAAGATCGGTCT	down	-inf	-inf	0.42265	1.62681	0	0	4.88043	0	0	0	0	0	8	0	0	0	0	low
312	PC-3p-107172_20	CATTTTCCTCTTCAAAACCCA	down	-inf	-inf	0.42265	0.508378	0	0	1.52513	0	0	0	0	0	2.5	0	0	0	0	low
313	PC-3p-92031_24	TGTGCTAAACTCGGTCTTTTT	down	-inf	-inf	0.42265	2.44021	0	0	7.32064	0	0	0	0	0	12	0	0	0	0	low
314	PC-5p-146487_13	AGATCCACCTCAAATCTGACC	down	-inf	-inf	0.42265	1.32178	0	0	3.96535	0	0	0	0	0	6.5	0	0	0	0	low
315	PC-5p-110770_19	TCGCTGTTAGGAATAGTGACC	up	inf	inf	0.42265	0	0.376287	0	0	0	1.12886	0	0	0	0	0	3	0	0	low
316	PC-5p-218383_7	GAAGTGGGAAACTCATGGAATC	down	-inf	-inf	0.42265	1.42346	0	0	4.27037	0	0	0	0	0	7	0	0	0	0	low
317	PC-3p-242440_6	ATCTACATATTGGTGAATCCT	down	-inf	-inf	0.42265	1.01676	0	0	3.05027	0	0	0	0	0	5	0	0	0	0	low
318	PC-5p-162021_11	ACTAGTGTGGTAGAAAGAACTC	down	-inf	-inf	0.42265	2.23686	0	0	6.71059	0	0	0	0	0	11	0	0	0	0	low
319	PC-3p-183666_9	ATAGTTCTTTCTACCACACC	down	-inf	-inf	0.42265	1.83016	0	0	5.49048	0	0	0	0	0	9	0	0	0	0	low
320	PC-3p-205768_7	GGGTGCATGAGTGGAAACACA	up	inf	inf	0.42265	0	0.439001	0	0	0	1.317	0	0	0	0	0	3.5	0	0	low
321	PC-5p-26910_106	CTCGCAGGAGAGATGATGTCGCG	down	-inf	-inf	0.42265	0.711729	0	0	2.13519	0	0	0	0	0	3.5	0	0	0	0	middle
322	PC-3p-80101_29	CAATACCATGTTGCAGACCCTGCC	down	-inf	-inf	0.42265	8.11441	0	0	0	24.3432	0	0	0	0	0	5	0	0	0	middle
323	PC-5p-131179_15	TTAGCCATTGATTAATCTTCT	down	-inf	-inf	0.42265	0.610053	0	0	1.83016	0	0	0	0	0	3	0	0	0	0	low
324	PC-5p-120083_17	AATCTTAGTTGGCACAATCTCATT	up	inf	inf	0.42265	0	0.501715	0	0	0	1.50515	0	0	0	0	0	4	0	0	low
325	PC-3p-150458_12	CCACTAAAAGACAACCTCATG	down	-inf	-inf	0.42265	1.22011	0	0	3.66032	0	0	0	0	0	6	0	0	0	0	low
326	PC-5p-143100_13	AAATAACTCTGTTTTTCAAATACC	up	inf	inf	0.42265	0	0.376287	0	0	0	1.12886	0	0	0	0	0	3	0	0	low
327	PC-5p-89258_25	ATTTCGAGGTCGCTAATGAGAATT	down	-inf	-inf	0.42265	0.91508	0	0	2.74524	0	0	0	0	0	4.5	0	0	0	0	low
328	PC-3p-110197_19	AATGGGATTGTGACACATAAGGTT	up	inf	inf	0.42265	0	1.19157	0	0	0	3.57472	0	0	0	0	0	9.5	0	0	low
329	PC-5p-177037_10	ATAAACGCATTGGGGCTCACTTCT	up	inf	inf	0.42265	0	1.25429	0	0	0	3.76287	0	0	0	0	0	10	0	0	low
330	PC-5p-198732_8	CAAATAGGAAAAGAACTGATGT	up	inf	inf	0.42265	0	1.00343	0	0	0	3.01029	0	0	0	0	0	8	0	0	low
331	PC-5p-151025_12	CTGCGGCCTCTCTTTAACATG	down	-inf	-inf	0.42265	1.01676	0	0	3.05027	0	0	0	0	0	5	0	0	0	0	low
332	PC-3p-188503_8	AATGTCGGCACATAATGGAGGGCC	up	inf	inf	0.42265	0	1.00343	0	0	0	3.01029	0	0	0	0	0	8	0	0	low
333	PC-3p-8907_330	CATGTGCCCATCTTTTCCACC	up	inf	inf	0.42265	0	3.83166	0	0	0	0	0	11.495	0	0	0	0	0	12	middle
334	PC-5p-204759_7	AATAGCGACCTCGTATAACCAAAG	up	inf	inf	0.42265	0	0.878002	0	0	0	2.63401	0	0	0	0	0	7	0	0	low
335	PC-3p-93541_24	AATGAGATTGGGACACCTAAGATT	up	inf	inf	0.42265	0	0.752573	0	0	0	2.25772	0	0	0	0	0	6	0	0	low
336	PC-3p-108903_19	AATGAGATTGTGTCATCTAAGATT	up	inf	inf	0.42265	0	0.752573	0	0	0	2.25772	0	0	0	0	0	6	0	0	middle
337	PC-3p-128080_15	AAAGCATTGATGGATGGTTGGATC	up	inf	inf	0.42265	0	1.00343	0	0	0	3.01029	0	0	0	0	0	8	0	0	low
338	PC-5p-163259_11	TTACATGGAGTTTGTCTTTTAG	down	-inf	-inf	0.42265	2.23686	0	0	6.71059	0	0	0	0	0	11	0	0	0	0	low
339	PC-5p-156337_11	ATTATAAATGTATTGGGATCCACT	up	inf	inf	0.42265	0	0.627144	0	0	0	1.88143	0	0	0	0	0	5	0	0	low
340	PC-5p-368666_5	ATTATAAACGTATTGGGGCTCACT	up	inf	inf	0.42265	0	1.25429	0	0	0	3.76287	0	0	0	0	0	10	0	0	low
341	PC-5p-80863_29	AACTGATGTCGTTCTTCTGGAGAA	up	inf	inf	0.42265	0	1.00343	0	0	0	3.01029	0	0	0	0	0	8	0	0	low
342	PC-3p-146243_13	ATCGTTGTTCAGGATAGCGGCATC	down	-inf	-inf	0.42265	1.01676	0	0	3.05027	0	0	0	0	0	5	0	0	0	0	low
343	PC-5p-172612_10	TTGTCCAGCCCTCAGTTCACG	down	-inf	-inf	0.42265	1.01676	0	0	3.05027	0	0	0	0	0	5	0	0	0	0	low
344	PC-3p-159153_11	AAGGAGATTGCGCCACCTAAGGTT	up	inf	inf	0.42265	0	1.37972	0	0	0	4.13915	0	0	0	0	0	11	0	0	low
345	PC-3p-172079_10	AAAGTAGTTTGTCCATATGTAAGA	up	inf	inf	0.42265	0	2.75943	0	0	0	8.2783	0	0	0	0	0	22	0	0	low
346	PC-3p-159145_11	CTGGAAATCTCTCAACTCAATAGT	up	inf	inf	0.42265	0	0.627144	0	0	0	1.88143	0	0	0	0	0	5	0	0	low
347	PC-3p-193555_8	ATGGACAAAACACATTCAACTT	down	-inf	-inf	0.42265	1.22011	0	0	3.66032	0	0	0	0	0	6	0	0	0	0	low
348	PC-5p-259872_6	AAATGCATTGGACCCCACTTCTCA	down	-inf	-inf	0.42265	2.23686	0	0	6.71059	0	0	0	0	0	11	0	0	0	0	low
349	PC-3p-82176_28	CATGTATGTAGGGTGAGATATA	down	-inf	-inf	0.42265	1.01676	0	0	3.05027	0	0	0	0	0	5	0	0	0	0	low
350	PC-3p-75283_32	AAAATGATCAGATGGTACAACATG	up	inf	inf	0.42265	0	0.439001	0	0	0	1.317	0	0	0	0	0	3.5	0	0	low
351	PC-5p-107548_20	TTAGTTTCGACTCACGATTTGA	up	inf	inf	0.42265	0	1.37972	0	0	0	4.13915	0	0	0	0	0	11	0	0	low
352	PC-3p-60945_42	CTTTAAAAAATCGAGTTAGTT	down	-inf	-inf	0.42265	0.508378	0	0	1.52513	0	0	0	0	0	2.5	0	0	0	0	middle
353	PC-5p-135317_14	ATTTCTATGTGGAATTCAATTGTA	up	inf	inf	0.42265	0	0.752573	0	0	0	2.25772	0	0	0	0	0	6	0	0	low
354	PC-5p-171935_10	TCACAACTGCGGTCTTAGTTA	down	-inf	-inf	0.42265	1.01676	0	0	3.05027	0	0	0	0	0	5	0	0	0	0	low
355	PC-5p-167790_10	ACTTCACTTTCCGTCTGACGAATT	down	-inf	-inf	0.42265	1.01676	0	0	3.05027	0	0	0	0	0	5	0	0	0	0	low
356	PC-3p-49379_54	AGCGTTCGGACGGCACATTATGTG	up	inf	inf	0.42265	0	3.13572	0	0	0	9.40716	0	0	0	0	0	25	0	0	low
357	PC-3p-155359_12	ATGGACCAATCATGTGAGAGAGTT	down	-inf	-inf	0.42265	1.59823	0	4.79468	0	0	0	0	0	7	0	0	0	0	0	low
358	PC-3p-314715_5	AATGAGATTGTGCCATCTAAGATT	down	-inf	-inf	0.42265	1.01676	0	0	3.05027	0	0	0	0	0	5	0	0	0	0	low
359	PC-3p-79639_30	CATCTAATACAACAAAGTCGA	down	-inf	-inf	0.42265	2.44021	0	0	7.32064	0	0	0	0	0	12	0	0	0	0	low
360	PC-5p-122679_16	CATGAGCATCGCCATTACCTGG	up	inf	inf	0.42265	0	1.37972	0	0	0	4.13915	0	0	0	0	0	11	0	0	low
361	PC-3p-49791_53	TATGTTTGAGGTAAGAATCCA	up	inf	inf	0.42265	0	0.627144	0	0	0	1.88143	0	0	0	0	0	5	0	0	middle
362	PC-3p-67585_37	GCAAGTTTCCCTGGCTAGGC	up	inf	inf	0.42265	0	3.76287	0	0	0	11.2886	0	0	0	0	0	30	0	0	middle
363	PC-5p-97147_23	CAAATTGGCTGTCAACTGTGG	down	-inf	-inf	0.42265	4.67707	0	0	14.0312	0	0	0	0	0	23	0	0	0	0	middle
364	PC-3p-128518_15	TCTTGGATCCGTCATCATCTC	up	inf	inf	0.42265	0	0.501715	0	0	0	1.50515	0	0	0	0	0	4	0	0	low
365	PC-5p-225396_6	ACATTATAAATACATTGGGGCTCA	down	-inf	-inf	0.42265	1.22011	0	0	3.66032	0	0	0	0	0	6	0	0	0	0	low
366	PC-3p-167404_10	TGTTTGGGATAGAATTTCATG	down	-inf	-inf	0.42265	1.01676	0	0	3.05027	0	0	0	0	0	5	0	0	0	0	low
367	PC-5p-60095_42	AATGGATGATGTGACATATATGTG	up	inf	inf	0.42265	0	3.88829	0	0	0	11.6649	0	0	0	0	0	31	0	0	middle
368	PC-3p-263109_6	AATACAGTTGGGAACTGTGAGCTT	down	-inf	-inf	0.42265	1.22011	0	0	3.66032	0	0	0	0	0	6	0	0	0	0	low
369	PC-5p-146807_13	ACTAGTGTGGTAGAAAGAACC	down	-inf	-inf	0.42265	6.71059	0	0	20.1318	0	0	0	0	0	33	0	0	0	0	middle
370	PC-3p-166557_10	TTAACGAGCCTTGGTAACTTT	down	-inf	-inf	0.42265	1.01676	0	0	3.05027	0	0	0	0	0	5	0	0	0	0	low
371	PC-3p-169317_10	CCAACAACGGCCTAGGCGAAGA	down	-inf	-inf	0.42265	2.44021	0	0	7.32064	0	0	0	0	0	12	0	0	0	0	low
372	PC-3p-80725_29	ACCCAATGATCACTAAAAGACAAA	down	-inf	-inf	0.42265	1.42346	0	0	4.27037	0	0	0	0	0	7	0	0	0	0	low
373	PC-5p-74276_32	ATTATAAATGCATTGGAGCTCACT	up	inf	inf	0.42265	0	1.25429	0	0	0	3.76287	0	0	0	0	0	10	0	0	low
374	PC-5p-186684_8	CCTCGACATTAGCATGGCCATT	down	-inf	-inf	0.42265	1.14159	0	3.42477	0	0	0	0	0	5	0	0	0	0	0	low
375	PC-3p-115860_18	TCCATATAAGTTTGGGATAGAATC	down	-inf	-inf	0.42265	1.01676	0	0	3.05027	0	0	0	0	0	5	0	0	0	0	low
376	PC-5p-186477_8	AATGTAGAAAACCGCACTCAACT	down	-inf	-inf	0.42265	1.22011	0	0	3.66032	0	0	0	0	0	6	0	0	0	0	low
377	PC-5p-80590_29	AAAAGAGATCTGAGGTTCAATGCC	up	inf	inf	0.42265	0	2.38315	0	0	0	7.14944	0	0	0	0	0	19	0	0	low
378	PC-5p-85915_27	ACTTGTGGAATCTCAAATCAAATT	up	inf	inf	0.42265	0	1.756	0	0	0	5.26801	0	0	0	0	0	14	0	0	low
379	PC-3p-127971_15	CAGGCGTTGCTTTGAGAACTGG	down	-inf	-inf	0.42265	1.62681	0	0	4.88043	0	0	0	0	0	8	0	0	0	0	low
380	PC-3p-56616_46	CTTTAAAAAATCGAGTTAGT	down	-inf	-inf	0.42265	0.508378	0	0	1.52513	0	0	0	0	0	2.5	0	0	0	0	middle
381	PC-5p-348179_5	ATAAATGCATTGGACTTCACTTCT	down	-inf	-inf	0.42265	1.01676	0	0	3.05027	0	0	0	0	0	5	0	0	0	0	low
382	PC-5p-164821_11	AATGTTAAAATTGTTGTCGAGACC	down	-inf	-inf	0.42265	2.23686	0	0	6.71059	0	0	0	0	0	11	0	0	0	0	low
383	PC-5p-113779_18	ACTCCTGTGGATACGTGCTATACC	down	-inf	-inf	0.42265	2.03351	0	0	6.10053	0	0	0	0	0	10	0	0	0	0	low
384	PC-5p-114270_18	TTGATCTTCATCTCCCTCAAA	up	inf	inf	0.42265	0	0.752573	0	0	0	2.25772	0	0	0	0	0	6	0	0	low
385	PC-5p-172836_10	TGTGCAAATGCAGTGTCTGAC	down	-inf	-inf	0.42265	4.47372	0	0	13.4212	0	0	0	0	0	22	0	0	0	0	middle
386	PC-3p-160348_11	TTGCAGTCAAAATCGATCGATC	up	inf	inf	0.42265	0	1.37972	0	0	0	4.13915	0	0	0	0	0	11	0	0	low
387	PC-5p-114899_18	ATACCTCAAAATTTACCTCAAACT	down	-inf	-inf	0.42265	1.22011	0	0	3.66032	0	0	0	0	0	6	0	0	0	0	low
388	PC-5p-229960_6	ACAATCCAACTGCAACACTTGTGT	up	inf	inf	0.42265	0	1.37972	0	0	0	4.13915	0	0	0	0	0	11	0	0	low
389	PC-5p-239615_6	GTGGCACCAGCAAGATTCACA	up	inf	inf	0.42265	0	0.627144	0	0	0	1.88143	0	0	0	0	0	5	0	0	low
390	PC-5p-113497_18	CAACGTGGCTCGATTTGAACAGT	down	-inf	-inf	0.42265	1.22011	0	0	3.66032	0	0	0	0	0	6	0	0	0	0	middle
391	PC-5p-143356_13	AAATGCGTTGGGACCCACTTCTCA	down	-inf	-inf	0.42265	1.01676	0	0	3.05027	0	0	0	0	0	5	0	0	0	0	low
392	PC-3p-115452_18	ATGGACCCAATCATCACTAAAAGA	up	inf	inf	0.42265	0	0.878002	0	0	0	2.63401	0	0	0	0	0	7	0	0	middle
393	PC-3p-178630_9	ATTGGCAACTGCGAGCTTAGT	down	-inf	-inf	0.42265	1.83016	0	0	5.49048	0	0	0	0	0	9	0	0	0	0	low
394	PC-3p-121847_17	ATGTGTAAGTAGTACAAAAGTAGT	up	inf	inf	0.42265	0	1.37972	0	0	0	4.13915	0	0	0	0	0	11	0	0	low
395	PC-3p-86650_26	ATGATGTATGAATGAATAACCTCC	up	inf	inf	0.42265	0	1.12886	0	0	0	3.38658	0	0	0	0	0	9	0	0	low
396	PC-3p-67086_37	TTCTGAACCTCAAGACTCGCT	down	-inf	-inf	0.42265	1.01676	0	0	3.05027	0	0	0	0	0	5	0	0	0	0	middle
397	PC-3p-153140_12	ATCTTTTAGTGAGAAGTGGACACC	up	inf	inf	0.42265	0	1.50515	0	0	0	4.51544	0	0	0	0	0	12	0	0	low
398	PC-3p-181691_9	CTCGTTTAATACCTCTGCTAGC	up	inf	inf	0.42265	0	1.19157	0	0	0	3.57472	0	0	0	0	0	9.5	0	0	low
399	PC-3p-71676_34	CTTTGAAAGACCGCGCAACTT	down	-inf	-inf	0.42265	3.66032	0	0	10.981	0	0	0	0	0	18	0	0	0	0	middle
400	PC-5p-220503_7	AAGCAGCTAGTATGAAGGATTGTC	up	inf	inf	0.42265	0	0.878002	0	0	0	2.63401	0	0	0	0	0	7	0	0	low
401	PC-5p-120381_17	AAAAACTAACTCGGTCTTTCGAA	down	-inf	-inf	0.42265	1.42346	0	0	4.27037	0	0	0	0	0	7	0	0	0	0	middle
402	PC-3p-89042_25	CAAGTTATCCTTGGCTATGCTT	up	inf	inf	0.42265	0	3.76287	0	0	0	11.2886	0	0	0	0	0	30	0	0	middle
403	vvi-miR3630-3p_L-3	GGGAATCTCTCTGATGCAC	down	0.0633567	-3.98036	0.422822	40.6776	2.5772	0	5.18545	116.847	1.50515	0	6.22645	0	8.5	24	4	0	6.5	high
404	PC-3p-67388_37	TTTGTCAAGGAGCATCACGAT	down	0.288973	-1.791	0.42359	2.60431	0.752573	1.71239	6.10053	0	2.25772	0	0	2.5	10	0	6	0	0	low
405	gma-MIR5368-p3_1ss2GA	CAAGGGACAGTCTCAGGTAGA	down	0.267113	-1.90448	0.425057	18.0785	4.82901	10.6168	43.6188	0	14.487	0	0	15.5	71.5	0	38.5	0	0	middle
406	PC-5p-73262_33	TATATGTTGATAACTGGGATA	down	0.306948	-1.70393	0.426975	4.90359	1.50515	3.42477	11.286	0	4.51544	0	0	5	18.5	0	12	0	0	middle
407	gma-miR6300_R+7	GTCGTTGTAGTATAGTGGTGAGTAT	down	0.0315661	-4.98548	0.427087	428.579	13.5286	3.42477	14.0312	1268.28	6.58501	20.1109	13.8898	5	23	260.5	17.5	8.5	14.5	high
408	osa-miR156f-3p_2ss13TA14TC	GCTCACTTCTCTACCTGTCAGC	up	5.07286	2.3428	0.427206	1.70171	8.63253	2.05486	3.05027	0	3.38658	0	22.511	3	5	0	9	0	23.5	middle
409	osa-miR5083_L+3	TACAGACTACAATTATCTGATCA	down	0.013639	-6.19612	0.427938	55.178	0.752573	0	0	165.534	2.25772	0	0	0	0	34	6	0	0	middle
410	osa-MIR5083-p5_1ss19GT	ATGGATCCTTCTGAGCCTT	down	0.282436	-1.824	0.4288	15.1202	4.27049	0	8.84577	36.5148	6.58501	0	6.22645	0	14.5	7.5	17.5	0	6.5	middle
411	osa-MIR5083-p3_1ss19GT	ATGGATCCTTCTGAGCCTT	down	0.282436	-1.824	0.4288	15.1202	4.27049	0	8.84577	36.5148	6.58501	0	6.22645	0	14.5	7.5	17.5	0	6.5	middle
412	gma-MIR5368-p5_1ss6TC	CTGTTCCCTGGGATTGGCTTTG	down	0.333718	-1.5833	0.431906	36.4577	12.1666	13.0141	84.1873	12.1716	36.4998	0	0	19	138	2.5	97	0	0	middle
413	vvi-miR3630-3p_L-2	TGGGAATCTCTCTGATGCAC	down	0.149695	-2.7399	0.43256	30.1665	4.51579	3.76725	3.96535	82.767	3.01029	0	10.5371	5.5	6.5	17	8	0	11	high
414	PC-3p-94913_23	TGAAAGAACGGCTTAGATGGT	down	0.416294	-1.26432	0.432752	3.83509	1.59653	4.79468	6.71059	0	0	0	4.78958	7	11	0	0	0	5	low
415	PC-3p-63836_39	CTAAAAGACAAGCCCATGTATGT	down	0.11701	-3.09529	0.433605	9.11154	1.06615	1.71239	25.6222	0	3.19844	0	0	2.5	42	0	8.5	0	0	middle
416	PC-5p-70320_35	TGAGGTTGTCTTTTAGTGGTG	down	0.410155	-1.28576	0.434703	3.82261	1.56786	4.45221	7.01561	0	4.70358	0	0	6.5	11.5	0	12.5	0	0	low
417	vvi-miR3630-3p_L-2_1ss22CT	TGGGAATCTCTCTGATGCAT	down	0.0432279	-4.53189	0.434758	72.0169	3.11314	0	1.83016	214.22	2.63401	0	6.70541	0	3	44	7	0	7	high
418	PC-5p-120927_17	TATCAGTGTATGGACAGCT	down	0.0317342	-4.97782	0.435077	50.3093	1.59653	0	0	150.928	0	0	4.78958	0	0	31	0	0	5	middle
419	vvi-miR3630-3p_L-3_1ss22CT	GGGAATCTCTCTGATGCAT	down	0.0537738	-4.21695	0.435975	44.4279	2.38906	0	1.83016	131.453	0.940716	0	6.22645	0	3	27	2.5	0	6.5	middle
420	PC-5p-74008_33	TAAACTCTCAATTCTGAACTG	down	0.342452	-1.54603	0.436412	2.1976	0.752573	1.71239	4.88043	0	2.25772	0	0	2.5	8	0	6	0	0	low
421	vvi-miR3630-3p_L-3R-1	GGGAATCTCTCTGATGCA	down	0.0942983	-3.40662	0.438742	15.1767	1.43114	1.71239	0	43.8178	0.940716	0	3.35271	2.5	0	9	2.5	0	3.5	middle
422	vvi-miR3630-3p_L-4	GGAATCTCTCTGATGCAC	down	0.061541	-4.02231	0.439652	87.1312	5.36214	0	3.35529	258.038	1.12886	10.6469	4.31062	0	5.5	53	3	4.5	4.5	high
423	osa-miR162a	TCGATAAACCTCTGCATCCAG	up	1.17101	0.227753	0.440998	626.068	733.131	589.061	700.036	589.106	948.618	670.757	580.018	860	1147.5	121	2521	283.5	605.5	high
424	gma-MIR4995-p5_1ss20GC_1	AGTGGCTTGGTTAAGGGAAC	down	0.325772	-1.61806	0.443442	2.50263	0.815287	1.71239	5.79551	0	2.44586	0	0	2.5	9.5	0	6.5	0	0	low
425	gma-MIR4995-p5_1ss20GC_2	AGTGGCTTGGTTAAGGGAACCC	down	0.325772	-1.61806	0.443442	2.50263	0.815287	1.71239	5.79551	0	2.44586	0	0	2.5	9.5	0	6.5	0	0	low
426	osa-miR319a-3p.2-3p_R+1	TTGGACTGAAGGGTGCTCCCT	down	0.0552055	-4.17904	0.444559	3.78672	0.209048	0	0	11.3602	0.627144	0	0	0	0	2.33333	1.66667	0	0	middle
427	PC-3p-23545_123	CATGCAGATCAAACTACACCCATT	down	0.0553192	-4.17608	0.444605	22.6736	1.25429	0	68.0209	0	3.76287	0	0	0	111.5	0	10	0	0	middle
428	gma-miR408a-3p_L-1R+4	TGCACTGCCTCTTCCCTGGCTTTT	down	0.0562121	-4.15297	0.444918	18.3927	1.03389	0	0	55.178	1.50515	0	1.59653	0	0	11.3333	4	0	1.66667	middle
429	mdm-miR408a_L-1R+4	TGCACTGCCTCTTCCCTGGCTTTT	down	0.0562121	-4.15297	0.444918	18.3927	1.03389	0	0	55.178	1.50515	0	1.59653	0	0	11.3333	4	0	1.66667	middle
430	cme-MIR172c-p5	GTAGCATCTTCAAGATTCAC	down	0.43585	-1.19809	0.44504	1.29501	0.56443	2.05486	1.83016	0	1.69329	0	0	3	3	0	4.5	0	0	low
431	mtr-MIR2592bi-p3_2ss8TC19AT_1	ATTCCCACTGTCCCTGTCT	up	1.74449	0.802808	0.446044	9.35054	16.3119	5.47964	22.572	0	7.52573	21.2939	20.1162	8	37	0	20	9	21	middle
432	mtr-MIR2592bi-p3_2ss8TC19AT_2	ATTCCCACTGTCCCTGTCTA	up	1.74449	0.802808	0.446044	9.35054	16.3119	5.47964	22.572	0	7.52573	21.2939	20.1162	8	37	0	20	9	21	middle
433	PC-5p-32386_87	CAAAGCGTCAACAAGAAGATC	down	0.365426	-1.45235	0.446603	15.0408	5.49629	10.9593	34.163	0	9.78345	0	6.70541	16	56	0	26	0	7	middle
434	PC-5p-1745_1642	TGCAAACGCCTTAATTCGTCA	down	0.39853	-1.32724	0.451694	212.797	84.8057	169.869	468.521	0	158.417	61.5157	34.485	248	768	0	421	26	36	middle
435	vvi-miR3630-3p_L-2R-1_1ss20CT	TGGGAATCTCTCTGATGTA	down	0.122535	-3.02873	0.452566	54.6755	6.69968	0	5.79551	158.231	0.940716	0	19.1583	0	9.5	32.5	2.5	0	20	high
436	aof-miR398_1ss21GT	TGTGTTCTCAGGTCGCCCCTT	down	0.208935	-2.25887	0.453321	141.238	29.5095	42.1247	381.588	0	65.8501	5.91497	16.7635	61.5	625.5	0	175	2.5	17.5	middle
437	osa-miR396a-3p_R+1	GTTCAATAAAGCTGTGGGAAA	up	1.86392	0.898342	0.459596	59.832	111.522	32.1929	10.981	136.322	55.6904	68.6136	210.263	47	18	28	148	29	219.5	high
438	PC-5p-30939_92	TTCACAACTGCGGTCTTAGTTA	down	0.254565	-1.97389	0.461344	4.43447	1.12886	1.71239	11.591	0	3.38658	0	0	2.5	19	0	9	0	0	middle
439	aof-miR167b_1ss2GN	TNAAGCTGCCAGCATGATCTGA	down	0.283068	-1.82078	0.46293	57.7854	16.3572	26.0283	147.328	0	45.7188	0	3.35271	38	241.5	0	121.5	0	3.5	middle
440	gma-MIR5368-p3_1ss3GA	CCAAGGGACAGTCTCAGGTA	down	0.285453	-1.80868	0.465288	10.5457	3.01029	4.79468	26.8423	0	9.03088	0	0	7	44	0	24	0	0	middle
441	PC-3p-47313_57	TTTGGGATAGAATTTCATGTA	down	0.201579	-2.31058	0.465775	9.02235	1.81872	2.05486	25.0122	0	5.45615	0	0	3	41	0	14.5	0	0	middle
442	PC-3p-18222_160	AAGACAAATTTCATGTAGGTT	down	0.287066	-1.80054	0.469634	76.4633	21.95	33.5628	195.827	0	65.8501	0	0	49	321	0	175	0	0	middle
443	PC-3p-100300_22	GCTTTCGGCTCTATCTGTCATG	down	0.116694	-3.0992	0.470706	7.52399	0.878002	0	22.572	0	2.63401	0	0	0	37	0	7	0	0	middle
444	aof-miR166a_L-2R+1	TCGGACCAGGCTTCATTCCT	down	0.523185	-0.934607	0.472764	19.5286	10.2171	28.0831	30.5027	0	21.072	0	9.57916	41	50	0	56	0	10	middle
445	PC-3p-52371_50	TATGTTTGGGATAGAATTTCA	down	0.127616	-2.97012	0.475566	5.89718	0.752573	0	17.6915	0	2.25772	0	0	0	29	0	6	0	0	middle
446	aof-miR171c_2ss10GA21CA	TTGAGCCGCATCAATATCTCA	down	0.768646	-0.379609	0.476555	109.411	84.0984	160.622	104.319	63.2924	97.0819	95.8225	59.3908	234.5	171	13	258	40.5	62	middle
447	PC-3p-82679_28	CTAAAAGACAAATTTCATGTA	down	0.134089	-2.89874	0.47848	4.67707	0.627144	0	14.0312	0	1.88143	0	0	0	23	0	5	0	0	middle
448	aof-miR159_1ss1TG	GTTGGATTGAAGGGAGCTCTA	up	1.57144	0.652085	0.478948	19.2503	30.2507	26.0283	31.7228	0	31.9844	11.8299	46.9379	38	52	0	85	5	49	middle
449	gma-MIR6300-p3_1ss6AG	GTGGTGAGTATTCCCGCC	up	3.13104	1.64664	0.479328	0.610053	1.9101	0	1.83016	0	0.940716	0	4.78958	0	3	0	2.5	0	5	middle
450	vvi-miR3630-3p_L-1R-1_1ss20CT	TTGGGAATCTCTCTGATGTA	down	0.137726	-2.86012	0.480128	8.11441	1.11757	0	0	24.3432	0	0	3.35271	0	0	5	0	0	3.5	middle
451	PC-5p-25927_111	TTGTCAATAGCGGTCTTGTCT	down	0.358426	-1.48025	0.480489	3.84938	1.37972	2.39734	9.1508	0	4.13915	0	0	3.5	15	0	11	0	0	low
452	nta-MIR172f-p5_2ss15CG19TA	ATTGGAACGATACAGAGAA	down	0.305655	-1.71003	0.481434	16.9177	5.17097	2.05486	4.88043	43.8178	1.317	14.1959	0	3	8	9	3.5	6	0	middle
453	PC-3p-143024_13	AATGAGATTGTGATACATAAGGTT	down	0.142341	-2.81258	0.48223	2.64356	0.376287	0	7.93069	0	1.12886	0	0	0	13	0	3	0	0	low
454	gma-miR6300_R+5	GTCGTTGTAGTATAGTGGTGAGT	down	0.529852	-0.916339	0.482946	150.793	79.898	63.0158	72.9014	316.462	66.979	74.5286	98.1864	92	119.5	65	178	31.5	102.5	middle
455	gra-miR167a_L-2R+2	AGATCATCTTGCAGCTTCAAT	up	2.48274	1.31193	0.483277	5.23805	13.0047	1.71239	1.83016	12.1716	2.44586	5.91497	30.6533	2.5	3	2.5	6.5	2.5	32	middle
456	PC-5p-17451_168	CAGAAGATTATCATTCGTCCGA	down	0.524049	-0.932227	0.485943	14.9051	7.81099	23.9734	20.7418	0	17.6855	0	5.7475	35	34	0	47	0	6	middle
457	ptc-miR6478_R+1_1ss21GA	CCGACCTTAGCTCAGTTGGTAG	down	0.459826	-1.12084	0.486586	10.2123	4.69588	1.71239	7.01561	21.9089	2.25772	11.8299	0	2.5	11.5	4.5	6	5	0	middle
458	stu-miR391-5p_2ss1TC2AT	CTCGCAGGAGAGATGATGCTG	down	0.492641	-1.02139	0.486797	84.1974	41.479	81.1671	171.425	0	74.1284	37.8558	12.4529	118.5	281	0	197	16	13	middle
459	hbr-MIR6173-p5_6	GATTAGATACCCCAGTAGTCC	down	0.154202	-2.6971	0.487692	2.44021	0.376287	0	7.32064	0	1.12886	0	0	0	12	0	3	0	0	low
460	hbr-MIR6173-p5_7	TTAGATACCCCAGTAGTCC	down	0.154202	-2.6971	0.487692	2.44021	0.376287	0	7.32064	0	1.12886	0	0	0	12	0	3	0	0	low
461	hbr-MIR6173-p5_1	CGCTGTGCGTATCGACCC	down	0.154202	-2.6971	0.487692	2.44021	0.376287	0	7.32064	0	1.12886	0	0	0	12	0	3	0	0	low
462	hbr-MIR6173-p5_5	CTGTGCGTATCGACCCGTG	down	0.154202	-2.6971	0.487692	2.44021	0.376287	0	7.32064	0	1.12886	0	0	0	12	0	3	0	0	low
463	hbr-MIR6173-p3_1	CGCTGTGCGTATCGACCC	down	0.154202	-2.6971	0.487692	2.44021	0.376287	0	7.32064	0	1.12886	0	0	0	12	0	3	0	0	low
464	hbr-MIR6173-p5_2	CGCTGTGCGTATCGACCCG	down	0.154202	-2.6971	0.487692	2.44021	0.376287	0	7.32064	0	1.12886	0	0	0	12	0	3	0	0	low
465	hbr-MIR6173-p3_2	CGTATCGACCCGTGCAGT	down	0.154202	-2.6971	0.487692	2.44021	0.376287	0	7.32064	0	1.12886	0	0	0	12	0	3	0	0	low
466	hbr-MIR6173-p5_3	CGCTGTGCGTATCGACCCGTG	down	0.154202	-2.6971	0.487692	2.44021	0.376287	0	7.32064	0	1.12886	0	0	0	12	0	3	0	0	low
467	hbr-MIR6173-p5_4	CGTATCGACCCGTGCAGT	down	0.154202	-2.6971	0.487692	2.44021	0.376287	0	7.32064	0	1.12886	0	0	0	12	0	3	0	0	low
468	aof-miR167a	TGAAGCTGCCAGCATGATCTA	down	0.550393	-0.861467	0.489369	2.47586	1.36269	3.76725	3.66032	0	1.69329	0	2.39479	5.5	6	0	4.5	0	2.5	middle
469	aof-miR167b_L-1R+1	GAAGCTGCCAGCATGATCTGAT	down	0.370464	-1.43259	0.489393	72.8867	27.0019	41.4398	177.22	0	64.7213	0	16.2846	60.5	290.5	0	172	0	17	middle
470	aof-miR166c_3ss17CT20CT21CT	TCGGACCAGGCTTCATTCCTT	down	0.551685	-0.858084	0.491173	999.878	551.617	1025.72	1883.84	90.0699	955.391	162.07	537.391	1497.5	3088	18.5	2539	68.5	561	high
471	osa-miR156a_L+1R-1	CTGACAGAAGAGAGTGAGCA	down	0.166064	-2.59019	0.49324	2.64356	0.439001	0	7.93069	0	1.317	0	0	0	13	0	3.5	0	0	low
472	PC-5p-25091_115	TAGGGTCTTTTACATGGTAC	down	0.353487	-1.50027	0.494886	14.4842	5.12	6.84955	36.6032	0	8.65459	0	6.70541	10	60	0	23	0	7	middle
473	PC-5p-27960_102	TTGTGTATGGCCCGGCCCATC	down	0.550351	-0.861576	0.499891	6.36088	3.50072	9.93184	9.1508	0	7.14944	0	3.35271	14.5	15	0	19	0	3.5	low
474	gma-MIR5368-p5_2ss13GA17AG	AGCTTAGGTGGAAGGCGAAGAA	down	0.181414	-2.46264	0.500553	3.45697	0.627144	0	10.3709	0	1.88143	0	0	0	17	0	5	0	0	middle
475	PC-5p-81333_29	TTTAAAGATCGAGTCTTGTAC	up	1.97484	0.981732	0.503273	8.58526	16.9545	9.58937	16.1664	0	16.5566	34.3068	0	14	26.5	0	44	14.5	0	middle
476	aof-miR166a_L-2R+2_2	TCGGACCAGGCTTCATTCCTC	up	1.38446	0.469325	0.50646	1013.13	1402.64	1865.82	345.9	827.67	1719.25	865.951	1622.71	2724	567	170	4569	366	1694	high
477	aof-miR166a_L-2R+2_1	TCGGACCAGGCTTCATTCCCC	up	1.38446	0.469325	0.50646	1013.13	1402.64	1865.82	345.9	827.67	1719.25	865.951	1622.71	2724	567	170	4569	366	1694	high
478	aof-MIR167b-p3_1ss5CT	AGATTATGTTGCAGTTTCATC	down	0.801772	-0.318736	0.506533	38.8749	31.1688	32.8778	27.7574	55.9894	21.4483	41.4048	30.6533	48	45.5	11.5	57	17.5	32	middle
479	osa-miR166b-5p_1ss19GT	GGAATGTTGTCTGGCTCGTGG	down	0.605841	-0.722988	0.507611	257.638	156.088	329.463	419.107	24.3432	270.55	47.3197	150.393	481	687	5	719	20	157	middle
480	gma-MIR159a-p3_1ss17GC	TGAAGTGGAGCTCCTTCAAGTC	up	1.90299	0.928272	0.508719	1.91754	3.64908	2.39734	3.35529	0	3.76287	0	7.18437	3.5	5.5	0	10	0	7.5	low
481	osa-MIR5079a-p3_2ss5GT18TC	CAAATGGTTCTCAAAAACTCG	down	0.362454	-1.46413	0.510142	8.52307	3.08922	0	3.66032	21.9089	0	5.91497	3.35271	0	6	4.5	0	2.5	3.5	middle
482	PC-3p-51590_51	ATAGCGGGTTAAGTGGTTTTC	down	0.431391	-1.21293	0.511348	5.23358	2.25772	4.10973	11.591	0	6.77316	0	0	6	19	0	18	0	0	middle
483	hbr-miR6173_L+1	TAGCCGTAAACGATGGATACT	down	0.205603	-2.28207	0.512383	10.3709	2.13229	0	31.1127	0	6.39687	0	0	0	51	0	17	0	0	middle
484	aof-miR171c_1ss2TG	TGGAGCCGCGTCAATATCTCC	up	2.85384	1.5129	0.51525	10.0371	28.6443	24.3159	5.79551	0	75.2573	8.28095	2.39479	35.5	9.5	0	200	3.5	2.5	middle
485	aof-miR827_R-1	TTAGATGACCATCAACAAAC	down	0.684934	-0.545963	0.516056	16.3759	11.2164	14.384	22.572	12.1716	3.76287	23.6599	6.22645	21	37	2.5	10	10	6.5	middle
486	aof-miR396a	TTCCACGGCTTTCTTGAACTG	up	1.27053	0.345429	0.517497	1928.96	2450.8	2071.99	1565.4	2149.51	2538.05	3551.35	1263.01	3025	2566	441.5	6745	1501	1318.5	high
487	PC-5p-69667_35	AGAATCCCTTCGGTTCATGAAC	down	0.215883	-2.21168	0.517527	4.06702	0.878002	0	12.2011	0	2.63401	0	0	0	20	0	7	0	0	middle
488	PC-5p-93296_24	TTGGATAACTACGTGGGATCT	down	0.220289	-2.18253	0.519753	2.84692	0.627144	0	8.54075	0	1.88143	0	0	0	14	0	5	0	0	low
489	PC-5p-108860_19	TTTGTGAATAGTGAGATGGAA	down	0.220289	-2.18253	0.519753	2.84692	0.627144	0	8.54075	0	1.88143	0	0	0	14	0	5	0	0	low
490	aof-miR166a_L-2R+2_1ss19TC	TCGGACCAGGCTTCATCCCCC	down	0.497457	-1.00736	0.519962	1311.16	652.249	1020.92	2859.01	53.5551	1338.26	184.547	433.936	1490.5	4686.5	11	3556.5	78	453	high
491	osa-MIR5079a-p3_2ss6GT19TC_1	TCAAATGGTTCTCAAAAACTC	down	0.220893	-2.17858	0.52006	8.92585	1.97166	0	0	26.7776	0	5.91497	0	0	0	5.5	0	2.5	0	middle
492	osa-MIR5079a-p3_2ss6GT19TC_2	TCAAATGGTTCTCAAAAACTCG	down	0.220893	-2.17858	0.52006	8.92585	1.97166	0	0	26.7776	0	5.91497	0	0	0	5.5	0	2.5	0	middle
493	osa-miR528-5p_1ss16GA	TGGAAGGGGCATGCAAAGGAG	up	1.87228	0.904799	0.520579	8.0483	15.0687	14.384	9.76085	0	32.3606	7.09796	5.7475	21	16	0	86	3	6	middle
494	aof-miR166a_L-2	TCGGACCAGGCTTCATTCC	down	0.657378	-0.605205	0.522288	121.187	79.6658	142.471	199.182	21.9089	116.649	41.4048	80.9439	208	326.5	4.5	310	17.5	84.5	middle
495	osa-miR5072_L-3_1ss4TA	ATCCCCAGCGGAGTCGCCA	down	0.743482	-0.42763	0.522588	18.5134	13.7644	9.24689	17.0815	29.2119	7.71387	15.3789	18.2004	13.5	28	6	20.5	6.5	19	middle
496	gma-miR6300	GTCGTTGTAGTATAGTGG	down	0.341932	-1.54822	0.523263	211.084	72.1765	23.9734	37.2132	572.066	28.5978	63.8816	124.05	35	61	117.5	76	27	129.5	high
497	lja-MIR11069-p5_2ss7TG18AT	TAAGGTGTTGGGTTAAGT	down	0.227246	-2.13768	0.523295	1.93184	0.439001	0	5.79551	0	1.317	0	0	0	9.5	0	3.5	0	0	low
498	aof-MIR536-p5_1ss12GT	CGCACATGGCGTGGGACGATC	up	1.50206	0.58694	0.524875	17.9767	27.002	30.138	23.7921	0	44.7781	14.1959	22.0321	44	39	0	119	6	23	middle
499	osa-miR156a_L+1_1ss9AC	CTGACAGACGAGAGTGAGCAC	up	4.18724	2.066	0.52926	0.610053	2.55444	0	1.83016	0	0	0	7.66333	0	3	0	0	0	8	low
500	PC-3p-48841_54	AATGAGATTGTACCACCTAAGATT	up	1.97227	0.97986	0.533048	1.48588	2.93055	1.71239	2.74524	0	6.39687	0	2.39479	2.5	4.5	0	17	0	2.5	low
501	gma-MIR5368-p3_1ss2AT	GTGAGATACCACTCTGGA	down	0.246724	-2.01903	0.533384	1.52513	0.376287	0	4.5754	0	1.12886	0	0	0	7.5	0	3	0	0	low
502	aof-miR166c_L+2R-2	TCTCGGACCAGGCTTCATCCC	down	0.515332	-0.956427	0.536902	35.868	18.4839	35.6176	71.9863	0	47.7884	0	7.66333	52	118	0	127	0	8	middle
503	aof-miR536_1ss15GT	TCGTGCCACGCTGTTTGCGTC	down	0.538164	-0.893881	0.537019	22.6715	12.201	41.7822	26.2323	0	30.8555	0	5.7475	61	43	0	82	0	6	middle
504	aof-miR166b_L-2_1ss20CT	TCGGACCAGGCTTCATTTT	up	1.42282	0.508749	0.53877	19.0007	27.0345	19.1787	37.8233	0	26.3401	26.0259	28.7375	28	62	0	70	11	30	middle
505	hbr-MIR6173-p5_1ss1AT	TAGCCGTAAACGATGGAT	down	0.264347	-1.9195	0.542732	7.82902	2.06958	0	23.4871	0	6.20873	0	0	0	38.5	0	16.5	0	0	middle
506	PC-5p-72388_33	ATAAATGTATTGGGACCCACTTCT	down	0.264347	-1.9195	0.542732	2.84692	0.752573	0	8.54075	0	2.25772	0	0	0	14	0	6	0	0	low
507	PC-5p-87535_26	CAACTGCGGTCTTAGTTATATG	down	0.264347	-1.9195	0.542732	1.42346	0.376287	0	4.27037	0	1.12886	0	0	0	7	0	3	0	0	low
508	aof-miR396b_R-1	TTCCACAGCTTTCTTGAACT	down	0.422689	-1.24233	0.548347	141.439	59.7846	39.0424	17.6915	367.583	26.9045	106.469	45.98	57	29	75.5	71.5	45	48	high
509	osa-miR396a-3p	GTTCAATAAAGCTGTGGGAA	down	0.429436	-1.21949	0.550417	30.3559	13.0359	11.6442	1.52513	77.8983	2.82215	9.46395	26.8216	17	2.5	16	7.5	4	28	middle
510	gma-miR5368_L+1	GGGACAGTCTCAGGTAGACA	down	0.374203	-1.41811	0.555452	18.603	6.9613	5.47964	50.3294	0	20.8839	0	0	8	82.5	0	55.5	0	0	middle
511	aof-miR159_1ss20TC	TTTGGATTGAAGGGAGCTCCA	up	1.316	0.396157	0.555699	314.22	413.513	360.971	330.954	250.735	347.689	682.587	210.263	527	542.5	51.5	924	288.5	219.5	high
512	gma-MIR5368-p5_1ss2GA	CAAGGGACAGTCTCAGGT	down	0.290047	-1.78564	0.556739	17.0815	4.95444	0	51.2445	0	14.8633	0	0	0	84	0	39.5	0	0	middle
513	aof-miR827	TTAGATGACCATCAACAAACA	down	0.715101	-0.483781	0.560149	536.27	383.488	454.81	937.347	216.655	247.973	559.556	342.934	664	1536.5	44.5	659	236.5	358	high
514	gma-MIR6300-p3_1ss17AG	GTTGTAGTATAGTGGTGAGTA	down	0.521015	-0.940602	0.565032	7.40857	3.85998	0	5.18545	17.0403	5.83244	0	5.7475	0	8.5	3.5	15.5	0	6	middle
515	gma-MIR4995-p5_1ss18GC	TGGCTTGGTTAAGGGAAC	down	0.39529	-1.33902	0.567576	5.5529	2.195	1.71239	14.9463	0	6.58501	0	0	2.5	24.5	0	17.5	0	0	middle
516	PC-3p-11056_265	TGAGAATTCAAAGAGTGAGGA	down	0.535261	-0.901685	0.574005	11.4839	6.1469	8.21946	26.2323	0	10.1597	8.28095	0	12	43	0	27	3.5	0	middle
517	cca-MIR156c-p3_2ss7CT17AC	AGAGCATTGAGAGGACCT	down	0.330434	-1.59757	0.579631	2.84692	0.940716	0	8.54075	0	2.82215	0	0	0	14	0	7.5	0	0	low
518	mtr-MIR169a-p3_2ss7GA20TC	CAAGTTATCCTTGGCTATGCT	up	2.18696	1.12893	0.579971	25.2293	55.1756	56.1663	19.5217	0	144.118	11.8299	9.57916	82	32	0	383	5	10	middle
519	PC-5p-104562_20	CTAATGTGGCACTCATCTAGT	down	0.332128	-1.59019	0.580614	1.32178	0.439001	0	3.96535	0	1.317	0	0	0	6.5	0	3.5	0	0	low
520	aof-MIR159-p5_2ss10GC21AC	GAGCTCCTTCAAGTCCAAATC	up	1.379	0.463625	0.580763	10.171	14.0258	14.0416	16.4714	0	14.8633	7.09796	20.1162	20.5	27	0	39.5	3	21	middle
521	PC-3p-13742_213	CCTCTGTATTCCTCCTCCAC	up	1.53537	0.618586	0.581226	10.5437	16.1885	27.0557	4.5754	0	19.9432	9.46395	19.1583	39.5	7.5	0	53	4	20	middle
522	PC-5p-28352_101	TATCAACTGAGGCCGCATTTT	down	0.514046	-0.96003	0.581898	10.4921	5.39344	8.90441	22.572	0	16.1803	0	0	13	37	0	43	0	0	middle
523	PC-3p-45004_60	CTTTGAAAGACCGCACAACTT	down	0.336441	-1.57157	0.583125	2.23686	0.752573	0	6.71059	0	2.25772	0	0	0	11	0	6	0	0	low
524	PC-3p-112236_19	AATAAGATTGCGCCACCTAAGATT	up	2.96068	1.56593	0.583895	0.508378	1.50515	0	1.52513	0	4.51544	0	0	0	2.5	0	12	0	0	low
525	ptc-MIR6438b-p3_2ss16TA20CT	TATTTCACTATTCTGAGCAT	down	0.34335	-1.54225	0.587172	0.913273	0.313572	2.73982	0	0	0.940716	0	0	4	0	0	2.5	0	0	low
526	aof-miR160b	TGCCTGGTTCCCTGTATGCCA	up	1.70211	0.767322	0.588738	12.2402	20.8341	17.8088	18.9117	0	18.438	0	44.0641	26	31	0	49	0	46	middle
527	osa-MIR5076-p3_2ss16GC17TC	TGTAAGAAGAGTAGACCTTGA	down	0.558125	-0.841339	0.592075	23.5529	13.1455	15.754	54.9048	0	19.9432	11.8299	7.66333	23	90	0	53	5	8	middle
528	PC-3p-76486_31	AATGAGATTGAGCCACCTAAGATT	up	2.83732	1.50453	0.592543	1.01676	2.88486	0	3.05027	0	8.65459	0	0	0	5	0	23	0	0	low
529	osa-miR397a	TCATTGAGTGCAGCGTTGATG	up	1.55895	0.640578	0.59551	7.18496	11.201	13.0141	8.54075	0	14.6752	18.9279	0	19	14	0	39	8	0	middle
530	PC-3p-200401_7	GTTCTTTCTACCACACTAGTTAG	down	0.359805	-1.47471	0.596926	1.22011	0.439001	0	3.66032	0	1.317	0	0	0	6	0	3.5	0	0	low
531	ppe-MIR399f-p5_2ss6TA18CT	AAATGAACAATCACTTTT	down	0.711796	-0.490465	0.600922	7.64953	5.4449	3.76725	4.5754	14.6059	3.01029	7.09796	6.22645	5.5	7.5	3	8	3	6.5	middle
532	ppe-MIR399j-p5_2ss6CA18CT	AAATGAACAATCACTTTT	down	0.711796	-0.490465	0.600922	7.64953	5.4449	3.76725	4.5754	14.6059	3.01029	7.09796	6.22645	5.5	7.5	3	8	3	6.5	middle
533	PC-5p-52616_50	AATCTTAGGTGGTACAATCTCATT	down	0.534609	-0.903445	0.601461	1.99425	1.06615	1.71239	4.27037	0	3.19844	0	0	2.5	7	0	8.5	0	0	low
534	aof-miR166a_L-1R+1	CTCGGACCAGGCTTCATTCCC	down	0.645583	-0.631326	0.604231	120.3	77.6636	112.333	236.396	12.1716	143.177	18.9279	70.8858	164	387.5	2.5	380.5	8	74	middle
535	PC-5p-37664_74	TTGCTTGGTGCAGTTTGGAAGC	down	0.61141	-0.709787	0.604999	5.89357	3.60339	5.47964	12.2011	0	6.02058	0	4.78958	8	20	0	16	0	5	middle
536	PC-5p-19771_148	TGACAAATCCGAATCGTTCATA	down	0.693817	-0.527373	0.608535	35.5889	24.6922	40.4123	7.93069	58.4237	17.6855	49.6857	6.70541	59	13	12	47	21	7	middle
537	ata-miR169d-3p_L+2R-1_1ss14CT	TGGGCAAGTTGTCTTTGGCTAC	down	0.385506	-1.37518	0.612477	1.62681	0.627144	0	4.88043	0	1.88143	0	0	0	8	0	5	0	0	low
538	PC-5p-43974_62	ATGTGCCGTCCGACGAATGAGACC	up	2.5906	1.37329	0.612787	1.01676	2.63401	0	3.05027	0	7.90202	0	0	0	5	0	21	0	0	middle
539	ptc-miR172h-5p_1ss2GT	GTAGCACCATCAAGATTCACA	up	1.45985	0.545824	0.613044	70.5983	103.063	101.716	95.4733	14.6059	92.0021	21.2939	195.894	148.5	156.5	3	244.5	9	204.5	middle
540	osa-MIR444b-p5	TGTCTCAAGCTTGCTGCCTCC	up	1.28886	0.366099	0.614346	383.96	494.872	482.208	474.926	194.746	492.183	194.011	798.423	704	778.5	40	1308	82	833.5	high
541	osa-MIR444b-p3	TGTCTCAAGCTTGCTGCCTCC	up	1.28886	0.366099	0.614346	383.96	494.872	482.208	474.926	194.746	492.183	194.011	798.423	704	778.5	40	1308	82	833.5	high
542	aof-miR827_1ss8AG	TTAGATGGCCATCAACAAACA	down	0.7927	-0.335154	0.617273	990.542	785.202	980.17	1587.36	404.098	667.72	1019.74	668.146	1431	2602	83	1774.5	431	697.5	high
543	osa-miR399a	TGCCAAAGGAGAATTGCCCTG	down	0.407975	-1.29345	0.618327	19.9284	8.13029	0	59.7852	0	17.6855	0	6.70541	0	98	0	47	0	7	middle
544	gma-MIR4995-p3_2ss14GC19TC_1	TTGGTTAAGGGAACCCACCGGA	down	0.395391	-1.33865	0.618556	3.96535	1.56786	0	11.896	0	4.70358	0	0	0	19.5	0	12.5	0	0	middle
545	gma-MIR4995-p3_2ss14GC19TC_2	TTGGTTAAGGGAACCCACCGGAGC	down	0.395391	-1.33865	0.618556	3.96535	1.56786	0	11.896	0	4.70358	0	0	0	19.5	0	12.5	0	0	middle
546	PC-3p-83646_28	GACGCTCATTCGGGCAAGATG	down	0.493783	-1.01805	0.619221	4.628	2.28523	1.71239	0	12.1716	0.940716	5.91497	0	2.5	0	2.5	2.5	2.5	0	middle
547	aof-miR164_2ss1TG20CA	GGGAGAAGCAGGGCACGTGAA	down	0.416205	-1.26463	0.621358	6.84955	2.85081	20.5486	0	0	3.76287	0	4.78958	30	0	0	10	0	5	middle
548	bdi-miR528-5p_R+2	TGGAAGGGGCATGCAGAGGAGCA	up	2.46724	1.3029	0.624708	1.01676	2.50858	0	3.05027	0	7.52573	0	0	0	5	0	20	0	0	middle
549	PC-3p-86869_26	ATTCGTCAGACGGAAAGTGAAGTT	up	2.46724	1.3029	0.624708	0.610053	1.50515	0	1.83016	0	4.51544	0	0	0	3	0	12	0	0	low
550	PC-3p-56030_46	CCTCTGTATTCCTCCTCCACA	up	1.66047	0.731591	0.626309	3.11088	5.16552	4.45221	4.88043	0	11.6649	0	3.83166	6.5	8	0	31	0	4	middle
551	PC-3p-112513_18	TCGATCAAGATCCGACGGTTCAAA	up	1.60647	0.683891	0.62984	1.3842	2.22367	1.71239	2.44021	0	1.88143	0	4.78958	2.5	4	0	5	0	5	low
552	aof-miR164	TGGAGAAGCAGGGCACGTGCA	up	1.24658	0.31798	0.63472	1387.29	1729.37	1988.08	1862.19	311.593	1866.38	1010.28	2311.45	2902.5	3052.5	64	4960	427	2413	high
553	aof-miR827_1ss1TG	GTAGATGACCATCAACAAACA	down	0.424056	-1.23767	0.636466	3.25362	1.37972	0	9.76085	0	4.13915	0	0	0	16	0	11	0	0	low
554	gma-MIR5368-p5_1ss9AG	TTTCCTGCGCAGCTTAGG	down	0.427022	-1.22762	0.638341	1.32178	0.56443	0	3.96535	0	1.69329	0	0	0	6.5	0	4.5	0	0	low
555	PC-5p-77985_30	TTGCCTAAAAATCGCGCTCGAT	down	0.431767	-1.21168	0.64135	2.03351	0.878002	0	6.10053	0	2.63401	0	0	0	10	0	7	0	0	low
556	gma-MIR5368-p5_2ss1TC21TC	CCCTGGGATTGGCTTTGGGCC	down	0.464514	-1.10621	0.643014	14.7162	6.83587	2.05486	42.0937	0	20.5076	0	0	3	69	0	54.5	0	0	middle
557	aof-miR319a	TTGGACTGAAGGGAGCTCCCT	down	0.692849	-0.529388	0.646278	53.1615	36.8329	60.961	98.5236	0	65.2857	23.6599	21.5531	89	161.5	0	173.5	10	22.5	high
558	PC-3p-117215_17	AGTGGGCCTCAATGTATTTAT	down	0.440578	-1.18253	0.646965	1.42346	0.627144	0	4.27037	0	1.88143	0	0	0	7	0	5	0	0	low
559	aof-miR167c_R+1_2	TGAAGCTGCCAGCATGATCTGG	up	1.44622	0.532289	0.647362	7.11367	10.288	5.47964	15.8614	0	10.7242	17.7449	2.39479	8	26	0	28.5	7.5	2.5	middle
560	aof-miR167c_R+1_1	TGAAGCTGCCAGCATGATCTGC	up	1.44622	0.532289	0.647362	7.11367	10.288	5.47964	15.8614	0	10.7242	17.7449	2.39479	8	26	0	28.5	7.5	2.5	middle
561	ath-miR170-3p	TGATTGAGCCGTGTCAATATC	up	1.23841	0.308495	0.647984	137.431	170.197	239.392	26.8423	146.059	163.873	180.998	165.719	349.5	44	30	435.5	76.5	173	middle
562	aof-miR160c	TGCCTGGCTCCCTGTATGCCA	up	1.46277	0.548707	0.649638	17.4701	25.5548	27.3982	25.0122	0	29.7266	0	46.9379	40	41	0	79	0	49	middle
563	ath-miR827_1ss8AG	TTAGATGGCCATCAACAAACT	down	0.623923	-0.68056	0.651097	78.0293	48.6843	48.6318	185.456	0	42.8967	63.8816	39.2746	71	304	0	114	27	41	middle
564	PC-5p-4996_590	TCACTCTTTGAATTCTCAACT	down	0.613917	-0.703884	0.651617	21.152	12.9856	14.0416	49.4143	0	10.536	26.0259	2.39479	20.5	81	0	28	11	2.5	middle
565	PC-5p-118399_17	ATTGTCGGACGGTACTTCAAGTGC	down	0.4578	-1.12721	0.658031	1.36991	0.627144	4.10973	0	0	1.88143	0	0	6	0	0	5	0	0	low
566	gma-MIR5368-p3_2ss7CT17TC	CTTGTGTCAGGACCTACG	down	0.462607	-1.11214	0.661141	1.62681	0.752573	0	4.88043	0	2.25772	0	0	0	8	0	6	0	0	low
567	PC-3p-138104_14	CAGTTGAGAGCCAATTTGAGC	down	0.462607	-1.11214	0.661141	1.62681	0.752573	0	4.88043	0	2.25772	0	0	0	8	0	6	0	0	low
568	PC-5p-1255_2277	AAAACTAACTCGGTCTTTCGAAGG	down	0.718574	-0.476792	0.671395	272.747	195.989	97.9485	140.922	579.369	243.457	224.769	119.739	143	231	119	647	95	125	high
569	mtr-miR319a-3p	TTGGACTGAAGGGAGCTCCC	down	0.717037	-0.47988	0.672194	48.1955	34.558	55.8238	88.7627	0	61.3347	23.6599	18.6794	81.5	145.5	0	163	10	19.5	high
570	aof-miR166b_R-1	TCTCGGACCAGGCTTCATTC	down	0.630648	-0.665092	0.674755	1.19333	0.752573	2.05486	1.52513	0	2.25772	0	0	3	2.5	0	6	0	0	middle
571	PC-5p-168795_10	TAAACTAGCGCGGTCTTTTTT	down	0.485964	-1.04108	0.676366	8.11441	3.94331	0	0	24.3432	0	11.8299	0	0	0	5	0	5	0	middle
572	PC-3p-4499_652	TGCTCACTGCTCTTCTCGTCAGC	down	0.765032	-0.386408	0.678154	95.7292	73.2359	77.3999	180.576	29.2119	98.9634	35.4898	85.2545	113	296	6	263	15	89	middle
573	PC-3p-44517_61	TTTGCCCTTGGTACAATTTCA	up	1.24403	0.315023	0.679039	4.92675	6.12903	6.84955	7.93069	0	6.02058	7.09796	5.26854	10	13	0	16	3	5.5	low
574	mtr-miR319a-3p_L+1	CTTGGACTGAAGGGAGCTCCC	down	0.493447	-1.01903	0.681282	1.52513	0.752573	0	4.5754	0	2.25772	0	0	0	7.5	0	6	0	0	middle
575	PC-5p-116294_18	TTTCACTGTCATTATGTTCACT	down	0.493447	-1.01903	0.681282	2.03351	1.00343	0	6.10053	0	3.01029	0	0	0	10	0	8	0	0	low
576	osa-miR396a-3p_L-1R+1	TTCAATAAAGCTGTGGGAAA	up	1.2124	0.277869	0.681405	31.9701	38.7607	21.9185	20.4368	53.5551	31.0436	60.3327	24.9058	32	33.5	11	82.5	25.5	26	middle
577	PC-5p-33245_85	TTTGAAAAATCGAGTTAGTTTTT	down	0.639247	-0.645554	0.681432	1.07917	0.689859	1.71239	1.52513	0	2.06958	0	0	2.5	2.5	0	5.5	0	0	middle
578	PC-3p-33245_85	TTTGAAAAATCGAGTTAGTTTTT	down	0.639247	-0.645554	0.681432	1.07917	0.689859	1.71239	1.52513	0	2.06958	0	0	2.5	2.5	0	5.5	0	0	middle
579	aof-miR396b_1ss21GA	TTCCACAGCTTTCTTGAACTA	up	1.23536	0.30493	0.682768	171.264	211.573	205.144	40.8736	267.776	156.723	334.787	143.208	299.5	67	55	416.5	141.5	149.5	high
580	PC-3p-40989_67	TTTTGAAAAACCGTGGGTAATT	up	1.42394	0.509887	0.683049	2.13338	3.0378	2.73982	3.66032	0	3.19844	5.91497	0	4	6	0	8.5	2.5	0	low
581	osa-MIR159e-p5_2ss18AC21AC	TTTGCATGACTCGGGAGCTGC	down	0.683161	-0.549702	0.685562	70.7264	48.3175	60.276	151.903	0	96.3293	18.9279	29.6954	88	249	0	256	8	31	high
582	gma-MIR4995-p3_1ss18GC	TGGCTTGGTTAAGGGAACCC	down	0.504662	-0.98661	0.688677	1.11843	0.56443	0	3.35529	0	1.69329	0	0	0	5.5	0	4.5	0	0	low
583	vca-miR168b-3p_2ss3CT12CT	CCTGCCTTGCATCAACTGAAT	down	0.737397	-0.439487	0.692722	5177.57	3817.93	3760.74	10545.1	1226.9	6640.89	2315.12	2497.77	5490.5	17285.5	252	17648.5	978.5	2607.5	high
584	PC-3p-195514_8	TTATGACAGAACAACCTCATC	down	0.514008	-0.960138	0.694865	1.22011	0.627144	0	3.66032	0	1.88143	0	0	0	6	0	5	0	0	low
585	PC-3p-225325_6	ATCGTTGTTCGGGATAGCGGCACC	down	0.514008	-0.960138	0.694865	1.22011	0.627144	0	3.66032	0	1.88143	0	0	0	6	0	5	0	0	low
586	aof-miR166a_L-2R+2_1ss4CN	TNGGACCAGGCTTCATTCCCC	down	0.675748	-0.565443	0.702739	43.1904	29.1858	32.8778	96.6934	0	62.6517	0	24.9058	48	158.5	0	166.5	0	26	middle
587	aof-miR171a	TGATTGAGCCGTGCCAATATC	up	1.15634	0.209568	0.70419	1309.09	1513.76	1975.75	425.207	1526.32	1577.96	1671.57	1291.75	2884.5	697	313.5	4193.5	706.5	1348.5	high
588	PC-3p-94764_23	ATCCTCGGACGGCACATGATGTGC	up	1.85043	0.887859	0.71245	0.711729	1.317	0	2.13519	0	3.95101	0	0	0	3.5	0	10.5	0	0	low
589	aof-miR171c	TTGAGCCGCGTCAATATCTCC	down	0.883611	-0.178517	0.717641	963.5	851.359	1474.02	759.211	657.267	982.672	634.084	937.321	2152	1244.5	135	2611.5	268	978.5	high
590	PC-5p-148333_12	TTCAGGTACTGAGTTTTCAAG	down	0.54936	-0.864177	0.718434	1.36991	0.752573	4.10973	0	0	2.25772	0	0	6	0	0	6	0	0	low
591	osa-miR166h-5p_2ss5TC8TC	GGAACGTCGGCTGGCTCGAGG	down	0.752742	-0.409773	0.720206	117.004	88.0738	152.745	198.267	0	174.973	26.0259	63.2224	223	325	0	465	11	66	middle
592	aof-miR159	TTTGGATTGAAGGGAGCTCTA	up	1.1505	0.202266	0.724001	19441.5	22367.5	25647.4	26530.3	6146.67	26506	15207.4	25389.1	37444	43488.5	1262.5	70441	6427.5	26504.5	high
593	PC-3p-101450_21	AATGAGATTGCGCCACCTAAGAGT	down	0.560736	-0.834607	0.726059	1.11843	0.627144	0	3.35529	0	1.88143	0	0	0	5.5	0	5	0	0	low
594	bdi-miR7782-3p_R-5_1ss3CG	ACGTGCTCTGATACCATGT	down	0.713117	-0.48779	0.726096	41.5207	29.6091	14.384	10.3709	99.8072	22.7653	22.4769	43.5852	21	17	20.5	60.5	9.5	45.5	high
595	aof-miR166a_1ss21CA	TCTCGGACCAGGCTTCATTCA	down	0.746365	-0.422046	0.729552	7.51676	5.61025	10.9593	11.591	0	12.0412	0	4.78958	16	19	0	32	0	5	middle
596	PC-3p-88026_26	TTTTGAAAAACCGTGGGTAAT	up	1.4636	0.54952	0.729572	1.01676	1.48812	0	3.05027	0	2.06958	0	2.39479	0	5	0	5.5	0	2.5	low
597	nta-MIR172f-p3_2ss14CG18TA	TTGGAACGATACAGAGAA	down	0.566958	-0.818686	0.730236	4.86865	2.76032	0	0	14.6059	0	8.28095	0	0	0	3	0	3.5	0	middle
598	osa-MIR444c-p5_1ss1TC	CTGTCTCAAGCTTGCTGCCTCC	down	0.569362	-0.812581	0.731851	1.32178	0.752573	0	3.96535	0	2.25772	0	0	0	6.5	0	6	0	0	middle
599	PC-3p-57073_45	ATTCCCGCCTTGCACCAACTGAATT	up	1.66257	0.733418	0.734642	2.56505	4.26458	3.42477	4.27037	0	12.7937	0	0	5	7	0	34	0	0	middle
600	PC-3p-34888_80	CAACAATTACTAAAAGACAAGC	down	0.690425	-0.534444	0.736681	4.7234	3.26115	6.84955	7.32064	0	9.78345	0	0	10	12	0	26	0	0	middle
601	mtr-miR172c-5p_1ss9AT	GTAGCATCTTCAAGATTCACA	up	1.72707	0.788323	0.738339	0.508378	0.878002	0	1.52513	0	2.63401	0	0	0	2.5	0	7	0	0	low
602	PC-5p-14227_206	ATGTGCTTCGGAAAATGTGCC	down	0.763373	-0.38954	0.748023	16.6853	12.7371	22.6035	27.4524	0	26.7163	0	11.495	33	45	0	71	0	12	middle
603	aof-miR172_R-2	AGAATCTTGATGATGCTGC	up	1.67821	0.746925	0.749677	0.570796	0.957916	1.71239	0	0	0	0	2.87375	2.5	0	0	0	0	3	low
604	PC-5p-3989_733	TTCTGTTGATTGTCATCTAAAC	down	0.748564	-0.417803	0.753982	83.5588	62.5491	53.084	170.815	26.7776	28.7859	150.24	8.62124	77.5	280	5.5	76.5	63.5	9	middle
605	PC-3p-161026_11	ATGTCGTTGTTGGGGATAGTGGCA	down	0.604296	-0.726673	0.755344	1.14159	0.689859	3.42477	0	0	2.06958	0	0	5	0	0	5.5	0	0	low
606	mes-miR828a_L+3_1ss20AG	ACCTCTTGCTCAAATGAGTGTTCCA	up	1.64808	0.720786	0.757006	1.25575	2.06958	3.76725	0	0	6.20873	0	0	5.5	0	0	16.5	0	0	low
607	aof-miR166a_L-1	CTCGGACCAGGCTTCATTCC	up	1.28698	0.363994	0.757561	6.76939	8.7121	7.19202	13.1161	0	11.2886	0	14.8477	10.5	21.5	0	30	0	15.5	middle
608	PC-5p-30417_93	TTTGGAGGTTAGGTAACTATA	down	0.710275	-0.493551	0.757608	3.88502	2.75943	6.16459	5.49048	0	8.2783	0	0	9	9	0	22	0	0	middle
609	aof-miR159_R+1	TTTGGATTGAAGGGAGCTCTAA	down	0.90633	-0.141892	0.758773	523.112	474.112	519.538	755.246	294.553	583.056	401.035	438.247	758.5	1238	60.5	1549.5	169.5	457.5	high
610	osa-miR396a-3p_R+1_1ss10AC	GTTCAATAACGCTGTGGGAAA	down	0.926066	-0.110812	0.759629	24.7437	22.9143	18.4938	21.6569	34.0805	19.1906	21.2939	28.2585	27	35.5	7	51	9	29.5	middle
611	osa-miR156b-3p_2ss8-T12TA	GCTCACTTCTCAATCTGTCAGC	up	1.19188	0.253235	0.761047	8.10185	9.65641	10.2743	14.0312	0	5.6443	11.8299	11.495	15	23	0	15	5	12	middle
612	gma-MIR4995-p5_2ss13GC18TC	TGGTTAAGGGAACCCACCGGAGC	down	0.616809	-0.697104	0.76376	1.11843	0.689859	0	3.35529	0	2.06958	0	0	0	5.5	0	5.5	0	0	low
613	PC-3p-61451_41	AAGTTTGGGGTAAATTTTGAGGTA	down	0.616809	-0.697104	0.76376	0.91508	0.56443	0	2.74524	0	1.69329	0	0	0	4.5	0	4.5	0	0	low
614	PC-3p-312205_5	AATTCGTCAGACGCAACATCAAGT	down	0.616809	-0.697104	0.76376	1.01676	0.627144	0	3.05027	0	1.88143	0	0	0	5	0	5	0	0	low
615	PC-5p-309145_5	TTCACTGTCATTATGTTCACT	down	0.616809	-0.697104	0.76376	1.01676	0.627144	0	3.05027	0	1.88143	0	0	0	5	0	5	0	0	low
616	PC-5p-129182_15	ATAAATGCATTGGAACCCACTTCT	down	0.616809	-0.697104	0.76376	1.01676	0.627144	0	3.05027	0	1.88143	0	0	0	5	0	5	0	0	low
617	PC-3p-112415_18	ATGTCACTCCAAATGTACAACTCC	down	0.616809	-0.697104	0.76376	1.83016	1.12886	0	5.49048	0	3.38658	0	0	0	9	0	9	0	0	low
618	PC-5p-53633_49	ACTTTCGTACTACAAGACTCAAGA	down	0.616809	-0.697104	0.76376	1.83016	1.12886	0	5.49048	0	3.38658	0	0	0	9	0	9	0	0	middle
619	aof-miR166a_L-2R+2_1ss18TA	TCGGACCAGGCTTCAATCCCC	down	0.815643	-0.293991	0.76714	41.1014	33.5241	59.2486	64.0556	0	54.9378	28.3918	17.2425	86.5	105	0	146	12	18	middle
620	sbi-miR159b_R-1	CTTGGATTGAAGGGAGCTCC	up	1.27788	0.353752	0.767576	1.63749	2.09251	3.0823	1.83016	0	2.44586	0	3.83166	4.5	3	0	6.5	0	4	middle
621	aof-miR477a_1ss21GA	ACTCTCCCTCAAGGGCTTCCA	up	1.6037	0.681408	0.768295	1.01676	1.63057	0	3.05027	0	4.89172	0	0	0	5	0	13	0	0	middle
622	PC-3p-81997_28	ATTTTGGAAGTTCGCCTGGAG	down	0.657816	-0.604243	0.771205	5.28713	3.47796	0	15.8614	0	5.6443	0	4.78958	0	26	0	15	0	5	middle
623	PC-5p-5335_555	TTTATTTCTTATGGATTGTCAGT	down	0.815882	-0.293567	0.793669	47.7586	38.9654	43.8371	99.4387	0	56.443	30.7578	29.6954	64	163	0	150	13	31	middle
624	osa-miR396a-3p_R+1_1ss12CT	GTTCAATAAAGTTGTGGGAAA	down	0.664256	-0.590188	0.795563	1.32178	0.878002	0	3.96535	0	2.63401	0	0	0	6.5	0	7	0	0	middle
625	ath-miR8175_L+3	TTCGATCCCCGGCAACGGCGCCA	up	1.48034	0.565931	0.803068	0.508378	0.752573	0	1.52513	0	2.25772	0	0	0	2.5	0	6	0	0	low
626	PC-5p-72810_33	AATCTTAGGTGACGCAATCTCATT	up	1.48034	0.565931	0.803068	1.01676	1.50515	0	3.05027	0	4.51544	0	0	0	5	0	12	0	0	low
627	gma-MIR5368-p5_1ss19TC	CTGGGATTGGCTTTGGGCC	down	0.675553	-0.565859	0.803091	4.27037	2.88486	0	12.8111	0	8.65459	0	0	0	21	0	23	0	0	middle
628	PC-5p-8225_357	TGTGCAAAGTCAAGGCTTGGA	down	0.789862	-0.340328	0.805704	19.0828	15.0728	10.2743	46.9741	0	18.0618	11.8299	15.3267	15	77	0	48	5	16	middle
629	PC-3p-25677_112	CAGGTCATCCTTGGCTTTAGT	up	1.40189	0.487378	0.808219	2.81833	3.95101	4.79468	3.66032	0	11.853	0	0	7	6	0	31.5	0	0	middle
630	mtr-MIR2676f-p5_2ss2AT19GA	TTGGAAAATGTTTTGAGGAAA	down	0.819405	-0.287352	0.814263	8.02695	6.57732	8.21946	15.8614	0	7.90202	11.8299	0	12	26	0	21	5	0	middle
631	aof-miR394	TTGGCATTCTGTCCACCTCC	up	1.1398	0.18878	0.816146	28.2098	32.1535	16.4389	12.2011	55.9894	18.6262	39.0388	38.7956	24	20	11.5	49.5	16.5	40.5	middle
632	PC-3p-6716_443	GAAGGTCTTGATTGAGAGTGG	down	0.810066	-0.303889	0.81674	20.7487	16.8078	28.0831	34.163	0	39.8864	0	10.5371	41	56	0	106	0	11	middle
633	aof-miR479_R-1_1ss8AG	TGAGCCGGACCAATATCACT	up	1.1922	0.253631	0.819083	6.75329	8.0513	12.3292	7.93069	0	2.06958	15.3789	6.70541	18	13	0	5.5	6.5	7	middle
634	osa-miR166d-5p	GGAATGTTGTCTGGCTCGAGG	down	0.879716	-0.18489	0.820391	1329.56	1169.63	1502.45	2086.99	399.229	1772.31	324.14	1412.45	2193.5	3421	82	4710	137	1474.5	high
635	PC-3p-131237_15	AACGTCGTTAATGGGAATAGCAGC	down	0.704925	-0.504459	0.822542	1.42346	1.00343	0	4.27037	0	3.01029	0	0	0	7	0	8	0	0	low
636	PC-5p-130569_15	GGGCACTTCTCACTTGGCAGA	down	0.704925	-0.504459	0.822542	1.42346	1.00343	0	4.27037	0	3.01029	0	0	0	7	0	8	0	0	low
637	aof-miR168a	TCGCTTGGTGCAGGTCGGGAA	down	0.842507	-0.247239	0.824045	6559.34	5526.29	6128.63	12836.1	713.257	10491.1	2181.44	3906.38	8947.5	21041	146.5	27880.5	922	4078	high
638	gma-MIR5368-p3_2	CTGGGATTGGCTTTGGGC	down	0.707517	-0.499164	0.824249	3.45697	2.44586	0	10.3709	0	7.33759	0	0	0	17	0	19.5	0	0	middle
639	gma-MIR5368-p3_1	AGATACCACTCTGGACGAGCTAG	down	0.707517	-0.499164	0.824249	3.45697	2.44586	0	10.3709	0	7.33759	0	0	0	17	0	19.5	0	0	middle
640	bdi-MIR172a-p3_2ss8AG17TA	GATTCACGTCGGGTTCACCA	down	0.867981	-0.204265	0.82601	6.64094	5.76421	9.24689	10.6759	0	3.01029	7.09796	7.18437	13.5	17.5	0	8	3	7.5	middle
641	bdi-MIR172a-p5_2ss8AG17TA	GATTCACGTCGGGTTCACCA	down	0.867981	-0.204265	0.82601	6.64094	5.76421	9.24689	10.6759	0	3.01029	7.09796	7.18437	13.5	17.5	0	8	3	7.5	middle
642	gma-MIR397a-p3_2ss2CT21CA	TTATCGACACTGCACTCAATA	down	0.775467	-0.366862	0.829837	5.36203	4.15808	2.05486	14.0312	0	3.01029	9.46395	0	3	23	0	8	4	0	middle
643	PC-5p-40066_69	TGGATGTAAAATCATGAGGTT	up	1.23259	0.301688	0.830902	4.21682	5.1976	4.10973	8.54075	0	3.76287	11.8299	0	6	14	0	10	5	0	middle
644	sbi-MIR398-p5_2ss5GA18AG	GGGGACGGACTGGGAACG	up	1.27447	0.349898	0.83109	1.11843	1.42541	0	3.35529	0	1.88143	0	2.39479	0	5.5	0	5	0	2.5	middle
645	sbi-MIR398-p3_2ss5GA18AG	GGGGACGGACTGGGAACG	up	1.27447	0.349898	0.83109	1.11843	1.42541	0	3.35529	0	1.88143	0	2.39479	0	5.5	0	5	0	2.5	middle
646	PC-5p-146046_13	TTTCAACTGTGGCCGCGAGTG	down	0.719611	-0.474711	0.832191	1.22011	0.878002	0	3.66032	0	2.63401	0	0	0	6	0	7	0	0	low
647	PC-3p-87405_26	AGTGGGCAAGTTGTCTTTGGC	down	0.78831	-0.343164	0.834911	2.38666	1.88143	4.10973	3.05027	0	5.6443	0	0	6	5	0	15	0	0	low
648	PC-3p-27099_106	AATGAGATTGTGACACATAAGGTT	down	0.781297	-0.356057	0.83925	3.77267	2.94758	3.0823	8.23572	0	8.84273	0	0	4.5	13.5	0	23.5	0	0	low
649	PC-3p-134579_14	CATATAAGTTTGGGATAGAATC	down	0.73248	-0.449139	0.840597	1.36991	1.00343	4.10973	0	0	3.01029	0	0	6	0	0	8	0	0	low
650	osa-miR166l-5p_2ss1GA18AG	AGATTGTTGTCTGGTTCGAGG	up	1.22445	0.292136	0.84155	5.3548	6.5567	13.0141	3.05027	0	13.9226	0	5.7475	19	5	0	37	0	6	middle
651	PC-3p-72548_33	AATGATCACTAAAAGACAAACCCC	up	1.35698	0.4404	0.843493	1.01676	1.37972	0	3.05027	0	4.13915	0	0	0	5	0	11	0	0	middle
652	gra-MIR8776d-p5_2ss15TG18GT	AGGGGAGCAAATGGGATT	down	0.740171	-0.434069	0.845598	1.01676	0.752573	0	3.05027	0	2.25772	0	0	0	5	0	6	0	0	low
653	PC-5p-100416_22	TGGACTCCAATTGGCACAAAC	down	0.740171	-0.434069	0.845598	1.01676	0.752573	0	3.05027	0	2.25772	0	0	0	5	0	6	0	0	low
654	PC-5p-160108_11	CATGAACGCTCGAAGGCCTAGT	down	0.740171	-0.434069	0.845598	1.01676	0.752573	0	3.05027	0	2.25772	0	0	0	5	0	6	0	0	low
655	gma-miR171n_R-1_1ss18CT	TTGAGCCGCGTCAATATTTT	up	1.3459	0.428571	0.847431	0.711729	0.957916	0	2.13519	0	0	0	2.87375	0	3.5	0	0	0	3	low
656	PC-5p-187055_8	GGACTTCTCTCTTTTGGCAGG	up	1.33642	0.418374	0.850842	1.22011	1.63057	0	3.66032	0	4.89172	0	0	0	6	0	13	0	0	low
657	PC-3p-72293_34	TAAGTGGTTCGCACGAGTTCGC	down	0.749127	-0.416718	0.851397	2.5115	1.88143	7.5345	0	0	5.6443	0	0	11	0	0	15	0	0	low
658	PC-5p-12330_236	TCACTCTTTAAATTCTCAACT	up	1.25296	0.325336	0.85433	6.58033	8.24486	4.79468	14.9463	0	2.25772	22.4769	0	7	24.5	0	6	9.5	0	middle
659	PC-3p-26371_109	ACAAGCCCGTCTAGCTCAGT	down	0.8164	-0.292651	0.854565	17.3458	14.1611	8.21946	0	43.8178	0	11.8299	30.6533	12	0	9	0	5	32	middle
660	aof-miR396b_2ss20TC21GA	TTCCACAGCTTTCTTGAACCA	down	0.829718	-0.269307	0.856828	4.87061	4.04123	0	2.44021	12.1716	6.20873	5.91497	0	0	4	2.5	16.5	2.5	0	middle
661	PC-5p-274_11288	TAAGCTTATGGCTAGAGACCC	down	0.883342	-0.178955	0.857271	897.167	792.506	659.954	295.876	1735.67	685.03	1408.95	283.543	963.5	485	356.5	1820.5	595.5	296	high
662	PC-3p-66390_37	AATGAGATTGTGACACCTAAGATT	up	1.31846	0.398857	0.857412	1.14159	1.50515	3.42477	0	0	4.51544	0	0	5	0	0	12	0	0	low
663	ptc-miR156g	TTGACAGAAGATAGAGAGCAC	down	0.803986	-0.314757	0.859359	19.2898	15.5087	4.79468	53.0746	0	12.0412	0	34.485	7	87	0	32	0	36	high
664	aof-miR167b_1ss22AT	TGAAGCTGCCAGCATGATCTGT	up	1.08447	0.116995	0.859614	251.723	272.987	371.245	340.105	43.8178	302.158	294.565	222.236	542	557.5	9	803	124.5	232	middle
665	aof-miR167c_R+1_3	TGAAGCTGCCAGCATGATCTGT	up	1.08447	0.116995	0.859614	251.723	272.987	371.245	340.105	43.8178	302.158	294.565	222.236	542	557.5	9	803	124.5	232	middle
666	bdi-miR164a-3p_2ss10TA20CT	CATGTGCCCATCTTCTCCATC	down	0.868735	-0.203012	0.861227	6.54994	5.69016	12.3292	7.32064	0	9.40716	0	7.66333	18	12	0	25	0	8	middle
667	aof-MIR166b-p5_2ss6GC17TG	AAGAACGAAAGTTGGGGG	down	0.771012	-0.375176	0.865455	0.813404	0.627144	0	2.44021	0	1.88143	0	0	0	4	0	5	0	0	low
668	aof-MIR166b-p3_2ss6GC17TG	AAGAACGAAAGTTGGGGG	down	0.771012	-0.375176	0.865455	0.813404	0.627144	0	2.44021	0	1.88143	0	0	0	4	0	5	0	0	low
669	ath-miR8175_L+4	GTTCGATCCCCGGCAACGGCGCCA	up	1.2953	0.373286	0.8661	1.01676	1.317	0	3.05027	0	3.95101	0	0	0	5	0	10.5	0	0	low
670	PC-5p-1249_2289	GTGATTTTGGTATGGCTCATT	up	1.13815	0.186691	0.868877	1.30749	1.48812	2.39734	1.52513	0	2.06958	0	2.39479	3.5	2.5	0	5.5	0	2.5	middle
671	PC-5p-121256_17	ATGGGAGGTATTGGAAATGT	down	0.7848	-0.349604	0.874224	1.59823	1.25429	4.79468	0	0	3.76287	0	0	7	0	0	10	0	0	low
672	PC-5p-20316_144	AACTTTGGTACTACTAGACTCAAG	up	1.17838	0.236799	0.882922	8.08976	9.53277	4.79468	0	19.4746	23.3298	0	5.26854	7	0	4	62	0	5.5	middle
673	aof-miR160b_1ss12CT	TGCCTGGTTCCTTGTATGCCA	down	0.895742	-0.158845	0.887007	10.2352	9.16812	13.0141	17.6915	0	15.0515	0	12.4529	19	29	0	40	0	13	middle
674	ptc-MIR7840-p5_2ss10CA18GA	AGAGACAGAAACACAAAAGAA	up	1.23362	0.302896	0.890449	1.22011	1.50515	0	3.66032	0	4.51544	0	0	0	6	0	12	0	0	low
675	PC-5p-13637_215	TCTGTCTTCTCCTTCCTAACC	down	0.907892	-0.139407	0.890525	24.3197	22.0796	47.9468	25.0122	0	31.9844	18.9279	15.3267	70	41	0	85	8	16	middle
676	aly-miR165a-3p_R+1	TCGGACCAGGCTTCATCCCCA	down	0.871301	-0.198757	0.890871	4.49749	3.91866	2.5115	10.981	0	7.02401	4.73197	0	3.66667	18	0	18.6667	2	0	middle
677	aof-miR166c_1ss21CA	TCGGACCAGGCTTCATCCCCA	down	0.871301	-0.198757	0.890871	4.49749	3.91866	2.5115	10.981	0	7.02401	4.73197	0	3.66667	18	0	18.6667	2	0	middle
678	lus-miR828a	TCTTGCTCAAATGAGTGTTCCA	up	1.07197	0.100268	0.891157	341.167	365.721	364.396	130.856	528.248	308.931	600.961	187.273	532	214.5	108.5	821	254	195.5	high
679	mes-miR828a_1ss17AG	TCTTGCTCAAATGAGTGTTCCA	up	1.07197	0.100268	0.891157	341.167	365.721	364.396	130.856	528.248	308.931	600.961	187.273	532	214.5	108.5	821	254	195.5	high
680	aof-miR166a	TCTCGGACCAGGCTTCATTCC	down	0.964955	-0.0514668	0.897288	689.223	665.069	759.615	845.534	462.521	834.603	405.767	754.838	1109	1386	95	2218	171.5	788	high
681	aof-miR479_L-1_1ss8AG	GAGCCGGACCAATATCACTC	down	0.822412	-0.282066	0.897765	0.610053	0.501715	0	1.83016	0	1.50515	0	0	0	3	0	4	0	0	middle
682	lja-miR171c_2ss8AG10TC	TGAGCCGGACCAATATCACTC	down	0.92739	-0.108752	0.898355	410.739	380.915	380.15	779.038	73.0297	410.529	304.029	428.188	555	1277	15	1091	128.5	447	high
683	aof-miR479_1ss8AG	TGAGCCGGACCAATATCACTC	down	0.92739	-0.108752	0.898355	410.739	380.915	380.15	779.038	73.0297	410.529	304.029	428.188	555	1277	15	1091	128.5	447	high
684	aof-miR396b	TTCCACAGCTTTCTTGAACTG	up	1.09265	0.127826	0.898471	758.653	828.939	417.822	309.907	1548.23	668.097	1465.73	352.992	610	508	318	1775.5	619.5	368.5	high
685	PC-5p-73209_33	ATCTTCCACCTGAATTGTAGCAGT	down	0.82404	-0.279214	0.898771	0.684955	0.56443	2.05486	0	0	1.69329	0	0	3	0	0	4.5	0	0	middle
686	PC-3p-58175_44	TCATGCTTTGAGATGTTCACC	up	1.13285	0.179959	0.899549	2.18331	2.47337	4.10973	2.44021	0	1.50515	5.91497	0	6	4	0	4	2.5	0	low
687	aof-miR477a_2ss8CT21GT	ACTCTCCTTCAAGGGCTTCCT	up	1.18956	0.250429	0.908963	2.84692	3.38658	0	8.54075	0	10.1597	0	0	0	14	0	27	0	0	middle
688	osa-MIR444d-p5_2ss14CT17CT	TGCCTCAAGCTTGTTGTCTCC	up	1.0399	0.056443	0.910259	37.7051	39.2095	53.084	35.6881	24.3432	43.6492	21.2939	52.6854	77.5	58.5	5	116	9	55	middle
689	osa-MIR444d-p3_2ss14CT17CT	TGCCTCAAGCTTGTTGTCTCC	up	1.0399	0.056443	0.910259	37.7051	39.2095	53.084	35.6881	24.3432	43.6492	21.2939	52.6854	77.5	58.5	5	116	9	55	middle
690	cca-miR396a-5p_R+1	TTCCACAGCTTTCTTGAACTTT	down	0.945993	-0.0800981	0.917233	13.5264	12.7959	3.42477	12.8111	24.3432	11.2886	16.5619	10.5371	5	21	5	30	7	11	middle
691	ath-miR8175_L+2	TCGATCCCCGGCAACGGCGCCA	up	1.08219	0.113957	0.917781	2.04419	2.2122	3.0823	3.05027	0	3.76287	0	2.87375	4.5	5	0	10	0	3	low
692	PC-5p-155490_12	ATTTGGCGTTGGGTGAACAGTAGC	down	0.863533	-0.211677	0.922807	1.01676	0.878002	0	3.05027	0	2.63401	0	0	0	5	0	7	0	0	low
693	PC-5p-114419_18	CTCTCCCTCAAATGCTTCAAA	down	0.863533	-0.211677	0.922807	1.01676	0.878002	0	3.05027	0	2.63401	0	0	0	5	0	7	0	0	low
694	PC-3p-69715_35	AATGAGATTGTGGCACCTAAGATT	down	0.878976	-0.186105	0.93201	0.570796	0.501715	1.71239	0	0	1.50515	0	0	2.5	0	0	4	0	0	low
695	PC-5p-69720_35	AAAATGACAAAATGACAAATGACC	up	1.13082	0.177366	0.935166	1.22011	1.37972	0	3.66032	0	4.13915	0	0	0	6	0	11	0	0	low
696	mtr-MIR2603-p3_2ss9AC17AC	GTCCCTGCCCTTTGTACA	down	0.941556	-0.0868811	0.943514	1.18085	1.11184	1.71239	1.83016	0	0.940716	0	2.39479	2.5	3	0	2.5	0	2.5	low
697	gma-MIR6300-p3_1ss12AG	AGTATAGTGGTGAGTATTCCCG	down	0.941556	-0.0868811	0.943514	1.18085	1.11184	1.71239	1.83016	0	0.940716	0	2.39479	2.5	3	0	2.5	0	2.5	middle
698	PC-5p-31566_90	AAAGCCAGGGATGACTTGCC	down	0.929814	-0.104986	0.951135	2.15835	2.00686	3.42477	3.05027	0	6.02058	0	0	5	5	0	16	0	0	low
699	PC-3p-86039_27	TTCCTGAGTTCCCCACTTTCCT	up	1.04507	0.0635988	0.95659	2.79337	2.91926	4.10973	4.27037	0	3.01029	0	5.7475	6	7	0	8	0	6	low
700	PC-3p-146082_13	CTACTTCCCCCACTTTCCACT	down	0.936058	-0.0953308	0.95837	2.64356	2.47453	0	7.93069	0	2.63401	0	4.78958	0	13	0	7	0	5	low
701	gma-MIR5368-p3_2ss13CT21TA	TCTAACCTTGTGTCAGGACCA	up	1.07731	0.107438	0.960588	1.83016	1.97166	0	5.49048	0	0	5.91497	0	0	9	0	0	2.5	0	low
702	osa-miR168a-3p_L-3R+1_1ss19GC	CCCGCCTTGCACCAACTGAATT	down	0.956165	-0.0646686	0.962371	15.2459	14.5776	8.21946	37.5183	0	27.2808	5.91497	10.5371	12	61.5	0	72.5	2.5	11	middle
703	PC-3p-10250_286	GAAGGTCTTGTCGGAGAGTGA	down	0.945056	-0.0815276	0.963175	11.7158	11.0721	3.42477	31.7228	0	27.4689	0	5.7475	5	52	0	73	0	6	middle
704	cca-miR396a-3p_L-1_1ss12CG	TTCAAGAAAGGTGTGGGAAA	down	0.983553	-0.0239259	0.97173	376.553	370.36	480.153	566.739	82.767	478.26	305.212	327.607	701	929	17	1271	129	342	high
705	bdi-miR164a-3p_L+1R-1_1ss11TA	TCATGTGCCCATCTTCTCCAC	up	1.01391	0.0199282	0.972575	192.232	194.906	243.844	235.481	97.3729	178.36	298.114	108.244	356	386	20	474	126	113	middle
706	osa-miR399j	TGCCAAAGGAGAGTTGCCCTA	up	1.02924	0.0415854	0.973537	13.4389	13.8319	11.6442	28.6725	0	25.2112	0	16.2846	17	47	0	67	0	17	middle
707	gma-MIR5368-p5_2ss9AG23GA	TTTCCTGCGCAGCTTAGGTGGAAGG	down	0.953251	-0.0690724	0.974631	1.11843	1.06615	0	3.35529	0	3.19844	0	0	0	5.5	0	8.5	0	0	low
708	osa-miR5072_L-3	TTCCCCAGCGGAGTCGCCA	up	1.04681	0.0660013	0.975757	1.83016	1.91583	0	5.49048	0	0	0	5.7475	0	9	0	0	0	6	low
709	mtr-MIR2592ay-p5_2ss6AG17CG_1	GAGTCGGGTTGTTTGGGA	up	1.03596	0.0509679	0.977608	1.93184	2.0013	0	5.79551	0	1.69329	0	4.31062	0	9.5	0	4.5	0	4.5	low
710	mtr-MIR2592ay-p5_2ss6AG17CG_2	GAGTCGGGTTGTTTGGGAA	up	1.03596	0.0509679	0.977608	1.93184	2.0013	0	5.79551	0	1.69329	0	4.31062	0	9.5	0	4.5	0	4.5	low
711	PC-3p-14310_205	CTTTGAAAGACCACGTTAGTTT	up	1.01863	0.0266301	0.979458	17.3489	17.6721	18.4938	33.5529	0	22.2009	26.0259	4.78958	27	55	0	59	11	5	middle
712	osa-MIR5083-p5_1ss20GT	AATGGATCCTTCTGAGCCTT	up	1.03002	0.0426783	0.980573	1.93184	1.98984	0	5.79551	0	3.57472	0	2.39479	0	9.5	0	9.5	0	2.5	middle
713	cas-miR11592_L+4R+1_1ss23AC	AACCGAACCGAACCGAACCGAACC	up	1.02802	0.039862	0.985351	1.22011	1.25429	0	3.66032	0	3.76287	0	0	0	6	0	10	0	0	middle
714	PC-5p-60731_42	ATTGGACCCACTTCTTACTAAAAG	up	1.02802	0.039862	0.985351	0.610053	0.627144	0	1.83016	0	1.88143	0	0	0	3	0	5	0	0	low
715	PC-3p-74770_32	AATGTATGTTTGGGGGTAAAAACT	up	1.02802	0.039862	0.985351	1.22011	1.25429	0	3.66032	0	3.76287	0	0	0	6	0	10	0	0	low
716	aof-miR164_R-2	TGGAGAAGCAGGGCACGTG	up	1.0084	0.0120658	0.991379	6.62665	6.6823	11.6442	8.23572	0	9.03088	0	11.016	17	13.5	0	24	0	11.5	middle
717	PC-5p-188038_8	AATGTTAAAATTGTTGTCGAGGCC	down	0.986895	-0.0190317	0.993004	1.01676	1.00343	0	3.05027	0	3.01029	0	0	0	5	0	8	0	0	low
718	osa-miR168a-3p_L-3_1ss19GC	CCCGCCTTGCACCAACTGAAT	down	0.994974	-0.00726941	0.993667	633.588	630.404	451.385	1278.98	170.403	944.855	457.818	488.537	659	2096.5	35	2511	193.5	510	high
719	gma-MIR9726-p5_2ss2AT18TC	TTTAGGCATTATTTTTTCC	up	1.0042	0.00605108	0.996857	59.252	59.501	19.1787	17.3865	141.191	18.6262	145.508	14.3687	28	28.5	29	49.5	61.5	15	middle

## Sheet: DE miRNAs in root
Table S7 Differential expression miRNAs identified in H. fulva under NaCl treatment
red is pvalue<0.001,orange is pvalue <0.01,blue is pvalue<0.05,green is pvalue <0.1.
Index	miR_name	miR_seq	up/down	fold_change(NaCl_root(mean)/NT_root(mean))	log2(fold_change)	pvalue(t_test)	NT_root(mean)	NaCl_root(mean)	NT_root/NT_root1(norm)	NT_root/NT_root2(norm)	NT_root/NT_root3(norm)	NaCl_root/NaCl_root1(norm)	NaCl_root/NaCl_root2(norm)	NaCl_root/NaCl_root3(norm)	NT_root/NT_root1(raw)	NT_root/NT_root2(raw)	NT_root/NT_root3(raw)	NaCl_root/NaCl_root1(raw)	NaCl_root/NaCl_root2(raw)	NaCl_root/NaCl_root3(raw)	Expression level
1	PC-5p-1255_2277	AAAACTAACTCGGTCTTTCGAAGG	down	0.170561	-2.55164	0.000741342	251.132	42.8335	277.316	239.767	236.313	40.7033	55.7434	32.0538	507	700	207	9	79	24	high
2	PC-3p-82176_28	CATGTATGTAGGGTGAGATATA	down	-inf	-inf	0.00428915	6.5564	0	7.11068	6.85048	5.70805	0	0	0	13	20	5	0	0	0	low
3	aof-miR171c	TTGAGCCGCGTCAATATCTCC	up	2.23539	1.16053	0.0053092	199.705	446.419	246.959	216.304	135.852	402.51	476.641	460.105	451.5	631.5	119	89	675.5	344.5	high
4	PC-3p-78504_30	TAAATGATTAGGTTGTAAACG	down	0.120065	-3.05811	0.00794333	18.5395	2.22596	20.5116	21.4078	13.6993	0	0	6.67787	37.5	62.5	12	0	0	5	middle
5	aof-MIR396b-p3_2ss16AG18GA	TGTGGGAAATTACAGGGAGAG	down	0.132999	-2.91051	0.00965868	15.9162	2.11684	16.4093	17.64	13.6993	0	6.35051	0	30	51.5	12	0	9	0	middle
6	PC-3p-10906_268	TCTCTAGCCATAAGCTTATGT	down	0.111896	-3.15977	0.01193	128.221	14.3474	114.318	103.1	167.246	0	43.0423	0	209	301	146.5	0	61	0	middle
7	osa-MIR5076-p3_2ss16GC17TC	TGTAAGAAGAGTAGACCTTGA	down	0.133174	-2.90862	0.0175622	12.363	1.64643	8.20463	14.0435	14.8409	0	4.93928	0	15	41	13	0	7	0	middle
8	aof-miR396b_L-1R-1	TCCACAGCTTTCTTGAACT	up	3.63979	1.86385	0.0183124	13.1191	47.7506	9.84555	8.39184	21.1198	54.271	34.2222	54.7585	18	24.5	18.5	12	48.5	41	middle
9	aof-MIR159-p3_1ss9TA	AGCTGCTTAGTCATGGATTC	down	0.150334	-2.73375	0.0193205	2395.5	360.125	1772.2	2643.6	2770.69	483.917	338.694	257.766	3240	7718	2427	107	480	193	high
10	aof-miR166a	TCTCGGACCAGGCTTCATTCC	down	0.3598	-1.47473	0.023476	3270.07	1176.57	3830.47	2395.1	3584.66	1659.79	1061.24	808.69	7003	6992.5	3140	367	1504	605.5	high
11	aof-miR319b_2ss20CT21TC	TTTGGACTGAAGGGAGCTCTC	up	3.11526	1.63935	0.0262499	129.425	403.192	209.765	160.815	17.695	305.275	494.281	410.021	383.5	469.5	15.5	67.5	700.5	307	high
12	aof-miR166a_L-2R+2_1ss4CN	TNGGACCAGGCTTCATTCCCC	down	0.146652	-2.76953	0.0274312	33.6225	4.9308	41.8436	21.9215	37.1023	0	8.11454	6.67787	76.5	64	32.5	0	11.5	5	middle
13	PC-3p-80725_29	ACCCAATGATCACTAAAAGACAAA	down	-inf	-inf	0.0290568	4.25256	0	3.28185	3.76777	5.70805	0	0	0	6	11	5	0	0	0	low
14	osa-MIR171g-p5_2ss5GA21TG_2	CATGATATTGACTTGGCTCAGC	down	0.335806	-1.5743	0.0305933	585.775	196.707	580.067	724.61	452.648	203.516	154.882	231.722	1060.5	2115.5	396.5	45	219.5	173.5	high
15	osa-MIR171g-p5_2ss5GA21TG_1	CATGATATTGACTTGGCTCAG	down	0.335806	-1.5743	0.0305933	585.775	196.707	580.067	724.61	452.648	203.516	154.882	231.722	1060.5	2115.5	396.5	45	219.5	173.5	high
16	osa-miR166b-5p_R+1_2ss11CT19GA	GGAATGTTGTTTGGCTCGAGGT	down	-inf	-inf	0.0391807	10.0778	0	10.9395	6.16543	13.1285	0	0	0	20	18	11.5	0	0	0	middle
17	PC-3p-66390_37	AATGAGATTGTGACACCTAAGATT	down	-inf	-inf	0.0420553	4.09236	0	3.82883	2.74019	5.70805	0	0	0	7	8	5	0	0	0	low
18	PC-5p-11294_259	TGGGATTGTCTTTTAGTGGTG	down	-inf	-inf	0.0423855	2.80331	0	2.1879	2.22641	3.99563	0	0	0	4	6.5	3.5	0	0	0	middle
19	ptc-MIR166e-p5_2ss19TA21TC	GATTGTCGTCTGGTTCGAAGC	down	0.144535	-2.79051	0.0447674	4.88193	0.705612	7.11068	4.11029	3.42483	0	2.11684	0	13	12	3	0	3	0	middle
20	PC-3p-4499_652	TGCTCACTGCTCTTCTCGTCAGC	down	0.271268	-1.88221	0.049512	86.9763	23.5939	116.506	80.4932	63.9302	27.1355	16.9347	26.7115	213	235	56	6	24	20	middle
Following miRNAs do not show significant difference (p-value<0.05).
21	aof-miR156a	TGACAGAAGAGAGTGAGCAC	up	2.80554	1.48828	0.051676	936.316	2626.88	1090.12	1101.21	617.611	2503.25	3463.5	1913.88	1993	3215	541	553.5	4908.5	1433	high
22	cpa-miR156a	TGACAGAAGAGAGTGAGCAC	up	2.80554	1.48828	0.051676	936.316	2626.88	1090.12	1101.21	617.611	2503.25	3463.5	1913.88	1993	3215	541	553.5	4908.5	1433	high
23	PC-5p-27960_102	TTGTGTATGGCCCGGCCCATC	down	-inf	-inf	0.0526245	2.71215	0	1.91441	2.22641	3.99563	0	0	0	3.5	6.5	3.5	0	0	0	low
24	PC-3p-11056_265	TGAGAATTCAAAGAGTGAGGA	down	0.220155	-2.18341	0.052875	7.47849	1.64643	5.19626	7.53553	9.70368	0	4.93928	0	9.5	22	8.5	0	7	0	middle
25	PC-3p-61451_41	AAGTTTGGGGTAAATTTTGAGGTA	down	-inf	-inf	0.0555501	2.35374	0	3.00836	1.19883	2.85402	0	0	0	5.5	3.5	2.5	0	0	0	low
26	ptc-miR156g	TTGACAGAAGATAGAGAGCAC	up	6.91068	2.78883	0.0589135	89.8049	620.613	60.7142	118.513	90.1872	447.736	891.894	522.209	111	346	79	99	1264	391	high
27	ata-miR160b-3p_2ss8CT21AC	GCGTGCATGGATCCAAGCATC	down	0.156482	-2.67593	0.0601957	23.2434	3.63718	13.6744	22.9491	33.1067	0	4.23367	6.67787	25	67	29	0	6	5	middle
28	PC-5p-1572_1829	TAGGGTCTGGAACATGGTATCGGA	down	0.0718732	-3.7984	0.0613273	271.299	19.4991	403.121	207.57	203.207	22.6129	9.17296	26.7115	737	606	178	5	13	20	middle
29	ath-miR845a_R+1	CGGCTCTGATACCAATTGATGG	down	-inf	-inf	0.0630636	8.09266	0	8.7516	4.11029	11.4161	0	0	0	16	12	10	0	0	0	middle
30	aof-miR164	TGGAGAAGCAGGGCACGTGCA	up	2.46843	1.30359	0.0636927	312.189	770.617	465.202	431.409	39.9563	547.233	927.88	836.737	850.5	1259.5	35	121	1315	626.5	high
31	PC-5p-14227_206	ATGTGCTTCGGAAAATGTGCC	down	0.22815	-2.13194	0.0669897	23.7111	5.40969	20.7851	26.3744	23.9738	0	16.2291	0	38	77	21	0	23	0	middle
32	aof-miR394	TTGGCATTCTGTCCACCTCC	up	3.89627	1.96209	0.0686176	76.732	298.968	45.1255	129.132	55.9389	187.687	424.073	285.145	82.5	377	49	41.5	601	213.5	middle
33	PC-3p-46867_57	TTTTGAACCCCAAGACTCGCT	down	-inf	-inf	0.0687324	4.19635	0	1.91441	4.9666	5.70805	0	0	0	3.5	14.5	5	0	0	0	middle
34	aof-MIR166c-p3	AAGGGGAATGTTGTCTGGCTC	down	0.299738	-1.73823	0.0762928	15.0072	4.49822	21.332	9.41941	14.2701	0	8.82015	4.67451	39	27.5	12.5	0	12.5	3.5	high
35	aof-MIR166c-p5	AAGGGGAATGTTGTCTGGCTC	down	0.299738	-1.73823	0.0762928	15.0072	4.49822	21.332	9.41941	14.2701	0	8.82015	4.67451	39	27.5	12.5	0	12.5	3.5	high
36	ath-miR827_1ss8AG	TTAGATGGCCATCAACAAACT	down	0.123094	-3.02216	0.0789971	17.1969	2.11684	18.5972	7.87805	25.1154	0	6.35051	0	34	23	22	0	9	0	middle
37	PC-3p-93541_24	AATGAGATTGGGACACCTAAGATT	down	-inf	-inf	0.0799577	5.15617	0	6.5637	2.05514	6.84966	0	0	0	12	6	6	0	0	0	low
38	PC-5p-5335_555	TTTATTTCTTATGGATTGTCAGT	down	0.268692	-1.89597	0.0833061	49.5981	13.3266	72.4742	28.9433	47.3768	0	23.2852	16.6947	132.5	84.5	41.5	0	33	12.5	middle
39	PC-3p-40989_67	TTTTGAAAAACCGTGGGTAATT	down	-inf	-inf	0.0886803	2.57014	0	3.82883	1.02757	2.85402	0	0	0	7	3	2.5	0	0	0	low
40	PC-5p-24200_119	CAACGTGGCTCGATTTGAACCA	down	-inf	-inf	0.0940254	15.7657	0	7.11068	15.0711	25.1154	0	0	0	13	44	22	0	0	0	middle
41	cme-MIR1863-p5_2ss10TG18GA	CAGACAACGGGGGTTTGA	up	inf	inf	0.0948186	0	22.9342	0	0	0	31.6581	7.76173	29.3826	0	0	0	7	11	22	middle
42	aof-miR164_1ss20CA	TGGAGAAGCAGGGCACGTGAA	up	3.83052	1.93754	0.0948489	39.8664	152.709	75.7561	43.8431	0	79.1453	155.94	223.041	138.5	128	0	17.5	221	167	high
43	PC-3p-123088_16	TTAAAATGAAGCCGCTATTAGC	down	-inf	-inf	0.0951084	5.53047	0	4.3758	3.08272	9.13288	0	0	0	8	9	8	0	0	0	low
44	aof-miR408_R+1	TGCACTGCCTCTTCCCTGGCTT	up	22.9426	4.51996	0.0952922	4.11604	94.4328	8.7516	3.5965	0	33.9194	123.835	125.544	16	10.5	0	7.5	175.5	94	middle
45	aof-MIR159-p5_2ss10GC21AC	GAGCTCCTTCAAGTCCAAATC	down	-inf	-inf	0.0957973	11.8329	0	4.10231	17.1262	14.2701	0	0	0	7.5	50	12.5	0	0	0	middle
46	mtr-MIR166f-p5_1ss6GT	AATGATGTTTGTTCCAAGATC	down	-inf	-inf	0.0960437	14.0771	0	5.46975	15.0711	21.6906	0	0	0	10	44	19	0	0	0	middle
47	mtr-miR319a-3p_L+1	CTTGGACTGAAGGGAGCTCCC	down	0.313803	-1.67207	0.096273	126.636	39.7389	63.7226	146.087	170.1	31.6581	76.2061	11.3524	116.5	426.5	149	7	108	8.5	middle
48	tae-miR171b_L-1R+1_1ss21GT	TGAGCCGTGCCAATATCACTC	up	2.04886	1.03482	0.101829	30.2693	62.0176	48.6808	14.7285	27.3986	58.7936	44.4536	82.8056	89	43	24	13	63	62	middle
49	PC-3p-27099_106	AATGAGATTGTGACACATAAGGTT	down	-inf	-inf	0.102631	5.74048	0	9.57207	4.79534	2.85402	0	0	0	17.5	14	2.5	0	0	0	low
50	PC-5p-20316_144	AACTTTGGTACTACTAGACTCAAG	down	0.016798	-5.89556	0.103723	35.0047	0.58801	42.3906	51.2074	11.4161	0	1.76403	0	77.5	149.5	10	0	2.5	0	middle
51	PC-3p-14310_205	CTTTGAAAGACCACGTTAGTTT	down	0.17458	-2.51804	0.107104	12.1253	2.11684	11.4865	19.1813	5.70805	0	6.35051	0	21	56	5	0	9	0	middle
52	PC-3p-6389_465	TCTTTGCCCTTGGTACAATTTC	down	0.285148	-1.81022	0.112492	3.71182	1.05842	3.82883	2.74019	4.56644	0	3.17525	0	7	8	4	0	4.5	0	middle
53	PC-5p-16373_179	AAACTATTTGAGGCTTATACCATT	down	0.12299	-3.02338	0.112718	46.3338	5.69861	45.6724	19.6951	73.6338	13.5678	3.52806	0	83.5	57.5	64.5	3	5	0	middle
54	aof-miR166a_L-1R+1	CTCGGACCAGGCTTCATTCCC	down	0.284586	-1.81306	0.112735	54.8416	15.6071	86.1486	37.8489	40.5272	0	20.1099	26.7115	157.5	110.5	35.5	0	28.5	20	middle
55	ata-miR172c-5p_R-2_1ss7TC	GTGGCACCATCAAGATTCACA	down	0.0447972	-4.48045	0.113394	187.51	8.39995	184.878	73.9852	303.668	0	9.17296	16.0269	338	216	266	0	13	12	middle
56	aof-miR167c	TGAAGCTGCCAGCATGATCTG	up	2.23785	1.16211	0.114412	185.332	414.746	135.65	56.174	364.174	461.304	316.82	466.115	248	164	319	102	449	349	high
57	osa-miR156a_L+1	CTGACAGAAGAGAGTGAGCAC	up	3.4676	1.79394	0.115275	27.102	93.979	25.7078	15.0711	40.5272	115.326	124.541	42.0706	47	44	35.5	25.5	176.5	31.5	middle
58	aof-miR166a_1ss21CA	TCTCGGACCAGGCTTCATTCA	down	0.283706	-1.81753	0.115768	19.897	5.6449	16.1358	22.4353	21.1198	0	16.9347	0	29.5	65.5	18.5	0	24	0	middle
59	osa-miR166b-5p_1ss19GT	GGAATGTTGTCTGGCTCGTGG	down	0.16874	-2.56713	0.115822	38.1322	6.43441	47.0399	13.701	53.6557	0	11.2898	8.01344	86	40	47	0	16	6	middle
60	PC-3p-159907_11	CAAAGACTACTACAATTCAGGTGG	down	-inf	-inf	0.121727	1.97402	0	1.64093	0.85631	3.42483	0	0	0	3	2.5	3	0	0	0	low
61	aof-miR167c_R+1_2	TGAAGCTGCCAGCATGATCTGG	up	2.66686	1.41514	0.122651	9.91702	26.4473	6.29021	6.3367	17.1241	33.9194	12.701	32.7216	11.5	18.5	15	7.5	18	24.5	middle
62	aof-miR167c_R+1_1	TGAAGCTGCCAGCATGATCTGC	up	2.66686	1.41514	0.122651	9.91702	26.4473	6.29021	6.3367	17.1241	33.9194	12.701	32.7216	11.5	18.5	15	7.5	18	24.5	middle
63	PC-5p-53633_49	ACTTTCGTACTACAAGACTCAAGA	down	-inf	-inf	0.123272	7.21905	0	6.01673	3.08272	12.5577	0	0	0	11	9	11	0	0	0	middle
64	osa-miR166d-5p	GGAATGTTGTCTGGCTCGAGG	down	0.0779309	-3.68166	0.124784	649.7	50.6317	336.116	505.052	1107.93	58.7936	55.0377	38.0639	614.5	1474.5	970.5	13	78	28.5	high
65	aof-miR479_R-1_1ss8AG	TGAGCCGGACCAATATCACT	down	0.232615	-2.10399	0.127962	82.134	19.1056	67.2779	45.5557	133.568	38.442	9.52576	9.34902	123	133	117	8.5	13.5	7	middle
66	aof-miR396b_1ss21GA	TTCCACAGCTTTCTTGAACTA	up	3.4769	1.7978	0.12911	2902.5	10091.7	4927.97	2879.94	899.589	4656	15175.6	10443.5	9009.5	8408	788	1029.5	21507	7819.5	high
67	PC-5p-1249_2289	GTGATTTTGGTATGGCTCATT	down	0.00850952	-6.87671	0.132721	179.661	1.52883	198.005	294.742	46.2352	0	4.58648	0	362	860.5	40.5	0	6.5	0	middle
68	osa-MIR2118e-p3_2ss13TA19CT	GAAAAGAGAGTCAAAGAGT	down	-inf	-inf	0.137383	3.15772	0	1.36744	2.39767	5.70805	0	0	0	2.5	7	5	0	0	0	low
69	osa-miR528-5p_1ss16GA	TGGAAGGGGCATGCAAAGGAG	up	25.9321	4.69666	0.141614	1.71085	44.3658	2.73488	2.39767	0	11.3065	48.3344	73.4566	5	7	0	2.5	68.5	55	middle
70	aof-miR408	TGCACTGCCTCTTCCCTGGCT	up	18.8545	4.23684	0.141908	4.64088	87.5015	9.29858	4.62408	0	18.0903	112.192	132.222	17	13.5	0	4	159	99	middle
71	PC-5p-73209_33	ATCTTCCACCTGAATTGTAGCAGT	down	-inf	-inf	0.14835	6.72033	0	6.29021	1.88388	11.9869	0	0	0	11.5	5.5	10.5	0	0	0	middle
72	gra-miR167a_L-2R+2	AGATCATCTTGCAGCTTCAAT	down	-inf	-inf	0.149986	5.30803	0	1.36744	9.41941	5.13724	0	0	0	2.5	27.5	4.5	0	0	0	middle
73	PC-3p-60945_42	CTTTAAAAAATCGAGTTAGTT	down	-inf	-inf	0.151421	5.7707	0	3.55534	2.91145	10.8453	0	0	0	6.5	8.5	9.5	0	0	0	middle
74	PC-3p-57840_44	TCAAGACTAAGACTCGGTCTT	up	12.9204	3.69157	0.152281	0.832412	10.7551	1.64093	0.85631	0	18.0903	2.82245	11.3524	3	2.5	0	4	4	8.5	middle
75	PC-3p-8907_330	CATGTGCCCATCTTTTCCACC	down	0.667546	-0.583062	0.152921	44.5546	29.7423	56.8854	43.6718	33.1067	36.1807	30.3413	22.7048	104	127.5	29	8	43	17	middle
76	gma-MIR159a-p3_1ss17GC	TGAAGTGGAGCTCCTTCAAGTC	down	-inf	-inf	0.155241	4.67993	0	1.36744	4.11029	8.56207	0	0	0	2.5	12	7.5	0	0	0	low
77	osa-miR396a-3p_R+1_1ss10AC	GTTCAATAACGCTGTGGGAAA	down	0.296451	-1.75413	0.156122	49.6578	14.7211	27.8957	81.692	39.3855	0	32.811	11.3524	51	238.5	34.5	0	46.5	8.5	middle
78	osa-miR162a	TCGATAAACCTCTGCATCCAG	down	0.431133	-1.21379	0.157401	1219.19	525.632	944.079	851.515	1861.97	585.675	633.287	357.934	1726	2486	1631	129.5	897.5	268	high
79	PC-3p-6716_443	GAAGGTCTTGATTGAGAGTGG	down	0.0744449	-3.74768	0.164559	44.2321	3.29286	7.11068	71.9301	53.6557	0	9.87857	0	13	210	47	0	14	0	middle
80	ptc-miR6478_R+2_1ss21GA	CCGACCTTAGCTCAGTTGGTAGA	down	0.452931	-1.14264	0.165052	110.887	50.2244	136.47	52.92	143.272	58.7936	57.1546	34.7249	249.5	154.5	125.5	13	81	26	middle
81	PC-5p-60731_42	ATTGGACCCACTTCTTACTAAAAG	down	-inf	-inf	0.176607	3.18779	0	1.91441	1.3701	6.27885	0	0	0	3.5	4	5.5	0	0	0	low
82	osa-miR166h-5p_2ss5TC8TC	GGAACGTCGGCTGGCTCGAGG	down	0.267078	-1.90467	0.177397	12.3292	3.29286	13.1274	4.45281	19.4074	0	9.87857	0	24	13	17	0	14	0	middle
83	aof-miR827_1ss8AG	TTAGATGGCCATCAACAAACA	down	0.444437	-1.16995	0.177477	153.662	68.293	77.6705	165.268	218.048	126.632	58.213	20.0336	142	482.5	191	28	82.5	15	high
84	aof-miR167b	TGAAGCTGCCAGCATGATCTGA	up	2.24953	1.16963	0.177781	2162.6	4864.84	4866.71	893.303	727.776	4332.64	3793.02	6468.85	8897.5	2608	637.5	958	5375.5	4843.5	high
85	osa-miR396a-3p	GTTCAATAAAGCTGTGGGAA	down	0.390126	-1.35799	0.178164	58.3214	22.7527	36.6473	90.9401	47.3768	49.7484	15.1707	3.33893	67	265.5	41.5	11	21.5	2.5	middle
86	vca-miR167a-3p_L-1R+1_1ss11GT	AGATCATGTTGCAGTTTCATC	down	0.312756	-1.67689	0.178534	24.1722	7.56	30.9041	7.36427	34.2483	0	11.9954	10.6846	56.5	21.5	30	0	17	8	middle
87	vca-miR167b-3p	AGATCATGTTGCAGTTTCATC	down	0.312756	-1.67689	0.178534	24.1722	7.56	30.9041	7.36427	34.2483	0	11.9954	10.6846	56.5	21.5	30	0	17	8	middle
88	PC-5p-74134_32	ATGAGAAAATAACAATAATGGAGT	down	-inf	-inf	0.183504	1.82502	0	2.73488	2.74019	0	0	0	0	5	8	0	0	0	0	middle
89	PC-3p-127971_15	CAGGCGTTGCTTTGAGAACTGG	down	-inf	-inf	0.183646	4.65345	0	7.11068	0	6.84966	0	0	0	13	0	6	0	0	0	low
90	aof-miR172_L-1	GAATCTTGATGATGCTGCAT	down	-inf	-inf	0.183902	3.76422	0	5.46975	5.82291	0	0	0	0	10	17	0	0	0	0	low
91	PC-5p-25091_115	TAGGGTCTTTTACATGGTAC	down	-inf	-inf	0.183903	2.12152	0	3.28185	3.08272	0	0	0	0	6	9	0	0	0	0	middle
92	PC-5p-32386_87	CAAAGCGTCAACAAGAAGATC	down	-inf	-inf	0.183903	2.12152	0	3.28185	3.08272	0	0	0	0	6	9	0	0	0	0	middle
93	ptc-MIR156j-p3	GCTCTCTATGCTTCTGTCATC	up	inf	inf	0.18413	0	10.2816	0	0	0	0	14.8179	16.0269	0	0	0	0	21	12	middle
94	aof-miR160b_L+1R-1	GTGCCTGGTTCCCTGTATGCC	down	-inf	-inf	0.18496	4.12887	0	6.5637	5.82291	0	0	0	0	12	17	0	0	0	0	low
95	aof-MIR408-p3_2ss18GT19GT	TGCACTGCCTCTTCCCTTT	up	inf	inf	0.185066	0	3.3222	0	0	0	0	5.29209	4.67451	0	0	0	0	7.5	3.5	low
96	aof-MIR408-p5_2ss18GT19GT	TGCACTGCCTCTTCCCTTT	up	inf	inf	0.185066	0	3.3222	0	0	0	0	5.29209	4.67451	0	0	0	0	7.5	3.5	low
97	osa-miR166d-5p_R+1_1ss19AT	GGAATGTTGTCTGGCTCGTGGT	down	-inf	-inf	0.185222	6.97073	0	13.9479	4.11029	2.85402	0	0	0	25.5	12	2.5	0	0	0	middle
98	PC-3p-86650_26	ATGATGTATGAATGAATAACCTCC	down	-inf	-inf	0.185248	4.072	0	0	6.50796	5.70805	0	0	0	0	19	5	0	0	0	low
99	PC-5p-114899_18	ATACCTCAAAATTTACCTCAAACT	down	-inf	-inf	0.18526	1.71085	0	2.73488	2.39767	0	0	0	0	5	7	0	0	0	0	low
100	osa-miR528-5p	TGGAAGGGGCATGCAGAGGAG	up	17.9045	4.16225	0.188565	82.7723	1482	164.913	76.5541	6.84966	492.962	1084.88	2868.14	301.5	223.5	6	109	1537.5	2147.5	high
101	gma-miR6300_1ss2TN	GNCGTTGTAGTATAGTGG	down	-inf	-inf	0.188583	2.87472	0	3.82883	4.79534	0	0	0	0	7	14	0	0	0	0	low
102	mes-miR171l_2ss9AG21CT	CGAGCCGAGCCAATATCACTT	up	3.55728	1.83078	0.188649	29.3133	104.276	43.758	13.3584	30.8235	27.1355	134.772	150.92	80	39	27	6	191	113	middle
103	PC-3p-69715_35	AATGAGATTGTGGCACCTAAGATT	down	-inf	-inf	0.189504	2.60021	0	4.3758	0	3.42483	0	0	0	8	0	3	0	0	0	low
104	PC-5p-77985_30	TTGCCTAAAAATCGCGCTCGAT	down	-inf	-inf	0.189663	3.38695	0	0	4.45281	5.70805	0	0	0	0	13	5	0	0	0	low
105	gma-MIR6300-p3_1ss16AG	TTGTAGTATAGTGGTGAG	down	-inf	-inf	0.190211	2.35945	0	0	3.08272	3.99563	0	0	0	0	9	3.5	0	0	0	low
106	aof-MIR396b-p5_2ss21GT22AT	TATTTTTCCACAGCTTTCTTTT	down	-inf	-inf	0.190534	2.2634	0	1.36744	0.85631	4.56644	0	0	0	2.5	2.5	4	0	0	0	low
107	ssp-MIR169-p3_2ss13GC17AC	CCCCGTCCGGCCCGGACC	down	-inf	-inf	0.19062	1.44842	0	2.46139	1.88388	0	0	0	0	4.5	5.5	0	0	0	0	low
108	PC-5p-100416_22	TGGACTCCAATTGGCACAAAC	down	-inf	-inf	0.191602	1.59667	0	2.73488	2.05514	0	0	0	0	5	6	0	0	0	0	low
109	PC-3p-75346_32	TGTTAAGGAGAGGCCGCAGCT	down	-inf	-inf	0.193221	1.89317	0	3.28185	2.39767	0	0	0	0	6	7	0	0	0	0	low
110	PC-3p-74770_32	AATGTATGTTTGGGGGTAAAAACT	down	-inf	-inf	0.193613	2.16755	0	2.73488	3.76777	0	0	0	0	5	11	0	0	0	0	low
111	PC-5p-1745_1642	TGCAAACGCCTTAATTCGTCA	up	1.9696	0.977905	0.195594	19.9583	39.31	22.426	34.5949	2.85402	36.1807	55.0377	26.7115	41	101	2.5	8	78	20	middle
112	aof-miR168b_R-1_1ss20TA	TCGCTTGGTGCAGGTCGGGA	down	0.750294	-0.414472	0.19617	123.54	92.6914	92.1653	136.325	142.13	74.6227	89.2599	114.192	168.5	398	124.5	16.5	126.5	85.5	high
113	PC-3p-25301_114	AATGCATTGATGTGTGTGGGGTCC	down	-inf	-inf	0.196332	8.34802	0	14.7683	10.2757	0	0	0	0	27	30	0	0	0	0	middle
114	PC-3p-48841_54	AATGAGATTGTACCACCTAAGATT	down	-inf	-inf	0.199503	1.14086	0	1.36744	2.05514	0	0	0	0	2.5	6	0	0	0	0	low
115	osa-miR397a	TCATTGAGTGCAGCGTTGATG	down	-inf	-inf	0.2001	3.1586	0	0	3.76777	5.70805	0	0	0	0	11	5	0	0	0	middle
116	aof-miR172	AGAATCTTGATGATGCTGCAT	up	1.69322	0.759766	0.200717	356.431	603.514	612.612	297.996	158.684	619.594	528.503	662.445	1120	870	139	137	749	496	high
117	mtr-MIR2592ay-p5_2ss6AG17CG_1	GAGTCGGGTTGTTTGGGA	down	-inf	-inf	0.200888	4.15277	0	4.92278	7.53553	0	0	0	0	9	22	0	0	0	0	low
118	mtr-MIR2592ay-p5_2ss6AG17CG_2	GAGTCGGGTTGTTTGGGAA	down	-inf	-inf	0.200888	4.15277	0	4.92278	7.53553	0	0	0	0	9	22	0	0	0	0	low
119	PC-3p-10789_271	TCTCCTCTGTATTCCTCCTCC	up	inf	inf	0.201246	0	4.77538	0	0	0	0	5.6449	8.68123	0	0	0	0	8	6.5	middle
120	PC-5p-186684_8	CCTCGACATTAGCATGGCCATT	down	-inf	-inf	0.202637	3.74182	0	4.3758	0	6.84966	0	0	0	8	0	6	0	0	0	low
121	aof-miR166b_R-1	TCTCGGACCAGGCTTCATTC	down	0.288335	-1.79418	0.203747	8.34655	2.4066	4.3758	5.82291	14.8409	0	3.88087	3.33893	8	17	13	0	5.5	2.5	middle
122	ptc-miR172h-5p_1ss2GT	GTAGCACCATCAAGATTCACA	down	0.172463	-2.53564	0.20405	182.509	31.4761	328.732	46.412	172.383	49.7484	29.9885	14.6913	601	135.5	151	11	42.5	11	middle
123	PC-3p-86869_26	ATTCGTCAGACGGAAAGTGAAGTT	down	-inf	-inf	0.204253	0.889499	0	1.64093	1.02757	0	0	0	0	3	3	0	0	0	0	low
124	PC-5p-80590_29	AAAAGAGATCTGAGGTTCAATGCC	down	-inf	-inf	0.204253	1.4825	0	2.73488	1.71262	0	0	0	0	5	5	0	0	0	0	low
125	PC-5p-69720_35	AAAATGACAAAATGACAAATGACC	down	-inf	-inf	0.204253	2.6685	0	4.92278	3.08272	0	0	0	0	9	9	0	0	0	0	low
126	aof-miR166c_L+2R-2	TCTCGGACCAGGCTTCATCCC	down	0.479666	-1.0599	0.204887	21.0497	10.0968	28.4427	11.3033	23.403	0	16.9347	13.3557	52	33	20.5	0	24	10	middle
127	PC-3p-49379_54	AGCGTTCGGACGGCACATTATGTG	down	-inf	-inf	0.206687	3.85627	0	4.3758	7.19301	0	0	0	0	8	21	0	0	0	0	low
128	PC-3p-38309_72	CTGACAATCCATAAGAAATAAAGC	down	-inf	-inf	0.207871	3.04443	0	0	3.42524	5.70805	0	0	0	0	10	5	0	0	0	middle
129	osa-miR528-5p_1ss21GA	TGGAAGGGGCATGCAGAGGAA	up	inf	inf	0.208712	0	2.83918	0	0	0	0	3.17525	5.3423	0	0	0	0	4.5	4	middle
130	PC-3p-75283_32	AAAATGATCAGATGGTACAACATG	down	-inf	-inf	0.211215	1.87016	0	3.55534	2.05514	0	0	0	0	6.5	6	0	0	0	0	low
131	mtr-MIR319b-p5_1ss2GT	ATCTGCTGACTCATTCATCCA	down	-inf	-inf	0.211324	11.436	0	0	21.7503	12.5577	0	0	0	0	63.5	11	0	0	0	middle
132	PC-3p-76486_31	AATGAGATTGAGCCACCTAAGATT	down	-inf	-inf	0.211854	3.44382	0	6.5637	3.76777	0	0	0	0	12	11	0	0	0	0	low
133	mtr-MIR169a-p3_2ss7GA20TC	CAAGTTATCCTTGGCTATGCT	down	0.0779941	-3.68049	0.212399	24.1253	1.88163	2.73488	23.9767	45.6644	0	5.6449	0	5	70	40	0	8	0	middle
134	aof-MIR166b-p5_2ss6GC17TG	AAGAACGAAAGTTGGGGG	down	-inf	-inf	0.212454	3.76511	0	4.10231	7.19301	0	0	0	0	7.5	21	0	0	0	0	low
135	aof-MIR166b-p3_2ss6GC17TG	AAGAACGAAAGTTGGGGG	down	-inf	-inf	0.212454	3.76511	0	4.10231	7.19301	0	0	0	0	7.5	21	0	0	0	0	low
136	osa-miR166l-5p_2ss1GA18AG	AGATTGTTGTCTGGTTCGAGG	down	-inf	-inf	0.213561	2.85082	0	5.46975	3.08272	0	0	0	0	10	9	0	0	0	0	middle
137	PC-5p-4876_604	GAGAAAATAACAGATGTAAAGAGG	down	0.281371	-1.82946	0.214032	24.2086	6.81158	15.3153	13.3584	43.952	13.5678	3.52806	3.33893	28	39	38.5	3	5	2.5	middle
138	osa-miR168a-3p_L-3R+1_1ss19GC	CCCGCCTTGCACCAACTGAATT	down	0.0752534	-3.7321	0.216393	35.1054	2.6418	34.1859	67.1347	3.99563	0	4.58648	3.33893	62.5	196	3.5	0	6.5	2.5	middle
139	PC-5p-135984_14	AAGGATTTCCAATCACATGTATGC	down	-inf	-inf	0.217647	2.93026	0	0	3.08272	5.70805	0	0	0	0	9	5	0	0	0	low
140	vca-miR168b-3p_2ss3CT12CT	CCTGCCTTGCATCAACTGAAT	down	0.440732	-1.18203	0.218058	1029.18	453.59	1267.34	1441.17	379.015	303.013	560.256	497.501	2317	4207.5	332	67	794	372.5	high
141	PC-5p-135317_14	ATTTCTATGTGGAATTCAATTGTA	down	-inf	-inf	0.220431	4.64274	0	0	4.79534	9.13288	0	0	0	0	14	8	0	0	0	low
142	PC-3p-55402_47	TTTTCTATTATTGGGCTGGTC	down	-inf	-inf	0.221047	1.66482	0	3.28185	1.71262	0	0	0	0	6	5	0	0	0	0	low
143	PC-5p-74276_32	ATTATAAATGCATTGGAGCTCACT	down	-inf	-inf	0.221047	3.32965	0	6.5637	3.42524	0	0	0	0	12	10	0	0	0	0	low
144	PC-3p-72548_33	AATGATCACTAAAAGACAAACCCC	down	-inf	-inf	0.223489	7.98977	0	2.73488	4.11029	17.1241	0	0	0	5	12	15	0	0	0	middle
145	PC-3p-112236_19	AATAAGATTGCGCCACCTAAGATT	down	-inf	-inf	0.225203	2.73665	0	5.46975	2.74019	0	0	0	0	10	8	0	0	0	0	low
146	bdi-MIR172a-p3_2ss8AG17TA	GATTCACGTCGGGTTCACCA	down	0.514735	-0.958099	0.228526	7.82502	4.02781	4.92278	9.41941	9.13288	0	7.40893	4.67451	9	27.5	8	0	10.5	3.5	middle
147	bdi-MIR172a-p5_2ss8AG17TA	GATTCACGTCGGGTTCACCA	down	0.514735	-0.958099	0.228526	7.82502	4.02781	4.92278	9.41941	9.13288	0	7.40893	4.67451	9	27.5	8	0	10.5	3.5	middle
148	PC-3p-198526_8	TCTGAACTCCGAACAAAACGA	down	-inf	-inf	0.229655	1.40804	0	0	1.3701	2.85402	0	0	0	0	4	2.5	0	0	0	low
149	PC-3p-176754_10	AATATTACGGACGAAACATGATGT	down	-inf	-inf	0.229861	2.81431	0	2.73488	0	5.70805	0	0	0	5	0	5	0	0	0	low
150	PC-5p-220503_7	AAGCAGCTAGTATGAAGGATTGTC	down	-inf	-inf	0.229861	3.94003	0	3.82883	0	7.99127	0	0	0	7	0	7	0	0	0	low
151	PC-5p-60559_42	TGGAGGCAGCGGCTTATCGATC	down	-inf	-inf	0.229873	1.68872	0	1.64093	3.42524	0	0	0	0	3	10	0	0	0	0	low
152	PC-5p-37664_74	TTGCTTGGTGCAGTTTGGAAGC	down	-inf	-inf	0.230791	17.6938	0	2.73488	12.6734	37.6731	0	0	0	5	37	33	0	0	0	middle
153	aof-miR160c	TGCCTGGCTCCCTGTATGCCA	up	1.7962	0.844951	0.231607	60.1793	108.094	30.6306	116.801	33.1067	90.4517	139.006	94.8257	56	341	29	20	197	71	middle
154	PC-3p-110493_19	AATCAATCACATGTATGCCACATC	down	-inf	-inf	0.231979	2.14365	0	4.3758	2.05514	0	0	0	0	8	6	0	0	0	0	low
155	PC-5p-137449_14	TAAGTTTTGTAGATTATATGTT	down	-inf	-inf	0.231979	2.14365	0	4.3758	2.05514	0	0	0	0	8	6	0	0	0	0	low
156	aof-MIR479-p5_2ss12TG22TG	TGTGATGTTGGGTCGGCTCATG	down	0.0876513	-3.51208	0.232511	135.974	11.9183	111.583	273.505	22.8322	22.6129	8.46734	4.67451	204	798.5	20	5	12	3.5	middle
157	gma-miR6300_R+5	GTCGTTGTAGTATAGTGGTGAGT	down	0.282136	-1.82554	0.232688	115.061	32.463	57.4324	74.8415	212.91	49.7484	22.9324	24.7081	105	218.5	186.5	11	32.5	18.5	middle
158	PC-3p-57073_45	ATTCCCGCCTTGCACCAACTGAATT	down	-inf	-inf	0.235281	2.91897	0	6.01673	2.74019	0	0	0	0	11	8	0	0	0	0	middle
159	PC-3p-107172_20	CATTTTCCTCTTCAAAACCCA	down	-inf	-inf	0.236565	1.6554	0	0	1.54136	3.42483	0	0	0	0	4.5	3	0	0	0	low
160	PC-5p-43974_62	ATGTGCCGTCCGACGAATGAGACC	down	-inf	-inf	0.237231	5.54145	0	11.4865	5.13786	0	0	0	0	21	15	0	0	0	0	middle
161	PC-3p-35616_78	GTTGAGAACTGCGAACTTAGT	down	-inf	-inf	0.237786	7.62913	0	1.36744	4.9666	16.5533	0	0	0	2.5	14.5	14.5	0	0	0	middle
162	cas-miR11592_L+4R+1_1ss23AC	AACCGAACCGAACCGAACCGAACC	down	-inf	-inf	0.239431	5.24495	0	10.9395	4.79534	0	0	0	0	20	14	0	0	0	0	middle
163	osa-miR5179	TTTTGCTCAAGACCGCGCAAC	down	0.130425	-2.93871	0.241121	151.869	19.8075	18.0502	295.427	142.13	29.3968	11.9954	18.0302	33	862.5	124.5	6.5	17	13.5	middle
164	aof-miR172_L-3	ATCTTGATGATGCTGCAT	up	8.51551	3.09009	0.242133	0.546975	4.65777	1.64093	0	0	0	5.29209	8.68123	3	0	0	0	7.5	6.5	low
165	PC-5p-150188_12	AGGACATGTTGTCTCGTCCAAGCC	down	-inf	-inf	0.244111	2.70191	0	0	2.39767	5.70805	0	0	0	0	7	5	0	0	0	low
166	PC-5p-30417_93	TTTGGAGGTTAGGTAACTATA	down	-inf	-inf	0.244589	6.80091	0	6.01673	14.386	0	0	0	0	11	42	0	0	0	0	middle
167	aof-miR477a_1ss21GA	ACTCTCCCTCAAGGGCTTCCA	down	0.13206	-2.92074	0.244785	8.90522	1.17602	0	16.4412	10.2745	0	3.52806	0	0	48	9	0	5	0	middle
168	ath-miR8175_L+3	TTCGATCCCCGGCAACGGCGCCA	down	-inf	-inf	0.245026	1.85998	0	1.64093	3.93903	0	0	0	0	3	11.5	0	0	0	0	low
169	PC-5p-274_11288	TAAGCTTATGGCTAGAGACCC	down	0.630493	-0.665448	0.246023	958.292	604.196	537.13	1068.85	1268.9	676.127	757.827	378.635	982	3120.5	1111.5	149.5	1074	283.5	high
170	PC-5p-146568_13	ATGTGGAATCCAATTGACATAGAC	down	-inf	-inf	0.246603	3.75771	0	3.28185	0	7.99127	0	0	0	6	0	7	0	0	0	low
171	gma-miR156aa_L-1R+3_1ss7GC	TTGGACTGAAGGGAGCTCCA	up	4.8398	2.27495	0.251357	0.741692	3.58964	0.683719	1.54136	0	5.65323	5.11569	0	1.25	4.5	0	1.25	7.25	0	low
172	aof-miR166b_L-2_1ss20CT	TCGGACCAGGCTTCATTTT	down	0.101264	-3.30381	0.252167	23.2268	2.35204	14.7683	5.82291	49.0892	0	7.05612	0	27	17	43	0	10	0	middle
173	osa-MIR444d-p5_2ss14CT17CT	TGCCTCAAGCTTGTTGTCTCC	up	2.26064	1.17673	0.252453	102.823	232.446	112.95	151.567	43.952	97.2356	381.736	218.366	206.5	442.5	38.5	21.5	541	163.5	middle
174	osa-MIR444d-p3_2ss14CT17CT	TGCCTCAAGCTTGTTGTCTCC	up	2.26064	1.17673	0.252453	102.823	232.446	112.95	151.567	43.952	97.2356	381.736	218.366	206.5	442.5	38.5	21.5	541	163.5	middle
175	PC-5p-80863_29	AACTGATGTCGTTCTTCTGGAGAA	down	-inf	-inf	0.25366	3.28362	0	7.11068	2.74019	0	0	0	0	13	8	0	0	0	0	low
176	gma-miR408a-3p_L-1R+4	TGCACTGCCTCTTCCCTGGCTTTT	up	inf	inf	0.253798	0	22.7092	0	0	0	0	18.9339	49.1936	0	0	0	0	26.8333	36.8333	middle
177	mdm-miR408a_L-1R+4	TGCACTGCCTCTTCCCTGGCTTTT	up	inf	inf	0.253798	0	22.7092	0	0	0	0	18.9339	49.1936	0	0	0	0	26.8333	36.8333	middle
178	aof-miR159_1ss20TC	TTTGGATTGAAGGGAGCTCCA	up	1.60976	0.686843	0.254361	334.99	539.252	349.517	456.242	199.211	420.601	793.814	403.343	639	1332	174.5	93	1125	302	high
179	PC-3p-93274_24	GAATTGTGTCACCTAAGGTTGT	down	-inf	-inf	0.254434	2.26889	0	4.92278	1.88388	0	0	0	0	9	5.5	0	0	0	0	low
180	osa-miR396a-3p_R+1	GTTCAATAAAGCTGTGGGAAA	down	0.0858265	-3.54243	0.255225	717.151	61.5506	489.543	1523.2	138.706	47.4872	98.4329	38.7316	895	4447	121.5	10.5	139.5	29	high
181	aof-miR390	AAGCTCAGGAGGGATAGCGCC	up	2.40749	1.26753	0.257239	2.90702	6.99864	6.83719	1.88388	0	11.3065	6.35051	3.33893	12.5	5.5	0	2.5	9	2.5	middle
182	cca-miR396a-3p_L-1_1ss12CG	TTCAAGAAAGGTGTGGGAAA	up	1.64273	0.716097	0.258948	88.6117	145.565	85.3281	153.108	27.3986	108.542	154.529	173.625	156	447	24	24	219	130	high
183	ptc-MIR6478-p3_2ss9GA19GA	CAGTTGGTAGAGCGGAGGACT	down	-inf	-inf	0.265	1.1059	0	2.46139	0.85631	0	0	0	0	4.5	2.5	0	0	0	0	low
184	PC-5p-52616_50	AATCTTAGGTGGTACAATCTCATT	down	-inf	-inf	0.265	1.1059	0	2.46139	0.85631	0	0	0	0	4.5	2.5	0	0	0	0	low
185	PC-5p-30939_92	TTCACAACTGCGGTCTTAGTTA	down	-inf	-inf	0.266109	2.45121	0	5.46975	1.88388	0	0	0	0	10	5.5	0	0	0	0	middle
186	PC-5p-223421_7	ATAGCAAATTACTGTAGCACC	down	-inf	-inf	0.26681	3.57538	0	2.73488	0	7.99127	0	0	0	5	0	7	0	0	0	low
187	zma-miR167d-3p_4ss10GC11CT12TG13GA	GGTCATGCTCTGACAGCCTCACT	down	0.230326	-2.11825	0.267595	10.2118	2.35204	4.3758	20.5514	5.70805	0	7.05612	0	8	60	5	0	10	0	middle
188	ptc-miR6478_R-2	CCGACCTTAGCTCAGTTGG	up	3.17055	1.66473	0.268533	119.581	379.138	140.573	77.753	140.418	271.355	715.138	150.92	257	227	123	60	1013.5	113	high
189	PC-5p-85915_27	ACTTGTGGAATCTCAAATCAAATT	down	-inf	-inf	0.269002	3.40886	0	7.65765	2.56893	0	0	0	0	14	7.5	0	0	0	0	low
190	PC-3p-117141_17	AATTGCAACTCAAGAGAATCTTGC	down	-inf	-inf	0.26903	2.54082	0	1.91441	0	5.70805	0	0	0	3.5	0	5	0	0	0	low
191	PC-3p-767_3820	GTCCCGGCAACGGAACCA	up	1.79842	0.846732	0.271409	165.626	297.866	56.8854	143.175	296.819	228.391	450.181	215.027	104	418	260	50.5	638	161	high
192	aof-miR160b_1ss12CT	TGCCTGGTTCCTTGTATGCCA	up	1.8347	0.875544	0.274138	13.1553	24.136	13.9479	25.518	0	22.6129	25.7548	24.0403	25.5	74.5	0	5	36.5	18	middle
193	osa-MIR159e-p5_1ss18AC	TTTGCATGACTCGGGAGCT	down	-inf	-inf	0.274353	4.51878	0	3.28185	0	10.2745	0	0	0	6	0	9	0	0	0	middle
194	PC-5p-131454_15	AACGAGACCACAGTTGTGAACTGC	down	-inf	-inf	0.274353	4.51878	0	3.28185	0	10.2745	0	0	0	6	0	9	0	0	0	middle
195	PC-5p-1494_1921	TGGGTGCAGTTGGATCTGCAG	down	-inf	-inf	0.276316	4.19968	0	3.00836	9.59067	0	0	0	0	5.5	28	0	0	0	0	high
196	PC-5p-72388_33	ATAAATGTATTGGGACCCACTTCT	down	-inf	-inf	0.276512	2.87295	0	6.5637	2.05514	0	0	0	0	12	6	0	0	0	0	low
197	osa-miR167h-3p_2ss3GA12TC	AGATCATGCTGCAGTTTCATC	down	-inf	-inf	0.276731	5.74361	0	4.10231	0	13.1285	0	0	0	7.5	0	11.5	0	0	0	middle
198	aof-miR396b_R+1_1	TTCCACAGCTTTCTTGAACTGA	down	0.0670955	-3.89764	0.277539	31.5496	2.11684	14.2214	9.07689	71.3506	0	6.35051	0	26	26.5	62.5	0	9	0	middle
199	aof-miR396b_R+1_2	TTCCACAGCTTTCTTGAACTGC	down	0.0670955	-3.89764	0.277539	31.5496	2.11684	14.2214	9.07689	71.3506	0	6.35051	0	26	26.5	62.5	0	9	0	middle
200	aof-miR159_R-1_1ss20TC	TTTGGATTGAAGGGAGCTCC	up	1.43358	0.519622	0.282705	11469.1	16441.9	13205.1	16360.7	4841.57	14205.4	16629.2	18491	24142	47765	4241	3141	23567	13845	high
201	gma-miR6300_1ss18GA	GTCGTTGTAGTATAGTGA	up	5.47686	2.45335	0.286225	3.13803	17.1866	2.73488	6.67922	0	33.9194	17.6403	0	5	19.5	0	7.5	25	0	middle
202	sbi-miR159b_R-1	CTTGGATTGAAGGGAGCTCC	up	1.52053	0.604574	0.286247	7.68531	11.6858	9.29858	8.04932	5.70805	11.3065	7.05612	16.6947	17	23.5	5	2.5	10	12.5	middle
203	PC-5p-89258_25	ATTTCGAGGTCGCTAATGAGAATT	down	-inf	-inf	0.286647	1.28822	0	3.00836	0.85631	0	0	0	0	5.5	2.5	0	0	0	0	low
204	gma-miR6300_R+1_1ss15GT	GTCGTTGTAGTATATTGGT	down	0.159052	-2.65243	0.287104	3.69696	0.58801	3.55534	7.53553	0	0	1.76403	0	6.5	22	0	0	2.5	0	middle
205	aof-miR395a_R-1	TGAAGTGTTTGGGGGAACTC	down	-inf	-inf	0.288799	4.59929	0	3.00836	10.7895	0	0	0	0	5.5	31.5	0	0	0	0	high
206	osa-MIR816-p3_2ss7TG17AC	TGGATAGGACAGAGGTCT	up	3.34083	1.74021	0.289665	2.45685	8.20792	2.46139	2.05514	2.85402	15.8291	2.11684	6.67787	4.5	6	2.5	3.5	3	5	middle
207	osa-MIR816-p5_2ss7TG17AC	TGGATAGGACAGAGGTCT	up	3.34083	1.74021	0.289665	2.45685	8.20792	2.46139	2.05514	2.85402	15.8291	2.11684	6.67787	4.5	6	2.5	3.5	3	5	middle
208	_1ss1AT	AGTGAATGATGCGGGAGCCAA	down	0.115021	-3.12003	0.289927	10.2244	1.17602	8.7516	21.9215	0	0	3.52806	0	16	64	0	0	5	0	middle
209	PC-5p-8225_357	TGTGCAAAGTCAAGGCTTGGA	down	0.750415	-0.41424	0.289974	33.1152	24.8501	25.7078	32.5398	41.098	22.6129	34.575	17.3625	47	95	36	5	49	13	middle
210	PC-3p-45004_60	CTTTGAAAGACCGCACAACTT	down	0.340142	-1.55579	0.290278	3.11169	1.05842	1.91441	1.71262	5.70805	0	3.17525	0	3.5	5	5	0	4.5	0	low
211	osa-miR396a-3p_R-2_1ss18GA	GTTCAATAAAGCTGTGGA	down	-inf	-inf	0.297123	6.24287	0	3.82883	14.8998	0	0	0	0	7	43.5	0	0	0	0	middle
212	osa-MIR5083-p5_1ss20GT	AATGGATCCTTCTGAGCCTT	up	3.27583	1.71186	0.29776	2.0755	6.79898	3.82883	2.39767	0	13.5678	2.82245	4.00672	7	7	0	3	4	3	middle
213	PC-5p-40066_69	TGGATGTAAAATCATGAGGTT	down	0.284829	-1.81183	0.299687	4.12887	1.17602	6.5637	5.82291	0	0	3.52806	0	12	17	0	0	5	0	middle
214	PC-3p-174672_10	CTTTTTGAAAAAGCGGGATTT	down	-inf	-inf	0.30403	2.3585	0	1.36744	0	5.70805	0	0	0	2.5	0	5	0	0	0	low
215	PC-3p-108903_19	AATGAGATTGTGTCATCTAAGATT	down	-inf	-inf	0.30403	5.66039	0	3.28185	0	13.6993	0	0	0	6	0	12	0	0	0	middle
216	PC-5p-171945_10	ATTGGACCCACTTCTCACTAAAAG	down	-inf	-inf	0.30403	4.71699	0	2.73488	0	11.4161	0	0	0	5	0	10	0	0	0	middle
217	PC-3p-314715_5	AATGAGATTGTGCCATCTAAGATT	down	-inf	-inf	0.30403	2.3585	0	1.36744	0	5.70805	0	0	0	2.5	0	5	0	0	0	low
218	PC-5p-39084_71	TGGAGTTGTCTTTTAGTGGTGA	down	-inf	-inf	0.304437	2.37111	0	5.74324	1.3701	0	0	0	0	10.5	4	0	0	0	0	middle
219	PC-3p-10250_286	GAAGGTCTTGTCGGAGAGTGA	down	-inf	-inf	0.30522	20.8521	0	5.46975	51.3786	5.70805	0	0	0	10	150	5	0	0	0	middle
220	lja-miR171c_2ss8AG10TC	TGAGCCGGACCAATATCACTC	down	0.373154	-1.42216	0.30842	2741.63	1023.05	4310.16	3693.27	221.472	1383.91	1035.49	649.757	7880	10782.5	194	306	1467.5	486.5	high
221	aof-miR479_1ss8AG	TGAGCCGGACCAATATCACTC	down	0.373154	-1.42216	0.30842	2741.63	1023.05	4310.16	3693.27	221.472	1383.91	1035.49	649.757	7880	10782.5	194	306	1467.5	486.5	high
222	PC-5p-49001_54	ACTTTCACACTACTAGACTCA	down	0.247223	-2.01611	0.310624	4.75691	1.17602	0	5.13786	9.13288	0	3.52806	0	0	15	8	0	5	0	middle
223	PC-5p-33245_85	TTTGAAAAATCGAGTTAGTTTTT	down	-inf	-inf	0.310749	10.7906	0	2.46139	3.08272	26.8278	0	0	0	4.5	9	23.5	0	0	0	middle
224	PC-3p-33245_85	TTTGAAAAATCGAGTTAGTTTTT	down	-inf	-inf	0.310749	10.7906	0	2.46139	3.08272	26.8278	0	0	0	4.5	9	23.5	0	0	0	middle
225	PC-5p-204299_7	ACTACTTTGGTATTACAAGAAACC	down	-inf	-inf	0.314483	3.23463	0	0	1.71262	7.99127	0	0	0	0	5	7	0	0	0	low
226	PC-5p-218860_7	ATAACCTCCACTCCTTGCACC	down	-inf	-inf	0.314483	3.23463	0	0	1.71262	7.99127	0	0	0	0	5	7	0	0	0	low
227	PC-5p-16293_180	TTTTTCAACTTCTTGACATGCA	down	0.329851	-1.60011	0.318121	4.99143	1.64643	2.1879	3.08272	9.70368	0	4.93928	0	4	9	8.5	0	7	0	middle
228	mes-miR171e_L-1_1ss9CG	TGAGCCGGGCCAATATCACT	down	0.631723	-0.662635	0.320365	108.31	68.4223	88.61	68.5048	167.817	72.3614	87.4959	45.4095	162	200	147	16	124	34	middle
229	PC-5p-132332_15	TCGAGTTTAGTGCAAATAGAC	down	-inf	-inf	0.320623	4.10988	0	0	2.05514	10.2745	0	0	0	0	6	9	0	0	0	middle
230	aof-miR398_1ss21GT	TGTGTTCTCAGGTCGCCCCTT	up	3.58595	1.84236	0.321571	1.2661	4.54017	1.91441	1.88388	0	0	4.93928	8.68123	3.5	5.5	0	0	7	6.5	middle
231	lja-miR171d-5p_L-1R+2_1ss9CG	TGAGCCGGGCCAATATCACTTT	down	-inf	-inf	0.322517	3.48807	0	8.7516	1.71262	0	0	0	0	16	5	0	0	0	0	low
232	aof-miR396a	TTCCACGGCTTTCTTGAACTG	up	1.46574	0.551632	0.323141	1255.14	1839.71	2081.24	1051.72	632.452	1320.6	2170.46	2028.07	3805	3070.5	554	292	3076	1518.5	high
233	vca-miR391-5p_2ss1TC19CT	CTCGCAGGAGAGATGATGTCG	down	0.340361	-1.55486	0.324228	2.07313	0.705612	1.36744	0.85631	3.99563	0	2.11684	0	2.5	2.5	3.5	0	3	0	low
234	PC-3p-115860_18	TCCATATAAGTTTGGGATAGAATC	down	-inf	-inf	0.326129	3.61517	0	0	1.71262	9.13288	0	0	0	0	5	8	0	0	0	low
235	osa-miR395x_L-1R+1_1ss16TA	TGAAGTGTTTGGAGAAGCTCC	down	-inf	-inf	0.328479	8.47328	0	2.1879	1.54136	21.6906	0	0	0	4	4.5	19	0	0	0	middle
236	PC-3p-57509_45	TGTGAATTCAAAGAGTGAGGA	down	0.187292	-2.41664	0.329293	3.13953	0.58801	0	2.56893	6.84966	0	1.76403	0	0	7.5	6	0	2.5	0	low
237	aof-miR479_L-1_1ss8AG	GAGCCGGACCAATATCACTC	down	0.360739	-1.47097	0.329427	40.5262	14.6194	61.8082	59.7705	0	13.5678	16.9347	13.3557	113	174.5	0	3	24	10	middle
238	PC-3p-56616_46	CTTTAAAAAATCGAGTTAGT	down	-inf	-inf	0.331407	24.6455	0	3.55534	7.02174	63.3594	0	0	0	6.5	20.5	55.5	0	0	0	middle
239	PC-5p-178130_9	TAGAATAACATAAAACATTTGG	down	-inf	-inf	0.33558	3.9957	0	0	1.71262	10.2745	0	0	0	0	5	9	0	0	0	middle
240	PC-3p-67086_37	TTCTGAACCTCAAGACTCGCT	down	-inf	-inf	0.33932	15.8437	0	41.0231	6.50796	0	0	0	0	75	19	0	0	0	0	middle
241	osa-miR160a-3p_2ss7AG21GA	GCGTGCGAGGAGCCAAGCATA	down	-inf	-inf	0.33936	18.6512	0	7.65765	48.2959	0	0	0	0	14	141	0	0	0	0	middle
242	osa-miR164c	TGGAGAAGCAGGGTACGTGCA	up	1.76685	0.821177	0.339496	16.3137	28.8238	20.5116	28.4295	0	13.5678	39.5143	33.3893	37.5	83	0	3	56	25	middle
243	aly-miR165a-3p_R+1	TCGGACCAGGCTTCATCCCCA	up	3.27769	1.71268	0.340481	1.40697	4.61162	1.82325	2.39767	0	0	8.93775	4.8971	3.33333	7	0	0	12.6667	3.66667	middle
244	aof-miR166c_1ss21CA	TCGGACCAGGCTTCATCCCCA	up	3.27769	1.71268	0.340481	1.40697	4.61162	1.82325	2.39767	0	0	8.93775	4.8971	3.33333	7	0	0	12.6667	3.66667	middle
245	PC-3p-3698_797	CATGTGCACTCCCTCTCCAGT	down	0.402194	-1.31404	0.342196	7.01764	2.82245	12.0335	6.16543	2.85402	0	8.46734	0	22	18	2.5	0	12	0	middle
246	gma-miR6300_L+1	CGTCGTTGTAGTATAGTGG	down	0.335897	-1.57391	0.343877	3.50113	1.17602	0	4.79534	5.70805	0	3.52806	0	0	14	5	0	5	0	low
247	osa-miR162a_R+2_1ss21GT	TCGATAAACCTCTGCATCCATTT	down	-inf	-inf	0.344956	31.7461	0	9.84555	2.05514	83.3375	0	0	0	18	6	73	0	0	0	middle
248	PC-3p-61501_41	CATATCTTTGGAACGATGCACC	down	-inf	-inf	0.345355	17.343	0	3.28185	3.08272	45.6644	0	0	0	6	9	40	0	0	0	middle
249	ptc-miR6478_R-1	CCGACCTTAGCTCAGTTGGT	up	1.95937	0.97039	0.345884	402.92	789.469	255.984	372.837	579.938	737.182	1360.77	270.454	468	1088.5	508	163	1928.5	202.5	high
250	osa-miR168a-3p_L-3_1ss19GC	CCCGCCTTGCACCAACTGAAT	down	0.48421	-1.0463	0.3483	949.217	459.62	1171.07	1509.33	167.246	486.178	414.547	478.135	2141	4406.5	146.5	107.5	587.5	358	high
251	osa-MIR156f-p5	CAGAAGAGAGTGAGCACACAG	up	3.64224	1.86483	0.349468	0.951342	3.46502	0	0	2.85402	0	7.05612	3.33893	0	0	2.5	0	10	2.5	low
252	osa-MIR156g-p5	CAGAAGAGAGTGAGCACACAG	up	3.64224	1.86483	0.349468	0.951342	3.46502	0	0	2.85402	0	7.05612	3.33893	0	0	2.5	0	10	2.5	low
253	PC-5p-257325_6	ATTATAAATACATTGGGATCCACT	down	-inf	-inf	0.349928	4.75678	0	0	1.71262	12.5577	0	0	0	0	5	11	0	0	0	middle
254	aof-miR164_R-2	TGGAGAAGCAGGGCACGTG	up	8.58513	3.10184	0.350544	1.85998	15.9682	1.64093	3.93903	0	0	9.17296	38.7316	3	11.5	0	0	13	29	middle
255	PC-3p-490_6394	CCTCTGTATTCCTCCTCCACT	up	1.97609	0.982651	0.351122	22.6347	44.7283	38.5617	25.3468	3.99563	22.6129	32.1053	79.4666	70.5	74	3.5	5	45.5	59.5	high
256	PC-3p-3831_768	TTGAGAATTCAAAGAGTGAGG	down	0.0811667	-3.62297	0.351287	111.46	9.04687	24.8874	28.087	281.407	0	20.4628	6.67787	45.5	82	246.5	0	29	5	middle
257	gma-MIR6300-p3_1ss18AG	CGTTGTAGTATAGTGGTGAGT	down	0.0783046	-3.67476	0.352297	94.6877	7.41448	16.4093	27.9157	239.738	11.3065	10.937	0	30	81.5	210	2.5	15.5	0	middle
258	gma-miR6300_1ss10GT	GTCGTTGTATTATAGTGG	down	0.322115	-1.63435	0.357472	2.19056	0.705612	2.46139	4.11029	0	0	2.11684	0	4.5	12	0	0	3	0	low
259	aof-miR159_1ss1TG	GTTGGATTGAAGGGAGCTCTA	down	0.360309	-1.47269	0.358822	20.3992	7.35001	23.5199	37.6777	0	0	12.701	9.34902	43	110	0	0	18	7	middle
260	osa-MIR2118e-p3_2ss12TA18CT	AAAAGAGAGTCAAAGAGT	down	0.110994	-3.17144	0.364592	13.7739	1.52883	2.73488	3.76777	34.8191	0	4.58648	0	5	11	30.5	0	6.5	0	middle
261	ath-miR8175_L+2	TCGATCCCCGGCAACGGCGCCA	down	0.360479	-1.47201	0.364642	3.26238	1.17602	4.64929	5.13786	0	0	3.52806	0	8.5	15	0	0	5	0	low
262	PC-3p-80101_29	CAATACCATGTTGCAGACCCTGCC	down	-inf	-inf	0.36806	7.53471	0	0	2.05514	20.549	0	0	0	0	6	18	0	0	0	middle
263	PC-5p-105668_20	ATCGGAGAATGAATTTCATGACCC	down	-inf	-inf	0.36806	6.27892	0	0	1.71262	17.1241	0	0	0	0	5	15	0	0	0	middle
264	aof-miR159	TTTGGATTGAAGGGAGCTCTA	down	0.512764	-0.963633	0.370922	22194.3	11380.4	28938	34102.6	3542.42	14831.8	11706.1	7603.42	52905.5	99562.5	3103	3279.5	16590	5693	high
265	mtr-MIR164a-p3	CACGTGCTCCCCTTCTCCAAC	down	0.3648	-1.45482	0.371918	3.66111	1.33557	6.01673	4.9666	0	0	0	4.00672	11	14.5	0	0	0	3	low
266	aly-miR164a-3p_1ss6AG	CACGTGCTCCCCTTCTCCAAC	down	0.3648	-1.45482	0.371918	3.66111	1.33557	6.01673	4.9666	0	0	0	4.00672	11	14.5	0	0	0	3	low
267	gma-miR6300_R+7	GTCGTTGTAGTATAGTGGTGAGTAT	down	0.697275	-0.520201	0.373687	51.6897	36.0419	31.998	44.8707	78.2003	40.7033	30.6941	36.7283	58.5	131	68.5	9	43.5	27.5	high
268	lus-miR828a	TCTTGCTCAAATGAGTGTTCCA	down	0.282841	-1.82194	0.373754	58.3542	16.5049	29.2632	131.529	14.2701	18.0903	19.4043	12.0202	53.5	384	12.5	4	27.5	9	high
269	mes-miR828a_1ss17AG	TCTTGCTCAAATGAGTGTTCCA	down	0.282841	-1.82194	0.373754	58.3542	16.5049	29.2632	131.529	14.2701	18.0903	19.4043	12.0202	53.5	384	12.5	4	27.5	9	high
270	bdi-miR164a-3p_2ss10TA20CT	CATGTGCCCATCTTCTCCATC	down	0.80936	-0.305147	0.374816	23.7601	19.2304	27.8957	27.4019	15.9825	22.6129	19.0515	16.0269	51	80	14	5	27	12	middle
271	osa-miR156b-3p_2ss8-T12TA	GCTCACTTCTCAATCTGTCAGC	down	0.109427	-3.19196	0.375321	27.9425	3.05765	7.11068	4.79534	71.9214	0	9.17296	0	13	14	63	0	13	0	middle
272	osa-miR5072_L-3	TTCCCCAGCGGAGTCGCCA	down	0.221608	-2.17392	0.376096	3.18406	0.705612	2.1879	7.36427	0	0	2.11684	0	4	21.5	0	0	3	0	low
273	mtr-MIR319b-p5	TAGCTGCTGACTCATTCATCC	down	-inf	-inf	0.376343	5.15632	0	0	1.19883	14.2701	0	0	0	0	3.5	12.5	0	0	0	middle
274	bdi-miR7782-3p_R-5_1ss3CG	ACGTGCTCTGATACCATGT	down	0.219775	-2.1859	0.37679	1165.11	256.062	431.563	287.378	2776.4	373.113	238.144	156.93	789	839	2432	82.5	337.5	117.5	high
275	PC-5p-113497_18	CAACGTGGCTCGATTTGAACAGT	down	-inf	-inf	0.378997	7.80107	0	0	1.71262	21.6906	0	0	0	0	5	19	0	0	0	middle
276	aof-miR477a_2ss8CT21GT	ACTCTCCTTCAAGGGCTTCCT	down	0.104372	-3.2602	0.379768	15.7747	1.64643	6.5637	40.7604	0	0	4.93928	0	12	119	0	0	7	0	middle
277	aof-miR160b	TGCCTGGTTCCCTGTATGCCA	up	1.58738	0.666646	0.382356	240.937	382.459	162.452	488.439	71.9214	307.536	456.531	383.31	297	1426	63	68	647	287	middle
278	aof-miR393a_L+1R-5	TTCCAAAGGGATCGCATT	down	0.249724	-2.00159	0.383366	3.76742	0.940816	0	2.74019	8.56207	0	2.82245	0	0	8	7.5	0	4	0	middle
279	lja-MIR7528-p3_2ss14AG18TC	AATGCTAATCTGAGGCTC	down	-inf	-inf	0.384709	4.47134	0	0	0.85631	12.5577	0	0	0	0	2.5	11	0	0	0	middle
280	lja-MIR7528-p5_2ss14AG18TC	AATGCTAATCTGAGGCTC	down	-inf	-inf	0.384709	4.47134	0	0	0.85631	12.5577	0	0	0	0	2.5	11	0	0	0	middle
281	osa-MIR171g-p3_1	TGAGCCGAGCCAATATCACTT	down	0.288084	-1.79544	0.387438	5.30687	1.52883	2.73488	1.19883	11.9869	0	4.58648	0	5	3.5	10.5	0	6.5	0	middle
282	osa-MIR171g-p3_2	TGAGCCGAGCCAATATCACTTC	down	0.288084	-1.79544	0.387438	5.30687	1.52883	2.73488	1.19883	11.9869	0	4.58648	0	5	3.5	10.5	0	6.5	0	middle
283	gma-MIR10423-p3_1ss3AC	CTCTCAATGAAAGCACCA	down	0.21896	-2.19126	0.393865	171.144	37.4738	38.2883	56.174	418.971	49.7484	47.9816	14.6913	70	164	367	11	68	11	middle
284	osa-miR5083	AGACTACAATTATCTGATCA	down	0.312962	-1.67594	0.394751	3.75771	1.17602	3.28185	0	7.99127	0	3.52806	0	6	0	7	0	5	0	low
285	PC-3p-34888_80	CAACAATTACTAAAAGACAAGC	down	0.202646	-2.30296	0.398651	6.96397	1.41122	0	3.76777	17.1241	0	4.23367	0	0	11	15	0	6	0	middle
286	ptc-miR6478_2ss20TC21GA	CCGACCTTAGCTCAGTTGGCA	up	4.34925	2.12077	0.40117	6.24253	27.1503	3.82883	6.3367	8.56207	15.8291	65.6219	0	7	18.5	7.5	3.5	93	0	middle
287	aof-miR319a	TTGGACTGAAGGGAGCTCCCT	down	0.241694	-2.04875	0.40174	2250.74	543.99	611.518	5481.41	659.28	542.71	979.742	109.517	1118	16003	577.5	120	1388.5	82	high
288	osa-MIR159c-p5_2ss13GA19TC	TTTGCATGACCCAGGAGACGA	up	1.32805	0.409308	0.408405	61.9993	82.3381	80.6788	47.0971	58.2221	45.2259	95.6104	106.178	147.5	137.5	51	10	135.5	79.5	middle
289	ptc-miR6478_R+1_1ss21GA	CCGACCTTAGCTCAGTTGGTAG	up	2.35101	1.23328	0.409212	20.8886	49.1092	12.0335	15.2423	35.3899	31.6581	102.314	13.3557	22	44.5	31	7	145	10	middle
290	gma-MIR5368-p3_1ss17CA	GAGATACCACTCTGGAAG	down	0.0419892	-4.57384	0.410248	14.0038	0.58801	0	2.05514	39.9563	0	1.76403	0	0	6	35	0	2.5	0	middle
291	gma-miR6300_L-1R+8	TCGTTGTAGTATAGTGGTGAGTATT	down	0.0472041	-4.40494	0.410842	442.492	20.8874	57.4324	10.2757	1259.77	20.3516	16.9347	25.3759	105	30	1103.5	4.5	24	19	high
292	gma-MIR6300-p3_1ss13AG_2	TAGTATAGTGGTGAGTATT	down	0.0186527	-5.74447	0.412465	103.126	1.92358	5.19626	3.93903	300.243	0	1.76403	4.00672	9.5	11.5	263	0	2.5	3	middle
293	gma-MIR6300-p3_1ss13AG_1	TAGTATAGTGGTGAGTAT	down	0.0186527	-5.74447	0.412465	103.126	1.92358	5.19626	3.93903	300.243	0	1.76403	4.00672	9.5	11.5	263	0	2.5	3	middle
294	zma-MIR159e-p5_2ss11CG17CT	GCGGCGACGGGGGCGGTC	up	5.45316	2.44709	0.413119	2.57822	14.0595	3.28185	4.45281	0	36.1807	5.9977	0	6	13	0	8	8.5	0	middle
295	ptc-miR6478_R-1_1ss10GA	CCGACCTTAACTCAGTTGGT	up	2.61803	1.38848	0.41466	6.64214	17.3894	3.82883	7.53553	8.56207	15.8291	36.339	0	7	22	7.5	3.5	51.5	0	middle
296	PC-5p-31566_90	AAAGCCAGGGATGACTTGCC	down	0.395546	-1.33808	0.415843	2.37853	0.940816	0	4.28155	2.85402	0	2.82245	0	0	12.5	2.5	0	4	0	low
297	aof-miR396b_2ss20TC21GA	TTCCACAGCTTTCTTGAACCA	up	2.80862	1.48986	0.417937	78.4222	220.258	96.2676	65.9359	73.063	33.9194	494.634	132.222	176	192.5	64	7.5	701	99	middle
298	gma-MIR6300-p3_1ss17AG	GTTGTAGTATAGTGGTGAGTA	down	0.565343	-0.8228	0.419892	12.3348	6.97342	10.119	4.62408	22.2614	11.3065	4.93928	4.67451	18.5	13.5	19.5	2.5	7	3.5	middle
299	zma-miR156i-3p	GCTCACTGCTCTATCTGTCATC	down	0.306397	-1.70653	0.420173	19.5884	6.00183	3.28185	9.24815	46.2352	0	11.9954	6.01008	6	27	40.5	0	17	4.5	middle
300	mtr-miR319a-3p	TTGGACTGAAGGGAGCTCCC	down	0.626832	-0.673848	0.421354	765.466	479.819	484.347	1199.01	613.045	456.781	891.188	91.4868	885.5	3500.5	537	101	1263	68.5	high
301	PC-3p-49791_53	TATGTTTGAGGTAAGAATCCA	up	2.10501	1.07383	0.421445	3.46772	7.29958	4.92278	5.48039	0	0	9.87857	12.0202	9	16	0	0	14	9	middle
302	sbi-miR156a_1ss20CT	TGACAGAAGAGAGTGAGCAT	up	inf	inf	0.42265	0	0.58801	0	0	0	0	1.76403	0	0	0	0	0	2.5	0	low
303	lus-miR156a_L+1R+1	CTGACAGAAGAGAGTGAGCACT	down	-inf	-inf	0.42265	2.47349	0	0	0	7.42046	0	0	0	0	0	6.5	0	0	0	low
304	stu-miR156f-5p_L-1R+1	TGACAGAAGAGAGTGAGCAT	up	inf	inf	0.42265	0	0.58801	0	0	0	0	1.76403	0	0	0	0	0	2.5	0	low
305	osa-miR164d_1ss20CA	TGGAGAAGCAGGGCACGTGAT	down	-inf	-inf	0.42265	0.951342	0	0	0	2.85402	0	0	0	0	0	2.5	0	0	0	low
306	aof-MIR167b-p3_1ss5CT	AGATTATGTTGCAGTTTCATC	down	-inf	-inf	0.42265	0.951342	0	0	0	2.85402	0	0	0	0	0	2.5	0	0	0	middle
307	osa-miR167c-3p_2ss10GC14CT	GGTCATGCTCCGGTAGCCTCACT	down	-inf	-inf	0.42265	1.25592	0	0	3.76777	0	0	0	0	0	11	0	0	0	0	low
308	osa-miR169e_2ss13AG21GA	TAGCCAAGGATGGCTTGCCGA	down	-inf	-inf	0.42265	0.342524	0	0	1.02757	0	0	0	0	0	3	0	0	0	0	low
309	ath-miR170-3p	TGATTGAGCCGTGTCAATATC	down	-inf	-inf	0.42265	0.570873	0	0	1.71262	0	0	0	0	0	5	0	0	0	0	middle
310	aof-MIR171c-p5_1ss11GA	AGGTATTGGCATGTCTCAATT	down	-inf	-inf	0.42265	0.685048	0	0	2.05514	0	0	0	0	0	6	0	0	0	0	low
311	aof-miR171a	TGATTGAGCCGTGCCAATATC	up	inf	inf	0.42265	0	1.17602	0	0	0	0	3.52806	0	0	0	0	0	5	0	high
312	mtr-miR172c-5p_1ss9AT	GTAGCATCTTCAAGATTCACA	down	-inf	-inf	0.42265	1.14161	0	0	0	3.42483	0	0	0	0	0	3	0	0	0	low
313	aof-miR393a_1ss22CT	TCCAAAGGGATCGCATTGATTT	down	-inf	-inf	0.42265	0.911625	0	2.73488	0	0	0	0	0	5	0	0	0	0	0	middle
314	osa-miR396a-3p_R-2_1ss18GT	GTTCAATAAAGCTGTGGT	down	-inf	-inf	0.42265	0.456699	0	0	1.3701	0	0	0	0	0	4	0	0	0	0	low
315	osa-miR396a-3p_R+1_1ss12CT	GTTCAATAAAGTTGTGGGAAA	down	-inf	-inf	0.42265	10.9037	0	0	32.7111	0	0	0	0	0	95.5	0	0	0	0	middle
316	osa-miR399j	TGCCAAAGGAGAGTTGCCCTA	down	-inf	-inf	0.42265	0.799223	0	0	2.39767	0	0	0	0	0	7	0	0	0	0	middle
317	osa-miR399a	TGCCAAAGGAGAATTGCCCTG	up	inf	inf	0.42265	0	1.64643	0	0	0	0	4.93928	0	0	0	0	0	7	0	middle
318	ppe-miR477-5p_R-1_1ss20TA	ACTCTCCCTCAAAGGCTTCAA	down	-inf	-inf	0.42265	0.570873	0	0	1.71262	0	0	0	0	0	5	0	0	0	0	low
319	aof-MIR536-p5_1ss12GT	CGCACATGGCGTGGGACGATC	up	inf	inf	0.42265	0	1.41122	0	0	0	0	4.23367	0	0	0	0	0	6	0	middle
320	aof-miR536_1ss15GT	TCGTGCCACGCTGTTTGCGTC	up	inf	inf	0.42265	0	2.35204	0	0	0	0	7.05612	0	0	0	0	0	10	0	middle
321	aof-MIR827-p3_1ss18TC	TGACCATCAACAAACACCTTC	down	-inf	-inf	0.42265	0.951342	0	0	0	2.85402	0	0	0	0	0	2.5	0	0	0	low
322	mes-miR828a_L+3_1ss20AG	ACCTCTTGCTCAAATGAGTGTTCCA	down	-inf	-inf	0.42265	0.285437	0	0	0.85631	0	0	0	0	0	2.5	0	0	0	0	low
323	stu-MIR6027-p3_2ss2GT18TG_2	TTGAGAATTCAAAGAGTGAG	down	-inf	-inf	0.42265	16.5533	0	0	0	49.66	0	0	0	0	0	43.5	0	0	0	middle
324	stu-MIR6027-p3_2ss2GT18TG_1	TTGAGAATTCAAAGAGTG	down	-inf	-inf	0.42265	16.5533	0	0	0	49.66	0	0	0	0	0	43.5	0	0	0	middle
325	cca-MIR156b-p3_2ss8TA19GC	CACTTGTAGGACTTATGCC	down	-inf	-inf	0.42265	3.6151	0	0	0	10.8453	0	0	0	0	0	9.5	0	0	0	middle
326	mdm-MIR159b-p5_1ss1TG	GGCTGCTGGTTCATGGATACC	down	-inf	-inf	0.42265	0.455813	0	1.36744	0	0	0	0	0	2.5	0	0	0	0	0	low
327	aof-miR159_1ss7TG	TTTGGAGTGAAGGGAGCTCTA	down	-inf	-inf	0.42265	0.342524	0	0	1.02757	0	0	0	0	0	3	0	0	0	0	low
328	bdi-miR164a-3p_L+1R-1_1ss11TA	TCATGTGCCCATCTTCTCCAC	down	-inf	-inf	0.42265	4.56699	0	0	13.701	0	0	0	0	0	40	0	0	0	0	middle
329	aof-MIR166b-p5_1ss18TC	AGTTTGATCCAAGATCTCTTC	down	-inf	-inf	0.42265	1.90268	0	0	0	5.70805	0	0	0	0	0	5	0	0	0	low
330	ata-MIR395d-p5_2ss13TA18AT	TCTCAGGGCTCAAGTGAT	down	-inf	-inf	0.42265	2.09295	0	0	0	6.27885	0	0	0	0	0	5.5	0	0	0	low
331	aof-miR395a_R-2	TGAAGTGTTTGGGGGAACT	down	-inf	-inf	0.42265	1.02757	0	0	3.08272	0	0	0	0	0	9	0	0	0	0	high
332	aof-miR396a_1ss2TA	TACCACGGCTTTCTTGAACTG	down	-inf	-inf	0.42265	0.455813	0	1.36744	0	0	0	0	0	2.5	0	0	0	0	0	low
333	ath-MIR846-p3_2ss16TA17CT	GCAGTGGGATAATGAATT	down	-inf	-inf	0.42265	3.80537	0	0	0	11.4161	0	0	0	0	0	10	0	0	0	middle
334	osa-miR1863a_R-3_2ss1AT18AG	TGCTCTGATACCATGTTGGAT	down	-inf	-inf	0.42265	1.90268	0	0	0	5.70805	0	0	0	0	0	5	0	0	0	low
335	mtr-MIR2600a-p5_2ss6GC18CA	AGAGACAGAAACACAAAAA	down	-inf	-inf	0.42265	1.14161	0	0	0	3.42483	0	0	0	0	0	3	0	0	0	middle
336	mtr-MIR2600a-p3_2ss6GC18CA	AGAGACAGAAACACAAAAA	down	-inf	-inf	0.42265	1.14161	0	0	0	3.42483	0	0	0	0	0	3	0	0	0	middle
337	mtr-MIR2625-p3_2ss14AC17TA	TTATCGTGGCACACAAAT	down	-inf	-inf	0.42265	1.90268	0	0	0	5.70805	0	0	0	0	0	5	0	0	0	low
338	mtr-MIR2625-p5_2ss14AC17TA	TTATCGTGGCACACAAAT	down	-inf	-inf	0.42265	1.90268	0	0	0	5.70805	0	0	0	0	0	5	0	0	0	low
339	gma-miR4995_L-1R-1	GGCAGTGGCTTGGTTAAGG	down	-inf	-inf	0.42265	0.342524	0	0	1.02757	0	0	0	0	0	3	0	0	0	0	middle
340	osa-MIR5079a-p3_2ss4GT17TC	AAATGGTTCTCAAAAACTCG	down	-inf	-inf	0.42265	1.33188	0	0	0	3.99563	0	0	0	0	0	3.5	0	0	0	middle
341	osa-MIR5083-p5_2ss19AC20CA	ACTACAATTATCTGATCACA	down	-inf	-inf	0.42265	8.75234	0	0	0	26.257	0	0	0	0	0	23	0	0	0	middle
342	gma-MIR5368-p3_2ss1AT18CA	TGAGATACCACTCTGGAAG	down	-inf	-inf	0.42265	24.7349	0	0	0	74.2046	0	0	0	0	0	65	0	0	0	high
343	gma-MIR5368-p5_1ss12CA	ACCACTCTGGAAGAGCTAG	down	-inf	-inf	0.42265	4.56644	0	0	0	13.6993	0	0	0	0	0	12	0	0	0	middle
344	gma-MIR5368-p5_2ss1AT18CA	TGAGATACCACTCTGGAAG	down	-inf	-inf	0.42265	24.7349	0	0	0	74.2046	0	0	0	0	0	65	0	0	0	high
345	gma-miR5368_L+1	GGGACAGTCTCAGGTAGACA	down	-inf	-inf	0.42265	0.285437	0	0	0.85631	0	0	0	0	0	2.5	0	0	0	0	middle
346	gma-MIR5368-p3_1ss2GA	CAAGGGACAGTCTCAGGTAGA	down	-inf	-inf	0.42265	0.951342	0	0	0	2.85402	0	0	0	0	0	2.5	0	0	0	middle
347	gma-MIR5368-p5_1ss16CT	AATTCTAACCTTGTGTCAGGA	down	-inf	-inf	0.42265	0.455813	0	1.36744	0	0	0	0	0	2.5	0	0	0	0	0	middle
348	gma-MIR5368-p5_1ss22CT	AGCTAGAATTCTAACCTTGTGT	down	-inf	-inf	0.42265	0.951342	0	0	0	2.85402	0	0	0	0	0	2.5	0	0	0	middle
349	gma-MIR5368-p3_1ss16CT	AATTCTAACCTTGTGTCAGGA	down	-inf	-inf	0.42265	0.455813	0	1.36744	0	0	0	0	0	2.5	0	0	0	0	0	middle
350	gma-MIR5761a-p5_2ss3TA18CG	TGAAATGATGATCCAAAGT	down	-inf	-inf	0.42265	3.80537	0	0	0	11.4161	0	0	0	0	0	10	0	0	0	middle
351	hbr-miR6173_L-2	CCGTAAACGATGGATACT	up	inf	inf	0.42265	0	0.58801	0	0	0	0	1.76403	0	0	0	0	0	2.5	0	middle
352	hbr-MIR6173-p5_1ss1CT	TGCTGTAGCTAACGCGTT	down	-inf	-inf	0.42265	4.37617	0	0	0	13.1285	0	0	0	0	0	11.5	0	0	0	middle
353	gma-miR6300_1ss1GA	ATCGTTGTAGTATAGTGG	down	-inf	-inf	0.42265	0.627961	0	0	1.88388	0	0	0	0	0	5.5	0	0	0	0	low
354	bdi-MIR7757-p3_2ss7TG19CT_2	GAAGATGATGAGAGATAATT	down	-inf	-inf	0.42265	10.0842	0	0	0	30.2527	0	0	0	0	0	26.5	0	0	0	middle
355	bdi-MIR7757-p5_2ss7TG19CT_2	GAAGATGATGAGAGATAATT	down	-inf	-inf	0.42265	10.0842	0	0	0	30.2527	0	0	0	0	0	26.5	0	0	0	middle
356	bdi-MIR7757-p3_2ss7TG19CT_1	GAAGATGATGAGAGATAAT	down	-inf	-inf	0.42265	10.0842	0	0	0	30.2527	0	0	0	0	0	26.5	0	0	0	middle
357	bdi-MIR7757-p5_2ss7TG19CT_1	GAAGATGATGAGAGATAAT	down	-inf	-inf	0.42265	10.0842	0	0	0	30.2527	0	0	0	0	0	26.5	0	0	0	middle
358	bdi-miR7782-3p_L-1R-2_2ss3CG22TG	CGTGCTCTGATACCATGTTGG	down	-inf	-inf	0.42265	2.66376	0	0	0	7.99127	0	0	0	0	0	7	0	0	0	low
359	ath-miR8175_L+4	GTTCGATCCCCGGCAACGGCGCCA	down	-inf	-inf	0.42265	0.685048	0	0	2.05514	0	0	0	0	0	6	0	0	0	0	low
360	gra-MIR8776d-p5_2ss15TG18GT	AGGGGAGCAAATGGGATT	down	-inf	-inf	0.42265	0.951342	0	0	0	2.85402	0	0	0	0	0	2.5	0	0	0	low
361	gma-MIR9726-p5_2ss3AT19TC	GTTTAGGCATTATTTTTTCC	down	-inf	-inf	0.42265	6.27885	0	0	0	18.8366	0	0	0	0	0	16.5	0	0	0	middle
362	gma-MIR9726-p3_2ss3AT19TC	GTTTAGGCATTATTTTTTCC	down	-inf	-inf	0.42265	6.27885	0	0	0	18.8366	0	0	0	0	0	16.5	0	0	0	middle
363	gma-MIR9726-p5_2ss2AT18TC	TTTAGGCATTATTTTTTCC	down	-inf	-inf	0.42265	8.18154	0	0	0	24.5446	0	0	0	0	0	21.5	0	0	0	middle
364	tae-miR9773_R-4_1ss2TC	TCTGTTTTTATGTTATTTTG	down	-inf	-inf	0.42265	1.33188	0	0	0	3.99563	0	0	0	0	0	3.5	0	0	0	middle
365	tae-miR9773_R-5_1ss2TC	TCTGTTTTTATGTTATTTT	down	-inf	-inf	0.42265	0.951342	0	0	0	2.85402	0	0	0	0	0	2.5	0	0	0	middle
366	ahy-miR156b-5p_R+2	TTGACAGAAGATAGAGAGCACCA	up	inf	inf	0.42265	0	1.17602	0	0	0	0	3.52806	0	0	0	0	0	5	0	low
367	mtr-miR169d-5p_L+1R-1_1ss21GA	GAAGCCAAGGATGACTTGCCA	down	-inf	-inf	0.42265	0.285437	0	0	0.85631	0	0	0	0	0	2.5	0	0	0	0	low
368	bdi-miR319b-5p_2ss7CT8TC	AGAGCTTCCTTCAGTCCACTC	down	-inf	-inf	0.42265	1.14175	0	0	3.42524	0	0	0	0	0	10	0	0	0	0	low
369	aly-miR319a-5p_2ss12GC19TC	AGAGCTTCCTTCAGTCCACTC	down	-inf	-inf	0.42265	1.14175	0	0	3.42524	0	0	0	0	0	10	0	0	0	0	low
370	osa-miR319a-3p.2-3p_R+1	TTGGACTGAAGGGTGCTCCCT	down	-inf	-inf	0.42265	0.303875	0	0.911625	0	0	0	0	0	1.66667	0	0	0	0	0	middle
371	bdi-miR528-5p_R+2	TGGAAGGGGCATGCAGAGGAGCA	up	inf	inf	0.42265	0	4.46888	0	0	0	0	13.4066	0	0	0	0	0	19	0	middle
372	vvi-miR3623-5p	TCACAAGTTCATCCAAGCACCA	down	-inf	-inf	0.42265	2.28322	0	0	0	6.84966	0	0	0	0	0	6	0	0	0	low
373	vvi-miR3630-3p_L-3R-1_1ss4GT	TGGAATCTCTCTGATGCA	down	-inf	-inf	0.42265	1.90268	0	0	0	5.70805	0	0	0	0	0	5	0	0	0	low
374	ath-miR5021_L+1R-3	ATGAGAAGAAGAAGAAGA	up	inf	inf	0.42265	0	1.11298	0	0	0	0	0	3.33893	0	0	0	0	0	2.5	low
375	sly-miR5302a_R-2_1ss6AG	AAACGGGGTTTGTTACTTT	down	-inf	-inf	0.42265	3.80537	0	0	0	11.4161	0	0	0	0	0	10	0	0	0	middle
376	gma-miR9748_L-1R-3_1ss17GC	AAGGAAGTGTAGAGGCAT	down	-inf	-inf	0.42265	1.90268	0	0	0	5.70805	0	0	0	0	0	5	0	0	0	low
377	PC-5p-277993_5	GTTTTGTTCGGAGTTCAGATC	down	-inf	-inf	0.42265	0.951342	0	0	0	2.85402	0	0	0	0	0	2.5	0	0	0	low
378	PC-3p-25677_112	CAGGTCATCCTTGGCTTTAGT	down	-inf	-inf	0.42265	2.22641	0	0	6.67922	0	0	0	0	0	19.5	0	0	0	0	middle
379	PC-3p-94764_23	ATCCTCGGACGGCACATGATGTGC	down	-inf	-inf	0.42265	0.455813	0	1.36744	0	0	0	0	0	2.5	0	0	0	0	0	low
380	PC-3p-78468_30	GAGGCCTTTGTTGGAGAGTAG	down	-inf	-inf	0.42265	2.22641	0	0	6.67922	0	0	0	0	0	19.5	0	0	0	0	low
381	PC-5p-350896_5	TTCCTCACTCTTTAAATTCTC	down	-inf	-inf	0.42265	0.285437	0	0	0.85631	0	0	0	0	0	2.5	0	0	0	0	low
382	PC-3p-98298_22	AATGATCACTAAAAGACAAACTCC	down	-inf	-inf	0.42265	0.285437	0	0	0.85631	0	0	0	0	0	2.5	0	0	0	0	middle
383	PC-3p-23545_123	CATGCAGATCAAACTACACCCATT	down	-inf	-inf	0.42265	1.02757	0	0	3.08272	0	0	0	0	0	9	0	0	0	0	middle
384	PC-3p-58175_44	TCATGCTTTGAGATGTTCACC	down	-inf	-inf	0.42265	0.627961	0	0	1.88388	0	0	0	0	0	5.5	0	0	0	0	low
385	PC-3p-107935_20	TTTGTAGAGAGGTATACAACC	down	-inf	-inf	0.42265	2.28322	0	0	0	6.84966	0	0	0	0	0	6	0	0	0	low
386	PC-3p-83646_28	GACGCTCATTCGGGCAAGATG	down	-inf	-inf	0.42265	1.52215	0	0	0	4.56644	0	0	0	0	0	4	0	0	0	middle
387	PC-5p-71476_34	ACTAGTGTGGTAGAAAGAACT	down	-inf	-inf	0.42265	2.28322	0	0	0	6.84966	0	0	0	0	0	6	0	0	0	middle
388	PC-5p-132593_15	GTTATATGGTCGAATGGGTA	down	-inf	-inf	0.42265	1.90268	0	0	0	5.70805	0	0	0	0	0	5	0	0	0	low
389	PC-3p-311355_5	TTCCGAACTGCATCAAACAGA	up	inf	inf	0.42265	0	1.17602	0	0	0	0	3.52806	0	0	0	0	0	5	0	low
390	PC-3p-242440_6	ATCTACATATTGGTGAATCCT	down	-inf	-inf	0.42265	0.627961	0	0	1.88388	0	0	0	0	0	5.5	0	0	0	0	low
391	PC-3p-28471_100	TAGTACCATGAGAATGACCCTGCC	down	-inf	-inf	0.42265	4.94698	0	0	0	14.8409	0	0	0	0	0	13	0	0	0	middle
392	PC-5p-347108_5	TGTTTCCATTCATCCACCTTA	up	inf	inf	0.42265	0	1.17602	0	0	0	0	3.52806	0	0	0	0	0	5	0	low
393	PC-5p-131179_15	TTAGCCATTGATTAATCTTCT	down	-inf	-inf	0.42265	1.71241	0	0	0	5.13724	0	0	0	0	0	4.5	0	0	0	low
394	PC-5p-120083_17	AATCTTAGTTGGCACAATCTCATT	down	-inf	-inf	0.42265	1.71241	0	0	0	5.13724	0	0	0	0	0	4.5	0	0	0	low
395	PC-3p-150458_12	CCACTAAAAGACAACCTCATG	down	-inf	-inf	0.42265	2.28322	0	0	0	6.84966	0	0	0	0	0	6	0	0	0	low
396	PC-5p-361_8563	GTTCCTCCCAACCACTTCAGT	down	-inf	-inf	0.42265	1.3701	0	0	4.11029	0	0	0	0	0	12	0	0	0	0	high
397	PC-5p-143100_13	AAATAACTCTGTTTTTCAAATACC	down	-inf	-inf	0.42265	1.33188	0	0	0	3.99563	0	0	0	0	0	3.5	0	0	0	low
398	PC-3p-154326_12	AATGAGATTGCGTCACCTAAGATT	down	-inf	-inf	0.42265	1.09395	0	3.28185	0	0	0	0	0	6	0	0	0	0	0	low
399	PC-5p-254201_6	AATGTAGAAAATCACACTCAATTA	down	-inf	-inf	0.42265	4.1859	0	0	0	12.5577	0	0	0	0	0	11	0	0	0	middle
400	PC-3p-110197_19	AATGGGATTGTGACACATAAGGTT	down	-inf	-inf	0.42265	0.911625	0	2.73488	0	0	0	0	0	5	0	0	0	0	0	low
401	PC-5p-151025_12	CTGCGGCCTCTCTTTAACATG	up	inf	inf	0.42265	0	1.64643	0	0	0	0	4.93928	0	0	0	0	0	7	0	low
402	PC-3p-117215_17	AGTGGGCCTCAATGTATTTAT	down	-inf	-inf	0.42265	0.911625	0	2.73488	0	0	0	0	0	5	0	0	0	0	0	low
403	PC-5p-204759_7	AATAGCGACCTCGTATAACCAAAG	down	-inf	-inf	0.42265	1.90268	0	0	0	5.70805	0	0	0	0	0	5	0	0	0	low
404	PC-3p-106860_20	TTTGAATATCAGAACACTTGG	down	-inf	-inf	0.42265	1.90268	0	0	0	5.70805	0	0	0	0	0	5	0	0	0	low
405	PC-5p-119436_17	AAAAACTAACTCGGTCTTTCG	down	-inf	-inf	0.42265	6.46912	0	0	0	19.4074	0	0	0	0	0	17	0	0	0	middle
406	PC-3p-324268_5	AAAGTTTATTCATTTGCCCT	down	-inf	-inf	0.42265	3.80537	0	0	0	11.4161	0	0	0	0	0	10	0	0	0	middle
407	PC-3p-128080_15	AAAGCATTGATGGATGGTTGGATC	down	-inf	-inf	0.42265	0.799223	0	0	2.39767	0	0	0	0	0	7	0	0	0	0	low
408	PC-5p-156337_11	ATTATAAATGTATTGGGATCCACT	down	-inf	-inf	0.42265	1.09395	0	3.28185	0	0	0	0	0	6	0	0	0	0	0	low
409	PC-3p-13742_213	CCTCTGTATTCCTCCTCCAC	up	inf	inf	0.42265	0	1.78077	0	0	0	0	0	5.3423	0	0	0	0	0	4	middle
410	PC-3p-195514_8	TTATGACAGAACAACCTCATC	down	-inf	-inf	0.42265	3.04429	0	0	0	9.13288	0	0	0	0	0	8	0	0	0	low
411	PC-3p-146243_13	ATCGTTGTTCAGGATAGCGGCATC	down	-inf	-inf	0.42265	1.4586	0	4.3758	0	0	0	0	0	8	0	0	0	0	0	low
412	PC-5p-172612_10	TTGTCCAGCCCTCAGTTCACG	down	-inf	-inf	0.42265	0.570873	0	0	1.71262	0	0	0	0	0	5	0	0	0	0	low
413	PC-3p-159145_11	CTGGAAATCTCTCAACTCAATAGT	down	-inf	-inf	0.42265	1.09395	0	3.28185	0	0	0	0	0	6	0	0	0	0	0	low
414	PC-3p-193555_8	ATGGACAAAACACATTCAACTT	down	-inf	-inf	0.42265	3.04429	0	0	0	9.13288	0	0	0	0	0	8	0	0	0	low
415	PC-3p-129133_15	GAAAATGATCCAAGAGAAT	down	-inf	-inf	0.42265	5.70805	0	0	0	17.1241	0	0	0	0	0	15	0	0	0	middle
416	PC-5p-107548_20	TTAGTTTCGACTCACGATTTGA	down	-inf	-inf	0.42265	1.02757	0	0	3.08272	0	0	0	0	0	9	0	0	0	0	low
417	PC-5p-167790_10	ACTTCACTTTCCGTCTGACGAATT	down	-inf	-inf	0.42265	0.570873	0	0	1.71262	0	0	0	0	0	5	0	0	0	0	low
418	PC-3p-155359_12	ATGGACCAATCATGTGAGAGAGTT	down	-inf	-inf	0.42265	0.911625	0	2.73488	0	0	0	0	0	5	0	0	0	0	0	low
419	PC-5p-93296_24	TTGGATAACTACGTGGGATCT	down	-inf	-inf	0.42265	0.911625	0	2.73488	0	0	0	0	0	5	0	0	0	0	0	low
420	PC-5p-122679_16	CATGAGCATCGCCATTACCTGG	down	-inf	-inf	0.42265	1.71262	0	0	5.13786	0	0	0	0	0	15	0	0	0	0	low
421	PC-3p-304865_5	ATGTGACACCTAAAATAGTGAAGA	down	-inf	-inf	0.42265	3.80537	0	0	0	11.4161	0	0	0	0	0	10	0	0	0	middle
422	PC-5p-129182_15	ATAAATGCATTGGAACCCACTTCT	down	-inf	-inf	0.42265	0.911625	0	2.73488	0	0	0	0	0	5	0	0	0	0	0	low
423	PC-5p-225396_6	ACATTATAAATACATTGGGGCTCA	down	-inf	-inf	0.42265	0.685048	0	0	2.05514	0	0	0	0	0	6	0	0	0	0	low
424	PC-3p-3483_850	TTGTTTCTCCACCATGGCTTCC	down	-inf	-inf	0.42265	0.627961	0	0	1.88388	0	0	0	0	0	5.5	0	0	0	0	middle
425	PC-5p-114419_18	CTCTCCCTCAAATGCTTCAAA	down	-inf	-inf	0.42265	0.685048	0	0	2.05514	0	0	0	0	0	6	0	0	0	0	low
426	PC-3p-166557_10	TTAACGAGCCTTGGTAACTTT	down	-inf	-inf	0.42265	0.911625	0	2.73488	0	0	0	0	0	5	0	0	0	0	0	low
427	PC-3p-169317_10	CCAACAACGGCCTAGGCGAAGA	down	-inf	-inf	0.42265	0.911625	0	2.73488	0	0	0	0	0	5	0	0	0	0	0	low
428	PC-3p-268062_6	ATGAGATTGTGACACATAAGGTTA	down	-inf	-inf	0.42265	1.00279	0	3.00836	0	0	0	0	0	5.5	0	0	0	0	0	low
429	PC-5p-209357_7	TTTACATCTAATGATTGTCTTGC	down	-inf	-inf	0.42265	5.70805	0	0	0	17.1241	0	0	0	0	0	15	0	0	0	middle
430	PC-3p-72293_34	TAAGTGGTTCGCACGAGTTCGC	down	-inf	-inf	0.42265	0.913398	0	0	2.74019	0	0	0	0	0	8	0	0	0	0	low
431	PC-5p-186477_8	AATGTAGAAAACCGCACTCAACT	down	-inf	-inf	0.42265	3.04429	0	0	0	9.13288	0	0	0	0	0	8	0	0	0	low
432	PC-3p-257844_6	GCCGGGTCTGGATTGGATC	down	-inf	-inf	0.42265	2.28322	0	0	0	6.84966	0	0	0	0	0	6	0	0	0	low
433	PC-5p-208600_7	ACATCTACTATCAAATCTACTACC	down	-inf	-inf	0.42265	4.56644	0	0	0	13.6993	0	0	0	0	0	12	0	0	0	middle
434	PC-5p-348179_5	ATAAATGCATTGGACTTCACTTCT	down	-inf	-inf	0.42265	1.90268	0	0	0	5.70805	0	0	0	0	0	5	0	0	0	low
435	PC-3p-67208_37	TAGGGGTAGGAAATGAGGTCT	down	-inf	-inf	0.42265	1.14175	0	0	3.42524	0	0	0	0	0	10	0	0	0	0	middle
436	PC-5p-87535_26	CAACTGCGGTCTTAGTTATATG	down	-inf	-inf	0.42265	0.342524	0	0	1.02757	0	0	0	0	0	3	0	0	0	0	low
437	PC-5p-118399_17	ATTGTCGGACGGTACTTCAAGTGC	down	-inf	-inf	0.42265	1.09395	0	3.28185	0	0	0	0	0	6	0	0	0	0	0	low
438	PC-5p-245638_6	CTTGTTTGGCACATGAATTTTGAA	down	-inf	-inf	0.42265	1.09395	0	3.28185	0	0	0	0	0	6	0	0	0	0	0	low
439	PC-5p-113779_18	ACTCCTGTGGATACGTGCTATACC	down	-inf	-inf	0.42265	1.4586	0	4.3758	0	0	0	0	0	8	0	0	0	0	0	low
440	PC-5p-28352_101	TATCAACTGAGGCCGCATTTT	down	-inf	-inf	0.42265	0.913398	0	0	2.74019	0	0	0	0	0	8	0	0	0	0	middle
441	PC-3p-51590_51	ATAGCGGGTTAAGTGGTTTTC	down	-inf	-inf	0.42265	0.913398	0	0	2.74019	0	0	0	0	0	8	0	0	0	0	middle
442	PC-3p-44517_61	TTTGCCCTTGGTACAATTTCA	down	-inf	-inf	0.42265	0.570873	0	0	1.71262	0	0	0	0	0	5	0	0	0	0	low
443	PC-5p-120927_17	TATCAGTGTATGGACAGCT	down	-inf	-inf	0.42265	4.56644	0	0	0	13.6993	0	0	0	0	0	12	0	0	0	middle
444	PC-3p-136125_14	AATGAGATTGTGTCATCTAAGGTT	down	-inf	-inf	0.42265	2.16932	0	0	6.50796	0	0	0	0	0	19	0	0	0	0	low
445	PC-5p-239615_6	GTGGCACCAGCAAGATTCACA	down	-inf	-inf	0.42265	2.28322	0	0	0	6.84966	0	0	0	0	0	6	0	0	0	low
446	PC-3p-197331_8	TTATTAGAATGTCTTGGTCCC	down	-inf	-inf	0.42265	3.04429	0	0	0	9.13288	0	0	0	0	0	8	0	0	0	low
447	PC-5p-143356_13	AAATGCGTTGGGACCCACTTCTCA	down	-inf	-inf	0.42265	1.4586	0	4.3758	0	0	0	0	0	8	0	0	0	0	0	low
448	PC-3p-115452_18	ATGGACCCAATCATCACTAAAAGA	down	-inf	-inf	0.42265	4.1859	0	0	0	12.5577	0	0	0	0	0	11	0	0	0	middle
449	PC-3p-178630_9	ATTGGCAACTGCGAGCTTAGT	down	-inf	-inf	0.42265	0.685048	0	0	2.05514	0	0	0	0	0	6	0	0	0	0	low
450	PC-3p-121847_17	ATGTGTAAGTAGTACAAAAGTAGT	down	-inf	-inf	0.42265	1.09395	0	3.28185	0	0	0	0	0	6	0	0	0	0	0	low
451	PC-3p-176144_10	ATCGGACGGAACAACATGTACTGT	down	-inf	-inf	0.42265	1.82325	0	5.46975	0	0	0	0	0	10	0	0	0	0	0	low
452	PC-5p-259655_6	TTGTTTGAAACAACTAGTGGA	down	-inf	-inf	0.42265	2.28322	0	0	0	6.84966	0	0	0	0	0	6	0	0	0	low
453	PC-3p-265141_6	AAATTGTTAGGACGGTGTATTATC	down	-inf	-inf	0.42265	2.28322	0	0	0	6.84966	0	0	0	0	0	6	0	0	0	low
454	PC-3p-143024_13	AATGAGATTGTGATACATAAGGTT	down	-inf	-inf	0.42265	0.546975	0	1.64093	0	0	0	0	0	3	0	0	0	0	0	low
455	PC-5p-88981_26	TGTGCAAACGCCTTAATTCGT	down	-inf	-inf	0.42265	0.951342	0	0	0	2.85402	0	0	0	0	0	2.5	0	0	0	low
456	PC-5p-120381_17	AAAAACTAACTCGGTCTTTCGAA	down	-inf	-inf	0.42265	3.80537	0	0	0	11.4161	0	0	0	0	0	10	0	0	0	middle
457	PC-3p-89042_25	CAAGTTATCCTTGGCTATGCTT	down	-inf	-inf	0.42265	0.570873	0	0	1.71262	0	0	0	0	0	5	0	0	0	0	middle
458	PC-5p-69667_35	AGAATCCCTTCGGTTCATGAAC	down	-inf	-inf	0.42265	1.59845	0	0	4.79534	0	0	0	0	0	14	0	0	0	0	middle
459	PC-3p-199956_8	CAATGACAAGTTAAATGGTTTG	down	-inf	-inf	0.42265	1.8268	0	0	5.48039	0	0	0	0	0	16	0	0	0	0	low
460	gma-MIR5368-p5_1ss2GA	CAAGGGACAGTCTCAGGT	down	0.219175	-2.18984	0.428366	2.68283	0.58801	0	1.19883	6.84966	0	1.76403	0	0	3.5	6	0	2.5	0	middle
461	vvi-miR3630-3p_L-1R-1_1ss20CT	TTGGGAATCTCTCTGATGTA	down	0.0428996	-4.54289	0.429293	35.6373	1.52883	0	1.88388	105.028	0	4.58648	0	0	5.5	92	0	6.5	0	middle
462	PC-5p-3989_733	TTCTGTTGATTGTCATCTAAAC	down	0.160137	-2.64262	0.435469	24.4179	3.91021	2.1879	4.28155	66.7842	0	7.05612	4.67451	4	12.5	58.5	0	10	3.5	middle
463	PC-3p-5405_547	TCAAGACTAAGACTCGGTC	up	1.49226	0.577494	0.437605	51.8836	77.4235	44.852	45.727	65.0718	122.11	30.6941	79.4666	82	133.5	57	27	43.5	59.5	middle
464	aof-miR159_L+1R-1_1ss21TC	CTTTGGATTGAAGGGAGCTCC	down	0.586194	-0.77055	0.438007	13.298	7.7952	10.666	22.9491	6.27885	0	12.701	10.6846	19.5	67	5.5	0	18	8	middle
465	ath-miR159c_R-1_1ss6AG	TTTGGGTTGAAGGGAGCTCC	up	2.07208	1.05108	0.440836	1.54047	3.19199	1.36744	3.25398	0	0	4.23367	5.3423	2.5	9.5	0	0	6	4	low
466	gma-MIR5368-p3_1ss17CT	GAATTCTAACCTTGTGTCAGGA	down	0.0482879	-4.37219	0.441737	12.1772	0.58801	0	0	36.5315	0	1.76403	0	0	0	32	0	2.5	0	middle
467	gma-MIR5368-p5_1ss17CT	GAATTCTAACCTTGTGTCAGGA	down	0.0482879	-4.37219	0.441737	12.1772	0.58801	0	0	36.5315	0	1.76403	0	0	0	32	0	2.5	0	middle
468	osa-miR5083_L+3	TACAGACTACAATTATCTGATCA	down	0.0955464	-3.38765	0.442632	86.8591	8.29908	3.82883	4.45281	252.296	0	3.52806	21.3692	7	13	221	0	5	16	middle
469	aof-miR159_R+1	TTTGGATTGAAGGGAGCTCTAA	down	0.684095	-0.547731	0.446248	455.469	311.584	554.359	643.089	168.958	359.546	415.606	159.601	1013.5	1877.5	148	79.5	589	119.5	high
470	gma-miR6300_L-1R+6	TCGTTGTAGTATAGTGGTGAGTA	down	0.0818604	-3.61069	0.446782	183.121	14.9904	7.38416	0.85631	541.123	24.8742	7.40893	12.688	13.5	2.5	474	5.5	10.5	9.5	high
471	vvi-miR3630-3p_L-2R-1_1ss20CT	TGGGAATCTCTCTGATGTA	down	0.0961019	-3.37929	0.453855	503.987	48.4341	12.8539	7.02174	1492.08	76.884	43.0423	25.3759	23.5	20.5	1307	17	61	19	high
472	vvi-miR3630-3p_L-2	TGGGAATCTCTCTGATGCAC	down	0.135438	-2.8843	0.464991	206.866	28.0175	8.7516	5.65165	606.195	47.4872	21.874	14.6913	16	16.5	531	10.5	31	11	high
473	PC-5p-4996_590	TCACTCTTTGAATTCTCAACT	down	0.395228	-1.33924	0.471322	35.1244	13.8822	11.76	10.2757	83.3375	15.8291	14.465	11.3524	21.5	30	73	3.5	20.5	8.5	middle
474	PC-3p-29862_95	TGAATGACCTTTAAACAACT	down	0.122432	-3.02995	0.473251	32.7262	4.00672	0	0	98.1785	0	0	12.0202	0	0	86	0	0	9	middle
475	ath-miR8175_L-2	TCCCCGGCAACGGCGCCA	up	1.44384	0.529912	0.473413	397.707	574.226	196.911	343.209	653.001	655.775	830.505	236.397	360	1002	572	145	1177	177	high
476	gma-miR319a_R+1	TTGGACTGAAGGGAGCTCCCA	down	0.291419	-1.77883	0.479119	49.015	14.2839	9.61765	129.246	8.18154	13.1909	26.9897	2.67115	17.5833	377.333	7.16667	2.91667	38.25	2	middle
477	aly-miR319a-3p_1ss21TA	TTGGACTGAAGGGAGCTCCCA	down	0.291419	-1.77883	0.479119	49.015	14.2839	9.61765	129.246	8.18154	13.1909	26.9897	2.67115	17.5833	377.333	7.16667	2.91667	38.25	2	middle
478	PC-3p-26371_109	ACAAGCCCGTCTAGCTCAGT	down	0.140415	-2.83224	0.480852	27.3986	3.84717	0	0	82.1959	0	3.52806	8.01344	0	0	72	0	5	6	middle
479	aof-miR168a	TCGCTTGGTGCAGGTCGGGAA	down	0.570475	-0.809763	0.482154	1380.86	787.748	1467.26	2525.77	149.551	520.097	1115.93	727.22	2682.5	7374	131	115	1581.5	544.5	high
480	bdi-miR7782-3p_L-1R-5_1ss3CG	CGTGCTCTGATACCATGT	down	0.246859	-2.01824	0.485754	50.3702	12.4343	8.7516	3.08272	139.276	31.6581	5.6449	0	16	9	122	7	8	0	middle
481	aof-miR394_R-1	TTGGCATTCTGTCCACCTC	up	6.52345	2.70563	0.48727	0.342524	2.23444	0	1.02757	0	0	6.70331	0	0	3	0	0	9.5	0	low
482	aof-miR164_1ss20CT	TGGAGAAGCAGGGCACGTGTA	up	1.53888	0.62188	0.487691	13.7779	21.2026	22.1525	19.1813	0	15.8291	13.0538	34.7249	40.5	56	0	3.5	18.5	26	middle
483	vvi-miR3630-3p_L-3	GGGAATCTCTCTGATGCAC	down	0.186775	-2.42063	0.490542	212.259	39.6445	8.20463	4.11029	624.461	58.7936	38.1031	22.037	15	12	547	13	54	16.5	high
484	ath-miR828_2ss11AG17AG	TCTTGCTTAAGTGAGTGTTCCA	down	0.44688	-1.16204	0.492796	31.393	14.0289	72.2007	17.9825	3.99563	20.3516	13.0538	8.68123	132	52.5	3.5	4.5	18.5	6.5	middle
485	gma-MIR6300-p5_1ss18AG_2	CGTTGTAGTATAGTGGTGAGTATT	down	0.415036	-1.26869	0.492941	203.115	84.2998	61.5347	61.4831	486.326	151.507	72.678	28.7148	112.5	179.5	426	33.5	103	21.5	middle
486	gma-MIR6300-p5_1ss18AG_1	CGTTGTAGTATAGTGGTGAGTAT	down	0.415036	-1.26869	0.492941	203.115	84.2998	61.5347	61.4831	486.326	151.507	72.678	28.7148	112.5	179.5	426	33.5	103	21.5	middle
487	osa-MIR444c-p5_1ss1TC	CTGTCTCAAGCTTGCTGCCTCC	down	0.244181	-2.03398	0.498428	7.70591	1.88163	1.36744	21.7503	0	0	5.6449	0	2.5	63.5	0	0	8	0	middle
488	gma-miR6300_L-1R+7	TCGTTGTAGTATAGTGGTGAGTAT	down	0.223017	-2.16477	0.498486	171.048	38.1467	17.2297	1.02757	494.888	65.5775	20.8156	28.0471	31.5	3	433.5	14.5	29.5	21	high
489	ptc-MIR6438b-p5_2ss13TA17CT	TTCACTATTCTGAGCATA	down	0.180275	-2.47173	0.500005	4.56644	0.823214	0	0	13.6993	0	2.46964	0	0	0	12	0	3.5	0	middle
490	osa-miR5083_L-2	ACTACAATTATCTGATCA	down	0.208621	-2.26104	0.500266	99.0424	20.6623	6.01673	0	291.111	27.1355	14.8179	20.0336	11	0	255	6	21	15	middle
491	vvi-miR3630-3p_L-4	GGAATCTCTCTGATGCAC	down	0.195484	-2.35488	0.500527	359.387	70.2545	6.01673	3.5965	1068.55	88.1904	69.15	53.423	11	10.5	936	19.5	98	40	high
492	aof-miR167b_1ss22AT	TGAAGCTGCCAGCATGATCTGT	down	0.597922	-0.74197	0.501607	242.968	145.276	398.198	323.857	6.84966	171.858	134.419	129.551	728	945.5	6	38	190.5	97	middle
493	aof-miR167c_R+1_3	TGAAGCTGCCAGCATGATCTGT	down	0.597922	-0.74197	0.501607	242.968	145.276	398.198	323.857	6.84966	171.858	134.419	129.551	728	945.5	6	38	190.5	97	middle
494	ptc-miR6478_R-2_1ss19GA	CCGACCTTAGCTCAGTTGA	up	5.30141	2.40638	0.502873	1.22007	6.46811	2.46139	1.19883	0	0	19.4043	0	4.5	3.5	0	0	27.5	0	middle
495	aof-miR396b_2ss5AG21GA	TTCCGCAGCTTTCTTGAACTA	up	5.35609	2.42118	0.503107	0.285437	1.52883	0	0.85631	0	0	4.58648	0	0	2.5	0	0	6.5	0	low
496	osa-miR5072_L-4_1ss13GA	TCCCCAGCAGAGTCGCCA	up	1.29388	0.371699	0.506026	21.0798	27.2747	17.2297	24.3192	21.6906	38.442	30.6941	12.688	31.5	71	19	8.5	43.5	9.5	middle
497	ptc-miR6478_R-2_1ss10GA	CCGACCTTAACTCAGTTGG	up	5.08669	2.34673	0.506468	1.71085	8.70255	2.73488	2.39767	0	0	26.1076	0	5	7	0	0	37	0	middle
498	gma-miR6300_R+6	GTCGTTGTAGTATAGTGGTGAGTA	down	0.897509	-0.156002	0.509385	44.3173	39.7752	47.0399	48.8097	37.1023	49.7484	33.5166	36.0605	86	142.5	32.5	11	47.5	27	middle
499	cme-MIR160c-p5_2ss13AG17AG	AGCCATGCATGTGTAAGT	down	0.367622	-1.4437	0.510209	16.1585	5.94022	4.92278	1.88388	41.6688	11.3065	3.17525	3.33893	9	5.5	36.5	2.5	4.5	2.5	middle
500	osa-MIR5083-p5_1ss18GT	TGGATCCTTCTGAGCCTT	down	0.307362	-1.70199	0.510753	16.088	4.94484	1.91441	2.39767	43.952	11.3065	3.52806	0	3.5	7	38.5	2.5	5	0	middle
501	PC-3p-31659_90	CCCAACTACCAGAACTTCTCA	down	0.491009	-1.02618	0.510902	4.3112	2.11684	7.11068	5.82291	0	0	6.35051	0	13	17	0	0	9	0	middle
502	mtr-MIR2603-p3_2ss9AC17AC	GTCCCTGCCCTTTGTACA	down	0.494024	-1.01735	0.512386	2.70346	1.33557	3.82883	4.28155	0	0	0	4.00672	7	12.5	0	0	0	3	low
503	gma-miR6300_R+1_1	GTCGTTGTAGTATAGTGGA	up	2.03421	1.02447	0.515002	4.33864	8.82571	0	13.0159	0	11.3065	15.1707	0	0	38	0	2.5	21.5	0	middle
504	gma-miR6300_R+1_3	GTCGTTGTAGTATAGTGGT	up	2.03421	1.02447	0.515002	4.33864	8.82571	0	13.0159	0	11.3065	15.1707	0	0	38	0	2.5	21.5	0	middle
505	gma-miR6300_R+1_2	GTCGTTGTAGTATAGTGGC	up	2.03421	1.02447	0.515002	4.33864	8.82571	0	13.0159	0	11.3065	15.1707	0	0	38	0	2.5	21.5	0	middle
506	aof-MIR396b-p5	TATTTTTCCACAGCTTTCTTG	down	0.675537	-0.565892	0.517068	76.045	51.3713	60.7142	30.9984	136.422	54.271	62.4467	37.3961	111	90.5	119.5	12	88.5	28	middle
507	aof-miR394_1ss20CA	TTGGCATTCTGTCCACCTCA	up	4.53208	2.18017	0.519936	0.285437	1.29362	0	0.85631	0	0	3.88087	0	0	2.5	0	0	5.5	0	low
508	cca-miR396a-5p_R+1	TTCCACAGCTTTCTTGAACTTT	down	0.55946	-0.837893	0.521941	40.3631	22.5816	32.2715	5.48039	83.3375	31.6581	25.402	10.6846	59	16	73	7	36	8	middle
509	PC-5p-17451_168	CAGAAGATTATCATTCGTCCGA	down	0.553879	-0.852357	0.521996	7.41604	4.10759	8.20463	14.0435	0	0	5.6449	6.67787	15	41	0	0	8	5	middle
510	csi-MIR390b-p3_2ss17TC18TA	CGCTATCTATCCTGAGCATT	down	0.234446	-2.09267	0.526995	5.51778	1.29362	0	0	16.5533	0	3.88087	0	0	0	14.5	0	5.5	0	middle
511	vvi-miR3630-3p_L-3_1ss22CT	GGGAATCTCTCTGATGCAT	down	0.289994	-1.7859	0.532471	183.175	53.1198	12.8539	5.82291	530.849	65.5775	49.04	44.7417	23.5	17	465	14.5	69.5	33.5	middle
512	osa-MIR2118e-p3_1ss13TA	GAAAAGAGAGTCAAAGAG	down	0.495239	-1.0138	0.539331	4.14707	2.05379	1.36744	1.3701	9.70368	0	2.82245	3.33893	2.5	4	8.5	0	4	2.5	low
513	PC-5p-791_3683	GTTTCTCCCAATCACTTCAGT	up	3.77249	1.91552	0.543124	1.19883	4.52259	0	3.5965	0	13.5678	0	0	0	10.5	0	3	0	0	high
514	gma-MIR6300-p5_1ss10AG	TATAGTGGTGAGTATTCCCGCC	down	0.269723	-1.89045	0.543802	45.6644	12.3167	0	0	136.993	31.6581	5.29209	0	0	0	120	7	7.5	0	middle
515	gma-MIR6300-p3_1ss10AG	TATAGTGGTGAGTATTCCCGCC	down	0.269723	-1.89045	0.543802	45.6644	12.3167	0	0	136.993	31.6581	5.29209	0	0	0	120	7	7.5	0	middle
516	sbi-MIR156f-p3	TTGCGTGCTCACTTCTCTTTCTG	down	0.54949	-0.863834	0.544648	13.4449	7.38784	5.74324	5.48039	29.1111	0	14.8179	7.34566	10.5	16	25.5	0	21	5.5	middle
517	vvi-miR3630-3p_L-2_1ss22CT	TGGGAATCTCTCTGATGCAT	down	0.300297	-1.73554	0.544765	271.041	81.3929	12.8539	5.13786	795.131	122.11	65.9747	56.0941	23.5	15	696.5	27	93.5	42	high
518	ptc-miR6478_R-3	CCGACCTTAGCTCAGTTG	down	0.493366	-1.01927	0.547943	67.7739	33.4374	19.6911	22.0928	161.538	20.3516	65.2691	14.6913	36	64.5	141.5	4.5	92.5	11	middle
519	gma-miR6300_1ss6TG	GTCGTGGTAGTATAGTGG	down	0.527118	-0.923802	0.551112	7.58553	3.99847	10.9395	11.8171	0	0	11.9954	0	20	34.5	0	0	17	0	middle
520	PC-3p-24138_120	TGCTTTTTCTTAATTCCATGC	down	0.419579	-1.25298	0.552663	7.28742	3.05765	0	3.5965	18.2658	0	9.17296	0	0	10.5	16	0	13	0	middle
521	ptc-miR6478_R-2_1ss19GC	CCGACCTTAGCTCAGTTGC	up	3.44007	1.78244	0.557096	0.546975	1.88163	1.64093	0	0	0	5.6449	0	3	0	0	0	8	0	low
522	PC-5p-5208_568	TTCACAACTGCGGTCTTAGTT	up	1.56318	0.644488	0.558117	17.0559	26.6615	19.1441	11.4746	20.549	0	34.575	45.4095	35	33.5	18	0	49	34	middle
523	gma-MIR6300-p3_1ss12AG	AGTATAGTGGTGAGTATTCCCG	down	0.443944	-1.17155	0.559524	13.5226	6.00326	3.00836	2.74019	34.8191	11.3065	6.70331	0	5.5	8	30.5	2.5	9.5	0	middle
524	ppe-miR1511-3p_L+1R-4	AACCTGGCTCTGATACCA	down	0.476415	-1.06971	0.559795	46.3748	22.0937	13.1274	11.0749	114.922	43.7183	18.1107	4.45191	24	32.3333	100.667	9.66667	25.6667	3.33333	middle
525	aof-miR5139a_L-2	AACCTGGCTCTGATACCA	down	0.476415	-1.06971	0.559795	46.3748	22.0937	13.1274	11.0749	114.922	43.7183	18.1107	4.45191	24	32.3333	100.667	9.66667	25.6667	3.33333	middle
526	aof-miR5139b_L-3	AACCTGGCTCTGATACCA	down	0.476415	-1.06971	0.559795	46.3748	22.0937	13.1274	11.0749	114.922	43.7183	18.1107	4.45191	24	32.3333	100.667	9.66667	25.6667	3.33333	middle
527	aof-miR171b_L-1R+2_1ss9CG	TGAGCCGGGCCAATATCACTCC	down	0.712475	-0.489089	0.562681	570.342	406.354	912.902	684.534	113.59	343.717	458.648	416.699	1669	1998.5	99.5	76	650	312	high
528	osa-miR159d_R-1_1ss1AG	GTTGGATTGAAGGGAGCTCC	up	1.60122	0.679172	0.567159	4.57451	7.32479	6.01673	7.70679	0	0	11.2898	10.6846	11	22.5	0	0	16	8	middle
529	lja-miR477-5p_R-1_1ss1AG	GCTCTCCCTCAAGGGCTTCTG	up	3.2372	1.69475	0.567299	1.59845	5.17449	0	4.79534	0	0	15.5235	0	0	14	0	0	22	0	middle
530	gma-MIR9733-p5_2ss3TC19GA	GTCAAGTGATGTTGGGACA	up	3.04729	1.60753	0.574012	1.23678	3.76882	0	0.85631	2.85402	11.3065	0	0	0	2.5	2.5	2.5	0	0	middle
531	PC-5p-60095_42	AATGGATGATGTGACATATATGTG	down	0.5152	-0.956796	0.57842	4.32057	2.22596	3.82883	0	9.13288	0	0	6.67787	7	0	8	0	0	5	middle
532	osa-MIR5083-p5_1ss19GT	ATGGATCCTTCTGAGCCTT	down	0.55093	-0.860059	0.578776	29.4631	16.2321	9.84555	8.90563	69.6382	13.5678	13.7594	21.3692	18	26	61	3	19.5	16	middle
533	osa-MIR5083-p3_1ss19GT	ATGGATCCTTCTGAGCCTT	down	0.55093	-0.860059	0.578776	29.4631	16.2321	9.84555	8.90563	69.6382	13.5678	13.7594	21.3692	18	26	61	3	19.5	16	middle
534	PC-3p-67585_37	GCAAGTTTCCCTGGCTAGGC	down	0.332264	-1.5896	0.580693	3.53942	1.17602	0	10.6182	0	0	3.52806	0	0	31	0	0	5	0	middle
535	aof-miR167b_1ss2GN	TNAAGCTGCCAGCATGATCTGA	up	1.77337	0.826491	0.582903	9.53976	16.9175	25.7078	2.91145	0	0	18.6987	32.0538	47	8.5	0	0	26.5	24	middle
536	aof-miR156c	TGACAGAAGAGAGAGAGCAC	up	2.85276	1.51236	0.585319	1.07182	3.05765	2.1879	1.02757	0	0	9.17296	0	4	3	0	0	13	0	middle
537	aof-miR477b_L-1_1ss21CT	TCTCTCTCCCTCAAAGGCTTT	up	2.93188	1.55182	0.585838	1.00279	2.94005	3.00836	0	0	0	8.82015	0	5.5	0	0	0	12.5	0	low
538	peu-MIR2916-p3_1ss7TC	AGGGATCGGCGGATGTTGCT	up	1.50687	0.591555	0.587	7762.74	11697.4	16258.8	2289.43	4739.96	16267.7	1563.64	17261	29725	6684	4152	3597	2216	12924	high
539	aof-miR827_R-1	TTAGATGACCATCAACAAAC	down	0.595315	-0.748274	0.58958	11.0483	6.57723	4.3758	4.79534	23.9738	0	13.0538	6.67787	8	14	21	0	18.5	5	middle
540	aof-miR393b_L+1R-1	TTCCAAAGGGATCGCATTGATC	up	1.15578	0.208861	0.591381	28.6466	33.1091	21.6055	39.219	25.1154	24.8742	31.0469	43.4061	39.5	114.5	22	5.5	44	32.5	high
541	aof-miR477a_1ss20CT	ACTCTCCCTCAAGGGCTTCTG	up	1.81246	0.85795	0.594689	2.43086	4.40583	1.64093	5.65165	0	0	9.87857	3.33893	3	16.5	0	0	14	2.5	low
542	lja-miR477-5p_R-1	ACTCTCCCTCAAGGGCTTCTG	up	1.81246	0.85795	0.594689	2.43086	4.40583	1.64093	5.65165	0	0	9.87857	3.33893	3	16.5	0	0	14	2.5	low
543	gma-MIR6300-p3_1ss6AG	GTGGTGAGTATTCCCGCC	up	1.80768	0.85414	0.603344	8.39332	15.1724	2.46139	4.45281	18.2658	36.1807	5.9977	3.33893	4.5	13	16	8	8.5	2.5	middle
544	PC-3p-13000_225	CAAGCCTTCACTTTGCACATC	down	0.68591	-0.543909	0.609321	11.1216	7.62839	3.28185	11.8171	18.2658	15.8291	7.05612	0	6	34.5	16	3.5	10	0	middle
545	gma-MIR5368-p3_1ss12CT	CTAACCTTGTGTCAGGACCT	up	1.7057	0.770361	0.611048	7.54726	12.8733	4.3758	1.71262	16.5533	29.3968	3.88087	5.3423	8	5	14.5	6.5	5.5	4	middle
546	bdi-MIR7765-p3_2ss13GA17TG	TTGTGAGGTGGAACATGT	down	0.435708	-1.19857	0.614002	26.5678	11.5758	2.1879	1.02757	76.4879	24.8742	3.17525	6.67787	4	3	67	5.5	4.5	5	middle
547	bdi-MIR7765-p5_2ss13GA17TG	TTGTGAGGTGGAACATGT	down	0.435708	-1.19857	0.614002	26.5678	11.5758	2.1879	1.02757	76.4879	24.8742	3.17525	6.67787	4	3	67	5.5	4.5	5	middle
548	osa-miR156f-3p_2ss13TA14TC	GCTCACTTCTCTACCTGTCAGC	down	0.39734	-1.33155	0.619761	2.66376	1.05842	0	0	7.99127	0	3.17525	0	0	0	7	0	4.5	0	middle
549	ptc-miR6478_L-1R-2	CGACCTTAGCTCAGTTGG	down	0.731373	-0.45132	0.620256	15.9646	11.6761	18.3237	19.8664	9.70368	0	24.3436	10.6846	33.5	58	8.5	0	34.5	8	middle
550	gma-miR6300_1ss3CT	GTTGTTGTAGTATAGTGG	down	0.545888	-0.873324	0.620453	6.90402	3.76882	5.46975	15.2423	0	11.3065	0	0	10	44.5	0	2.5	0	0	middle
551	gma-miR390b-5p	AAGCTCAGGAGGGATAGCACC	down	0.573935	-0.80104	0.62395	39.4917	22.6657	13.6744	8.90563	95.8952	31.6581	36.339	0	25	26	84	7	51.5	0	middle
552	aof-MIR159-p5_2ss1TC19TA	CTGCATGACTCAGGAGCTACAT	up	2.44174	1.28791	0.627347	0.911625	2.22596	2.73488	0	0	0	0	6.67787	5	0	0	0	0	5	low
553	ptc-miR159d_L+1R-1	TCTTGGATTGAAGGGAGCTCC	up	2.44174	1.28791	0.627347	0.911625	2.22596	2.73488	0	0	0	0	6.67787	5	0	0	0	0	5	low
554	PC-3p-127093_16	TGCAATTGGGAACTGCGAGTT	up	2.44174	1.28791	0.627347	1.4586	3.56153	4.3758	0	0	0	0	10.6846	8	0	0	0	0	8	middle
555	PC-5p-166_19100	GTTTCTCCCAACCACTTCAGT	up	2.11965	1.08383	0.629038	4.60018	9.75078	1.64093	12.1596	0	27.1355	2.11684	0	3	35.5	0	6	3	0	high
556	nta-MIR172f-p5_2ss15CG19TA	ATTGGAACGATACAGAGAA	up	1.52599	0.609748	0.630418	29.9601	45.7189	5.74324	3.08272	81.0543	70.1001	17.6403	49.4162	10.5	9	71	15.5	25	37	middle
557	cas-MIR5139-p3_2ss16GC17AG	ACTCTGATGGAGGCTCGT	up	1.50057	0.58551	0.630566	11.1782	16.7736	3.28185	0	30.2527	18.0903	9.52576	22.7048	6	0	26.5	4	13.5	17	middle
558	PC-5p-12330_236	TCACTCTTTAAATTCTCAACT	down	0.567622	-0.816997	0.636405	15.1859	8.61985	2.46139	4.28155	38.8147	11.3065	9.87857	4.67451	4.5	12.5	34	2.5	14	3.5	middle
559	gma-miR6300_1ss18GC	GTCGTTGTAGTATAGTGC	up	1.53329	0.616626	0.637062	16.7345	25.6588	22.973	27.2307	0	54.271	18.6987	4.00672	42	79.5	0	12	26.5	3	middle
560	osa-MIR444b-p5	TGTCTCAAGCTTGCTGCCTCC	down	0.601567	-0.733204	0.63799	788.166	474.134	377.413	1888.34	98.7493	330.149	861.2	231.054	690	5513	86.5	73	1220.5	173	high
561	osa-MIR444b-p3	TGTCTCAAGCTTGCTGCCTCC	down	0.601567	-0.733204	0.63799	788.166	474.134	377.413	1888.34	98.7493	330.149	861.2	231.054	690	5513	86.5	73	1220.5	173	high
562	aof-miR166a_L-2R+1	TCGGACCAGGCTTCATTCCT	down	0.587219	-0.76803	0.640335	69.256	40.6684	22.426	13.5297	171.812	72.3614	22.9324	26.7115	41	39.5	150.5	16	32.5	20	middle
563	PC-3p-182_17973	TTGCGTAGGCTGTAATGTGGC	down	0.914438	-0.129043	0.645142	497.061	454.532	456.724	389.45	645.01	416.078	434.657	512.86	835	1137	565	92	616	384	high
564	osa-miR5072_L-4	TCCCCAGCGGAGTCGCCA	down	0.869322	-0.202038	0.650678	67.6696	58.8266	50.5952	71.9301	80.4835	83.6678	62.0939	30.7182	92.5	210	70.5	18.5	88	23	middle
565	aof-miR166a_L-1	CTCGGACCAGGCTTCATTCC	up	1.34253	0.424955	0.650705	26.2193	35.2002	19.6911	22.4353	36.5315	67.8388	13.0538	24.7081	36	65.5	32	15	18.5	18.5	middle
566	aof-miR167b_L-1R+1	GAAGCTGCCAGCATGATCTGAT	up	1.55761	0.639332	0.651933	11.8427	18.4463	30.9041	4.62408	0	0	23.2852	32.0538	56.5	13.5	0	0	33	24	middle
567	mdm-miR169o_1ss20TA	TAGCCAGGGATGACTTGCCA	up	1.62947	0.704401	0.652778	1.54136	2.51159	0	4.62408	0	0	3.52806	4.00672	0	13.5	0	0	5	3	low
568	osa-MIR444d-p3	TGCCTCAAGCTTGCTGCCTCC	up	1.29772	0.375985	0.65325	65.7625	85.3417	73.2947	117.143	6.84966	40.7033	123.835	91.4868	134	342	6	9	175.5	68.5	middle
569	ptc-MIR6438b-p3_2ss15TA19CT	ATTTCACTATTCTGAGCAT	up	1.47308	0.558839	0.660822	38.3741	56.5283	5.46975	8.04932	101.603	92.713	20.1099	56.7619	10	23.5	89	20.5	28.5	42.5	middle
570	ptc-MIR6438b-p5_2ss15TA19CT	ATTTCACTATTCTGAGCAT	up	1.47308	0.558839	0.660822	38.3741	56.5283	5.46975	8.04932	101.603	92.713	20.1099	56.7619	10	23.5	89	20.5	28.5	42.5	middle
571	gma-MIR5368-p5_1ss14CA	ATACCACTCTGGAAGAGCTAG	down	0.471227	-1.08551	0.661066	10.8453	5.1106	0	0	32.5359	13.5678	1.76403	0	0	0	28.5	3	2.5	0	middle
572	aof-miR166a_L-2R+2_1ss19TC	TCGGACCAGGCTTCATCCCCC	up	1.36799	0.452057	0.661426	417.048	570.517	954.472	212.194	84.4791	230.652	711.61	769.291	1745	619.5	74	51	1008.5	576	high
573	aof-miR166a_L-2R+2_1ss18TA	TCGGACCAGGCTTCAATCCCC	down	0.640092	-0.643648	0.662065	31.7844	20.3449	72.7477	12.3309	10.2745	0	42.3367	18.698	133	36	9	0	60	14	middle
574	gma-miR6300_L-1R+4	TCGTTGTAGTATAGTGGTGAG	down	0.59888	-0.739661	0.665358	77.7322	46.5522	13.9479	20.0377	199.211	81.4066	40.2199	18.0302	25.5	58.5	174.5	18	57	13.5	middle
575	PC-3p-79639_30	CATCTAATACAACAAAGTCGA	down	0.644387	-0.634002	0.686644	1.82502	1.17602	2.73488	2.74019	0	0	3.52806	0	5	8	0	0	5	0	low
576	gma-miR6300_1ss15GT	GTCGTTGTAGTATATTGG	down	0.707423	-0.499356	0.691807	10.3828	7.34503	10.9395	20.2089	0	13.5678	8.46734	0	20	59	0	3	12	0	middle
577	vca-MIR391-p5_2ss1TC20CT	CTCGCAGGAGAGATGATGCT	down	0.535553	-0.900898	0.697647	7.99127	4.27975	0	0	23.9738	0	2.82245	10.0168	0	0	21	0	4	7.5	middle
578	peu-MIR2916-p5_1ss6AG	ATACCGTCCTAGTCTCAACCATA	up	1.24585	0.317129	0.705586	8358.86	10413.9	10964.1	1845.86	12266.6	15688.9	2927.58	12625.2	20045	5389	10745	3469	4149	9453	high
579	vvi-MIR169x-p5_2ss14GC20GA	TTATCCACAAAGCCATTCCA	up	1.77604	0.828664	0.71234	1.6554	2.94005	0	1.54136	3.42483	0	8.82015	0	0	4.5	3	0	12.5	0	low
580	aof-miR160c_R-3	TGCCTGGCTCCCTGTATG	down	0.633916	-0.657637	0.714713	2.96827	1.88163	0	2.05514	6.84966	0	5.6449	0	0	6	6	0	8	0	low
581	PC-5p-26910_106	CTCGCAGGAGAGATGATGTCGCG	up	1.25614	0.328997	0.715728	6.9558	8.73745	13.6744	7.19301	0	11.3065	10.2314	4.67451	25	21	0	2.5	14.5	3.5	middle
582	osa-miR396a-3p_L-1R+1	TTCAATAAAGCTGTGGGAAA	down	0.83382	-0.262193	0.717784	148.701	123.989	154.794	217.674	73.6338	58.7936	217.681	95.4935	283	635.5	64.5	13	308.5	71.5	middle
583	gma-miR6300	GTCGTTGTAGTATAGTGG	down	0.801683	-0.318896	0.720973	1293.8	1037.22	1486.41	2049.66	345.337	1867.83	885.896	357.934	2717.5	5984	302.5	413	1255.5	268	high
584	stu-miR391-5p_2ss1TC2AT	CTCGCAGGAGAGATGATGCTG	down	0.934477	-0.0977696	0.721605	15.7188	14.6888	15.5888	17.2975	14.2701	11.3065	19.4043	13.3557	28.5	50.5	12.5	2.5	27.5	10	middle
585	PC-3p-25651_112	TTGAGAATAACGATCTAGGTT	down	0.625283	-0.677419	0.728389	4.51387	2.82245	11.4865	2.05514	0	0	8.46734	0	21	6	0	0	12	0	middle
586	ppe-MIR399f-p5_2ss6TA18CT	AAATGAACAATCACTTTT	up	1.26689	0.341288	0.730033	18.3729	23.2764	5.74324	7.70679	41.6688	33.9194	15.8763	20.0336	10.5	22.5	36.5	7.5	22.5	15	middle
587	ppe-MIR399j-p5_2ss6CA18CT	AAATGAACAATCACTTTT	up	1.26689	0.341288	0.730033	18.3729	23.2764	5.74324	7.70679	41.6688	33.9194	15.8763	20.0336	10.5	22.5	36.5	7.5	22.5	15	middle
588	gma-MIR6300-p5_1ss15AG	TGTAGTATAGTGGTGAGTATT	down	0.658074	-0.603678	0.735459	140.119	92.2084	18.0502	16.4412	385.864	117.587	101.608	57.4297	33	48	338	26	144	43	middle
589	mtr-MIR2676f-p5_2ss2AT19GA	TTGGAAAATGTTTTGAGGAAA	down	0.687469	-0.540633	0.73732	3.07917	2.11684	5.46975	3.76777	0	0	6.35051	0	10	11	0	0	9	0	middle
590	ptc-miR6478_R-1_1ss20TA	CCGACCTTAGCTCAGTTGGA	up	1.36016	0.443778	0.743094	12.2544	16.668	0	28.772	7.99127	31.6581	18.3459	0	0	84	7	7	26	0	middle
591	aof-miR827	TTAGATGACCATCAACAAACA	down	0.84993	-0.234585	0.751081	54.2746	46.1296	29.5367	35.1087	98.1785	54.271	49.3928	34.7249	54	102.5	86	12	70	26	high
592	ath-miR159c_R-1_1ss5GT	TTTGTATTGAAGGGAGCTCC	up	1.2896	0.366929	0.751439	2.29278	2.95679	3.28185	3.5965	0	0	3.52806	5.3423	6	10.5	0	0	5	4	low
593	osa-miR5077_L-1_1ss5GA	TTCACGTCGGGTTCACCA	down	0.795228	-0.330559	0.75397	513.035	407.98	194.997	282.411	1061.7	486.178	582.836	154.927	356.5	824.5	930	107.5	826	116	high
594	osa-miR5072_L-3_1ss4TA	ATCCCCAGCGGAGTCGCCA	up	1.19071	0.251824	0.756539	8.23019	9.79979	8.47812	13.3584	2.85402	15.8291	10.2314	3.33893	15.5	39	2.5	3.5	14.5	2.5	middle
595	osa-miR156c-3p_L+3R-3_1ss16CT	CGTGCTCACTTCTCTTTCTGTC	up	1.62247	0.698195	0.763446	1.52215	2.46964	0	0	4.56644	0	7.40893	0	0	0	4	0	10.5	0	low
596	osa-miR156a_L+1R-2	CTGACAGAAGAGAGTGAGC	down	0.618085	-0.694123	0.764618	0.951342	0.58801	0	0	2.85402	0	1.76403	0	0	0	2.5	0	2.5	0	low
597	sly-MIR9477-p3_2ss10CG17GC	GGTGATATTGTAGGTTCG	down	0.618085	-0.694123	0.764618	1.71241	1.05842	0	0	5.13724	0	3.17525	0	0	0	4.5	0	4.5	0	low
598	PC-5p-173172_10	TTTTTGTTTTCGATTGTGAGT	down	0.618085	-0.694123	0.764618	1.90268	1.17602	0	0	5.70805	0	3.52806	0	0	0	5	0	5	0	low
599	gma-miR6300_L-1R+5	TCGTTGTAGTATAGTGGTGAGT	down	0.724104	-0.465732	0.777085	143.083	103.607	24.8874	18.4963	385.864	126.632	116.073	68.1143	45.5	54	338	28	164.5	51	high
600	aof-miR166a_L-2	TCGGACCAGGCTTCATTCC	down	0.83523	-0.259755	0.777491	116.931	97.6645	77.944	42.8155	230.034	99.4969	59.2714	134.225	142.5	125	201.5	22	84	100.5	middle
601	PC-5p-72810_33	AATCTTAGGTGACGCAATCTCATT	down	0.736544	-0.441157	0.785601	1.59667	1.17602	2.73488	2.05514	0	0	3.52806	0	5	6	0	0	5	0	low
602	osa-miR393b-3p_R+1_2ss4G-8AT	TCATGCTATCCCTTTGGAATT	down	0.738308	-0.437705	0.787201	4.22092	3.11634	5.46975	7.19301	0	0	0	9.34902	10	21	0	0	0	7	middle
603	aof-miR396b	TTCCACAGCTTTCTTGAACTG	down	0.853029	-0.229333	0.788764	1689.89	1441.53	924.388	858.023	3287.27	1842.95	1173.43	1308.19	1690	2505	2879.5	407.5	1663	979.5	high
604	mtr-miR169d-5p_L+1R-1_1ss7AG	GAAGCCGAGGATGACTTGCCG	up	1.51792	0.602097	0.791917	1.08466	1.64643	0	3.25398	0	0	4.93928	0	0	9.5	0	0	7	0	low
605	osa-miR156a_L+1R-1	CTGACAGAAGAGAGTGAGCA	down	0.659291	-0.601013	0.792248	2.85402	1.88163	0	0	8.56207	0	5.6449	0	0	0	7.5	0	8	0	low
606	osa-miR156a_L+1_1ss9AC	CTGACAGACGAGAGTGAGCAC	down	0.66563	-0.587207	0.79648	2.47349	1.64643	0	0	7.42046	0	4.93928	0	0	0	6.5	0	7	0	low
607	aof-miR171c_1ss2TG	TGGAGCCGCGTCAATATCTCC	up	1.47432	0.560045	0.804905	1.27628	1.88163	3.82883	0	0	0	5.6449	0	7	0	0	0	8	0	middle
608	PC-5p-114270_18	TTGATCTTCATCTCCCTCAAA	up	1.47145	0.557243	0.805781	0.799223	1.17602	0	2.39767	0	0	3.52806	0	0	7	0	0	5	0	low
609	aof-miR160b_L-2R+2	CCTGGTTCCCTGTATGCCACA	up	1.20842	0.273117	0.812718	2.54415	3.07439	3.00836	4.62408	0	0	3.88087	5.3423	5.5	13.5	0	0	5.5	4	low
610	gma-miR6300_1ss17GT	GTCGTTGTAGTATAGTTG	up	1.31711	0.397373	0.82027	3.88017	5.1106	2.73488	8.90563	0	13.5678	1.76403	0	5	26	0	3	2.5	0	middle
611	vvi-miR3630-3p_L-3R-1	GGGAATCTCTCTGATGCA	down	0.755287	-0.404903	0.821234	28.3935	21.4452	3.55534	0	81.6251	33.9194	13.0538	17.3625	6.5	0	71.5	7.5	18.5	13	middle
612	PC-3p-128518_15	TCTTGGATCCGTCATCATCTC	up	1.37336	0.457707	0.837769	1.02757	1.41122	0	3.08272	0	0	4.23367	0	0	9	0	0	6	0	low
613	PC-5p-110770_19	TCGCTGTTAGGAATAGTGACC	down	0.73119	-0.451682	0.839757	1.52215	1.11298	0	0	4.56644	0	0	3.33893	0	0	4	0	0	2.5	low
614	gma-MIR6300-p5_1ss8AG_2	TAGTGGTGAGTATTCCCGCC	up	1.25543	0.328179	0.84194	12.2677	15.4012	1.64093	5.48039	29.6819	38.442	7.76173	0	3	16	26	8.5	11	0	middle
615	gma-MIR6300-p3_1ss8AG	TAGTGGTGAGTATTCCCGCC	up	1.25543	0.328179	0.84194	12.2677	15.4012	1.64093	5.48039	29.6819	38.442	7.76173	0	3	16	26	8.5	11	0	middle
616	gma-miR171n_R-1_1ss18CT	TTGAGCCGCGTCAATATTTT	up	1.35979	0.443381	0.842504	0.951342	1.29362	0	0	2.85402	0	3.88087	0	0	0	2.5	0	5.5	0	low
617	aof-miR166a_L-2R+2_2	TCGGACCAGGCTTCATTCCTC	up	1.02131	0.0304242	0.847459	2368.56	2419.03	2687.29	1937.66	2480.72	2528.13	2461.17	2267.8	4913	5657	2173	559	3488	1698	high
618	aof-miR166a_L-2R+2_1	TCGGACCAGGCTTCATTCCCC	up	1.02131	0.0304242	0.847459	2368.56	2419.03	2687.29	1937.66	2480.72	2528.13	2461.17	2267.8	4913	5657	2173	559	3488	1698	high
619	ptc-miR160h	TGCCTGGCTCCCTGCATGCCA	up	1.31093	0.390593	0.86021	1.25592	1.64643	0	3.76777	0	0	4.93928	0	0	11	0	0	7	0	low
620	PC-5p-25927_111	TTGTCAATAGCGGTCTTGTCT	down	0.873263	-0.195512	0.860685	3.68412	3.21721	5.74324	5.30912	0	0	5.6449	4.00672	10.5	15.5	0	0	8	3	low
621	aof-miR171c_2ss10GA21CA	TTGAGCCGCATCAATATCTCA	up	1.12223	0.166369	0.866131	9.54353	10.71	13.6744	9.24815	5.70805	0	20.1099	12.0202	25	27	5	0	28.5	9	middle
622	aof-miR166c_3ss17CT20CT21CT	TCGGACCAGGCTTCATTCCTT	up	1.0743	0.103403	0.877871	174.228	187.174	173.118	56.174	293.394	117.587	240.261	203.675	316.5	164	257	26	340.5	152.5	high
623	gma-MIR6300-p5_1ss8AG_1	TAGTGGTGAGTATTCCCG	up	1.22054	0.287521	0.881242	8.18161	9.98599	0	1.71262	22.8322	27.1355	2.82245	0	0	5	20	6	4	0	middle
624	aof-miR167a	TGAAGCTGCCAGCATGATCTA	up	1.15016	0.201841	0.882349	4.29925	4.94484	7.93114	4.9666	0	11.3065	3.52806	0	14.5	14.5	0	2.5	5	0	middle
625	aof-miR396b_1ss2TN	TNCCACAGCTTTCTTGAACTG	up	1.21076	0.275915	0.88395	3.39957	4.11607	4.3758	5.82291	0	0	12.3482	0	8	17	0	0	17.5	0	middle
626	aof-miR171b_L-1R+2_1ss9CT	TGAGCCGTGCCAATATCACTCC	up	1.08989	0.124176	0.887854	15.7989	17.219	27.0753	7.19301	13.1285	13.5678	6.70331	31.386	49.5	21	11.5	3	9.5	23.5	middle
627	osa-MIR159e-p5_2ss18AC21AC	TTTGCATGACTCGGGAGCTGC	down	0.934373	-0.0979297	0.893116	370.767	346.434	369.208	148.313	594.779	158.291	340.105	540.907	675	433	521	35	482	405	high
628	gma-MIR397a-p3_2ss2CT21CA	TTATCGACACTGCACTCAATA	down	0.824113	-0.279085	0.898816	1.14161	0.940816	0	0	3.42483	0	2.82245	0	0	0	3	0	4	0	middle
629	aof-miR396b_R-2_1ss19CT	TTCCACAGCTTTCTTGAAT	down	0.824113	-0.279085	0.898816	1.14161	0.940816	0	0	3.42483	0	2.82245	0	0	0	3	0	4	0	low
630	lus-MIR172d-p5_2ss9CA17AT	TCAAGATTAACATGTATAGCT	up	1.08698	0.120319	0.904801	12.3167	13.388	8.7516	6.50796	21.6906	27.1355	6.35051	6.67787	16	19	19	6	9	5	middle
631	nta-MIR172f-p3_2ss14CG18TA	TTGGAACGATACAGAGAA	down	0.889037	-0.169685	0.908628	19.8045	17.607	4.10231	2.22641	53.0849	24.8742	10.5842	17.3625	7.5	6.5	46.5	5.5	15	13	middle
632	gma-miR6300_L-1R+1	TCGTTGTAGTATAGTGGT	up	1.08379	0.11609	0.910352	86.7863	94.0585	45.6724	56.0027	158.684	187.687	68.4444	26.0437	83.5	163.5	139	41.5	97	19.5	middle
633	bol-MIR9410-p3_2ss4TG17TA	TTTGCAGACGACTTAAAT	up	1.07954	0.110415	0.91084	12.186	13.1552	4.64929	5.65165	26.257	20.3516	7.76173	11.3524	8.5	16.5	23	4.5	11	8.5	middle
634	bol-MIR9410-p5_2ss4TG17TA_1	TTTGCAGACGACTTAAAT	up	1.07954	0.110415	0.91084	12.186	13.1552	4.64929	5.65165	26.257	20.3516	7.76173	11.3524	8.5	16.5	23	4.5	11	8.5	middle
635	bol-MIR9410-p5_2ss4TG17TA_2	TTTGCAGACGACTTAAATA	up	1.07954	0.110415	0.91084	12.186	13.1552	4.64929	5.65165	26.257	20.3516	7.76173	11.3524	8.5	16.5	23	4.5	11	8.5	middle
636	ath-miR159c_R-1_1ss12GT	TTTGGATTGAATGGAGCTCC	down	0.918637	-0.122433	0.910881	2.2357	2.05379	3.28185	3.42524	0	0	2.82245	3.33893	6	10	0	0	4	2.5	low
637	ptc-MIR6438b-p3_2ss1CA17TA	ATATTTCACTATTCTGAGCA	up	1.1699	0.22639	0.917536	1.33188	1.55817	0	0	3.99563	0	0	4.67451	0	0	3.5	0	0	3.5	low
638	mtr-miR156b-3p_L-1_1ss15CT	GCTCACTCTCTATTTGTCACC	down	0.923729	-0.114458	0.928358	23.825	22.0079	7.65765	11.3033	52.5141	0	23.2852	42.7384	14	33	46	0	33	32	middle
639	gma-MIR6300-p5_1ss13AG	TAGTATAGTGGTGAGTATTCCCG	down	0.902455	-0.148073	0.930928	12.6291	11.3972	1.64093	2.56893	33.6775	27.1355	7.05612	0	3	7.5	29.5	6	10	0	middle
640	gra-MIR8665-p5_2ss12TC17GC	TTTGGTAATCTCTATTCTT	down	0.899901	-0.152162	0.93397	1.23678	1.11298	0	0.85631	2.85402	0	0	3.33893	0	2.5	2.5	0	0	2.5	low
641	aof-miR393a	TCCAAAGGGATCGCATTGATTC	up	1.10147	0.139426	0.940397	11.6378	12.8186	10.9395	0	23.9738	0	38.4559	0	20	0	21	0	54.5	0	middle
642	PC-5p-19884_147	CGATTGTGGAGGGGCAGATGT	up	1.10925	0.149585	0.945232	0.742136	0.823214	0	2.22641	0	0	2.46964	0	0	6.5	0	0	3.5	0	middle
643	aof-miR164_2ss20CT21AT	TGGAGAAGCAGGGCACGTGTT	up	1.03361	0.047692	0.954263	141.796	146.562	276.222	123.48	25.6862	153.768	120.307	165.611	505	360.5	22.5	34	170.5	124	high
644	aof-miR396b_R-1	TTCCACAGCTTTCTTGAACT	up	1.04474	0.0631432	0.962222	807.343	843.463	152.606	126.049	2143.37	1049.24	591.656	889.492	279	368	1877.5	232	838.5	666	high
645	PC-3p-71676_34	CTTTGAAAGACCGCGCAACTT	down	0.93638	-0.0948338	0.965195	1.25592	1.17602	0	3.76777	0	0	3.52806	0	0	11	0	0	5	0	middle
646	csi-miR159b-5p_1ss1AT	TGCTGCCGACTCATTCATTCA	down	0.972306	-0.0405171	0.971963	77.5573	75.4095	112.677	98.3044	21.6906	40.7033	172.169	13.3557	206	287	19	9	244	10	middle
647	ptc-MIR6438b-p3_2ss16TA20CT	TATTTCACTATTCTGAGCAT	down	0.973436	-0.0388414	0.981706	3.80544	3.70435	0	1.71262	9.70368	0	1.76403	9.34902	0	5	8.5	0	2.5	7	low
648	mtr-MIR2592bi-p3_2ss8TC19AT_1	ATTCCCACTGTCCCTGTCT	down	0.984821	-0.0220668	0.98341	23.0468	22.697	24.6139	30.8272	13.6993	0	49.3928	18.698	45	90	12	0	70	14	middle
649	mtr-MIR2592bi-p3_2ss8TC19AT_2	ATTCCCACTGTCCCTGTCTA	down	0.984821	-0.0220668	0.98341	23.0468	22.697	24.6139	30.8272	13.6993	0	49.3928	18.698	45	90	12	0	70	14	middle
650	sbi-MIR398-p5_2ss5GA18AG	GGGGACGGACTGGGAACG	up	1.01443	0.0206655	0.987906	4.64266	4.70964	6.5637	7.36427	0	11.3065	2.82245	0	12	21.5	0	2.5	4	0	middle
651	sbi-MIR398-p3_2ss5GA18AG	GGGGACGGACTGGGAACG	up	1.01443	0.0206655	0.987906	4.64266	4.70964	6.5637	7.36427	0	11.3065	2.82245	0	12	21.5	0	2.5	4	0	middle
652	PC-3p-206768_7	TGTATGTTTGGGGTAAGAAACAAT	down	0.98097	-0.0277196	0.989812	1.19883	1.17602	0	3.5965	0	0	3.52806	0	0	10.5	0	0	5	0	low
653	bdi-miR5059_L-2_1ss3GT	TCCTGGGCAGCACCACCA	up	1.00434	0.0062521	0.9972	3.04443	3.05765	0	3.42524	5.70805	0	9.17296	0	0	10	5	0	13	0	middle
