# Supplementary material for: Integration of mRNA and miRNA Analysis Reveals the Post-Transcriptional Regulation of Salt Stress Response in Hemerocallis fulva
Source: Int J Mol Sci. 2023 Apr 14;24(8):7290. doi: 10.3390/ijms24087290 (PMC10139057; doi:10.3390/ijms24087290)
Supplement: Supplementary file 1 [file ijms-24-07290-s001.zip › Table S8.xlsx]

## Sheet: Sheet1
Table S8 The quality analysis of transcriptome data and genome mapping
Sample	Raw Data		Valid Data				Valid Ratio(reads)	Q20%	Q30%	GC content%
	Read	Base	Read	Base	Mapped reads	Unique Mapped reads
NaCl_leaf_1	40314952	6.05G	37725040	5.66G	30237704(80.15%)	16014075(42.45%)	93.58	99.92	98.09	46.5
NaCl_leaf_2	47311806	7.10G	42225000	6.33G	32128714(76.09%)	16487122(39.05%)	89.25	99.95	98.13	45.5
NaCl_leaf_3	36904372	5.54G	34570088	5.19G	27415360(79.30%)	14741703(42.64%)	93.67	99.91	98.44	45.5
NT_leaf_3	47555766	7.13G	42675628	6.40G	31020255(72.69%)	15979106(37.44%)	89.74	99.93	98.47	44.5
NaCl_root_1	37109954	5.57G	33588660	5.04G	25534354(76.02%)	13443172(40.02%)	90.51	99.91	97.79	46.5
NaCl_root_2	47153392	7.07G	43068414	6.46G	34464442(80.02%)	18825255(43.71%)	91.34	99.9	97.75	48
NaCl_root_3	40765232	6.11G	35980856	5.40G	27526056(76.50%)	15058676(41.85%)	88.26	99.91	98.46	46
NT_leaf_1	52313546	7.85G	47045186	7.06G	34226624(72.75%)	18150297(38.58%)	89.93	99.93	97.97	43.5
NT_leaf_2	53328750	8.00G	47930886	7.19G	34622043(72.23%)	18307376(38.20%)	89.88	99.94	97.98	43.5
NT_root_1	54924464	8.24G	52311624	7.85G	43738133(83.61%)	23622711(45.16%)	95.24	99.91	97.94	46.5
NT_root_2	43696180	6.55G	41813180	6.27G	34954025(83.60%)	18849385(45.08%)	95.69	99.92	97.85	46.5
NT_root_3	54532236	8.18G	51661232	7.75G	43191969(83.61%)	23631840(45.74%)	94.74	99.91	97.54	46.5
