# Supplementary material for: Integration of mRNA and miRNA Analysis Reveals the Post-Transcriptional Regulation of Salt Stress Response in Hemerocallis fulva
Source: Int J Mol Sci. 2023 Apr 14;24(8):7290. doi: 10.3390/ijms24087290 (PMC10139057; doi:10.3390/ijms24087290)
Supplement: Supplementary file 1 [file ijms-24-07290-s001.zip › Table S9.xlsx]

## Sheet: DEGs in leaves
Table S9 The DEGs identified in leaves of H. fulva under NaCl treatment
gene_id	gene_name	transcript_id	GO	KEGG	KO_ENTRY	EC	Description	trans_type	FPKM.NaCl_leaf_1	FPKM.NaCl_leaf_2	FPKM.NaCl_leaf_3	FPKM.NT_leaf_3	FPKM.NT_leaf_1	FPKM.NT_leaf_2	fc	log2(fc)	pval	qval	regulation	significant
MSTRG.6216	HHC043548	rna-HHC043548.1;rna-HHC043548.2	GO:0003677(DNA binding);GO:0003700(DNA binding transcription factor activity);GO:0005634(nucleus);GO:0006355(regulation of transcription, DNA-templated);GO:0007623(circadian rhythm);GO:0009734(auxin-activated signaling pathway);GO:0009851(auxin biosynthetic process);GO:0010600(regulation of auxin biosynthetic process);GO:0010600(regulation of auxin biosynthetic process)	04712(Circadian rhythm - plant);04712(Circadian rhythm - plant)	K12133	NA	protein REVEILLE 2-like [Asparagus officinalis]	NA	52.6116	37.2966	40.8482	26.8303	1.39595	0.593502	39.6055	5.30763	1.0378e-14	3.29532e-10	up	yes
MSTRG.10425	HHC009109	MSTRG.10425.1	NA	NA	NA	NA		NA	0.0001	0.0001	0.0001	0.0001	7.60084	4.33788	1.67522e-05	-15.8653	3.05035e-13	4.84289e-09	down	yes
MSTRG.17009		MSTRG.17009.1	NA	NA	NA	NA		NA	0.0001	0.0001	0.0001	0.0001	4.29752	1.22406	3.62215e-05	-14.7528	7.98619e-13	8.45285e-09	down	yes
MSTRG.26109		MSTRG.26109.1	NA	NA	NA	NA		NA	0.0001	0.0001	0.0001	0.0001	2.87993	0.63768	5.68567e-05	-14.1023	1.52227e-12	1.20841e-08	down	yes
MSTRG.18079		MSTRG.18079.1	NA	NA	NA	NA		NA	0.0001	0.0001	0.0001	0.0001	0.894406	1.06131	0.000102265	-13.2554	1.36202e-11	8.64962e-08	down	yes
MSTRG.10583	HHC009369	rna-HHC009369.1;rna-HHC009369.2	GO:0003674(molecular_function);GO:0009507(chloroplast);GO:0009658(chloroplast organization);GO:0009793(embryo development ending in seed dormancy);GO:0010027(thylakoid membrane organization);GO:0016021(integral component of membrane);GO:0090056(regulation of chlorophyll metabolic process);GO:0090056(regulation of chlorophyll metabolic process)	NA	NA	NA	uncharacterized protein LOC109836090 [Asparagus officinalis]	NA	1.47434	0.681648	2.24559	0.235164	0.00118824	0.000127528	1761.99	10.783	2.85624e-11	1.51157e-07	up	yes
MSTRG.24471	HHC029530	rna-HHC029530.1;MSTRG.24471.2	GO:0005737(cytoplasm);GO:0010345(suberin biosynthetic process);GO:0016740(transferase activity);GO:0016747(transferase activity, transferring acyl groups other than amino-acyl groups);GO:0050734(hydroxycinnamoyltransferase activity);GO:0052325(cell wall pectin biosynthetic process);GO:0102406(omega-hydroxypalmitate O-sinapoyl transferase activity)	00073(Cutin, suberine and wax biosynthesis)	K15400	EC:2.3.1.188	LOW QUALITY PROTEIN: omega-hydroxypalmitate O-feruloyl transferase-like [Asparagus officinalis]	NA	33.2298	46.499	50.7952	93.2889	3.99398	2.95185	16.1113	4.01	4.70877e-11	2.13596e-07	up	yes
MSTRG.25873		MSTRG.25873.1	NA	NA	NA	NA		NA	0.0001	0.0001	0.0001	0.0001	5.71713	6.4957	1.63762e-05	-15.898	7.01691e-11	2.7851e-07	down	yes
MSTRG.963	HHC001182	rna-HHC001182.1	GO:0003735(structural constituent of ribosome);GO:0005763(mitochondrial small ribosomal subunit);GO:0006412(translation)	03010(Ribosome)	K02967	NA	ribosomal protein S2 (chloroplast) [Phormium tenax]	NA	32.7459	8.68311	4.94487	30.1427	0.0001	0.0001	191292	17.5454	9.2149e-11	3.25112e-07	up	yes
MSTRG.17857		MSTRG.17857.1	NA	NA	NA	NA		NA	0.0001	0.0001	0.0001	0.0001	4.10705	5.03981	2.18654e-05	-15.481	4.16438e-10	1.32232e-06	down	yes
MSTRG.10105	HHC008604	rna-HHC008604.2;rna-HHC008604.1	GO:0005783(endoplasmic reticulum);GO:0006888(ER to Golgi vesicle-mediated transport);GO:0006890(retrograde vesicle-mediated transport, Golgi to ER);GO:0031201(SNARE complex);GO:0031201(SNARE complex)	04130(SNARE interactions in vesicular transport);04145(Phagosome);04145(Phagosome)	K08492	NA	PREDICTED: syntaxin-81 [Elaeis guineensis]	NA	0.83729	0.859222	0.60395	0.750176	0.0001	0.0001	7626.59	12.8968	9.99254e-10	2.88448e-06	up	yes
MSTRG.12688		MSTRG.12688.1	NA	NA	NA	NA		NA	0.0001	0.0001	0.0001	0.0001	0.309738	0.412108	0.000277067	-11.8175	1.30964e-09	3.46542e-06	down	yes
MSTRG.16957	HHC018289	rna-HHC018289.1	NA	NA	NA	NA	PREDICTED: kinesin-like protein KIN-13B isoform X1 [Musa acuminata subsp. malaccensis]	NA	0.0001	0.0001	0.0001	0.0001	1.94493	1.73423	5.43603e-05	-14.1671	2.52352e-09	6.16381e-06	down	yes
MSTRG.14817	HHC015515	rna-HHC015515.1;rna-HHC015515.3;rna-HHC015515.2	GO:0003677(DNA binding);GO:0003700(DNA binding transcription factor activity);GO:0005634(nucleus);GO:0005789(endoplasmic reticulum membrane);GO:0006351(transcription, DNA-templated);GO:0006355(regulation of transcription, DNA-templated);GO:0007275(multicellular organism development);GO:0016021(integral component of membrane);GO:0070301(cellular response to hydrogen peroxide);GO:0070301(cellular r…	03013(RNA transport);03015(mRNA surveillance pathway);03018(RNA degradation);03018(RNA degradation)	K13126	NA	NAC domain-containing protein 17-like [Asparagus officinalis]	NA	128.742	78.7751	80.9433	64.2856	8.17233	10.921	9.2374	3.20749	1.16879e-08	2.6509e-05	up	yes
MSTRG.35439		MSTRG.35439.1	NA	NA	NA	NA		NA	0.0001	0.0001	0.142309	0.0001	5.70677	4.66937	0.00687195	-7.18506	3.82206e-08	8.09079e-05	down	yes
MSTRG.33879	HHC051197	MSTRG.33879.1	NA	NA	NA	NA		NA	11.7391	17.4566	6.74914	1.73665	0.0001	0.0001	94203.6	16.5235	6.58492e-08	0.000130682	up	yes
MSTRG.16558	HHC017748	rna-HHC017748.1;rna-HHC017748.4;rna-HHC017748.2;rna-HHC017748.3	GO:0003942(N-acetyl-gamma-glutamyl-phosphate reductase activity);GO:0005507(copper ion binding);GO:0005730(nucleolus);GO:0005737(cytoplasm);GO:0006520(cellular amino acid metabolic process);GO:0006526(arginine biosynthetic process);GO:0009507(chloroplast);GO:0009570(chloroplast stroma);GO:0016020(membrane);GO:0016620(oxidoreductase activity, acting on the aldehyde or oxo group of donors, NAD or N…	00220(Arginine biosynthesis);00220(Arginine biosynthesis)	K00145	EC:1.2.1.38	probable N-acetyl-gamma-glutamyl-phosphate reductase, chloroplastic isoform X1 [Asparagus officinalis]	NA	9.39492	9.23271	14.676	16.4948	1.3802	1.86288	7.67763	2.94066	7.33403e-08	0.000136987	up	yes
MSTRG.3955	HHC005845	rna-HHC005845.1;MSTRG.3955.3;MSTRG.3955.2	GO:0003924(GTPase activity);GO:0005622(intracellular);GO:0006412(translation)	NA	NA	NA	uncharacterized protein A4U43_C06F80 [Asparagus officinalis]	NA	24.8436	13.5754	14.0618	23.7773	1.14849	2.13093	11.6268	3.53938	1.27751e-07	0.000225361	up	yes
MSTRG.24884	HHC030104	MSTRG.24884.1	NA	NA	NA	NA		NA	2.41278	2.40262	0.388047	4.3066	25.8388	27.501	0.0891457	-3.48769	1.38739e-07	0.000231862	down	yes
MSTRG.35901	HHC049979	rna-HHC049979.1	GO:0000776(kinetochore);GO:0007094(mitotic spindle assembly checkpoint);GO:0009524(phragmoplast);GO:0033597(mitotic checkpoint complex);GO:0043130(ubiquitin binding);GO:1990298(bub1-bub3 complex)	NA	NA	NA	mitotic checkpoint protein BUB3.1-like [Asparagus officinalis]	NA	21.5464	1.22669	21.1751	10.9742	0.0001	0.0001	137306	17.067	3.09874e-07	0.000491971	up	yes
MSTRG.5136	HHC042051	rna-HHC042051.2;rna-HHC042051.1	GO:0000398(mRNA splicing, via spliceosome);GO:0004004(ATP-dependent RNA helicase activity);GO:0005681(spliceosomal complex);GO:0005737(cytoplasm);GO:0005737(cytoplasm)	03040(Spliceosome);03040(Spliceosome)	K12815	EC:3.6.4.13	LOW QUALITY PROTEIN: pre-mRNA-splicing factor ATP-dependent RNA helicase DEAH7 [Asparagus officinalis]	NA	131.967	127.344	95.5132	128.637	21.9918	21.4001	5.57088	2.47791	4.81227e-07	0.000727638	up	yes
MSTRG.1962	HHC002562	MSTRG.1962.1;MSTRG.1962.2	NA	NA	NA	NA		NA	0.0001	0.0001	0.0218866	0.0001	0.489339	1.05538	0.00718143	-7.12151	6.47367e-07	0.000934357	down	yes
MSTRG.14932	HHC015661	rna-HHC015661.1;MSTRG.14932.2	GO:0003735(structural constituent of ribosome);GO:0006412(translation);GO:0009507(chloroplast);GO:0015935(small ribosomal subunit)	03010(Ribosome)	K02956	NA	uncharacterized protein LOC109819493 [Asparagus officinalis]	NA	13.0445	13.7472	14.634	18.6569	1.52762	1.80894	9.00368	3.17051	1.43806e-06	0.00198533	up	yes
MSTRG.18589	HHC020811	MSTRG.18589.2;rna-HHC020811.1	GO:0003735(structural constituent of ribosome);GO:0006412(translation)	NA	NA	NA	PREDICTED: mitochondrial carnitine/acylcarnitine carrier-like protein [Elaeis guineensis]	NA	18.1409	26.0842	24.9054	17.8646	4.63834	4.26509	4.88548	2.2885	3.59811e-06	0.00472534	up	yes
MSTRG.7784	HHC045786	MSTRG.7784.2;MSTRG.7784.1	NA	NA	NA	NA		NA	13.2607	18.9545	0.0001	4.79609	0.0001	0.0001	92528.5	16.4976	3.72039e-06	0.00472534	up	yes
MSTRG.33144	HHC052171	MSTRG.33144.1;rna-HHC052171.1	GO:0005622(intracellular);GO:0005634(nucleus);GO:0005795(Golgi stack);GO:0005829(cytosol);GO:0005886(plasma membrane);GO:0006886(intracellular protein transport);GO:0006891(intra-Golgi vesicle-mediated transport)	NA	NA	NA	TOM1-like protein 2 [Asparagus officinalis]	NA	2.34327	0.854204	0.171558	0.377346	0.0001	0.0001	9365.94	13.1932	7.6804e-06	0.00937984	up	yes
MSTRG.8753	HHC006307	rna-HHC006307.1	NA	NA	NA	NA	metallothionein type 2, partial [Typha angustifolia]	NA	4.36763	10.7195	1.52664	1.6593	0.365088	0.184047	16.6381	4.05642	8.88342e-06	0.0104472	up	yes
MSTRG.28534	HHC035961	MSTRG.28534.2;rna-HHC035961.1	GO:0005737(cytoplasm);GO:0009636(response to toxic substance);GO:0016740(transferase activity);GO:0050736(O-malonyltransferase activity)	00944(Flavone and flavonol biosynthesis);00943(Isoflavonoid biosynthesis)	K13264	EC:2.3.1.115	PREDICTED: malonyl-coenzyme A:anthocyanin 3-O-glucoside-6''-O-malonyltransferase-like [Elaeis guineensis]	NA	50.4243	26.5006	26.6444	26.7977	6.52784	5.62096	5.36543	2.42369	9.73836e-06	0.0110437	up	yes
MSTRG.9936	HHC008303	rna-HHC008303.1;rna-HHC008303.3;rna-HHC008303.2	GO:0004066(asparagine synthase (glutamine-hydrolyzing) activity);GO:0005829(cytosol);GO:0006529(asparagine biosynthetic process);GO:0006541(glutamine metabolic process);GO:0009646(response to absence of light);GO:0042803(protein homodimerization activity);GO:0042803(protein homodimerization activity)	00250(Alanine, aspartate and glutamate metabolism);00250(Alanine, aspartate and glutamate metabolism)	K01953	EC:6.3.5.4	LOC109848100 gene product [Asparagus officinalis]	NA	3.85297	23.1341	7.4405	0.58006	0.0001	0.0001	87519	16.4173	1.76105e-05	0.0190621	up	yes
gene-HHC036194	HHC036194	rna-HHC036194.1	GO:0005737(cytoplasm);GO:0051015(actin filament binding);GO:0051017(actin filament bundle assembly)	NA	NA	NA	LIM domain-containing protein WLIM2b-like [Phoenix dactylifera]	NA	6.727	2.09485	0.20137	0.0924315	0.0001	0.0001	22789.1	14.4761	1.80097e-05	0.0190621	up	yes
MSTRG.659	HHC000769	rna-HHC000769.1	NA	NA	NA	NA		NA	5.93185	10.6378	3.94719	0.0001	0.0001	0.0001	51292.3	15.6465	2.06812e-05	0.0211835	up	yes
MSTRG.10196	HHC008742	rna-HHC008742.2;rna-HHC008742.1;rna-HHC008742.6;rna-HHC008742.3;rna-HHC008742.5;rna-HHC008742.4;MSTRG.10196.1	GO:0002020(protease binding);GO:0005515(protein binding);GO:0005524(ATP binding);GO:0005618(cell wall);GO:0005634(nucleus);GO:0005730(nucleolus);GO:0005737(cytoplasm);GO:0005774(vacuolar membrane);GO:0005794(Golgi apparatus);GO:0005829(cytosol);GO:0005886(plasma membrane);GO:0006351(transcription, DNA-templated);GO:0006355(regulation of transcription, DNA-templated);GO:0006457(protein folding);GO…	03040(Spliceosome);04141(Protein processing in endoplasmic reticulum);04144(Endocytosis);04144(Endocytosis)	K03283	NA	heat shock cognate 70 kDa protein 2-like [Asparagus officinalis];heat shock protein 70 [Chimonanthus praecox];heat shock cognate 70 kDa protein 2 [Asparagus officinalis];PREDICTED: heat shock cognate 70 kDa protein 2 [Oryza brachyantha]	NA	11.2944	8.69681	8.42632	7.70646	28.7036	50.0233	0.229426	-2.1239	2.19617e-05	0.0217922	down	yes
MSTRG.23691		MSTRG.23691.1	NA	NA	NA	NA		NA	14.0523	7.64582	11.4469	0.0001	0.0001	0.0001	82862.7	16.3384	2.26703e-05	0.0218136	up	yes
MSTRG.23333	HHC028017	MSTRG.23333.1	NA	NA	NA	NA		NA	1.27284	56.8436	112.159	0.0001	0.0001	0.0001	425688	18.6994	2.62597e-05	0.0245243	up	yes
MSTRG.2504		MSTRG.2504.1	NA	NA	NA	NA		NA	1.25177	2.66961	3.79889	5.16384	18.8967	25.4482	0.145272	-2.78318	3.28704e-05	0.029821	down	yes
MSTRG.31188	HHC039832	rna-HHC039832.1	GO:0005634(nucleus);GO:0005737(cytoplasm);GO:0009611(response to wounding);GO:0009694(jasmonic acid metabolic process);GO:0009695(jasmonic acid biosynthetic process);GO:0009867(jasmonic acid mediated signaling pathway);GO:0030795(jasmonate O-methyltransferase activity);GO:0031408(oxylipin biosynthetic process);GO:0032259(methylation);GO:0102078(methyl jasmonate methylesterase activity)	NA	NA	NA	benzoate carboxyl methyltransferase [Populus trichocarpa]	NA	107.399	9.60935	0.263017	1.15746	0.0001	0.0001	296071	18.1756	3.61709e-05	0.0319038	up	yes
MSTRG.9284		MSTRG.9284.1;MSTRG.9284.3;MSTRG.9284.4;MSTRG.9284.2	NA	NA	NA	NA		NA	10.0746	6.95294	13.6754	0.0001	0.0001	0.0001	76757.6	16.228	4.90427e-05	0.0416256	up	yes
MSTRG.25407	HHC030921	rna-HHC030921.1	GO:0005730(nucleolus);GO:0043565(sequence-specific DNA binding);GO:2000014(regulation of endosperm development)	NA	NA	NA	high mobility group I/Y-2, partial [Hyacinthus orientalis]	NA	172.294	75.6824	145.661	15.3832	7.15352	12.065	10.6413	3.4116	4.98149e-05	0.0416256	up	yes
MSTRG.19993	HHC022738	rna-HHC022738.1;MSTRG.19993.2;MSTRG.19993.1	GO:0006511(ubiquitin-dependent protein catabolic process);GO:0008541(proteasome regulatory particle, lid subcomplex)	03050(Proteasome)	K03033	NA	26S proteasome non-ATPase regulatory subunit 3 like [Actinidia chinensis var. chinensis]	NA	39.0339	29.6809	23.0054	19.1482	7.70089	2.47189	5.44927	2.44606	5.19518e-05	0.0422981	up	yes
MSTRG.14560	HHC015131	rna-HHC015131.3;rna-HHC015131.1;rna-HHC015131.2	GO:0000166(nucleotide binding);GO:0005080(protein kinase C binding);GO:0005777(peroxisome);GO:0005829(cytosol);GO:0005886(plasma membrane);GO:0006790(sulfur compound metabolic process);GO:0008270(zinc ion binding);GO:0009150(purine ribonucleotide metabolic process);GO:0009507(chloroplast);GO:0047627(adenylylsulfatase activity);GO:0047627(adenylylsulfatase activity)	NA	NA	NA	14 kDa zinc-binding protein-like [Asparagus officinalis]	NA	20.4579	14.8948	9.37339	7.23492	3.02651	2.27395	4.90156	2.29324	5.59914e-05	0.0444474	up	yes
MSTRG.36138	HHC047581	rna-HHC047581.1	GO:0003674(molecular_function);GO:0008150(biological_process);GO:0009507(chloroplast);GO:0009535(chloroplast thylakoid membrane)	NA	NA	NA	uncharacterized protein LOC109823770 [Asparagus officinalis]	NA	36.6887	20.7842	2.9776	0.0001	0.0001	0.0001	151126	17.2054	6.71915e-05	0.0520374	up	yes
MSTRG.18274	HHC020411	rna-HHC020411.2;rna-HHC020411.1	GO:0000103(sulfate assimilation);GO:0005737(cytoplasm);GO:0005829(cytosol);GO:0006535(cysteine biosynthetic process from serine);GO:0009001(serine O-acetyltransferase activity);GO:0016407(acetyltransferase activity);GO:0019344(cysteine biosynthetic process);GO:0019344(cysteine biosynthetic process)	00920(Sulfur metabolism);00270(Cysteine and methionine metabolism);00270(Cysteine and methionine metabolism)	K00640	EC:2.3.1.30	PREDICTED: probable serine acetyltransferase 2 [Elaeis guineensis];probable serine acetyltransferase 2 isoform X1 [Asparagus officinalis]	NA	2.00713	2.14468	2.61632	0.640896	0.0676856	0.1682	15.7047	3.97313	7.49571e-05	0.0554515	up	yes
gene-HHC030409	HHC030409	rna-HHC030409.1	GO:0003723(RNA binding);GO:0004519(endonuclease activity);GO:0005739(mitochondrion);GO:0009451(RNA modification);GO:0009793(embryo development ending in seed dormancy);GO:0032543(mitochondrial translation)	NA	NA	NA	uncharacterized protein A4U43_C06F1710 [Asparagus officinalis]	NA	0.781391	0.363203	0.185963	0.0786743	0.0001	0.0001	3523.08	11.7826	7.50925e-05	0.0554515	up	yes
MSTRG.21920	HHC025647	MSTRG.21920.4;MSTRG.21920.5;rna-HHC025647.1;MSTRG.21920.2;MSTRG.21920.3	GO:0004252(serine-type endopeptidase activity);GO:0006508(proteolysis);GO:0009507(chloroplast);GO:0009534(chloroplast thylakoid);GO:0009570(chloroplast stroma);GO:0009658(chloroplast organization);GO:0009840(chloroplastic endopeptidase Clp complex);GO:0009941(chloroplast envelope);GO:0010287(plastoglobule)	NA	NA	NA	ATP-dependent Clp protease proteolytic subunit-related protein 2, chloroplastic [Asparagus officinalis]	NA	33.8122	40.6313	30.9738	28.7016	9.21367	9.53816	3.57616	1.83841	7.76287e-05	0.0560215	up	yes
MSTRG.20232	HHC023060	rna-HHC023060.1	GO:0003674(molecular_function);GO:0005634(nucleus)	NA	NA	NA	PREDICTED: uncharacterized protein LOC105039376 [Elaeis guineensis]	NA	1.21547	0.230629	0.714114	0.0401501	0.0001	0.0001	5500.9	12.4255	8.22991e-05	0.0580721	up	yes
MSTRG.25242	HHC030637	rna-HHC030637.1	GO:0005575(cellular_component);GO:0009056(catabolic process);GO:0016787(hydrolase activity);GO:0052689(carboxylic ester hydrolase activity)	04075(Plant hormone signal transduction)	K14493	EC:3.-.-.-	PREDICTED: probable carboxylesterase 17 [Elaeis guineensis]	NA	23.3385	38.185	3.2287	6.24078	0.946071	0.553916	23.6645	4.56465	8.78036e-05	0.0593815	up	yes
MSTRG.11823		MSTRG.11823.1;MSTRG.11823.2	NA	NA	NA	NA		NA	40.703	5.56136	1.56115	0.375018	0.175427	0.155282	72.8743	6.18734	9.08337e-05	0.0593815	up	yes
MSTRG.25760		MSTRG.25760.1	NA	NA	NA	NA		NA	5.87032	2.68393	2.67773	0.177875	0.0001	0.0001	28524.7	14.7999	9.09069e-05	0.0593815	up	yes
MSTRG.9579	HHC007524	rna-HHC007524.2;rna-HHC007524.3;rna-HHC007524.4;rna-HHC007524.1	GO:0003676(nucleic acid binding);GO:0003677(DNA binding);GO:0003700(DNA binding transcription factor activity);GO:0005634(nucleus);GO:0006351(transcription, DNA-templated);GO:0006355(regulation of transcription, DNA-templated);GO:0008270(zinc ion binding);GO:0009507(chloroplast);GO:0046872(metal ion binding);GO:0046872(metal ion binding)	00052(Galactose metabolism);00600(Sphingolipid metabolism);00531(Glycosaminoglycan degradation);00604(Glycosphingolipid biosynthesis - ganglio series);00511(Other glycan degradation);00511(Other glycan degradation)	K12309	EC:3.2.1.23	protein indeterminate-domain-containing protein [Cinnamomum micranthum f. kanehirae];protein indeterminate-domain 5, chloroplastic-like [Papaver somniferum]	NA	13.7067	4.12411	8.69732	15.0544	2.23838	1.99841	4.90732	2.29493	9.16352e-05	0.0593815	up	yes
MSTRG.13742	HHC014030;HHC014031	rna-HHC014030.1;MSTRG.13742.7;MSTRG.13742.1;MSTRG.13742.2;MSTRG.13742.5;MSTRG.13742.4;MSTRG.13742.6	GO:0005618(cell wall);GO:0033609(oxalate metabolic process);GO:0046564(oxalate decarboxylase activity)	00450(Selenocompound metabolism)	K00384	EC:1.8.1.9	putative germin-like protein 2-1 [Phoenix dactylifera]	NA	1.9924	1.72087	0.0512292	0.225708	0.0001	0.0001	9975.5	13.2842	9.68699e-05	0.0615182	up	yes
MSTRG.24644	HHC029749	MSTRG.24644.1;MSTRG.24644.4;rna-HHC029749.1;MSTRG.24644.3	GO:0003674(molecular_function);GO:0008150(biological_process);GO:0009507(chloroplast);GO:0009535(chloroplast thylakoid membrane);GO:0009579(thylakoid);GO:0016021(integral component of membrane)	00562(Inositol phosphate metabolism);04070(Phosphatidylinositol signaling system)	K01092	EC:3.1.3.25	protein CURVATURE THYLAKOID 1C, chloroplastic isoform X2 [Asparagus officinalis]	NA	14.7179	12.5221	11.9691	11.3177	44.8045	48.4683	0.270855	-1.88441	0.000108711	0.0676845	down	yes
MSTRG.34722	HHC050576	rna-HHC050576.1;MSTRG.34722.3;MSTRG.34722.2;MSTRG.34722.4	GO:0005634(nucleus);GO:0005737(cytoplasm);GO:0016567(protein ubiquitination);GO:0019941(modification-dependent protein catabolic process);GO:0031386(protein tag);GO:0031625(ubiquitin protein ligase binding);GO:0070628(proteasome binding)	NA	NA	NA	putative ubiquitin [Cinnamomum micranthum f. kanehirae]	NA	16.5389	83.6095	83.7016	60.2536	10.653	10.7138	5.71221	2.51405	0.000113736	0.0684665	up	yes
MSTRG.35070	HHC053568	MSTRG.35070.1;rna-HHC053568.1	NA	NA	NA	NA	uncharacterized protein LOC109826143 [Asparagus officinalis]	NA	10.4918	7.44261	15.521	8.21435	2.00292	1.79274	5.48912	2.45657	0.00011428	0.0684665	up	yes
MSTRG.3593		MSTRG.3593.1	NA	NA	NA	NA		NA	1.47514	85.4599	32.6295	0.0001	0.0001	0.0001	298911	18.1894	0.000118837	0.0698781	up	yes
MSTRG.15623	HHC016509	rna-HHC016509.1;MSTRG.15623.2;MSTRG.15623.4;MSTRG.15623.3	GO:0009809(lignin biosynthetic process);GO:0016020(membrane);GO:0016709(oxidoreductase activity, acting on paired donors, with incorporation or reduction of molecular oxygen, NAD(P)H as one donor, and incorporation of one atom of oxygen)	00940(Phenylpropanoid biosynthesis)	K09755	EC:1.14.-.-	cytochrome P450 84A1-like [Phoenix dactylifera]	NA	106.604	16.2498	7.78443	0.581226	0.509467	0.539872	62.5248	5.96636	0.00012277	0.0700615	up	yes
MSTRG.1690	HHC002176	MSTRG.1690.1;rna-HHC002176.1	GO:0005829(cytosol);GO:0008233(peptidase activity);GO:0019760(glucosinolate metabolic process)	NA	NA	NA	gamma-glutamyl peptidase 3-like protein [Cinnamomum micranthum f. kanehirae]	NA	43.4851	59.7679	1.81491	0.67279	0.519413	0.329855	62.2541	5.9601	0.000123561	0.0700615	up	yes
MSTRG.35525	HHC049680	rna-HHC049680.1;MSTRG.35525.2;MSTRG.35525.3;MSTRG.35525.4	GO:0005634(nucleus)	NA	NA	NA	uncharacterized protein LOC109850213 [Asparagus officinalis]	NA	34.1335	22.9217	57.0006	28.1107	146.038	155.005	0.236123	-2.08239	0.000127224	0.0708727	down	yes
MSTRG.464	HHC000528	MSTRG.464.1;rna-HHC000528.1	GO:0003993(acid phosphatase activity);GO:0009507(chloroplast)	04016(MAPK signaling pathway - plant)	K20728	NA	PREDICTED: acid phosphatase 1 [Vitis vinifera]	NA	8.80449	54.222	2.77111	0.0001	0.0001	0.0001	164494	17.3277	0.00013068	0.0715428	up	yes
MSTRG.10219	HHC008780	rna-HHC008780.1;rna-HHC008780.2	GO:0005215(transporter activity);GO:0005886(plasma membrane);GO:0006807(nitrogen compound metabolic process);GO:0006857(oligopeptide transport);GO:0009506(plasmodesma);GO:0015031(protein transport);GO:0016020(membrane);GO:0016021(integral component of membrane);GO:0022857(transmembrane transporter activity);GO:0042937(tripeptide transmembrane transporter activity);GO:0042938(dipeptide transport);…	NA	NA	NA	protein NRT1/ PTR FAMILY 8.1-like [Asparagus officinalis]	NA	23.4145	1.54314	18.3902	18.2684	1.98327	1.31889	9.32969	3.22183	0.000142678	0.0767874	up	yes
MSTRG.4841		MSTRG.4841.1	NA	NA	NA	NA		NA	2.74485	62.9207	52.5827	0.357214	0.0001	0.320452	185.002	7.5314	0.000150354	0.0795698	up	yes
MSTRG.22461	HHC026665	MSTRG.22461.2;MSTRG.22461.1	NA	NA	NA	NA		NA	1.0227	2.07878	5.68483	1.58251	17.7603	22.6579	0.128269	-2.96275	0.000154927	0.080646	down	yes
MSTRG.13441		MSTRG.13441.1	NA	NA	NA	NA		NA	405.565	113.706	56.1516	14.4699	10.1501	7.89189	16.3478	4.03102	0.000166686	0.0853674	up	yes
MSTRG.6055	HHC043336	MSTRG.6055.1;MSTRG.6055.3;rna-HHC043336.2;MSTRG.6055.6;rna-HHC043336.3;rna-HHC043336.1	GO:0005737(cytoplasm);GO:0008150(biological_process);GO:0016021(integral component of membrane);GO:0016740(transferase activity);GO:0016740(transferase activity)	NA	NA	NA	uncharacterized protein A4U43_C07F20750 [Asparagus officinalis]	NA	196.791	186.847	129.07	224.646	63.4288	45.6831	3.37888	1.75655	0.000170465	0.0859169	up	yes
MSTRG.16516		MSTRG.16516.1	NA	NA	NA	NA		NA	3.72098	4.08719	2.21011	0.0001	0.0001	0.0001	25045.9	14.6123	0.000179567	0.0887408	up	yes
MSTRG.4845		MSTRG.4845.1	NA	NA	NA	NA		NA	1.47008	24.1728	1.48043	0.0001	0.0001	0.0001	67808.5	16.0492	0.000183447	0.0887408	up	yes
MSTRG.4753		MSTRG.4753.1;MSTRG.4753.3;MSTRG.4753.2	NA	NA	NA	NA		NA	879.033	549.18	377.999	0.0001	0.54495	0.0001	1656.92	10.6943	0.000184452	0.0887408	up	yes
MSTRG.33103		MSTRG.33103.1	NA	NA	NA	NA		NA	36.4234	38.2442	4.8505	2.07383	1.41191	1.30318	15.0256	3.90935	0.000197632	0.0936627	up	yes
MSTRG.25988	HHC031971;HHC031972	MSTRG.25988.2;MSTRG.25988.1;MSTRG.25988.3;rna-HHC031971.1;rna-HHC031972.1	GO:0006813(potassium ion transport);GO:0015079(potassium ion transmembrane transporter activity);GO:0015299(solute:proton antiporter activity);GO:0015386(potassium:proton antiporter activity);GO:0016020(membrane);GO:0016021(integral component of membrane);GO:0022890(inorganic cation transmembrane transporter activity);GO:0071805(potassium ion transmembrane transport);GO:1902600(proton transmembra…	NA	NA	NA	PREDICTED: K(+) efflux antiporter 4-like isoform X1 [Nelumbo nucifera];uncharacterized protein A4U43_C04F25280 [Asparagus officinalis]	NA	40.3462	25.8096	30.7446	30.9594	106.114	121.695	0.280631	-1.83326	0.000211253	0.0985565	down	yes
MSTRG.33093	HHC049546;HHC049545	MSTRG.33093.3;MSTRG.33093.4;MSTRG.33093.7;MSTRG.33093.2;rna-HHC049546.1;rna-HHC049545.1;MSTRG.33093.6;MSTRG.33093.1	GO:0009809(lignin biosynthetic process);GO:0016020(membrane);GO:0016709(oxidoreductase activity, acting on paired donors, with incorporation or reduction of molecular oxygen, NAD(P)H as one donor, and incorporation of one atom of oxygen);GO:0016709(oxidoreductase activity, acting on paired donors, with incorporation or reduction of molecular oxygen, NAD(P)H as one donor, and incorporation of one …	00940(Phenylpropanoid biosynthesis);00940(Phenylpropanoid biosynthesis)	K09755	EC:1.14.-.-	cytochrome P450 84A1-like [Phoenix dactylifera]	NA	569.596	100.912	63.6311	18.9072	13.6517	4.06526	21.2521	4.40953	0.000214165	0.0985565	up	yes
MSTRG.18556	HHC020775	MSTRG.18556.1	NA	NA	NA	NA		NA	3.96038	5.57921	0.338634	0.296626	0.0001	0.0001	25437.1	14.6346	0.000225825	0.102438	up	yes
MSTRG.34962	HHC053479	MSTRG.34962.1;rna-HHC053479.1;MSTRG.34962.3	GO:0004722(protein serine/threonine phosphatase activity);GO:0005575(cellular_component);GO:0006470(protein dephosphorylation);GO:0046872(metal ion binding)	NA	NA	NA	probable protein phosphatase 2C 15 [Asparagus officinalis]	NA	0.17336	0.258248	1.06549	1.02903	12.878	1.32947	0.0889016	-3.49165	0.000235304	0.105234	down	yes
MSTRG.35823	HHC049172	rna-HHC049172.1	GO:0003735(structural constituent of ribosome);GO:0006412(translation);GO:0022625(cytosolic large ribosomal subunit)	03010(Ribosome)	K02889	NA	60S ribosomal protein L21-1 [Ananas comosus]	NA	57.1265	0.499628	73.0082	31.0475	1.39335	1.54504	27.512	4.78199	0.000246252	0.108601	up	yes
MSTRG.7231	HHC044822	rna-HHC044822.1	GO:0003677(DNA binding);GO:0003700(DNA binding transcription factor activity);GO:0005622(intracellular);GO:0005634(nucleus);GO:0006351(transcription, DNA-templated);GO:0006355(regulation of transcription, DNA-templated);GO:0006952(defense response);GO:0009867(jasmonic acid mediated signaling pathway);GO:0009873(ethylene-activated signaling pathway)	04016(MAPK signaling pathway - plant);04075(Plant hormone signal transduction)	K14516	NA	PREDICTED: ethylene-responsive transcription factor 1B-like [Eucalyptus grandis]	NA	3.17334	5.65654	5.429	0.262647	0.196865	0.0001	36.8632	5.20411	0.000253593	0.110306	up	yes
MSTRG.29549		MSTRG.29549.1	NA	NA	NA	NA		NA	0.430078	19.7305	2.39477	0.0001	0.0001	0.0001	56388.7	15.7831	0.000262412	0.1126	up	yes
MSTRG.31809	HHC052087;HHC052090;HHC052092;HHC052088	MSTRG.31809.4;MSTRG.31809.1;rna-HHC052087.1;rna-HHC052090.1;MSTRG.31809.3;MSTRG.31809.2;rna-HHC052092.1;rna-HHC052088.1	GO:0003674(molecular_function);GO:0005575(cellular_component);GO:0008150(biological_process);GO:0008150(biological_process)	NA	NA	NA	hypothetical protein MA16_Dca009435 [Dendrobium catenatum];hypothetical protein CR513_57888, partial [Mucuna pruriens];hypothetical protein BVC80_7377g1 [Macleaya cordata]	NA	8.03396	8.41893	4.32448	12.97	8.58668	95.4647	0.162167	-2.62445	0.000272583	0.115404	down	yes
MSTRG.33100		MSTRG.33100.1	NA	NA	NA	NA		NA	51.8174	49.7347	19.0869	4.96661	2.94269	4.73704	8.17773	3.0317	0.000295497	0.121995	up	yes
MSTRG.25696	HHC031449	rna-HHC031449.1	NA	NA	NA	NA	PREDICTED: uncharacterized protein LOC105060151 [Elaeis guineensis]	NA	39.5101	21.7075	12.1592	0.3991	0.183652	0.887488	34.4381	5.10593	0.000295835	0.121995	up	yes
MSTRG.31176	HHC039813	rna-HHC039813.1	NA	NA	NA	NA	PREDICTED: uncharacterized protein LOC105060558 [Elaeis guineensis]	NA	0.0001	93.9894	7.01339	0.592737	0.0001	0.0001	253989	17.9544	0.000315251	0.127773	up	yes
MSTRG.20989	HHC024219;HHC024220	rna-HHC024219.1;MSTRG.20989.3;MSTRG.20989.1;rna-HHC024220.1	GO:0003959(NADPH dehydrogenase activity);GO:0005622(intracellular);GO:0055114(oxidation-reduction process);GO:0055114(oxidation-reduction process)	00592(alpha-Linolenic acid metabolism);00592(alpha-Linolenic acid metabolism)	K05894	EC:1.3.1.42	uncharacterized protein A4U43_C04F28030 [Asparagus officinalis]	NA	18.3722	113.865	90.7678	9.61275	4.72304	7.07129	9.86142	3.3018	0.000319045	0.127773	up	yes
MSTRG.4843		MSTRG.4843.1	NA	NA	NA	NA		NA	0.337353	16.8045	15.9746	0.0936647	0.113307	0.0560173	98.0668	6.61569	0.000321917	0.127773	up	yes
MSTRG.11105	HHC010139	rna-HHC010139.1	NA	NA	NA	NA	PREDICTED: uncharacterized protein LOC108871161, partial [Brassica rapa]	NA	115.824	381.961	217.312	18.1719	18.6861	18.0865	9.97033	3.31764	0.000327067	0.12783	up	yes
MSTRG.35679		MSTRG.35679.1	NA	NA	NA	NA		NA	27.9239	37.3954	25.0291	7.72935	5.07641	5.58936	4.59778	2.20094	0.000330112	0.12783	up	yes
MSTRG.32860	HHC050797;HHC050798	MSTRG.32860.2;MSTRG.32860.4;rna-HHC050798.1;rna-HHC050797.1;MSTRG.32860.3	NA	NA	NA	NA	uncharacterized protein LOC103705077 [Phoenix dactylifera]	NA	30.5377	35.8494	1.72449	4.47938	0.91985	0.978608	19.1184	4.25689	0.00037266	0.142567	up	yes
MSTRG.26604	HHC032949	MSTRG.26604.2;MSTRG.26604.1	NA	NA	NA	NA		NA	78.3144	23.8092	26.3422	0.202842	0.0001	0.74191	86.7028	6.43801	0.000380216	0.143726	up	yes
MSTRG.24735	HHC029889	MSTRG.24735.1	NA	NA	NA	NA		NA	2.5233	0.0001	6.27788	5.47019	0.0001	0.0001	35678.7	15.1228	0.000421834	0.157582	up	yes
MSTRG.23228	HHC027873;HHC027877	rna-HHC027873.1;rna-HHC027877.1;MSTRG.23228.1	GO:0005515(protein binding);GO:0009507(chloroplast);GO:0009523(photosystem II);GO:0009534(chloroplast thylakoid);GO:0009535(chloroplast thylakoid membrane);GO:0009579(thylakoid);GO:0009654(photosystem II oxygen evolving complex);GO:0009735(response to cytokinin);GO:0010270(photosystem II oxygen evolving complex assembly);GO:0015979(photosynthesis);GO:0015979(photosynthesis)	00195(Photosynthesis);00195(Photosynthesis)	K03541	NA	chloroplast photosystem II 10 kDa protein [Agave tequilana]	NA	76.4568	31.7825	7.97919	2.01668	1.90045	1.92397	15.4579	3.95027	0.000440537	0.162656	up	yes
MSTRG.10122		MSTRG.10122.1	NA	NA	NA	NA		NA	0.280263	0.0820133	0.717074	0.217419	2.6076	4.8252	0.0872329	-3.51898	0.000458097	0.165356	down	yes
MSTRG.2912	HHC004073	rna-HHC004073.1;rna-HHC004073.2;rna-HHC004073.3	GO:0000209(protein polyubiquitination);GO:0043161(proteasome-mediated ubiquitin-dependent protein catabolic process);GO:0061630(ubiquitin protein ligase activity);GO:0061630(ubiquitin protein ligase activity)	NA	NA	NA	E3 ubiquitin-protein ligase RING1 [Apostasia shenzhenica]	NA	22.0447	23.7617	54.7092	11.9683	77.9496	215.398	0.191725	-2.38289	0.000458265	0.165356	down	yes
MSTRG.28972	HHC036564	MSTRG.28972.2;rna-HHC036564.1	GO:0006855(drug transmembrane transport)	NA	NA	NA	PREDICTED: protein DETOXIFICATION 42-like [Elaeis guineensis]	NA	150.473	110.894	7.97747	10.5189	4.86375	5.34097	13.7125	3.77742	0.000480423	0.170319	up	yes
MSTRG.14645	HHC015265;HHC015264	rna-HHC015265.2;rna-HHC015264.1;rna-HHC015265.1;rna-HHC015265.3;MSTRG.14645.2	GO:0004553(hydrolase activity, hydrolyzing O-glycosyl compounds);GO:0030247(polysaccharide binding);GO:0046658(anchored component of plasma membrane);GO:0046658(anchored component of plasma membrane)	00500(Starch and sucrose metabolism);00500(Starch and sucrose metabolism)	K19891	EC:3.2.1.39	glucan endo-1,3-beta-glucosidase-like isoform X1 [Ananas comosus];PREDICTED: glucan endo-1,3-beta-glucosidase [Elaeis guineensis]	NA	25.6139	5.64516	1.46098	1.10693	0.590721	0.509552	15.3721	3.94224	0.000482749	0.170319	up	yes
MSTRG.32053	HHC054290	MSTRG.32053.1;rna-HHC054290.1	GO:0005886(plasma membrane);GO:0016324(apical plasma membrane);GO:0051819(induction by symbiont of nodulation, tumor or growth in host)	NA	NA	NA	flotillin-like protein 1 [Asparagus officinalis]	NA	37.2416	10.1877	0.238242	0.368541	0.152937	0.187976	70.4521	6.13857	0.00050072	0.174718	up	yes
MSTRG.21882	HHC025568	rna-HHC025568.1	GO:0005509(calcium ion binding)	NA	NA	NA	Calcium-binding protein CML24 [Apostasia shenzhenica]	NA	24.1603	62.9503	9.1259	3.09485	1.92058	0.460368	20.8596	4.38264	0.000543063	0.187434	up	yes
MSTRG.2779	HHC003861	rna-HHC003861.1;rna-HHC003861.2;MSTRG.2779.1	GO:0002213(defense response to insect);GO:0004357(glutamate-cysteine ligase activity);GO:0005524(ATP binding);GO:0006750(glutathione biosynthetic process);GO:0009408(response to heat);GO:0009507(chloroplast);GO:0009536(plastid);GO:0009570(chloroplast stroma);GO:0009700(indole phytoalexin biosynthetic process);GO:0009753(response to jasmonic acid);GO:0009816(defense response to bacterium, incompat…	00270(Cysteine and methionine metabolism);00480(Glutathione metabolism);00480(Glutathione metabolism)	K01919	EC:6.3.2.2	glutamate--cysteine ligase, chloroplastic [Asparagus officinalis]	NA	49.0956	53.5162	20.9526	7.50503	4.95368	5.52409	6.25464	2.64493	0.000565709	0.192831	up	yes
MSTRG.770	HHC000932	rna-HHC000932.3;rna-HHC000932.1;rna-HHC000932.2	GO:0003674(molecular_function);GO:0006950(response to stress);GO:0009535(chloroplast thylakoid membrane);GO:0009535(chloroplast thylakoid membrane)	NA	NA	NA	putative plastid-lipid-associated protein 2, chloroplastic [Ananas comosus];probable plastid-lipid-associated protein 2, chloroplastic [Asparagus officinalis]	NA	143.918	33.97	45.6567	5.1813	4.98085	6.04904	10.3685	3.37413	0.000570847	0.192831	up	yes
MSTRG.11824		MSTRG.11824.3;MSTRG.11824.2;MSTRG.11824.4;MSTRG.11824.1	NA	NA	NA	NA		NA	5198.67	1131.93	150.254	39.8651	37.9898	47.494	38.1401	5.25324	0.00058533	0.193473	up	yes
MSTRG.36273		MSTRG.36273.1	NA	NA	NA	NA		NA	0.129206	15.3568	9.03057	0.0001	0.0001	0.0001	61291.8	15.9034	0.000588234	0.193473	up	yes
MSTRG.34931	HHC054205	rna-HHC054205.1	GO:0009908(flower development);GO:0048262(determination of dorsal/ventral asymmetry)	NA	NA	NA	PREDICTED: protein RADIALIS-like 3 [Musa acuminata subsp. malaccensis]	NA	23.315	64.0214	3.73177	1.62844	1.33552	0.393333	26.8086	4.74463	0.000591026	0.193473	up	yes
MSTRG.29966	HHC038065;HHC038063	rna-HHC038065.1;rna-HHC038063.1;MSTRG.29966.1	GO:0003674(molecular_function);GO:0005783(endoplasmic reticulum);GO:0008150(biological_process);GO:0008150(biological_process)	NA	NA	NA	uncharacterized protein LOC109849192 [Asparagus officinalis]	NA	75.6725	5.41356	15.1271	1.8091	1.765	1.05039	17.4083	4.1217	0.000617462	0.200064	up	yes
MSTRG.32549	HHC051223	rna-HHC051223.1;MSTRG.32549.2	GO:0005524(ATP binding);GO:0005618(cell wall);GO:0005634(nucleus);GO:0009409(response to cold);GO:0009416(response to light stimulus);GO:0009507(chloroplast);GO:0009535(chloroplast thylakoid membrane);GO:0009570(chloroplast stroma);GO:0009579(thylakoid);GO:0009753(response to jasmonic acid);GO:0009941(chloroplast envelope);GO:0010150(leaf senescence);GO:0010287(plastoglobule);GO:0010319(stromule)…	03010(Ribosome)	K02960	NA	PREDICTED: ribulose bisphosphate carboxylase/oxygenase activase 2, chloroplastic isoform X1 [Elaeis guineensis]	NA	1941.86	1000.45	730.149	778.014	287.846	292.864	3.83193	1.93807	0.000633385	0.20315	up	yes
MSTRG.7208	HHC044801;HHC044806;HHC044803	rna-HHC044801.1;rna-HHC044806.1;rna-HHC044806.2;rna-HHC044806.3;MSTRG.7208.1	GO:0003674(molecular_function);GO:0005575(cellular_component);GO:0008150(biological_process)	NA	NA	NA	PREDICTED: protein SRC2 [Elaeis guineensis]	NA	713.717	60.1773	626.423	20.2739	21.2421	22.0807	16.3954	4.03522	0.000639824	0.203163	up	yes
MSTRG.20401	HHC023292	MSTRG.20401.2;rna-HHC023292.1	GO:0003839(gamma-glutamylcyclotransferase activity);GO:0005737(cytoplasm);GO:0006751(glutathione catabolic process);GO:0016829(lyase activity)	00480(Glutathione metabolism)	K22596	EC:4.3.2.9	gamma-glutamylcyclotransferase 2-2-like [Asparagus officinalis]	NA	9.46777	60.5337	78.7894	3.0789	2.6488	3.52067	12.3082	3.62154	0.000661626	0.204978	up	yes
MSTRG.3933	HHC005821	rna-HHC005821.1	GO:0003674(molecular_function);GO:0005575(cellular_component);GO:0008150(biological_process)	NA	NA	NA	PREDICTED: protein SRC2 [Elaeis guineensis]	NA	14.3541	7.39026	0.738902	1.78634	0.0001	0.228335	53.1214	5.73122	0.000662329	0.204978	up	yes
MSTRG.7320	HHC044961	rna-HHC044961.1;rna-HHC044961.2	NA	NA	NA	NA	uncharacterized protein LOC109850629 [Asparagus officinalis]	NA	298.87	98.0323	29.4652	5.74086	5.99991	7.64635	15.8325	3.98482	0.000664907	0.204978	up	yes
MSTRG.32215	HHC047773	MSTRG.32215.2;rna-HHC047773.1	GO:0000287(magnesium ion binding);GO:0004427(inorganic diphosphatase activity);GO:0005634(nucleus);GO:0005737(cytoplasm);GO:0005829(cytosol);GO:0006796(phosphate-containing compound metabolic process);GO:0016020(membrane);GO:0019915(lipid storage)	00190(Oxidative phosphorylation)	K01507	EC:3.6.1.1	PREDICTED: soluble inorganic pyrophosphatase [Elaeis guineensis]	NA	77.9734	98.8583	59.2648	64.6513	25.5052	23.3206	3.07981	1.62284	0.00069763	0.212999	up	yes
MSTRG.9864	HHC008139	rna-HHC008139.1	GO:0005886(plasma membrane);GO:0006810(transport);GO:0022857(transmembrane transporter activity)	NA	NA	NA	WAT1-related protein At5g07050-like [Asparagus officinalis]	NA	395.207	196.568	3.15762	3.05452	2.24892	3.22643	54.6073	5.77102	0.000715801	0.216465	up	yes
MSTRG.33016	HHC047417	MSTRG.33016.2;rna-HHC047417.1	GO:0005575(cellular_component);GO:0016491(oxidoreductase activity);GO:0055114(oxidation-reduction process)	00061(Fatty acid biosynthesis);01040(Biosynthesis of unsaturated fatty acids);00780(Biotin metabolism);00333(Prodigiosin biosyntheses)	K00059	EC:1.1.1.100	uncharacterized protein LOC103720253 [Phoenix dactylifera]	NA	328.118	94.4805	19.8941	15.4426	10.2211	8.16559	12.4529	3.63841	0.000751146	0.225011	up	yes
MSTRG.5098		MSTRG.5098.1	NA	NA	NA	NA		NA	0.0001	1.31583	1.10013	2.54371	0.0001	0.0001	12399.4	13.598	0.000786341	0.233352	up	yes
MSTRG.30908	HHC039455	MSTRG.30908.2;rna-HHC039455.1	GO:0005887(integral component of plasma membrane);GO:0015204(urea transmembrane transporter activity);GO:0015293(symporter activity)	NA	NA	NA	urea-proton symporter DUR3 [Asparagus officinalis]	NA	3.89573	2.16315	0.402769	0.213793	0.144921	0.135991	11.8817	3.57067	0.000831442	0.244452	up	yes
MSTRG.9511	HHC007391	rna-HHC007391.2;rna-HHC007391.1	GO:0005543(phospholipid binding);GO:0012505(endomembrane system);GO:0019898(extrinsic component of membrane);GO:0019898(extrinsic component of membrane)	NA	NA	NA	BEACH domain-containing protein C2-like isoform X2 [Asparagus officinalis];BEACH domain-containing protein C2-like isoform X1 [Phoenix dactylifera]	NA	27.2154	27.5724	27.245	34.9232	11.2447	9.74279	2.78632	1.47836	0.000841413	0.245114	up	yes
MSTRG.30559	HHC039000	rna-HHC039000.1	GO:0005515(protein binding);GO:0005737(cytoplasm);GO:0009408(response to heat);GO:0009644(response to high light intensity);GO:0010286(heat acclimation);GO:0042542(response to hydrogen peroxide)	04141(Protein processing in endoplasmic reticulum)	K13993	NA	18.0 kDa class I heat shock protein-like [Asparagus officinalis]	NA	64.9015	43.4951	8.12767	1.92728	1.99745	2.9941	11.8652	3.56867	0.000862336	0.247137	up	yes
MSTRG.36204	HHC053234	rna-HHC053234.1	GO:0003674(molecular_function);GO:0005739(mitochondrion);GO:0008150(biological_process);GO:0016021(integral component of membrane)	NA	NA	NA	PREDICTED: uncharacterized protein LOC105046287 [Elaeis guineensis]	NA	8.51575	9.16624	6.80143	3.6296	1.8351	1.70581	3.96975	1.98905	0.000863923	0.247137	up	yes
MSTRG.27382		MSTRG.27382.1	NA	NA	NA	NA		NA	54.9397	46.2947	53.6229	8.7036	6.54176	10.3325	4.84646	2.27693	0.000917877	0.260226	up	yes
MSTRG.11053	HHC010063	MSTRG.11053.2;MSTRG.11053.1	NA	NA	NA	NA		NA	6.5687	1.71961	1.33711	0.282436	0.0518667	0.208988	18.9911	4.24725	0.000954058	0.266711	up	yes
MSTRG.35329	HHC051274	MSTRG.35329.1;rna-HHC051274.1	GO:0003677(DNA binding);GO:0003700(DNA binding transcription factor activity);GO:0005634(nucleus);GO:0006351(transcription, DNA-templated);GO:0006355(regulation of transcription, DNA-templated);GO:0007275(multicellular organism development);GO:0009611(response to wounding);GO:0009788(negative regulation of abscisic acid-activated signaling pathway)	NA	NA	NA	NAC domain-containing protein 48-like [Phoenix dactylifera]	NA	12.5988	2.64144	8.24658	0.712217	0.73544	0.733727	8.23564	3.04188	0.00095755	0.266711	up	yes
MSTRG.13961	HHC014331	rna-HHC014331.1;MSTRG.13961.2	GO:0005634(nucleus);GO:0016567(protein ubiquitination)	NA	NA	NA	F-box protein [Cinnamomum micranthum f. kanehirae]	NA	36.4125	16.4348	11.5563	5.32494	3.89629	3.5318	4.69357	2.23069	0.00100715	0.27487	up	yes
MSTRG.31941		MSTRG.31941.1	NA	NA	NA	NA		NA	90.8024	21.5246	1.26068	0.378554	0.643973	0.584729	46.3767	5.53533	0.00101091	0.27487	up	yes
MSTRG.12550	HHC012078	rna-HHC012078.1	GO:0005575(cellular_component);GO:0009813(flavonoid biosynthetic process);GO:0016210(naringenin-chalcone synthase activity)	00941(Flavonoid biosynthesis);04712(Circadian rhythm - plant)	K00660	EC:2.3.1.74	chalcone synthase [Narcissus tazetta subsp. chinensis]	NA	54.4182	532.887	63.5807	9.1044	11.7637	8.69136	16.1327	4.01192	0.00102929	0.27487	up	yes
MSTRG.16554	HHC017741	MSTRG.16554.1	NA	NA	NA	NA		NA	0.0001	23.3855	19.164	0.0001	0.0001	0.0001	106374	16.6988	0.00103013	0.27487	up	yes
MSTRG.19450	HHC021959	MSTRG.19450.1;rna-HHC021959.1	GO:0003674(molecular_function);GO:0005634(nucleus);GO:0008150(biological_process)	NA	NA	NA	hypothetical protein CCACVL1_14897 [Corchorus capsularis]	NA	0.765987	0.710455	1.82021	0.396298	0.167994	0.136831	6.05749	2.59872	0.00103171	0.27487	up	yes
MSTRG.8128	HHC046497	MSTRG.8128.1;rna-HHC046497.1	GO:0004497(monooxygenase activity);GO:0005783(endoplasmic reticulum);GO:0007275(multicellular organism development);GO:0010268(brassinosteroid homeostasis);GO:0016125(sterol metabolic process);GO:0016132(brassinosteroid biosynthetic process)	00905(Brassinosteroid biosynthesis)	K09587	EC:1.14.13.-	PREDICTED: cytochrome P450 90B1-like [Elaeis guineensis]	NA	8.1248	1.85597	0.336458	0.0001	0.0001	0.0001	25793.3	14.6547	0.00104729	0.27487	up	yes
MSTRG.25849	HHC031745	MSTRG.25849.2;rna-HHC031745.1	GO:0004842(ubiquitin-protein transferase activity);GO:0016567(protein ubiquitination)	04141(Protein processing in endoplasmic reticulum);04120(Ubiquitin mediated proteolysis)	K06689	EC:2.3.2.23	ubiquitin-conjugating enzyme E2-17 kDa-like [Asparagus officinalis]	NA	0.311395	0.345881	7.03772	10.9855	0.183984	0.120336	30.6922	4.9398	0.00104744	0.27487	up	yes
MSTRG.23986	HHC028878	rna-HHC028878.1	GO:0004124(cysteine synthase activity);GO:0005737(cytoplasm);GO:0006535(cysteine biosynthetic process from serine);GO:0030170(pyridoxal phosphate binding)	00920(Sulfur metabolism);00270(Cysteine and methionine metabolism)	K01738	EC:2.5.1.47	cysteine synthase [Phoenix dactylifera]	NA	354.41	256.341	138.818	32.9132	30.2249	37.8544	5.74685	2.52277	0.00106193	0.275119	up	yes
MSTRG.19644	HHC022259	MSTRG.19644.1;rna-HHC022259.1	GO:0051213(dioxygenase activity)	00940(Phenylpropanoid biosynthesis)	K06892	EC:1.14.11.-	protein DMR6-LIKE OXYGENASE 2 [Ananas comosus]	NA	10.739	87.7081	172.541	7.70592	5.87204	5.99794	11.7394	3.55329	0.00106878	0.275119	up	yes
MSTRG.13734		MSTRG.13734.1	NA	NA	NA	NA		NA	0.250534	9.31482	4.1788	0.0001	0.0001	0.0001	34360.6	15.0685	0.00107438	0.275119	up	yes
MSTRG.21135		MSTRG.21135.1	NA	NA	NA	NA		NA	2.63262	1.14595	1.94151	0.963463	0.193186	0.14383	9.91577	3.30972	0.00113594	0.286476	up	yes
MSTRG.6528	HHC043969;HHC043968	MSTRG.6528.5;MSTRG.6528.1;rna-HHC043969.1;rna-HHC043968.1;MSTRG.6528.3	GO:0006855(drug transmembrane transport);GO:0006855(drug transmembrane transport)	NA	NA	NA	PREDICTED: protein DETOXIFICATION 42-like [Elaeis guineensis];protein DETOXIFICATION 42-like [Asparagus officinalis]	NA	40.5984	44.0359	0.607667	0.511007	0.505109	0.697643	35.6486	5.15578	0.00113678	0.286476	up	yes
MSTRG.27275		MSTRG.27275.1	NA	NA	NA	NA		NA	0.586535	45.2552	7.1369	0.0001	0.0001	0.0001	132447	17.0151	0.00117065	0.29269	up	yes
gene-HHC014782	HHC014782	rna-HHC014782.1	GO:0003954(NADH dehydrogenase activity);GO:0005886(plasma membrane);GO:0016021(integral component of membrane);GO:0051536(iron-sulfur cluster binding)	03018(RNA degradation)	K12580	NA	CASP-like protein 4C1 [Dendrobium catenatum]	NA	2.09714	1.51716	2.41375	2.82616	0.370033	0.368899	5.99123	2.58285	0.00118266	0.293383	up	yes
MSTRG.29419	HHC037186	rna-HHC037186.1	GO:0005385(zinc ion transmembrane transporter activity);GO:0005886(plasma membrane);GO:0071577(zinc II ion transmembrane transport)	NA	NA	NA	Zinc transporter 6, chloroplastic [Dendrobium catenatum]	NA	53.4454	22.8216	21.7747	9.58835	6.53866	5.62216	4.42528	2.14577	0.00123199	0.301214	up	yes
MSTRG.8392	HHC046923;HHC046922	MSTRG.8392.5;MSTRG.8392.7;rna-HHC046923.7;MSTRG.8392.2;rna-HHC046923.3;rna-HHC046923.8;MSTRG.8392.3;MSTRG.8392.19;rna-HHC046923.4;rna-HHC046923.6;MSTRG.8392.6;MSTRG.8392.20;rna-HHC046923.2;rna-HHC046923.9;rna-HHC046923.5;MSTRG.8392.1;rna-HHC046923.1;MSTRG.8392.11;MSTRG.8392.8;MSTRG.8392.4	GO:0008422(beta-glucosidase activity);GO:1901657(glycosyl compound metabolic process);GO:0009651(response to salt stress);GO:0009725(response to hormone);GO:0019762(glucosinolate catabolic process);GO:0019762(glucosinolate catabolic process)	00500(Starch and sucrose metabolism);00460(Cyanoamino acid metabolism);00940(Phenylpropanoid biosynthesis);00940(Phenylpropanoid biosynthesis)	K01188	EC:3.2.1.21	beta-glucosidase 12-like [Asparagus officinalis]	NA	0.0001	320.613	17.2562	0.0001	0.0001	0.0001	844674	19.688	0.00123628	0.301214	up	yes
MSTRG.16621	HHC017830	rna-HHC017830.2;rna-HHC017830.1	GO:0003674(molecular_function);GO:0005739(mitochondrion);GO:0008150(biological_process);GO:0008150(biological_process)	NA	NA	NA	EID1-like F-box protein 2 [Asparagus officinalis]	NA	23.8291	20.4753	24.3851	12.5202	6.04243	0.3453	6.35669	2.66828	0.00124269	0.301214	up	yes
MSTRG.18226	HHC020351	rna-HHC020351.1	GO:0005086(ARF guanyl-nucleotide exchange factor activity);GO:0005802(trans-Golgi network);GO:0016192(vesicle-mediated transport)	00561(Glycerolipid metabolism)	K00679	EC:2.3.1.158	GDSL esterase/lipase At5g55050-like [Asparagus officinalis]	NA	1.40824	0.842409	0.0001	0.290364	0.0001	0.0001	6352.77	12.6332	0.0013254	0.316562	up	yes
MSTRG.14698	HHC015352	rna-HHC015352.1	GO:0003743(translation initiation factor activity);GO:0003746(translation elongation factor activity);GO:0003924(GTPase activity);GO:0005525(GTP binding);GO:0005634(nucleus);GO:0006413(translational initiation);GO:0006414(translational elongation);GO:0046872(metal ion binding)	03015(mRNA surveillance pathway)	K14416	NA	PREDICTED: flowering-promoting factor 1-like protein 3 [Musa acuminata subsp. malaccensis]	NA	12.1762	7.03101	0.311402	0.441646	0.200347	0.0001	49.7894	5.63777	0.0013274	0.316562	up	yes
MSTRG.29141	HHC036774	MSTRG.29141.1;rna-HHC036774.1	GO:0005794(Golgi apparatus);GO:0005886(plasma membrane);GO:0016021(integral component of membrane);GO:0019706(protein-cysteine S-palmitoyltransferase activity);GO:0030659(cytoplasmic vesicle membrane)	NA	NA	NA	probable protein S-acyltransferase 22 [Asparagus officinalis]	NA	10.6526	15.2098	19.1845	13.8003	43.3628	47.6313	0.323358	-1.6288	0.00133592	0.316562	down	yes
MSTRG.12312	HHC011766	MSTRG.12312.1	NA	NA	NA	NA		NA	3.64007	1.7259	5.13185	0.714856	0.0846158	0.517801	9.30641	3.21823	0.00138533	0.324409	up	yes
MSTRG.32093	HHC049294	rna-HHC049294.1	GO:0003674(molecular_function);GO:0005575(cellular_component);GO:0008150(biological_process)	NA	NA	NA	hypothetical protein BRARA_C02635 [Brassica rapa]	NA	289.479	1050.73	643.349	94.9099	91.7882	87.9605	5.7816	2.53147	0.00138946	0.324409	up	yes
MSTRG.11052	HHC010063	MSTRG.11052.1	NA	NA	NA	NA		NA	9.07026	3.42303	1.31647	0.943965	0.497869	0.479226	7.54978	2.91644	0.00140841	0.326433	up	yes
MSTRG.36208	HHC053238	rna-HHC053238.1	GO:0005215(transporter activity);GO:0005886(plasma membrane);GO:0006807(nitrogen compound metabolic process);GO:0006857(oligopeptide transport);GO:0009506(plasmodesma);GO:0015031(protein transport);GO:0016020(membrane);GO:0016021(integral component of membrane);GO:0022857(transmembrane transporter activity);GO:0042937(tripeptide transmembrane transporter activity);GO:0042938(dipeptide transport);…	NA	NA	NA	Protein NRT1/ PTR FAMILY 8.1 [Ananas comosus]	NA	49.5654	22.5405	35.1416	8.82275	6.20105	8.13353	4.04861	2.01743	0.0014542	0.334602	up	yes
gene-HHC034463	HHC034463	rna-HHC034463.1	GO:0005737(cytoplasm);GO:0030001(metal ion transport);GO:0046914(transition metal ion binding);GO:0046916(cellular transition metal ion homeostasis)	NA	NA	NA	heavy metal-associated isoprenylated plant protein 5-like isoform X1 [Asparagus officinalis]	NA	1.08078	0.508298	0.195535	0.0001	0.0001	0.0001	4461.79	12.1234	0.00148137	0.336743	up	yes
MSTRG.30693	HHC039170	rna-HHC039170.1	GO:0030173(integral component of Golgi membrane);GO:0030176(integral component of endoplasmic reticulum membrane);GO:0046964(3'-phosphoadenosine 5'-phosphosulfate transmembrane transporter activity)	NA	NA	NA	PREDICTED: UDP-galactose/UDP-glucose transporter 4-like [Nelumbo nucifera]	NA	38.0397	25.5557	11.5019	3.86411	3.06496	3.67907	5.85417	2.54947	0.00149397	0.336743	up	yes
MSTRG.26901	HHC033390	MSTRG.26901.1;rna-HHC033390.1	GO:0000302(response to reactive oxygen species);GO:0004322(ferroxidase activity);GO:0005506(iron ion binding);GO:0005739(mitochondrion);GO:0006826(iron ion transport);GO:0006879(cellular iron ion homeostasis);GO:0006880(intracellular sequestering of iron ion);GO:0008199(ferric iron binding);GO:0009507(chloroplast);GO:0009570(chloroplast stroma);GO:0009908(flower development);GO:0009941(chloroplas…	NA	NA	NA	ferritin-4, chloroplastic-like [Asparagus officinalis]	NA	233.358	223.389	275.943	48.2194	43.0751	49.4263	4.22107	2.07761	0.00149532	0.336743	up	yes
gene-HHC022321	HHC022321	rna-HHC022321.1	GO:0004106(chorismate mutase activity);GO:0005829(cytosol);GO:0009073(aromatic amino acid family biosynthetic process);GO:0009507(chloroplast);GO:0009536(plastid);GO:0016688(L-ascorbate peroxidase activity);GO:0046417(chorismate metabolic process);GO:0055114(oxidation-reduction process);GO:0098869(cellular oxidant detoxification)	00400(Phenylalanine, tyrosine and tryptophan biosynthesis)	K01850	EC:5.4.99.5	chorismate mutase 1, chloroplastic-like [Asparagus officinalis]	NA	0.972855	0.893872	0.130085	0.0001	0.0001	0.0001	4992.28	12.2855	0.00154055	0.344197	up	yes
MSTRG.15615		MSTRG.15615.1	NA	NA	NA	NA		NA	36.2087	33.9706	11.6027	3.43575	2.73457	4.36888	5.99833	2.58456	0.00155463	0.344197	up	yes
MSTRG.29360	HHC037075	MSTRG.29360.2;rna-HHC037075.1	GO:0001666(response to hypoxia);GO:0003677(DNA binding);GO:0003700(DNA binding transcription factor activity);GO:0005515(protein binding);GO:0005634(nucleus);GO:0006351(transcription, DNA-templated);GO:0006355(regulation of transcription, DNA-templated);GO:0007275(multicellular organism development);GO:0009507(chloroplast);GO:0019760(glucosinolate metabolic process);GO:0043565(sequence-specific D…	NA	NA	NA	transcription factor NACa [Narcissus tazetta]	NA	39.2454	51.0155	26.4515	9.89478	8.11017	4.2636	5.11595	2.355	0.00156093	0.344197	up	yes
MSTRG.25698	HHC031458	rna-HHC031458.1	GO:0015292(uniporter activity)	NA	NA	NA	calcium uniporter protein 2, mitochondrial-like [Asparagus officinalis]	NA	135.781	82.9802	0.60745	0.906363	0.920034	1.35474	48.4169	5.59744	0.00158574	0.3461	up	yes
MSTRG.26215		MSTRG.26215.1	NA	NA	NA	NA		NA	0.184313	11.7812	2.04326	0.0001	0.0001	0.0001	35022.2	15.096	0.00159331	0.3461	up	yes
MSTRG.11991	HHC011387	rna-HHC011387.1;MSTRG.11991.2	GO:0005886(plasma membrane);GO:0016021(integral component of membrane);GO:0042626(ATPase activity, coupled to transmembrane movement of substances)	02010(ABC transporters)	K05681	NA	uncharacterized protein A4U43_C01F20830 [Asparagus officinalis]	NA	16.0422	1.08878	0.0001	0.0001	0.0001	0.0001	42828.1	15.3863	0.00160227	0.3461	up	yes
MSTRG.33501		MSTRG.33501.1	NA	NA	NA	NA		NA	0.0001	0.656049	0.784092	3.11189	10.4678	14.6811	0.0905033	-3.46589	0.00162211	0.34802	down	yes
MSTRG.7009	HHC044624	MSTRG.7009.1	NA	NA	NA	NA		NA	27.0694	27.3898	0.0001	1.08764	0.0001	0.100777	275.32	8.10497	0.00165032	0.351695	up	yes
MSTRG.24601	HHC029688	rna-HHC029688.1	GO:0003677(DNA binding);GO:0003713(transcription coactivator activity);GO:0005515(protein binding);GO:0005634(nucleus);GO:0005667(transcription factor complex);GO:0006351(transcription, DNA-templated);GO:0006355(regulation of transcription, DNA-templated);GO:0060261(positive regulation of transcription initiation from RNA polymerase II promoter)	NA	NA	NA	RNA polymerase II transcriptional coactivator KELP [Asparagus officinalis]	NA	2.73847	1.96242	0.976345	0.527816	0.0811556	0.149392	13.4572	3.7503	0.00166455	0.352363	up	yes
MSTRG.11367	HHC010519	rna-HHC010519.1;MSTRG.11367.1	GO:0006457(protein folding);GO:0009507(chloroplast)	NA	NA	NA	uncharacterized protein LOC109843787 isoform X1 [Asparagus officinalis]	NA	51.7224	25.4938	0.366922	0.479984	0.701819	0.399466	35.4418	5.14738	0.00170186	0.357875	up	yes
MSTRG.21325	HHC024847	rna-HHC024847.1	GO:0006364(rRNA processing);GO:0030687(preribosome, large subunit precursor)	NA	NA	NA	PREDICTED: coiled-coil domain-containing protein 86 [Prunus mume]	NA	11.1594	8.67151	10.69	4.55031	2.23566	2.7645	3.50701	1.81024	0.00173646	0.359555	up	yes
MSTRG.561	HHC000612	MSTRG.561.1;rna-HHC000612.1	NA	NA	NA	NA	Metallothionein 3a [Dracaena cambodiana]	NA	5926.33	1980.24	465.911	217.039	221.025	202.656	10.1368	3.34153	0.00174304	0.359555	up	yes
MSTRG.12100	HHC011490	rna-HHC011490.1;rna-HHC011490.2;rna-HHC011490.3	GO:0005886(plasma membrane);GO:0016021(integral component of membrane);GO:0042626(ATPase activity, coupled to transmembrane movement of substances);GO:0042626(ATPase activity, coupled to transmembrane movement of substances)	02010(ABC transporters);02010(ABC transporters)	K05681	NA	ABC transporter G family member 39-like [Asparagus officinalis]	NA	62.113	4.48923	0.123816	0.19695	0.15908	0.0001	210.212	7.7157	0.00174382	0.359555	up	yes
MSTRG.12311	HHC011765	MSTRG.12311.3;rna-HHC011765.1;MSTRG.12311.1;MSTRG.12311.4;MSTRG.12311.5	GO:0004601(peroxidase activity);GO:0009505(plant-type cell wall);GO:0009507(chloroplast);GO:0009536(plastid);GO:0009570(chloroplast stroma);GO:0009579(thylakoid);GO:0009941(chloroplast envelope);GO:0016209(antioxidant activity);GO:0042742(defense response to bacterium);GO:0045454(cell redox homeostasis);GO:0051920(peroxiredoxin activity);GO:0055114(oxidation-reduction process)	NA	NA	NA	PREDICTED: peroxiredoxin-2E-1, chloroplastic [Elaeis guineensis]	NA	16.8716	9.60263	29.1517	5.12685	2.95848	4.40865	4.12323	2.04378	0.00178068	0.364787	up	yes
MSTRG.4844		MSTRG.4844.2;MSTRG.4844.1	NA	NA	NA	NA		NA	0.0001	19.5457	7.12339	0.0001	0.0001	0.0001	66673.2	16.0248	0.00183487	0.373479	up	yes
MSTRG.25071	HHC030373	MSTRG.25071.2;rna-HHC030373.1	GO:0005524(ATP binding);GO:0005978(glycogen biosynthetic process);GO:0008878(glucose-1-phosphate adenylyltransferase activity);GO:0009507(chloroplast);GO:0009570(chloroplast stroma);GO:0019252(starch biosynthetic process);GO:0030931(heterotetrameric ADPG pyrophosphorylase complex);GO:0048046(apoplast);GO:0048573(photoperiodism, flowering)	00500(Starch and sucrose metabolism);00520(Amino sugar and nucleotide sugar metabolism)	K00975	EC:2.7.7.27	glucose-1-phosphate adenylyltransferase small subunit, chloroplastic/amyloplastic [Asparagus officinalis]	NA	113.468	128.171	72.4958	17.0292	19.0713	18.5471	4.40164	2.13804	0.00186131	0.374329	up	yes
MSTRG.11428	HHC010589	rna-HHC010589.1	GO:0009570(chloroplast stroma);GO:0010333(terpene synthase activity);GO:0033383(geranyl diphosphate metabolic process);GO:0043693(monoterpene biosynthetic process)	00902(Monoterpenoid biosynthesis)	K07385	EC:4.2.3.108	terpene synthase 10-like [Ananas comosus]	NA	4.99654	30.2396	1.00837	0.118029	0.27682	0.0001	65.6554	6.03684	0.00187334	0.374329	up	yes
MSTRG.19691		MSTRG.19691.1;MSTRG.19691.2	NA	NA	NA	NA		NA	32.6998	8.51566	4.64517	2.77102	1.07898	0.924122	12.1391	3.60158	0.00187598	0.374329	up	yes
MSTRG.8593	HHC047217	rna-HHC047217.2;MSTRG.8593.1;rna-HHC047217.1	GO:0003677(DNA binding);GO:0003700(DNA binding transcription factor activity);GO:0005634(nucleus);GO:0006351(transcription, DNA-templated);GO:0006355(regulation of transcription, DNA-templated);GO:0007275(multicellular organism development);GO:0009611(response to wounding);GO:0009788(negative regulation of abscisic acid-activated signaling pathway);GO:0009788(negative regulation of abscisic acid-…	NA	NA	NA	uncharacterized protein A4U43_C09F6650 [Asparagus officinalis];NAC domain-containing protein 48-like [Phoenix dactylifera]	NA	50.9813	10.4698	37.6293	6.09788	4.98168	5.06913	5.23232	2.38745	0.0018862	0.374329	up	yes
MSTRG.6214	HHC043547	rna-HHC043547.1	GO:0000786(nucleosome);GO:0003677(DNA binding);GO:0005634(nucleus);GO:0005794(Golgi apparatus);GO:0005829(cytosol);GO:0006334(nucleosome assembly);GO:0051276(chromosome organization)	NA	NA	NA	hypothetical protein EUGRSUZ_J02062, partial [Eucalyptus grandis]	NA	22.8684	15.0859	11.3001	0.450028	0.262391	1.20554	16.9301	4.08151	0.00201787	0.396913	up	yes
MSTRG.33852	HHC049433	rna-HHC049433.1	GO:0005737(cytoplasm);GO:0005829(cytosol)	NA	NA	NA	protein CLMP1 [Phoenix dactylifera]	NA	30.5589	0.0001	22.8303	0.0001	0.0001	0.0001	133473	17.0262	0.002025	0.396913	up	yes
MSTRG.35078	HHC048999	MSTRG.35078.3;rna-HHC048999.1;MSTRG.35078.2	GO:0003777(microtubule motor activity);GO:0005871(kinesin complex);GO:0007018(microtubule-based movement);GO:0016887(ATPase activity)	NA	NA	NA	PREDICTED: kinesin-like protein KIN-14B [Elaeis guineensis]	NA	10.56	12.5594	14.458	2.12423	1.53096	2.6051	4.79944	2.26287	0.00205202	0.399691	up	yes
MSTRG.1049	HHC001300	rna-HHC001300.1	GO:0005737(cytoplasm);GO:0005886(plasma membrane);GO:0006950(response to stress);GO:0009269(response to desiccation);GO:0016787(hydrolase activity)	NA	NA	NA	PREDICTED: uncharacterized protein LOC105056255 [Elaeis guineensis]	NA	31.1102	12.0114	7.21888	3.94765	2.36008	3.14313	4.93241	2.30229	0.00206435	0.399691	up	yes
MSTRG.30462	HHC038858	MSTRG.30462.1;rna-HHC038858.1	GO:0006855(drug transmembrane transport)	NA	NA	NA	uncharacterized protein A4U43_C01F16950 [Asparagus officinalis]	NA	68.4582	18.3367	5.79746	4.1211	2.4801	3.57425	7.9871	2.99767	0.00209324	0.402829	up	yes
MSTRG.30701	HHC039180	MSTRG.30701.1	NA	NA	NA	NA		NA	4.94413	1.62282	0.0345786	0.0001	0.0001	0.0001	16504.1	14.0105	0.00211162	0.403082	up	yes
MSTRG.35281	HHC050146	MSTRG.35281.1;rna-HHC050146.1	GO:0000139(Golgi membrane);GO:0000271(polysaccharide biosynthetic process);GO:0000977(RNA polymerase II regulatory region sequence-specific DNA binding);GO:0005794(Golgi apparatus);GO:0005886(plasma membrane);GO:0009833(plant-type primary cell wall biogenesis);GO:0016021(integral component of membrane);GO:0016740(transferase activity);GO:0016757(transferase activity, transferring glycosyl groups)…	NA	NA	NA	cellulose synthase-like protein H1 [Asparagus officinalis]	NA	1.67625	2.90413	0.505774	0.139936	0.0762561	0.125535	12.9493	3.6948	0.00211995	0.403082	up	yes
MSTRG.1001	HHC001230	rna-HHC001230.1	GO:0005802(trans-Golgi network);GO:0005886(plasma membrane)	04016(MAPK signaling pathway - plant);04075(Plant hormone signal transduction)	K14514	NA	phosphate transporter PHO1-3 [Asparagus officinalis]	NA	58.4779	38.411	0.456407	1.02657	1.13103	0.736713	26.3344	4.71888	0.00215771	0.40596	up	yes
MSTRG.19655	HHC022280	rna-HHC022280.1;MSTRG.19655.2	GO:0005634(nucleus);GO:0005737(cytoplasm)	NA	NA	NA	PREDICTED: U-box domain-containing protein 4-like [Oryza brachyantha]	NA	22.372	1.68148	0.636302	0.190879	0.0001	0.193271	64.3339	6.00751	0.00216065	0.40596	up	yes
MSTRG.6223	HHC043559	rna-HHC043559.1	GO:0000786(nucleosome);GO:0003677(DNA binding);GO:0005634(nucleus);GO:0005794(Golgi apparatus);GO:0005829(cytosol);GO:0006334(nucleosome assembly);GO:0051276(chromosome organization)	NA	NA	NA	PREDICTED: uncharacterized protein LOC102605056 [Solanum tuberosum]	NA	24.7044	33.3518	17.4713	6.20124	4.76252	4.73769	4.30142	2.10481	0.00217894	0.406153	up	yes
MSTRG.2697	HHC003720	rna-HHC003720.1	GO:0005739(mitochondrion);GO:0008453(alanine-glyoxylate transaminase activity);GO:0030170(pyridoxal phosphate binding);GO:0042802(identical protein binding)	00250(Alanine, aspartate and glutamate metabolism);00260(Glycine, serine and threonine metabolism);00270(Cysteine and methionine metabolism);00280(Valine, leucine and isoleucine degradation)	K00827	EC:2.6.1.44;EC:2.6.1.40	alanine--glyoxylate aminotransferase 2 homolog 3, mitochondrial-like [Asparagus officinalis]	NA	0.274572	1.28901	1.8126	0.0001	0.0001	0.0001	8440.72	13.0432	0.00218726	0.406153	up	yes
MSTRG.26812	HHC033246	rna-HHC033246.1	GO:0000786(nucleosome);GO:0003677(DNA binding);GO:0005634(nucleus);GO:0005794(Golgi apparatus);GO:0005829(cytosol);GO:0006334(nucleosome assembly);GO:0051276(chromosome organization)	NA	NA	NA	hypothetical protein B456_013G264400, partial [Gossypium raimondii]	NA	35.8891	46.4954	28.4344	10.4516	10.0998	7.63771	3.41848	1.77335	0.00221785	0.407079	up	yes
MSTRG.1758	HHC002282	rna-HHC002282.1	NA	NA	NA	NA	uncharacterized protein A4U43_C05F22880 [Asparagus officinalis]	NA	7.38273	8.36279	3.6678	0.716214	0.241608	0.854759	9.1801	3.19851	0.00221789	0.407079	up	yes
MSTRG.10305	HHC008914	rna-HHC008914.1	NA	NA	NA	NA	trichohyalin-like protein [Cinnamomum micranthum f. kanehirae]	NA	35.7167	364.122	435.551	25.8965	24.2299	24.763	8.7899	3.13585	0.00223241	0.40734	up	yes
MSTRG.7177	HHC044826	rna-HHC044826.1;rna-HHC044826.2	GO:0005887(integral component of plasma membrane);GO:0005887(integral component of plasma membrane)	NA	NA	NA	inorganic phosphate transporter 1-4-like [Dendrobium catenatum]	NA	15.3232	3.93362	53.2387	1.65927	1.67995	1.97786	10.1365	3.34149	0.00224497	0.40734	up	yes
MSTRG.33676	HHC052133;HHC052132	rna-HHC052133.1;MSTRG.33676.2;rna-HHC052132.1	GO:0005737(cytoplasm);GO:0030001(metal ion transport);GO:0046914(transition metal ion binding);GO:0046916(cellular transition metal ion homeostasis)	NA	NA	NA	uncharacterized protein LOC109843853 isoform X1 [Asparagus officinalis];PREDICTED: uncharacterized protein LOC103980998 [Musa acuminata subsp. malaccensis]	NA	187.042	68.1815	13.2778	12.3239	8.14787	9.134	8.12485	3.02234	0.00226903	0.409366	up	yes
MSTRG.30327	HHC038641	MSTRG.30327.1;rna-HHC038641.1	GO:0009813(flavonoid biosynthetic process);GO:0043231(intracellular membrane-bounded organelle);GO:0052696(flavonoid glucuronidation);GO:0080043(quercetin 3-O-glucosyltransferase activity);GO:0080044(quercetin 7-O-glucosyltransferase activity)	00942(Anthocyanin biosynthesis)	K12938	EC:2.4.1.-	UDP-glycosyltransferase 88F3-like [Phoenix dactylifera]	NA	316.605	246.481	76.2859	31.4636	32.603	30.7942	5.29073	2.40347	0.00228359	0.409666	up	yes
MSTRG.11298	HHC010423	rna-HHC010423.1;rna-HHC010423.2	GO:0016985(mannan endo-1,4-beta-mannosidase activity);GO:0046355(mannan catabolic process);GO:0046355(mannan catabolic process)	00051(Fructose and mannose metabolism);00051(Fructose and mannose metabolism)	K19355	EC:3.2.1.78	PREDICTED: mannan endo-1,4-beta-mannosidase 7-like [Nelumbo nucifera];Mannan endo-1,4-beta-mannosidase 1 [Dendrobium catenatum]	NA	0.152623	0.110035	0.251175	0.440626	1.58193	1.79758	0.141213	-2.82406	0.00232829	0.415339	down	yes
MSTRG.18555		MSTRG.18555.1	NA	NA	NA	NA		NA	3.13652	4.50774	0.560386	0.0001	0.0001	0.0001	20511.9	14.3242	0.00234556	0.416082	up	yes
MSTRG.28095	HHC035360	rna-HHC035360.1	GO:0000175(3'-5'-exoribonuclease activity);GO:0000288(nuclear-transcribed mRNA catabolic process, deadenylation-dependent decay);GO:0030014(CCR4-NOT complex)	03018(RNA degradation)	K12581	NA	probable CCR4-associated factor 1 homolog 11 [Asparagus officinalis]	NA	3.42191	4.77024	53.8108	1.58509	0.679193	0.996675	18.9717	4.24577	0.00239456	0.421215	up	yes
MSTRG.23329		MSTRG.23329.1	NA	NA	NA	NA		NA	0.0001	4.48971	32.4398	0.0001	0.0001	0.0001	92324.2	16.4944	0.00241684	0.421215	up	yes
MSTRG.27786	HHC034920	rna-HHC034920.1;MSTRG.27786.1	GO:0009536(plastid)	NA	NA	NA	DNA-directed RNA polymerase 3B, chloroplastic-like [Ananas comosus]	NA	22.1122	13.615	7.89295	2.76487	2.44513	3.01777	4.24546	2.08592	0.00242898	0.421215	up	yes
MSTRG.34296	HHC053041	rna-HHC053041.1	GO:0009570(chloroplast stroma);GO:0044183(protein binding involved in protein folding);GO:0061077(chaperone-mediated protein folding)	NA	NA	NA	chaperonin-like RbcX protein 2, chloroplastic [Asparagus officinalis]	NA	3.68627	0.892101	0.241149	0.628436	0.0001	0.0974255	27.9309	4.80379	0.00244834	0.421215	up	yes
MSTRG.23026	HHC027569	MSTRG.23026.1;rna-HHC027569.1	GO:0005576(extracellular region);GO:0009055(electron transfer activity);GO:0009507(chloroplast);GO:0016614(oxidoreductase activity, acting on CH-OH group of donors);GO:0050660(flavin adenine dinucleotide binding);GO:0055114(oxidation-reduction process)	00052(Galactose metabolism);00500(Starch and sucrose metabolism)	K01187	EC:3.2.1.20	uncharacterized protein A4U43_C06F500 [Asparagus officinalis]	NA	36.6608	8.33592	1.19957	0.600852	0.48931	0.950846	16.2473	4.02213	0.00244902	0.421215	up	yes
MSTRG.8405	HHC046936	rna-HHC046936.1	GO:0005249(voltage-gated potassium channel activity);GO:0005887(integral component of plasma membrane);GO:0042391(regulation of membrane potential)	NA	NA	NA	potassium channel KOR2-like [Asparagus officinalis]	NA	98.7215	30.9595	10.0704	8.12889	6.36971	4.82171	6.60686	2.72396	0.00247245	0.421215	up	yes
MSTRG.15015		MSTRG.15015.3;MSTRG.15015.1;MSTRG.15015.2;MSTRG.15015.6;MSTRG.15015.7;MSTRG.15015.4;MSTRG.15015.5	NA	NA	NA	NA		NA	132.557	38.354	3.02951	2.85514	1.85783	3.57508	16.2708	4.02422	0.00247396	0.421215	up	yes
MSTRG.24824	HHC030027	MSTRG.24824.1;rna-HHC030027.1	GO:0005634(nucleus);GO:0009416(response to light stimulus);GO:0009909(regulation of flower development)	04712(Circadian rhythm - plant)	K12135	NA	zinc finger protein CONSTANS-LIKE 2 isoform X1 [Asparagus officinalis]	NA	561.751	417.913	280.626	88.6899	78.5195	93.4561	3.92201	1.97159	0.00248062	0.421215	up	yes
MSTRG.28529	HHC035954	rna-HHC035954.1	GO:0009507(chloroplast);GO:0016491(oxidoreductase activity);GO:0055114(oxidation-reduction process)	NA	NA	NA	short-chain dehydrogenase TIC 32, chloroplastic-like [Phoenix dactylifera]	NA	29.3711	38.0541	12.35	10.9954	5.90103	7.5446	3.37547	1.75509	0.00251618	0.424981	up	yes
MSTRG.9110	HHC006759	rna-HHC006759.2;MSTRG.9110.1;rna-HHC006759.1	NA	NA	NA	NA		NA	31.4495	23.5695	28.5796	5.85891	5.46737	6.02362	3.8925	1.9607	0.00254718	0.425828	up	yes
MSTRG.22538	HHC026831	rna-HHC026831.1	GO:0003700(DNA binding transcription factor activity);GO:0005634(nucleus);GO:0043565(sequence-specific DNA binding);GO:0044212(transcription regulatory region DNA binding)	NA	NA	NA	zinc finger protein AZF2 [Eutrema salsugineum]	NA	20.552	12.3695	145.113	4.36826	5.50001	2.76473	11.035	3.46402	0.00254802	0.425828	up	yes
MSTRG.15617	HHC016496	rna-HHC016496.3;rna-HHC016496.2;rna-HHC016496.1;rna-HHC016496.4	GO:0005515(protein binding);GO:0005634(nucleus);GO:0005886(plasma membrane);GO:0005905(clathrin-coated pit);GO:0006886(intracellular protein transport);GO:0006897(endocytosis);GO:0008289(lipid binding);GO:0030131(clathrin adaptor complex);GO:0016020(membrane);GO:0016020(membrane)	04144(Endocytosis);04144(Endocytosis)	K11824	NA	AP-2 complex subunit alpha-2-like [Asparagus officinalis]	NA	5.96091	2.84979	6.76359	5.33275	1.00613	2.17984	3.28111	1.71419	0.00267246	0.440033	up	yes
MSTRG.36021	HHC053662	MSTRG.36021.2;rna-HHC053662.1	GO:0003824(catalytic activity);GO:0004084(branched-chain-amino-acid transaminase activity);GO:0005829(cytosol);GO:0009082(branched-chain amino acid biosynthetic process);GO:0009097(isoleucine biosynthetic process);GO:0009098(leucine biosynthetic process);GO:0009099(valine biosynthetic process);GO:0009507(chloroplast);GO:0009570(chloroplast stroma);GO:0052654(L-leucine transaminase activity);GO:00…	00270(Cysteine and methionine metabolism);00280(Valine, leucine and isoleucine degradation);00290(Valine, leucine and isoleucine biosynthesis);00770(Pantothenate and CoA biosynthesis)	K00826	EC:2.6.1.42	branched-chain-amino-acid aminotransferase 5, chloroplastic-like isoform X2 [Asparagus officinalis]	NA	22.3662	3.95389	0.0001	0.0001	0.0001	0.0001	65800.6	16.0058	0.00268249	0.440033	up	yes
MSTRG.12541	HHC012063	rna-HHC012063.1;MSTRG.12541.2	GO:0004364(glutathione transferase activity);GO:0005737(cytoplasm);GO:0006749(glutathione metabolic process);GO:0009407(toxin catabolic process)	00480(Glutathione metabolism)	K00799	EC:2.5.1.18	probable glutathione S-transferase parA [Asparagus officinalis]	NA	5.89448	1.16417	0.812996	0.453862	0.177776	0.156505	12.4529	3.63841	0.00269027	0.440033	up	yes
MSTRG.13263	HHC013385	rna-HHC013385.1	GO:0005739(mitochondrion)	NA	NA	NA	PREDICTED: uncharacterized protein LOC103988565 [Musa acuminata subsp. malaccensis]	NA	4.84514	3.55872	2.62405	0.0001	0.104208	0.0798315	29.961	4.90502	0.00271126	0.440033	up	yes
MSTRG.19440	HHC021949	MSTRG.19440.7;MSTRG.19440.5;MSTRG.19440.2;rna-HHC021949.1;MSTRG.19440.3;MSTRG.19440.8;MSTRG.19440.9;MSTRG.19440.10;MSTRG.19440.6;MSTRG.19440.4	GO:0004353(glutamate dehydrogenase [NAD(P)+] activity);GO:0005507(copper ion binding);GO:0005524(ATP binding);GO:0005739(mitochondrion);GO:0006520(cellular amino acid metabolic process);GO:0006807(nitrogen compound metabolic process);GO:0008270(zinc ion binding);GO:0009646(response to absence of light);GO:0009651(response to salt stress);GO:0016491(oxidoreductase activity);GO:0046686(response to …	00910(Nitrogen metabolism);00250(Alanine, aspartate and glutamate metabolism);00220(Arginine biosynthesis);00471(D-Glutamine and D-glutamate metabolism)	K00261	EC:1.4.1.3	glutamate dehydrogenase 1, mitochondrial [Asparagus officinalis]	NA	182.674	495.758	24.5639	80.2749	30.4986	28.6154	6.62509	2.72794	0.00271354	0.440033	up	yes
MSTRG.32244	HHC050059	MSTRG.32244.1	NA	NA	NA	NA		NA	7.55288	12.6781	0.161055	0.0001	0.0001	0.0396204	256.696	8.00392	0.00275757	0.440033	up	yes
MSTRG.26122	HHC032212	rna-HHC032212.1	GO:0005737(cytoplasm);GO:0030001(metal ion transport);GO:0046914(transition metal ion binding);GO:0046916(cellular transition metal ion homeostasis)	00562(Inositol phosphate metabolism);04070(Phosphatidylinositol signaling system)	K18081	EC:3.1.3.64;EC:3.1.3.95	PREDICTED: heavy metal-associated isoprenylated plant protein 28 [Elaeis guineensis]	NA	5.81276	2.8742	0.0001	0.0001	0.0001	0.0001	21717.9	14.4066	0.00276492	0.440033	up	yes
MSTRG.191	HHC000219;HHC000220	MSTRG.191.2;rna-HHC000219.1;MSTRG.191.5;MSTRG.191.1;rna-HHC000220.1	GO:0009718(anthocyanin-containing compound biosynthetic process);GO:0010023(proanthocyanidin biosynthetic process);GO:0051213(dioxygenase activity);GO:0051213(dioxygenase activity)	00941(Flavonoid biosynthesis);00941(Flavonoid biosynthesis)	K05277	EC:1.14.20.4	anthocyanidin synthase [Iris x hollandica]	NA	1.52489	25.1795	2.70465	1.42909	0.529728	0.852745	11.1532	3.47939	0.00276854	0.440033	up	yes
MSTRG.32225		MSTRG.32225.1	NA	NA	NA	NA		NA	0.0001	0.0001	0.80209	0.0001	6.51161	6.57969	0.0306459	-5.02816	0.00277486	0.440033	down	yes
MSTRG.19861	HHC022557;HHC022556	MSTRG.19861.2;rna-HHC022556.1;MSTRG.19861.4;MSTRG.19861.1;rna-HHC022557.1;MSTRG.19861.5	NA	NA	NA	NA	PREDICTED: protein PHLOEM PROTEIN 2-LIKE A1-like [Daucus carota subsp. sativus]	NA	46.0245	11.8773	2.07657	2.4236	1.31798	1.15664	12.6084	3.65631	0.00278119	0.440033	up	yes
MSTRG.14120	HHC014540	rna-HHC014540.2;rna-HHC014540.1	GO:0005515(protein binding);GO:0005737(cytoplasm);GO:0005773(vacuole);GO:0008270(zinc ion binding);GO:0015031(protein transport);GO:0016236(macroautophagy);GO:0043130(ubiquitin binding);GO:0051258(protein polymerization);GO:0051258(protein polymerization)	NA	NA	NA	uncharacterized protein A4U43_C09F16680 [Asparagus officinalis]	NA	2.71255	1.13566	0.721277	0.38846	0.1962	0.195423	6.32999	2.6622	0.00278546	0.440033	up	yes
MSTRG.12551		MSTRG.12551.1	NA	NA	NA	NA		NA	1.05936	6.08162	0.616645	0.275133	0.24518	0.188147	9.26869	3.21237	0.00291952	0.45819	up	yes
MSTRG.2058	HHC002704	rna-HHC002704.1	GO:0000719(photoreactive repair);GO:0005634(nucleus);GO:0005737(cytoplasm);GO:0005829(cytosol);GO:0005975(carbohydrate metabolic process);GO:0006281(DNA repair);GO:0009409(response to cold);GO:0009411(response to UV);GO:0016853(isomerase activity)	NA	NA	NA	hypothetical protein OsJ_02139 [Oryza sativa Japonica Group]	NA	7.4026	2.71549	6.50691	0.958739	0.559451	0.734831	6.79285	2.76402	0.00292925	0.45819	up	yes
MSTRG.4981	HHC041802	rna-HHC041802.1;rna-HHC041802.3;rna-HHC041802.2	GO:0005634(nucleus);GO:0016787(hydrolase activity);GO:0008097(5S rRNA binding);GO:0008097(5S rRNA binding)	00760(Nicotinate and nicotinamide metabolism);00760(Nicotinate and nicotinamide metabolism)	K18551	EC:3.1.3.-	uncharacterized protein C24B11.05-like [Asparagus officinalis];uncharacterized protein C24B11.05 [Asparagus officinalis]	NA	1027.33	1217.54	27.046	35.7743	36.743	40.5181	14.9343	3.90056	0.00295243	0.459552	up	yes
MSTRG.32792		MSTRG.32792.1	NA	NA	NA	NA		NA	0.0664625	2.18864	1.19153	0.0001	0.0001	0.0001	8616.83	13.0729	0.00298966	0.463076	up	yes
MSTRG.14485	HHC015045	rna-HHC015045.1;rna-HHC015045.2;rna-HHC015045.3	GO:0005634(nucleus);GO:0005634(nucleus)	NA	NA	NA	PREDICTED: E3 ubiquitin-protein ligase SHPRH isoform X1 [Elaeis guineensis];uncharacterized protein LOC109846770, partial [Asparagus officinalis]	NA	5.14451	5.8454	3.82981	5.36597	1.90575	1.98369	2.59493	1.3757	0.00303238	0.467414	up	yes
MSTRG.29960	HHC038045	rna-HHC038045.1;MSTRG.29960.1	GO:0004028(3-chloroallyl aldehyde dehydrogenase activity);GO:0004029(aldehyde dehydrogenase (NAD) activity)	00010(Glycolysis / Gluconeogenesis);00053(Ascorbate and aldarate metabolism);00620(Pyruvate metabolism);00071(Fatty acid degradation);00561(Glycerolipid metabolism);00280(Valine, leucine and isoleucine degradation);00310(Lysine degradation);00330(Arginine and proline metabolism);00340(Histidine metabolism);00380(Tryptophan metabolism);00410(beta-Alanine metabolism);00903(Limonene and pinene degra…	K00128	EC:1.2.1.3	aldehyde dehydrogenase family 3 member F1-like [Asparagus officinalis]	NA	11.5084	25.0615	15.9162	16.8047	48.3212	50.8613	0.34931	-1.51742	0.00307152	0.471159	down	yes
MSTRG.23509	HHC028251	rna-HHC028251.1	GO:0042802(identical protein binding);GO:0050275(scopoletin glucosyltransferase activity)	NA	NA	NA	scopoletin glucosyltransferase-like [Asparagus officinalis]	NA	37.9292	5.10033	3.84316	1.33149	1.06536	1.48005	9.46888	3.24319	0.00310871	0.47294	up	yes
MSTRG.9767	HHC007947	rna-HHC007947.1	GO:0005634(nucleus);GO:0005737(cytoplasm);GO:0005769(early endosome);GO:0005802(trans-Golgi network);GO:0005886(plasma membrane);GO:0008283(cell proliferation);GO:0009507(chloroplast);GO:0009553(embryo sac development);GO:0009554(megasporogenesis);GO:0009556(microsporogenesis);GO:0009705(plant-type vacuole membrane);GO:0009734(auxin-activated signaling pathway);GO:0009793(embryo development endin…	03013(RNA transport);04120(Ubiquitin mediated proteolysis)	K10577	NA	MOB kinase activator-like 1A [Asparagus officinalis]	NA	21.31	17.0912	5.36832	5.91838	2.04988	1.93691	6.23157	2.6396	0.0031266	0.47294	up	yes
MSTRG.8437	HHC046989	MSTRG.8437.1;rna-HHC046989.2;rna-HHC046989.1	GO:0005634(nucleus);GO:0008150(biological_process);GO:0016874(ligase activity);GO:0016874(ligase activity)	00270(Cysteine and methionine metabolism);00350(Tyrosine metabolism);00360(Phenylalanine metabolism);00400(Phenylalanine, tyrosine and tryptophan biosynthesis);00130(Ubiquinone and other terpenoid-quinone biosynthesis);00950(Isoquinoline alkaloid biosynthesis);00960(Tropane, piperidine and pyridine alkaloid biosynthesis);00960(Tropane, piperidine and pyridine alkaloid biosynthesis)	K00815	EC:2.6.1.5	uncharacterized protein LOC110102404 isoform X1 [Dendrobium catenatum]	NA	29.4044	7.40646	17.0067	3.35214	2.23206	2.49231	6.05051	2.59706	0.00312781	0.47294	up	yes
MSTRG.4287	HHC040586	rna-HHC040586.1	GO:0005198(structural molecule activity);GO:0005634(nucleus);GO:0005886(plasma membrane);GO:0009507(chloroplast);GO:0009534(chloroplast thylakoid);GO:0009535(chloroplast thylakoid membrane);GO:0009579(thylakoid);GO:0009658(chloroplast organization);GO:0009941(chloroplast envelope);GO:0010193(response to ozone);GO:0010287(plastoglobule);GO:0016020(membrane);GO:0031977(thylakoid lumen);GO:0042742(d…	NA	NA	NA	probable plastid-lipid-associated protein 6, chloroplastic [Asparagus officinalis]	NA	9.42975	6.86506	5.59233	1.47228	1.46287	0.846279	5.05801	2.33857	0.00316995	0.475716	up	yes
MSTRG.28016	HHC035252	rna-HHC035252.1;MSTRG.28016.2	GO:0003333(amino acid transmembrane transport);GO:0005886(plasma membrane);GO:0015171(amino acid transmembrane transporter activity)	NA	NA	NA	lysine histidine transporter 1-like isoform X1 [Ananas comosus]	NA	43.3755	2.81806	0.0001	0.0001	0.0001	0.0001	115484	16.8173	0.00317613	0.475716	up	yes
MSTRG.35640	HHC049103	rna-HHC049103.1	GO:0003674(molecular_function);GO:0005777(peroxisome);GO:0005829(cytosol);GO:0008150(biological_process);GO:0009507(chloroplast);GO:0009570(chloroplast stroma)	04146(Peroxisome)	K13346	NA	stress-response A/B barrel domain-containing protein UP3 [Phoenix dactylifera]	NA	18.9876	20.8537	27.4728	9.61212	6.77605	6.10784	2.98536	1.57791	0.00319386	0.475771	up	yes
MSTRG.2176	HHC002884	rna-HHC002884.2;rna-HHC002884.4;rna-HHC002884.1;rna-HHC002884.6;rna-HHC002884.3;rna-HHC002884.5	GO:0004103(choline kinase activity);GO:0005524(ATP binding);GO:0005737(cytoplasm);GO:0016310(phosphorylation);GO:0016310(phosphorylation)	00564(Glycerophospholipid metabolism);00564(Glycerophospholipid metabolism)	K14156	EC:2.7.1.32;EC:2.7.1.82	probable choline kinase 2 isoform X1 [Dendrobium catenatum];probable choline kinase 2 [Phoenix dactylifera]	NA	35.4817	24.3449	2.30285	1.85693	1.94576	1.3019	9.85119	3.3003	0.00320647	0.475771	up	yes
MSTRG.3625		MSTRG.3625.1	NA	NA	NA	NA		NA	27.1491	15.9936	3.90305	1.37	0.985911	1.66101	9.14566	3.19309	0.00322894	0.476299	up	yes
MSTRG.16241	HHC017308	rna-HHC017308.1;rna-HHC017308.2	GO:0003677(DNA binding);GO:0003700(DNA binding transcription factor activity);GO:0005622(intracellular);GO:0005634(nucleus);GO:0006351(transcription, DNA-templated);GO:0006355(regulation of transcription, DNA-templated);GO:0009873(ethylene-activated signaling pathway);GO:0009873(ethylene-activated signaling pathway)	NA	NA	NA	PREDICTED: ethylene-responsive transcription factor ERF003-like [Elaeis guineensis]	NA	0.866256	0.482576	2.58626	0.100787	0.0281928	0.114682	14.1238	3.82006	0.00325292	0.476299	up	yes
MSTRG.15016		MSTRG.15016.1	NA	NA	NA	NA		NA	69.5556	47.3668	0.372495	1.60281	1.84082	0.524956	25.1286	4.65126	0.00327413	0.476299	up	yes
MSTRG.18719	HHC020983;HHC020986;HHC020984;HHC020985	rna-HHC020983.1;rna-HHC020986.1;rna-HHC020983.2;MSTRG.18719.4;MSTRG.18719.1;rna-HHC020984.1;MSTRG.18719.3;MSTRG.18719.6;MSTRG.18719.11;MSTRG.18719.8;MSTRG.18719.9;MSTRG.18719.5;rna-HHC020985.1;MSTRG.18719.7	GO:0004364(glutathione transferase activity);GO:0005737(cytoplasm);GO:0006749(glutathione metabolic process);GO:0009407(toxin catabolic process);GO:0009407(toxin catabolic process)	00480(Glutathione metabolism);00480(Glutathione metabolism)	K00799	EC:2.5.1.18	glutathione S-transferase U17-like [Phoenix dactylifera];PREDICTED: probable glutathione S-transferase [Nicotiana attenuata];PREDICTED: glutathione S-transferase U17-like [Nicotiana attenuata]	NA	13.2984	1.8917	0.828231	0.152545	0.340813	0.159084	16.1742	4.01563	0.00328699	0.476299	up	yes
MSTRG.26447	HHC032726	rna-HHC032726.1	GO:0003674(molecular_function);GO:0005783(endoplasmic reticulum);GO:0008150(biological_process)	NA	NA	NA	uncharacterized protein LOC109849741 [Asparagus officinalis]	NA	13.1922	2.0868	1.84425	0.488884	0.268935	0.589897	10.2535	3.35805	0.00328734	0.476299	up	yes
MSTRG.19387	HHC021897	rna-HHC021897.1	GO:0005575(cellular_component)	NA	NA	NA	uncharacterized protein A4U43_C03F31490 [Asparagus officinalis]	NA	191.41	103.888	7.01571	6.6693	7.74043	6.75593	10.6573	3.41377	0.0033139	0.476299	up	yes
MSTRG.296	HHC000332	rna-HHC000332.1	GO:0003674(molecular_function);GO:0005575(cellular_component);GO:0008150(biological_process)	NA	NA	NA	uncharacterized protein LOC109826385 [Asparagus officinalis]	NA	7.96033	179.042	393.547	8.27014	11.3404	8.8445	14.5856	3.86647	0.00331804	0.476299	up	yes
MSTRG.7096	HHC044667	MSTRG.7096.1	NA	NA	NA	NA		NA	10.5437	2.32156	0.478001	0.352513	0.16417	0.301036	14.7201	3.87972	0.00333003	0.476299	up	yes
MSTRG.29710		MSTRG.29710.1;MSTRG.29710.2	NA	NA	NA	NA		NA	21.6601	39.9666	22.9982	70.4135	97.3379	144.775	0.320179	-1.64305	0.00335886	0.478268	down	yes
MSTRG.15612	HHC016494	MSTRG.15612.1	NA	NA	NA	NA		NA	266.369	141.742	20.3389	3.0377	10.9156	6.90471	12.1066	3.59772	0.00343324	0.485488	up	yes
MSTRG.35863	HHC052388	rna-HHC052388.1	NA	NA	NA	NA		NA	24.2385	14.5524	8.04382	1.83262	2.46028	2.66408	4.74862	2.24751	0.00344014	0.485488	up	yes
MSTRG.32924	HHC054016	rna-HHC054016.1;MSTRG.32924.1	GO:0004553(hydrolase activity, hydrolyzing O-glycosyl compounds);GO:0030247(polysaccharide binding);GO:0046658(anchored component of plasma membrane)	00500(Starch and sucrose metabolism)	K19891	EC:3.2.1.39	beta 1,3-glucanase [Lilium regale]	NA	94.885	22.8181	3.46458	1.90856	2.82757	0.669659	17.5962	4.13719	0.00347194	0.487807	up	yes
MSTRG.3674	HHC005485	rna-HHC005485.2;rna-HHC005485.1	GO:0000154(rRNA modification);GO:0030515(snoRNA binding);GO:0031428(box C/D snoRNP complex);GO:0032040(small-subunit processome);GO:0032040(small-subunit processome)	03008(Ribosome biogenesis in eukaryotes);03008(Ribosome biogenesis in eukaryotes)	K14565	NA	PREDICTED: probable nucleolar protein 5-2 [Musa acuminata subsp. malaccensis]	NA	14.2592	7.55082	13.2429	2.95414	2.68109	2.24922	3.85444	1.94652	0.00350273	0.489966	up	yes
MSTRG.6145		MSTRG.6145.1	NA	NA	NA	NA		NA	1.47856	0.854013	0.315622	0.0001	3.68984	10.976	0.0902882	-3.46932	0.00354464	0.493653	down	yes
MSTRG.30640	HHC039104	rna-HHC039104.1	GO:0016020(membrane);GO:0016709(oxidoreductase activity, acting on paired donors, with incorporation or reduction of molecular oxygen, NAD(P)H as one donor, and incorporation of one atom of oxygen);GO:0044550(secondary metabolite biosynthetic process)	NA	NA	NA	Cytochrome P450, E-class, group I [Trema orientale]	NA	21.5856	10.3603	1.53457	2.34986	1.5031	1.4343	6.09899	2.60857	0.0035683	0.493779	up	yes
MSTRG.24869		MSTRG.24869.1	NA	NA	NA	NA		NA	20.4319	7.05648	1.3801	1.97181	0.891436	0.873113	8.73886	3.12745	0.00357761	0.493779	up	yes
MSTRG.15314	HHC016089	rna-HHC016089.1	GO:0000786(nucleosome);GO:0003677(DNA binding);GO:0005634(nucleus);GO:0006334(nucleosome assembly);GO:0031492(nucleosomal DNA binding)	NA	NA	NA	hypothetical protein Csa_1G612925 [Cucumis sativus]	NA	1.33401	1.73505	1.11015	0.378968	0.294419	0.232399	4.32614	2.11308	0.00360344	0.493779	up	yes
MSTRG.22359	HHC026509	rna-HHC026509.1	NA	NA	NA	NA		NA	1.17298	0.303205	0.453544	0.261362	0.0372226	0.068083	10.4035	3.37899	0.00360775	0.493779	up	yes
MSTRG.8394		MSTRG.8394.1	NA	NA	NA	NA		NA	0.0001	10.1893	1.52577	0.0001	0.0001	0.0001	29288.1	14.838	0.00366289	0.497486	up	yes
MSTRG.36142	HHC047601	rna-HHC047601.1	GO:0005737(cytoplasm);GO:0005794(Golgi apparatus);GO:0009055(electron transfer activity);GO:0016491(oxidoreductase activity);GO:0055114(oxidation-reduction process)	NA	NA	NA	apoptosis-inducing factor homolog B-like [Asparagus officinalis]	NA	0.294397	0.29804	0.268317	1.29323	4.14146	3.27852	0.145148	-2.78441	0.00366617	0.497486	down	yes
MSTRG.29915	HHC037982	rna-HHC037982.1	GO:0000103(sulfate assimilation);GO:0004604(phosphoadenylyl-sulfate reductase (thioredoxin) activity);GO:0009507(chloroplast);GO:0009534(chloroplast thylakoid);GO:0009570(chloroplast stroma);GO:0009973(adenylyl-sulfate reductase activity);GO:0016671(oxidoreductase activity, acting on a sulfur group of donors, disulfide as acceptor);GO:0019344(cysteine biosynthetic process);GO:0019379(sulfate assi…	00920(Sulfur metabolism)	K05907	EC:1.8.4.9	5'-adenylylsulfate reductase [Polygonatum pubescens]	NA	12.3653	66.8215	73.714	7.20803	6.51252	6.75016	6.03607	2.59361	0.00372182	0.502163	up	yes
MSTRG.16556	HHC017746;HHC017744;HHC017743;HHC017745	MSTRG.16556.2;MSTRG.16556.6;rna-HHC017743.1;rna-HHC017745.2;MSTRG.16556.10;MSTRG.16556.1;rna-HHC017744.1;MSTRG.16556.7;rna-HHC017745.1;rna-HHC017746.1;MSTRG.16556.3;MSTRG.16556.12;MSTRG.16556.8;MSTRG.16556.5;MSTRG.16556.9;MSTRG.16556.4;MSTRG.16556.15	GO:0051213(dioxygenase activity);GO:0051213(dioxygenase activity)	00940(Phenylpropanoid biosynthesis);00940(Phenylpropanoid biosynthesis)	K06892	EC:1.14.11.-	protein DMR6-LIKE OXYGENASE 2-like [Asparagus officinalis]	NA	5.50224	32.9186	29.26	3.11729	3.02266	3.43049	5.48555	2.45564	0.00373616	0.502163	up	yes
MSTRG.23083	HHC027650	rna-HHC027650.1	GO:0005634(nucleus);GO:0008150(biological_process);GO:0048046(apoplast)	NA	NA	NA	uncharacterized protein LOC109822931 [Asparagus officinalis]	NA	23.1407	9.37353	6.76612	4.26651	2.71632	2.21712	4.41344	2.1419	0.00374808	0.502163	up	yes
MSTRG.20588	HHC023522;HHC023524	MSTRG.20588.2;rna-HHC023522.1;rna-HHC023524.1	GO:0000786(nucleosome);GO:0003677(DNA binding);GO:0005634(nucleus);GO:0006334(nucleosome assembly);GO:0031492(nucleosomal DNA binding);GO:0031492(nucleosomal DNA binding)	NA	NA	NA	hypothetical protein GOBAR_AA31967 [Gossypium barbadense];PREDICTED: histone H3-like centromeric protein CSE4 [Gossypium hirsutum]	NA	12.4325	11.7174	6.55485	2.44749	2.02481	2.28331	3.84765	1.94398	0.00384021	0.505541	up	yes
MSTRG.34038	HHC052801	MSTRG.34038.1;rna-HHC052801.1	GO:0005886(plasma membrane);GO:0006810(transport);GO:0022857(transmembrane transporter activity)	NA	NA	NA	WAT1-related protein At1g44800-like isoform X1 [Asparagus officinalis]	NA	377.915	313.763	11.0037	13.5806	19.2133	10.8856	11.8985	3.5727	0.00384141	0.505541	up	yes
MSTRG.21993	HHC025767	MSTRG.21993.1	NA	NA	NA	NA		NA	16.8553	29.8526	2.99166	1.75537	2.00721	1.99709	6.42496	2.68369	0.0038542	0.505541	up	yes
MSTRG.13442	HHC013619	rna-HHC013619.1	NA	NA	NA	NA		NA	401.51	154.464	51.7579	19.783	22.3646	26.4526	6.42718	2.68419	0.00385957	0.505541	up	yes
MSTRG.14114	HHC014530	rna-HHC014530.1	NA	NA	NA	NA		NA	21.5909	20.12	2.62676	2.51344	2.03517	2.2613	5.45228	2.44686	0.00386079	0.505541	up	yes
MSTRG.11509	HHC010683	MSTRG.11509.2;rna-HHC010683.1	GO:0005802(trans-Golgi network);GO:0005886(plasma membrane)	NA	NA	NA	phosphate transporter PHO1-3 [Asparagus officinalis]	NA	82.3385	70.0862	1.42343	2.63276	2.04678	3.38165	14.4131	3.84931	0.00387313	0.505541	up	yes
MSTRG.1621	HHC002079	rna-HHC002079.1	GO:0003674(molecular_function);GO:0005634(nucleus);GO:0009733(response to auxin)	04075(Plant hormone signal transduction)	K14488	NA	PREDICTED: auxin-induced protein 15A [Elaeis guineensis]	NA	1.67522	1.06321	0.0695776	0.0538007	0.0001	0.042203	33.8251	5.08002	0.00388474	0.505541	up	yes
MSTRG.33657	HHC051653	rna-HHC051653.1;MSTRG.33657.1	GO:0003677(DNA binding);GO:0005634(nucleus);GO:0006351(transcription, DNA-templated);GO:0006355(regulation of transcription, DNA-templated);GO:0016569(covalent chromatin modification);GO:0035064(methylated histone binding);GO:0043565(sequence-specific DNA binding);GO:0044212(transcription regulatory region DNA binding);GO:0046872(metal ion binding)	NA	NA	NA	LOW QUALITY PROTEIN: PHD finger protein ALFIN-LIKE 2-like [Asparagus officinalis]	NA	12.4759	17.2107	14.4822	14.442	2.5643	7.22953	2.99223	1.58122	0.00391041	0.506805	up	yes
MSTRG.28172	HHC035470	rna-HHC035470.1	GO:0005507(copper ion binding);GO:0005576(extracellular region);GO:0005768(endosome);GO:0005773(vacuole);GO:0005794(Golgi apparatus);GO:0005802(trans-Golgi network);GO:0008131(primary amine oxidase activity);GO:0016021(integral component of membrane);GO:0048038(quinone binding);GO:0055114(oxidation-reduction process)	00260(Glycine, serine and threonine metabolism);00350(Tyrosine metabolism);00360(Phenylalanine metabolism);00410(beta-Alanine metabolism);00950(Isoquinoline alkaloid biosynthesis);00960(Tropane, piperidine and pyridine alkaloid biosynthesis)	K00276	EC:1.4.3.21	primary amine oxidase-like [Ananas comosus]	NA	58.0545	28.481	15.9121	6.45029	7.01018	5.7235	4.27598	2.09625	0.00393136	0.507449	up	yes
MSTRG.33414	HHC049940	rna-HHC049940.1	GO:0005739(mitochondrion);GO:0006457(protein folding);GO:0030150(protein import into mitochondrial matrix);GO:0050821(protein stabilization);GO:0051087(chaperone binding)	NA	NA	NA	uncharacterized protein LOC103718920 [Phoenix dactylifera]	NA	130.745	78.8636	46.5172	21.0802	15.8119	18.9212	3.99052	1.99658	0.00398358	0.512107	up	yes
gene-HHC011889	HHC011889	rna-HHC011889.3;rna-HHC011889.1;rna-HHC011889.2	GO:0004497(monooxygenase activity);GO:0044550(secondary metabolite biosynthetic process);GO:0044550(secondary metabolite biosynthetic process)	00906(Carotenoid biosynthesis);00906(Carotenoid biosynthesis)	K09838	EC:1.14.15.21	uncharacterized protein A4U43_C06F5410 [Asparagus officinalis]	NA	3.87342	2.08861	0.0001	0.531733	0.0001	0.0553152	58.5928	5.87265	0.00402424	0.512333	up	yes
MSTRG.20024		MSTRG.20024.1	NA	NA	NA	NA		NA	31.971	20.0203	2.25032	1.60491	1.28808	2.33442	7.7083	2.94641	0.00403812	0.512333	up	yes
MSTRG.16273	HHC017345	MSTRG.16273.2;MSTRG.16273.1;rna-HHC017345.1	GO:0000149(SNARE binding);GO:0005484(SNAP receptor activity);GO:0006886(intracellular protein transport);GO:0006906(vesicle fusion);GO:0012505(endomembrane system);GO:0016021(integral component of membrane);GO:0031201(SNARE complex);GO:0048278(vesicle docking)	04130(SNARE interactions in vesicular transport)	K08498	NA	PREDICTED: syntaxin-61 [Elaeis guineensis]	NA	15.9547	9.9293	10.8649	10.0647	5.22291	3.43589	2.70324	1.43469	0.00405047	0.512333	up	yes
MSTRG.24937	HHC030177	rna-HHC030177.1	GO:0030599(pectinesterase activity);GO:0046910(pectinesterase inhibitor activity);GO:0071944(cell periphery)	00040(Pentose and glucuronate interconversions)	K01051	EC:3.1.1.11	pectinesterase-like [Phoenix dactylifera]	NA	274.179	109.911	44.9065	29.486	22.2225	26.516	4.7035	2.23373	0.00405516	0.512333	up	yes
MSTRG.2332		MSTRG.2332.1	NA	NA	NA	NA		NA	137.283	115.446	46.7653	14.3815	20.7973	14.6701	4.42486	2.14563	0.00409826	0.512333	up	yes
MSTRG.22787	HHC027235	rna-HHC027235.1	GO:0003959(NADPH dehydrogenase activity);GO:0005622(intracellular);GO:0006952(defense response);GO:0009695(jasmonic acid biosynthetic process);GO:0016629(12-oxophytodienoate reductase activity);GO:0031408(oxylipin biosynthetic process)	00592(alpha-Linolenic acid metabolism)	K05894	EC:1.3.1.42	putative 12-oxophytodienoate reductase 4 [Dendrobium catenatum]	NA	0.146104	265.206	14.5693	0.631167	0.808609	0.9577	79.4177	6.31139	0.00411177	0.512333	up	yes
MSTRG.15589	HHC016461	rna-HHC016461.1;MSTRG.15589.1	GO:0006820(anion transport);GO:0016021(integral component of membrane);GO:0022857(transmembrane transporter activity);GO:0055085(transmembrane transport)	NA	NA	NA	PREDICTED: putative glycerol-3-phosphate transporter 1 [Musa acuminata subsp. malaccensis]	NA	4.51563	14.802	13.3491	2.02856	2.06176	1.69594	4.61657	2.20682	0.00411282	0.512333	up	yes
MSTRG.28676	HHC036141	rna-HHC036141.1	GO:0008150(biological_process);GO:0016021(integral component of membrane);GO:0016740(transferase activity)	NA	NA	NA	LOW QUALITY PROTEIN: glycosyltransferase family 92 protein RCOM_0530710-like [Phoenix dactylifera]	NA	269.492	171.477	13.0307	18.6386	16.9915	14.3856	7.53157	2.91295	0.00412545	0.512333	up	yes
MSTRG.22867		MSTRG.22867.1	NA	NA	NA	NA		NA	1.62077	0.439267	0.552439	0.240186	0.0901581	0.0644667	9.22446	3.20546	0.00413959	0.512333	up	yes
MSTRG.35356	HHC050458	rna-HHC050458.1;MSTRG.35356.1	GO:0005516(calmodulin binding);GO:0009507(chloroplast);GO:0009522(photosystem I);GO:0009534(chloroplast thylakoid);GO:0009535(chloroplast thylakoid membrane);GO:0009543(chloroplast thylakoid lumen);GO:0009579(thylakoid);GO:0009773(photosynthetic electron transport in photosystem I);GO:0015979(photosynthesis);GO:0030093(chloroplast photosystem I)	00195(Photosynthesis)	K02701	NA	photosystem I reaction center subunit N, chloroplastic [Asparagus officinalis]	NA	99.0288	80.769	132.897	44.1685	18.3185	39.5277	3.08458	1.62508	0.00414808	0.512333	up	yes
MSTRG.28654	HHC036114;HHC036116;HHC036115;HHC036120	rna-HHC036114.1;MSTRG.28654.1;rna-HHC036115.1;rna-HHC036120.1	GO:0000786(nucleosome);GO:0003677(DNA binding);GO:0005634(nucleus);GO:0005794(Golgi apparatus);GO:0005829(cytosol);GO:0006334(nucleosome assembly);GO:0051276(chromosome organization);GO:0051276(chromosome organization)	NA	NA	NA	hypothetical protein EUGRSUZ_J02062, partial [Eucalyptus grandis]	NA	9.84881	8.06688	6.67291	3.26206	2.43454	2.41568	2.87107	1.52159	0.00416282	0.512333	up	yes
MSTRG.36099	HHC047511	MSTRG.36099.2;rna-HHC047511.1	GO:0004161(dimethylallyltranstransferase activity);GO:0004337(geranyltranstransferase activity);GO:0005737(cytoplasm);GO:0045337(farnesyl diphosphate biosynthetic process)	00900(Terpenoid backbone biosynthesis)	K00787	EC:2.5.1.1;EC:2.5.1.10	farnesyl diphosphate synthase [Asparagus officinalis]	NA	80.7727	58.7969	23.4747	13.0839	13.8416	9.38002	3.79233	1.92309	0.00420036	0.51294	up	yes
MSTRG.15270	HHC016034	MSTRG.15270.1;rna-HHC016034.1;rna-HHC016034.2	GO:0002094(polyprenyltransferase activity);GO:0005783(endoplasmic reticulum);GO:0006486(protein glycosylation);GO:0016094(polyprenol biosynthetic process);GO:0016094(polyprenol biosynthetic process)	00900(Terpenoid backbone biosynthesis);00900(Terpenoid backbone biosynthesis)	K11778	EC:2.5.1.87	dehydrodolichyl diphosphate synthase 6-like [Asparagus officinalis]	NA	0.00443718	4.73735	0.032508	7.05784	0.0584139	0.0495681	54.7875	5.77578	0.00421607	0.51294	up	yes
MSTRG.6817	HHC044381	rna-HHC044381.1	GO:0003677(DNA binding);GO:0003700(DNA binding transcription factor activity);GO:0005515(protein binding);GO:0005634(nucleus);GO:0006351(transcription, DNA-templated);GO:0006355(regulation of transcription, DNA-templated);GO:0009873(ethylene-activated signaling pathway);GO:0048573(photoperiodism, flowering)	NA	NA	NA	PREDICTED: AP2/ERF and B3 domain-containing transcription repressor RAV2-like [Elaeis guineensis]	NA	41.2122	13.6718	18.3276	8.15138	5.56962	6.00526	3.51463	1.81337	0.00421621	0.51294	up	yes
MSTRG.13771	HHC014062	rna-HHC014062.1;rna-HHC014062.2;MSTRG.13771.1	GO:0005829(cytosol);GO:0008964(phosphoenolpyruvate carboxylase activity);GO:0009507(chloroplast);GO:0048046(apoplast);GO:0048366(leaf development);GO:0048366(leaf development)	00740(Riboflavin metabolism);00740(Riboflavin metabolism)	K20884	EC:2.7.1.26;EC:3.1.3.102	PREDICTED: bifunctional riboflavin kinase/FMN phosphatase [Elaeis guineensis];uncharacterized protein A4U43_C05F18390 [Asparagus officinalis]	NA	18.7712	20.6507	3.10118	3.30805	2.333	2.54258	4.70008	2.23269	0.00423974	0.513833	up	yes
MSTRG.25575	HHC031175	rna-HHC031175.1;MSTRG.25575.3;MSTRG.25575.1;MSTRG.25575.2	GO:0003735(structural constituent of ribosome);GO:0006412(translation)	NA	NA	NA	mitochondrial uncoupling protein 5 [Phoenix dactylifera]	NA	511.306	468.416	380.861	224.229	18.9748	169.364	4.20734	2.07291	0.00431144	0.520489	up	yes
MSTRG.14291	HHC014792	rna-HHC014792.1;rna-HHC014792.3;rna-HHC014792.2	GO:0005773(vacuole);GO:0005774(vacuolar membrane);GO:0006508(proteolysis);GO:0006751(glutathione catabolic process);GO:0006805(xenobiotic metabolic process);GO:0009636(response to toxic substance);GO:0016021(integral component of membrane);GO:0016756(glutathione gamma-glutamylcysteinyltransferase activity);GO:0036374(glutathione hydrolase activity);GO:0102953(hypoglycin A gamma-glutamyl transpept…	00590(Arachidonic acid metabolism);00430(Taurine and hypotaurine metabolism);00460(Cyanoamino acid metabolism);00480(Glutathione metabolism);00480(Glutathione metabolism)	K18592	EC:2.3.2.2;EC:3.4.19.13	gamma-glutamyl transpeptidase [Allium sativum];gamma-glutamyltranspeptidase 3-like isoform X1 [Asparagus officinalis]	NA	11.9336	13.9216	7.97381	3.36161	2.70338	3.22449	3.13693	1.64935	0.00432744	0.520489	up	yes
gene-HHC018876	HHC018876	rna-HHC018876.1	GO:0003674(molecular_function);GO:0005739(mitochondrion);GO:0008150(biological_process);GO:0016021(integral component of membrane)	NA	NA	NA	hypothetical protein AQUCO_01800149v1 [Aquilegia coerulea]	NA	0.782213	3.64733	3.71794	0.0001	0.0749604	0.0001	54.2735	5.76218	0.00439435	0.525324	up	yes
MSTRG.30164		MSTRG.30164.1	NA	NA	NA	NA		NA	0.0001	15.6825	8.53139	0.0001	0.0001	0.0001	60535.2	15.8855	0.00440072	0.525324	up	yes
MSTRG.28348	HHC035695	rna-HHC035695.1	GO:0003674(molecular_function);GO:0005886(plasma membrane);GO:0009814(defense response, incompatible interaction);GO:0009863(salicylic acid mediated signaling pathway)	NA	NA	NA	NDR1/HIN1-like protein 6 [Phoenix dactylifera]	NA	30.906	11.6298	30.2289	8.76979	3.41533	5.6539	4.49512	2.16836	0.00446435	0.528544	up	yes
MSTRG.36017	HHC050837	rna-HHC050837.1	GO:0003674(molecular_function);GO:0008150(biological_process);GO:0009507(chloroplast);GO:0009535(chloroplast thylakoid membrane);GO:0016021(integral component of membrane)	NA	NA	NA	uncharacterized protein LOC103707627 isoform X1 [Phoenix dactylifera]	NA	2.93649	2.99639	2.30927	0.752576	0.190574	0.660819	5.28236	2.40118	0.00448333	0.528544	up	yes
MSTRG.4131	HHC006077	MSTRG.4131.1;rna-HHC006077.1	GO:0016787(hydrolase activity)	NA	NA	NA	uncharacterized protein C24B11.05-like isoform X1 [Asparagus officinalis]	NA	13.4665	10.7179	0.971789	1.1762	0.596237	1.00306	8.23251	3.04133	0.00449349	0.528544	up	yes
MSTRG.33489	HHC052922	rna-HHC052922.1;MSTRG.33489.2	GO:0003746(translation elongation factor activity);GO:0003924(GTPase activity);GO:0005622(intracellular);GO:0032790(ribosome disassembly)	NA	NA	NA	PREDICTED: elongation factor G-2, chloroplastic [Elaeis guineensis]	NA	654.359	104.244	345.75	131.629	71.0932	81.9331	4.03846	2.01381	0.00449428	0.528544	up	yes
gene-HHC017860	HHC017860	rna-HHC017860.1	GO:0004837(tyrosine decarboxylase activity);GO:0005737(cytoplasm);GO:0006520(cellular amino acid metabolic process);GO:0006559(L-phenylalanine catabolic process);GO:0009611(response to wounding);GO:0016740(transferase activity);GO:0016831(carboxy-lyase activity);GO:0030170(pyridoxal phosphate binding);GO:1990055(phenylacetaldehyde synthase activity)	00350(Tyrosine metabolism);00360(Phenylalanine metabolism);00380(Tryptophan metabolism);00901(Indole alkaloid biosynthesis);00950(Isoquinoline alkaloid biosynthesis);00965(Betalain biosynthesis)	K01593	EC:4.1.1.28;EC:4.1.1.105	tyrosine/DOPA decarboxylase 1-like [Phoenix dactylifera]	NA	1.3187	1.14596	0.135055	0.125317	0.0001	0.0562091	24.197	4.59676	0.00452007	0.529615	up	yes
MSTRG.23744	HHC028562	MSTRG.23744.1;rna-HHC028562.1	GO:0005829(cytosol);GO:0009611(response to wounding);GO:0016787(hydrolase activity);GO:0046872(metal ion binding)	NA	NA	NA	nudix hydrolase 8-like [Asparagus officinalis]	NA	64.0047	59.0161	2.507	4.40893	4.3147	3.35594	8.46974	3.08232	0.00458079	0.534756	up	yes
MSTRG.16498	HHC017664	rna-HHC017664.1;MSTRG.16498.1;MSTRG.16498.2	GO:0000139(Golgi membrane);GO:0005794(Golgi apparatus);GO:0009506(plasmodesma);GO:0016021(integral component of membrane);GO:0016757(transferase activity, transferring glycosyl groups);GO:0016759(cellulose synthase activity);GO:0071555(cell wall organization)	NA	NA	NA	LOW QUALITY PROTEIN: probable xyloglucan glycosyltransferase 9 [Asparagus officinalis]	NA	7.90838	7.7715	19.685	18.0125	39.7533	41.9292	0.326738	-1.61379	0.00461945	0.537294	down	yes
MSTRG.11407	HHC010567	rna-HHC010567.1	GO:0003677(DNA binding);GO:0003700(DNA binding transcription factor activity);GO:0005515(protein binding);GO:0005634(nucleus);GO:0006351(transcription, DNA-templated);GO:0006355(regulation of transcription, DNA-templated);GO:0009845(seed germination);GO:0043565(sequence-specific DNA binding);GO:0044212(transcription regulatory region DNA binding);GO:0046982(protein heterodimerization activity)	NA	NA	NA	bZIP transcription factor 44-like [Asparagus officinalis]	NA	169.25	36.5555	7.39679	7.20272	6.93448	5.85581	8.61609	3.10703	0.00468268	0.540205	up	yes
MSTRG.22515	HHC026790	rna-HHC026790.1	NA	NA	NA	NA	uncharacterized protein A4U43_C03F7980 [Asparagus officinalis]	NA	7.39098	5.46047	1.80867	0.751823	0.570186	0.277723	9.08821	3.184	0.00468449	0.540205	up	yes
MSTRG.15621		MSTRG.15621.1;MSTRG.15621.2	NA	NA	NA	NA		NA	562.859	96.3455	49.4956	26.4649	25.7694	24.4354	7.32166	2.87217	0.00469551	0.540205	up	yes
MSTRG.15761	HHC016669	rna-HHC016669.1;rna-HHC016669.2	GO:0051213(dioxygenase activity);GO:0051213(dioxygenase activity)	00270(Cysteine and methionine metabolism);00941(Flavonoid biosynthesis);00941(Flavonoid biosynthesis)	K05278;K05933	EC:1.14.20.6;EC:1.14.17.4	S-norcoclaurine synthase 1-like [Phoenix dactylifera]	NA	15.4316	7.68943	5.3049	3.1863	2.6684	2.25641	3.20949	1.68234	0.00473803	0.543129	up	yes
MSTRG.4428	HHC040817	rna-HHC040817.4;rna-HHC040817.1;rna-HHC040817.2;rna-HHC040817.3	GO:0001056(RNA polymerase III activity);GO:0005666(DNA-directed RNA polymerase III complex);GO:0005666(DNA-directed RNA polymerase III complex)	00230(Purine metabolism);00240(Pyrimidine metabolism);03020(RNA polymerase);03020(RNA polymerase)	K03023	NA	uncharacterized protein A4U43_C05F19650 [Asparagus officinalis];PREDICTED: DNA-directed RNA polymerase III subunit rpc3 [Elaeis guineensis]	NA	8.67016	6.35021	4.70646	5.54237	2.31111	1.65679	3.1842	1.67093	0.0047764	0.544593	up	yes
MSTRG.12243	HHC011670	rna-HHC011670.1	NA	NA	NA	NA	uncharacterized protein A4U43_C01F25120 [Asparagus officinalis]	NA	7.87017	5.09649	3.4522	0.486358	0.827207	0.528852	6.23322	2.63998	0.00482813	0.544593	up	yes
MSTRG.13407	HHC013565;HHC013566	rna-HHC013565.1;rna-HHC013566.1;MSTRG.13407.1;MSTRG.13407.2	GO:0005515(protein binding);GO:0005634(nucleus);GO:0006792(regulation of sulfur utilization);GO:0010438(cellular response to sulfur starvation);GO:0010439(regulation of glucosinolate biosynthetic process);GO:0090568(nuclear transcriptional repressor complex);GO:0090568(nuclear transcriptional repressor complex)	NA	NA	NA	protein SULFUR DEFICIENCY-INDUCED 1-like [Phoenix dactylifera]	NA	8.225	75.6293	241.891	8.30003	9.42517	8.36791	9.38693	3.23065	0.00483968	0.544593	up	yes
MSTRG.8092	HHC046447;HHC046446	rna-HHC046447.1;MSTRG.8092.1;rna-HHC046447.2;rna-HHC046446.1;MSTRG.8092.4	GO:0051213(dioxygenase activity);GO:0051213(dioxygenase activity)	00941(Flavonoid biosynthesis);00940(Phenylpropanoid biosynthesis)	K05278;K06892	EC:1.14.20.6;EC:1.14.11.-	S-norcoclaurine synthase 1-like [Asparagus officinalis]	NA	36.2176	16.5307	2.36395	2.29157	1.45883	1.64581	9.24484	3.20865	0.00485706	0.544593	up	yes
MSTRG.10267	HHC008852	rna-HHC008852.1	GO:0005515(protein binding);GO:0005516(calmodulin binding);GO:0005634(nucleus);GO:0009414(response to water deprivation);GO:0009651(response to salt stress);GO:0010337(regulation of salicylic acid metabolic process)	NA	NA	NA	calmodulin-binding protein 25-like [Dendrobium catenatum]	NA	9.20722	11.372	63.1909	5.11567	3.42504	3.97883	6.00265	2.5856	0.0048732	0.544593	up	yes
MSTRG.21883	HHC025569	rna-HHC025569.1	GO:0005509(calcium ion binding)	NA	NA	NA	calcium-binding protein SPEC 2C-like [Asparagus officinalis]	NA	12.369	36.3114	4.39362	2.69179	2.38084	2.22311	6.0563	2.59844	0.00487899	0.544593	up	yes
MSTRG.6079	HHC043367	rna-HHC043367.2;MSTRG.6079.3;rna-HHC043367.1	GO:0005524(ATP binding);GO:0005737(cytoplasm);GO:0005739(mitochondrion);GO:0005829(cytosol);GO:0009506(plasmodesma);GO:0009507(chloroplast);GO:0009570(chloroplast stroma);GO:0009735(response to cytokinin);GO:0010030(positive regulation of seed germination);GO:0010214(seed coat development);GO:0016208(AMP binding);GO:0033611(oxalate catabolic process);GO:0046686(response to cadmium ion);GO:0048046…	00630(Glyoxylate and dicarboxylate metabolism);00630(Glyoxylate and dicarboxylate metabolism)	K22133	EC:6.2.1.8	4-coumarate:CoA ligase-like protein [Ornithogalum longebracteatum]	NA	258.841	101.44	37.1865	16.8567	17.7595	20.1681	5.46204	2.44944	0.00490075	0.544593	up	yes
gene-HHC043529	HHC043529	rna-HHC043529.1	GO:0005634(nucleus);GO:0006355(regulation of transcription, DNA-templated);GO:0044212(transcription regulatory region DNA binding)	04933(AGE-RAGE signaling pathway in diabetic complications)	K06236	NA	putative Myb family transcription factor At1g14600 isoform X1 [Asparagus officinalis]	NA	0.0001	0.0001	0.0001	0.169087	0.563955	0.876938	0.0587785	-4.08857	0.00491178	0.544593	down	yes
MSTRG.13628		MSTRG.13628.1	NA	NA	NA	NA		NA	0.136838	0.720697	0.673071	2.14456	4.63608	4.28761	0.205922	-2.27983	0.00491641	0.544593	down	yes
MSTRG.30044	HHC038166	rna-HHC038166.1	GO:0005515(protein binding);GO:0005737(cytoplasm);GO:0005739(mitochondrion);GO:0005829(cytosol);GO:0009507(chloroplast);GO:0009535(chloroplast thylakoid membrane);GO:0009570(chloroplast stroma);GO:0009814(defense response, incompatible interaction);GO:0009941(chloroplast envelope);GO:0010363(regulation of plant-type hypersensitive response);GO:0015996(chlorophyll catabolic process);GO:0043067(reg…	00860(Porphyrin and chlorophyll metabolism)	K13545	EC:1.3.7.12	red chlorophyll catabolite reductase [Asparagus officinalis]	NA	43.3756	18.8623	18.7055	6.62836	4.11101	6.95256	3.95766	1.98465	0.00492231	0.544593	up	yes
MSTRG.25135	HHC030468	rna-HHC030468.1	GO:0005634(nucleus);GO:0008150(biological_process);GO:0030246(carbohydrate binding)	NA	NA	NA	uncharacterized protein A4U43_C06F1060 [Asparagus officinalis]	NA	201.507	95.1647	9.40975	8.01568	11.7496	7.23532	8.27228	3.04829	0.00498034	0.5491	up	yes
MSTRG.33727	HHC053514	MSTRG.33727.1;rna-HHC053514.1	GO:0003674(molecular_function);GO:0005634(nucleus)	NA	NA	NA	PREDICTED: uncharacterized protein LOC105039376 [Elaeis guineensis]	NA	4.69242	1.18522	2.34138	0.299264	0.317505	0.0901463	10.448	3.38516	0.00501875	0.550551	up	yes
MSTRG.7117	HHC044704;HHC044708	MSTRG.7117.2;MSTRG.7117.1	NA	NA	NA	NA		NA	19.4697	5.889	1.82269	1.66718	1.31146	0.478973	8.05628	3.01011	0.00502818	0.550551	up	yes
MSTRG.7413	HHC045089	rna-HHC045089.1	GO:0005507(copper ion binding);GO:0009505(plant-type cell wall);GO:0009506(plasmodesma);GO:0016722(oxidoreductase activity, oxidizing metal ions)	NA	NA	NA	LOW QUALITY PROTEIN: L-ascorbate oxidase homolog [Asparagus officinalis]	NA	1.5473	6.72505	6.13656	0.236193	0.0001	0.418613	17.4882	4.12831	0.00507636	0.551884	up	yes
MSTRG.10121	HHC008642	rna-HHC008642.1	GO:0005198(structural molecule activity);GO:0005634(nucleus);GO:0005886(plasma membrane);GO:0009507(chloroplast);GO:0009534(chloroplast thylakoid);GO:0009535(chloroplast thylakoid membrane);GO:0009579(thylakoid);GO:0009658(chloroplast organization);GO:0009941(chloroplast envelope);GO:0010193(response to ozone);GO:0010287(plastoglobule);GO:0016020(membrane);GO:0031977(thylakoid lumen);GO:0042742(d…	NA	NA	NA	Plastid lipid-associated protein/fibrillin conserved domain [Macleaya cordata]	NA	2.65513	1.45167	0.0001	0.0001	0.0001	0.0001	10267.5	13.3258	0.00507943	0.551884	up	yes
MSTRG.32342		MSTRG.32342.1	NA	NA	NA	NA		NA	8.09892	5.78681	0.183708	0.402438	0.252828	0.24977	14.3971	3.8477	0.00509351	0.551884	up	yes
MSTRG.4944	HHC041738	rna-HHC041738.1	GO:0003700(DNA binding transcription factor activity);GO:0005634(nucleus);GO:0006351(transcription, DNA-templated);GO:0006355(regulation of transcription, DNA-templated);GO:0009555(pollen development);GO:0009793(embryo development ending in seed dormancy);GO:0043565(sequence-specific DNA binding)	04016(MAPK signaling pathway - plant)	K13425	NA	DNA-binding WRKY [Cinnamomum micranthum f. kanehirae]	NA	2.88999	0.29917	1.97809	1.79876	0.0001	0.226848	15.3471	3.9399	0.00510987	0.551884	up	yes
MSTRG.28771	HHC036304	MSTRG.28771.2;rna-HHC036304.1	GO:0005886(plasma membrane);GO:0006810(transport);GO:0022857(transmembrane transporter activity)	NA	NA	NA	WAT1-related protein At1g44800-like isoform X1 [Asparagus officinalis]	NA	96.7396	112.375	3.52924	6.46955	6.66298	5.47869	9.0232	3.17364	0.00515709	0.555095	up	yes
MSTRG.20649	HHC023635	MSTRG.20649.3;MSTRG.20649.1;rna-HHC023635.1	GO:0005515(protein binding);GO:0005886(plasma membrane);GO:0007165(signal transduction);GO:0009507(chloroplast);GO:0009535(chloroplast thylakoid membrane);GO:0009579(thylakoid);GO:0009658(chloroplast organization);GO:0016020(membrane);GO:0016021(integral component of membrane);GO:0051205(protein insertion into membrane);GO:0072598(protein localization to chloroplast)	03060(Protein export)	K03217	NA	ALBINO3-like protein 1, chloroplastic [Asparagus officinalis]	NA	74.7458	105.774	120.26	112.922	45.6059	41.1248	2.38498	1.25398	0.00517888	0.5554	up	yes
MSTRG.27935	HHC035145	rna-HHC035145.1	NA	NA	NA	NA	uncharacterized protein A4U43_C02F20650 [Asparagus officinalis]	NA	18.2313	28.2543	8.82691	4.56102	3.51922	4.95522	3.5326	1.82073	0.00519953	0.5554	up	yes
MSTRG.15210	HHC015968	MSTRG.15210.2;rna-HHC015968.2;rna-HHC015968.1	GO:0003674(molecular_function);GO:0008150(biological_process);GO:0009507(chloroplast);GO:0009507(chloroplast)	04141(Protein processing in endoplasmic reticulum);04120(Ubiquitin mediated proteolysis);03420(Nucleotide excision repair);03420(Nucleotide excision repair)	K03868	EC:2.3.2.32	GEM-like protein 1 [Ananas comosus];PREDICTED: GEM-like protein 1 [Musa acuminata subsp. malaccensis]	NA	11.2615	19.6428	5.58189	3.18694	3.65891	0.884531	4.36599	2.12631	0.00521888	0.5554	up	yes
gene-HHC001596	HHC001596	rna-HHC001596.1	GO:0005576(extracellular region);GO:0016021(integral component of membrane);GO:0016757(transferase activity, transferring glycosyl groups)	00515(Mannose type O-glycan biosyntheis)	K18207	EC:2.4.1.312	PREDICTED: uncharacterized protein LOC103990157 [Musa acuminata subsp. malaccensis]	NA	1.18167	0.406461	0.0001	0.0001	0.0001	0.0001	3970.84	11.9552	0.00522989	0.5554	up	yes
MSTRG.3101	HHC004397	rna-HHC004397.1	NA	04141(Protein processing in endoplasmic reticulum);04626(Plant-pathogen interaction)	K04079	NA	PREDICTED: uncharacterized protein LOC103995568 isoform X3 [Musa acuminata subsp. malaccensis]	NA	3.09398	2.51154	0.202771	0.0001	0.0291534	0.0001	99.2773	6.63339	0.00527993	0.557719	up	yes
MSTRG.35903	HHC049982	rna-HHC049982.1	GO:0005634(nucleus);GO:0006807(nitrogen compound metabolic process);GO:0060776(simple leaf morphogenesis)	NA	NA	NA	PREDICTED: LOB domain-containing protein 37-like [Musa acuminata subsp. malaccensis]	NA	29.0986	45.3706	81.021	15.7277	14.3157	11.547	3.31013	1.72689	0.00528685	0.557719	up	yes
MSTRG.32844		MSTRG.32844.1	NA	NA	NA	NA		NA	0.250112	3.95973	2.7163	3.35129	25.0454	6.3025	0.163925	-2.60889	0.00533115	0.56053	down	yes
MSTRG.28305	HHC035628	rna-HHC035628.1	GO:0000786(nucleosome);GO:0003677(DNA binding);GO:0005634(nucleus);GO:0005794(Golgi apparatus);GO:0005829(cytosol);GO:0006334(nucleosome assembly);GO:0051276(chromosome organization)	NA	NA	NA	putative histone H9 [Helianthus annuus]	NA	73.5039	88.2468	57.818	29.7204	24.0736	21.3732	2.74265	1.45557	0.00537035	0.562788	up	yes
MSTRG.22205	HHC026169	MSTRG.22205.1	NA	NA	NA	NA		NA	5.5759	2.19934	0.54415	0.252341	0.265183	0.0813026	12.3695	3.62872	0.0053928	0.563282	up	yes
MSTRG.16788	HHC018065	rna-HHC018065.1	NA	NA	NA	NA	PREDICTED: protein PHLOEM PROTEIN 2-LIKE A1-like [Tarenaya hassleriana]	NA	128.087	71.0694	1.68854	3.88878	4.03542	4.06512	12.6371	3.65959	0.00543346	0.563337	up	yes
MSTRG.293	HHC000321	rna-HHC000321.1	GO:0016787(hydrolase activity)	NA	NA	NA	probable strigolactone esterase DAD2 [Asparagus officinalis]	NA	32.6991	9.80283	3.07328	0.928441	0.994162	1.3157	10.0663	3.33147	0.00547886	0.563337	up	yes
MSTRG.36030	HHC052431	MSTRG.36030.2;rna-HHC052431.1	GO:0005829(cytosol);GO:0009611(response to wounding);GO:0016787(hydrolase activity);GO:0046872(metal ion binding)	NA	NA	NA	PREDICTED: nudix hydrolase 8-like [Elaeis guineensis]	NA	176.917	108.43	3.16173	7.04313	7.70509	6.07411	10.7246	3.42285	0.00548777	0.563337	up	yes
MSTRG.6883	HHC044459	rna-HHC044459.1;MSTRG.6883.2	GO:0000932(P-body);GO:0003729(mRNA binding);GO:0005515(protein binding);GO:0005829(cytosol);GO:0006397(mRNA processing);GO:0010606(positive regulation of cytoplasmic mRNA processing body assembly);GO:0017148(negative regulation of translation);GO:0031087(deadenylation-independent decapping of nuclear-transcribed mRNA);GO:0033962(cytoplasmic mRNA processing body assembly);GO:0042803(protein homodi…	NA	NA	NA	PREDICTED: protein decapping 5 [Elaeis guineensis]	NA	5.59392	5.43733	5.0099	1.12539	1.1477	1.29148	3.51891	1.81513	0.00548954	0.563337	up	yes
MSTRG.31163	HHC039783	MSTRG.31163.1;rna-HHC039783.1	GO:0004601(peroxidase activity);GO:0005576(extracellular region);GO:0005773(vacuole);GO:0005829(cytosol);GO:0006979(response to oxidative stress);GO:0009505(plant-type cell wall);GO:0009809(lignin biosynthetic process);GO:0010228(vegetative to reproductive phase transition of meristem);GO:0020037(heme binding);GO:0042744(hydrogen peroxide catabolic process);GO:0046872(metal ion binding);GO:005511…	00940(Phenylpropanoid biosynthesis)	K00430	EC:1.11.1.7	peroxidase 17 [Ananas comosus]	NA	56.1197	32.1182	3.91817	2.74726	3.38066	2.17835	8.53598	3.09356	0.00550063	0.563337	up	yes
MSTRG.31924	HHC051017	MSTRG.31924.1;rna-HHC051017.1	GO:0005515(protein binding);GO:0005634(nucleus);GO:0005737(cytoplasm)	NA	NA	NA	B2 protein-like [Asparagus officinalis]	NA	21.1094	6.03506	7.05555	15.127	0.653143	5.16042	4.24242	2.08489	0.00551215	0.563337	up	yes
MSTRG.28610	HHC036067	rna-HHC036067.1;MSTRG.28610.2	GO:0005777(peroxisome);GO:0006631(fatty acid metabolic process);GO:0016874(ligase activity)	NA	NA	NA	PREDICTED: probable acyl-activating enzyme 5, peroxisomal [Elaeis guineensis]	NA	261.98	77.8327	55.4947	14.8505	20.0964	20.3327	5.07256	2.34271	0.00551848	0.563337	up	yes
MSTRG.30966	HHC039536	MSTRG.30966.3;MSTRG.30966.1;rna-HHC039536.1;MSTRG.30966.2	GO:0003755(peptidyl-prolyl cis-trans isomerase activity);GO:0005575(cellular_component);GO:0016853(isomerase activity)	NA	NA	NA	peptidyl-prolyl cis-trans isomerase NIMA-interacting 4 [Arabidopsis lyrata subsp. lyrata]	NA	23.6717	28.3271	27.0405	24.2011	11.3775	10.9101	2.31611	1.2117	0.00553526	0.563337	up	yes
MSTRG.16919	HHC018242	MSTRG.16919.2;rna-HHC018242.1;rna-HHC018242.2	GO:0005773(vacuole);GO:0005783(endoplasmic reticulum);GO:0005886(plasma membrane);GO:0009058(biosynthetic process);GO:0009505(plant-type cell wall);GO:0009506(plasmodesma);GO:0009507(chloroplast);GO:0009821(alkaloid biosynthetic process);GO:0016844(strictosidine synthase activity);GO:0016020(membrane);GO:0016788(hydrolase activity, acting on ester bonds);GO:0016788(hydrolase activity, acting on e…	NA	NA	NA	uncharacterized protein A4U43_C02F18510 [Asparagus officinalis]	NA	18.0775	5.49804	2.11145	0.711344	1.08639	0.421297	8.75461	3.13004	0.0056067	0.565128	up	yes
MSTRG.2723	HHC003777	rna-HHC003777.1	GO:0003735(structural constituent of ribosome);GO:0006412(translation)	NA	NA	NA	PREDICTED: mitoferrin [Elaeis guineensis]	NA	288.764	95.7759	32.1219	20.9886	20.1033	19.9652	5.46128	2.44924	0.00560853	0.565128	up	yes
MSTRG.17746	HHC019440	MSTRG.17746.2;MSTRG.17746.1;rna-HHC019440.1	NA	NA	NA	NA		NA	1.1044	108.171	13.8831	0.368929	1.57584	0.52588	29.3871	4.87711	0.00562747	0.565128	up	yes
MSTRG.20641	HHC023618	MSTRG.20641.1;rna-HHC023618.1	GO:0003993(acid phosphatase activity);GO:0004722(protein serine/threonine phosphatase activity);GO:0004725(protein tyrosine phosphatase activity);GO:0004726(non-membrane spanning protein tyrosine phosphatase activity);GO:0005634(nucleus);GO:0005829(cytosol);GO:0008150(biological_process)	NA	NA	NA	uncharacterized protein LOC109826878, partial [Asparagus officinalis]	NA	83.9192	67.8843	62.0208	22.1467	19.9597	21.88	2.81994	1.49566	0.0056296	0.565128	up	yes
MSTRG.1192	HHC001480;HHC001481	rna-HHC001480.1;rna-HHC001481.1;rna-HHC001480.5;rna-HHC001480.2;MSTRG.1192.1;rna-HHC001480.3;rna-HHC001480.4	GO:0005634(nucleus);GO:0005739(mitochondrion);GO:0006511(ubiquitin-dependent protein catabolic process);GO:0008237(metallopeptidase activity);GO:0046872(metal ion binding);GO:0046872(metal ion binding)	04144(Endocytosis);04144(Endocytosis)	K11866	EC:3.4.19.12	AMSH-like ubiquitin thioesterase 2 isoform X1 [Asparagus officinalis]	NA	30.5956	27.1271	53.7493	7.25534	11.233	3.80127	3.94857	1.98133	0.00564853	0.565128	up	yes
MSTRG.3383	HHC004950	rna-HHC004950.1;MSTRG.3383.2	GO:0000149(SNARE binding);GO:0005484(SNAP receptor activity);GO:0005886(plasma membrane);GO:0006886(intracellular protein transport);GO:0006887(exocytosis);GO:0006906(vesicle fusion);GO:0012505(endomembrane system);GO:0016021(integral component of membrane);GO:0031201(SNARE complex);GO:0048278(vesicle docking)	04130(SNARE interactions in vesicular transport)	K08486	NA	PREDICTED: syntaxin-121-like [Elaeis guineensis]	NA	31.9754	24.2439	55.9823	12.3407	10.5061	10.2728	2.99683	1.58344	0.00565964	0.565128	up	yes
MSTRG.4407	HHC040790	rna-HHC040790.2;rna-HHC040790.1	GO:0003674(molecular_function);GO:0005783(endoplasmic reticulum);GO:0010008(endosome membrane);GO:0016021(integral component of membrane);GO:0016192(vesicle-mediated transport);GO:0016192(vesicle-mediated transport)	NA	NA	NA	PREDICTED: PRA1 family protein B3-like [Vigna angularis];PRA1 family protein B3-like [Phoenix dactylifera]	NA	27.4669	36.4191	85.0058	33.9332	16.1117	16.7662	2.78036	1.47527	0.00568033	0.565416	up	yes
MSTRG.8455	HHC047022	rna-HHC047022.1	GO:0003735(structural constituent of ribosome);GO:0005737(cytoplasm);GO:0005774(vacuolar membrane);GO:0005794(Golgi apparatus);GO:0005840(ribosome);GO:0006412(translation);GO:0009506(plasmodesma);GO:0022626(cytosolic ribosome);GO:0022627(cytosolic small ribosomal subunit)	03010(Ribosome)	K02975	NA	40S ribosomal protein S25-2 [Panicum hallii]	NA	0.0001	21.2363	0.0001	6.26525	0.0001	0.0001	68754.3	16.0692	0.00570928	0.566521	up	yes
MSTRG.21653	HHC025267	MSTRG.21653.1	NA	NA	NA	NA		NA	36.1373	9.05996	17.3802	2.3724	2.98697	1.99906	6.51318	2.70336	0.00574189	0.567982	up	yes
MSTRG.16389	HHC017475;HHC017476;HHC017477	MSTRG.16389.5;MSTRG.16389.6;MSTRG.16389.3;MSTRG.16389.9;rna-HHC017475.2;MSTRG.16389.18;MSTRG.16389.10;MSTRG.16389.7;MSTRG.16389.15;rna-HHC017476.1;MSTRG.16389.2;MSTRG.16389.4;MSTRG.16389.14;MSTRG.16389.17;MSTRG.16389.11;MSTRG.16389.12;rna-HHC017475.1;MSTRG.16389.8;rna-HHC017477.1	GO:0004033(aldo-keto reductase (NADP) activity);GO:0005737(cytoplasm);GO:0005886(plasma membrane);GO:0009941(chloroplast envelope);GO:0016491(oxidoreductase activity);GO:0055114(oxidation-reduction process);GO:0055114(oxidation-reduction process)	00053(Ascorbate and aldarate metabolism);00750(Vitamin B6 metabolism)	K17744;K05275	EC:1.1.1.316;EC:1.1.1.65	probable aldo-keto reductase 1 [Phoenix dactylifera];PREDICTED: probable aldo-keto reductase 1 [Elaeis guineensis]	NA	190.086	61.5386	29.1413	21.9399	13.1192	20.4253	4.512	2.17377	0.00579047	0.56857	up	yes
MSTRG.30700	HHC039180	rna-HHC039180.1	GO:0003755(peptidyl-prolyl cis-trans isomerase activity)	NA	NA	NA	PREDICTED: peptidyl-prolyl cis-trans isomerase-like [Populus euphratica]	NA	2132.41	2556.54	639.359	382.251	363.213	360.559	3.945	1.98003	0.0058168	0.56857	up	yes
MSTRG.34398	HHC053217	rna-HHC053217.1	NA	NA	NA	NA		NA	22.5108	32.5282	10.2755	8.41442	4.36798	6.41011	3.42032	1.77413	0.00581765	0.56857	up	yes
MSTRG.25764	HHC031584	rna-HHC031584.1	NA	NA	NA	NA	PREDICTED: uncharacterized protein LOC103980499 [Musa acuminata subsp. malaccensis]	NA	25.3477	40.8348	1.91909	3.78833	2.52781	2.33996	7.38428	2.88446	0.00583104	0.56857	up	yes
MSTRG.22914	HHC027405	MSTRG.22914.1;rna-HHC027405.1	GO:0004180(carboxypeptidase activity);GO:0005515(protein binding);GO:0005789(endoplasmic reticulum membrane);GO:0005886(plasma membrane);GO:0006508(proteolysis);GO:0009640(photomorphogenesis);GO:0009793(embryo development ending in seed dormancy);GO:0009908(flower development);GO:0009910(negative regulation of flower development);GO:0010305(leaf vascular tissue pattern formation);GO:0016805(dipep…	NA	NA	NA	PREDICTED: probable glutamate carboxypeptidase 2 isoform X1 [Elaeis guineensis]	NA	7.32634	7.85506	1.59433	0.788171	0.800337	0.693076	5.88046	2.55593	0.00583737	0.56857	up	yes
MSTRG.30011	HHC038126	rna-HHC038126.1;MSTRG.30011.1	NA	NA	NA	NA	hypothetical protein TorRG33x02_095820 [Trema orientale]	NA	46.7629	40.0773	17.3497	8.33571	7.95591	8.93608	3.33074	1.73584	0.00586059	0.569087	up	yes
MSTRG.20162	HHC022961	rna-HHC022961.1	GO:0003677(DNA binding);GO:0003700(DNA binding transcription factor activity);GO:0005634(nucleus);GO:0006351(transcription, DNA-templated);GO:0006355(regulation of transcription, DNA-templated);GO:0009873(ethylene-activated signaling pathway)	NA	NA	NA	hypothetical protein CTI12_AA385770 [Artemisia annua]	NA	3.37892	1.60209	5.24996	2.16627	0.912829	1.02675	3.19586	1.6762	0.00589896	0.569693	up	yes
MSTRG.8527	HHC047143	MSTRG.8527.1	NA	NA	NA	NA		NA	11.2436	1.88753	0.967655	0.976337	0.267243	0.653856	8.1832	3.03267	0.00590272	0.569693	up	yes
MSTRG.27510		MSTRG.27510.1	NA	NA	NA	NA		NA	8.95494	3.01508	2.23006	1.05109	0.689997	0.690454	5.52398	2.46571	0.00596632	0.574087	up	yes
MSTRG.30535	HHC038968	MSTRG.30535.1;rna-HHC038968.1	GO:0005886(plasma membrane);GO:0006810(transport);GO:0022857(transmembrane transporter activity)	NA	NA	NA	WAT1-related protein At3g30340-like [Asparagus officinalis]	NA	20.3929	6.19228	0.145434	0.0779227	0.262008	0.288343	24.3559	4.6062	0.00600576	0.575887	up	yes
MSTRG.6668	HHC044156	MSTRG.6668.1	NA	NA	NA	NA		NA	12.0803	7.00548	9.2323	8.12931	2.16513	3.05593	3.49042	1.8034	0.00606629	0.575887	up	yes
MSTRG.33604	HHC048018	rna-HHC048018.1	GO:0008150(biological_process);GO:0009507(chloroplast)	NA	NA	NA	PREDICTED: uncharacterized protein LOC105040320 isoform X2 [Elaeis guineensis]	NA	126.333	67.1521	39.4599	34.2462	18.4495	24.0884	3.14062	1.65105	0.00608536	0.575887	up	yes
MSTRG.35865	HHC052390	rna-HHC052390.1;MSTRG.35865.3;MSTRG.35865.2	GO:0003677(DNA binding);GO:0003700(DNA binding transcription factor activity);GO:0005515(protein binding);GO:0005634(nucleus);GO:0006351(transcription, DNA-templated);GO:0006355(regulation of transcription, DNA-templated);GO:0009555(pollen development);GO:0009793(embryo development ending in seed dormancy);GO:0010262(somatic embryogenesis);GO:0016602(CCAAT-binding factor complex);GO:0045892(negat…	NA	NA	NA	uncharacterized protein A4U43_C08F9830 [Asparagus officinalis]	NA	14.3555	23.8044	58.454	53.1777	59.538	212.228	0.275589	-1.85941	0.00610626	0.575887	down	yes
MSTRG.33885		MSTRG.33885.1	NA	NA	NA	NA		NA	10.1362	15.4763	8.29612	3.06778	3.58057	2.21407	3.19057	1.67381	0.00611214	0.575887	up	yes
MSTRG.14150	HHC014585	MSTRG.14150.1;rna-HHC014585.1	GO:0005887(integral component of plasma membrane);GO:0015116(sulfate transmembrane transporter activity)	NA	NA	NA	low affinity sulfate transporter 3 [Asparagus officinalis]	NA	3.68776	27.0435	15.1536	2.48636	2.27015	2.85978	4.71462	2.23714	0.00612202	0.575887	up	yes
MSTRG.18165	HHC020251	MSTRG.18165.1;rna-HHC020251.1	GO:0005737(cytoplasm);GO:0030001(metal ion transport);GO:0046914(transition metal ion binding);GO:0046916(cellular transition metal ion homeostasis)	NA	NA	NA	PREDICTED: heavy metal-associated isoprenylated plant protein 39 [Elaeis guineensis]	NA	21.8035	24.6008	13.1333	4.64071	5.11015	4.13774	3.46989	1.79489	0.00612471	0.575887	up	yes
MSTRG.35780	HHC054279	rna-HHC054279.1	GO:0003700(DNA binding transcription factor activity);GO:0005515(protein binding);GO:0005634(nucleus);GO:0006351(transcription, DNA-templated);GO:0006355(regulation of transcription, DNA-templated);GO:0009414(response to water deprivation);GO:0009735(response to cytokinin);GO:0009737(response to abscisic acid);GO:0009738(abscisic acid-activated signaling pathway);GO:0043565(sequence-specific DNA …	NA	NA	NA	PREDICTED: homeobox-leucine zipper protein HAT22-like [Nelumbo nucifera]	NA	73.5587	32.3604	6.63167	5.35196	5.65957	3.35302	6.541	2.70951	0.00613012	0.575887	up	yes
MSTRG.8992	HHC006608	rna-HHC006608.1	GO:0006952(defense response)	NA	NA	NA	protein LURP-one-related 12-like [Asparagus officinalis]	NA	64.4763	44.1288	2.57046	0.730492	2.85012	1.27761	13.5554	3.76079	0.00619299	0.578551	up	yes
MSTRG.13463	HHC013648	MSTRG.13463.1;rna-HHC013648.1	NA	NA	NA	NA		NA	100.862	51.2993	13.8321	10.4849	8.78531	10.4442	4.58874	2.1981	0.00621938	0.578551	up	yes
MSTRG.30193	HHC038443	rna-HHC038443.1	GO:0005634(nucleus);GO:0005737(cytoplasm);GO:0006457(protein folding)	NA	NA	NA	dnaJ homolog subfamily C member 8-like isoform X2 [Asparagus officinalis]	NA	20.8928	17.7927	13.501	3.8047	4.98864	2.70549	3.63857	1.86337	0.00624082	0.578551	up	yes
MSTRG.34907	HHC051125	rna-HHC051125.1	GO:0004751(ribose-5-phosphate isomerase activity);GO:0005737(cytoplasm);GO:0008219(cell death);GO:0009052(pentose-phosphate shunt, non-oxidative branch);GO:0010228(vegetative to reproductive phase transition of meristem)	00030(Pentose phosphate pathway);00710(Carbon fixation in photosynthetic organisms)	K01807	EC:5.3.1.6	probable ribose-5-phosphate isomerase 2 [Phoenix dactylifera]	NA	70.7569	67.3868	110.489	32.2985	25.1993	26.2296	2.73126	1.44956	0.0062516	0.578551	up	yes
MSTRG.17212	HHC018631	rna-HHC018631.1	GO:0005507(copper ion binding);GO:0016722(oxidoreductase activity, oxidizing metal ions)	00053(Ascorbate and aldarate metabolism)	K00423	EC:1.10.3.3	PREDICTED: L-ascorbate oxidase [Elaeis guineensis]	NA	37.9957	17.5889	1.46807	2.75158	2.62666	1.68786	6.93059	2.79298	0.00627075	0.578551	up	yes
MSTRG.8520	HHC047097	rna-HHC047097.1	GO:0000786(nucleosome);GO:0003677(DNA binding);GO:0005634(nucleus);GO:0006334(nucleosome assembly);GO:0031492(nucleosomal DNA binding)	NA	NA	NA	histone H3.2-like [Cucurbita pepo subsp. pepo]	NA	0.656861	1.63272	0.502851	0.240612	0.160341	0.116684	5.47433	2.45268	0.00629169	0.578551	up	yes
MSTRG.26662	HHC033045	rna-HHC033045.1;MSTRG.26662.1	GO:0005351(carbohydrate:proton symporter activity);GO:0005355(glucose transmembrane transporter activity);GO:0005887(integral component of plasma membrane);GO:0046323(glucose import)	NA	NA	NA	sugar transport protein MST3-like [Phoenix dactylifera]	NA	836.775	342.901	67.0002	67.1476	63.4358	55.153	5.53941	2.46973	0.00629417	0.578551	up	yes
MSTRG.25771	HHC031596	rna-HHC031596.1	GO:0005515(protein binding);GO:0009718(anthocyanin-containing compound biosynthetic process);GO:0042406(extrinsic component of endoplasmic reticulum membrane);GO:0045552(dihydrokaempferol 4-reductase activity);GO:0047890(flavanone 4-reductase activity);GO:0050662(coenzyme binding);GO:0055114(oxidation-reduction process)	00941(Flavonoid biosynthesis)	K13082	EC:1.1.1.219;EC:1.1.1.234	dihydroflavonol 4-reductase [Muscari armeniacum]	NA	61.8622	300.594	20.3594	18.914	15.2993	16.9587	6.22683	2.6385	0.00630424	0.578551	up	yes
MSTRG.16447		MSTRG.16447.1	NA	NA	NA	NA		NA	0.0662518	1.84403	0.907567	0.115702	0.0317396	0.051532	17.6144	4.13868	0.006335	0.579698	up	yes
MSTRG.10737		MSTRG.10737.1	NA	NA	NA	NA		NA	0.101052	0.141501	0.103369	0.42008	0.804757	0.92676	0.221194	-2.17661	0.00642394	0.586147	down	yes
MSTRG.28592	HHC036034	rna-HHC036034.1	GO:0000287(magnesium ion binding);GO:0004743(pyruvate kinase activity);GO:0005737(cytoplasm);GO:0005829(cytosol);GO:0006096(glycolytic process);GO:0016301(kinase activity);GO:0030955(potassium ion binding)	00010(Glycolysis / Gluconeogenesis);00620(Pyruvate metabolism);00230(Purine metabolism)	K00873	EC:2.7.1.40	pyruvate kinase, cytosolic isozyme [Asparagus officinalis]	NA	27.4513	19.0294	8.57391	4.97046	4.61995	4.17644	3.41191	1.77058	0.00644756	0.586617	up	yes
MSTRG.19751		MSTRG.19751.1	NA	NA	NA	NA		NA	10.0652	3.97849	0.55652	0.631292	0.447133	0.0001	17.0286	4.08989	0.00652218	0.591403	up	yes
MSTRG.11889	HHC011230	rna-HHC011230.5;rna-HHC011230.3;rna-HHC011230.7;rna-HHC011230.4;rna-HHC011230.8;rna-HHC011230.1;rna-HHC011230.9;rna-HHC011230.6;rna-HHC011230.2	GO:0000159(protein phosphatase type 2A complex);GO:0000166(nucleotide binding);GO:0000278(mitotic cell cycle);GO:0004722(protein serine/threonine phosphatase activity);GO:0005515(protein binding);GO:0005737(cytoplasm);GO:0005829(cytosol);GO:0006470(protein dephosphorylation);GO:0019888(protein phosphatase regulator activity);GO:0032502(developmental process);GO:0050790(regulation of catalytic act…	03015(mRNA surveillance pathway);03015(mRNA surveillance pathway)	K04354	NA	Protein phosphatase 2A [Macleaya cordata];hypothetical protein DVH24_020318 [Malus domestica];serine/threonine protein phosphatase 2A 55 kDa regulatory subunit B beta isoform isoform X5 [Citrus sinensis];serine/threonine protein phosphatase 2A 55 kDa regulatory subunit B beta isoform isoform X2 [Glycine max];Serine/threonine protein phosphatase 2A 55 kDa regulatory subunit B beta isoform isoform …	NA	15.2796	25.9119	26.9338	7.72276	5.66792	7.78292	2.81945	1.49542	0.00653741	0.591403	up	yes
MSTRG.26923	HHC033429	MSTRG.26923.2;rna-HHC033429.1	GO:0003333(amino acid transmembrane transport);GO:0015171(amino acid transmembrane transporter activity)	NA	NA	NA	PREDICTED: sodium-coupled neutral amino acid transporter 5 [Elaeis guineensis]	NA	8.95336	11.0778	12.5479	2.31479	2.34569	2.7462	3.42641	1.7767	0.00658074	0.592783	up	yes
MSTRG.20596	HHC023548	rna-HHC023548.1	GO:0000175(3'-5'-exoribonuclease activity);GO:0000288(nuclear-transcribed mRNA catabolic process, deadenylation-dependent decay);GO:0030014(CCR4-NOT complex)	03018(RNA degradation)	K12581	NA	probable CCR4-associated factor 1 homolog 11 [Asparagus officinalis]	NA	7.0703	3.20959	38.5433	1.83798	1.60592	1.28246	8.76984	3.13255	0.00659185	0.592783	up	yes
MSTRG.13439		MSTRG.13439.1	NA	NA	NA	NA		NA	24.7484	7.52845	1.19148	1.44575	1.60348	0.779831	7.32472	2.87277	0.00666284	0.592783	up	yes
MSTRG.30984	HHC039560	rna-HHC039560.1	GO:0005509(calcium ion binding);GO:0005886(plasma membrane);GO:0008150(biological_process)	04016(MAPK signaling pathway - plant);04070(Phosphatidylinositol signaling system);04626(Plant-pathogen interaction)	K02183	NA	putative calcium-binding protein [Ananas comosus]	NA	1.40948	2.15779	36.0714	2.03777	0.678592	1.2214	10.9675	3.45516	0.00668394	0.592783	up	yes
MSTRG.16971	HHC018302	MSTRG.16971.3;rna-HHC018302.2;MSTRG.16971.4;rna-HHC018302.1	GO:0004674(protein serine/threonine kinase activity);GO:0005524(ATP binding);GO:0005737(cytoplasm);GO:0005737(cytoplasm)	03008(Ribosome biogenesis in eukaryotes);03008(Ribosome biogenesis in eukaryotes)	K07178	EC:2.7.11.1	serine/threonine-protein kinase RIO1-like [Asparagus officinalis]	NA	13.4333	8.46916	15.1917	15.4566	4.79407	3.9364	3.00962	1.58958	0.00668484	0.592783	up	yes
MSTRG.5456	HHC042517	rna-HHC042517.1	NA	NA	NA	NA	uncharacterized protein A4U43_C02F20650 [Asparagus officinalis]	NA	510.418	464.775	65.9984	51.4419	57.3299	51.1914	5.03419	2.33176	0.0066892	0.592783	up	yes
MSTRG.7007	HHC044623	rna-HHC044623.1	GO:0016791(phosphatase activity)	00750(Vitamin B6 metabolism)	K13248	EC:3.1.3.74	inorganic pyrophosphatase 2 [Phoenix dactylifera]	NA	1.92031	4.09385	0.0001	0.0001	0.0001	0.0001	15035.9	13.8761	0.00669483	0.592783	up	yes
MSTRG.1474	HHC001880	rna-HHC001880.1	GO:0003333(amino acid transmembrane transport);GO:0015171(amino acid transmembrane transporter activity)	NA	NA	NA	PREDICTED: vacuolar amino acid transporter 1 [Musa acuminata subsp. malaccensis]	NA	1207.8	419.122	0.157686	0.0001	0.0001	1.35507	600.325	9.2296	0.00670201	0.592783	up	yes
MSTRG.26745	HHC033159	rna-HHC033159.1	GO:0002239(response to oomycetes);GO:0003674(molecular_function);GO:0009506(plasmodesma);GO:0009507(chloroplast);GO:0016021(integral component of membrane);GO:0055085(transmembrane transport)	NA	NA	NA	PREDICTED: uncharacterized protein LOC103994629 [Musa acuminata subsp. malaccensis]	NA	81.505	36.1335	26.7676	12.4432	12.4756	11.3516	3.29139	1.7187	0.00681229	0.600821	up	yes
MSTRG.32917	HHC050085	MSTRG.32917.1;rna-HHC050085.1	GO:0003700(DNA binding transcription factor activity);GO:0005516(calmodulin binding);GO:0005634(nucleus);GO:0006351(transcription, DNA-templated);GO:0006355(regulation of transcription, DNA-templated);GO:0010200(response to chitin);GO:0042742(defense response to bacterium);GO:0043565(sequence-specific DNA binding)	04016(MAPK signaling pathway - plant);04626(Plant-pathogen interaction)	K13425	NA	transcription factor WRKYJ2, partial [Narcissus hybrid cultivar]	NA	14.8117	12.0288	22.5768	6.08494	2.50258	4.58656	3.91459	1.96886	0.00683074	0.600821	up	yes
MSTRG.20300		MSTRG.20300.1	NA	NA	NA	NA		NA	0.0928121	0.0001	0.0001	0.0001	0.354934	0.562363	0.0507535	-4.30035	0.00689847	0.603449	down	yes
MSTRG.11782	HHC011078	rna-HHC011078.1	GO:0001887(selenium compound metabolic process);GO:0003962(cystathionine gamma-synthase activity);GO:0009086(methionine biosynthetic process);GO:0009507(chloroplast);GO:0009570(chloroplast stroma);GO:0030170(pyridoxal phosphate binding)	00920(Sulfur metabolism);00270(Cysteine and methionine metabolism);00450(Selenocompound metabolism)	K01739	EC:2.5.1.48	uncharacterized protein A4U43_C03F17520 [Asparagus officinalis]	NA	14.3254	6.34422	9.35239	2.79686	2.89253	2.22422	3.207	1.68123	0.00689863	0.603449	up	yes
MSTRG.2530	HHC003440	MSTRG.2530.1;rna-HHC003440.1;rna-HHC003440.2	NA	NA	NA	NA	hypothetical protein TanjilG_28990 [Lupinus angustifolius]	NA	2771.12	3134.03	1512.61	656.198	652.677	630.643	3.14573	1.65339	0.00694453	0.604124	up	yes
MSTRG.10010	HHC008469	MSTRG.10010.1	NA	NA	NA	NA		NA	0.0001	2.78018	0.0001	6.6589	0.0160145	0.0121603	167.513	7.38813	0.0069815	0.604124	up	yes
MSTRG.33598	HHC048000	rna-HHC048000.1;MSTRG.33598.2	GO:0005351(carbohydrate:proton symporter activity);GO:0005355(glucose transmembrane transporter activity);GO:0005887(integral component of plasma membrane);GO:0046323(glucose import)	NA	NA	NA	monosaccharide-sensing protein 2-like [Asparagus officinalis]	NA	56.1416	14.6364	6.81255	4.4485	4.92553	3.09634	5.11346	2.3543	0.00702575	0.604124	up	yes
MSTRG.3592		MSTRG.3592.1	NA	NA	NA	NA		NA	0.028749	4.12998	1.45371	0.0314897	0.0511699	0.0495438	28.0197	4.80837	0.00705476	0.604124	up	yes
MSTRG.6090	HHC043385	rna-HHC043385.1;rna-HHC043385.2	GO:0004096(catalase activity);GO:0005737(cytoplasm);GO:0020037(heme binding);GO:0042542(response to hydrogen peroxide);GO:0042744(hydrogen peroxide catabolic process);GO:0042744(hydrogen peroxide catabolic process)	00630(Glyoxylate and dicarboxylate metabolism);00380(Tryptophan metabolism);04016(MAPK signaling pathway - plant);04146(Peroxisome);04146(Peroxisome)	K03781	EC:1.11.1.6	PREDICTED: catalase isozyme A [Musa acuminata subsp. malaccensis]	NA	60.3265	30.1465	9.92071	7.24362	7.74981	5.59395	4.03325	2.01194	0.00707226	0.604124	up	yes
MSTRG.26903	HHC033401	MSTRG.26903.2;rna-HHC033401.1	GO:0005773(vacuole);GO:0005887(integral component of plasma membrane);GO:0009506(plasmodesma);GO:0009992(cellular water homeostasis);GO:0015250(water channel activity);GO:0015254(glycerol channel activity);GO:0034220(ion transmembrane transport)	NA	NA	NA	PREDICTED: aquaporin PIP1-1 isoform X1 [Juglans regia]	NA	2.40533	0.0001	0.69017	0.0001	0.0001	0.0001	7739.25	12.918	0.00707588	0.604124	up	yes
MSTRG.18404	HHC020586	rna-HHC020586.1	GO:0008889(glycerophosphodiester phosphodiesterase activity);GO:0030643(cellular phosphate ion homeostasis);GO:0046475(glycerophospholipid catabolic process)	00564(Glycerophospholipid metabolism)	K18696	EC:3.1.4.46	glycerophosphodiester phosphodiesterase GDPD1, chloroplastic-like [Asparagus officinalis]	NA	9.5047	23.9924	7.47873	1.70087	2.13811	2.71159	4.39993	2.13748	0.00708324	0.604124	up	yes
MSTRG.33807	HHC050316	rna-HHC050316.1	GO:0003674(molecular_function);GO:0005886(plasma membrane);GO:0008150(biological_process)	03060(Protein export)	K03116	NA	Coiled-coil domain-containing protein, putative [Ricinus communis]	NA	72.3592	74.9858	56.375	18.2768	17.152	21.8741	2.84421	1.50803	0.00710874	0.604124	up	yes
MSTRG.21456	HHC025030	MSTRG.21456.1;rna-HHC025030.1	GO:0005381(iron ion transmembrane transporter activity);GO:0005384(manganese ion transmembrane transporter activity);GO:0005886(plasma membrane);GO:0006828(manganese ion transport);GO:0006875(cellular metal ion homeostasis);GO:0009507(chloroplast);GO:0015086(cadmium ion transmembrane transporter activity);GO:0015103(inorganic anion transmembrane transporter activity);GO:0015691(cadmium ion transp…	NA	NA	NA	metal transporter Nramp3-like isoform X1 [Asparagus officinalis]	NA	128.505	88.3789	13.0314	10.3169	9.40829	13.0971	5.33721	2.41609	0.00711113	0.604124	up	yes
MSTRG.30338	HHC038655	rna-HHC038655.1	GO:0004497(monooxygenase activity);GO:0055114(oxidation-reduction process)	00380(Tryptophan metabolism)	K11816	EC:1.14.13.168	indole-3-pyruvate monooxygenase YUCCA2-like [Phoenix dactylifera]	NA	7.33687	2.21283	0.821489	0.176019	0.169263	0.236023	13.0121	3.70178	0.00711536	0.604124	up	yes
MSTRG.24012	HHC028911	rna-HHC028911.1;MSTRG.24012.2	GO:0004842(ubiquitin-protein transferase activity);GO:0031463(Cul3-RING ubiquitin ligase complex)	NA	NA	NA	F-box/kelch-repeat protein SKIP20-like [Dendrobium catenatum]	NA	88.9935	65.6871	161.302	50.2519	33.7802	33.6741	2.71469	1.44079	0.00712795	0.604124	up	yes
MSTRG.16775	HHC018045	rna-HHC018045.1	NA	NA	NA	NA	PREDICTED: protein PHLOEM PROTEIN 2-LIKE A1-like [Prunus mume]	NA	789.935	712.84	97.3331	80.2946	84.1505	82.8165	5.03214	2.33117	0.00715942	0.604124	up	yes
MSTRG.30053	HHC038191	rna-HHC038191.1	GO:0004857(enzyme inhibitor activity)	00040(Pentose and glucuronate interconversions)	K01051	EC:3.1.1.11	uncharacterized protein A4U43_C03F15560 [Asparagus officinalis]	NA	92.1468	123.095	14.2133	11.055	12.8506	11.3714	4.9647	2.31171	0.00724319	0.604124	up	yes
MSTRG.32080	HHC048386	rna-HHC048386.1;MSTRG.32080.2	GO:0003677(DNA binding);GO:0003700(DNA binding transcription factor activity);GO:0005515(protein binding);GO:0005634(nucleus);GO:0006351(transcription, DNA-templated);GO:0006355(regulation of transcription, DNA-templated);GO:0009733(response to auxin);GO:0009734(auxin-activated signaling pathway);GO:0010150(leaf senescence);GO:0042802(identical protein binding);GO:0045892(negative regulation of t…	04075(Plant hormone signal transduction)	K14486	NA	auxin response factor 7-like [Asparagus officinalis]	NA	3.95801	1.03131	3.5025	3.26217	1.08641	0.632648	3.41874	1.77346	0.00725154	0.604124	up	yes
MSTRG.14615	HHC015216	rna-HHC015216.2;rna-HHC015216.1	GO:0003674(molecular_function);GO:0005739(mitochondrion);GO:0008150(biological_process);GO:0008150(biological_process)	NA	NA	NA	LOW QUALITY PROTEIN: pentatricopeptide repeat-containing protein At1g01970-like [Asparagus officinalis]	NA	13.9645	0.966402	4.05575	0.877587	0.605	0.0001	16.414	4.03686	0.00725332	0.604124	up	yes
MSTRG.2835	HHC003939	MSTRG.2835.1;rna-HHC003939.1	GO:0003723(RNA binding);GO:0003729(mRNA binding);GO:0003743(translation initiation factor activity);GO:0005737(cytoplasm);GO:0005852(eukaryotic translation initiation factor 3 complex);GO:0005886(plasma membrane);GO:0006413(translational initiation)	03013(RNA transport)	K03248	NA	eukaryotic translation initiation factor 3 subunit G-like [Phoenix dactylifera]	NA	5.81003	0.590829	15.1313	2.98565	33.6349	30.1015	0.192337	-2.37829	0.00726102	0.604124	down	yes
gene-HHC009892	HHC009892	rna-HHC009892.1	NA	NA	NA	NA	protein MAINTENANCE OF MERISTEMS-like [Papaver somniferum]	NA	0.0001	0.0646602	0.10604	0.333238	1.0735	0.946577	0.124757	-3.00281	0.00727203	0.604124	down	yes
MSTRG.5227		MSTRG.5227.1	NA	NA	NA	NA		NA	1.79671	1.65525	1.41925	0.570631	0.278676	0.213882	5.52406	2.46573	0.00727928	0.604124	up	yes
MSTRG.23432	HHC028153	rna-HHC028153.1	GO:0034219(carbohydrate transmembrane transport)	NA	NA	NA	phosphoenolpyruvate/phosphate translocator 2, chloroplastic-like [Ananas comosus]	NA	5.04327	40.7395	45.7037	4.25943	3.82508	4.53062	5.72938	2.51838	0.00729243	0.604124	up	yes
MSTRG.21652	HHC025267;HHC025266	rna-HHC025267.1;rna-HHC025266.1;MSTRG.21652.1;MSTRG.21652.4;MSTRG.21652.5;MSTRG.21652.3	GO:0009620(response to fungus);GO:0009620(response to fungus)	NA	NA	NA	ethylene response factor [Ophiopogon japonicus]	NA	110.878	47.7899	41.1649	16.5442	16.5553	15.962	3.3271	1.73427	0.00731622	0.604124	up	yes
MSTRG.2871	HHC004000	rna-HHC004000.1;rna-HHC004000.2	GO:0005515(protein binding);GO:0005737(cytoplasm);GO:0005829(cytosol);GO:0005886(plasma membrane);GO:0006520(cellular amino acid metabolic process);GO:0006979(response to oxidative stress);GO:0006982(response to lipid hydroperoxide);GO:0008615(pyridoxine biosynthetic process);GO:0009651(response to salt stress);GO:0010224(response to UV-B);GO:0010335(response to non-ionic osmotic stress);GO:00125…	00750(Vitamin B6 metabolism);00750(Vitamin B6 metabolism)	K06215	EC:4.3.3.6	hypothetical protein B296_00046320 [Ensete ventricosum];PREDICTED: probable pyridoxal 5'-phosphate synthase subunit PDX1 [Lupinus angustifolius]	NA	1457.65	503.961	470.873	235.772	199.127	190.738	3.42203	1.77485	0.00735509	0.604124	up	yes
MSTRG.15548		MSTRG.15548.1	NA	NA	NA	NA		NA	0.0765998	0.0885974	0.168981	0.191618	0.472859	1.06722	0.170705	-2.55042	0.00735569	0.604124	down	yes
MSTRG.35172	HHC051915	MSTRG.35172.1;rna-HHC051915.1	GO:0004672(protein kinase activity);GO:0005515(protein binding);GO:0005524(ATP binding);GO:0005886(plasma membrane);GO:0006468(protein phosphorylation);GO:0009506(plasmodesma);GO:0016021(integral component of membrane);GO:0016301(kinase activity);GO:0031348(negative regulation of defense response);GO:0033612(receptor serine/threonine kinase binding);GO:0042742(defense response to bacterium);GO:00…	NA	NA	NA	PREDICTED: probably inactive leucine-rich repeat receptor-like protein kinase At5g48380 [Elaeis guineensis]	NA	46.5451	10.2213	7.7169	12.9891	6.06355	3.92039	3.87985	1.956	0.00736044	0.604124	up	yes
gene-HHC046739	HHC046739	rna-HHC046739.1	GO:0009813(flavonoid biosynthetic process);GO:0043231(intracellular membrane-bounded organelle);GO:0052696(flavonoid glucuronidation);GO:0080043(quercetin 3-O-glucosyltransferase activity);GO:0080044(quercetin 7-O-glucosyltransferase activity)	NA	NA	NA	PREDICTED: hydroquinone glucosyltransferase-like [Elaeis guineensis]	NA	1.08224	0.0001	0.0001	0.913023	0.0001	0.0001	4988.66	12.2844	0.00737439	0.604124	up	yes
MSTRG.27314	HHC034183	rna-HHC034183.1;MSTRG.27314.1	GO:0004364(glutathione transferase activity);GO:0005737(cytoplasm);GO:0006749(glutathione metabolic process)	00480(Glutathione metabolism)	K00799	EC:2.5.1.18	glutathione S-transferase 3-like [Asparagus officinalis]	NA	137.231	94.9308	65.9169	33.8031	30.2372	29.8722	2.76065	1.46501	0.00738198	0.604124	up	yes
MSTRG.20324	HHC023171	MSTRG.20324.2;rna-HHC023171.1	GO:0004672(protein kinase activity);GO:0004674(protein serine/threonine kinase activity);GO:0004714(transmembrane receptor protein tyrosine kinase activity);GO:0005496(steroid binding);GO:0005524(ATP binding);GO:0005886(plasma membrane);GO:0016021(integral component of membrane)	04075(Plant hormone signal transduction)	K13415	EC:2.7.10.1;EC:2.7.11.1	brassinosteroid LRR receptor kinase BRL1-like [Asparagus officinalis]	NA	4.87263	2.50929	1.18843	2.80132	0.418866	0.938708	4.18823	2.06634	0.00746429	0.60438	up	yes
MSTRG.25788	HHC031632	MSTRG.25788.1;MSTRG.25788.2;rna-HHC031632.1	GO:0008150(biological_process)	03030(DNA replication);03420(Nucleotide excision repair);03430(Mismatch repair);03440(Homologous recombination)	K07466	NA	uncharacterized protein At4g28440 [Amborella trichopoda]	NA	101.55	46.6324	25.0715	60.6629	20.3122	22.548	2.72884	1.44829	0.00749459	0.60438	up	yes
MSTRG.21725	HHC025360;HHC025356	MSTRG.21725.5;rna-HHC025356.1;MSTRG.21725.4;MSTRG.21725.3;MSTRG.21725.6;rna-HHC025360.1;MSTRG.21725.1	GO:0009813(flavonoid biosynthetic process);GO:0043231(intracellular membrane-bounded organelle);GO:0052696(flavonoid glucuronidation);GO:0080043(quercetin 3-O-glucosyltransferase activity);GO:0080044(quercetin 7-O-glucosyltransferase activity);GO:0080044(quercetin 7-O-glucosyltransferase activity)	NA	NA	NA	crocetin glucosyltransferase, chloroplastic-like [Phoenix dactylifera]	NA	126.907	61.1631	165.663	55.1106	34.1721	41.1486	2.71402	1.44043	0.00749746	0.60438	up	yes
MSTRG.25881		MSTRG.25881.1	NA	NA	NA	NA		NA	8.24762	4.55456	0.371401	0.731337	0.512439	0.32312	8.32073	3.05671	0.0074977	0.60438	up	yes
MSTRG.5761	HHC042913	MSTRG.5761.1;rna-HHC042913.2;MSTRG.5761.3;MSTRG.5761.4;rna-HHC042913.1	GO:0000786(nucleosome);GO:0003677(DNA binding);GO:0005634(nucleus);GO:0006334(nucleosome assembly);GO:0009414(response to water deprivation);GO:0031492(nucleosomal DNA binding);GO:0031492(nucleosomal DNA binding)	NA	NA	NA	PREDICTED: histone H1-like [Erythranthe guttata]	NA	665.275	588.319	309.572	157.506	147.103	139.987	2.99675	1.5834	0.00749975	0.60438	up	yes
MSTRG.1373	HHC001755	rna-HHC001755.1	GO:0005634(nucleus);GO:0005886(plasma membrane);GO:0016757(transferase activity, transferring glycosyl groups);GO:0046524(sucrose-phosphate synthase activity)	00500(Starch and sucrose metabolism)	K00696	EC:2.4.1.14	probable sucrose-phosphate synthase 4 isoform X1 [Asparagus officinalis]	NA	32.1968	36.9941	2.43072	3.55017	3.29091	3.21684	5.77556	2.52996	0.00752343	0.60438	up	yes
MSTRG.16358		MSTRG.16358.1	NA	NA	NA	NA		NA	1.385	2.55282	2.40495	4.84168	11.7353	8.84359	0.271746	-1.87967	0.00755425	0.60438	down	yes
MSTRG.19899	HHC022603	rna-HHC022603.1	GO:0003674(molecular_function);GO:0005634(nucleus);GO:0008150(biological_process)	00230(Purine metabolism);00240(Pyrimidine metabolism);03020(RNA polymerase)	K03006	EC:2.7.7.6	protein SRC2-like [Asparagus officinalis]	NA	11.8903	8.70719	19.4042	5.01894	3.4315	4.57963	2.80988	1.49051	0.00756649	0.60438	up	yes
MSTRG.8665	HHC047324	rna-HHC047324.1	GO:0004722(protein serine/threonine phosphatase activity);GO:0005634(nucleus);GO:0006470(protein dephosphorylation);GO:0009536(plastid);GO:0009611(response to wounding);GO:0009620(response to fungus);GO:0009738(abscisic acid-activated signaling pathway);GO:0046872(metal ion binding);GO:0050832(defense response to fungus)	NA	NA	NA	probable protein phosphatase 2C 74 [Asparagus officinalis]	NA	5.97817	4.33639	0.0001	0.0001	0.0001	0.0001	25786.9	14.6544	0.00756802	0.60438	up	yes
MSTRG.6846	HHC044415	rna-HHC044415.1	GO:0005524(ATP binding);GO:0005739(mitochondrion);GO:0006400(tRNA modification);GO:0009507(chloroplast);GO:0009536(plastid);GO:0009691(cytokinin biosynthetic process);GO:0009824(AMP dimethylallyltransferase activity);GO:0052381(tRNA dimethylallyltransferase activity);GO:0052622(ATP dimethylallyltransferase activity);GO:0052623(ADP dimethylallyltransferase activity);GO:0080117(secondary growth)	00908(Zeatin biosynthesis)	K10760	EC:2.5.1.27;EC:2.5.1.112	adenylate isopentenyltransferase-like [Dendrobium catenatum]	NA	25.3565	8.41281	0.474844	0.870838	0.962067	0.439881	12.5236	3.64658	0.00758808	0.60438	up	yes
MSTRG.11680	HHC010943	rna-HHC010943.1;rna-HHC010943.2;rna-HHC010943.3	GO:0005634(nucleus);GO:0005829(cytosol);GO:0005829(cytosol)	NA	NA	NA	hypothetical protein AXF42_Ash015361 [Apostasia shenzhenica]	NA	16.317	16.0957	10.4307	11.0906	6.46551	4.76866	2.40045	1.2633	0.00760373	0.60438	up	yes
MSTRG.12702	HHC012351	rna-HHC012351.1;rna-HHC012351.2	GO:0000786(nucleosome);GO:0003677(DNA binding);GO:0005634(nucleus);GO:0006334(nucleosome assembly);GO:0006334(nucleosome assembly)	NA	NA	NA	Histone H1.2 [Apostasia shenzhenica];PREDICTED: histone H1-like [Elaeis guineensis]	NA	77.61	75.8323	21.8149	12.9545	12.3104	13.854	3.59672	1.84668	0.00763738	0.60438	up	yes
MSTRG.8795	HHC006377	rna-HHC006377.1;rna-HHC006377.2	GO:0000788(nuclear nucleosome);GO:0003677(DNA binding);GO:0006334(nucleosome assembly);GO:0006334(nucleosome assembly)	NA	NA	NA	histone H2B-like protein [Cinnamomum micranthum f. kanehirae]	NA	18.6111	13.5968	8.26499	4.11762	3.98796	3.8103	2.859	1.51551	0.00766686	0.60438	up	yes
MSTRG.22032	HHC025828	rna-HHC025828.1	GO:0004805(trehalose-phosphatase activity);GO:0005634(nucleus);GO:0005730(nucleolus);GO:0005737(cytoplasm);GO:0005992(trehalose biosynthetic process);GO:0046686(response to cadmium ion)	00500(Starch and sucrose metabolism)	K01087	EC:3.1.3.12	PREDICTED: probable trehalose-phosphate phosphatase 6 [Elaeis guineensis]	NA	4.98524	6.54405	2.59271	0.961519	1.07698	1.06205	3.52579	1.81794	0.00767603	0.60438	up	yes
MSTRG.6247		MSTRG.6247.1;MSTRG.6247.2	NA	NA	NA	NA		NA	106.421	89.3676	71.6113	29.8224	27.2669	27.205	2.72822	1.44796	0.00768084	0.60438	up	yes
MSTRG.1695	HHC002188;HHC002192;HHC002189	rna-HHC002188.1;rna-HHC002192.1;MSTRG.1695.4;MSTRG.1695.1;rna-HHC002189.1	GO:0003674(molecular_function);GO:0005634(nucleus);GO:0009739(response to gibberellin);GO:0009911(positive regulation of flower development);GO:0010228(vegetative to reproductive phase transition of meristem);GO:0010228(vegetative to reproductive phase transition of meristem)	03015(mRNA surveillance pathway);03015(mRNA surveillance pathway)	K14416	NA	PREDICTED: flowering-promoting factor 1-like protein 3 [Daucus carota subsp. sativus]	NA	90.9784	99.7728	21.7071	8.1056	9.32007	14.5751	4.61524	2.20641	0.00768965	0.60438	up	yes
MSTRG.481	HHC000539	MSTRG.481.1	NA	NA	NA	NA		NA	0.0001	0.0001	2.24511	5.91869	0.0001	0.0001	20410	14.317	0.00774575	0.607286	up	yes
MSTRG.1451	HHC001855	rna-HHC001855.2;rna-HHC001855.1;MSTRG.1451.2;MSTRG.1451.1	GO:0005576(extracellular region);GO:0016020(membrane);GO:0016021(integral component of membrane);GO:0046872(metal ion binding);GO:0055114(oxidation-reduction process);GO:0055114(oxidation-reduction process)	NA	NA	NA	PREDICTED: cytochrome b561 and DOMON domain-containing protein At3g07570-like [Musa acuminata subsp. malaccensis]	NA	48.6133	1.96283	2.90073	1.58857	1.07266	1.02072	13.1523	3.71725	0.0078013	0.608108	up	yes
MSTRG.12981	HHC012912	MSTRG.12981.1	NA	NA	NA	NA		NA	2.71561	2.34791	1.16799	0.539589	0.483903	0.214553	4.84718	2.27715	0.00782538	0.608108	up	yes
MSTRG.34861	HHC051970	MSTRG.34861.2;rna-HHC051970.1	GO:0005634(nucleus);GO:0016491(oxidoreductase activity);GO:0055114(oxidation-reduction process)	NA	NA	NA	uncharacterized protein A4U43_C05F26140 [Asparagus officinalis]	NA	12.7192	4.40373	0.243584	0.0837605	0.244571	0.161152	21.5052	4.42661	0.00783335	0.608108	up	yes
MSTRG.13325	HHC013464	rna-HHC013464.1	GO:0009570(chloroplast stroma);GO:0044183(protein binding involved in protein folding);GO:0061077(chaperone-mediated protein folding)	NA	NA	NA	PREDICTED: chaperonin-like RbcX protein 2, chloroplastic [Elaeis guineensis]	NA	76.1637	58.1923	26.3974	11.9388	12.7577	12.9462	3.35927	1.74815	0.00786008	0.608108	up	yes
MSTRG.34012	HHC050261	rna-HHC050261.1	GO:0005634(nucleus);GO:0008270(zinc ion binding);GO:0016021(integral component of membrane);GO:0016567(protein ubiquitination);GO:0043161(proteasome-mediated ubiquitin-dependent protein catabolic process);GO:0046872(metal ion binding);GO:0061630(ubiquitin protein ligase activity)	NA	NA	NA	uncharacterized protein A4U43_C10F15570 [Asparagus officinalis]	NA	3.07544	1.41328	0.637596	0.290011	0.242528	0.183981	6.34961	2.66667	0.00787908	0.608108	up	yes
MSTRG.16190	HHC017231	rna-HHC017231.2;MSTRG.16190.4;rna-HHC017231.1;rna-HHC017231.3	GO:0003674(molecular_function);GO:0005576(extracellular region);GO:0008150(biological_process);GO:0008150(biological_process)	NA	NA	NA	uncharacterized protein LOC109725769 [Ananas comosus]	NA	87.1064	155.585	75.434	134.025	48.9981	49.4154	2.29719	1.19987	0.00788401	0.608108	up	yes
MSTRG.11191	HHC010273	MSTRG.11191.1;MSTRG.11191.4;MSTRG.11191.2;MSTRG.11191.3	NA	NA	NA	NA		NA	2.01528	4.95962	2.37337	1.87484	6.41639	10.8039	0.325869	-1.61764	0.0078903	0.608108	down	yes
MSTRG.11551	HHC010740	rna-HHC010740.1	GO:0000209(protein polyubiquitination);GO:0005886(plasma membrane);GO:0009789(positive regulation of abscisic acid-activated signaling pathway);GO:0043161(proteasome-mediated ubiquitin-dependent protein catabolic process);GO:0061630(ubiquitin protein ligase activity)	NA	NA	NA	E3 ubiquitin-protein ligase RHA2A-like [Phoenix dactylifera]	NA	47.3181	63.865	32.1557	23.0153	16.8888	16.7081	2.47574	1.30786	0.00793954	0.610422	up	yes
MSTRG.3594		MSTRG.3594.1	NA	NA	NA	NA		NA	0.00781434	1.76097	0.76331	0.0001	0.0001	0.00472425	262.444	8.03587	0.00800558	0.613546	up	yes
MSTRG.12986		MSTRG.12986.1	NA	NA	NA	NA		NA	0.0001	0.392719	0.77345	0.0001	0.0001	0.0001	2915.92	11.5097	0.00801882	0.613546	up	yes
MSTRG.33539	HHC047879	rna-HHC047879.1	GO:0005215(transporter activity);GO:0005524(ATP binding);GO:0005886(plasma membrane);GO:0006810(transport);GO:0016887(ATPase activity)	NA	NA	NA	ABC transporter F family member 4 [Phalaenopsis equestris]	NA	38.9735	15.316	8.52018	15.3619	4.51965	6.45829	3.5604	1.83204	0.00815118	0.622013	up	yes
MSTRG.17932	HHC019792	rna-HHC019792.1	GO:0005783(endoplasmic reticulum);GO:0005886(plasma membrane);GO:0009926(auxin polar transport);GO:0010252(auxin homeostasis);GO:0010329(auxin efflux transmembrane transporter activity)	NA	NA	NA	auxin efflux carrier component 5 [Phoenix dactylifera]	NA	72.6545	21.4395	1.25559	1.91972	2.15909	2.62968	10.156	3.34426	0.00819058	0.622013	up	yes
MSTRG.23603	HHC028382	MSTRG.23603.1;MSTRG.23603.2	NA	NA	NA	NA		NA	20.5421	41.4206	126.994	1.17084	5.98362	6.01235	7.92464	2.98634	0.00820838	0.622013	up	yes
MSTRG.6970	HHC044563	rna-HHC044563.1	GO:0009813(flavonoid biosynthetic process);GO:0043231(intracellular membrane-bounded organelle);GO:0052696(flavonoid glucuronidation);GO:0080043(quercetin 3-O-glucosyltransferase activity);GO:0080044(quercetin 7-O-glucosyltransferase activity)	NA	NA	NA	LOW QUALITY PROTEIN: hydroquinone glucosyltransferase-like [Phoenix dactylifera]	NA	294.642	101.242	20.3533	30.7835	22.0018	23.1865	4.9462	2.30632	0.00821191	0.622013	up	yes
MSTRG.24751	HHC029914	rna-HHC029914.1	GO:0005634(nucleus);GO:0010427(abscisic acid binding)	NA	NA	NA	lachrymatory-factor synthase [Asparagus officinalis]	NA	4.27033	4.94198	2.83958	0.955441	1.21798	0.847946	3.14806	1.65446	0.00823306	0.622013	up	yes
MSTRG.19072	HHC021465	rna-HHC021465.1	GO:0003674(molecular_function);GO:0005739(mitochondrion);GO:0008150(biological_process)	NA	NA	NA	uncharacterized protein LOC109837742 [Asparagus officinalis]	NA	3.05535	8.79587	1.3802	1.06402	1.0065	0.597799	4.45537	2.15554	0.00825495	0.622013	up	yes
MSTRG.4488	HHC040914;HHC040913	rna-HHC040914.2;MSTRG.4488.2;MSTRG.4488.3;rna-HHC040913.1;rna-HHC040914.3;rna-HHC040914.1	GO:0004587(ornithine-oxo-acid transaminase activity);GO:0005737(cytoplasm);GO:0010121(arginine catabolic process to proline via ornithine);GO:0019544(arginine catabolic process to glutamate);GO:0030170(pyridoxal phosphate binding);GO:0042802(identical protein binding);GO:0042802(identical protein binding)	00330(Arginine and proline metabolism);00330(Arginine and proline metabolism)	K00819	EC:2.6.1.13	ornithine aminotransferase, mitochondrial [Asparagus officinalis];PREDICTED: ornithine aminotransferase, mitochondrial isoform X1 [Elaeis guineensis]	NA	72.147	63.9322	68.8296	39.1014	25.6723	28.0743	2.27001	1.1827	0.00827793	0.622013	up	yes
MSTRG.21388		MSTRG.21388.1	NA	NA	NA	NA		NA	19.4261	18.6195	1.38177	1.93808	1.41541	1.68188	6.67768	2.73935	0.00830581	0.622013	up	yes
MSTRG.2808	HHC003898	MSTRG.2808.1;rna-HHC003898.1	GO:0009570(chloroplast stroma);GO:0010333(terpene synthase activity);GO:0033383(geranyl diphosphate metabolic process);GO:0043693(monoterpene biosynthetic process)	00902(Monoterpenoid biosynthesis)	K07385	EC:4.2.3.108	Myrcene synthase, chloroplastic, partial [Ananas comosus]	NA	5.98142	9.47754	2.54526	0.288497	0.590728	0.0001	15.4806	3.95239	0.00836089	0.622013	up	yes
MSTRG.13462	HHC013648	MSTRG.13462.3;MSTRG.13462.1;MSTRG.13462.2	NA	NA	NA	NA		NA	607.788	238.231	68.9678	41.7279	47.0501	48.6544	4.99827	2.32143	0.00836363	0.622013	up	yes
MSTRG.8185	HHC046584	rna-HHC046584.1	GO:0003674(molecular_function);GO:0005634(nucleus);GO:0005829(cytosol);GO:0019005(SCF ubiquitin ligase complex);GO:0030162(regulation of proteolysis);GO:0031625(ubiquitin protein ligase binding);GO:0043161(proteasome-mediated ubiquitin-dependent protein catabolic process);GO:0080037(negative regulation of cytokinin-activated signaling pathway);GO:2000762(regulation of phenylpropanoid metabolic pr…	NA	NA	NA	F-box/kelch-repeat protein At1g80440-like [Phoenix dactylifera]	NA	17.7416	4.96799	4.78528	2.81728	1.46211	2.17655	4.1653	2.05842	0.00836766	0.622013	up	yes
MSTRG.17173	HHC018564	rna-HHC018564.1;rna-HHC018564.2	GO:0005515(protein binding);GO:0005634(nucleus);GO:0009740(gibberellic acid mediated signaling pathway);GO:0009845(seed germination);GO:0009939(positive regulation of gibberellic acid mediated signaling pathway);GO:0010162(seed dormancy process);GO:0016567(protein ubiquitination);GO:0019005(SCF ubiquitin ligase complex);GO:0019005(SCF ubiquitin ligase complex)	04075(Plant hormone signal transduction);04075(Plant hormone signal transduction)	K14495	NA	F-box protein GID2-like isoform X1 [Phoenix dactylifera]	NA	75.7251	60.1922	51.6412	28.43	21.8112	20.2112	2.56992	1.36173	0.00838688	0.622013	up	yes
MSTRG.8690	HHC006219	rna-HHC006219.1	GO:0005215(transporter activity);GO:0005886(plasma membrane);GO:0006807(nitrogen compound metabolic process);GO:0006857(oligopeptide transport);GO:0009506(plasmodesma);GO:0015031(protein transport);GO:0016020(membrane);GO:0016021(integral component of membrane);GO:0022857(transmembrane transporter activity);GO:0042937(tripeptide transmembrane transporter activity);GO:0042938(dipeptide transport);…	NA	NA	NA	protein NRT1/ PTR FAMILY 8.1-like [Ananas comosus]	NA	105.377	55.147	86.178	18.0612	21.3083	22.4936	3.02227	1.59563	0.00839222	0.622013	up	yes
MSTRG.18041	HHC019966	MSTRG.18041.3;rna-HHC019966.3;rna-HHC019966.2;rna-HHC019966.1	GO:0005887(integral component of plasma membrane);GO:0015179(L-amino acid transmembrane transporter activity);GO:0015297(antiporter activity);GO:0015297(antiporter activity)	NA	NA	NA	uncharacterized protein A4U43_C10F7130 [Asparagus officinalis]	NA	17.7304	14.3603	5.95508	8.39621	4.16843	4.92647	2.55319	1.3523	0.00840372	0.622013	up	yes
MSTRG.18951	HHC021290	rna-HHC021290.1;rna-HHC021290.2	GO:0005739(mitochondrion);GO:0006464(cellular protein modification process);GO:0008113(peptide-methionine (S)-S-oxide reductase activity);GO:0009416(response to light stimulus);GO:0009507(chloroplast);GO:0009570(chloroplast stroma);GO:0009735(response to cytokinin);GO:0009941(chloroplast envelope);GO:0010114(response to red light);GO:0010218(response to far red light);GO:0034599(cellular response…	NA	NA	NA	PREDICTED: peptide methionine sulfoxide reductase A1-like [Elaeis guineensis]	NA	70.7841	38.9489	36.8388	15.1401	13.7431	14.3303	2.88015	1.52615	0.00848454	0.62573	up	yes
MSTRG.24964	HHC030212	rna-HHC030212.1	GO:0000103(sulfate assimilation);GO:0004604(phosphoadenylyl-sulfate reductase (thioredoxin) activity);GO:0009507(chloroplast);GO:0009973(adenylyl-sulfate reductase activity);GO:0016671(oxidoreductase activity, acting on a sulfur group of donors, disulfide as acceptor);GO:0019344(cysteine biosynthetic process);GO:0019419(sulfate reduction);GO:0033741(adenylyl-sulfate reductase (glutathione) activi…	00920(Sulfur metabolism)	K05907	EC:1.8.4.9	5'-adenylylsulfate reductase [Polygonatum pubescens]	NA	14.429	85.221	155.201	15.7656	13.7661	14.8665	4.72567	2.24052	0.00849336	0.62573	up	yes
MSTRG.23912	HHC028776	rna-HHC028776.1	GO:0003674(molecular_function);GO:0005634(nucleus);GO:0008150(biological_process)	NA	NA	NA	uncharacterized protein A4U43_C10F8480 [Asparagus officinalis]	NA	184.104	53.1041	1.48417	3.38207	4.20805	5.05147	13.0717	3.70837	0.00856521	0.62699	up	yes
MSTRG.18605	HHC020827	rna-HHC020827.1	NA	NA	NA	NA	uncharacterized protein LOC109837462 [Asparagus officinalis]	NA	29.3304	24.7409	29.4416	14.2389	9.56571	11.396	2.33167	1.22137	0.00857808	0.62699	up	yes
MSTRG.1722	HHC002240	rna-HHC002240.1	GO:0003333(amino acid transmembrane transport);GO:0015171(amino acid transmembrane transporter activity)	NA	NA	NA	sodium-coupled neutral amino acid transporter 2-like [Asparagus officinalis]	NA	9.347	2.47986	2.36471	1.24578	0.722744	0.678996	5.5065	2.46113	0.00858108	0.62699	up	yes
MSTRG.35678		MSTRG.35678.1	NA	NA	NA	NA		NA	10.7068	10.4527	4.1014	2.46612	1.93551	1.20858	4.40938	2.14058	0.00858944	0.62699	up	yes
MSTRG.4648	HHC041242	rna-HHC041242.1;MSTRG.4648.2	GO:0003677(DNA binding);GO:0003682(chromatin binding);GO:0004386(helicase activity);GO:0005524(ATP binding);GO:0005634(nucleus);GO:0006333(chromatin assembly or disassembly);GO:0009506(plasmodesma)	NA	NA	NA	protein CHROMATIN REMODELING 5-like isoform X5 [Asparagus officinalis]	NA	88.7621	16.8454	19.3616	112.584	14.6053	17.1853	3.73621	1.90158	0.00866291	0.630903	up	yes
MSTRG.36083		MSTRG.36083.1	NA	NA	NA	NA		NA	17.9678	16.1041	10.5628	3.25731	3.22716	3.74752	3.43328	1.77959	0.0086966	0.631907	up	yes
MSTRG.9915		MSTRG.9915.1	NA	NA	NA	NA		NA	0.671594	0.782846	0.136344	1.93449	5.88542	4.65085	0.167292	-2.57956	0.00872685	0.632657	down	yes
MSTRG.8142	HHC046520	rna-HHC046520.2;rna-HHC046520.1	GO:0003674(molecular_function);GO:0005622(intracellular);GO:0005623(cell);GO:0005634(nucleus);GO:0009902(chloroplast relocation);GO:0031022(nuclear migration along microfilament);GO:0031022(nuclear migration along microfilament)	NA	NA	NA	LOW QUALITY PROTEIN: protein PLASTID MOVEMENT IMPAIRED 1-RELATED 1-like [Asparagus officinalis];uncharacterized protein A4U43_C01F22840 [Asparagus officinalis]	NA	3.04532	2.22895	2.04694	1.38615	0.510339	1.00104	2.88059	1.52637	0.00886188	0.635495	up	yes
MSTRG.1047	HHC001297	rna-HHC001297.1	GO:0004842(ubiquitin-protein transferase activity);GO:0016567(protein ubiquitination)	NA	NA	NA	U-box domain-containing protein 5-like [Asparagus officinalis]	NA	21.4956	2.42709	0.384282	0.71047	0.457046	0.686002	10.9433	3.45197	0.00887698	0.635495	up	yes
MSTRG.21349	HHC024893	rna-HHC024893.1	GO:0003677(DNA binding);GO:0003700(DNA binding transcription factor activity);GO:0005515(protein binding);GO:0005634(nucleus);GO:0006351(transcription, DNA-templated);GO:0007275(multicellular organism development);GO:0009651(response to salt stress);GO:0009737(response to abscisic acid);GO:0010089(xylem development);GO:0010150(leaf senescence);GO:0016032(viral process);GO:0045892(negative regulat…	NA	NA	NA	NAC domain-containing protein 83-like [Asparagus officinalis]	NA	45.8282	23.5897	9.33635	8.07892	6.26326	6.74803	3.33684	1.73848	0.00888996	0.635495	up	yes
gene-HHC034555	HHC034555	rna-HHC034555.1	GO:0008150(biological_process);GO:0016021(integral component of membrane)	NA	NA	NA	uncharacterized protein LOC109848389 [Asparagus officinalis]	NA	7.00993	1.81564	0.945188	1.22605	0.487367	0.550666	5.29694	2.40516	0.00892402	0.635495	up	yes
MSTRG.15575	HHC016438	MSTRG.15575.3;MSTRG.15575.2;rna-HHC016438.1	GO:0005886(plasma membrane);GO:0008150(biological_process);GO:0016021(integral component of membrane)	NA	NA	NA	PREDICTED: DUF21 domain-containing protein At2g14520-like isoform X5 [Musa acuminata subsp. malaccensis]	NA	6.0077	2.51353	0.153825	0.252542	0.298811	0.236906	8.33237	3.05873	0.00892745	0.635495	up	yes
MSTRG.19017	HHC021388	rna-HHC021388.1	GO:0005737(cytoplasm);GO:0030001(metal ion transport);GO:0046914(transition metal ion binding);GO:0046916(cellular transition metal ion homeostasis)	NA	NA	NA	heavy metal-associated isoprenylated plant protein 44-like [Ananas comosus]	NA	43.3673	34.2221	7.7651	10.4847	7.76249	6.26457	3.41623	1.77241	0.00894617	0.635495	up	yes
MSTRG.580		MSTRG.580.1	NA	NA	NA	NA		NA	0.0001	0.818493	1.40371	0.0001	0.0001	0.0001	5556	12.4398	0.00895562	0.635495	up	yes
MSTRG.34419	HHC050728	MSTRG.34419.1;rna-HHC050728.1	GO:0000028(ribosomal small subunit assembly);GO:0000462(maturation of SSU-rRNA from tricistronic rRNA transcript (SSU-rRNA, 5.8S rRNA, LSU-rRNA));GO:0030515(snoRNA binding);GO:0032040(small-subunit processome);GO:0034388(Pwp2p-containing subcomplex of 90S preribosome)	03008(Ribosome biogenesis in eukaryotes)	K14558	NA	LOW QUALITY PROTEIN: periodic tryptophan protein 2 homolog [Asparagus officinalis]	NA	18.7617	3.15554	4.86799	3.65519	1.41759	0.473714	8.04747	3.00854	0.00895601	0.635495	up	yes
MSTRG.13752	HHC014040	rna-HHC014040.1	NA	NA	NA	NA	PREDICTED: protein E6-like [Musa acuminata subsp. malaccensis]	NA	5.18474	16.3276	8.77875	0.223279	0.680107	0.888053	9.72936	3.28235	0.00897437	0.635495	up	yes
MSTRG.4411	HHC040801;HHC040800	MSTRG.4411.3;rna-HHC040801.1;MSTRG.4411.1;MSTRG.4411.4;rna-HHC040800.1	GO:0003333(amino acid transmembrane transport);GO:0015171(amino acid transmembrane transporter activity);GO:0015171(amino acid transmembrane transporter activity)	NA	NA	NA	uncharacterized protein A4U43_C02F4320 [Asparagus officinalis];probable sodium-coupled neutral amino acid transporter 6 [Dendrobium catenatum]	NA	12.3011	48.4257	65.4097	8.0127	9.18443	7.99797	3.90368	1.96483	0.00899436	0.635495	up	yes
MSTRG.29543		MSTRG.29543.1	NA	NA	NA	NA		NA	1.6472	0.776917	0.941294	0.905306	0.30569	0.16873	4.50098	2.17024	0.00900482	0.635495	up	yes
MSTRG.20041	HHC022811;HHC022804;HHC022809;HHC022795	rna-HHC022811.1;MSTRG.20041.2;MSTRG.20041.3;rna-HHC022809.1;MSTRG.20041.1	GO:0000788(nuclear nucleosome);GO:0003677(DNA binding);GO:0006334(nucleosome assembly);GO:0006334(nucleosome assembly)	NA	NA	NA	uncharacterized protein LOC112517691 [Cynara cardunculus var. scolymus];unnamed protein product [Brassica rapa]	NA	95.7687	79.6906	73.321	38.0505	28.1604	30.4942	2.44508	1.28988	0.00900617	0.635495	up	yes
MSTRG.15353	HHC016154	rna-HHC016154.1	GO:0005634(nucleus)	NA	NA	NA	protein FANTASTIC FOUR 3 [Asparagus officinalis]	NA	143.021	121.466	42.5954	26.838	22.505	30.047	3.17704	1.66768	0.00905944	0.635905	up	yes
MSTRG.35376	HHC050476	MSTRG.35376.1	NA	NA	NA	NA		NA	0.543931	1.00065	0.0001	0.0001	0.0001	0.0001	3861.96	11.9151	0.00906176	0.635905	up	yes
MSTRG.1008	HHC001238	rna-HHC001238.1	NA	NA	NA	NA	uncharacterized protein A4U43_C06F5930 [Asparagus officinalis]	NA	2.59888	0.0001	0.0001	4.54306	0.0001	0.0001	17855.3	14.1241	0.00907205	0.635905	up	yes
MSTRG.33498	HHC052932	rna-HHC052932.1	GO:0003674(molecular_function);GO:0005634(nucleus);GO:0009733(response to auxin)	04075(Plant hormone signal transduction)	K14488	NA	PREDICTED: auxin-responsive protein SAUR32-like [Elaeis guineensis]	NA	665.543	173.664	101.577	50.4738	50.361	58.8649	4.53765	2.18195	0.00916258	0.640836	up	yes
MSTRG.16874	HHC018187;HHC018188	MSTRG.16874.2;rna-HHC018187.1;MSTRG.16874.1;rna-HHC018188.1	GO:0004497(monooxygenase activity);GO:0005506(iron ion binding);GO:0009507(chloroplast);GO:0016705(oxidoreductase activity, acting on paired donors, with incorporation or reduction of molecular oxygen);GO:0019825(oxygen binding);GO:0020037(heme binding);GO:0055114(oxidation-reduction process);GO:0055114(oxidation-reduction process)	00073(Cutin, suberine and wax biosynthesis);00073(Cutin, suberine and wax biosynthesis)	K13407;K20769	EC:1.14.-.-	PREDICTED: cytochrome P450 94A1 [Elaeis guineensis]	NA	35.8125	25.4711	27.2093	13.13	12.9413	6.43376	2.62252	1.39095	0.00918801	0.641182	up	yes
MSTRG.24894	HHC030113	MSTRG.24894.1;rna-HHC030113.1;MSTRG.24894.2	GO:0005634(nucleus);GO:0005829(cytosol);GO:0005886(plasma membrane);GO:0006950(response to stress);GO:0016787(hydrolase activity)	NA	NA	NA	PREDICTED: universal stress protein PHOS34-like isoform X1 [Musa acuminata subsp. malaccensis]	NA	58.952	61.7067	43.9238	24.3899	21.6924	17.604	2.40445	1.26571	0.00923074	0.641182	up	yes
MSTRG.33288		MSTRG.33288.1	NA	NA	NA	NA		NA	11.4711	22.4531	13.8339	2.17255	57.7377	45.5394	0.241732	-2.04852	0.00924237	0.641182	down	yes
MSTRG.14383	HHC014917	rna-HHC014917.1;rna-HHC014917.2	GO:0003674(molecular_function);GO:0008150(biological_process);GO:0009507(chloroplast);GO:0009507(chloroplast)	NA	NA	NA	PREDICTED: uncharacterized protein LOC105044746 [Elaeis guineensis];uncharacterized protein LOC103717503 [Phoenix dactylifera]	NA	23.5606	25.2854	2.76225	2.57526	2.07181	3.47448	4.88466	2.28826	0.0092644	0.641182	up	yes
MSTRG.32332	HHC051211	rna-HHC051211.1	GO:0003677(DNA binding);GO:0003700(DNA binding transcription factor activity);GO:0005515(protein binding);GO:0005634(nucleus);GO:0006351(transcription, DNA-templated);GO:0009873(ethylene-activated signaling pathway);GO:0043565(sequence-specific DNA binding);GO:0045892(negative regulation of transcription, DNA-templated)	NA	NA	NA	AP2/ERF and B3 domain-containing transcription repressor TEM1, partial [Mucuna pruriens]	NA	13.4465	4.66319	14.1651	1.77853	1.75818	2.47474	4.02244	2.00807	0.00927859	0.641182	up	yes
MSTRG.30359	HHC038682	MSTRG.30359.1;rna-HHC038682.1;MSTRG.30359.3	GO:0005506(iron ion binding);GO:0006457(protein folding);GO:0009055(electron transfer activity);GO:0009507(chloroplast)	NA	NA	NA	PREDICTED: uncharacterized protein LOC105047489 [Elaeis guineensis]	NA	278.075	171.663	56.6852	35.9538	34.8984	38.4703	3.69624	1.88606	0.00928869	0.641182	up	yes
MSTRG.16787	HHC018064	rna-HHC018064.1;MSTRG.16787.2	GO:0005634(nucleus);GO:0009625(response to insect);GO:0030246(carbohydrate binding);GO:0043394(proteoglycan binding)	NA	NA	NA	PREDICTED: protein PHLOEM PROTEIN 2-LIKE A1-like [Daucus carota subsp. sativus]	NA	87.4054	145.663	10.3274	13.196	13.2215	11.9403	5.09883	2.35017	0.00932959	0.642254	up	yes
MSTRG.9655	HHC007685	rna-HHC007685.3;rna-HHC007685.1;rna-HHC007685.2	GO:0000103(sulfate assimilation);GO:0006457(protein folding);GO:0009507(chloroplast);GO:0015035(protein disulfide oxidoreductase activity);GO:0016671(oxidoreductase activity, acting on a sulfur group of donors, disulfide as acceptor);GO:0034599(cellular response to oxidative stress);GO:0045454(cell redox homeostasis);GO:0055114(oxidation-reduction process);GO:0055114(oxidation-reduction process)	NA	NA	NA	uncharacterized protein LOC109838051 [Asparagus officinalis];uncharacterized protein A4U43_C04F29130 [Asparagus officinalis]	NA	699.572	830.095	981.628	263.108	261.793	246.025	2.73169	1.44979	0.00934468	0.642254	up	yes
MSTRG.21782	HHC025427	rna-HHC025427.1	GO:0005509(calcium ion binding)	04626(Plant-pathogen interaction)	K13448	NA	probable calcium-binding protein CML18 [Phoenix dactylifera]	NA	15.1333	11.4422	37.1727	3.85531	4.55284	4.2684	3.83186	1.93804	0.00943353	0.643653	up	yes
MSTRG.31868	HHC051639	MSTRG.31868.1;MSTRG.31868.3;MSTRG.31868.2;rna-HHC051639.1	GO:0005515(protein binding);GO:0005634(nucleus);GO:0005829(cytosol);GO:0006970(response to osmotic stress);GO:0016567(protein ubiquitination);GO:0031396(regulation of protein ubiquitination);GO:0042802(identical protein binding);GO:0071472(cellular response to salt stress)	NA	NA	NA	PREDICTED: BTB/POZ and MATH domain-containing protein 3 [Elaeis guineensis]	NA	22.6109	16.3431	15.8529	24.1126	7.78932	7.59234	2.56538	1.35917	0.00944405	0.643653	up	yes
MSTRG.9719		MSTRG.9719.1	NA	NA	NA	NA		NA	0.0001	1.65071	0.0001	1.24986	0.0001	0.0001	7251.94	12.8242	0.00948339	0.643653	up	yes
MSTRG.15756	HHC016665	rna-HHC016665.1	GO:0004222(metalloendopeptidase activity);GO:0005576(extracellular region);GO:0005886(plasma membrane);GO:0006508(proteolysis);GO:0008270(zinc ion binding);GO:0031012(extracellular matrix);GO:0031225(anchored component of membrane)	NA	NA	NA	metalloendoproteinase 1-MMP-like [Asparagus officinalis]	NA	16.1052	8.10686	2.5474	0.980509	1.20968	0.885779	6.61908	2.72663	0.00951498	0.643653	up	yes
MSTRG.30084	HHC038255;HHC038249	MSTRG.30084.1;rna-HHC038249.1;rna-HHC038255.1	GO:0005737(cytoplasm);GO:0030001(metal ion transport);GO:0046914(transition metal ion binding);GO:0046916(cellular transition metal ion homeostasis);GO:0046916(cellular transition metal ion homeostasis)	NA	NA	NA	hypothetical protein B296_00018381 [Ensete ventricosum];uncharacterized protein A4U43_C04F11050 [Asparagus officinalis]	NA	60.2235	77.4576	2.40592	3.95941	6.28753	1.75499	8.95531	3.16274	0.00953522	0.643653	up	yes
MSTRG.24640	HHC029744	rna-HHC029744.1	GO:0003674(molecular_function);GO:0009507(chloroplast);GO:0009534(chloroplast thylakoid);GO:0009535(chloroplast thylakoid membrane);GO:0009538(photosystem I reaction center);GO:0009579(thylakoid);GO:0009735(response to cytokinin);GO:0010287(plastoglobule);GO:0015979(photosynthesis);GO:0016020(membrane);GO:0016021(integral component of membrane)	00195(Photosynthesis)	K02695	NA	photosystem I reaction center subunit VI-1, chloroplastic [Asparagus officinalis]	NA	338.311	395.297	456.311	103.558	114.133	113.886	2.83633	1.50403	0.00955	0.643653	up	yes
MSTRG.7339	HHC044984	MSTRG.7339.2;rna-HHC044984.1	GO:0005739(mitochondrion);GO:0005747(mitochondrial respiratory chain complex I);GO:0008137(NADH dehydrogenase (ubiquinone) activity);GO:0046872(metal ion binding);GO:0051539(4 iron, 4 sulfur cluster binding);GO:0055114(oxidation-reduction process)	00190(Oxidative phosphorylation)	K03941	EC:1.6.5.3;EC:1.6.99.3	hypothetical protein EUGRSUZ_I00724 [Eucalyptus grandis]	NA	27.8865	19.1376	22.5635	11.5323	7.39148	8.21107	2.59957	1.37828	0.0095504	0.643653	up	yes
MSTRG.12278	HHC011702	rna-HHC011702.1	NA	NA	NA	NA		NA	43.1509	62.2365	44.2272	18.781	16.655	16.3234	2.55312	1.35226	0.00959285	0.643653	up	yes
MSTRG.26892	HHC033377	rna-HHC033377.1;MSTRG.26892.2	NA	NA	NA	NA	uncharacterized protein LOC109820692 [Asparagus officinalis]	NA	50.8418	81.4149	16.6686	13.714	12.3888	12.3776	3.28346	1.71522	0.00962388	0.643653	up	yes
MSTRG.12628		MSTRG.12628.1	NA	NA	NA	NA		NA	0.0001	0.345097	0.123481	1.88912	4.44146	5.2221	0.121994	-3.03512	0.00963342	0.643653	down	yes
MSTRG.32190	HHC053589	MSTRG.32190.1	NA	NA	NA	NA		NA	3.24079	0.0001	0.0001	2.73134	0.0001	0.0001	14930.8	13.866	0.009644	0.643653	up	yes
MSTRG.23274	HHC027942	MSTRG.23274.1;rna-HHC027942.1	GO:0005634(nucleus);GO:0005737(cytoplasm);GO:0005739(mitochondrion);GO:0016787(hydrolase activity);GO:0016818(hydrolase activity, acting on acid anhydrides, in phosphorus-containing anhydrides);GO:0046872(metal ion binding)	NA	NA	NA	nudix hydrolase 12, mitochondrial-like isoform X2 [Asparagus officinalis]	NA	61.1889	23.4436	5.14215	3.9309	4.31243	3.32517	6.13448	2.61694	0.00964836	0.643653	up	yes
MSTRG.16136	HHC017168	rna-HHC017168.1	GO:0005773(vacuole);GO:0009705(plant-type vacuole membrane);GO:0015098(molybdate ion transmembrane transporter activity);GO:0015116(sulfate transmembrane transporter activity);GO:0015689(molybdate ion transport);GO:0090414(molybdate ion export from vacuole)	NA	NA	NA	PREDICTED: molybdate transporter 2 [Nelumbo nucifera]	NA	28.2462	29.1419	4.49242	3.46419	3.51179	4.17877	4.24838	2.08691	0.00966399	0.643653	up	yes
MSTRG.10894		MSTRG.10894.1	NA	NA	NA	NA		NA	0.053664	0.142785	0.237201	0.962883	2.09977	1.8476	0.176894	-2.49904	0.00967887	0.643653	down	yes
MSTRG.7967	HHC046204	MSTRG.7967.1	NA	NA	NA	NA		NA	155.775	157.503	229.134	48.8703	61.6535	42.7352	2.83212	1.50188	0.00970219	0.643653	up	yes
MSTRG.5191		MSTRG.5191.1	NA	NA	NA	NA		NA	12.3588	6.46083	1.70131	1.02992	0.707015	0.913633	6.64885	2.73311	0.00971995	0.643653	up	yes
MSTRG.18118	HHC020171	MSTRG.18118.1;rna-HHC020171.1	GO:0005887(integral component of plasma membrane);GO:0006857(oligopeptide transport);GO:0015031(protein transport);GO:0016020(membrane);GO:0016021(integral component of membrane);GO:0035673(oligopeptide transmembrane transporter activity);GO:0055085(transmembrane transport)	NA	NA	NA	PREDICTED: oligopeptide transporter 7-like [Elaeis guineensis]	NA	9.7073	56.6496	34.9999	7.29066	5.34402	8.78227	3.84558	1.9432	0.00974285	0.643653	up	yes
MSTRG.21762	HHC025402;HHC025401;HHC025399	MSTRG.21762.5;MSTRG.21762.8;MSTRG.21762.1;MSTRG.21762.7;MSTRG.21762.2;rna-HHC025399.1;rna-HHC025401.1;rna-HHC025402.1;MSTRG.21762.4	GO:0047036(codeinone reductase (NADPH) activity);GO:0047036(codeinone reductase (NADPH) activity)	00053(Ascorbate and aldarate metabolism)	K19642	EC:1.1.1.365	non-functional NADPH-dependent codeinone reductase 2-like [Phoenix dactylifera];Aldo/keto reductase [Macleaya cordata]	NA	81.9718	24.0519	8.03082	1.3927	4.58465	3.28233	7.33745	2.87528	0.00974945	0.643653	up	yes
MSTRG.27018		MSTRG.27018.1	NA	NA	NA	NA		NA	4.99285	2.1086	0.392207	1.08963	0.110191	0.325327	9.8541	3.30072	0.00975016	0.643653	up	yes
MSTRG.18702	HHC020956	MSTRG.18702.1;MSTRG.18702.2;rna-HHC020956.1	GO:0002237(response to molecule of bacterial origin);GO:0005515(protein binding);GO:0005775(vacuolar lumen);GO:0005886(plasma membrane);GO:0006486(protein glycosylation);GO:0009877(nodulation);GO:1900150(regulation of defense response to fungus);GO:1902290(positive regulation of defense response to oomycetes)	NA	NA	NA	serine/threonine receptor-like kinase NFP [Ananas comosus]	NA	473.45	169.712	76.7037	42.1994	45.9252	46.0242	4.14394	2.051	0.00992235	0.649482	up	yes
MSTRG.23250	HHC027906	MSTRG.23250.1;rna-HHC027906.1	GO:0003746(translation elongation factor activity);GO:0005829(cytosol);GO:0005853(eukaryotic translation elongation factor 1 complex);GO:0005886(plasma membrane);GO:0006414(translational elongation)	NA	NA	NA	uncharacterized protein A4U43_C08F10930 [Asparagus officinalis]	NA	14.0181	8.31306	10.9723	2.95804	2.85736	1.80475	3.88896	1.95938	0.00992823	0.649482	up	yes
MSTRG.11207	HHC010287	rna-HHC010287.1	GO:0004372(glycine hydroxymethyltransferase activity);GO:0005634(nucleus);GO:0005737(cytoplasm);GO:0006544(glycine metabolic process);GO:0006563(L-serine metabolic process);GO:0019264(glycine biosynthetic process from serine);GO:0030170(pyridoxal phosphate binding);GO:0035999(tetrahydrofolate interconversion);GO:0044030(regulation of DNA methylation);GO:0046500(S-adenosylmethionine metabolic proc…	00630(Glyoxylate and dicarboxylate metabolism);00260(Glycine, serine and threonine metabolism);00460(Cyanoamino acid metabolism);00670(One carbon pool by folate)	K00600	EC:2.1.2.1	serine hydroxymethyltransferase 7 isoform X1 [Asparagus officinalis]	NA	16.379	44.2456	68.5786	7.81347	9.11258	9.63259	3.65472	1.86976	0.00992984	0.649482	up	yes
MSTRG.33238	HHC052190	MSTRG.33238.3;rna-HHC052190.1;MSTRG.33238.2	GO:0004605(phosphatidate cytidylyltransferase activity);GO:0008654(phospholipid biosynthetic process);GO:0009507(chloroplast);GO:0010189(vitamin E biosynthetic process);GO:0010276(phytol kinase activity);GO:0016020(membrane);GO:0016021(integral component of membrane);GO:0016301(kinase activity);GO:0016310(phosphorylation);GO:0031969(chloroplast membrane)	NA	NA	NA	probable phytol kinase, chloroplastic, partial [Asparagus officinalis]	NA	106.75	82.5785	55.6986	35.6579	27.8697	29.0697	2.46477	1.30145	0.00996284	0.649482	up	yes
MSTRG.1599	HHC002042	rna-HHC002042.1	GO:0005739(mitochondrion);GO:0008150(biological_process)	NA	NA	NA	uncharacterized protein LOC109842844 [Asparagus officinalis]	NA	57.4225	26.4641	7.15676	5.66845	6.80309	4.73562	4.19076	2.06721	0.0099755	0.649482	up	yes
MSTRG.8391	HHC046924	MSTRG.8391.1;rna-HHC046924.1	NA	NA	NA	NA	uncharacterized protein A4U43_UnF2390 [Asparagus officinalis]	NA	42.6591	6.55447	145.232	5.49764	5.03576	9.21923	7.01309	2.81005	0.00998116	0.649482	up	yes
MSTRG.29479	HHC037273	MSTRG.29479.1	NA	NA	NA	NA		NA	0.0001	0.0001	0.0001	3.62515	29.7519	3.06232	0.0552421	-4.17809	0.00998165	0.649482	down	yes
MSTRG.31290	HHC039964	rna-HHC039964.1	GO:0003735(structural constituent of ribosome);GO:0006412(translation)	NA	NA	NA	PREDICTED: mitochondrial phosphate carrier protein 3, mitochondrial isoform X1 [Vitis vinifera]	NA	22.7122	4.42933	1.35221	1.60299	1.02446	1.07004	7.18471	2.84493	0.0100545	0.651443	up	yes
MSTRG.31489		MSTRG.31489.1	NA	NA	NA	NA		NA	4.3887	35.1993	4.53757	2.69084	1.46848	1.76391	7.24176	2.85634	0.0100588	0.651443	up	yes
MSTRG.28202	HHC035503	rna-HHC035503.1	GO:0000502(proteasome complex);GO:0004175(endopeptidase activity);GO:0004298(threonine-type endopeptidase activity);GO:0005515(protein binding);GO:0005634(nucleus);GO:0005737(cytoplasm);GO:0005773(vacuole);GO:0005774(vacuolar membrane);GO:0005819(spindle);GO:0005829(cytosol);GO:0005839(proteasome core complex);GO:0006511(ubiquitin-dependent protein catabolic process);GO:0008233(peptidase activity…	03050(Proteasome)	K02731	EC:3.4.25.1	proteasome subunit alpha type-7-like isoform X3 [Durio zibethinus]	NA	102.344	49.3661	44.5952	10.6579	14.2652	15.6996	3.45344	1.78803	0.0100927	0.651443	up	yes
MSTRG.14707	HHC015362	MSTRG.14707.2;rna-HHC015362.1	GO:0000723(telomere maintenance);GO:0000784(nuclear chromosome, telomeric region);GO:0003684(damaged DNA binding);GO:0003690(double-stranded DNA binding);GO:0004003(ATP-dependent DNA helicase activity);GO:0006303(double-strand break repair via nonhomologous end joining);GO:0006310(DNA recombination);GO:0032508(DNA duplex unwinding);GO:0042162(telomeric DNA binding);GO:0043564(Ku70:Ku80 complex);G…	03450(Non-homologous end-joining)	K10885	NA	ATP-dependent DNA helicase 2 subunit KU80 isoform X1 [Asparagus officinalis]	NA	0.0001	0.611666	0.0001	0.50582	0.0001	0.0001	2794.21	11.4482	0.0100939	0.651443	up	yes
MSTRG.23755	HHC028583;HHC028580	MSTRG.23755.3;MSTRG.23755.1;MSTRG.23755.2	NA	NA	NA	NA		NA	3.68736	2.32068	0.017266	0.0001	0.0267852	0.0205567	63.6371	5.9918	0.0101313	0.652532	up	yes
MSTRG.10180	HHC008722;HHC008724	rna-HHC008722.1;MSTRG.10180.2;rna-HHC008724.2;rna-HHC008724.1	GO:0005507(copper ion binding);GO:0006878(cellular copper ion homeostasis)	NA	NA	NA	metallothionein-like protein, partial [Hyacinthus orientalis];metallothionein-like protein type 2 isoform X2 [Phoenix dactylifera];hypothetical protein TanjilG_28990 [Lupinus angustifolius]	NA	1513.44	380.17	312.531	145.907	150.189	144.405	3.99202	1.99712	0.0101948	0.655292	up	yes
MSTRG.12663		MSTRG.12663.1	NA	NA	NA	NA		NA	0.706154	1.1435	1.32807	6.14619	13.9355	6.18001	0.231759	-2.1093	0.0102443	0.657147	down	yes
MSTRG.29212	HHC036854	rna-HHC036854.1	GO:0003674(molecular_function);GO:0005575(cellular_component);GO:0071281(cellular response to iron ion);GO:0071369(cellular response to ethylene stimulus);GO:0071732(cellular response to nitric oxide)	NA	NA	NA	uncharacterized protein LOC109822894 [Asparagus officinalis]	NA	71.2518	19.2277	6.1991	6.18813	5.05709	5.7414	4.76301	2.25187	0.0102794	0.658067	up	yes
MSTRG.4713	HHC041356	rna-HHC041356.1	GO:0005739(mitochondrion);GO:0006400(tRNA modification);GO:0052381(tRNA dimethylallyltransferase activity)	00908(Zeatin biosynthesis)	K10760	EC:2.5.1.27;EC:2.5.1.112	adenylate isopentenyltransferase 5, chloroplastic-like [Asparagus officinalis]	NA	4.68511	7.14849	0.615646	0.758649	0.341587	0.604722	6.97864	2.80295	0.0103032	0.658265	up	yes
MSTRG.27965	HHC035196	rna-HHC035196.1	GO:0003674(molecular_function);GO:0008150(biological_process);GO:0009507(chloroplast);GO:0016021(integral component of membrane)	NA	NA	NA	hypothetical protein [Arabidopsis thaliana]	NA	9.47749	7.88287	0.0001	0.397291	0.0001	0.196314	45.2049	5.49841	0.0103541	0.660042	up	yes
MSTRG.35420	HHC052349	rna-HHC052349.1	GO:0004722(protein serine/threonine phosphatase activity);GO:0006470(protein dephosphorylation);GO:0009507(chloroplast);GO:0046872(metal ion binding)	NA	NA	NA	probable protein phosphatase 2C 74 [Asparagus officinalis]	NA	1.48576	0.679116	0.0001	0.0001	0.0001	0.0001	5412.69	12.4021	0.0103726	0.660042	up	yes
MSTRG.16199		MSTRG.16199.1	NA	NA	NA	NA		NA	5.83426	3.40305	6.83532	1.48439	1.08749	1.49868	3.39441	1.76316	0.010431	0.661964	up	yes
MSTRG.2773	HHC003851	MSTRG.2773.2;MSTRG.2773.4;rna-HHC003851.1;MSTRG.2773.3	GO:0003876(AMP deaminase activity);GO:0005515(protein binding);GO:0005524(ATP binding);GO:0005634(nucleus);GO:0005783(endoplasmic reticulum);GO:0005829(cytosol);GO:0009168(purine ribonucleoside monophosphate biosynthetic process);GO:0009737(response to abscisic acid);GO:0009793(embryo development ending in seed dormancy);GO:0031307(integral component of mitochondrial outer membrane);GO:0032264(IM…	00230(Purine metabolism)	K01490	EC:3.5.4.6	uncharacterized protein A4U43_C07F4260 [Asparagus officinalis]	NA	311.028	355.038	51.5247	48.8539	53.6728	42.0441	4.00371	2.00134	0.0104589	0.661964	up	yes
MSTRG.19448	HHC021957	rna-HHC021957.1	GO:0003674(molecular_function);GO:0005774(vacuolar membrane);GO:0008150(biological_process)	NA	NA	NA	PREDICTED: uncharacterized protein LOC103999035 [Musa acuminata subsp. malaccensis]	NA	15.4643	15.3222	7.03534	4.00577	3.20275	3.7246	3.01901	1.59408	0.0104807	0.661964	up	yes
MSTRG.7454	HHC045169	rna-HHC045169.1;rna-HHC045169.2	GO:0002237(response to molecule of bacterial origin);GO:0003674(molecular_function);GO:0009507(chloroplast);GO:0010015(root morphogenesis);GO:0016020(membrane);GO:0016021(integral component of membrane);GO:0016021(integral component of membrane)	NA	NA	NA	transmembrane protein adipocyte-associated 1 homolog [Asparagus officinalis]	NA	29.5189	18.4243	19.4932	11.7874	7.30193	9.46529	2.36246	1.24029	0.0104968	0.661964	up	yes
MSTRG.13636	HHC013882	MSTRG.13636.1	NA	NA	NA	NA		NA	7.80622	1.30179	1.42283	0.0001	0.147746	0.0001	35.6145	5.15439	0.0105392	0.661964	up	yes
MSTRG.27137	HHC033897	rna-HHC033897.1	GO:0003735(structural constituent of ribosome);GO:0005840(ribosome);GO:0006412(translation);GO:0009507(chloroplast);GO:0009570(chloroplast stroma);GO:0009941(chloroplast envelope);GO:0016020(membrane);GO:0019843(rRNA binding)	03010(Ribosome)	K02906	NA	hypothetical protein B296_00025743 [Ensete ventricosum]	NA	0.4368	0.330851	1.08392	0.173087	0.0936795	0.121337	4.70814	2.23516	0.0105405	0.661964	up	yes
MSTRG.29079	HHC036706;HHC036704	MSTRG.29079.1;rna-HHC036704.1;MSTRG.29079.2;rna-HHC036706.1	GO:0005634(nucleus);GO:0008150(biological_process);GO:0048046(apoplast);GO:0005737(cytoplasm);GO:0010090(trichome morphogenesis)	NA	NA	NA	uncharacterized protein LOC109822931 [Asparagus officinalis]	NA	394.313	134.651	69.393	45.6558	40.57	46.8394	3.68389	1.88123	0.0105487	0.661964	up	yes
MSTRG.35590	HHC050959	rna-HHC050959.1;MSTRG.35590.1	GO:0003333(amino acid transmembrane transport);GO:0005886(plasma membrane);GO:0015171(amino acid transmembrane transporter activity)	NA	NA	NA	lysine histidine transporter 2-like [Asparagus officinalis]	NA	23.8523	6.74936	2.84537	2.57347	2.04149	1.57812	4.97574	2.31491	0.0105904	0.662999	up	yes
MSTRG.12300	HHC011742	rna-HHC011742.1	GO:0009705(plant-type vacuole membrane);GO:0015140(malate transmembrane transporter activity)	NA	NA	NA	aluminum-activated malate transporter 9-like [Phoenix dactylifera]	NA	142.534	27.6436	0.0001	1.87273	0.594744	1.43042	42.4782	5.40865	0.010607	0.662999	up	yes
MSTRG.17092	HHC018458	rna-HHC018458.1	GO:0005739(mitochondrion)	NA	NA	NA	PREDICTED: uncharacterized protein LOC105050093 [Elaeis guineensis]	NA	62.0942	53.3294	69.7378	28.3822	22.9803	21.7312	2.38802	1.25581	0.0107109	0.665555	up	yes
gene-HHC044876	HHC044876	rna-HHC044876.1	GO:0005507(copper ion binding);GO:0005829(cytosol);GO:0009507(chloroplast);GO:0015446(ATPase-coupled arsenite transmembrane transporter activity);GO:0015700(arsenite transport);GO:0016756(glutathione gamma-glutamylcysteinyltransferase activity);GO:0042344(indole glucosinolate catabolic process);GO:0042742(defense response to bacterium);GO:0046685(response to arsenic-containing substance);GO:00466…	NA	NA	NA	phytochelatin synthases PCS1 [Iris sp. ser. Hexagonae]	NA	0.78734	0.578573	0.157033	0.138995	0.0001	0.0679382	12.2133	3.61038	0.0107201	0.665555	up	yes
MSTRG.6169	HHC043488	rna-HHC043488.1	NA	NA	NA	NA	protein BPS1, chloroplastic-like [Phoenix dactylifera]	NA	125.657	116.581	1109.98	65.6069	72.0767	54.9224	5.58204	2.48079	0.010722	0.665555	up	yes
MSTRG.26949	HHC033475	MSTRG.26949.1	NA	NA	NA	NA		NA	0.0001	0.0001	0.0001	0.276098	0.99505	0.901774	0.0728582	-3.77876	0.0107558	0.665555	down	yes
MSTRG.25442	HHC030990	rna-HHC030990.1	GO:0003674(molecular_function);GO:0005739(mitochondrion);GO:0006979(response to oxidative stress);GO:0016021(integral component of membrane)	00270(Cysteine and methionine metabolism)	K00558	EC:2.1.1.37	PREDICTED: uncharacterized protein LOC105041884 [Elaeis guineensis]	NA	16.5402	6.88258	5.25703	2.04166	1.38206	2.1118	4.3965	2.13636	0.0107624	0.665555	up	yes
MSTRG.11250		MSTRG.11250.1	NA	NA	NA	NA		NA	37.8467	9.80522	8.93894	7.0587	3.13501	4.39872	4.22431	2.07871	0.0107736	0.665555	up	yes
MSTRG.28869		MSTRG.28869.1	NA	NA	NA	NA		NA	30.4711	3.78058	4.96566	2.86496	1.74595	1.79746	5.9381	2.57	0.010892	0.671106	up	yes
MSTRG.30412	HHC038768	rna-HHC038768.1	GO:0005739(mitochondrion)	NA	NA	NA	PREDICTED: pentatricopeptide repeat-containing protein At2g27800, mitochondrial [Elaeis guineensis]	NA	3.21322	1.51383	1.20103	3.35532	0.256257	0.452637	6.54781	2.71101	0.0109058	0.671106	up	yes
MSTRG.12070		MSTRG.12070.1	NA	NA	NA	NA		NA	10.4268	9.46932	11.646	24.6109	35.7287	38.6234	0.377615	-1.40501	0.0109927	0.674793	down	yes
MSTRG.4	HHC000010	rna-HHC000010.1;rna-HHC000010.2	GO:0009705(plant-type vacuole membrane);GO:0015140(malate transmembrane transporter activity);GO:0015140(malate transmembrane transporter activity)	NA	NA	NA	Aluminum-activated malate transporter 9 [Ananas comosus]	NA	590.133	295.184	13.608	35.5755	34.4262	32.6345	6.96757	2.80065	0.0110195	0.674793	up	yes
MSTRG.24038	HHC028957	rna-HHC028957.1;MSTRG.24038.1	NA	NA	NA	NA		NA	106.894	144.425	20.6331	18.4923	22.4587	14.4102	3.93888	1.97779	0.0110428	0.674793	up	yes
MSTRG.16771	HHC018042	rna-HHC018042.1;MSTRG.16771.1	NA	NA	NA	NA	phloem protein 2-A1 [Artemisia annua]	NA	796.265	1012.26	168.907	128.949	126.544	145.98	3.86458	1.95031	0.0110507	0.674793	up	yes
MSTRG.6519	HHC043957	rna-HHC043957.1;rna-HHC043957.2	NA	NA	NA	NA	hypothetical protein GW17_00029885 [Ensete ventricosum]	NA	311.319	282.2	168.234	83.1885	77.5568	84.8913	2.60065	1.37887	0.011131	0.677783	up	yes
MSTRG.6787		MSTRG.6787.1	NA	NA	NA	NA		NA	43.2071	15.1562	0.0001	0.395896	0.520161	0.0001	56.471	5.81944	0.0111441	0.677783	up	yes
MSTRG.4861	HHC041594	rna-HHC041594.2;rna-HHC041594.1	GO:0003735(structural constituent of ribosome);GO:0005739(mitochondrion);GO:0005840(ribosome);GO:0006412(translation);GO:0009507(chloroplast);GO:0019843(rRNA binding);GO:0019843(rRNA binding)	03010(Ribosome);03010(Ribosome)	K02906	NA	50S ribosomal protein L3-2, chloroplastic-like [Asparagus officinalis]	NA	7.37218	3.7897	1.83928	0.84174	0.906454	0.738132	4.20863	2.07335	0.0111834	0.677783	up	yes
MSTRG.21518	HHC025098	rna-HHC025098.1	GO:0003824(catalytic activity);GO:0008265(Mo-molybdopterin cofactor sulfurase activity);GO:0009507(chloroplast);GO:0030151(molybdenum ion binding);GO:0030170(pyridoxal phosphate binding)	00790(Folate biosynthesis)	K15631	EC:2.8.1.9	mitochondrial amidoxime reducing component 2-like [Asparagus officinalis]	NA	5.44596	3.92241	1.72696	2.07102	1.05683	0.949131	3.2818	1.71449	0.011185	0.677783	up	yes
MSTRG.28071	HHC035319	rna-HHC035319.1	GO:0016787(hydrolase activity)	03010(Ribosome)	K02952	NA	uncharacterized protein LOC103703084 [Phoenix dactylifera]	NA	64.5016	16.3655	8.00845	6.91873	5.87217	6.01021	4.03094	2.01112	0.0112712	0.681645	up	yes
MSTRG.29906	HHC037955	rna-HHC037955.1	GO:0004674(protein serine/threonine kinase activity);GO:0005829(cytosol);GO:0006468(protein phosphorylation);GO:0035556(intracellular signal transduction)	NA	NA	NA	protein RICE SALT SENSITIVE 3-like [Phoenix dactylifera]	NA	2.10187	2.59267	0.0001	0.0001	0.0001	0.0001	11736.9	13.5188	0.0112917	0.681645	up	yes
MSTRG.35047	HHC052221	rna-HHC052221.1	GO:0000790(nuclear chromatin);GO:0003677(DNA binding);GO:0006342(chromatin silencing)	NA	NA	NA	probable histone H2A.3 [Asparagus officinalis]	NA	85.2458	69.7823	106.797	42.3362	29.9242	35.6913	2.31776	1.21273	0.0113321	0.682788	up	yes
MSTRG.10931	HHC009893	rna-HHC009893.1;MSTRG.10931.1	GO:0005739(mitochondrion);GO:0008150(biological_process)	NA	NA	NA	uncharacterized protein LOC109842844 [Asparagus officinalis]	NA	70.4234	80.1854	7.27998	10.563	6.06363	12.5118	4.53427	2.18087	0.0114952	0.691275	up	yes
MSTRG.13827	HHC014139	rna-HHC014139.2;rna-HHC014139.1	GO:0000786(nucleosome);GO:0003677(DNA binding);GO:0005634(nucleus);GO:0005794(Golgi apparatus);GO:0005829(cytosol);GO:0006334(nucleosome assembly);GO:0051276(chromosome organization);GO:0051276(chromosome organization)	NA	NA	NA	hypothetical protein PHAVU_011G164000g [Phaseolus vulgaris];Histone H4 [Triticum urartu]	NA	19.0773	15.6132	10.1587	5.45813	5.43537	4.51037	2.52909	1.33862	0.0115357	0.691275	up	yes
MSTRG.1664	HHC002127	rna-HHC002127.1	GO:0004854(xanthine dehydrogenase activity);GO:0005829(cytosol);GO:0009115(xanthine catabolic process);GO:0016903(oxidoreductase activity, acting on the aldehyde or oxo group of donors);GO:0050660(flavin adenine dinucleotide binding)	00906(Carotenoid biosynthesis)	K09842	EC:1.2.3.14	LOW QUALITY PROTEIN: indole-3-acetaldehyde oxidase-like [Asparagus officinalis]	NA	18.3201	3.99289	0.933457	0.522835	1.06372	0.500196	7.59927	2.92586	0.0115383	0.691275	up	yes
MSTRG.18615	HHC020842	rna-HHC020842.1;MSTRG.18615.1;MSTRG.18615.3	GO:0004127(cytidylate kinase activity);GO:0005524(ATP binding);GO:0005634(nucleus);GO:0005737(cytoplasm);GO:0005829(cytosol);GO:0006207('de novo' pyrimidine nucleobase biosynthetic process);GO:0006221(pyrimidine nucleotide biosynthetic process);GO:0009041(uridylate kinase activity);GO:0009173(pyrimidine ribonucleoside monophosphate metabolic process);GO:0048046(apoplast)	00240(Pyrimidine metabolism)	K13800	EC:2.7.4.14	UMP-CMP kinase 3-like [Asparagus officinalis]	NA	10.6926	8.52766	2.40352	1.72115	1.62231	1.87466	3.33788	1.73893	0.0115857	0.692806	up	yes
MSTRG.13461	HHC013649	rna-HHC013649.1	NA	NA	NA	NA		NA	73.9921	27.5729	5.96863	7.31433	4.89984	7.60867	4.59079	2.19874	0.0116702	0.69655	up	yes
MSTRG.24659	HHC029771	rna-HHC029771.1;MSTRG.24659.1	GO:0005515(protein binding);GO:0005886(plasma membrane);GO:0009534(chloroplast thylakoid);GO:0033614(chloroplast proton-transporting ATP synthase complex assembly)	NA	NA	NA	PREDICTED: uncharacterized protein LOC103996124 [Musa acuminata subsp. malaccensis]	NA	121.93	51.1111	85.427	36.1629	28.7889	28.4354	2.57435	1.36421	0.011726	0.69747	up	yes
MSTRG.30208	HHC038459	rna-HHC038459.1	NA	NA	NA	NA		NA	76.7012	68.4221	38.0427	24.2995	19.5838	21.6975	2.51283	1.32931	0.0117296	0.69747	up	yes
MSTRG.18664	HHC020896	rna-HHC020896.1	NA	NA	NA	NA		NA	2.86701	5.60101	0.364912	0.0001	0.0567229	0.152234	21.136	4.40163	0.0117676	0.698423	up	yes
MSTRG.28361	HHC035716	MSTRG.28361.1;rna-HHC035716.1	GO:0004066(asparagine synthase (glutamine-hydrolyzing) activity);GO:0005829(cytosol);GO:0006529(asparagine biosynthetic process);GO:0006541(glutamine metabolic process);GO:0042803(protein homodimerization activity)	NA	NA	NA	stem-specific protein TSJT1-like [Asparagus officinalis]	NA	47.0231	2.70795	1.60865	0.90859	1.54314	0.749109	11.3967	3.51055	0.0118584	0.702499	up	yes
MSTRG.7987	HHC046253	rna-HHC046253.2;rna-HHC046253.1	GO:0003677(DNA binding);GO:0003700(DNA binding transcription factor activity);GO:0005634(nucleus);GO:0006351(transcription, DNA-templated);GO:0006355(regulation of transcription, DNA-templated);GO:0006355(regulation of transcription, DNA-templated)	04075(Plant hormone signal transduction);04075(Plant hormone signal transduction)	K14491	NA	myb family transcription factor EFM-like [Asparagus officinalis]	NA	24.8814	26.5389	6.84054	3.09809	3.17852	4.3644	4.06732	2.02408	0.011885	0.702757	up	yes
MSTRG.13079	HHC013092	rna-HHC013092.1	GO:0009507(chloroplast);GO:0009813(flavonoid biosynthetic process);GO:0009964(negative regulation of flavonoid biosynthetic process);GO:0016491(oxidoreductase activity);GO:0033729(anthocyanidin reductase activity);GO:0050662(coenzyme binding);GO:0055114(oxidation-reduction process)	NA	NA	NA	anthocyanidin reductase ((2S)-flavan-3-ol-forming) [Asparagus officinalis]	NA	1.72573	5.83441	0.605802	0.427755	0.432084	0.334123	5.60795	2.48747	0.0119247	0.702757	up	yes
MSTRG.34685	HHC053011	rna-HHC053011.1	GO:0000103(sulfate assimilation);GO:0004604(phosphoadenylyl-sulfate reductase (thioredoxin) activity);GO:0009507(chloroplast);GO:0009534(chloroplast thylakoid);GO:0009570(chloroplast stroma);GO:0009973(adenylyl-sulfate reductase activity);GO:0016671(oxidoreductase activity, acting on a sulfur group of donors, disulfide as acceptor);GO:0019344(cysteine biosynthetic process);GO:0019379(sulfate assi…	00920(Sulfur metabolism)	K05907	EC:1.8.4.9	5'-adenylylsulfate reductase [Polygonatum pubescens]	NA	16.0687	166.875	188.862	21.965	20.414	22.3557	4.60338	2.20269	0.0119391	0.702757	up	yes
MSTRG.30064	HHC038213	rna-HHC038213.1	GO:0005737(cytoplasm)	04016(MAPK signaling pathway - plant)	K20604	EC:2.7.12.2	mitogen-activated protein kinase kinase 9-like [Phoenix dactylifera]	NA	115.71	48.6225	62.1685	35.4834	28.7218	23.6235	2.50246	1.32335	0.0119513	0.702757	up	yes
MSTRG.26603	HHC032949	rna-HHC032949.1	GO:0005506(iron ion binding);GO:0005739(mitochondrion);GO:0005829(cytosol);GO:0005886(plasma membrane);GO:0006974(cellular response to DNA damage stimulus);GO:0008270(zinc ion binding);GO:0009228(thiamine biosynthetic process);GO:0009409(response to cold);GO:0009507(chloroplast);GO:0009570(chloroplast stroma);GO:0009579(thylakoid);GO:0009941(chloroplast envelope);GO:0010319(stromule);GO:0018131(o…	00730(Thiamine metabolism)	K03146	EC:2.4.2.60	PREDICTED: thiamine thiazole synthase, chloroplastic [Elaeis guineensis]	NA	1913.65	972.804	1331.14	460.973	435.466	432.097	2.69639	1.43103	0.0120033	0.703322	up	yes
MSTRG.32972	HHC047350	rna-HHC047350.1	GO:0005515(protein binding);GO:0005634(nucleus);GO:0005739(mitochondrion);GO:0005829(cytosol);GO:0006535(cysteine biosynthetic process from serine);GO:0009001(serine O-acetyltransferase activity);GO:0009409(response to cold);GO:0009507(chloroplast);GO:0009970(cellular response to sulfate starvation);GO:0019344(cysteine biosynthetic process)	00920(Sulfur metabolism);00270(Cysteine and methionine metabolism)	K00640	EC:2.3.1.30	PREDICTED: serine acetyltransferase 1, chloroplastic [Elaeis guineensis]	NA	25.0356	13.0092	31.3148	7.18698	6.30061	5.09348	3.35905	1.74805	0.0120052	0.703322	up	yes
MSTRG.20935		MSTRG.20935.1	NA	NA	NA	NA		NA	3.13535	2.64685	1.73717	0.538879	0.394621	0.098249	8.17482	3.03119	0.0120458	0.704404	up	yes
MSTRG.7811		MSTRG.7811.1	NA	NA	NA	NA		NA	95.3868	46.1715	42.0907	24.4041	19.4736	18.52	2.738	1.45312	0.0120809	0.705156	up	yes
MSTRG.2991	HHC004195	MSTRG.2991.2;rna-HHC004195.1	GO:0000184(nuclear-transcribed mRNA catabolic process, nonsense-mediated decay);GO:0000932(P-body);GO:0003677(DNA binding);GO:0003724(RNA helicase activity);GO:0003729(mRNA binding);GO:0004386(helicase activity);GO:0005515(protein binding);GO:0005524(ATP binding);GO:0005737(cytoplasm);GO:0005829(cytosol);GO:0005886(plasma membrane);GO:0008270(zinc ion binding);GO:0009506(plasmodesma);GO:0009611(r…	03013(RNA transport);03015(mRNA surveillance pathway)	K14326	EC:3.6.4.-	PREDICTED: regulator of nonsense transcripts 1 homolog [Elaeis guineensis]	NA	2.38069	5.33532	3.90537	5.53912	10.3396	11.2411	0.397589	-1.33065	0.0121686	0.705469	down	yes
MSTRG.18215	HHC020332	rna-HHC020332.2;rna-HHC020332.1	GO:0005739(mitochondrion);GO:0006457(protein folding);GO:0030150(protein import into mitochondrial matrix);GO:0050821(protein stabilization);GO:0051087(chaperone binding);GO:0051087(chaperone binding)	NA	NA	NA	uncharacterized protein LOC103718920 [Phoenix dactylifera]	NA	50.101	32.0499	15.9081	10.6061	8.59195	10.5875	2.83285	1.50225	0.0121838	0.705469	up	yes
MSTRG.1640	HHC002084	MSTRG.1640.1	NA	NA	NA	NA		NA	0.0196068	0.543632	2.1491	3.79872	3.55326	16.0375	0.166177	-2.58921	0.0121874	0.705469	down	yes
MSTRG.31044	HHC039639	rna-HHC039639.1	GO:0009507(chloroplast);GO:0009523(photosystem II);GO:0009535(chloroplast thylakoid membrane);GO:0009611(response to wounding);GO:0009765(photosynthesis, light harvesting);GO:0016021(integral component of membrane);GO:0016168(chlorophyll binding);GO:0071486(cellular response to high light intensity);GO:0071492(cellular response to UV-A)	NA	NA	NA	PREDICTED: stress enhanced protein 2, chloroplastic [Elaeis guineensis]	NA	39.892	19.9272	17.4025	9.02497	8.70575	7.81842	2.60971	1.38389	0.0121909	0.705469	up	yes
MSTRG.771	HHC000933	rna-HHC000933.1;rna-HHC000933.2;MSTRG.771.1	GO:0003674(molecular_function);GO:0006950(response to stress);GO:0009535(chloroplast thylakoid membrane);GO:0009535(chloroplast thylakoid membrane)	NA	NA	NA	probable plastid-lipid-associated protein 2, chloroplastic [Asparagus officinalis]	NA	1640.73	1122.49	636.574	339.525	330.706	326.564	2.84458	1.50821	0.0121974	0.705469	up	yes
MSTRG.2717		MSTRG.2717.1	NA	NA	NA	NA		NA	36.8591	37.7081	13.0288	6.70181	8.02631	5.86111	3.39508	1.76345	0.0123152	0.710271	up	yes
MSTRG.33966	HHC048088	MSTRG.33966.1;rna-HHC048088.1	GO:0005777(peroxisome);GO:0006631(fatty acid metabolic process);GO:0016874(ligase activity)	NA	NA	NA	PREDICTED: probable acyl-activating enzyme 5, peroxisomal [Elaeis guineensis]	NA	90.397	36.7009	17.4732	9.50293	8.52466	12.8317	3.60722	1.85089	0.0123251	0.710271	up	yes
MSTRG.33550	HHC053580;HHC053582	MSTRG.33550.4;rna-HHC053580.1;MSTRG.33550.3;MSTRG.33550.5;rna-HHC053582.1;MSTRG.33550.2	GO:0005634(nucleus);GO:0005829(cytosol);GO:0008171(O-methyltransferase activity);GO:0009805(coumarin biosynthetic process);GO:0009809(lignin biosynthetic process);GO:0032259(methylation);GO:0042409(caffeoyl-CoA O-methyltransferase activity);GO:0046686(response to cadmium ion);GO:0046872(metal ion binding);GO:0046872(metal ion binding)	00360(Phenylalanine metabolism);00940(Phenylpropanoid biosynthesis);00945(Stilbenoid, diarylheptanoid and gingerol biosynthesis);00941(Flavonoid biosynthesis);00941(Flavonoid biosynthesis)	K00588	EC:2.1.1.104	PREDICTED: caffeoyl-CoA O-methyltransferase [Nelumbo nucifera];caffeoyl-CoA O-methyltransferase [Amborella trichopoda]	NA	40.8055	41.279	23.6435	17.0126	13.2273	13.0112	2.33894	1.22585	0.0123511	0.710481	up	yes
MSTRG.34465	HHC049326	rna-HHC049326.1	GO:0002239(response to oomycetes);GO:0003674(molecular_function);GO:0009506(plasmodesma);GO:0009507(chloroplast);GO:0016021(integral component of membrane);GO:0055085(transmembrane transport)	NA	NA	NA	PREDICTED: uncharacterized protein LOC103994629 [Musa acuminata subsp. malaccensis]	NA	113.525	28.6752	36.2618	11.5111	13.6472	13.7905	3.4619	1.79157	0.0124978	0.716669	up	yes
MSTRG.34706	HHC050912	rna-HHC050912.1	GO:0004674(protein serine/threonine kinase activity);GO:0005829(cytosol);GO:0006468(protein phosphorylation);GO:0035556(intracellular signal transduction)	NA	NA	NA	protein RICE SALT SENSITIVE 3-like [Phoenix dactylifera]	NA	4.79924	5.35908	0.316671	0.682147	0.460801	0.0470302	10.9851	3.45747	0.0125412	0.716669	up	yes
MSTRG.10940	HHC009906	rna-HHC009906.2;rna-HHC009906.1	GO:0003674(molecular_function);GO:0005634(nucleus);GO:0008150(biological_process);GO:0008150(biological_process)	NA	NA	NA	uncharacterized protein LOC110018953 [Phalaenopsis equestris]	NA	22.3132	23.1979	14.864	7.34406	5.22918	7.56284	2.64693	1.40432	0.0125549	0.716669	up	yes
MSTRG.35116	HHC054135	rna-HHC054135.1	GO:0001682(tRNA 5'-leader removal);GO:0004526(ribonuclease P activity);GO:0005739(mitochondrion);GO:0008033(tRNA processing);GO:0009507(chloroplast);GO:0046872(metal ion binding)	03013(RNA transport)	K18213	EC:3.1.26.5	proteinaceous RNase P 1, chloroplastic/mitochondrial-like [Phoenix dactylifera]	NA	21.6332	7.86041	17.8359	2.26513	3.75952	0.67657	5.58991	2.48282	0.0125629	0.716669	up	yes
MSTRG.8410	HHC046942	rna-HHC046942.2;MSTRG.8410.1;rna-HHC046942.1	GO:0005886(plasma membrane);GO:0030001(metal ion transport);GO:0046872(metal ion binding);GO:0005737(cytoplasm);GO:0046914(transition metal ion binding);GO:0046916(cellular transition metal ion homeostasis);GO:0046916(cellular transition metal ion homeostasis)	NA	NA	NA	hypothetical protein GW17_00039050 [Ensete ventricosum];hypothetical protein B296_00018381 [Ensete ventricosum]	NA	31.7329	54.9653	4.61971	6.40308	4.5799	6.96133	4.23356	2.08187	0.0125716	0.716669	up	yes
MSTRG.25133	HHC030466	rna-HHC030466.1	NA	NA	NA	NA	cysteine-rich and transmembrane domain-containing protein A-like isoform X2 [Dendrobium catenatum]	NA	5.3597	3.69579	3.89365	1.09895	0.0001	0.703533	9.98255	3.31941	0.0126143	0.717074	up	yes
MSTRG.32318		MSTRG.32318.1	NA	NA	NA	NA		NA	0.562664	0.294643	0.37714	0.38894	1.74368	1.61634	0.241574	-2.04946	0.0126451	0.717074	down	yes
MSTRG.29087	HHC036716	rna-HHC036716.1;MSTRG.29087.2	GO:0005634(nucleus);GO:0006807(nitrogen compound metabolic process);GO:0060776(simple leaf morphogenesis)	NA	NA	NA	PREDICTED: LOB domain-containing protein 37-like [Musa acuminata subsp. malaccensis]	NA	43.9394	69.8075	105.903	17.7233	22.4533	19.6697	2.81762	1.49448	0.0126847	0.717074	up	yes
MSTRG.24610	HHC029705	rna-HHC029705.1	GO:0000786(nucleosome);GO:0003677(DNA binding);GO:0005634(nucleus);GO:0005794(Golgi apparatus);GO:0005829(cytosol);GO:0006334(nucleosome assembly);GO:0051276(chromosome organization)	NA	NA	NA	hypothetical protein EUGRSUZ_J02062, partial [Eucalyptus grandis]	NA	26.0396	30.6221	27.4387	16.3686	10.3203	12.2121	2.22944	1.15668	0.0126879	0.717074	up	yes
MSTRG.10337	HHC008960	rna-HHC008960.1	GO:0000981(RNA polymerase II transcription factor activity, sequence-specific DNA binding);GO:0003677(DNA binding);GO:0003700(DNA binding transcription factor activity);GO:0005634(nucleus);GO:0006351(transcription, DNA-templated);GO:0006355(regulation of transcription, DNA-templated);GO:0007275(multicellular organism development);GO:0009414(response to water deprivation);GO:0009651(response to sa…	NA	NA	NA	PREDICTED: AP2-like ethylene-responsive transcription factor At1g16060 [Elaeis guineensis]	NA	13.575	11.761	2.60719	1.54583	1.92331	0.828449	5.35822	2.42175	0.0126916	0.717074	up	yes
MSTRG.13334	HHC013472	MSTRG.13334.1;rna-HHC013472.1	GO:0004674(protein serine/threonine kinase activity);GO:0005886(plasma membrane);GO:0006468(protein phosphorylation);GO:0006952(defense response);GO:0009506(plasmodesma)	NA	NA	NA	pathogenesis-related protein PR1-RK isoform 8 [Triticum urartu]	NA	10.6935	5.32774	0.485176	0.900744	0.652237	0.675407	6.55567	2.71274	0.0127473	0.718009	up	yes
MSTRG.21779	HHC025423	rna-HHC025423.1	GO:0046658(anchored component of plasma membrane)	NA	NA	NA	PREDICTED: basic blue protein-like [Elaeis guineensis]	NA	0.166221	0.0959443	0.136152	0.377681	0.726934	0.776147	0.258136	-1.9538	0.0127635	0.718009	down	yes
MSTRG.16052	HHC017058	MSTRG.16052.1	NA	NA	NA	NA		NA	0.0001	0.144336	0.0667578	0.305408	0.908286	0.866932	0.145504	-2.78087	0.0127822	0.718009	down	yes
MSTRG.8207	HHC046628	rna-HHC046628.1	GO:0003674(molecular_function);GO:0005634(nucleus);GO:0008150(biological_process)	NA	NA	NA	PREDICTED: uncharacterized protein LOC105040205 [Elaeis guineensis]	NA	5.71732	6.76228	9.08759	3.51767	2.85731	2.34596	2.41049	1.26933	0.0128064	0.718009	up	yes
MSTRG.24239		MSTRG.24239.1	NA	NA	NA	NA		NA	26.7847	10.9905	2.25792	2.22956	2.02358	2.4163	4.75944	2.25079	0.0128212	0.718009	up	yes
gene-HHC011098	HHC011098	rna-HHC011098.2;rna-HHC011098.1	GO:0003674(molecular_function);GO:0005576(extracellular region);GO:0008150(biological_process);GO:0008150(biological_process)	NA	NA	NA	PREDICTED: uncharacterized protein LOC103991613 [Musa acuminata subsp. malaccensis]	NA	4.3395	3.67588	1.9757	0.879469	0.759312	0.731341	3.64624	1.86641	0.0128604	0.718935	up	yes
MSTRG.33092	HHC049549	rna-HHC049549.1	GO:0003674(molecular_function);GO:0005634(nucleus);GO:0009733(response to auxin)	04075(Plant hormone signal transduction)	K14488	NA	auxin-responsive protein SAUR32-like [Phoenix dactylifera]	NA	11.3841	4.99095	4.6922	0.555373	0.156291	1.68226	5.88036	2.5559	0.0128941	0.719555	up	yes
MSTRG.18716	HHC020980	rna-HHC020980.1	NA	NA	NA	NA	hypothetical protein GW17_00040297 [Ensete ventricosum]	NA	68.9092	27.6591	1.56146	4.14245	4.16992	2.43011	7.74785	2.9538	0.0129538	0.721374	up	yes
MSTRG.1906	HHC002489	rna-HHC002489.1	GO:0000139(Golgi membrane);GO:0000271(polysaccharide biosynthetic process);GO:0000977(RNA polymerase II regulatory region sequence-specific DNA binding);GO:0005783(endoplasmic reticulum);GO:0005794(Golgi apparatus);GO:0005886(plasma membrane);GO:0009832(plant-type cell wall biogenesis);GO:0009833(plant-type primary cell wall biogenesis);GO:0016021(integral component of membrane);GO:0016757(transf…	NA	NA	NA	cellulose synthase-like protein E6 isoform X1 [Asparagus officinalis]	NA	9.57712	29.3673	5.28304	2.92964	2.4997	3.70747	3.79859	1.92547	0.0129882	0.721374	up	yes
MSTRG.1944	HHC002550	MSTRG.1944.2;rna-HHC002550.1	GO:0004497(monooxygenase activity);GO:0007275(multicellular organism development);GO:0009647(skotomorphogenesis);GO:0010268(brassinosteroid homeostasis);GO:0016125(sterol metabolic process);GO:0016132(brassinosteroid biosynthetic process);GO:0020037(heme binding)	00905(Brassinosteroid biosynthesis)	K12639	EC:1.14.13.-	LOW QUALITY PROTEIN: cytochrome P450 724B1-like [Asparagus officinalis]	NA	32.5463	46.2637	1.78198	2.88196	3.71561	3.37614	5.88528	2.55711	0.0129949	0.721374	up	yes
MSTRG.6793	HHC044338	rna-HHC044338.1	NA	NA	NA	NA	PREDICTED: uncharacterized protein LOC105047220 [Elaeis guineensis]	NA	1.40451	2.37268	0.160754	0.350086	0.0125605	0.170809	11.6923	3.54749	0.0130306	0.722095	up	yes
MSTRG.18820	HHC021119	MSTRG.18820.1;rna-HHC021119.1;MSTRG.18820.2	GO:0005516(calmodulin binding);GO:0005634(nucleus);GO:0009739(response to gibberellin)	NA	NA	NA	PREDICTED: protein IQ-DOMAIN 1-like [Elaeis guineensis]	NA	2.90381	9.82636	30.2333	15.1157	49.5055	51.515	0.287463	-1.79855	0.0131482	0.726815	down	yes
MSTRG.4716	HHC041367	rna-HHC041367.1;rna-HHC041367.2;MSTRG.4716.2;rna-HHC041367.3	GO:0005634(nucleus);GO:0005737(cytoplasm);GO:0016787(hydrolase activity);GO:0016787(hydrolase activity)	NA	NA	NA	uncharacterized protein LOC109842856 isoform X1 [Asparagus officinalis]	NA	32.0496	41.8486	3.54042	4.83327	4.27983	4.802	4.52948	2.17935	0.0131615	0.726815	up	yes
MSTRG.6151	HHC043461	rna-HHC043461.1;rna-HHC043461.2	GO:0000245(spliceosomal complex assembly);GO:0005681(spliceosomal complex);GO:0005682(U5 snRNP);GO:0046540(U4/U6 x U5 tri-snRNP complex);GO:0046540(U4/U6 x U5 tri-snRNP complex)	03040(Spliceosome);03040(Spliceosome)	K12859	NA	hypothetical protein Ahy_B04g071666 [Arachis hypogaea];PREDICTED: thioredoxin-like protein YLS8 [Brassica rapa]	NA	144.131	351.039	113.106	56.5331	54.8418	59.8788	2.89751	1.53482	0.0131868	0.726944	up	yes
MSTRG.32971	HHC047348	rna-HHC047348.1	GO:0005351(carbohydrate:proton symporter activity);GO:0005355(glucose transmembrane transporter activity);GO:0005887(integral component of plasma membrane);GO:0046323(glucose import)	NA	NA	NA	sugar transporter [Allium sativum]	NA	142.049	49.1822	16.9085	17.1648	13.5234	15.987	3.81738	1.93258	0.0132422	0.72767	up	yes
MSTRG.36010	HHC050822	MSTRG.36010.2;rna-HHC050822.1	NA	NA	NA	NA	COMPASS-like H3K4 histone methylase component WDR5A [Prunus persica]	NA	1.20933	0.534185	0.421775	0.173191	0.0001	0.125661	9.29731	3.21681	0.0132458	0.72767	up	yes
MSTRG.36160	HHC049451	rna-HHC049451.1;MSTRG.36160.2	GO:0004124(cysteine synthase activity);GO:0005737(cytoplasm);GO:0006535(cysteine biosynthetic process from serine);GO:0030170(pyridoxal phosphate binding)	00920(Sulfur metabolism);00270(Cysteine and methionine metabolism)	K01738	EC:2.5.1.47	cysteine synthase-like [Asparagus officinalis]	NA	189.018	195.77	99.13	51.8892	55.1899	46.3818	2.63758	1.39922	0.0133478	0.73093	up	yes
MSTRG.15769	HHC016676	rna-HHC016676.1	GO:0005634(nucleus);GO:0007165(signal transduction);GO:0035091(phosphatidylinositol binding)	NA	NA	NA	VAN3-binding protein-like [Asparagus officinalis]	NA	24.7915	21.0092	14.2075	7.55629	6.83488	6.98372	2.44469	1.28965	0.0133512	0.73093	up	yes
MSTRG.32694	HHC052759	rna-HHC052759.1;MSTRG.32694.3;MSTRG.32694.1	GO:0003677(DNA binding);GO:0005096(GTPase activator activity);GO:0005634(nucleus);GO:0005768(endosome);GO:0005802(trans-Golgi network);GO:0005829(cytosol);GO:0010227(floral organ abscission);GO:0016192(vesicle-mediated transport);GO:0046872(metal ion binding);GO:0090630(activation of GTPase activity)	04144(Endocytosis)	K12486	NA	probable ADP-ribosylation factor GTPase-activating protein AGD5 [Asparagus officinalis]	NA	189.138	90.8509	30.6447	21.9526	21.8942	25.1272	3.53654	1.82234	0.0133925	0.731931	up	yes
MSTRG.31187	HHC039831	rna-HHC039831.1	GO:0005515(protein binding)	NA	NA	NA	PREDICTED: 14-3-3 protein 10 [Capsicum annuum]	NA	88.8058	35.1561	12.2295	6.77965	8.03745	9.75414	4.01794	2.00646	0.013441	0.732669	up	yes
MSTRG.4401	HHC040777	MSTRG.4401.1;rna-HHC040777.2;rna-HHC040777.1	GO:0000302(response to reactive oxygen species);GO:0004322(ferroxidase activity);GO:0005506(iron ion binding);GO:0005739(mitochondrion);GO:0006826(iron ion transport);GO:0006879(cellular iron ion homeostasis);GO:0006880(intracellular sequestering of iron ion);GO:0008199(ferric iron binding);GO:0009507(chloroplast);GO:0009570(chloroplast stroma);GO:0009908(flower development);GO:0009941(chloroplas…	NA	NA	NA	ferritin-4, chloroplastic-like [Ananas comosus];ferritin [Lycoris aurea]	NA	1077.31	1265.54	814.625	356.478	347.912	342.465	2.54495	1.34764	0.0134554	0.732669	up	yes
MSTRG.17152	HHC018529	rna-HHC018529.1	GO:0003677(DNA binding);GO:0003700(DNA binding transcription factor activity);GO:0005634(nucleus);GO:0006351(transcription, DNA-templated);GO:0006355(regulation of transcription, DNA-templated);GO:0009873(ethylene-activated signaling pathway)	NA	NA	NA	ethylene-responsive transcription factor RAP2-1 [Phoenix dactylifera]	NA	47.1502	24.6409	35.3475	16.365	14.0779	11.8651	2.38028	1.25113	0.0134752	0.732669	up	yes
MSTRG.14312	HHC014818	rna-HHC014818.1	GO:0005200(structural constituent of cytoskeleton);GO:0005515(protein binding);GO:0005524(ATP binding);GO:0005618(cell wall);GO:0005730(nucleolus);GO:0005737(cytoplasm);GO:0005739(mitochondrion);GO:0005829(cytosol);GO:0005856(cytoskeleton);GO:0005886(plasma membrane);GO:0007010(cytoskeleton organization);GO:0009416(response to light stimulus);GO:0009506(plasmodesma);GO:0009570(chloroplast stroma)…	NA	NA	NA	PREDICTED: actin-101-like isoform X1 [Elaeis guineensis]	NA	124.827	47.8316	66.1519	39.6859	28.9191	27.5276	2.46689	1.3027	0.0134987	0.73269	up	yes
MSTRG.33564	HHC051352	rna-HHC051352.1	GO:0009507(chloroplast);GO:0009534(chloroplast thylakoid);GO:0009535(chloroplast thylakoid membrane);GO:0009579(thylakoid);GO:0009735(response to cytokinin);GO:0009941(chloroplast envelope);GO:0015078(proton transmembrane transporter activity);GO:0015986(ATP synthesis coupled proton transport);GO:0016020(membrane);GO:0016021(integral component of membrane);GO:0016787(hydrolase activity);GO:004274…	00190(Oxidative phosphorylation);00195(Photosynthesis)	K02109	NA	ATP synthase subunit b', chloroplastic [Phoenix dactylifera]	NA	505.889	463.967	532.358	181.349	170.842	169.671	2.4721	1.30574	0.0135304	0.732742	up	yes
MSTRG.23385	HHC028083	MSTRG.23385.1;rna-HHC028083.1	GO:0004674(protein serine/threonine kinase activity);GO:0004713(protein tyrosine kinase activity);GO:0004714(transmembrane receptor protein tyrosine kinase activity);GO:0005515(protein binding);GO:0005524(ATP binding);GO:0005886(plasma membrane);GO:0006468(protein phosphorylation);GO:0006952(defense response);GO:0007169(transmembrane receptor protein tyrosine kinase signaling pathway);GO:0010942(…	NA	NA	NA	leucine-rich repeat receptor-like serine/threonine/tyrosine-protein kinase SOBIR1 [Asparagus officinalis]	NA	446.843	70.5936	43.5108	27.0039	28.5982	31.7612	4.87042	2.28405	0.0135458	0.732742	up	yes
MSTRG.11295	HHC010419	rna-HHC010419.1	GO:0000719(photoreactive repair);GO:0005634(nucleus);GO:0005737(cytoplasm);GO:0005829(cytosol);GO:0005975(carbohydrate metabolic process);GO:0006281(DNA repair);GO:0009409(response to cold);GO:0009411(response to UV);GO:0016853(isomerase activity)	NA	NA	NA	DNA damage-repair/toleration protein DRT102 [Dendrobium catenatum]	NA	12.7747	9.14592	10.6486	3.87624	4.17648	3.02165	2.53159	1.34004	0.0135781	0.732846	up	yes
gene-HHC042570	HHC042570	rna-HHC042570.1	GO:0003677(DNA binding);GO:0003700(DNA binding transcription factor activity);GO:0005634(nucleus);GO:0006351(transcription, DNA-templated);GO:0006355(regulation of transcription, DNA-templated);GO:0007275(multicellular organism development);GO:0009908(flower development)	04141(Protein processing in endoplasmic reticulum);04120(Ubiquitin mediated proteolysis)	K03094	NA	NAC domain-containing protein 35-like [Asparagus officinalis]	NA	6.18395	5.71707	0.463664	0.339319	0.457792	0.0001	13.8723	3.79413	0.0136006	0.732846	up	yes
MSTRG.7121	HHC044708	MSTRG.7121.1	NA	NA	NA	NA		NA	7.71257	1.87713	0.944803	0.387513	0.429008	0.4529	6.19227	2.63047	0.0136393	0.732846	up	yes
MSTRG.16570	HHC017766	rna-HHC017766.1	GO:0003700(DNA binding transcription factor activity);GO:0005634(nucleus);GO:0043565(sequence-specific DNA binding);GO:0044212(transcription regulatory region DNA binding)	NA	NA	NA	zinc finger protein ZAT10 [Phoenix dactylifera]	NA	5.2609	7.20534	67.7545	2.91079	3.41521	3.71601	5.8287	2.54318	0.01364	0.732846	up	yes
gene-HHC025474	HHC025474	rna-HHC025474.1	GO:0003723(RNA binding);GO:0004519(endonuclease activity);GO:0009451(RNA modification);GO:0009507(chloroplast);GO:0009793(embryo development ending in seed dormancy);GO:0010098(suspensor development);GO:0043231(intracellular membrane-bounded organelle)	NA	NA	NA	pentatricopeptide repeat-containing protein At5g65560 [Glycine max]	NA	0.456685	0.353018	0.315073	0.215606	0.0150383	0.0892572	6.42588	2.68389	0.0137278	0.73579	up	yes
MSTRG.23418	HHC028129	rna-HHC028129.1;MSTRG.23418.1	GO:0005515(protein binding);GO:0005634(nucleus);GO:0005783(endoplasmic reticulum);GO:0009555(pollen development);GO:0010584(pollen exine formation);GO:0016491(oxidoreductase activity);GO:0048316(seed development);GO:0050662(coenzyme binding);GO:0055114(oxidation-reduction process);GO:0080110(sporopollenin biosynthetic process)	00941(Flavonoid biosynthesis)	K13082	EC:1.1.1.219;EC:1.1.1.234	tetraketide alpha-pyrone reductase 1-like isoform X1 [Asparagus officinalis]	NA	0.0984664	123.397	4.21855	1.91488	1.02371	1.77681	23.1437	4.53255	0.0137597	0.73579	up	yes
MSTRG.18753	HHC021031	rna-HHC021031.1	GO:0003674(molecular_function);GO:0005634(nucleus);GO:0009733(response to auxin)	04075(Plant hormone signal transduction)	K14488	NA	PREDICTED: auxin-responsive protein SAUR32-like [Elaeis guineensis]	NA	26.1489	18.9563	11.6213	6.90066	5.45206	6.59872	2.63996	1.40052	0.0137778	0.73579	up	yes
MSTRG.14939	HHC015671	rna-HHC015671.1	GO:0005575(cellular_component);GO:0016491(oxidoreductase activity);GO:0055114(oxidation-reduction process)	00061(Fatty acid biosynthesis);01040(Biosynthesis of unsaturated fatty acids);00780(Biotin metabolism);00333(Prodigiosin biosyntheses)	K00059	EC:1.1.1.100	uncharacterized protein LOC103720253 [Phoenix dactylifera]	NA	864.773	217.058	87.1327	62.8715	66.7161	70.5074	4.48843	2.16621	0.0137985	0.73579	up	yes
MSTRG.5818	HHC042989	rna-HHC042989.2;rna-HHC042989.1	GO:0000790(nuclear chromatin);GO:0003677(DNA binding);GO:0006342(chromatin silencing);GO:0000786(nucleosome);GO:0005634(nucleus);GO:0005794(Golgi apparatus);GO:0005829(cytosol);GO:0006334(nucleosome assembly);GO:0051276(chromosome organization);GO:0051276(chromosome organization)	NA	NA	NA	hypothetical protein B456_009G393400 [Gossypium raimondii];Histone H4, putative, expressed [Oryza sativa Japonica Group]	NA	19.9846	32.036	18.699	7.81183	7.83735	8.13986	2.45761	1.29725	0.013818	0.73579	up	yes
MSTRG.8692	HHC006223	rna-HHC006223.1	GO:0003674(molecular_function);GO:0005739(mitochondrion);GO:0008150(biological_process);GO:0016021(integral component of membrane)	NA	NA	NA	PREDICTED: uncharacterized protein LOC105046287 [Elaeis guineensis]	NA	27.9914	35.0263	16.8953	7.6739	7.35188	9.49045	2.6002	1.37862	0.0138339	0.73579	up	yes
MSTRG.29404	HHC037167	MSTRG.29404.1;MSTRG.29404.2;rna-HHC037167.1	GO:0003674(molecular_function);GO:0005634(nucleus);GO:0008150(biological_process)	NA	NA	NA	rRNA-processing protein fcf2-like [Phoenix dactylifera]	NA	24.3935	14.5267	16.8075	6.51568	3.32591	6.37511	3.20808	1.68171	0.0138609	0.735994	up	yes
gene-HHC053096	HHC053096	rna-HHC053096.1	GO:0003674(molecular_function);GO:0005634(nucleus);GO:0016567(protein ubiquitination)	NA	NA	NA	PREDICTED: F-box protein SKIP8 [Elaeis guineensis]	NA	8.71259	6.71251	7.51014	4.64777	2.78082	0.633331	4.03951	2.01418	0.0139666	0.739377	up	yes
MSTRG.11056	HHC010065	rna-HHC010065.1	GO:0000272(polysaccharide catabolic process);GO:0004568(chitinase activity);GO:0005576(extracellular region);GO:0005618(cell wall);GO:0006032(chitin catabolic process);GO:0006952(defense response);GO:0008061(chitin binding);GO:0009611(response to wounding);GO:0009617(response to bacterium);GO:0009626(plant-type hypersensitive response);GO:0010262(somatic embryogenesis);GO:0016998(cell wall macrom…	00520(Amino sugar and nucleotide sugar metabolism)	K01183	EC:3.2.1.14	PREDICTED: endochitinase PR4-like [Nelumbo nucifera]	NA	39.1825	14.9406	6.10728	4.60782	3.96187	5.25431	3.51763	1.8146	0.0139712	0.739377	up	yes
MSTRG.18123	HHC020178	rna-HHC020178.1;MSTRG.18123.1;MSTRG.18123.2	GO:0009507(chloroplast);GO:0009535(chloroplast thylakoid membrane);GO:0010258(NADH dehydrogenase complex (plastoquinone) assembly);GO:0010598(NAD(P)H dehydrogenase complex (plastoquinone));GO:0016655(oxidoreductase activity, acting on NAD(P)H, quinone or similar compound as acceptor);GO:0048038(quinone binding);GO:0055114(oxidation-reduction process)	NA	NA	NA	LOW QUALITY PROTEIN: NAD(P)H-quinone oxidoreductase subunit M, chloroplastic [Asparagus officinalis]	NA	80.0993	60.1067	38.7238	18.627	17.7782	19.7508	2.63206	1.39619	0.0140672	0.741906	up	yes
MSTRG.13754	HHC014042	rna-HHC014042.1;rna-HHC014042.2	GO:0005634(nucleus);GO:0016491(oxidoreductase activity);GO:0046872(metal ion binding);GO:0055114(oxidation-reduction process);GO:0055114(oxidation-reduction process)	NA	NA	NA	clavaminate synthase-like protein At3g21360 [Dendrobium catenatum]	NA	32.9623	18.5317	0.906798	2.41389	2.12551	2.53459	5.88127	2.55613	0.014092	0.741906	up	yes
MSTRG.3970	HHC005867;HHC005865	MSTRG.3970.3;MSTRG.3970.1;MSTRG.3970.2	NA	NA	NA	NA		NA	18.9088	30.7818	32.8255	51.9273	85.2996	83.7933	0.397543	-1.33082	0.0141368	0.741906	down	yes
MSTRG.32789	HHC047619	rna-HHC047619.1;MSTRG.32789.2	GO:0005773(vacuole);GO:0005774(vacuolar membrane);GO:0006508(proteolysis);GO:0006751(glutathione catabolic process);GO:0006805(xenobiotic metabolic process);GO:0009636(response to toxic substance);GO:0016021(integral component of membrane);GO:0016756(glutathione gamma-glutamylcysteinyltransferase activity);GO:0036374(glutathione hydrolase activity);GO:0102953(hypoglycin A gamma-glutamyl transpept…	00590(Arachidonic acid metabolism);00430(Taurine and hypotaurine metabolism);00460(Cyanoamino acid metabolism);00480(Glutathione metabolism)	K18592	EC:2.3.2.2;EC:3.4.19.13	gamma-glutamyl transpeptidase [Allium sativum]	NA	27.0159	21.8248	10.9167	7.82066	6.55092	5.12675	2.89348	1.5328	0.0141449	0.741906	up	yes
MSTRG.16236	HHC017302	rna-HHC017302.1	GO:0004568(chitinase activity);GO:0005576(extracellular region);GO:0006032(chitin catabolic process);GO:0008061(chitin binding)	00520(Amino sugar and nucleotide sugar metabolism)	K01183	EC:3.2.1.14	PREDICTED: acidic mammalian chitinase-like [Elaeis guineensis]	NA	58.7703	33.0426	17.914	9.57306	10.2064	10.6745	2.85667	1.51434	0.0141479	0.741906	up	yes
MSTRG.23189	HHC027814	MSTRG.23189.1;rna-HHC027814.1	GO:0005507(copper ion binding);GO:0005576(extracellular region);GO:0005768(endosome);GO:0005773(vacuole);GO:0005794(Golgi apparatus);GO:0005802(trans-Golgi network);GO:0008131(primary amine oxidase activity);GO:0016021(integral component of membrane);GO:0048038(quinone binding);GO:0055114(oxidation-reduction process)	00260(Glycine, serine and threonine metabolism);00350(Tyrosine metabolism);00360(Phenylalanine metabolism);00410(beta-Alanine metabolism);00950(Isoquinoline alkaloid biosynthesis);00960(Tropane, piperidine and pyridine alkaloid biosynthesis)	K00276	EC:1.4.3.21	PREDICTED: primary amine oxidase-like [Musa acuminata subsp. malaccensis]	NA	51.8155	31.6702	6.06833	7.74501	7.53123	5.41035	3.75916	1.91041	0.0141696	0.741906	up	yes
MSTRG.34138	HHC053372	rna-HHC053372.1	GO:0005829(cytosol);GO:0047134(protein-disulfide reductase activity)	NA	NA	NA	thioredoxin-like protein Clot [Phoenix dactylifera]	NA	72.8608	82.6665	31.7039	17.8662	17.2816	19.2476	2.80731	1.48919	0.0141825	0.741906	up	yes
MSTRG.33635	HHC051480	rna-HHC051480.1	GO:0000002(mitochondrial genome maintenance);GO:0003697(single-stranded DNA binding);GO:0005739(mitochondrion);GO:0009507(chloroplast);GO:0045910(negative regulation of DNA recombination);GO:0048046(apoplast)	00010(Glycolysis / Gluconeogenesis);00030(Pentose phosphate pathway);00500(Starch and sucrose metabolism);00520(Amino sugar and nucleotide sugar metabolism)	K01810	EC:5.3.1.9	protein OSB2, chloroplastic-like [Asparagus officinalis]	NA	11.0075	4.05807	2.10628	0.874752	1.10763	0.981011	4.32017	2.11109	0.0142583	0.743305	up	yes
MSTRG.33925	HHC049788	rna-HHC049788.1	GO:0005829(cytosol);GO:0008270(zinc ion binding);GO:0061630(ubiquitin protein ligase activity);GO:0071215(cellular response to abscisic acid stimulus);GO:1902584(positive regulation of response to water deprivation)	NA	NA	NA	uncharacterized protein LOC109849767 [Asparagus officinalis]	NA	21.2468	11.7414	11.2424	4.6364	4.50036	4.95895	2.58301	1.36905	0.0143042	0.743305	up	yes
MSTRG.26083	HHC032127	rna-HHC032127.1	GO:0003824(catalytic activity);GO:0004165(dodecenoyl-CoA delta-isomerase activity);GO:0005737(cytoplasm);GO:0005777(peroxisome);GO:0006635(fatty acid beta-oxidation);GO:0009062(fatty acid catabolic process);GO:0048767(root hair elongation);GO:0080024(indolebutyric acid metabolic process);GO:0080026(response to indolebutyric acid)	00071(Fatty acid degradation);04626(Plant-pathogen interaction)	K18880	EC:5.3.3.8	PREDICTED: enoyl-CoA delta isomerase 2, peroxisomal-like [Musa acuminata subsp. malaccensis]	NA	25.1605	16.9351	14.6061	8.76252	6.87543	6.53399	2.44098	1.28746	0.0143134	0.743305	up	yes
MSTRG.10493	HHC009223	rna-HHC009223.3;rna-HHC009223.4;rna-HHC009223.1;rna-HHC009223.2;rna-HHC009223.5;rna-HHC009223.6	GO:0003677(DNA binding);GO:0005516(calmodulin binding);GO:0005634(nucleus);GO:0006351(transcription, DNA-templated);GO:0006355(regulation of transcription, DNA-templated);GO:0006950(response to stress);GO:0006950(response to stress)	NA	NA	NA	calmodulin-binding protein 60 A-like isoform X2 [Asparagus officinalis]	NA	48.3827	45.3082	10.4258	15.5791	5.31605	14.3216	3.04761	1.60768	0.0143494	0.743305	up	yes
MSTRG.10660	HHC009486	rna-HHC009486.2;rna-HHC009486.1;rna-HHC009486.3	GO:0043161(proteasome-mediated ubiquitin-dependent protein catabolic process);GO:0061630(ubiquitin protein ligase activity);GO:0061630(ubiquitin protein ligase activity)	NA	NA	NA	probable E3 ubiquitin-protein ligase XERICO [Phoenix dactylifera]	NA	11.714	9.81146	4.31217	2.58423	3.02063	1.99368	2.83407	1.50287	0.0143567	0.743305	up	yes
MSTRG.15747	HHC016745	rna-HHC016745.2;rna-HHC016745.1	GO:0004550(nucleoside diphosphate kinase activity);GO:0005622(intracellular);GO:0006163(purine nucleotide metabolic process);GO:0006220(pyrimidine nucleotide metabolic process);GO:0009142(nucleoside triphosphate biosynthetic process);GO:0009142(nucleoside triphosphate biosynthetic process)	00230(Purine metabolism);00240(Pyrimidine metabolism);04016(MAPK signaling pathway - plant);04016(MAPK signaling pathway - plant)	K00940	EC:2.7.4.6	nucleoside diphosphate kinase, partial [Hyacinthus orientalis]	NA	22.4573	11.2433	9.14017	4.40741	4.22295	4.70115	2.64722	1.40448	0.0143679	0.743305	up	yes
MSTRG.10801	HHC009701	rna-HHC009701.1;MSTRG.10801.1	GO:0008194(UDP-glycosyltransferase activity);GO:0009813(flavonoid biosynthetic process);GO:0043231(intracellular membrane-bounded organelle);GO:0052696(flavonoid glucuronidation)	NA	NA	NA	UDP-glycosyltransferase 90A1-like [Phoenix dactylifera]	NA	3.83264	1.18558	1.54598	0.819723	0.343276	0.32113	5.55678	2.47425	0.0143731	0.743305	up	yes
MSTRG.36041	HHC053699	rna-HHC053699.1	GO:0016020(membrane);GO:0016709(oxidoreductase activity, acting on paired donors, with incorporation or reduction of molecular oxygen, NAD(P)H as one donor, and incorporation of one atom of oxygen);GO:0042343(indole glucosinolate metabolic process);GO:0044550(secondary metabolite biosynthetic process);GO:0098542(defense response to other organism)	NA	NA	NA	cytochrome P450 81E8-like [Phoenix dactylifera]	NA	17.8239	4.27282	1.66544	2.32615	1.73268	1.5808	3.93668	1.97698	0.0144091	0.743955	up	yes
MSTRG.8826	HHC006401	rna-HHC006401.1;MSTRG.8826.3;rna-HHC006401.2	GO:0004364(glutathione transferase activity);GO:0005737(cytoplasm);GO:0006749(glutathione metabolic process);GO:0006749(glutathione metabolic process)	00053(Ascorbate and aldarate metabolism);00480(Glutathione metabolism);00480(Glutathione metabolism)	K21888	EC:1.8.5.1;EC:2.5.1.18	glutathione S-transferase DHAR2-like [Asparagus officinalis]	NA	548.086	1199.05	396.466	230.622	209.069	216.652	2.78847	1.47947	0.0144446	0.744576	up	yes
MSTRG.6213	HHC043547	MSTRG.6213.1	NA	NA	NA	NA		NA	6.02924	4.82283	2.26348	1.17161	1.16767	0.623068	3.98918	1.99609	0.0144817	0.744824	up	yes
MSTRG.8517	HHC047094	rna-HHC047094.1	GO:0043161(proteasome-mediated ubiquitin-dependent protein catabolic process);GO:0061630(ubiquitin protein ligase activity)	NA	NA	NA	RING-H2 finger protein ATL73-like [Asparagus officinalis]	NA	5.31371	1.44521	0.279183	0.0899934	0.0001	0.162618	21.9032	4.45307	0.0145181	0.744824	up	yes
MSTRG.32198		MSTRG.32198.1;MSTRG.32198.2	NA	NA	NA	NA		NA	4.37742	7.9718	6.87935	1.36698	16.0165	24.3534	0.255086	-1.97095	0.0145439	0.744824	down	yes
MSTRG.12985	HHC012920	rna-HHC012920.1;MSTRG.12985.1	GO:0005634(nucleus);GO:0005737(cytoplasm);GO:0009507(chloroplast);GO:0016787(hydrolase activity);GO:0016818(hydrolase activity, acting on acid anhydrides, in phosphorus-containing anhydrides);GO:0046872(metal ion binding)	NA	NA	NA	LOW QUALITY PROTEIN: nudix hydrolase 17, mitochondrial-like [Asparagus officinalis]	NA	2.82704	3.55647	60.1637	2.94912	2.35572	2.68673	6.89113	2.78474	0.0145893	0.744824	up	yes
MSTRG.34845	HHC053369	rna-HHC053369.1;MSTRG.34845.1	GO:0003714(transcription corepressor activity);GO:0005634(nucleus);GO:0009611(response to wounding);GO:0031347(regulation of defense response);GO:1903507(negative regulation of nucleic acid-templated transcription);GO:2000022(regulation of jasmonic acid mediated signaling pathway)	04075(Plant hormone signal transduction)	K13464	NA	protein TIFY 3-like [Asparagus officinalis]	NA	26.0194	27.0771	18.1788	8.95148	9.08663	8.06966	2.33812	1.22535	0.0145929	0.744824	up	yes
MSTRG.306	HHC000344	MSTRG.306.1	NA	NA	NA	NA		NA	5.44641	0.0001	5.35389	0.0001	0.0001	0.0001	27001.2	14.7207	0.0146405	0.744824	up	yes
MSTRG.25538		MSTRG.25538.1	NA	NA	NA	NA		NA	12.787	0.276855	0.815301	1.25666	0.264789	0.525556	9.57544	3.25934	0.0146518	0.744824	up	yes
MSTRG.17936	HHC019795	rna-HHC019795.1	GO:0004842(ubiquitin-protein transferase activity);GO:0005634(nucleus);GO:0016567(protein ubiquitination);GO:0061630(ubiquitin protein ligase activity);GO:0070534(protein K63-linked ubiquitination)	03040(Spliceosome);04120(Ubiquitin mediated proteolysis)	K10599	EC:2.3.2.27	pre-mRNA-processing factor 19-like [Asparagus officinalis]	NA	38.0539	25.1154	18.1818	5.77411	6.32063	5.53347	3.6749	1.8777	0.0146524	0.744824	up	yes
MSTRG.392	HHC000449;HHC000451	rna-HHC000449.2;MSTRG.392.4;MSTRG.392.3;MSTRG.392.2;rna-HHC000449.1;rna-HHC000451.1	GO:0005385(zinc ion transmembrane transporter activity);GO:0005886(plasma membrane);GO:0071577(zinc II ion transmembrane transport);GO:0071577(zinc II ion transmembrane transport)	NA	NA	NA	zinc transporter 10 isoform X2 [Phalaenopsis equestris];zinc transporter 7-like [Phoenix dactylifera]	NA	66.9308	7.60593	3.44365	6.07385	4.69009	3.10516	5.39138	2.43065	0.0146605	0.744824	up	yes
MSTRG.28282	HHC035602	MSTRG.28282.1	NA	NA	NA	NA		NA	17.1789	7.71291	9.22716	5.06218	2.06277	2.44062	4.35018	2.12108	0.014738	0.745952	up	yes
MSTRG.5217	HHC042178	rna-HHC042178.1	GO:0003674(molecular_function);GO:0005886(plasma membrane);GO:0008150(biological_process)	03060(Protein export)	K03116	NA	Coiled-coil domain-containing protein, putative [Ricinus communis]	NA	52.0931	49.2693	32.4225	14.0515	13.2042	16.6025	2.47992	1.31029	0.0147869	0.745952	up	yes
MSTRG.25728	HHC031521	MSTRG.25728.1;rna-HHC031521.1	GO:0003674(molecular_function);GO:0005634(nucleus);GO:0005886(plasma membrane);GO:0008150(biological_process)	NA	NA	NA	uncharacterized protein A4U43_C08F24010 [Asparagus officinalis]	NA	5.78211	4.71147	1.93412	1.48033	1.33744	0.628304	3.53759	1.82277	0.0147892	0.745952	up	yes
MSTRG.29625	HHC037505	rna-HHC037505.1	GO:0004842(ubiquitin-protein transferase activity);GO:0005576(extracellular region);GO:0008270(zinc ion binding);GO:0009737(response to abscisic acid);GO:0009814(defense response, incompatible interaction);GO:0009816(defense response to bacterium, incompatible interaction);GO:0010200(response to chitin);GO:0016020(membrane);GO:0016021(integral component of membrane);GO:0016567(protein ubiquitinat…	NA	NA	NA	hypothetical protein BHM03_00060394 [Ensete ventricosum]	NA	41.3512	5.81592	5.81348	0.579058	0.941839	2.16289	8.62548	3.10861	0.0147938	0.745952	up	yes
MSTRG.25332	HHC030803	rna-HHC030803.1;MSTRG.25332.1	GO:0003729(mRNA binding);GO:0003730(mRNA 3'-UTR binding);GO:0005515(protein binding);GO:0005634(nucleus);GO:0005829(cytosol);GO:0006397(mRNA processing)	NA	NA	NA	oligouridylate-binding protein 1-like [Asparagus officinalis]	NA	41.2884	65.8421	30.7756	73.3874	25.9711	22.7647	2.16774	1.11619	0.0148002	0.745952	up	yes
MSTRG.21635		MSTRG.21635.1	NA	NA	NA	NA		NA	7.27851	13.2853	1.89572	1.71673	1.70329	1.35212	3.9563	1.98415	0.0149236	0.750979	up	yes
MSTRG.629	HHC000722	MSTRG.629.1;rna-HHC000722.1	GO:0005634(nucleus);GO:0008270(zinc ion binding);GO:0009555(pollen development);GO:0016021(integral component of membrane)	NA	NA	NA	hypothetical protein B296_00001125 [Ensete ventricosum]	NA	14.0575	6.84393	0.862916	0.861554	0.936409	1.07869	5.61409	2.48905	0.0149794	0.752598	up	yes
MSTRG.1644	HHC002098	rna-HHC002098.1	GO:0005774(vacuolar membrane);GO:0005783(endoplasmic reticulum);GO:0016788(hydrolase activity, acting on ester bonds)	NA	NA	NA	protein STRICTOSIDINE SYNTHASE-LIKE 3-like [Asparagus officinalis]	NA	0.359686	79.6456	3.60708	1.30993	1.50877	1.36653	14.7676	3.88436	0.0150315	0.753045	up	yes
MSTRG.2571	HHC003496	MSTRG.2571.1	NA	NA	NA	NA		NA	0.298548	1.48598	0.0001	0.0331727	3.53368	4.36774	0.11503	-3.11992	0.0150358	0.753045	down	yes
MSTRG.14479		MSTRG.14479.1	NA	NA	NA	NA		NA	119.98	65.2752	81.7217	36.4136	30.8636	33.7294	2.34848	1.23173	0.0151107	0.755608	up	yes
MSTRG.545	HHC000587	rna-HHC000587.1;rna-HHC000587.2	GO:0005886(plasma membrane);GO:0016021(integral component of membrane);GO:0042626(ATPase activity, coupled to transmembrane movement of substances);GO:0042626(ATPase activity, coupled to transmembrane movement of substances)	02010(ABC transporters);02010(ABC transporters)	K05681	NA	PREDICTED: ABC transporter G family member 42-like [Elaeis guineensis];ABC transporter G family member 42-like [Phoenix dactylifera]	NA	5.24315	2.66313	0.600282	0.759583	0.427548	0.556494	4.70821	2.23518	0.0151774	0.75775	up	yes
MSTRG.3803	HHC005634;HHC005633	rna-HHC005634.2;rna-HHC005633.1;rna-HHC005634.1;MSTRG.3803.1	GO:0002181(cytoplasmic translation);GO:0003735(structural constituent of ribosome);GO:0022625(cytosolic large ribosomal subunit);GO:0022625(cytosolic large ribosomal subunit)	03010(Ribosome);03010(Ribosome)	K02891	NA	PREDICTED: 60S ribosomal protein L22-3-like [Musa acuminata subsp. malaccensis];PREDICTED: 60S ribosomal protein L22-2-like [Musa acuminata subsp. malaccensis]	NA	24.1515	19.1266	36.6569	12.4127	11.6683	8.22811	2.32072	1.21457	0.0152163	0.758497	up	yes
MSTRG.28163	HHC035458	rna-HHC035458.1	GO:0003677(DNA binding);GO:0003680(AT DNA binding);GO:0005634(nucleus);GO:0005654(nucleoplasm);GO:0005730(nucleolus);GO:0005737(cytoplasm);GO:0005739(mitochondrion);GO:0006351(transcription, DNA-templated);GO:0006355(regulation of transcription, DNA-templated);GO:0043565(sequence-specific DNA binding);GO:0098687(chromosomal region)	NA	NA	NA	AT-hook motif nuclear-localized protein 1-like [Phoenix dactylifera]	NA	13.3307	4.30623	3.67581	0.973398	1.16325	1.31125	4.50315	2.17093	0.0152695	0.758547	up	yes
MSTRG.20116	HHC022899	rna-HHC022899.1	GO:0003674(molecular_function);GO:1904659(glucose transmembrane transport)	NA	NA	NA	LOW QUALITY PROTEIN: uncharacterized protein LOC109841938 [Asparagus officinalis]	NA	21.518	13.4424	11.8407	6.39684	5.24033	5.58491	2.45712	1.29697	0.0152983	0.758547	up	yes
MSTRG.18323	HHC020489	rna-HHC020489.1	GO:0003674(molecular_function);GO:0005634(nucleus);GO:0008150(biological_process)	NA	NA	NA	PREDICTED: uncharacterized protein LOC104609853 [Nelumbo nucifera]	NA	9.58259	12.3591	7.47246	5.13229	3.31156	3.86604	2.40655	1.26696	0.0153886	0.758547	up	yes
MSTRG.16912	HHC018235	MSTRG.16912.2;rna-HHC018235.1	GO:0004674(protein serine/threonine kinase activity);GO:0005886(plasma membrane);GO:0007166(cell surface receptor signaling pathway)	NA	NA	NA	uncharacterized protein A4U43_C04F21780 [Asparagus officinalis]	NA	8.32828	0.0582498	0.0310485	16.0416	0.283427	0.345152	19.4559	4.28214	0.0153936	0.758547	up	yes
MSTRG.2503		MSTRG.2503.1	NA	NA	NA	NA		NA	14.4514	16.1384	6.57596	20.3476	6.89401	2.91428	2.93188	1.55182	0.015405	0.758547	up	yes
MSTRG.34317	HHC050954;HHC050955	MSTRG.34317.1;rna-HHC050955.1;rna-HHC050954.1	GO:0008150(biological_process);GO:0009507(chloroplast);GO:0009536(plastid);GO:0009941(chloroplast envelope);GO:0016021(integral component of membrane);GO:0031969(chloroplast membrane)	NA	NA	NA	protein FATTY ACID EXPORT 2, chloroplastic [Asparagus officinalis]	NA	18.9818	2.30498	15.1091	0.0001	0.673471	0.0001	27.0172	4.7558	0.0154102	0.758547	up	yes
MSTRG.9661	HHC007695	rna-HHC007695.2;rna-HHC007695.1;rna-HHC007695.3;MSTRG.9661.1	GO:0000495(box H/ACA snoRNA 3'-end processing);GO:0009982(pseudouridine synthase activity);GO:0031118(rRNA pseudouridine synthesis);GO:0031120(snRNA pseudouridine synthesis);GO:0031429(box H/ACA snoRNP complex);GO:1990481(mRNA pseudouridine synthesis);GO:1990481(mRNA pseudouridine synthesis)	03008(Ribosome biogenesis in eukaryotes);03008(Ribosome biogenesis in eukaryotes)	K11131	EC:5.4.99.-	PREDICTED: H/ACA ribonucleoprotein complex subunit 4 [Vitis vinifera];Pseudouridine synthase/archaeosine transglycosylase [Macleaya cordata]	NA	2.70008	0.881492	0.825229	0.470416	0.326668	0.267648	4.10322	2.03676	0.015435	0.758547	up	yes
MSTRG.16933	HHC018260	rna-HHC018260.1;rna-HHC018260.2;rna-HHC018260.3	GO:0004316(3-oxoacyl-[acyl-carrier-protein] reductase (NADPH) activity);GO:0005507(copper ion binding);GO:0006633(fatty acid biosynthetic process);GO:0009507(chloroplast);GO:0009536(plastid);GO:0009570(chloroplast stroma);GO:0009941(chloroplast envelope);GO:0051287(NAD binding);GO:0055114(oxidation-reduction process);GO:0102131(3-oxo-glutaryl-[acp] methyl ester reductase activity);GO:0102132(3-ox…	00061(Fatty acid biosynthesis);01040(Biosynthesis of unsaturated fatty acids);00780(Biotin metabolism);00333(Prodigiosin biosyntheses);00333(Prodigiosin biosyntheses)	K00059	EC:1.1.1.100	3-oxoacyl-[acyl-carrier-protein] reductase 4-like [Asparagus officinalis]	NA	12.1033	6.42707	8.7799	9.40775	3.61812	4.20555	2.3466	1.23057	0.0154376	0.758547	up	yes
MSTRG.8398	HHC046927	rna-HHC046927.1	GO:0005515(protein binding);GO:0005634(nucleus);GO:0005829(cytosol);GO:2000762(regulation of phenylpropanoid metabolic process)	NA	NA	NA	F-box/kelch-repeat protein SKIP20-like [Dendrobium catenatum]	NA	98.9766	43.1513	43.7248	28.9553	21.8407	23.0683	2.39159	1.25797	0.0154573	0.758547	up	yes
MSTRG.12341	HHC011790	rna-HHC011790.1;MSTRG.12341.1	GO:0005737(cytoplasm);GO:0030001(metal ion transport);GO:0046914(transition metal ion binding);GO:0046916(cellular transition metal ion homeostasis)	NA	NA	NA	hypothetical protein AQUCO_00400059v1 [Aquilegia coerulea]	NA	146.166	173.465	70.9541	53.27	44.0238	44.8312	2.49764	1.32056	0.015472	0.758547	up	yes
MSTRG.13596	HHC013842	rna-HHC013842.1	GO:0003677(DNA binding);GO:0003700(DNA binding transcription factor activity);GO:0005634(nucleus);GO:0006351(transcription, DNA-templated);GO:0006355(regulation of transcription, DNA-templated);GO:0044212(transcription regulatory region DNA binding);GO:0046872(metal ion binding);GO:0048364(root development)	NA	NA	NA	hypothetical protein GW17_00032295 [Ensete ventricosum]	NA	17.1936	10.603	9.0322	4.1765	4.46991	3.93571	2.43916	1.28639	0.0154801	0.758547	up	yes
MSTRG.17186	HHC018580	rna-HHC018580.1	GO:0003677(DNA binding);GO:0003700(DNA binding transcription factor activity);GO:0005515(protein binding);GO:0005634(nucleus);GO:0006351(transcription, DNA-templated);GO:0006355(regulation of transcription, DNA-templated);GO:0006952(defense response);GO:0009873(ethylene-activated signaling pathway);GO:0010105(negative regulation of ethylene-activated signaling pathway);GO:0043565(sequence-specifi…	NA	NA	NA	ethylene-responsive transcription factor 3-like [Phalaenopsis equestris]	NA	8.27346	8.68796	7.97158	6.17307	4.64797	2.73397	2.1069	1.07512	0.0155239	0.759521	up	yes
MSTRG.21726	HHC025359	MSTRG.21726.1	NA	NA	NA	NA		NA	1.07613	0.417299	1.00183	0.140581	0.1416	0.138093	4.71203	2.23635	0.0156312	0.762193	up	yes
MSTRG.26248	HHC032416	rna-HHC032416.1	GO:0005739(mitochondrion);GO:0016301(kinase activity);GO:0016310(phosphorylation)	NA	NA	NA	PREDICTED: uncharacterized protein LOC105058604 [Elaeis guineensis]	NA	88.4047	63.6975	53.6448	24.7273	22.2929	24.8003	2.447	1.29101	0.0157023	0.762193	up	yes
MSTRG.6603	HHC044069	rna-HHC044069.1	GO:0005739(mitochondrion);GO:0005747(mitochondrial respiratory chain complex I);GO:0006970(response to osmotic stress);GO:0008137(NADH dehydrogenase (ubiquinone) activity);GO:0009631(cold acclimation);GO:0022900(electron transport chain);GO:0050897(cobalt ion binding)	00190(Oxidative phosphorylation)	K03937	NA	NADH dehydrogenase [ubiquinone] iron-sulfur protein 4, mitochondrial-like [Asparagus officinalis]	NA	29.7283	31.4311	24.943	16.1473	7.48514	14.2636	2.3507	1.23309	0.0157031	0.762193	up	yes
MSTRG.6968	HHC044559	rna-HHC044559.1;MSTRG.6968.1;rna-HHC044559.2	GO:0003677(DNA binding);GO:0003700(DNA binding transcription factor activity);GO:0003899(DNA-directed 5'-3' RNA polymerase activity);GO:0005515(protein binding);GO:0005739(mitochondrion);GO:0006352(DNA-templated transcription, initiation);GO:0006355(regulation of transcription, DNA-templated);GO:0009507(chloroplast);GO:0009553(embryo sac development);GO:0009637(response to blue light);GO:0009658(…	NA	NA	NA	LOW QUALITY PROTEIN: RNA polymerase sigma factor sigE, chloroplastic/mitochondrial-like [Asparagus officinalis];uncharacterized protein A4U43_UnF8330 [Asparagus officinalis]	NA	255.081	77.6094	33.3543	28.8067	29.4408	25.4101	3.59932	1.84772	0.0157201	0.762193	up	yes
MSTRG.16830	HHC018116	MSTRG.16830.5;MSTRG.16830.2;MSTRG.16830.1;MSTRG.16830.3;MSTRG.16830.4;MSTRG.16830.6	NA	NA	NA	NA		NA	1.57309	1.8652	4.7	8.97745	12.5933	12.3508	0.343082	-1.54337	0.0157468	0.762193	down	yes
gene-HHC052980	HHC052980	rna-HHC052980.1	GO:0005634(nucleus);GO:0007165(signal transduction);GO:0035091(phosphatidylinositol binding)	NA	NA	NA	VAN3-binding protein-like [Asparagus officinalis]	NA	0.895296	0.629555	0.660432	0.182697	0.19882	0.0574183	4.62065	2.2081	0.0158563	0.762193	up	yes
MSTRG.32052	HHC054220	MSTRG.32052.2;rna-HHC054220.1	GO:0005886(plasma membrane);GO:0016324(apical plasma membrane);GO:0051819(induction by symbiont of nodulation, tumor or growth in host)	NA	NA	NA	flotillin-like protein 1 [Asparagus officinalis]	NA	225.883	82.2649	33.919	25.6384	24.6791	28.6672	3.4464	1.78509	0.0158759	0.762193	up	yes
MSTRG.14926	HHC015650	rna-HHC015650.1;MSTRG.14926.6;MSTRG.14926.4;rna-HHC015650.3;rna-HHC015650.2;MSTRG.14926.5	GO:0004385(guanylate kinase activity);GO:0005524(ATP binding);GO:0005737(cytoplasm);GO:0005829(cytosol);GO:0009117(nucleotide metabolic process);GO:0016310(phosphorylation);GO:0048229(gametophyte development);GO:0048638(regulation of developmental growth);GO:0048638(regulation of developmental growth)	00230(Purine metabolism);00230(Purine metabolism)	K00942	EC:2.7.4.8	uncharacterized protein A4U43_C08F9820 [Asparagus officinalis]	NA	62.9369	53.8614	6.04542	9.10356	8.61536	8.40543	3.87606	1.95459	0.015884	0.762193	up	yes
MSTRG.12359		MSTRG.12359.1;MSTRG.12359.3;MSTRG.12359.2	NA	NA	NA	NA		NA	267.476	284.496	40.8477	40.6877	40.067	45.6596	3.69493	1.88555	0.0158861	0.762193	up	yes
MSTRG.31558	HHC040304	rna-HHC040304.1	GO:0046658(anchored component of plasma membrane)	NA	NA	NA	basic blue protein-like [Asparagus officinalis]	NA	10.6599	2.84106	0.827057	0.623775	0.458562	0.800952	5.93555	2.56938	0.0158924	0.762193	up	yes
MSTRG.7512	HHC045278	rna-HHC045278.1	GO:0005739(mitochondrion)	NA	NA	NA	uncharacterized protein LOC110108215 isoform X1 [Dendrobium catenatum]	NA	11.2154	9.19183	7.1821	3.31504	3.47816	2.79921	2.46157	1.29958	0.0159456	0.762193	up	yes
MSTRG.8205	HHC046621	rna-HHC046621.1	GO:0009813(flavonoid biosynthetic process);GO:0043231(intracellular membrane-bounded organelle);GO:0052696(flavonoid glucuronidation);GO:0080043(quercetin 3-O-glucosyltransferase activity);GO:0080044(quercetin 7-O-glucosyltransferase activity)	00944(Flavone and flavonol biosynthesis)	K22771	EC:2.4.1.-	UDP-glycosyltransferase 73C5-like [Asparagus officinalis]	NA	15.1638	4.70803	5.17265	1.84765	2.32396	1.55348	3.46777	1.79401	0.0159525	0.762193	up	yes
MSTRG.33993	HHC053908	MSTRG.33993.1;rna-HHC053908.1	GO:0005777(peroxisome);GO:0005782(peroxisomal matrix);GO:0006637(acyl-CoA metabolic process);GO:0030551(cyclic nucleotide binding);GO:0047617(acyl-CoA hydrolase activity)	00062(Fatty acid elongation);01040(Biosynthesis of unsaturated fatty acids)	K01068	EC:3.1.2.2	uncharacterized protein LOC109825086 [Asparagus officinalis]	NA	5.7147	4.71498	12.5505	23.9265	40.0588	36.684	0.30561	-1.71024	0.0159672	0.762193	down	yes
MSTRG.11750	HHC011039	rna-HHC011039.1;MSTRG.11750.1	GO:0004497(monooxygenase activity);GO:0009941(chloroplast envelope);GO:0016125(sterol metabolic process)	00592(alpha-Linolenic acid metabolism)	K10528	EC:4.1.2.-	PREDICTED: probable inactive linolenate hydroperoxide lyase [Elaeis guineensis]	NA	25.923	30.8506	30.5692	13.3279	14.704	2.14046	2.98823	1.57929	0.0159784	0.762193	up	yes
MSTRG.22613		MSTRG.22613.1	NA	NA	NA	NA		NA	10.8929	26.6971	3.3405	5.29357	3.22306	2.9453	3.74688	1.90569	0.0160003	0.762193	up	yes
MSTRG.12317	HHC011769	rna-HHC011769.1	GO:0004664(prephenate dehydratase activity);GO:0009094(L-phenylalanine biosynthetic process);GO:0009507(chloroplast);GO:0009570(chloroplast stroma);GO:0047769(arogenate dehydratase activity)	00400(Phenylalanine, tyrosine and tryptophan biosynthesis)	K05359	EC:4.2.1.91;EC:4.2.1.51	arogenate dehydratase/prephenate dehydratase 6, chloroplastic-like [Dendrobium catenatum]	NA	0.736723	0.599646	0.459508	0.115173	0.0866106	0.101201	5.08768	2.34701	0.0160401	0.762193	up	yes
MSTRG.18006	HHC019915	MSTRG.18006.1;rna-HHC019915.1	GO:0005737(cytoplasm);GO:0043087(regulation of GTPase activity)	NA	NA	NA	PREDICTED: uncharacterized Rho GTPase-activating protein At5g61530 [Elaeis guineensis]	NA	80.5122	28.3609	17.1096	9.55862	8.34174	9.72747	3.75062	1.90713	0.0160522	0.762193	up	yes
MSTRG.13279	HHC013434	rna-HHC013434.1	GO:0003755(peptidyl-prolyl cis-trans isomerase activity);GO:0005528(FK506 binding);GO:0005789(endoplasmic reticulum membrane);GO:0061077(chaperone-mediated protein folding)	NA	NA	NA	peptidyl-prolyl cis-trans isomerase FKBP13, chloroplastic-like [Asparagus officinalis]	NA	79.0507	40.0975	11.4624	11.0794	11.4463	9.39233	3.39969	1.76541	0.0160561	0.762193	up	yes
gene-HHC012403	HHC012403	rna-HHC012403.1	GO:0004553(hydrolase activity, hydrolyzing O-glycosyl compounds);GO:0005576(extracellular region);GO:0005618(cell wall);GO:0010411(xyloglucan metabolic process);GO:0016021(integral component of membrane);GO:0016762(xyloglucan:xyloglucosyl transferase activity);GO:0016798(hydrolase activity, acting on glycosyl bonds);GO:0042546(cell wall biogenesis);GO:0048046(apoplast);GO:0071555(cell wall organi…	NA	NA	NA	probable xyloglucan endotransglucosylase/hydrolase protein 10 [Asparagus officinalis]	NA	2.76555	1.332	0.417552	0.5883	0.272648	0.309347	4.38441	2.13238	0.016086	0.762193	up	yes
MSTRG.23598	HHC028374	rna-HHC028374.1	GO:0009416(response to light stimulus);GO:0009535(chloroplast thylakoid membrane);GO:0009768(photosynthesis, light harvesting in photosystem I);GO:0009941(chloroplast envelope);GO:0010287(plastoglobule);GO:0016168(chlorophyll binding);GO:0031409(pigment binding)	00196(Photosynthesis - antenna proteins)	K08912	NA	chloroplast chlorophyll a/b-binding protein [Ophiopogon japonicus]	NA	10550.3	3889.69	5211.07	1782.51	1904.15	1882.79	2.82994	1.50077	0.0161517	0.762193	up	yes
MSTRG.26945	HHC033466	MSTRG.26945.2;rna-HHC033466.1;MSTRG.26945.1	GO:0005737(cytoplasm);GO:0005829(cytosol);GO:0009117(nucleotide metabolic process);GO:0043530(adenosine 5'-monophosphoramidase activity);GO:0047627(adenylylsulfatase activity);GO:0047710(bis(5'-adenosyl)-triphosphatase activity)	00230(Purine metabolism)	K01522	EC:3.6.1.29	bifunctional bis(5'-adenosyl)-triphosphatase/adenylylsulfatase FHIT [Asparagus officinalis]	NA	8.52649	4.99109	6.39896	2.08777	0.205426	2.33754	4.3265	2.1132	0.0161696	0.762193	up	yes
MSTRG.19920	HHC022644	rna-HHC022644.1	GO:0000398(mRNA splicing, via spliceosome);GO:0005684(U2-type spliceosomal complex);GO:0005686(U2 snRNP);GO:0005689(U12-type spliceosomal complex);GO:0071011(precatalytic spliceosome);GO:0071013(catalytic step 2 spliceosome)	03040(Spliceosome)	K12833	NA	splicing factor 3B subunit 6-like protein [Asparagus officinalis]	NA	3.964	2.79405	3.25182	1.45805	0.821271	1.25763	2.75816	1.46371	0.0161719	0.762193	up	yes
MSTRG.32331	HHC051209	MSTRG.32331.2;rna-HHC051209.1	GO:0016020(membrane);GO:0016709(oxidoreductase activity, acting on paired donors, with incorporation or reduction of molecular oxygen, NAD(P)H as one donor, and incorporation of one atom of oxygen);GO:0044550(secondary metabolite biosynthetic process)	NA	NA	NA	cytochrome P450 71A1-like isoform X1 [Asparagus officinalis]	NA	2.22324	0.610064	0.287058	0.158877	0.106993	0.144214	6.52696	2.70641	0.0161821	0.762193	up	yes
MSTRG.7889	HHC045999	rna-HHC045999.1	GO:0003677(DNA binding);GO:0003700(DNA binding transcription factor activity);GO:0005634(nucleus);GO:0006355(regulation of transcription, DNA-templated)	NA	NA	NA	protein RADIALIS-like 1 [Asparagus officinalis]	NA	12.7203	11.6009	1.88989	2.91656	2.25135	1.92164	3.49001	1.80323	0.0162094	0.762193	up	yes
MSTRG.13799	HHC014097;HHC014096	rna-HHC014097.1;MSTRG.13799.1;MSTRG.13799.3;rna-HHC014096.1	GO:0004601(peroxidase activity);GO:0005737(cytoplasm);GO:0005829(cytosol);GO:0005886(plasma membrane);GO:0009507(chloroplast);GO:0016020(membrane);GO:0016209(antioxidant activity);GO:0045454(cell redox homeostasis);GO:0046686(response to cadmium ion);GO:0051920(peroxiredoxin activity);GO:0055114(oxidation-reduction process);GO:0055114(oxidation-reduction process)	NA	NA	NA	peroxiredoxin-2C-like [Asparagus officinalis]	NA	44.7671	22.0459	17.216	11.5837	7.66943	11.1786	2.5364	1.34279	0.0162639	0.762193	up	yes
MSTRG.14743	HHC015420	rna-HHC015420.1;MSTRG.14743.1	NA	NA	NA	NA		NA	39.7807	30.0854	15.6763	11.8642	10.2721	9.57849	2.45349	1.29484	0.0162641	0.762193	up	yes
MSTRG.24772	HHC029938;HHC029937;HHC029939	MSTRG.24772.2;MSTRG.24772.1;rna-HHC029939.1;rna-HHC029938.1	NA	NA	NA	NA		NA	0.965979	0.508484	1.22254	0.260071	0.150381	0.110724	5.66263	2.50147	0.0162648	0.762193	up	yes
MSTRG.34863	HHC051976	MSTRG.34863.1	NA	NA	NA	NA		NA	14.9842	10.5602	12.8681	5.30193	3.95537	4.54854	2.57025	1.36191	0.0162735	0.762193	up	yes
MSTRG.20196	HHC022990	rna-HHC022990.1	GO:0005515(protein binding);GO:0005634(nucleus);GO:0009740(gibberellic acid mediated signaling pathway);GO:0009845(seed germination);GO:0009939(positive regulation of gibberellic acid mediated signaling pathway);GO:0010162(seed dormancy process);GO:0016567(protein ubiquitination);GO:0019005(SCF ubiquitin ligase complex)	04075(Plant hormone signal transduction)	K14495	NA	F-box protein GID2-like isoform X1 [Phoenix dactylifera]	NA	61.5588	84.2762	44.6206	30.5839	25.2467	23.982	2.24503	1.16673	0.0162746	0.762193	up	yes
MSTRG.2629	HHC003596	rna-HHC003596.1	GO:0005887(integral component of plasma membrane);GO:0015075(ion transmembrane transporter activity)	NA	NA	NA	PREDICTED: UPF0014 membrane protein STAR2 [Elaeis guineensis]	NA	147.898	196.246	27.3091	35.1893	27.8941	34.1815	3.27538	1.71166	0.016339	0.764084	up	yes
MSTRG.3443	HHC005080	rna-HHC005080.1	GO:0003674(molecular_function);GO:0005576(extracellular region);GO:0008150(biological_process)	NA	NA	NA	uncharacterized protein LOC109836329 [Asparagus officinalis]	NA	2.5119	2.05083	2.0921	0.677532	0.408048	0.212676	5.90631	2.56226	0.0164515	0.767607	up	yes
MSTRG.20393	HHC023272	rna-HHC023272.1	GO:0003674(molecular_function);GO:0005739(mitochondrion);GO:0008150(biological_process);GO:0016021(integral component of membrane)	NA	NA	NA	hypothetical protein AQUCO_01800149v1 [Aquilegia coerulea]	NA	0.308222	16.6266	9.34159	2.25466	1.20833	0.704503	7.45781	2.89875	0.0164627	0.767607	up	yes
MSTRG.11674	HHC010935	rna-HHC010935.1	GO:0003677(DNA binding);GO:0003700(DNA binding transcription factor activity);GO:0005515(protein binding);GO:0005634(nucleus);GO:0006351(transcription, DNA-templated);GO:0009873(ethylene-activated signaling pathway);GO:0043565(sequence-specific DNA binding);GO:0045892(negative regulation of transcription, DNA-templated)	NA	NA	NA	AP2/ERF and B3 domain-containing protein [Cinnamomum micranthum f. kanehirae]	NA	8.46376	2.30891	8.76805	0.648634	0.896009	1.48834	4.23373	2.08193	0.0165277	0.769509	up	yes
MSTRG.24469	HHC029528	rna-HHC029528.1;MSTRG.24469.1	GO:0003674(molecular_function);GO:0005886(plasma membrane)	NA	NA	NA	membrane-anchored ubiquitin-fold protein 4 [Asparagus officinalis]	NA	39.3928	32.7389	33.4421	23.7031	13.4647	13.4533	2.40131	1.26382	0.0165683	0.77027	up	yes
MSTRG.3291		MSTRG.3291.1	NA	NA	NA	NA		NA	8.37443	2.66879	0.815163	0.18977	0.172174	0.339283	11.7783	3.55806	0.0166245	0.771753	up	yes
gene-HHC004849	HHC004849	rna-HHC004849.1	GO:0001046(core promoter sequence-specific DNA binding);GO:0001228(transcriptional activator activity, RNA polymerase II transcription regulatory region sequence-specific DNA binding);GO:0005634(nucleus);GO:0006366(transcription by RNA polymerase II)	NA	NA	NA	transcription factor bHLH53-like [Asparagus officinalis]	NA	0.0001	0.0001	0.0001	0.259939	0.742389	0.736559	0.0879813	-3.50666	0.0167455	0.773798	down	yes
MSTRG.31629	HHC040422	rna-HHC040422.1;MSTRG.31629.1	GO:0000139(Golgi membrane);GO:0005509(calcium ion binding);GO:0005794(Golgi apparatus);GO:0005887(integral component of plasma membrane);GO:0006623(protein targeting to vacuole);GO:0015031(protein transport);GO:0016021(integral component of membrane);GO:0017119(Golgi transport complex);GO:0030665(clathrin-coated vesicle membrane);GO:0031902(late endosome membrane)	00941(Flavonoid biosynthesis)	K01859	EC:5.5.1.6	vacuolar-sorting receptor 6-like [Asparagus officinalis]	NA	75.9995	12.0077	1.42501	3.65444	3.29826	3.42719	6.92046	2.79087	0.0167534	0.773798	up	yes
MSTRG.33280	HHC051043	MSTRG.33280.1;rna-HHC051043.1;MSTRG.33280.2	GO:0004252(serine-type endopeptidase activity);GO:0004866(endopeptidase inhibitor activity);GO:0005829(cytosol);GO:0005886(plasma membrane)	NA	NA	NA	subtilisin-like protease SBT3.17 [Asparagus officinalis]	NA	11.712	16.4748	16.4199	9.66275	2.90869	8.27326	2.42665	1.27897	0.0167599	0.773798	up	yes
MSTRG.21152	HHC024543	MSTRG.21152.1;rna-HHC024543.1	GO:0005096(GTPase activator activity);GO:0005515(protein binding);GO:0005737(cytoplasm);GO:0005794(Golgi apparatus);GO:0005829(cytosol);GO:0005886(plasma membrane);GO:0006897(endocytosis);GO:0009733(response to auxin);GO:0009965(leaf morphogenesis);GO:0010051(xylem and phloem pattern formation);GO:0010087(phloem or xylem histogenesis);GO:0016192(vesicle-mediated transport);GO:0030140(trans-Golgi …	04144(Endocytosis)	K12489	NA	PREDICTED: ADP-ribosylation factor GTPase-activating protein AGD3-like isoform X3 [Elaeis guineensis]	NA	53.0184	32.6323	36.5282	23.5331	15.1888	16.6778	2.28628	1.19301	0.0167718	0.773798	up	yes
MSTRG.7696		MSTRG.7696.1	NA	NA	NA	NA		NA	26.5305	27.6832	17.3863	14.9812	6.50759	8.75881	2.83568	1.50369	0.0168135	0.773798	up	yes
MSTRG.11300	HHC010424	rna-HHC010424.1;MSTRG.11300.2	GO:0003674(molecular_function);GO:0005515(protein binding);GO:0005634(nucleus);GO:0009658(chloroplast organization);GO:0010099(regulation of photomorphogenesis);GO:0045893(positive regulation of transcription, DNA-templated);GO:0048512(circadian behavior);GO:0080167(response to karrikin)	NA	NA	NA	uncharacterized protein LOC109842762 [Asparagus officinalis]	NA	19.5616	5.62619	21.2434	4.79603	3.95898	5.1981	2.79713	1.48395	0.0168148	0.773798	up	yes
MSTRG.21983	HHC025751	rna-HHC025751.1	GO:0004601(peroxidase activity);GO:0005576(extracellular region);GO:0005773(vacuole);GO:0005829(cytosol);GO:0006979(response to oxidative stress);GO:0009505(plant-type cell wall);GO:0009809(lignin biosynthetic process);GO:0010228(vegetative to reproductive phase transition of meristem);GO:0020037(heme binding);GO:0042744(hydrogen peroxide catabolic process);GO:0046872(metal ion binding);GO:005511…	00940(Phenylpropanoid biosynthesis)	K00430	EC:1.11.1.7	peroxidase 17 [Ananas comosus]	NA	54.086	49.2171	13.1059	6.92593	8.61643	9.8236	3.34422	1.74167	0.0168834	0.774423	up	yes
MSTRG.10910	HHC009858	rna-HHC009858.1	GO:0003674(molecular_function);GO:0005634(nucleus);GO:0009733(response to auxin)	04075(Plant hormone signal transduction)	K14488	NA	PREDICTED: auxin-induced protein 15A [Elaeis guineensis]	NA	21.5712	17.5136	1.34731	0.753846	1.58062	0.893751	8.32253	3.05702	0.0168972	0.774423	up	yes
MSTRG.28519	HHC035945	MSTRG.28519.2;rna-HHC035945.1	GO:0004359(glutaminase activity);GO:0005829(cytosol);GO:0008614(pyridoxine metabolic process);GO:0042819(vitamin B6 biosynthetic process);GO:0042823(pyridoxal phosphate biosynthetic process);GO:1903600(glutaminase complex)	00750(Vitamin B6 metabolism)	K08681	EC:4.3.3.6	probable pyridoxal 5'-phosphate synthase subunit PDX2 [Asparagus officinalis]	NA	416.087	522.981	335.058	159.485	144.389	159.258	2.36065	1.23919	0.0169016	0.774423	up	yes
MSTRG.16789	HHC018066	rna-HHC018066.1	NA	NA	NA	NA		NA	122.725	151.92	20.5465	19.8168	20.8918	22.1087	3.66284	1.87296	0.0169537	0.775549	up	yes
MSTRG.5071	HHC041936	rna-HHC041936.1;rna-HHC041936.2	GO:0006855(drug transmembrane transport);GO:0006855(drug transmembrane transport)	NA	NA	NA	hypothetical protein AQUCO_00300010v1, partial [Aquilegia coerulea];hypothetical protein AQUCO_00300010v1 [Aquilegia coerulea]	NA	20.1731	117.771	21.9098	10.8396	13.5287	9.35541	3.72951	1.89899	0.0170318	0.775549	up	yes
MSTRG.29073	HHC036694	rna-HHC036694.1	GO:0005634(nucleus);GO:0008150(biological_process);GO:0048046(apoplast)	NA	NA	NA	uncharacterized protein LOC109822931 [Asparagus officinalis]	NA	108.619	36.1726	23.4294	10.8763	12.3544	12.7975	3.56032	1.83201	0.0170377	0.775549	up	yes
MSTRG.33890	HHC051547	MSTRG.33890.2;rna-HHC051547.1	GO:0004674(protein serine/threonine kinase activity);GO:0004842(ubiquitin-protein transferase activity);GO:0005524(ATP binding);GO:0005886(plasma membrane);GO:0006468(protein phosphorylation);GO:0016301(kinase activity);GO:0016567(protein ubiquitination);GO:0046777(protein autophosphorylation)	NA	NA	NA	uncharacterized protein A4U43_C07F21060 [Asparagus officinalis]	NA	115.957	61.6515	18.5521	20.7405	18.1162	17.1571	3.07457	1.62039	0.0170907	0.775549	up	yes
MSTRG.32143	HHC048599	rna-HHC048599.1	GO:0004372(glycine hydroxymethyltransferase activity);GO:0005634(nucleus);GO:0005737(cytoplasm);GO:0006544(glycine metabolic process);GO:0006563(L-serine metabolic process);GO:0019264(glycine biosynthetic process from serine);GO:0030170(pyridoxal phosphate binding);GO:0035999(tetrahydrofolate interconversion);GO:0044030(regulation of DNA methylation);GO:0046500(S-adenosylmethionine metabolic proc…	00630(Glyoxylate and dicarboxylate metabolism);00260(Glycine, serine and threonine metabolism);00460(Cyanoamino acid metabolism);00670(One carbon pool by folate)	K00600	EC:2.1.2.1	serine hydroxymethyltransferase 7 isoform X1 [Asparagus officinalis]	NA	40.5053	109.112	63.6147	19.4703	19.6987	24.3038	2.64419	1.40282	0.0170927	0.775549	up	yes
MSTRG.10406	HHC009078	rna-HHC009078.1	NA	04016(MAPK signaling pathway - plant)	K20725	NA	PREDICTED: uncharacterized protein LOC103995088 [Musa acuminata subsp. malaccensis]	NA	15.0735	8.25343	5.00915	2.76097	3.00067	2.54892	2.80174	1.48632	0.0171048	0.775549	up	yes
MSTRG.18667	HHC020899	rna-HHC020899.1;MSTRG.18667.1	GO:0005524(ATP binding);GO:0005777(peroxisome);GO:0008152(metabolic process);GO:0009507(chloroplast);GO:0009611(response to wounding);GO:0009695(jasmonic acid biosynthetic process);GO:0009698(phenylpropanoid metabolic process);GO:0016021(integral component of membrane);GO:0016207(4-coumarate-CoA ligase activity);GO:0016874(ligase activity)	00592(alpha-Linolenic acid metabolism)	K10526	EC:6.2.1.-	PREDICTED: LOW QUALITY PROTEIN: 4-coumarate--CoA ligase-like 4 [Elaeis guineensis]	NA	52.4304	16.0432	6.95123	6.70479	5.67794	6.18701	3.46102	1.7912	0.0171121	0.775549	up	yes
MSTRG.27504	HHC034491	MSTRG.27504.2;rna-HHC034491.1	GO:0000786(nucleosome);GO:0003677(DNA binding);GO:0005634(nucleus);GO:0005794(Golgi apparatus);GO:0005829(cytosol);GO:0006334(nucleosome assembly);GO:0051276(chromosome organization)	NA	NA	NA	hypothetical protein C5167_005724 [Papaver somniferum]	NA	5.85451	4.90166	4.71786	1.05005	0.865332	1.04644	4.32166	2.11159	0.0171215	0.775549	up	yes
MSTRG.8768	HHC006336	rna-HHC006336.1	NA	NA	NA	NA	metallothionein type 2, partial [Typha angustifolia]	NA	165.648	361.892	145.436	64.0782	70.3024	66.9365	2.6853	1.42508	0.0172115	0.776543	up	yes
MSTRG.7930	HHC046097	rna-HHC046097.1	NA	NA	NA	NA		NA	58.354	68.2087	15.2829	13.024	12.7599	13.0433	3.00097	1.58543	0.0172147	0.776543	up	yes
MSTRG.28317	HHC035637	MSTRG.28317.1	NA	NA	NA	NA		NA	14.5543	12.3101	9.57072	4.69472	3.42111	2.91305	3.24666	1.69896	0.0172168	0.776543	up	yes
MSTRG.22589		MSTRG.22589.1;MSTRG.22589.2	NA	NA	NA	NA		NA	1.7893	0.908946	2.41226	2.58417	6.02236	6.60872	0.304593	-1.71505	0.0173034	0.777957	down	yes
MSTRG.18429		MSTRG.18429.1	NA	NA	NA	NA		NA	45.019	64.0419	7.3092	8.96683	6.84231	8.49573	4.08582	2.03063	0.0173376	0.777957	up	yes
MSTRG.34485	HHC049350	rna-HHC049350.1;MSTRG.34485.2	GO:0005515(protein binding);GO:0005737(cytoplasm);GO:0009507(chloroplast);GO:0043424(protein histidine kinase binding);GO:0045087(innate immune response);GO:1905037(autophagosome organization)	NA	NA	NA	PREDICTED: MATH domain-containing protein At5g43560-like isoform X2 [Elaeis guineensis]	NA	47.0632	2.25042	3.30201	3.60268	1.88928	2.35268	6.62646	2.72824	0.0173462	0.777957	up	yes
MSTRG.9067	HHC006707	rna-HHC006707.1;MSTRG.9067.1;MSTRG.9067.2	GO:0003677(DNA binding);GO:0005516(calmodulin binding);GO:0005634(nucleus);GO:0006351(transcription, DNA-templated);GO:0006355(regulation of transcription, DNA-templated);GO:0006950(response to stress)	NA	NA	NA	uncharacterized protein A4U43_C05F1420 [Asparagus officinalis]	NA	105.351	50.5971	43.3373	32.2427	25.4492	21.6315	2.45885	1.29798	0.0173799	0.777957	up	yes
MSTRG.30389	HHC038741	rna-HHC038741.1	GO:0016298(lipase activity)	00561(Glycerolipid metabolism)	K00679	EC:2.3.1.158	GDSL esterase/lipase At5g45670-like [Asparagus officinalis]	NA	22.6256	25.7842	5.51698	4.61803	3.73792	5.43363	3.19166	1.67431	0.0173821	0.777957	up	yes
MSTRG.5709	HHC042833	rna-HHC042833.1;rna-HHC042833.2	GO:0003677(DNA binding);GO:0003680(AT DNA binding);GO:0005634(nucleus);GO:0005654(nucleoplasm);GO:0005730(nucleolus);GO:0005737(cytoplasm);GO:0005739(mitochondrion);GO:0006351(transcription, DNA-templated);GO:0006355(regulation of transcription, DNA-templated);GO:0043565(sequence-specific DNA binding);GO:0098687(chromosomal region);GO:0098687(chromosomal region)	NA	NA	NA	AT-hook motif nuclear-localized protein 1-like [Phoenix dactylifera]	NA	55.8657	50.8596	30.8786	14.1188	14.363	14.7152	2.60888	1.38343	0.0174397	0.777957	up	yes
gene-HHC048956	HHC048956	rna-HHC048956.1	GO:0005680(anaphase-promoting complex);GO:0031625(ubiquitin protein ligase binding);GO:0061630(ubiquitin protein ligase activity)	04120(Ubiquitin mediated proteolysis)	K03349	NA	anaphase-promoting complex subunit 2 [Asparagus officinalis]	NA	0.341345	0.121965	0.609742	0.196985	0.037934	0.0665365	6.07845	2.6037	0.0174757	0.777957	up	yes
MSTRG.35862	HHC052387	MSTRG.35862.1;rna-HHC052387.1	NA	NA	NA	NA	photosystem II 5 kDa protein, chloroplastic-like [Phoenix dactylifera]	NA	1260.76	1169.86	1308.25	507.446	464.968	460.548	2.29403	1.19788	0.0175354	0.777957	up	yes
MSTRG.2308	HHC003093	rna-HHC003093.1	NA	NA	NA	NA		NA	136.978	1263.93	2676.18	243.101	233.421	237.304	4.58886	2.19814	0.0175494	0.777957	up	yes
MSTRG.18647	HHC020877	rna-HHC020877.1	GO:0003674(molecular_function);GO:0005739(mitochondrion);GO:0006979(response to oxidative stress);GO:0016021(integral component of membrane)	NA	NA	NA	PREDICTED: uncharacterized protein LOC103983044 [Musa acuminata subsp. malaccensis]	NA	35.4382	38.0676	10.0081	6.91176	5.6164	9.33568	3.02385	1.59639	0.0175648	0.777957	up	yes
MSTRG.9730	HHC007858	rna-HHC007858.2;MSTRG.9730.2;rna-HHC007858.1	GO:0004477(methenyltetrahydrofolate cyclohydrolase activity);GO:0004488(methylenetetrahydrofolate dehydrogenase (NADP+) activity);GO:0005829(cytosol);GO:0006730(one-carbon metabolic process);GO:0006730(one-carbon metabolic process)	NA	NA	NA	Cold shock domain-containing protein 4 [Zostera marina]	NA	17.0244	7.81558	14.5521	4.21152	4.54883	4.17384	2.49944	1.3216	0.0176269	0.777957	up	yes
MSTRG.14979	HHC015720	MSTRG.14979.1;rna-HHC015720.1	GO:0005525(GTP binding);GO:0005737(cytoplasm);GO:0009507(chloroplast);GO:0043022(ribosome binding)	NA	NA	NA	uncharacterized protein LOC109819869 isoform X1 [Asparagus officinalis]	NA	50.5611	10.5423	24.4774	6.81931	5.9394	7.49129	3.43988	1.78236	0.0176441	0.777957	up	yes
MSTRG.4999	HHC041823	rna-HHC041823.1	GO:0004864(protein phosphatase inhibitor activity);GO:0005634(nucleus);GO:0005737(cytoplasm);GO:0009738(abscisic acid-activated signaling pathway);GO:0010427(abscisic acid binding);GO:0080163(regulation of protein serine/threonine phosphatase activity)	NA	NA	NA	pathogenesis-related protein 1-like [Phoenix dactylifera]	NA	1297.02	99.4824	24.0404	38.4705	43.1938	43.5049	8.41427	3.07284	0.01766	0.777957	up	yes
MSTRG.34446	HHC049305	rna-HHC049305.1	GO:0005524(ATP binding);GO:0005739(mitochondrion);GO:0005783(endoplasmic reticulum);GO:0005886(plasma membrane);GO:0009409(response to cold);GO:0009414(response to water deprivation);GO:0009651(response to salt stress);GO:0009737(response to abscisic acid);GO:0010154(fruit development);GO:0010431(seed maturation);GO:0016021(integral component of membrane);GO:0016887(ATPase activity);GO:0031966(mi…	NA	NA	NA	ATP binding protein [Ornithogalum saundersiae]	NA	123.43	67.8928	16.8893	21.7706	18.5923	18.2046	3.12503	1.64387	0.0176686	0.777957	up	yes
MSTRG.10403	HHC009073	rna-HHC009073.1	GO:0005886(plasma membrane);GO:0010375(stomatal complex patterning)	NA	NA	NA	Uncharacterized protein AXF42_Ash007437 [Apostasia shenzhenica]	NA	3.52801	1.15841	0.202039	0.260036	0.294176	0.13711	5.96876	2.57743	0.0176801	0.777957	up	yes
MSTRG.2328		MSTRG.2328.1	NA	NA	NA	NA		NA	0.309589	0.684957	0.985208	0.793052	2.76087	2.98475	0.241297	-2.05112	0.0176901	0.777957	down	yes
MSTRG.5009	HHC041836	rna-HHC041836.1;MSTRG.5009.3;MSTRG.5009.2	GO:0005737(cytoplasm);GO:0030001(metal ion transport);GO:0046914(transition metal ion binding);GO:0046916(cellular transition metal ion homeostasis)	NA	NA	NA	heavy metal-associated isoprenylated plant protein 5-like [Phoenix dactylifera]	NA	18.2248	10.9462	2.91694	3.27626	3.34864	2.32812	3.11483	1.63915	0.0176961	0.777957	up	yes
MSTRG.20677	HHC023680	MSTRG.20677.2;MSTRG.20677.1;rna-HHC023680.1	GO:0000347(THO complex);GO:0003723(RNA binding);GO:0005622(intracellular);GO:0005634(nucleus);GO:0006397(mRNA processing);GO:0006406(mRNA export from nucleus);GO:0008380(RNA splicing);GO:0009873(ethylene-activated signaling pathway);GO:0010267(production of ta-siRNAs involved in RNA interference);GO:0031047(gene silencing by RNA);GO:0050832(defense response to fungus)	03040(Spliceosome);03013(RNA transport)	K12878	NA	THO complex subunit 1 isoform X2 [Asparagus officinalis]	NA	27.4119	7.64463	26.2626	39.814	8.89558	11.0639	2.53346	1.34111	0.0177099	0.777957	up	yes
MSTRG.10584		MSTRG.10584.1	NA	NA	NA	NA		NA	33.3292	5.16309	0.0001	0.0001	0.0001	0.148349	129.649	7.01847	0.0177239	0.777957	up	yes
MSTRG.210	HHC000257;HHC000258	rna-HHC000257.2;rna-HHC000258.1;rna-HHC000257.1;MSTRG.210.3	GO:0005887(integral component of plasma membrane);GO:0008509(anion transmembrane transporter activity);GO:0051453(regulation of intracellular pH);GO:0098656(anion transmembrane transport);GO:0098656(anion transmembrane transport)	NA	NA	NA	boron transporter 4-like [Asparagus officinalis]	NA	71.0601	14.3729	2.45901	3.2701	1.93475	4.47717	7.1088	2.82961	0.0177608	0.777957	up	yes
MSTRG.24496	HHC029561	MSTRG.24496.1	NA	NA	NA	NA		NA	1.87737	3.58766	0.206573	4.58536	8.22403	14.2822	0.22787	-2.13372	0.0177815	0.777957	down	yes
MSTRG.32739	HHC048484	rna-HHC048484.1;MSTRG.32739.2	GO:0004674(protein serine/threonine kinase activity);GO:0005634(nucleus);GO:0005737(cytoplasm);GO:0005829(cytosol);GO:0005956(protein kinase CK2 complex);GO:0007623(circadian rhythm);GO:0016301(kinase activity);GO:0016310(phosphorylation);GO:0019887(protein kinase regulator activity);GO:0042753(positive regulation of circadian rhythm);GO:0048573(photoperiodism, flowering)	03008(Ribosome biogenesis in eukaryotes);04712(Circadian rhythm - plant)	K03115	NA	putative casein kinase II subunit beta-4 isoform X1 [Asparagus officinalis]	NA	2.38144	3.21275	0.491827	3.09889	0.467801	0.922093	3.30418	1.72429	0.0178063	0.777957	up	yes
MSTRG.3613	HHC005378	rna-HHC005378.1;rna-HHC005378.2;MSTRG.3613.3	GO:0005829(cytosol);GO:0006979(response to oxidative stress);GO:0009507(chloroplast);GO:0030091(protein repair);GO:0033743(peptide-methionine (R)-S-oxide reductase activity);GO:0046872(metal ion binding);GO:0055114(oxidation-reduction process);GO:0009570(chloroplast stroma);GO:0009570(chloroplast stroma)	NA	NA	NA	peptide methionine sulfoxide reductase B5-like [Asparagus officinalis];peptide methionine sulfoxide reductase B5-like isoform X2 [Phoenix dactylifera]	NA	24.3232	36.2432	23.4964	11.13	10.3278	10.2722	2.3105	1.20821	0.0178117	0.777957	up	yes
MSTRG.12362	HHC011817	rna-HHC011817.1	NA	NA	NA	NA		NA	1460.41	2425.51	368.137	343.246	334.272	354.388	3.33786	1.73892	0.017941	0.78253	up	yes
MSTRG.19430	HHC021939	rna-HHC021939.1	GO:0009507(chloroplast);GO:0016491(oxidoreductase activity);GO:0055114(oxidation-reduction process)	00061(Fatty acid biosynthesis);01040(Biosynthesis of unsaturated fatty acids);00780(Biotin metabolism);00333(Prodigiosin biosyntheses)	K00059	EC:1.1.1.100	short-chain type dehydrogenase/reductase-like [Asparagus officinalis]	NA	9.33348	3.19658	8.47552	0.877816	1.26888	1.17598	4.47537	2.16201	0.0179788	0.782876	up	yes
MSTRG.9307	HHC007030	rna-HHC007030.1;MSTRG.9307.2	GO:0009536(plastid)	00190(Oxidative phosphorylation)	K05579	EC:1.6.5.3	putative ribosomal protein S15 [Helianthus annuus]	NA	18.9887	0.674075	0.377414	1.75022	0.162893	0.901496	10.2361	3.3556	0.0179983	0.782876	up	yes
MSTRG.9023	HHC006653	rna-HHC006653.1;rna-HHC006653.2	GO:0004478(methionine adenosyltransferase activity);GO:0005829(cytosol);GO:0005829(cytosol)	00270(Cysteine and methionine metabolism);00270(Cysteine and methionine metabolism)	K00789	EC:2.5.1.6	S-adenosylmethionine synthetase [Lycoris radiata]	NA	628.903	1313.67	2150.9	370.639	401.385	381.688	2.85038	1.51116	0.0180623	0.784586	up	yes
MSTRG.5956	HHC043195	rna-HHC043195.1	GO:0004672(protein kinase activity);GO:0005524(ATP binding);GO:0005886(plasma membrane);GO:0006468(protein phosphorylation);GO:0009507(chloroplast)	NA	NA	NA	uncharacterized protein LOC109851256 [Asparagus officinalis]	NA	11.6455	2.58892	1.59323	1.04321	0.917779	1.03739	4.31445	2.10918	0.0180986	0.785087	up	yes
MSTRG.1315	HHC001659	MSTRG.1315.1;rna-HHC001659.1	GO:0005886(plasma membrane);GO:0016301(kinase activity);GO:0016310(phosphorylation)	NA	NA	NA	receptor protein kinase TMK1 [Asparagus officinalis]	NA	5.81814	4.36927	0.703354	0.82512	0.835382	0.188102	5.72353	2.51691	0.0181605	0.786698	up	yes
MSTRG.16538	HHC017726	rna-HHC017726.1	NA	NA	NA	NA		NA	134.104	68.0313	63.1011	28.2439	29.7314	28.2694	2.52997	1.33912	0.0181904	0.786919	up	yes
MSTRG.21819	HHC025485	rna-HHC025485.1	GO:0034605(cellular response to heat)	NA	NA	NA	chaperone protein ClpB1 [Morus notabilis]	NA	4.56649	7.65814	5.88387	20.3447	36.2975	24.3798	0.316866	-1.65805	0.0183853	0.79427	down	yes
MSTRG.20990	HHC024219	MSTRG.20990.1	NA	NA	NA	NA		NA	0.0893078	0.830268	0.426664	0.0504561	0.0180751	0.0664613	8.26092	3.0463	0.0184142	0.794437	up	yes
MSTRG.19892	HHC022595	rna-HHC022595.1	NA	NA	NA	NA	uncharacterized protein LOC109718247 [Ananas comosus]	NA	28.4584	20.8318	6.62905	4.06295	5.63225	4.31025	3.01646	1.59285	0.0184571	0.79521	up	yes
MSTRG.29292		MSTRG.29292.1	NA	NA	NA	NA		NA	2.93046	29.5211	30.7024	2.69955	3.3406	3.53394	4.78967	2.25993	0.0185964	0.800125	up	yes
MSTRG.2155	HHC002852	rna-HHC002852.1	GO:0005515(protein binding);GO:0005840(ribosome);GO:0006508(proteolysis);GO:0008233(peptidase activity);GO:0009570(chloroplast stroma);GO:0030163(protein catabolic process)	NA	NA	NA	ATP-dependent Clp protease adapter protein CLPS1, chloroplastic [Asparagus officinalis]	NA	32.9287	21.125	11.5648	5.85454	4.11497	8.49157	2.83476	1.50323	0.0186279	0.800304	up	yes
MSTRG.22355	HHC026495	rna-HHC026495.1;MSTRG.22355.1	NA	NA	NA	NA	hypothetical protein OsI_30264 [Oryza sativa Indica Group]	NA	3.02901	2.29515	1.20472	1.75695	0.859404	0.43179	3.20859	1.68194	0.0186565	0.800304	up	yes
MSTRG.22497	HHC026759	rna-HHC026759.1	GO:0004674(protein serine/threonine kinase activity);GO:0005524(ATP binding);GO:0005886(plasma membrane);GO:0006468(protein phosphorylation);GO:0009751(response to salicylic acid);GO:0016021(integral component of membrane);GO:0016301(kinase activity);GO:0030246(carbohydrate binding)	NA	NA	NA	PREDICTED: L-type lectin-domain containing receptor kinase IV.1-like [Elaeis guineensis]	NA	75.31	22.6527	12.8216	7.1075	8.58297	7.82972	3.59148	1.84458	0.0186762	0.800304	up	yes
MSTRG.34135	HHC051453	rna-HHC051453.1	GO:0009813(flavonoid biosynthetic process);GO:0043231(intracellular membrane-bounded organelle);GO:0052696(flavonoid glucuronidation);GO:0080043(quercetin 3-O-glucosyltransferase activity);GO:0080044(quercetin 7-O-glucosyltransferase activity)	00942(Anthocyanin biosynthesis)	K12938	EC:2.4.1.-	PREDICTED: UDP-glycosyltransferase 88A1-like [Elaeis guineensis]	NA	89.5085	30.5032	21.2213	12.5382	14.6435	11.1859	2.97668	1.5737	0.0187838	0.803277	up	yes
MSTRG.3628	HHC005408	rna-HHC005408.1	GO:0000790(nuclear chromatin);GO:0003677(DNA binding);GO:0006342(chromatin silencing)	NA	NA	NA	histone H2AX [Asparagus officinalis]	NA	7.45585	17.5139	6.02918	6.16	3.31415	2.90602	2.98697	1.57868	0.0187987	0.803277	up	yes
MSTRG.32543		MSTRG.32543.1	NA	NA	NA	NA		NA	86.8035	51.4648	27.0717	26.6496	13.5892	22.6089	2.65193	1.40705	0.0188456	0.803277	up	yes
MSTRG.11435	HHC010626	MSTRG.11435.1;rna-HHC010626.1	GO:0003677(DNA binding);GO:0003700(DNA binding transcription factor activity);GO:0005515(protein binding);GO:0005634(nucleus);GO:0006351(transcription, DNA-templated);GO:0006355(regulation of transcription, DNA-templated);GO:0042803(protein homodimerization activity);GO:0046872(metal ion binding);GO:0048574(long-day photoperiodism, flowering)	NA	NA	NA	Homeobox domain [Macleaya cordata]	NA	50.5811	53.6194	24.5822	20.6065	22.784	5.10218	2.67855	1.42145	0.018867	0.803277	up	yes
MSTRG.32650	HHC048556	rna-HHC048556.1	NA	NA	NA	NA	uncharacterized protein LOC103716287 [Phoenix dactylifera]	NA	10.9427	18.1974	3.21175	2.01396	2.1774	1.90131	4.21283	2.07479	0.0188721	0.803277	up	yes
MSTRG.29839		MSTRG.29839.1	NA	NA	NA	NA		NA	0.575644	1.20621	0.728669	2.34374	3.55793	5.1719	0.278028	-1.8467	0.0189081	0.803732	down	yes
MSTRG.29020	HHC036617;HHC036618;HHC036619	MSTRG.29020.7;MSTRG.29020.4;rna-HHC036617.1;rna-HHC036618.1;MSTRG.29020.1;MSTRG.29020.12;MSTRG.29020.9;MSTRG.29020.2;rna-HHC036619.1;MSTRG.29020.6;MSTRG.29020.15;MSTRG.29020.10;MSTRG.29020.3;MSTRG.29020.14;MSTRG.29020.16;MSTRG.29020.8;MSTRG.29020.13;MSTRG.29020.5	GO:0005351(carbohydrate:proton symporter activity);GO:0005355(glucose transmembrane transporter activity);GO:0005887(integral component of plasma membrane);GO:0046323(glucose import);GO:0046323(glucose import)	NA	NA	NA	PREDICTED: polyol transporter 5-like [Musa acuminata subsp. malaccensis]	NA	223.036	96.7047	48.0901	36.2676	35.5042	33.1903	2.94127	1.55644	0.018947	0.80431	up	yes
MSTRG.657	HHC000766	rna-HHC000766.1	GO:0003824(catalytic activity);GO:0005737(cytoplasm)	NA	NA	NA	probable inactive nicotinamidase At3g16190 isoform X1 [Asparagus officinalis]	NA	16.7953	20.8955	8.08736	7.61525	5.33886	5.9475	2.3654	1.24208	0.0190094	0.804329	up	yes
MSTRG.20358		MSTRG.20358.1	NA	NA	NA	NA		NA	5.92531	1.21222	0.115869	0.0802447	0.0817147	0.252711	10.9645	3.45477	0.019021	0.804329	up	yes
MSTRG.10646	HHC009460	rna-HHC009460.2;rna-HHC009460.1	GO:0005515(protein binding);GO:0005737(cytoplasm);GO:0031463(Cul3-RING ubiquitin ligase complex);GO:0043161(proteasome-mediated ubiquitin-dependent protein catabolic process);GO:0043161(proteasome-mediated ubiquitin-dependent protein catabolic process)	NA	NA	NA	BTB/POZ domain-containing protein At1g55760 isoform X2 [Phoenix dactylifera]	NA	6.99247	4.85137	3.71777	2.14347	1.99722	1.71827	2.38261	1.25254	0.0190253	0.804329	up	yes
MSTRG.25441	HHC030986	rna-HHC030986.1	GO:0003676(nucleic acid binding);GO:0003700(DNA binding transcription factor activity);GO:0005515(protein binding);GO:0005634(nucleus);GO:0006351(transcription, DNA-templated);GO:0006355(regulation of transcription, DNA-templated);GO:0007275(multicellular organism development);GO:0008270(zinc ion binding);GO:0009736(cytokinin-activated signaling pathway);GO:0009738(abscisic acid-activated signali…	NA	NA	NA	Zinc finger protein 8 isoform B [Glycine soja]	NA	4.36942	2.10317	0.69184	1.23067	0.582911	0.151644	5.71442	2.51461	0.0190631	0.804329	up	yes
gene-HHC014510	HHC014510	rna-HHC014510.1	GO:0005634(nucleus);GO:0010088(phloem development);GO:0042803(protein homodimerization activity);GO:0043621(protein self-association)	NA	NA	NA	protein SIEVE ELEMENT OCCLUSION B [Asparagus officinalis]	NA	0.175486	0.0875337	0.587087	1.6406	2.43981	3.21405	0.220266	-2.18268	0.0191543	0.804329	down	yes
MSTRG.2369	HHC003191;HHC003192;HHC003186	MSTRG.2369.1;rna-HHC003192.1;rna-HHC003186.1	GO:0005515(protein binding);GO:0005516(calmodulin binding);GO:0005634(nucleus);GO:0009414(response to water deprivation);GO:0009651(response to salt stress);GO:0010337(regulation of salicylic acid metabolic process);GO:0010337(regulation of salicylic acid metabolic process)	NA	NA	NA	calmodulin-binding protein 25-like [Dendrobium catenatum]	NA	14.6567	13.3105	163.686	11.6133	10.508	10.5808	4.81929	2.26882	0.019178	0.804329	up	yes
MSTRG.21069	HHC024353	rna-HHC024353.1;MSTRG.21069.2	GO:0003824(catalytic activity);GO:0003962(cystathionine gamma-synthase activity);GO:0004123(cystathionine gamma-lyase activity);GO:0005737(cytoplasm);GO:0005829(cytosol);GO:0006520(cellular amino acid metabolic process);GO:0009970(cellular response to sulfate starvation);GO:0018826(methionine gamma-lyase activity);GO:0019343(cysteine biosynthetic process via cystathionine);GO:0019346(transsulfura…	00270(Cysteine and methionine metabolism);00450(Selenocompound metabolism)	K01761	EC:4.4.1.11	PREDICTED: methionine gamma-lyase-like [Musa acuminata subsp. malaccensis]	NA	119.871	90.3865	161.568	48.9978	46.2733	43.9861	2.33119	1.22107	0.0191952	0.804329	up	yes
MSTRG.4320	HHC040646	rna-HHC040646.1	GO:0043161(proteasome-mediated ubiquitin-dependent protein catabolic process);GO:0061630(ubiquitin protein ligase activity)	NA	NA	NA	RING-H2 finger protein ATL56-like isoform X6 [Phoenix dactylifera]	NA	37.2945	28.3779	22.2662	13.9615	12.6917	9.60084	2.28552	1.19252	0.019209	0.804329	up	yes
MSTRG.13459	HHC013645	rna-HHC013645.1	GO:0009813(flavonoid biosynthetic process);GO:0043231(intracellular membrane-bounded organelle);GO:0052696(flavonoid glucuronidation);GO:0080043(quercetin 3-O-glucosyltransferase activity);GO:0080044(quercetin 7-O-glucosyltransferase activity)	NA	NA	NA	LOW QUALITY PROTEIN: UDP-glycosyltransferase 71A15-like [Asparagus officinalis]	NA	56.1809	18.4611	5.40909	5.81963	5.29302	6.31632	3.69834	1.88688	0.01921	0.804329	up	yes
MSTRG.5898		MSTRG.5898.1	NA	NA	NA	NA		NA	0.048954	0.206282	0.0001	0.331673	0.884799	0.939299	0.160904	-2.63573	0.0192124	0.804329	down	yes
MSTRG.12360	HHC011815	MSTRG.12360.2;MSTRG.12360.1;rna-HHC011815.1	NA	NA	NA	NA		NA	768.35	645.4	71.2679	102.822	101.325	104.29	3.86119	1.94905	0.0192545	0.804329	up	yes
MSTRG.27253	HHC034083	rna-HHC034083.1	GO:0005739(mitochondrion);GO:0006400(tRNA modification);GO:0052381(tRNA dimethylallyltransferase activity)	00908(Zeatin biosynthesis)	K10760	EC:2.5.1.27;EC:2.5.1.112	adenylate isopentenyltransferase 5, chloroplastic-like [Asparagus officinalis]	NA	23.8565	19.4367	3.04009	2.83447	3.64728	3.2716	3.55316	1.8291	0.0192779	0.804329	up	yes
MSTRG.35358	HHC050461	rna-HHC050461.1	GO:0000103(sulfate assimilation);GO:0006457(protein folding);GO:0009507(chloroplast);GO:0015035(protein disulfide oxidoreductase activity);GO:0016671(oxidoreductase activity, acting on a sulfur group of donors, disulfide as acceptor);GO:0034599(cellular response to oxidative stress);GO:0045454(cell redox homeostasis);GO:0055114(oxidation-reduction process)	NA	NA	NA	thioredoxin M-type, chloroplastic-like [Asparagus officinalis]	NA	337.333	258.927	215.394	145.179	109.751	110.797	2.16921	1.11717	0.0192968	0.804329	up	yes
MSTRG.15097	HHC015850;HHC015849;HHC015851	MSTRG.15097.1;MSTRG.15097.2;MSTRG.15097.3;MSTRG.15097.5;MSTRG.15097.4	NA	NA	NA	NA		NA	0.287828	0.45335	17.5607	0.738389	0.494249	0.494008	9.63328	3.26803	0.0193351	0.804329	up	yes
MSTRG.15753	HHC016661	MSTRG.15753.2;MSTRG.15753.1	NA	NA	NA	NA		NA	2.91756	1.73022	0.726519	0.69879	0.451494	0.279807	4.15225	2.05389	0.0193561	0.804329	up	yes
gene-HHC027615	HHC027615	rna-HHC027615.1	GO:0003824(catalytic activity);GO:0005634(nucleus);GO:0005737(cytoplasm);GO:0005829(cytosol);GO:0009226(nucleotide-sugar biosynthetic process);GO:0048040(UDP-glucuronate decarboxylase activity);GO:0048046(apoplast);GO:0050662(coenzyme binding);GO:0071555(cell wall organization)	00520(Amino sugar and nucleotide sugar metabolism)	K12449	NA	UDP-D-apiose/UDP-D-xylose synthase [Ornithogalum longebracteatum]	NA	0.0001	0.164155	0.0001	0.226556	0.647991	0.890514	0.127043	-2.97662	0.0193675	0.804329	down	yes
MSTRG.35133	HHC051747	rna-HHC051747.1	GO:0005634(nucleus);GO:0006355(regulation of transcription, DNA-templated);GO:0009640(photomorphogenesis)	NA	NA	NA	LOW QUALITY PROTEIN: B-box zinc finger protein 24-like [Asparagus officinalis]	NA	890.535	359.966	244.492	162.549	163.147	139.632	2.73721	1.45271	0.0193893	0.804329	up	yes
MSTRG.1734	HHC002266	rna-HHC002266.1;MSTRG.1734.1	GO:0016020(membrane);GO:0016709(oxidoreductase activity, acting on paired donors, with incorporation or reduction of molecular oxygen, NAD(P)H as one donor, and incorporation of one atom of oxygen);GO:0044550(secondary metabolite biosynthetic process)	NA	NA	NA	Cytochrome P450 71B36 [Ananas comosus]	NA	33.169	9.48758	6.0429	5.49556	1.97064	4.0492	4.50137	2.17036	0.0194137	0.804329	up	yes
MSTRG.20833	HHC023951	rna-HHC023951.1	GO:0005618(cell wall);GO:0005773(vacuole);GO:0008150(biological_process)	NA	NA	NA	PREDICTED: uncharacterized protein LOC105037261 [Elaeis guineensis]	NA	75.2237	120.197	13.9939	17.6393	16.8345	16.8951	3.36579	1.75094	0.0194384	0.804329	up	yes
MSTRG.17246	HHC018688	MSTRG.17246.1;rna-HHC018688.1	GO:0003677(DNA binding);GO:0003700(DNA binding transcription factor activity);GO:0005634(nucleus);GO:0006351(transcription, DNA-templated);GO:0006355(regulation of transcription, DNA-templated)	04933(AGE-RAGE signaling pathway in diabetic complications)	K06236	NA	protein PHOSPHATE STARVATION RESPONSE 1-like isoform X1 [Asparagus officinalis]	NA	24.5985	26.7186	2.29661	3.49885	2.7794	4.25991	4.05669	2.0203	0.0194541	0.804329	up	yes
MSTRG.28221	HHC035531	MSTRG.28221.1;rna-HHC035531.1	NA	NA	NA	NA	uncharacterized protein LOC109850432 [Asparagus officinalis]	NA	30.1161	19.0318	28.3174	14.111	9.28156	10.6619	2.29589	1.19906	0.0195803	0.807455	up	yes
MSTRG.2260	HHC003012	rna-HHC003012.1	GO:0004164(diphthine synthase activity);GO:0017183(peptidyl-diphthamide biosynthetic process from peptidyl-histidine)	NA	NA	NA	probable diphthine methyl ester synthase [Asparagus officinalis]	NA	12.4745	9.1734	4.67381	2.8128	2.35291	2.19433	3.20354	1.67967	0.0195805	0.807455	up	yes
MSTRG.26426	HHC032689	rna-HHC032689.1	GO:0005515(protein binding)	00195(Photosynthesis)	K02692	NA	PREDICTED: photosystem I reaction center subunit II, chloroplastic-like isoform X2 [Lupinus angustifolius]	NA	1662.45	2044.25	1852.84	642.278	665.323	655.161	2.34831	1.23162	0.0196127	0.807732	up	yes
MSTRG.31118	HHC039728	rna-HHC039728.1	GO:0003735(structural constituent of ribosome);GO:0006412(translation)	NA	NA	NA	probable mitochondrial adenine nucleotide transporter BTL3 [Asparagus officinalis]	NA	103.473	80.9631	13.619	14.4107	17.7307	13.4914	3.40248	1.76659	0.0196599	0.808628	up	yes
MSTRG.24172	HHC029152	rna-HHC029152.1	GO:0004372(glycine hydroxymethyltransferase activity);GO:0005634(nucleus);GO:0005737(cytoplasm);GO:0006544(glycine metabolic process);GO:0006563(L-serine metabolic process);GO:0019264(glycine biosynthetic process from serine);GO:0030170(pyridoxal phosphate binding);GO:0035999(tetrahydrofolate interconversion);GO:0044030(regulation of DNA methylation);GO:0046500(S-adenosylmethionine metabolic proc…	00630(Glyoxylate and dicarboxylate metabolism);00260(Glycine, serine and threonine metabolism);00460(Cyanoamino acid metabolism);00670(One carbon pool by folate)	K00600	EC:2.1.2.1	serine hydroxymethyltransferase 7 isoform X1 [Asparagus officinalis]	NA	36.5863	35.8123	59.863	17.2885	16.857	15.6073	2.30331	1.20371	0.0197647	0.809155	up	yes
MSTRG.2939	HHC004120	MSTRG.2939.1	NA	NA	NA	NA		NA	27.1776	5.32742	1.7319	3.61389	0.172701	1.90904	9.09112	3.18446	0.0197758	0.809155	up	yes
MSTRG.23967	HHC028854	rna-HHC028854.1	GO:0003674(molecular_function);GO:0005739(mitochondrion);GO:0008150(biological_process)	NA	NA	NA	pentatricopeptide repeat-containing protein At4g38150 [Asparagus officinalis]	NA	17.9758	7.10178	10.8264	3.8416	3.42806	3.10934	3.03986	1.60401	0.0198342	0.809155	up	yes
MSTRG.27700	HHC034794	MSTRG.27700.1	NA	NA	NA	NA		NA	4.39376	2.20836	2.50395	1.20631	1.00179	0.752709	2.93884	1.55525	0.0198488	0.809155	up	yes
MSTRG.22882	HHC027352	rna-HHC027352.1	GO:0003674(molecular_function);GO:0008150(biological_process)	NA	NA	NA	PREDICTED: uncharacterized protein LOC105034006 [Elaeis guineensis]	NA	0.659838	0.834259	0.864478	0.541184	0.23454	0.22798	3.13474	1.64835	0.0198608	0.809155	up	yes
MSTRG.33664	HHC051661	MSTRG.33664.1;rna-HHC051661.1	GO:0000209(protein polyubiquitination);GO:0005634(nucleus);GO:0005737(cytoplasm);GO:0030071(regulation of mitotic metaphase/anaphase transition);GO:0031145(anaphase-promoting complex-dependent catabolic process);GO:0031625(ubiquitin protein ligase binding);GO:0061630(ubiquitin protein ligase activity)	04120(Ubiquitin mediated proteolysis)	K06688	EC:2.3.2.23	probable ubiquitin-conjugating enzyme E2 C [Asparagus officinalis]	NA	10.5543	9.39164	8.33971	12.1337	5.88713	3.44293	2.16608	1.11509	0.0198749	0.809155	up	yes
MSTRG.23305		MSTRG.23305.1	NA	NA	NA	NA		NA	0.0001	1.61807	0.0001	2.19779	7.64117	7.75652	0.123917	-3.01256	0.0199006	0.809155	down	yes
MSTRG.14211	HHC014680	MSTRG.14211.1;rna-HHC014680.1	GO:0003735(structural constituent of ribosome);GO:0006412(translation)	NA	NA	NA	mitochondrial uncoupling protein 1 [Dendrobium catenatum]	NA	8.87566	20.0905	1.08126	1.54154	1.90902	1.68884	4.38998	2.13421	0.0199008	0.809155	up	yes
MSTRG.14771	HHC015458	MSTRG.14771.1	NA	NA	NA	NA		NA	2.10001	1.14878	1.42472	0.409778	0.299494	0.23428	4.76165	2.25146	0.019902	0.809155	up	yes
MSTRG.27017	HHC033630	MSTRG.27017.1;rna-HHC033630.1;MSTRG.27017.3;MSTRG.27017.4	GO:0003723(RNA binding);GO:0005634(nucleus);GO:0005730(nucleolus);GO:0005829(cytosol);GO:0009535(chloroplast thylakoid membrane)	03008(Ribosome biogenesis in eukaryotes)	K11128	NA	PREDICTED: putative H/ACA ribonucleoprotein complex subunit 1-like protein 1 [Elaeis guineensis]	NA	85.1061	41.8818	24.1879	28.509	13.8152	20.6588	2.60609	1.38189	0.0199285	0.809194	up	yes
MSTRG.35650	HHC048326	MSTRG.35650.1;rna-HHC048326.1	GO:0004004(ATP-dependent RNA helicase activity);GO:0008380(RNA splicing);GO:0010468(regulation of gene expression);GO:0010501(RNA secondary structure unwinding);GO:0071013(catalytic step 2 spliceosome)	03040(Spliceosome);03013(RNA transport);03015(mRNA surveillance pathway)	K13025	EC:3.6.4.13	eukaryotic initiation factor 4A-3 [Asparagus officinalis]	NA	6.40125	2.13919	2.81916	1.02332	0.773758	0.906477	3.68488	1.88162	0.0200013	0.811112	up	yes
gene-HHC033126	HHC033126	rna-HHC033126.1	GO:0005515(protein binding);GO:0005634(nucleus);GO:0005677(chromatin silencing complex);GO:0006260(DNA replication);GO:0006349(regulation of gene expression by genetic imprinting);GO:0006351(transcription, DNA-templated);GO:0006355(regulation of transcription, DNA-templated);GO:0007275(multicellular organism development);GO:0008283(cell proliferation);GO:0009507(chloroplast);GO:0009555(pollen dev…	NA	NA	NA	PREDICTED: histone-binding protein MSI1 isoform X1 [Elaeis guineensis]	NA	1.5988	0.934538	1.29262	0.677562	0.118535	0.399266	4.3487	2.12059	0.0200898	0.812728	up	yes
MSTRG.13597	HHC013843	rna-HHC013843.1;MSTRG.13597.1;rna-HHC013843.2;rna-HHC013843.3;rna-HHC013843.4	GO:0003674(molecular_function);GO:0005886(plasma membrane);GO:0005886(plasma membrane)	NA	NA	NA	uncharacterized protein LOC109840218 isoform X2 [Asparagus officinalis]	NA	7.40945	3.23054	10.5956	7.67861	19.5973	17.6152	0.388501	-1.36401	0.0201694	0.812728	down	yes
MSTRG.28533	HHC035959	rna-HHC035959.1	GO:0004674(protein serine/threonine kinase activity);GO:0004842(ubiquitin-protein transferase activity);GO:0005524(ATP binding);GO:0005886(plasma membrane);GO:0006468(protein phosphorylation);GO:0016301(kinase activity);GO:0016567(protein ubiquitination);GO:0046777(protein autophosphorylation)	NA	NA	NA	uncharacterized protein A4U43_C07F21060 [Asparagus officinalis]	NA	90.0672	34.4632	14.7563	9.73082	9.7439	12.1279	3.40661	1.76834	0.0201736	0.812728	up	yes
MSTRG.27143	HHC033906	rna-HHC033906.1	GO:0004674(protein serine/threonine kinase activity);GO:0005886(plasma membrane)	NA	NA	NA	probable LRR receptor-like serine/threonine-protein kinase At1g53430 [Phoenix dactylifera]	NA	0.207531	0.510916	0.369328	1.46257	3.1058	2.30444	0.235696	-2.085	0.0202011	0.812728	down	yes
MSTRG.26281	HHC032455	rna-HHC032455.1	NA	NA	NA	NA	PREDICTED: uncharacterized protein LOC105056284 [Elaeis guineensis]	NA	1.35962	2.29489	71.8395	2.78043	2.69007	1.84031	8.63883	3.11084	0.0202233	0.812728	up	yes
gene-HHC005971	HHC005971	rna-HHC005971.2;rna-HHC005971.3;rna-HHC005971.1	GO:0000166(nucleotide binding);GO:0003723(RNA binding);GO:0003729(mRNA binding);GO:0004519(endonuclease activity);GO:0006397(mRNA processing);GO:0009451(RNA modification);GO:0009507(chloroplast);GO:0009570(chloroplast stroma);GO:0009570(chloroplast stroma)	NA	NA	NA	hypothetical protein GW17_00036696 [Ensete ventricosum];PREDICTED: pentatricopeptide repeat-containing protein At3g09650, chloroplastic [Musa acuminata subsp. malaccensis]	NA	1.27832	0.775875	0.991751	0.524173	2.89742	2.33546	0.341123	-1.55164	0.0202269	0.812728	down	yes
MSTRG.34036	HHC052796	rna-HHC052796.1;MSTRG.34036.2	GO:0003713(transcription coactivator activity);GO:0005634(nucleus);GO:0006366(transcription by RNA polymerase II);GO:0045893(positive regulation of transcription, DNA-templated)	NA	NA	NA	uncharacterized protein LOC109837515 [Asparagus officinalis]	NA	17.6733	6.08209	10.6377	6.61308	3.35708	3.92117	2.81703	1.49418	0.0202506	0.812728	up	yes
MSTRG.20409	HHC023282	rna-HHC023282.1	GO:0003674(molecular_function);GO:0005840(ribosome);GO:0008150(biological_process);GO:0009507(chloroplast);GO:0009535(chloroplast thylakoid membrane);GO:0009536(plastid);GO:0009941(chloroplast envelope)	NA	NA	NA	hypothetical protein B296_00058837, partial [Ensete ventricosum]	NA	3.52302	3.06453	6.19417	2.75027	1.8025	1.3123	2.49326	1.31803	0.0202866	0.812728	up	yes
MSTRG.25056	HHC030344	MSTRG.25056.1	NA	NA	NA	NA		NA	40.6558	21.7651	35.5081	10.9056	12.0762	10.7123	2.38793	1.25576	0.0202942	0.812728	up	yes
MSTRG.33392	HHC048172	MSTRG.33392.3;rna-HHC048172.1;MSTRG.33392.2	GO:0005886(plasma membrane);GO:0008158(hedgehog receptor activity);GO:0009506(plasmodesma);GO:0009555(pollen development);GO:0016020(membrane);GO:0090153(regulation of sphingolipid biosynthetic process)	NA	NA	NA	Niemann-Pick C1 protein-like isoform X1 [Asparagus officinalis]	NA	1.99816	2.54771	3.38334	6.09662	8.4502	8.58986	0.411554	-1.28085	0.0202971	0.812728	down	yes
MSTRG.34374	HHC052415	rna-HHC052415.1	GO:0004795(threonine synthase activity);GO:0005737(cytoplasm);GO:0030170(pyridoxal phosphate binding)	00260(Glycine, serine and threonine metabolism);00750(Vitamin B6 metabolism)	K01733	EC:4.2.3.1	LOW QUALITY PROTEIN: threonine synthase, chloroplastic-like [Asparagus officinalis]	NA	8.56875	9.12659	9.23811	4.81495	4.28905	2.42522	2.36425	1.24138	0.0204332	0.816144	up	yes
MSTRG.24337	HHC029357	MSTRG.24337.1;rna-HHC029357.1	GO:0005737(cytoplasm)	NA	NA	NA	uncharacterized protein At1g04910-like [Asparagus officinalis]	NA	5.74559	1.72678	11.8996	11.1555	2.07428	3.2683	2.857	1.5145	0.0204338	0.816144	up	yes
gene-HHC027754	HHC027754	rna-HHC027754.1	NA	NA	NA	NA		NA	8.16319	9.16045	3.97312	2.78049	0.916477	1.66551	4.66254	2.22112	0.0204985	0.817442	up	yes
MSTRG.28517	HHC035942	MSTRG.28517.1	NA	NA	NA	NA		NA	1.55737	3.73895	2.61821	9.04176	15.4849	14.1702	0.285891	-1.80646	0.0205461	0.817442	down	yes
MSTRG.10041	HHC008519	rna-HHC008519.1	GO:0005215(transporter activity);GO:0005345(purine nucleobase transmembrane transporter activity);GO:0006863(purine nucleobase transport);GO:0015853(adenine transport);GO:0015854(guanine transport);GO:0016020(membrane);GO:0016021(integral component of membrane);GO:0022857(transmembrane transporter activity)	NA	NA	NA	PREDICTED: adenine/guanine permease AZG1-like [Elaeis guineensis]	NA	34.4999	12.9528	6.94587	6.8197	5.61344	4.90305	2.91058	1.54131	0.0205571	0.817442	up	yes
gene-HHC027680	HHC027680	rna-HHC027680.1	NA	NA	NA	NA	PREDICTED: protein PHYTOCHROME KINASE SUBSTRATE 2-like [Musa acuminata subsp. malaccensis]	NA	2.67294	2.40156	3.30249	1.01792	0.762437	0.746716	3.11264	1.63814	0.0205872	0.817442	up	yes
MSTRG.1782	HHC002317	rna-HHC002317.1	GO:0009409(response to cold);GO:0009507(chloroplast);GO:0009534(chloroplast thylakoid);GO:0009535(chloroplast thylakoid membrane);GO:0009579(thylakoid);GO:0009735(response to cytokinin);GO:0009772(photosynthetic electron transport in photosystem II);GO:0009773(photosynthetic electron transport in photosystem I);GO:0009941(chloroplast envelope);GO:0010287(plastoglobule);GO:0010319(stromule);GO:001…	00190(Oxidative phosphorylation);00195(Photosynthesis)	K02113	NA	PREDICTED: ATP synthase subunit delta, chloroplastic-like [Musa acuminata subsp. malaccensis]	NA	1414.88	1293.38	1145.74	460.775	467.277	465.335	2.31327	1.20994	0.0206143	0.817442	up	yes
MSTRG.5465	HHC042531	rna-HHC042531.1	GO:0009107(lipoate biosynthetic process);GO:0009249(protein lipoylation);GO:0009507(chloroplast);GO:0016992(lipoate synthase activity)	00785(Lipoic acid metabolism)	K03644	EC:2.8.1.8	ferredoxin-thioredoxin reductase, variable chain-like [Phoenix dactylifera]	NA	42.6493	45.8194	31.323	15.1768	14.9519	14.9812	2.2545	1.17281	0.0206446	0.817442	up	yes
MSTRG.12361	HHC011814	MSTRG.12361.1;rna-HHC011814.1	NA	NA	NA	NA		NA	573.258	598.898	76.5968	94.0965	92.9959	98.6084	3.50423	1.8091	0.0206694	0.817442	up	yes
MSTRG.24044	HHC028962	rna-HHC028962.1	GO:0005737(cytoplasm);GO:0030001(metal ion transport);GO:0046914(transition metal ion binding);GO:0046916(cellular transition metal ion homeostasis)	NA	NA	NA	PREDICTED: copper transport protein ATX1-like isoform X4 [Elaeis guineensis]	NA	53.1391	43.3993	9.74252	9.64562	7.76597	11.4904	3.01008	1.5898	0.0207004	0.817442	up	yes
MSTRG.8358	HHC046857	rna-HHC046857.1	GO:0005634(nucleus);GO:0006355(regulation of transcription, DNA-templated);GO:0009640(photomorphogenesis)	NA	NA	NA	LOW QUALITY PROTEIN: B-box zinc finger protein 24-like [Asparagus officinalis]	NA	657.82	382.503	235.377	135.861	135.798	140.694	2.55262	1.35198	0.0207401	0.817442	up	yes
MSTRG.379	HHC000429	rna-HHC000429.1	GO:0003674(molecular_function);GO:0005783(endoplasmic reticulum);GO:0005789(endoplasmic reticulum membrane);GO:0009507(chloroplast);GO:0016021(integral component of membrane);GO:0016192(vesicle-mediated transport)	NA	NA	NA	hypothetical protein B296_00034752 [Ensete ventricosum]	NA	9.25479	9.49391	3.05422	3.50828	2.58609	2.52736	2.47496	1.30741	0.0207455	0.817442	up	yes
MSTRG.20660	HHC023652	MSTRG.20660.1;MSTRG.20660.3;MSTRG.20660.2	NA	NA	NA	NA		NA	145.649	73.5674	54.0954	41.2464	37.7181	29.4383	2.34199	1.22773	0.0207556	0.817442	up	yes
MSTRG.29259	HHC036915	rna-HHC036915.1	GO:0003674(molecular_function);GO:0008150(biological_process);GO:0009507(chloroplast)	NA	NA	NA	hypothetical protein AXF42_Ash019849 [Apostasia shenzhenica]	NA	2.98918	1.25141	2.77527	0.808601	0.535557	0.684034	3.20783	1.6816	0.0207752	0.817442	up	yes
MSTRG.15951	HHC016925;HHC016926	MSTRG.15951.2;MSTRG.15951.5;rna-HHC016925.1;MSTRG.15951.3;rna-HHC016926.1	GO:0005576(extracellular region);GO:0005886(plasma membrane);GO:0006751(glutathione catabolic process);GO:0016756(glutathione gamma-glutamylcysteinyltransferase activity);GO:0034775(glutathione transmembrane transport);GO:0036374(glutathione hydrolase activity);GO:0048046(apoplast);GO:0102953(hypoglycin A gamma-glutamyl transpeptidase activity);GO:0102953(hypoglycin A gamma-glutamyl transpeptidas…	00590(Arachidonic acid metabolism);00430(Taurine and hypotaurine metabolism);00460(Cyanoamino acid metabolism);00480(Glutathione metabolism);00480(Glutathione metabolism)	K18592	EC:2.3.2.2;EC:3.4.19.13	hypothetical protein GW17_00024033 [Ensete ventricosum]	NA	0.719399	1.02684	0.531168	4.25082	6.36626	5.41374	0.27709	-1.85158	0.0210048	0.825453	down	yes
MSTRG.36278	HHC049924	rna-HHC049924.1	GO:0004364(glutathione transferase activity);GO:0005737(cytoplasm);GO:0006749(glutathione metabolic process)	00480(Glutathione metabolism)	K00799	EC:2.5.1.18	PREDICTED: probable glutathione S-transferase GSTF1 [Musa acuminata subsp. malaccensis]	NA	21.4689	11.8398	11.1667	4.52633	4.7996	5.44493	2.39161	1.25798	0.0211246	0.829135	up	yes
MSTRG.31822	HHC050225	rna-HHC050225.1	GO:0009507(chloroplast);GO:0015391(nucleobase:cation symporter activity)	NA	NA	NA	PREDICTED: pentatricopeptide repeat-containing protein At4g38150-like [Musa acuminata subsp. malaccensis]	NA	5.67493	1.45459	2.15456	1.09865	0.721376	0.652224	3.77938	1.91815	0.0212953	0.831835	up	yes
MSTRG.8136	HHC046508	rna-HHC046508.1;MSTRG.8136.2	GO:0004565(beta-galactosidase activity);GO:0005618(cell wall);GO:0005773(vacuole)	00052(Galactose metabolism);00600(Sphingolipid metabolism);00531(Glycosaminoglycan degradation);00604(Glycosphingolipid biosynthesis - ganglio series);00511(Other glycan degradation)	K12309	EC:3.2.1.23	beta-galactosidase isoform X2 [Asparagus officinalis]	NA	635.079	323.323	31.8215	60.1851	70.0557	50.2006	4.36737	2.12677	0.0213237	0.831835	up	yes
MSTRG.32957	HHC049871	rna-HHC049871.1	GO:0009809(lignin biosynthetic process)	00940(Phenylpropanoid biosynthesis)	K09753	EC:1.2.1.44	cinnamoyl-CoA reductase 1-like isoform X1 [Asparagus officinalis]	NA	51.061	26.5059	31.5321	15.9931	15.7914	12.503	2.21054	1.1444	0.0213691	0.831835	up	yes
MSTRG.34678	HHC050428	rna-HHC050428.1	NA	NA	NA	NA	uncharacterized protein LOC109833499 [Asparagus officinalis]	NA	8.41731	7.12855	3.1261	1.90497	1.89246	1.66491	2.89216	1.53215	0.0213817	0.831835	up	yes
MSTRG.29253	HHC036907	rna-HHC036907.1	GO:0006855(drug transmembrane transport);GO:0017119(Golgi transport complex)	NA	NA	NA	protein DETOXIFICATION 48-like [Phoenix dactylifera]	NA	428.379	277.974	45.7315	54.0581	56.362	58.0092	3.52424	1.81731	0.021383	0.831835	up	yes
MSTRG.25313	HHC030754	MSTRG.25313.2;rna-HHC030754.1	GO:0005737(cytoplasm);GO:0016021(integral component of membrane)	NA	NA	NA	uncharacterized protein LOC110116149 [Dendrobium catenatum]	NA	20.0922	33.3078	50.3558	14.7491	12.7182	13.1833	2.2876	1.19384	0.0214021	0.831835	up	yes
MSTRG.32527	HHC051630	MSTRG.32527.1;rna-HHC051630.1	GO:0003677(DNA binding);GO:0005634(nucleus);GO:0006351(transcription, DNA-templated);GO:0006355(regulation of transcription, DNA-templated);GO:0016569(covalent chromatin modification);GO:0035064(methylated histone binding);GO:0043565(sequence-specific DNA binding);GO:0044212(transcription regulatory region DNA binding);GO:0046872(metal ion binding)	NA	NA	NA	uncharacterized protein A4U43_C02F2570 [Asparagus officinalis]	NA	0.428847	1.91993	0.751301	0.582546	2.58314	3.39277	0.308122	-1.69842	0.0214026	0.831835	down	yes
MSTRG.7894	HHC046010	rna-HHC046010.1	GO:0005737(cytoplasm);GO:0006950(response to stress);GO:0016787(hydrolase activity)	NA	NA	NA	universal stress protein A-like protein isoform X1 [Asparagus officinalis]	NA	6.40849	5.38474	3.49725	1.73917	1.73393	1.72305	2.46308	1.30046	0.021403	0.831835	up	yes
MSTRG.3089	HHC004363;HHC004364	MSTRG.3089.1;rna-HHC004364.1;rna-HHC004363.1	GO:0000502(proteasome complex);GO:0004298(threonine-type endopeptidase activity);GO:0005634(nucleus);GO:0005829(cytosol);GO:0005839(proteasome core complex);GO:0006511(ubiquitin-dependent protein catabolic process);GO:0008233(peptidase activity);GO:0009507(chloroplast);GO:0010043(response to zinc ion);GO:0022626(cytosolic ribosome)	03050(Proteasome)	K02726	EC:3.4.25.1	PREDICTED: proteasome subunit alpha type-2-A [Elaeis guineensis]	NA	19.6832	11.6342	14.7236	4.16031	2.90744	5.84004	2.86947	1.52079	0.0214887	0.834081	up	yes
gene-HHC013891	HHC013891	rna-HHC013891.1;rna-HHC013891.2	NA	NA	NA	NA	PREDICTED: U-box domain-containing protein 33 isoform X2 [Elaeis guineensis];uncharacterized protein A4U43_C05F21960 [Asparagus officinalis]	NA	11.2096	6.96114	1.10543	0.372098	0.902946	0.721583	6.04738	2.59631	0.0215257	0.834081	up	yes
MSTRG.36052	HHC052147	rna-HHC052147.1	GO:0003674(molecular_function);GO:0005575(cellular_component);GO:0008150(biological_process)	04120(Ubiquitin mediated proteolysis)	K03350	NA	PREDICTED: uncharacterized protein LOC105048063 [Elaeis guineensis]	NA	25.241	15.9915	6.67289	6.73868	4.71562	5.61198	2.64553	1.40356	0.0215666	0.834081	up	yes
MSTRG.27548	HHC034543	rna-HHC034543.1	GO:0005634(nucleus);GO:0006511(ubiquitin-dependent protein catabolic process);GO:0031625(ubiquitin protein ligase binding);GO:0043130(ubiquitin binding)	04141(Protein processing in endoplasmic reticulum)	K14015	NA	LOW QUALITY PROTEIN: NPL4-like protein 2 [Asparagus officinalis]	NA	6.73209	4.14609	3.84729	2.69222	1.58741	1.47728	2.84167	1.50674	0.0215924	0.834081	up	yes
MSTRG.33032	HHC052677	rna-HHC052677.1;MSTRG.33032.2	GO:0005345(purine nucleobase transmembrane transporter activity);GO:0006863(purine nucleobase transport);GO:0009507(chloroplast);GO:0016020(membrane);GO:0016021(integral component of membrane)	NA	NA	NA	PREDICTED: probable purine permease 11 [Elaeis guineensis]	NA	18.1483	25.8393	5.95515	7.50442	2.29262	7.72688	2.86677	1.51942	0.0216271	0.834081	up	yes
MSTRG.18955		MSTRG.18955.1	NA	NA	NA	NA		NA	17.6198	12.8607	3.87727	3.08049	3.22055	2.35038	3.36014	1.74852	0.0216346	0.834081	up	yes
MSTRG.13446	HHC013626	rna-HHC013626.1;MSTRG.13446.3;MSTRG.13446.2	GO:0003674(molecular_function);GO:0005739(mitochondrion);GO:0005747(mitochondrial respiratory chain complex I);GO:0005774(vacuolar membrane);GO:0008150(biological_process);GO:0009507(chloroplast)	NA	NA	NA	uncharacterized protein LOC109849092 [Asparagus officinalis]	NA	58.9529	61.9686	56.376	19.4928	22.4392	21.399	2.24451	1.1664	0.0216447	0.834081	up	yes
MSTRG.3489		MSTRG.3489.1	NA	NA	NA	NA		NA	1.59502	1.37134	1.48954	1.66454	3.72051	4.7112	0.362942	-1.46219	0.0217217	0.83519	down	yes
gene-HHC009329	HHC009329	rna-HHC009329.1	GO:0005576(extracellular region);GO:0005773(vacuole);GO:0016042(lipid catabolic process);GO:0016298(lipase activity);GO:0016788(hydrolase activity, acting on ester bonds);GO:0052689(carboxylic ester hydrolase activity)	00901(Indole alkaloid biosynthesis)	K21026	EC:3.1.1.80	GDSL esterase/lipase At1g28570-like [Phoenix dactylifera]	NA	0.660262	1.11312	0.790698	0.171181	0.0711432	0.199876	5.04625	2.33521	0.0217416	0.83519	up	yes
MSTRG.8236	HHC046672	rna-HHC046672.1	GO:0004842(ubiquitin-protein transferase activity);GO:0005515(protein binding);GO:0005634(nucleus);GO:0006511(ubiquitin-dependent protein catabolic process);GO:0009723(response to ethylene);GO:0009873(ethylene-activated signaling pathway);GO:0010105(negative regulation of ethylene-activated signaling pathway);GO:0016567(protein ubiquitination)	04016(MAPK signaling pathway - plant);04075(Plant hormone signal transduction)	K14515	NA	hypothetical protein BHE74_00046053, partial [Ensete ventricosum]	NA	1.2004	0.110458	2.77289	0.199321	0.212606	0.0752685	7.43912	2.89513	0.0217523	0.83519	up	yes
MSTRG.13001	HHC012943	rna-HHC012943.4;rna-HHC012943.3;rna-HHC012943.1;rna-HHC012943.2;rna-HHC012943.5	GO:0004356(glutamate-ammonia ligase activity);GO:0004356(glutamate-ammonia ligase activity)	00630(Glyoxylate and dicarboxylate metabolism);00910(Nitrogen metabolism);00250(Alanine, aspartate and glutamate metabolism);00220(Arginine biosynthesis);00220(Arginine biosynthesis)	K01915	EC:6.3.1.2	glutamine synthetase cytosolic isozyme 1 [Asparagus officinalis];PREDICTED: glutamine synthetase nodule isozyme [Fragaria vesca subsp. vesca]	NA	554.684	539.795	351.762	478.585	236.671	236.545	2.03377	1.02416	0.0218332	0.835786	up	yes
MSTRG.13232	HHC013345	rna-HHC013345.1	GO:0004176(ATP-dependent peptidase activity);GO:0006508(proteolysis);GO:0008233(peptidase activity);GO:0009507(chloroplast)	NA	NA	NA	hypothetical protein GW17_00059220, partial [Ensete ventricosum]	NA	26.7844	20.1921	13.1819	12.6218	8.70544	8.81587	2.0769	1.05443	0.0218337	0.835786	up	yes
MSTRG.34711	HHC052012	MSTRG.34711.1	NA	NA	NA	NA		NA	12.413	95.7268	5.56315	3.04093	5.77535	3.76516	6.11832	2.61314	0.0218468	0.835786	up	yes
gene-HHC002640	HHC002640	rna-HHC002640.3;rna-HHC002640.1;rna-HHC002640.2	GO:0005829(cytosol);GO:0005884(actin filament);GO:0009846(pollen germination);GO:0009860(pollen tube growth);GO:0030036(actin cytoskeleton organization);GO:0032432(actin filament bundle);GO:0051015(actin filament binding);GO:0051017(actin filament bundle assembly);GO:0051639(actin filament network formation);GO:0051764(actin crosslink formation);GO:0051764(actin crosslink formation)	NA	NA	NA	fimbrin-5-like [Asparagus officinalis]	NA	0.0001	0.0001	0.12314	0.106942	0.599945	0.344461	0.121919	-3.036	0.0218759	0.835891	down	yes
MSTRG.3920	HHC005807	rna-HHC005807.1	GO:0006952(defense response)	NA	NA	NA	protein LURP-one-related 8-like [Asparagus officinalis]	NA	127.205	70.8951	122.823	53.742	43.642	44.6446	2.12187	1.08534	0.0219244	0.836379	up	yes
MSTRG.333	HHC000377	rna-HHC000377.1	GO:0003700(DNA binding transcription factor activity);GO:0005634(nucleus);GO:0006351(transcription, DNA-templated);GO:0006355(regulation of transcription, DNA-templated);GO:0006952(defense response);GO:0043565(sequence-specific DNA binding)	04016(MAPK signaling pathway - plant);04626(Plant-pathogen interaction)	K13424	NA	probable WRKY transcription factor 72 isoform X1 [Phoenix dactylifera]	NA	8.62914	2.6092	0.639535	0.977402	0.846301	0.669915	4.23926	2.08381	0.0219512	0.836379	up	yes
gene-HHC038630	HHC038630	rna-HHC038630.1	GO:0003674(molecular_function);GO:0003723(RNA binding);GO:0005739(mitochondrion);GO:0008150(biological_process)	03018(RNA degradation)	K14442	EC:3.6.4.13	PREDICTED: pentatricopeptide repeat-containing protein At3g61520, mitochondrial-like [Musa acuminata subsp. malaccensis]	NA	10.7566	3.52358	1.47682	0.464809	0.61849	0.584727	6.74102	2.75297	0.0219677	0.836379	up	yes
MSTRG.2417	HHC003260	rna-HHC003260.1	GO:0005737(cytoplasm);GO:0016740(transferase activity);GO:0016747(transferase activity, transferring acyl groups other than amino-acyl groups);GO:0080167(response to karrikin)	NA	NA	NA	uncharacterized acetyltransferase At3g50280 [Phoenix dactylifera]	NA	356.138	92.1156	174.934	64.2416	61.7768	66.3438	2.68275	1.42371	0.0220008	0.836524	up	yes
MSTRG.2160	HHC002861	rna-HHC002861.1	GO:0000448(cleavage in ITS2 between 5.8S rRNA and LSU-rRNA of tricistronic rRNA transcript (SSU-rRNA, 5.8S rRNA, LSU-rRNA));GO:0005634(nucleus);GO:0051731(polynucleotide 5'-hydroxyl-kinase activity)	NA	NA	NA	PREDICTED: polynucleotide 5'-hydroxyl-kinase NOL9 [Elaeis guineensis]	NA	0.196377	0.103074	0.172534	0.951474	1.84531	1.71327	0.200004	-2.3219	0.0220242	0.836524	down	yes
MSTRG.28902	HHC036470	rna-HHC036470.1	GO:0003674(molecular_function);GO:0009507(chloroplast);GO:0009523(photosystem II);GO:0009535(chloroplast thylakoid membrane);GO:0015979(photosynthesis);GO:0016021(integral component of membrane);GO:0042549(photosystem II stabilization)	00195(Photosynthesis)	K02721	NA	PREDICTED: photosystem II reaction center W protein, chloroplastic-like [Elaeis guineensis]	NA	1965.81	1635.59	2137.38	798.53	727.308	741.076	2.22602	1.15447	0.0220864	0.837884	up	yes
MSTRG.28672	HHC036136	MSTRG.28672.1;rna-HHC036136.1	NA	NA	NA	NA		NA	25.7802	13.7029	7.38277	5.78294	4.15315	5.3114	2.78137	1.47579	0.0222094	0.841102	up	yes
MSTRG.11826		MSTRG.11826.5;MSTRG.11826.1;MSTRG.11826.4;MSTRG.11826.3;MSTRG.11826.2	NA	NA	NA	NA		NA	14.0243	62.2462	15.0529	9.47583	8.64363	8.50239	2.93943	1.55554	0.0222242	0.841102	up	yes
MSTRG.6357	HHC043736	rna-HHC043736.1	NA	NA	NA	NA		NA	9.03516	5.01757	1.06534	1.72889	0.763058	0.517001	6.58054	2.71821	0.0223909	0.843253	up	yes
MSTRG.9739	HHC007885	rna-HHC007885.1;MSTRG.9739.2	GO:0004129(cytochrome-c oxidase activity);GO:0005739(mitochondrion);GO:0005746(mitochondrial respiratory chain);GO:0016021(integral component of membrane)	NA	NA	NA	uncharacterized protein A4U43_C05F1930 [Asparagus officinalis]	NA	0.906538	1.26073	55.4089	2.20283	1.86899	1.33241	9.33637	3.22286	0.0223932	0.843253	up	yes
MSTRG.24083	HHC029022	rna-HHC029022.1	GO:0003674(molecular_function);GO:0008150(biological_process);GO:0009507(chloroplast);GO:0009535(chloroplast thylakoid membrane)	NA	NA	NA	uncharacterized protein LOC109823770 [Asparagus officinalis]	NA	125.17	82.604	88.8697	47.1133	39.8817	40.4004	2.14093	1.09824	0.0224	0.843253	up	yes
MSTRG.21070		MSTRG.21070.1	NA	NA	NA	NA		NA	5.39839	3.75084	3.64336	15.1964	18.2614	19.622	0.369409	-1.43671	0.0224053	0.843253	down	yes
MSTRG.16571	HHC017765	rna-HHC017765.3;rna-HHC017765.2;rna-HHC017765.1	GO:0008270(zinc ion binding);GO:0009737(response to abscisic acid);GO:0016021(integral component of membrane);GO:0016021(integral component of membrane)	NA	NA	NA	zinc finger protein-like 1 homolog [Asparagus officinalis]	NA	20.0306	8.37935	7.49446	25.7457	5.8413	6.72928	2.45216	1.29405	0.0224138	0.843253	up	yes
MSTRG.29585	HHC037453	rna-HHC037453.1;MSTRG.29585.1;MSTRG.29585.2	GO:0005887(integral component of plasma membrane);GO:0015116(sulfate transmembrane transporter activity)	NA	NA	NA	low affinity sulfate transporter 3 [Asparagus officinalis]	NA	11.6617	63.8028	16.6595	9.4242	8.09247	9.01905	2.96725	1.56912	0.022599	0.848075	up	yes
MSTRG.3871	HHC005746	rna-HHC005746.1	GO:0005887(integral component of plasma membrane);GO:0008509(anion transmembrane transporter activity);GO:0051453(regulation of intracellular pH);GO:0098656(anion transmembrane transport)	NA	NA	NA	boron transporter 1-like [Asparagus officinalis]	NA	0.488554	0.667427	1.05305	2.58587	3.81566	3.19105	0.342165	-1.54724	0.0226024	0.848075	down	yes
MSTRG.15512	HHC016356	rna-HHC016356.1	GO:0003674(molecular_function);GO:0005739(mitochondrion);GO:0006979(response to oxidative stress);GO:0016021(integral component of membrane)	NA	NA	NA	uncharacterized protein LOC103703873 [Phoenix dactylifera]	NA	10.7384	2.22891	0.715439	0.663854	0.79703	0.493439	5.55866	2.47474	0.0226221	0.848075	up	yes
MSTRG.23464	HHC028235	rna-HHC028235.1;MSTRG.23464.2	GO:0005737(cytoplasm);GO:0009807(lignan biosynthetic process);GO:0032442(phenylcoumaran benzylic ether reductase activity);GO:0046686(response to cadmium ion);GO:0050664(oxidoreductase activity, acting on NAD(P)H, oxygen as acceptor);GO:0055114(oxidation-reduction process)	NA	NA	NA	PREDICTED: isoflavone reductase-like protein [Elaeis guineensis]	NA	575.944	2007.75	3196.93	526.911	505.435	550.298	2.98728	1.57883	0.0227242	0.849409	up	yes
MSTRG.10742	HHC009612	rna-HHC009612.1	GO:0005509(calcium ion binding)	04016(MAPK signaling pathway - plant);04070(Phosphatidylinositol signaling system);04626(Plant-pathogen interaction)	K02183	NA	probable calcium-binding protein CML29 [Phoenix dactylifera]	NA	986.082	726.029	120.407	152.896	150.619	150.64	3.29519	1.72036	0.0227313	0.849409	up	yes
MSTRG.27346	HHC034238;HHC034239	MSTRG.27346.2;rna-HHC034238.1;MSTRG.27346.1;MSTRG.27346.5;MSTRG.27346.4	GO:0004497(monooxygenase activity)	NA	NA	NA	cytochrome P450 709B2-like [Asparagus officinalis]	NA	57.0348	19.1229	15.1897	12.546	10.2587	9.72598	2.59933	1.37814	0.0227636	0.849409	up	yes
MSTRG.26797		MSTRG.26797.3;MSTRG.26797.2;MSTRG.26797.1	NA	NA	NA	NA		NA	1.34959	6.50902	6.35653	5.99979	14.0725	14.6576	0.351807	-1.50714	0.0227697	0.849409	down	yes
MSTRG.7588	HHC045392	rna-HHC045392.2;rna-HHC045392.1	GO:0004300(enoyl-CoA hydratase activity);GO:0005739(mitochondrion);GO:0005777(peroxisome);GO:0006635(fatty acid beta-oxidation);GO:0009062(fatty acid catabolic process);GO:0051750(delta3,5-delta2,4-dienoyl-CoA isomerase activity);GO:0051750(delta3,5-delta2,4-dienoyl-CoA isomerase activity)	04146(Peroxisome);04146(Peroxisome)	K12663	EC:5.3.3.21	PREDICTED: LOW QUALITY PROTEIN: delta(3,5)-Delta(2,4)-dienoyl-CoA isomerase, peroxisomal [Elaeis guineensis]	NA	118.12	83.5949	62.5779	53.6508	8.15365	50.7025	2.70103	1.43351	0.0227914	0.849409	up	yes
MSTRG.34756	HHC048505;HHC048506	MSTRG.34756.7;MSTRG.34756.9;MSTRG.34756.6;MSTRG.34756.1;rna-HHC048506.1;MSTRG.34756.3;rna-HHC048505.1;MSTRG.34756.2;MSTRG.34756.5	GO:0005737(cytoplasm);GO:0005829(cytosol);GO:0005886(plasma membrane);GO:0008270(zinc ion binding);GO:0009506(plasmodesma);GO:0031966(mitochondrial membrane);GO:0055114(oxidation-reduction process);GO:0055114(oxidation-reduction process)	00040(Pentose and glucuronate interconversions);00051(Fructose and mannose metabolism);00051(Fructose and mannose metabolism)	K00008	EC:1.1.1.14	sorbitol dehydrogenase [Asparagus officinalis]	NA	35.5841	27.8592	12.8445	15.2947	11.695	8.79363	2.23496	1.16025	0.0228279	0.84977	up	yes
MSTRG.32733	HHC048473	MSTRG.32733.1;rna-HHC048473.1	GO:0022625(cytosolic large ribosomal subunit)	03010(Ribosome)	K02912	NA	60S ribosomal protein L32-1, partial [Ananas comosus]	NA	0.937414	0.652818	2.89518	0.146701	0.0001	0.259098	8.93545	3.15954	0.0229186	0.851675	up	yes
MSTRG.7109	HHC044703;HHC044702	MSTRG.7109.1;rna-HHC044703.1;rna-HHC044702.1	GO:0006813(potassium ion transport);GO:0015079(potassium ion transmembrane transporter activity);GO:0015299(solute:proton antiporter activity);GO:0015386(potassium:proton antiporter activity);GO:0016020(membrane);GO:0016021(integral component of membrane);GO:0022890(inorganic cation transmembrane transporter activity);GO:0071805(potassium ion transmembrane transport);GO:1902600(proton transmembra…	NA	NA	NA	uncharacterized protein A4U43_C04F25280 [Asparagus officinalis];PREDICTED: K(+) efflux antiporter 4-like isoform X1 [Nelumbo nucifera]	NA	1.4428	1.51338	2.87794	7.88333	12.5433	10.7588	0.294339	-1.76445	0.0229327	0.851675	down	yes
MSTRG.9977	HHC008406	rna-HHC008406.1;rna-HHC008406.2	GO:0003700(DNA binding transcription factor activity);GO:0005515(protein binding);GO:0005634(nucleus);GO:0006351(transcription, DNA-templated);GO:0006355(regulation of transcription, DNA-templated);GO:0006970(response to osmotic stress);GO:0009408(response to heat);GO:0009409(response to cold);GO:0009414(response to water deprivation);GO:0009651(response to salt stress);GO:0010120(camalexin biosy…	04016(MAPK signaling pathway - plant);04626(Plant-pathogen interaction);04626(Plant-pathogen interaction)	K13424	NA	WRKY transcription factor WRKY24-like [Phoenix dactylifera]	NA	142.67	49.0503	55.4499	30.1993	26.7182	29.7004	2.45814	1.29757	0.0230169	0.852297	up	yes
MSTRG.23382	HHC028082	rna-HHC028082.1	GO:0004674(protein serine/threonine kinase activity);GO:0004713(protein tyrosine kinase activity);GO:0004714(transmembrane receptor protein tyrosine kinase activity);GO:0005515(protein binding);GO:0005524(ATP binding);GO:0005886(plasma membrane);GO:0006468(protein phosphorylation);GO:0006952(defense response);GO:0007169(transmembrane receptor protein tyrosine kinase signaling pathway);GO:0010942(…	NA	NA	NA	leucine-rich repeat receptor-like serine/threonine/tyrosine-protein kinase SOBIR1 [Asparagus officinalis]	NA	6.47911	0.328647	1.03703	0.62214	0.497001	0.175144	6.29844	2.655	0.0230452	0.852297	up	yes
MSTRG.18308	HHC020467;HHC020471;HHC020469	rna-HHC020467.1;rna-HHC020471.1;MSTRG.18308.1	GO:0005768(endosome);GO:0005794(Golgi apparatus);GO:0005802(trans-Golgi network);GO:0008150(biological_process);GO:0009507(chloroplast);GO:0016021(integral component of membrane);GO:0016021(integral component of membrane)	04120(Ubiquitin mediated proteolysis);04120(Ubiquitin mediated proteolysis)	K10581	EC:2.3.2.24	uncharacterized protein LOC109845325 [Asparagus officinalis]	NA	187.087	63.2791	30.2294	34.5658	28.3429	26.9262	2.85116	1.51155	0.023069	0.852297	up	yes
MSTRG.21093		MSTRG.21093.1	NA	NA	NA	NA		NA	8.70373	3.02599	3.00439	1.72001	0.696535	1.40564	3.91358	1.96849	0.0231001	0.852297	up	yes
MSTRG.13705	HHC013983	MSTRG.13705.2;rna-HHC013983.1	NA	NA	NA	NA		NA	1.27632	1.131	2.39758	1.04414	2.87763	5.8647	0.334524	-1.57982	0.0231438	0.852297	down	yes
MSTRG.33449	HHC048205	rna-HHC048205.1	GO:0005543(phospholipid binding);GO:0005548(phospholipid transporter activity);GO:0005886(plasma membrane);GO:0009706(chloroplast inner membrane);GO:0009707(chloroplast outer membrane);GO:0015914(phospholipid transport)	NA	NA	NA	PREDICTED: protein TRIGALACTOSYLDIACYLGLYCEROL 1, chloroplastic [Elaeis guineensis]	NA	10.77	3.42215	9.49812	5.40675	2.67427	2.68569	2.71429	1.44058	0.023166	0.852297	up	yes
MSTRG.7167		MSTRG.7167.1	NA	NA	NA	NA		NA	62.8285	133.035	47.4773	27.0628	28.7347	27.0871	2.42202	1.27621	0.0231687	0.852297	up	yes
MSTRG.26525	HHC032847	rna-HHC032847.1	GO:0003700(DNA binding transcription factor activity)	NA	NA	NA	ethylene-responsive transcription factor 4-like [Dendrobium catenatum]	NA	1.82646	0.740475	18.2471	1.29318	1.1381	0.825646	5.62884	2.49284	0.0231778	0.852297	up	yes
MSTRG.29586	HHC037456	rna-HHC037456.1;MSTRG.29586.2	GO:0005887(integral component of plasma membrane);GO:0015116(sulfate transmembrane transporter activity)	NA	NA	NA	sulfate transporter 1.2-like [Asparagus officinalis]	NA	174.01	246.723	191.954	80.3652	79.8315	76.7156	2.21356	1.14637	0.023191	0.852297	up	yes
MSTRG.13956	HHC014324;HHC014323	MSTRG.13956.3;rna-HHC014323.1;rna-HHC014324.1;rna-HHC014323.2	GO:0005737(cytoplasm);GO:0008171(O-methyltransferase activity);GO:0009718(anthocyanin-containing compound biosynthetic process);GO:0033485(cyanidin 3-O-glucoside biosynthetic process);GO:0033486(delphinidin 3-O-glucoside biosynthetic process);GO:0043473(pigmentation);GO:0046872(metal ion binding);GO:0046872(metal ion binding)	00950(Isoquinoline alkaloid biosynthesis);00950(Isoquinoline alkaloid biosynthesis)	K21311	EC:2.1.1.336	flavonoid 3',5'-methyltransferase-like [Asparagus officinalis];caffeoyl-CoA O-methyltransferase-like isoform X1 [Asparagus officinalis]	NA	7.77406	4.36801	1.20765	0.626458	0.652656	1.07823	4.03729	2.01339	0.0232848	0.854748	up	yes
gene-HHC052321	HHC052321	rna-HHC052321.1	GO:0004672(protein kinase activity);GO:0004674(protein serine/threonine kinase activity);GO:0005524(ATP binding);GO:0005886(plasma membrane);GO:0006468(protein phosphorylation);GO:0009755(hormone-mediated signaling pathway);GO:0016021(integral component of membrane);GO:0016301(kinase activity);GO:0042803(protein homodimerization activity)	NA	NA	NA	serine/threonine-protein kinase-like protein CCR4 [Ananas comosus]	NA	0.358286	0.596824	0.373447	0.416381	1.23182	2.31411	0.246049	-2.02299	0.0233524	0.854748	down	yes
MSTRG.31332	HHC040011	MSTRG.31332.1;rna-HHC040011.1	GO:0005507(copper ion binding);GO:0009809(lignin biosynthetic process);GO:0016722(oxidoreductase activity, oxidizing metal ions)	NA	NA	NA	PREDICTED: putative laccase-9 [Elaeis guineensis]	NA	0.0001	686.6	9.76579	0.954392	2.24029	3.69292	58.7642	5.87686	0.023372	0.854748	up	yes
MSTRG.18024		MSTRG.18024.1	NA	NA	NA	NA		NA	2.01399	0.0001	0.0001	0.0001	8.3719	4.30737	0.0794325	-3.65413	0.0233953	0.854748	down	yes
MSTRG.29464	HHC037260	rna-HHC037260.1	GO:0003735(structural constituent of ribosome);GO:0006412(translation);GO:0022627(cytosolic small ribosomal subunit)	03010(Ribosome)	K02963	NA	ribosomal protein S18 (chloroplast) [Hemiphylacus alatostylus]	NA	8.4677	0.142757	0.12032	1.47467	0.415523	0.147812	9.05808	3.1792	0.023434	0.854748	up	yes
MSTRG.12904	HHC012768	rna-HHC012768.1	GO:0000502(proteasome complex);GO:0004298(threonine-type endopeptidase activity);GO:0005634(nucleus);GO:0005737(cytoplasm);GO:0005839(proteasome core complex);GO:0006511(ubiquitin-dependent protein catabolic process);GO:0008233(peptidase activity);GO:0022626(cytosolic ribosome)	03050(Proteasome)	K02730	EC:3.4.25.1	proteasome subunit alpha type-6 [Asparagus officinalis]	NA	191.324	140.769	110.55	63.9411	62.7736	55.9975	2.13261	1.09262	0.0234894	0.854748	up	yes
MSTRG.19454	HHC021966	rna-HHC021966.1;MSTRG.19454.2	GO:0005351(carbohydrate:proton symporter activity);GO:0005355(glucose transmembrane transporter activity);GO:0005887(integral component of plasma membrane);GO:0046323(glucose import)	NA	NA	NA	monosaccharide-sensing protein 2-like [Asparagus officinalis]	NA	27.1225	13.5775	5.66616	4.78811	4.46185	4.94415	2.71924	1.4432	0.0234915	0.854748	up	yes
MSTRG.20416	HHC023297	MSTRG.20416.1;MSTRG.20416.3;rna-HHC023297.1;MSTRG.20416.2	NA	NA	NA	NA	protein MARD1 [Cinnamomum micranthum f. kanehirae]	NA	70.8443	34.1137	21.8375	16.5574	16.4522	13.2586	2.41247	1.27051	0.0235	0.854748	up	yes
MSTRG.29619		MSTRG.29619.1;MSTRG.29619.3;MSTRG.29619.2	NA	NA	NA	NA		NA	3.01772	6.89553	1.54319	7.01986	11.7753	14.685	0.349132	-1.51816	0.0235317	0.854922	down	yes
MSTRG.1763	HHC002296	rna-HHC002296.1	GO:0004029(aldehyde dehydrogenase (NAD) activity)	00010(Glycolysis / Gluconeogenesis);00053(Ascorbate and aldarate metabolism);00620(Pyruvate metabolism);00071(Fatty acid degradation);00561(Glycerolipid metabolism);00280(Valine, leucine and isoleucine degradation);00310(Lysine degradation);00330(Arginine and proline metabolism);00340(Histidine metabolism);00380(Tryptophan metabolism);00410(beta-Alanine metabolism);00903(Limonene and pinene degra…	K00128	EC:1.2.1.3	LOW QUALITY PROTEIN: aldehyde dehydrogenase family 2 member B7, mitochondrial-like [Asparagus officinalis]	NA	6.2678	3.97913	21.1137	1.83199	2.49058	2.38107	3.40671	1.76838	0.0235925	0.85615	up	yes
MSTRG.19668	HHC022300	rna-HHC022300.1	GO:0003746(translation elongation factor activity);GO:0005739(mitochondrion);GO:0006414(translational elongation)	NA	NA	NA	uncharacterized protein A4U43_C07F29770 [Asparagus officinalis]	NA	48.4687	34.7472	22.6962	14.6497	14.0815	13.3586	2.19682	1.13542	0.02362	0.856169	up	yes
MSTRG.23022	HHC027564	MSTRG.23022.1;rna-HHC027564.1	GO:0003674(molecular_function);GO:0008150(biological_process);GO:0009507(chloroplast);GO:0009941(chloroplast envelope)	NA	NA	NA	uncharacterized protein LOC109849874 [Asparagus officinalis]	NA	13.9025	6.83392	8.2129	1.89391	2.1209	2.89271	3.07596	1.62103	0.0236552	0.856469	up	yes
MSTRG.7292	HHC044926	MSTRG.7292.1;rna-HHC044926.1	GO:0004672(protein kinase activity);GO:0004674(protein serine/threonine kinase activity);GO:0005515(protein binding);GO:0005524(ATP binding);GO:0005886(plasma membrane);GO:0006468(protein phosphorylation);GO:0007169(transmembrane receptor protein tyrosine kinase signaling pathway);GO:0009506(plasmodesma);GO:0010067(procambium histogenesis);GO:0010087(phloem or xylem histogenesis);GO:0010183(polle…	00040(Pentose and glucuronate interconversions)	K01051	EC:3.1.1.11	MDIS1-interacting receptor like kinase 1-like [Phoenix dactylifera]	NA	3.58783	3.9205	0.832511	0.0001	0.234453	0.0001	17.7805	4.15222	0.023697	0.856857	up	yes
MSTRG.10924	HHC009881	rna-HHC009881.2;MSTRG.10924.1;rna-HHC009881.1	GO:0008150(biological_process);GO:0009507(chloroplast);GO:0016021(integral component of membrane);GO:0016021(integral component of membrane)	NA	NA	NA	uncharacterized protein A4U43_C05F15810 [Asparagus officinalis];uncharacterized protein LOC109843742 [Asparagus officinalis]	NA	83.9894	55.3693	38.0595	18.267	21.4176	19.2487	2.40599	1.26663	0.0237352	0.856857	up	yes
MSTRG.6215		MSTRG.6215.1	NA	NA	NA	NA		NA	11.7515	24.6209	13.3329	6.13741	3.57512	5.74464	2.99593	1.58301	0.0237469	0.856857	up	yes
MSTRG.16773	HHC018043	rna-HHC018043.1;MSTRG.16773.1;MSTRG.16773.4;MSTRG.16773.3	NA	NA	NA	NA	PREDICTED: lectin-like [Eucalyptus grandis]	NA	489.588	763.181	63.3609	151	147.824	58.9171	3.54824	1.8271	0.0237854	0.857272	up	yes
MSTRG.27415	HHC034352	MSTRG.27415.2;MSTRG.27415.1;rna-HHC034352.1	GO:0005739(mitochondrion);GO:0005743(mitochondrial inner membrane);GO:0005747(mitochondrial respiratory chain complex I);GO:0009507(chloroplast);GO:0009853(photorespiration);GO:0016020(membrane);GO:0016651(oxidoreductase activity, acting on NAD(P)H);GO:0022904(respiratory electron transport chain);GO:0031966(mitochondrial membrane);GO:0045271(respiratory chain complex I)	00190(Oxidative phosphorylation)	K03949	NA	probable NADH dehydrogenase [ubiquinone] 1 alpha subcomplex subunit 5, mitochondrial [Asparagus officinalis]	NA	104.534	71.8115	62.6131	37.9874	28.2293	37.471	2.10764	1.07563	0.0240833	0.864529	up	yes
MSTRG.31346	HHC040029	rna-HHC040029.1	GO:0005887(integral component of plasma membrane);GO:0015116(sulfate transmembrane transporter activity)	NA	NA	NA	probable sulfate transporter 3.3 isoform X1 [Phoenix dactylifera]	NA	101.605	77.9506	16.3237	26.0426	17.3859	22.7513	2.76454	1.46704	0.0240952	0.864529	up	yes
MSTRG.31601	HHC040400	rna-HHC040400.1	GO:0003723(RNA binding);GO:0003729(mRNA binding);GO:0003743(translation initiation factor activity);GO:0005737(cytoplasm);GO:0005852(eukaryotic translation initiation factor 3 complex);GO:0005886(plasma membrane);GO:0006413(translational initiation)	03013(RNA transport)	K03248	NA	eukaryotic translation initiation factor 3 subunit G-B-like [Asparagus officinalis]	NA	52.5699	34.1214	50.3316	28.6945	20.1074	20.0379	2.06397	1.04542	0.0241099	0.864529	up	yes
MSTRG.25076	HHC030379	rna-HHC030379.1	GO:0009570(chloroplast stroma);GO:0044183(protein binding involved in protein folding);GO:0061077(chaperone-mediated protein folding)	NA	NA	NA	chaperonin-like RbcX protein 2, chloroplastic [Asparagus officinalis]	NA	8.29913	2.29556	1.37673	0.778009	0.861258	0.430234	4.93593	2.30332	0.0241177	0.864529	up	yes
MSTRG.18061	HHC020005	MSTRG.18061.1;rna-HHC020005.1	GO:0003682(chromatin binding);GO:0004521(endoribonuclease activity);GO:0005515(protein binding);GO:0005634(nucleus);GO:0005654(nucleoplasm);GO:0005719(nuclear euchromatin);GO:0005730(nucleolus);GO:0005829(cytosol);GO:0006306(DNA methylation);GO:0006342(chromatin silencing);GO:0006351(transcription, DNA-templated);GO:0006417(regulation of translation);GO:0009816(defense response to bacterium, inco…	NA	NA	NA	PREDICTED: protein argonaute 4B [Elaeis guineensis]	NA	1.02689	1.69	2.53931	1.38089	4.42821	4.08938	0.389611	-1.35989	0.0241229	0.864529	down	yes
MSTRG.2098	HHC002759	rna-HHC002759.1	GO:0003735(structural constituent of ribosome);GO:0005762(mitochondrial large ribosomal subunit)	03010(Ribosome)	K02888	NA	50S ribosomal protein L21, mitochondrial-like [Asparagus officinalis]	NA	7.50989	3.49063	4.27727	1.18582	1.66682	0.82632	3.30178	1.72324	0.0241927	0.866056	up	yes
MSTRG.27964	HHC035192	MSTRG.27964.2;rna-HHC035192.1	GO:0000977(RNA polymerase II regulatory region sequence-specific DNA binding);GO:0003700(DNA binding transcription factor activity);GO:0005515(protein binding);GO:0005634(nucleus);GO:0006351(transcription, DNA-templated);GO:0009908(flower development);GO:0010228(vegetative to reproductive phase transition of meristem);GO:0040008(regulation of growth);GO:0044212(transcription regulatory region DNA…	NA	NA	NA	MADS-box transcription factor 26-like [Asparagus officinalis]	NA	7.07535	3.19968	0.130456	0.0001	0.0001	0.164162	31.6738	4.98522	0.0244591	0.867026	up	yes
MSTRG.27090	HHC033794	MSTRG.27090.2;MSTRG.27090.3;rna-HHC033794.1	GO:0003674(molecular_function);GO:0008150(biological_process);GO:0009507(chloroplast);GO:0016021(integral component of membrane)	NA	NA	NA	PREDICTED: uncharacterized protein LOC105060603 isoform X2 [Elaeis guineensis]	NA	17.1342	11.0005	2.87363	3.86595	1.71403	1.91386	4.80642	2.26496	0.0244862	0.867026	up	yes
MSTRG.21721	HHC025352	rna-HHC025352.1;MSTRG.21721.1	GO:0003674(molecular_function);GO:0005576(extracellular region);GO:0031225(anchored component of membrane);GO:0051707(response to other organism)	03440(Homologous recombination)	K12173	NA	hypothetical protein AQUCO_00600208v1 [Aquilegia coerulea]	NA	10.3177	2.22414	1.39171	19.7416	18.2182	41.2648	0.283066	-1.82079	0.024512	0.867026	down	yes
MSTRG.4303	HHC040611	MSTRG.4303.1;rna-HHC040611.1	GO:0009813(flavonoid biosynthetic process);GO:0043231(intracellular membrane-bounded organelle);GO:0052696(flavonoid glucuronidation);GO:0080043(quercetin 3-O-glucosyltransferase activity);GO:0080044(quercetin 7-O-glucosyltransferase activity)	00942(Anthocyanin biosynthesis)	K12930	EC:2.4.1.115	UDP glucose-flavonoid 3-O-glucosyltransferase 1 [Narcissus tazetta subsp. chinensis]	NA	14.5585	81.3115	9.62037	10.2287	6.91118	8.66138	3.71548	1.89355	0.0245245	0.867026	up	yes
MSTRG.19633		MSTRG.19633.1	NA	NA	NA	NA		NA	5.05678	5.48662	7.36758	1.93685	2.28053	2.19205	2.21884	1.1498	0.0245528	0.867026	up	yes
MSTRG.35528	HHC048297	rna-HHC048297.1	GO:0000463(maturation of LSU-rRNA from tricistronic rRNA transcript (SSU-rRNA, 5.8S rRNA, LSU-rRNA));GO:0002181(cytoplasmic translation);GO:0003735(structural constituent of ribosome);GO:0022625(cytosolic large ribosomal subunit)	03010(Ribosome)	K02937	NA	PREDICTED: 60S ribosomal protein L7-2-like [Musa acuminata subsp. malaccensis]	NA	10.0047	75.4594	48.6415	9.54225	113.005	134.925	0.289694	-1.7874	0.0245597	0.867026	down	yes
MSTRG.34186	HHC049410	rna-HHC049410.1;MSTRG.34186.2	NA	NA	NA	NA	hypothetical protein BHE74_00024434 [Ensete ventricosum]	NA	92.8817	81.0554	49.4951	45.5887	30.6051	34.2115	2.07524	1.05328	0.0246081	0.867026	up	yes
MSTRG.28227	HHC035538	MSTRG.28227.1;rna-HHC035538.1	GO:0000786(nucleosome);GO:0003677(DNA binding);GO:0005634(nucleus);GO:0006334(nucleosome assembly);GO:0009414(response to water deprivation);GO:0031492(nucleosomal DNA binding)	NA	NA	NA	histone H1-like [Phalaenopsis equestris]	NA	734.433	1008.93	587.873	359.565	310.345	307.27	2.17838	1.12326	0.0246129	0.867026	up	yes
MSTRG.2168	HHC002871	MSTRG.2168.4;MSTRG.2168.3;rna-HHC002871.2;MSTRG.2168.1;MSTRG.2168.2;rna-HHC002871.1	GO:0005515(protein binding);GO:0005773(vacuole);GO:0005774(vacuolar membrane);GO:0005794(Golgi apparatus);GO:0005829(cytosol);GO:0005886(plasma membrane);GO:0009506(plasmodesma);GO:0016020(membrane);GO:0043424(protein histidine kinase binding);GO:0043424(protein histidine kinase binding)	NA	NA	NA	hypersensitive-induced response protein 1 [Phoenix dactylifera]	NA	884.571	344.38	107.971	86.3764	101.426	107.252	3.41028	1.76989	0.0246786	0.867026	up	yes
MSTRG.536	HHC000582	rna-HHC000582.1	GO:0005886(plasma membrane);GO:0016021(integral component of membrane);GO:0042626(ATPase activity, coupled to transmembrane movement of substances)	02010(ABC transporters)	K05681	NA	PREDICTED: ABC transporter G family member 42-like [Elaeis guineensis]	NA	2.46681	0.878816	0.0963117	0.358906	0.0679142	0.201459	7.05497	2.81864	0.0247059	0.867026	up	yes
MSTRG.4297	HHC040599	rna-HHC040599.2;rna-HHC040599.1	GO:0000786(nucleosome);GO:0003677(DNA binding);GO:0005634(nucleus);GO:0005794(Golgi apparatus);GO:0005829(cytosol);GO:0006334(nucleosome assembly);GO:0051276(chromosome organization);GO:0051276(chromosome organization)	NA	NA	NA	histone H4 [Zea mays];Histone core [Cynara cardunculus var. scolymus]	NA	35.8309	36.6156	19.1224	16.459	11.8441	14.2678	2.06856	1.04863	0.0247167	0.867026	up	yes
MSTRG.23676		MSTRG.23676.1	NA	NA	NA	NA		NA	11.3327	0.796966	1.21654	0.965455	0.649741	0.770238	5.03941	2.33325	0.0247389	0.867026	up	yes
MSTRG.32902	HHC050942	rna-HHC050942.1	GO:0004601(peroxidase activity);GO:0005739(mitochondrion);GO:0005759(mitochondrial matrix);GO:0006979(response to oxidative stress);GO:0016209(antioxidant activity);GO:0016491(oxidoreductase activity);GO:0045454(cell redox homeostasis);GO:0046686(response to cadmium ion);GO:0051920(peroxiredoxin activity);GO:0055114(oxidation-reduction process)	NA	NA	NA	PREDICTED: peroxiredoxin-2F, mitochondrial [Musa acuminata subsp. malaccensis]	NA	48.7703	45.3382	57.5641	19.8766	15.6025	23.8525	2.17398	1.12034	0.0247636	0.867026	up	yes
MSTRG.33828	HHC052815	rna-HHC052815.1;MSTRG.33828.2	GO:0004067(asparaginase activity);GO:0005737(cytoplasm);GO:0006508(proteolysis);GO:0006516(glycoprotein catabolic process);GO:0008798(beta-aspartyl-peptidase activity)	NA	NA	NA	LOW QUALITY PROTEIN: probable isoaspartyl peptidase/L-asparaginase 2 [Phoenix dactylifera]	NA	23.7798	13.5297	4.29804	22.9331	6.25643	6.67684	2.49514	1.31912	0.0247662	0.867026	up	yes
MSTRG.9828		MSTRG.9828.1	NA	NA	NA	NA		NA	45.9045	79.2285	33.7513	16.3692	19.6013	17.139	2.38503	1.25401	0.0247895	0.867026	up	yes
MSTRG.11886	HHC011225	MSTRG.11886.2;rna-HHC011225.1	GO:0005515(protein binding);GO:0005737(cytoplasm);GO:0016021(integral component of membrane);GO:0030154(cell differentiation);GO:0040008(regulation of growth);GO:2000012(regulation of auxin polar transport)	NA	NA	NA	pollen-specific protein SF21-like [Asparagus officinalis]	NA	6.79158	8.05064	7.01253	13.7453	28.5443	17.013	0.390718	-1.3558	0.0248431	0.867026	down	yes
MSTRG.4857		MSTRG.4857.1	NA	NA	NA	NA		NA	22.7298	42.5196	35.9767	40.953	73.2596	92.1453	0.429791	-1.21829	0.0248791	0.867026	down	yes
MSTRG.2708	HHC003738	rna-HHC003738.1;rna-HHC003738.2	GO:0003700(DNA binding transcription factor activity);GO:0005515(protein binding);GO:0005634(nucleus);GO:0006351(transcription, DNA-templated);GO:0006355(regulation of transcription, DNA-templated);GO:0006970(response to osmotic stress);GO:0009408(response to heat);GO:0009409(response to cold);GO:0009414(response to water deprivation);GO:0009651(response to salt stress);GO:0010120(camalexin biosy…	04016(MAPK signaling pathway - plant);04626(Plant-pathogen interaction);04626(Plant-pathogen interaction)	K13424	NA	WRKY transcription factor WRKY24-like [Phoenix dactylifera];PREDICTED: WRKY transcription factor WRKY24 [Elaeis guineensis]	NA	122.093	49.0945	39.8822	16.9968	21.0984	22.0926	2.64021	1.40065	0.0249192	0.867026	up	yes
MSTRG.12383	HHC011843	rna-HHC011843.1	GO:0003674(molecular_function);GO:0008150(biological_process)	NA	NA	NA	probable F-box protein At2g36090 [Phoenix dactylifera]	NA	1.04549	0.334306	0.518125	0.0430811	0.116846	0.0193238	7.12712	2.83332	0.024923	0.867026	up	yes
MSTRG.2783	HHC003866	rna-HHC003866.2;rna-HHC003866.1	GO:0003677(DNA binding);GO:0003700(DNA binding transcription factor activity);GO:0005634(nucleus);GO:0006355(regulation of transcription, DNA-templated);GO:0046872(metal ion binding);GO:0046872(metal ion binding)	NA	NA	NA	PREDICTED: zinc finger CCCH domain-containing protein 33-like [Musa acuminata subsp. malaccensis]	NA	297.299	149.499	807.286	136.138	133.045	111.163	2.84639	1.50913	0.0249883	0.867026	up	yes
MSTRG.32683	HHC049578	rna-HHC049578.1	GO:0005515(protein binding);GO:0007186(G-protein coupled receptor signaling pathway);GO:0009507(chloroplast);GO:0009527(plastid outer membrane);GO:0009528(plastid inner membrane);GO:0009532(plastid stroma);GO:0009534(chloroplast thylakoid);GO:0009535(chloroplast thylakoid membrane);GO:0009570(chloroplast stroma);GO:0009707(chloroplast outer membrane);GO:0009941(chloroplast envelope);GO:0010027(th…	NA	NA	NA	protein THYLAKOID FORMATION1, chloroplastic [Asparagus officinalis]	NA	82.6536	67.5313	136.273	41.0584	38.5977	36.1286	2.19144	1.13188	0.0249888	0.867026	up	yes
MSTRG.7400	HHC045072	rna-HHC045072.1	GO:0004674(protein serine/threonine kinase activity);GO:0005886(plasma membrane);GO:0007166(cell surface receptor signaling pathway)	NA	NA	NA	PREDICTED: wall-associated receptor kinase-like 14 [Elaeis guineensis]	NA	87.0624	47.6969	21.4379	16.2208	16.2929	16.6525	2.61673	1.38776	0.0250061	0.867026	up	yes
MSTRG.20939	HHC024139	MSTRG.20939.1;rna-HHC024139.1	GO:0003690(double-stranded DNA binding);GO:0003697(single-stranded DNA binding);GO:0003723(RNA binding);GO:0005739(mitochondrion);GO:0006970(response to osmotic stress);GO:0009409(response to cold);GO:0009414(response to water deprivation);GO:0009651(response to salt stress);GO:1900864(mitochondrial RNA modification)	03040(Spliceosome)	K12741	NA	PREDICTED: glycine-rich RNA-binding protein 4, mitochondrial-like [Musa acuminata subsp. malaccensis]	NA	72.5024	40.8521	25.9846	14.3914	15.6308	16.1304	2.4201	1.27507	0.0250095	0.867026	up	yes
MSTRG.30626	HHC039089	rna-HHC039089.1	GO:0003779(actin binding);GO:0005622(intracellular);GO:0005737(cytoplasm);GO:0009870(defense response signaling pathway, resistance gene-dependent);GO:0015629(actin cytoskeleton);GO:0030042(actin filament depolymerization);GO:0042742(defense response to bacterium)	NA	NA	NA	actin-depolymerizing factor 7-like [Ananas comosus]	NA	5.51786	7.86693	5.69937	3.68274	2.64022	2.19424	2.35465	1.23551	0.0250143	0.867026	up	yes
MSTRG.36183	HHC049487	rna-HHC049487.1	GO:0004842(ubiquitin-protein transferase activity);GO:0031463(Cul3-RING ubiquitin ligase complex)	NA	NA	NA	F-box/kelch-repeat protein SKIP20-like [Dendrobium catenatum]	NA	206.551	124.104	311.719	85.1892	86.352	73.0915	2.28157	1.19003	0.0250196	0.867026	up	yes
MSTRG.1457		MSTRG.1457.1	NA	NA	NA	NA		NA	22.4307	7.51509	1.46982	2.56197	2.12218	2.31892	3.82536	1.9356	0.0250309	0.867026	up	yes
MSTRG.36287	HHC052053	MSTRG.36287.1;rna-HHC052053.1	GO:0000154(rRNA modification);GO:0030515(snoRNA binding);GO:0031428(box C/D snoRNP complex);GO:0032040(small-subunit processome)	03008(Ribosome biogenesis in eukaryotes)	K14565	NA	PREDICTED: probable nucleolar protein 5-2 [Elaeis guineensis]	NA	3.04812	2.58126	1.38814	1.25001	1.06588	0.402096	2.81596	1.49363	0.0250354	0.867026	up	yes
MSTRG.11023	HHC010033	MSTRG.11023.1;rna-HHC010033.1	GO:0008429(phosphatidylethanolamine binding);GO:0009909(regulation of flower development);GO:0010229(inflorescence development);GO:0048510(regulation of timing of transition from vegetative to reproductive phase);GO:0048572(short-day photoperiodism);GO:0048575(short-day photoperiodism, flowering)	04712(Circadian rhythm - plant)	K16223	NA	protein FLOWERING LOCUS T-like [Asparagus officinalis]	NA	10.9083	23.1052	0.671078	0.845596	1.30697	1.77636	5.76168	2.52649	0.0250422	0.867026	up	yes
MSTRG.972	HHC001189	rna-HHC001189.1	GO:0009536(plastid)	00190(Oxidative phosphorylation);00195(Photosynthesis)	K02108	NA	ATP synthase subunit a, chloroplastic [Triticum urartu]	NA	59.6918	5.17368	6.82411	4.82922	4.60486	4.58509	4.16318	2.05769	0.025053	0.867026	up	yes
MSTRG.7032	HHC044640	rna-HHC044640.1	GO:0003677(DNA binding);GO:0003700(DNA binding transcription factor activity);GO:0005634(nucleus);GO:0006351(transcription, DNA-templated);GO:0006355(regulation of transcription, DNA-templated);GO:0010200(response to chitin);GO:0044212(transcription regulatory region DNA binding);GO:0046872(metal ion binding)	NA	NA	NA	PREDICTED: dof zinc finger protein DOF3.1 [Vigna angularis]	NA	5.71878	4.46423	4.96296	2.22351	1.95414	1.93796	2.23138	1.15793	0.0250954	0.867026	up	yes
MSTRG.26561	HHC032894	rna-HHC032894.1	GO:0003676(nucleic acid binding);GO:0003677(DNA binding);GO:0003700(DNA binding transcription factor activity);GO:0005634(nucleus);GO:0005737(cytoplasm);GO:0006355(regulation of transcription, DNA-templated);GO:0046872(metal ion binding)	NA	NA	NA	PREDICTED: LOW QUALITY PROTEIN: zinc finger CCCH domain-containing protein 24-like [Elaeis guineensis]	NA	26.5073	16.1752	15.1984	10.2365	6.31113	6.72514	2.61261	1.38549	0.0251066	0.867026	up	yes
MSTRG.1026	HHC001266	rna-HHC001266.1	NA	NA	NA	NA	uncharacterized protein LOC103705856 [Phoenix dactylifera]	NA	4.05557	3.72839	60.6667	2.55248	2.60185	3.92454	5.4397	2.44353	0.0251209	0.867026	up	yes
MSTRG.35194	HHC052905	MSTRG.35194.2;rna-HHC052905.1;MSTRG.35194.1	GO:0005886(plasma membrane);GO:0030001(metal ion transport);GO:0046872(metal ion binding)	NA	NA	NA	uncharacterized protein A4U43_C04F11050 [Asparagus officinalis]	NA	86.8431	171.1	5.97047	13.2736	16.0255	13.4258	4.70587	2.23446	0.0251775	0.867131	up	yes
MSTRG.480	HHC000539	MSTRG.480.1	NA	NA	NA	NA		NA	0.0001	0.0001	0.71953	3.71158	8.82991	9.53921	0.120619	-3.05148	0.0252054	0.867131	down	yes
MSTRG.30437	HHC038809	rna-HHC038809.1	GO:0003674(molecular_function);GO:0005634(nucleus);GO:0008150(biological_process)	04144(Endocytosis)	K19366	NA	senescence/dehydration-associated protein At4g35985, chloroplastic-like isoform X1 [Asparagus officinalis]	NA	28.1119	37.193	7.64082	5.99651	6.86261	7.01009	2.84524	1.50855	0.0252059	0.867131	up	yes
MSTRG.20040	HHC022797;HHC022793;HHC022802	MSTRG.20040.2;rna-HHC022793.1;rna-HHC022802.1;MSTRG.20040.1	GO:0000786(nucleosome);GO:0003677(DNA binding);GO:0005634(nucleus);GO:0046982(protein heterodimerization activity);GO:0000788(nuclear nucleosome);GO:0006334(nucleosome assembly)	NA	NA	NA	histone H2B-like protein [Cinnamomum micranthum f. kanehirae];histone 2B, partial [Asparagus officinalis]	NA	142.745	109.148	93.9253	52.2393	42.1808	51.2275	2.13074	1.09136	0.0253348	0.870606	up	yes
MSTRG.28553	HHC035995	rna-HHC035995.1;MSTRG.28553.2	GO:0016020(membrane);GO:0042625(ATPase coupled ion transmembrane transporter activity)	00190(Oxidative phosphorylation);04145(Phagosome)	K02151	NA	V-type proton ATPase subunit F-like [Prunus avium]	NA	45.2814	31.9232	38.9674	17.6628	13.2556	18.9864	2.07547	1.05344	0.0253617	0.870606	up	yes
MSTRG.11144	HHC010216;HHC010215	rna-HHC010216.1;MSTRG.11144.1;rna-HHC010215.1	NA	NA	NA	NA		NA	3.75666	1.38846	0.501851	0.0209523	0.101383	0.219639	8.82792	3.14207	0.0254993	0.871072	up	yes
MSTRG.2648	HHC003636	rna-HHC003636.2;rna-HHC003636.1;MSTRG.2648.3	GO:0003676(nucleic acid binding);GO:0003677(DNA binding);GO:0005737(cytoplasm);GO:0008150(biological_process);GO:0046872(metal ion binding);GO:0046872(metal ion binding)	NA	NA	NA	zinc finger CCCH domain-containing protein 11-like [Asparagus officinalis]	NA	88.039	40.5958	28.5583	13.1262	15.9793	15.7516	2.68381	1.42428	0.0255301	0.871072	up	yes
gene-HHC003790	HHC003790	rna-HHC003790.1	GO:0004553(hydrolase activity, hydrolyzing O-glycosyl compounds);GO:0030247(polysaccharide binding);GO:0046658(anchored component of plasma membrane)	NA	NA	NA	glucan endo-1,3-beta-glucosidase 9 [Asparagus officinalis]	NA	0.240156	0.943491	0.233732	0.72178	1.87208	2.72043	0.232897	-2.10224	0.0255397	0.871072	down	yes
MSTRG.23905	HHC028768	rna-HHC028768.1	NA	NA	NA	NA		NA	209.892	104.123	86.1633	56.9843	52.2586	48.2609	2.274	1.18523	0.0255511	0.871072	up	yes
MSTRG.24354	HHC029385	rna-HHC029385.1	GO:0005737(cytoplasm);GO:0008150(biological_process);GO:0016757(transferase activity, transferring glycosyl groups)	NA	NA	NA	PREDICTED: uncharacterized protein LOC104807412 [Tarenaya hassleriana]	NA	3.55163	1.68685	2.62228	1.6817	0.720842	0.973516	2.81595	1.49362	0.0255519	0.871072	up	yes
MSTRG.24525	HHC029606	MSTRG.24525.1;rna-HHC029606.1;MSTRG.24525.3;MSTRG.24525.4;MSTRG.24525.2;MSTRG.24525.5	GO:0005515(protein binding);GO:0009507(chloroplast);GO:0009534(chloroplast thylakoid);GO:0009535(chloroplast thylakoid membrane);GO:0009538(photosystem I reaction center);GO:0009579(thylakoid);GO:0009941(chloroplast envelope);GO:0010287(plastoglobule);GO:0015979(photosynthesis);GO:0016020(membrane);GO:0016021(integral component of membrane);GO:0019684(photosynthesis, light reaction);GO:0031969(ch…	00195(Photosynthesis)	K02699	NA	photosystem I reaction center subunit XI, chloroplastic [Citrus clementina]	NA	2417.43	1704.88	3008.11	851.309	869.955	873.55	2.28899	1.19471	0.0255697	0.871072	up	yes
MSTRG.30306	HHC038597	rna-HHC038597.1	GO:0003677(DNA binding);GO:0003700(DNA binding transcription factor activity);GO:0005515(protein binding);GO:0005634(nucleus);GO:0006351(transcription, DNA-templated);GO:0006355(regulation of transcription, DNA-templated);GO:0009793(embryo development ending in seed dormancy);GO:0009965(leaf morphogenesis);GO:0010150(leaf senescence);GO:0030154(cell differentiation);GO:0045962(positive regulation…	NA	NA	NA	transcription factor TCP4-like [Asparagus officinalis]	NA	2.83337	3.451	7.82017	18.3456	23.0405	23.1653	0.351148	-1.50985	0.0256032	0.871072	down	yes
MSTRG.33806	HHC050313	rna-HHC050313.1	GO:0000462(maturation of SSU-rRNA from tricistronic rRNA transcript (SSU-rRNA, 5.8S rRNA, LSU-rRNA));GO:0003735(structural constituent of ribosome);GO:0006412(translation);GO:0022627(cytosolic small ribosomal subunit)	03010(Ribosome)	K02960	NA	PREDICTED: 40S ribosomal protein S16-like [Elaeis guineensis]	NA	174.887	96.2201	183.417	93.8509	72.8683	59.3762	2.07334	1.05196	0.0256405	0.871072	up	yes
MSTRG.7966	HHC046205;HHC046204	MSTRG.7966.2;MSTRG.7966.3;rna-HHC046205.1;rna-HHC046204.1	GO:0009416(response to light stimulus);GO:0009535(chloroplast thylakoid membrane);GO:0009768(photosynthesis, light harvesting in photosystem I);GO:0009941(chloroplast envelope);GO:0010287(plastoglobule);GO:0016168(chlorophyll binding);GO:0031409(pigment binding);GO:0031409(pigment binding)	00196(Photosynthesis - antenna proteins);00196(Photosynthesis - antenna proteins)	K08912	NA	PREDICTED: chlorophyll a-b binding protein 40, chloroplastic-like [Nicotiana attenuata];Chlorophyll A-B binding protein [Macleaya cordata]	NA	15.9454	35.5932	60.5686	16.4616	6.6786	17.7968	2.62649	1.39314	0.0256556	0.871072	up	yes
MSTRG.35499	HHC052653	rna-HHC052653.1	GO:0000462(maturation of SSU-rRNA from tricistronic rRNA transcript (SSU-rRNA, 5.8S rRNA, LSU-rRNA));GO:0003735(structural constituent of ribosome);GO:0006412(translation);GO:0022627(cytosolic small ribosomal subunit)	03010(Ribosome)	K02960	NA	PREDICTED: 40S ribosomal protein S16-like [Elaeis guineensis]	NA	12.0222	6.37637	11.7662	5.34237	4.81286	3.35647	2.1732	1.11982	0.0256732	0.871072	up	yes
MSTRG.30965	HHC039534;HHC039535	MSTRG.30965.1;rna-HHC039534.1;MSTRG.30965.3;rna-HHC039535.1	GO:0005886(plasma membrane);GO:0006810(transport);GO:0022857(transmembrane transporter activity)	NA	NA	NA	WAT1-related protein At4g19185-like, partial [Asparagus officinalis]	NA	3481.23	2730.92	387.988	523.569	534.768	534.574	3.33088	1.7359	0.0256771	0.871072	up	yes
MSTRG.30525	HHC038938;HHC038937;HHC038943;HHC038940;HHC038941	MSTRG.30525.10;MSTRG.30525.12;MSTRG.30525.6;MSTRG.30525.14;MSTRG.30525.3;MSTRG.30525.11;rna-HHC038943.1;rna-HHC038937.1;MSTRG.30525.16;MSTRG.30525.13;rna-HHC038938.1;MSTRG.30525.4;rna-HHC038940.1;MSTRG.30525.7;MSTRG.30525.2;MSTRG.30525.8;MSTRG.30525.5;rna-HHC038941.1	GO:0009611(response to wounding);GO:0009723(response to ethylene);GO:0009751(response to salicylic acid);GO:0042542(response to hydrogen peroxide);GO:0005829(cytosol);GO:0008171(O-methyltransferase activity);GO:0008757(S-adenosylmethionine-dependent methyltransferase activity);GO:0019438(aromatic compound biosynthetic process)	NA	NA	NA	PREDICTED: tricetin 3',4',5'-O-trimethyltransferase-like [Elaeis guineensis];caffeic acid 3-O-methyltransferase-like isoform X1 [Calamus jenkinsianus];LOW QUALITY PROTEIN: tricetin 3',4',5'-O-trimethyltransferase-like [Asparagus officinalis]	NA	117.415	42.5886	50.8462	29.1182	31.7396	19.229	2.35408	1.23516	0.0257557	0.872808	up	yes
MSTRG.16243	HHC017310	rna-HHC017310.1;rna-HHC017310.2	GO:0005351(carbohydrate:proton symporter activity);GO:0005355(glucose transmembrane transporter activity);GO:0005887(integral component of plasma membrane);GO:0046323(glucose import);GO:0046323(glucose import)	NA	NA	NA	sugar carrier protein A isoform X2 [Asparagus officinalis]	NA	12.8299	8.34289	5.65872	4.41732	3.96941	3.40538	2.11863	1.08313	0.0258162	0.873925	up	yes
MSTRG.3434	HHC005051	rna-HHC005051.1	GO:0046577(long-chain-alcohol oxidase activity)	NA	NA	NA	PREDICTED: long-chain-alcohol oxidase FAO2 [Elaeis guineensis]	NA	52.6981	30.8924	12.6986	7.86319	10.9052	6.96421	2.91426	1.54313	0.0258749	0.874311	up	yes
MSTRG.17861	HHC019660	MSTRG.17861.5;MSTRG.17861.7;rna-HHC019660.2;rna-HHC019660.5;rna-HHC019660.1;MSTRG.17861.6;rna-HHC019660.4;rna-HHC019660.3	GO:0003677(DNA binding);GO:0009295(nucleoid);GO:0009507(chloroplast);GO:0009508(plastid chromosome);GO:0009534(chloroplast thylakoid);GO:0009535(chloroplast thylakoid membrane);GO:0009579(thylakoid);GO:0009737(response to abscisic acid);GO:0009773(photosynthetic electron transport in photosystem I);GO:0009941(chloroplast envelope);GO:0016021(integral component of membrane);GO:0030093(chloroplast …	00562(Inositol phosphate metabolism);04070(Phosphatidylinositol signaling system);04070(Phosphatidylinositol signaling system)	K01092	EC:3.1.3.25	protein CURVATURE THYLAKOID 1B, chloroplastic-like [Asparagus officinalis]	NA	1713.93	1330.69	843.491	540.284	499.746	486.815	2.24436	1.1663	0.0259102	0.874311	up	yes
MSTRG.13944	HHC014306	MSTRG.13944.1;rna-HHC014306.1;MSTRG.13944.2	GO:0003674(molecular_function);GO:0008150(biological_process);GO:0009507(chloroplast)	NA	NA	NA	uncharacterized protein LOC109824045 [Asparagus officinalis]	NA	3.99733	5.15543	3.64012	3.07286	1.35323	2.14252	2.26929	1.18224	0.0259758	0.874976	up	yes
MSTRG.9736		MSTRG.9736.1	NA	NA	NA	NA		NA	1.7686	1.91255	2.90071	0.993917	0.258413	0.598554	4.42011	2.14408	0.025985	0.874976	up	yes
MSTRG.16553	HHC017741	MSTRG.16553.1	NA	NA	NA	NA		NA	1.82408	9.37277	13.7577	1.70376	1.73039	1.96607	3.60592	1.85037	0.0260621	0.875714	up	yes
MSTRG.15469	HHC016293	rna-HHC016293.2;rna-HHC016293.1	GO:0005739(mitochondrion);GO:0008150(biological_process);GO:0005634(nucleus);GO:0005634(nucleus)	NA	NA	NA	PREDICTED: uncharacterized protein LOC103984900 [Musa acuminata subsp. malaccensis];uncharacterized protein LOC109837447 [Asparagus officinalis]	NA	120.343	95.296	38.3897	28.8762	30.9858	28.522	2.37704	1.24917	0.0261097	0.876386	up	yes
MSTRG.7056	HHC044659	MSTRG.7056.1;rna-HHC044659.1	GO:0003674(molecular_function);GO:0008150(biological_process);GO:0009507(chloroplast);GO:0009535(chloroplast thylakoid membrane);GO:0016021(integral component of membrane)	NA	NA	NA	uncharacterized protein LOC109840799 [Asparagus officinalis]	NA	8.75427	4.39802	2.17177	1.34058	1.33792	1.20707	3.27401	1.71106	0.0261736	0.877603	up	yes
MSTRG.33002	HHC047391	rna-HHC047391.1;MSTRG.33002.3;MSTRG.33002.2	GO:0004385(guanylate kinase activity);GO:0005524(ATP binding);GO:0005737(cytoplasm);GO:0005829(cytosol);GO:0009117(nucleotide metabolic process);GO:0016310(phosphorylation);GO:0048229(gametophyte development);GO:0048638(regulation of developmental growth)	00230(Purine metabolism)	K00942	EC:2.7.4.8	uncharacterized protein A4U43_C08F9820 [Asparagus officinalis]	NA	121.53	98.0555	5.12205	18.9304	17.6971	12.9465	3.97535	1.99108	0.0262307	0.878589	up	yes
MSTRG.35847	HHC049198	rna-HHC049198.1	GO:0003677(DNA binding);GO:0003700(DNA binding transcription factor activity);GO:0005622(intracellular);GO:0005634(nucleus);GO:0006351(transcription, DNA-templated);GO:0006355(regulation of transcription, DNA-templated);GO:0006952(defense response);GO:0009873(ethylene-activated signaling pathway);GO:0016020(membrane);GO:0019760(glucosinolate metabolic process);GO:0043565(sequence-specific DNA bin…	NA	NA	NA	PREDICTED: ethylene-responsive transcription factor 3-like [Musa acuminata subsp. malaccensis]	NA	0.978313	1.64868	19.4529	2.65578	0.798731	1.44758	5.50585	2.46097	0.0263184	0.879864	up	yes
MSTRG.32171	HHC051636	rna-HHC051636.1	GO:0005737(cytoplasm);GO:0030001(metal ion transport);GO:0046914(transition metal ion binding);GO:0046916(cellular transition metal ion homeostasis)	NA	NA	NA	heavy metal-associated isoprenylated plant protein 21-like [Asparagus officinalis]	NA	40.61	45.621	6.50557	7.55874	8.13712	6.00415	3.54619	1.82627	0.0263356	0.879864	up	yes
gene-HHC022193	HHC022193	rna-HHC022193.1	GO:0004674(protein serine/threonine kinase activity);GO:0005524(ATP binding);GO:0005886(plasma membrane);GO:0006468(protein phosphorylation);GO:0009751(response to salicylic acid);GO:0016021(integral component of membrane);GO:0016301(kinase activity);GO:0030246(carbohydrate binding)	NA	NA	NA	PREDICTED: L-type lectin-domain containing receptor kinase IV.1-like [Elaeis guineensis]	NA	4.01951	2.17493	0.604153	0.668118	0.542978	0.496149	3.59278	1.8451	0.0263564	0.879864	up	yes
MSTRG.20188		MSTRG.20188.1	NA	NA	NA	NA		NA	0.0683345	0.296182	0.187432	1.54649	2.03191	2.32727	0.240691	-2.05474	0.0263796	0.879864	down	yes
MSTRG.24367	HHC029399	rna-HHC029399.1	GO:0005515(protein binding);GO:0005737(cytoplasm);GO:0005773(vacuole);GO:0008270(zinc ion binding);GO:0015031(protein transport);GO:0016236(macroautophagy);GO:0043130(ubiquitin binding);GO:0051258(protein polymerization)	NA	NA	NA	protein NBR1 homolog [Phoenix dactylifera]	NA	274.351	195.196	127.338	105.63	99.7733	67.405	2.10109	1.07114	0.0264701	0.880604	up	yes
MSTRG.10995	HHC009973;HHC009982	rna-HHC009973.3;MSTRG.10995.6;MSTRG.10995.3;rna-HHC009973.1;rna-HHC009982.1;rna-HHC009973.2;MSTRG.10995.5;MSTRG.10995.4	GO:0003677(DNA binding);GO:0004365(glyceraldehyde-3-phosphate dehydrogenase (NAD+) (phosphorylating) activity);GO:0005507(copper ion binding);GO:0005618(cell wall);GO:0005634(nucleus);GO:0005730(nucleolus);GO:0005737(cytoplasm);GO:0005739(mitochondrion);GO:0005777(peroxisome);GO:0005794(Golgi apparatus);GO:0005829(cytosol);GO:0005886(plasma membrane);GO:0006094(gluconeogenesis);GO:0006096(glycoly…	00010(Glycolysis / Gluconeogenesis);00710(Carbon fixation in photosynthetic organisms);00710(Carbon fixation in photosynthetic organisms)	K00134	EC:1.2.1.12	glyceraldehyde-3-phosphate dehydrogenase 3, cytosolic [Asparagus officinalis]	NA	921.762	731.91	510.982	250.496	264.228	264.175	2.28533	1.1924	0.0264945	0.880604	up	yes
MSTRG.34157	HHC049368	rna-HHC049368.1	GO:0003677(DNA binding);GO:0005634(nucleus);GO:0005829(cytosol);GO:0006351(transcription, DNA-templated);GO:0006355(regulation of transcription, DNA-templated)	NA	NA	NA	AT-hook motif nuclear-localized protein 10-like [Asparagus officinalis]	NA	38.9027	9.27803	6.15035	8.97933	5.85392	4.4401	3.07511	1.62064	0.0265809	0.880604	up	yes
gene-HHC025084	HHC025084	rna-HHC025084.1	GO:0004650(polygalacturonase activity);GO:0005576(extracellular region);GO:0005618(cell wall);GO:0008152(metabolic process);GO:0009556(microsporogenesis);GO:0010584(pollen exine formation);GO:0016829(lyase activity);GO:0071555(cell wall organization)	NA	NA	NA	LOW QUALITY PROTEIN: polygalacturonase QRT3-like [Asparagus officinalis]	NA	0.0001	0.0001	0.0001	0.898639	2.15307	1.93884	0.109844	-3.18648	0.0265822	0.880604	down	yes
MSTRG.23857		MSTRG.23857.1	NA	NA	NA	NA		NA	7.08039	44.2095	11.2767	5.53359	4.95764	5.91017	3.13312	1.6476	0.0265915	0.880604	up	yes
MSTRG.6683	HHC044170	MSTRG.6683.1	NA	NA	NA	NA		NA	0.962916	0.239158	0.748916	0.135195	0.139968	0.0366604	5.90557	2.56208	0.0265959	0.880604	up	yes
MSTRG.27942	HHC035158;HHC035159	MSTRG.27942.1;MSTRG.27942.2;MSTRG.27942.3	NA	NA	NA	NA		NA	22.486	14.1822	3.61919	3.22698	1.50239	3.7032	4.17957	2.06336	0.0266753	0.882314	up	yes
MSTRG.2759	HHC003829	rna-HHC003829.1	GO:0000287(magnesium ion binding);GO:0004737(pyruvate decarboxylase activity);GO:0005575(cellular_component);GO:0016831(carboxy-lyase activity);GO:0030976(thiamine pyrophosphate binding)	00010(Glycolysis / Gluconeogenesis)	K01568	EC:4.1.1.1	PREDICTED: pyruvate decarboxylase 1 [Elaeis guineensis]	NA	274.616	179.796	93.7278	86.821	79.6145	64.3112	2.20586	1.14134	0.0267335	0.883317	up	yes
MSTRG.29251	HHC036904	MSTRG.29251.2;rna-HHC036904.1	GO:0003924(GTPase activity);GO:0005622(intracellular);GO:0006412(translation)	03013(RNA transport)	K03243	NA	uncharacterized protein A4U43_C04F15830 [Asparagus officinalis]	NA	74.4437	45.2343	30.5183	22.335	14.9691	21.1619	2.38758	1.25555	0.0267967	0.884487	up	yes
MSTRG.26647	HHC033016	rna-HHC033016.1	GO:0005634(nucleus);GO:0007165(signal transduction);GO:0009640(photomorphogenesis);GO:0016567(protein ubiquitination);GO:0016607(nuclear speck);GO:0031648(protein destabilization);GO:0035091(phosphatidylinositol binding);GO:0046872(metal ion binding);GO:0061630(ubiquitin protein ligase activity)	NA	NA	NA	nitric oxide synthase-interacting protein [Asparagus officinalis]	NA	4.13682	1.96301	3.84734	0.972005	1.04414	0.752063	3.03951	1.60384	0.0268398	0.88499	up	yes
MSTRG.33237	HHC052187	rna-HHC052187.1	GO:0003677(DNA binding);GO:0003700(DNA binding transcription factor activity);GO:0005634(nucleus);GO:0006351(transcription, DNA-templated);GO:0006355(regulation of transcription, DNA-templated);GO:0009873(ethylene-activated signaling pathway)	NA	NA	NA	ethylene-responsive transcription factor RAP2-1 [Phoenix dactylifera]	NA	59.5302	24.9234	45.8909	23.2288	18.7341	17.436	2.12294	1.08606	0.0269155	0.886313	up	yes
MSTRG.22451	HHC026655	rna-HHC026655.1	GO:0004364(glutathione transferase activity);GO:0009507(chloroplast)	NA	NA	NA	PREDICTED: uncharacterized protein LOC105055760 [Elaeis guineensis]	NA	70.6858	4.13645	10.5514	3.70727	4.17669	3.65787	5.68513	2.50719	0.0269912	0.886313	up	yes
MSTRG.15944	HHC016915	rna-HHC016915.1	GO:0000103(sulfate assimilation);GO:0005737(cytoplasm);GO:0006457(protein folding);GO:0015035(protein disulfide oxidoreductase activity);GO:0016671(oxidoreductase activity, acting on a sulfur group of donors, disulfide as acceptor);GO:0034599(cellular response to oxidative stress);GO:0045454(cell redox homeostasis);GO:0055114(oxidation-reduction process)	NA	NA	NA	thioredoxin-like protein CDSP32, chloroplastic [Phoenix dactylifera]	NA	2774.22	1430.12	1640.66	709.13	703.978	728.001	2.28848	1.19439	0.0270022	0.886313	up	yes
MSTRG.23856	HHC028704	MSTRG.23856.1;MSTRG.23856.2;rna-HHC028704.1	GO:0003729(mRNA binding);GO:0016301(kinase activity);GO:0016310(phosphorylation);GO:0046872(metal ion binding)	NA	NA	NA	TATA-binding protein-associated factor 2N-like [Phoenix dactylifera]	NA	127.452	150.844	23.8898	27.8321	26.6727	31.057	2.85831	1.51516	0.0270302	0.886313	up	yes
MSTRG.26309	HHC032502	MSTRG.26309.1;rna-HHC032502.1;MSTRG.26309.2	GO:0005385(zinc ion transmembrane transporter activity);GO:0010043(response to zinc ion);GO:0016020(membrane);GO:0061088(regulation of sequestering of zinc ion)	NA	NA	NA	metal tolerance protein 4-like [Asparagus officinalis]	NA	3.06875	0.935587	0.108435	0.169478	0.21753	0.125076	6.24954	2.64375	0.0270351	0.886313	up	yes
MSTRG.421	HHC000476	rna-HHC000476.1	GO:0005829(cytosol);GO:0006355(regulation of transcription, DNA-templated);GO:0008469(histone-arginine N-methyltransferase activity);GO:0035242(protein-arginine omega-N asymmetric methyltransferase activity)	NA	NA	NA	probable protein arginine N-methyltransferase 1 [Asparagus officinalis]	NA	10.3455	8.66887	5.48864	2.38327	2.99193	1.12405	3.26609	1.70756	0.0270474	0.886313	up	yes
MSTRG.31327	HHC040009;HHC040008;HHC040010	MSTRG.31327.4;MSTRG.31327.2;MSTRG.31327.5;MSTRG.31327.3;MSTRG.31327.1;MSTRG.31327.6	NA	NA	NA	NA		NA	0.692156	35.9825	0.395794	1.42245	0.660323	1.12407	10.786	3.43109	0.0270999	0.886604	up	yes
MSTRG.35547	HHC048325	rna-HHC048325.1	GO:0005730(nucleolus);GO:0005739(mitochondrion);GO:0005747(mitochondrial respiratory chain complex I);GO:0005773(vacuole);GO:0005774(vacuolar membrane);GO:0005794(Golgi apparatus);GO:0005886(plasma membrane);GO:0007005(mitochondrion organization);GO:0009651(response to salt stress);GO:0009723(response to ethylene);GO:0009733(response to auxin);GO:0016020(membrane);GO:0016021(integral component of…	NA	NA	NA	prohibitin-3, mitochondrial-like [Dendrobium catenatum]	NA	1.33301	0.817227	0.647427	0.19175	0.188225	0.235873	3.52444	1.8174	0.0271258	0.886604	up	yes
MSTRG.22662	HHC027055	rna-HHC027055.1	GO:0003674(molecular_function);GO:0005737(cytoplasm);GO:0008150(biological_process);GO:0016021(integral component of membrane)	NA	NA	NA	uncharacterized protein LOC103722200 [Phoenix dactylifera]	NA	28.7459	22.6987	15.3481	12.5037	9.49485	10.2463	2.0084	1.00605	0.0271401	0.886604	up	yes
MSTRG.33672	HHC053119	MSTRG.33672.1;rna-HHC053119.1	GO:0009908(flower development);GO:0048262(determination of dorsal/ventral asymmetry)	NA	NA	NA	transcription factor DIVARICATA [Asparagus officinalis]	NA	96.7899	34.3407	59.085	44.147	21.2464	30.8418	2.24967	1.16971	0.0271891	0.88687	up	yes
MSTRG.20169	HHC022969	rna-HHC022969.1	GO:0004197(cysteine-type endopeptidase activity);GO:0005615(extracellular space);GO:0005764(lysosome);GO:0051603(proteolysis involved in cellular protein catabolic process)	04145(Phagosome)	K01365	EC:3.4.22.15	LOW QUALITY PROTEIN: oryzain alpha chain-like [Asparagus officinalis]	NA	3.62408	4.94888	5.93257	12.8252	18.0085	17.0517	0.389769	-1.35931	0.0272074	0.88687	down	yes
MSTRG.31350	HHC040039	rna-HHC040039.1	GO:0004742(dihydrolipoyllysine-residue acetyltransferase activity);GO:0005739(mitochondrion);GO:0005829(cytosol);GO:0006086(acetyl-CoA biosynthetic process from pyruvate);GO:0006096(glycolytic process);GO:0009507(chloroplast);GO:0009534(chloroplast thylakoid);GO:0009570(chloroplast stroma);GO:0009941(chloroplast envelope);GO:0016020(membrane);GO:0022626(cytosolic ribosome)	00010(Glycolysis / Gluconeogenesis);00020(Citrate cycle (TCA cycle));00620(Pyruvate metabolism)	K00627	EC:2.3.1.12	dihydrolipoyllysine-residue acetyltransferase component 4 of pyruvate dehydrogenase complex, chloroplastic [Sesamum indicum]	NA	9.28997	5.09968	7.16496	2.47162	2.53182	2.52062	2.37769	1.24956	0.0272457	0.88687	up	yes
MSTRG.31982	HHC049039	rna-HHC049039.1	GO:0009507(chloroplast);GO:0009522(photosystem I);GO:0009534(chloroplast thylakoid);GO:0009535(chloroplast thylakoid membrane);GO:0009579(thylakoid);GO:0009773(photosynthetic electron transport in photosystem I);GO:0009780(photosynthetic NADP+ reduction);GO:0009941(chloroplast envelope);GO:0015979(photosynthesis);GO:0016020(membrane);GO:0016021(integral component of membrane);GO:0016168(chlorophy…	00195(Photosynthesis)	K08905	NA	hypothetical protein GW17_00046665 [Ensete ventricosum]	NA	1319.34	1399.06	1941.01	586.306	620.001	565.869	2.21176	1.14519	0.0272686	0.88687	up	yes
MSTRG.4364	HHC040706	rna-HHC040706.1;rna-HHC040706.2	GO:0016021(integral component of membrane);GO:0016021(integral component of membrane)	NA	NA	NA	transmembrane 9 superfamily member 8-like [Asparagus officinalis]	NA	17.3684	2.90518	2.16913	3.05825	21.0849	21.9089	0.296566	-1.75357	0.0272879	0.88687	down	yes
MSTRG.8974	HHC006579	rna-HHC006579.1	GO:0003677(DNA binding);GO:0003700(DNA binding transcription factor activity);GO:0005515(protein binding);GO:0005634(nucleus);GO:0005737(cytoplasm);GO:0006351(transcription, DNA-templated);GO:0006355(regulation of transcription, DNA-templated);GO:0009736(cytokinin-activated signaling pathway);GO:0009873(ethylene-activated signaling pathway);GO:0048366(leaf development);GO:0048825(cotyledon develo…	04626(Plant-pathogen interaction)	K13434	NA	pathogenesis-related genes transcriptional activator PTI6-like [Phoenix dactylifera]	NA	10.6932	3.91007	3.4467	1.11036	1.01547	1.64254	3.60427	1.84971	0.0274624	0.891629	up	yes
MSTRG.25917	HHC031855	rna-HHC031855.1	GO:0000373(Group II intron splicing);GO:0003723(RNA binding);GO:0005515(protein binding);GO:0005576(extracellular region);GO:0009507(chloroplast);GO:0015979(photosynthesis);GO:0016787(hydrolase activity)	NA	NA	NA	protein ROOT PRIMORDIUM DEFECTIVE 1 [Asparagus officinalis]	NA	60.7791	28.7679	37.0287	16.8536	16.8057	15.5365	2.21737	1.14885	0.027593	0.894956	up	yes
MSTRG.153	HHC000172	rna-HHC000172.1	GO:0005634(nucleus);GO:0005783(endoplasmic reticulum);GO:0016036(cellular response to phosphate starvation);GO:0070417(cellular response to cold);GO:0080040(positive regulation of cellular response to phosphate starvation)	NA	NA	NA	SPX domain-containing protein 1-like [Asparagus officinalis]	NA	5.08163	12.06	2.93605	1.17705	1.75837	0.821715	4.11899	2.04229	0.0276956	0.897367	up	yes
MSTRG.8469	HHC047057	rna-HHC047057.2;rna-HHC047057.1	GO:0003674(molecular_function);GO:0008150(biological_process);GO:0009507(chloroplast);GO:0009535(chloroplast thylakoid membrane);GO:0009535(chloroplast thylakoid membrane)	NA	NA	NA	uncharacterized protein LOC109823770 [Asparagus officinalis]	NA	47.4409	56.1278	55.1689	22.5281	22.3703	22.1594	2.03533	1.02527	0.027727	0.897466	up	yes
MSTRG.2936	HHC004114	rna-HHC004114.1	GO:0005575(cellular_component);GO:0009056(catabolic process);GO:0016787(hydrolase activity);GO:0052689(carboxylic ester hydrolase activity)	04075(Plant hormone signal transduction)	K14493	EC:3.-.-.-	PREDICTED: probable carboxylesterase 15 [Elaeis guineensis]	NA	111.189	105.878	53.954	35.6065	37.8329	32.7539	2.17198	1.11901	0.0278019	0.898065	up	yes
MSTRG.32140	HHC048590	MSTRG.32140.1;MSTRG.32140.2	NA	NA	NA	NA		NA	405.742	226.464	54.393	59.1537	63.7331	60.1234	3.01055	1.59003	0.0278115	0.898065	up	yes
MSTRG.14884	HHC015602	rna-HHC015602.1;MSTRG.14884.1	GO:0005351(carbohydrate:proton symporter activity);GO:0005355(glucose transmembrane transporter activity);GO:0005887(integral component of plasma membrane);GO:0046323(glucose import)	NA	NA	NA	sugar transporter [Allium sativum]	NA	230.494	79.095	25.9786	29.6686	28.6389	28.6162	3.18956	1.67336	0.0278767	0.898065	up	yes
MSTRG.6365	HHC043745	rna-HHC043745.1;rna-HHC043745.2	GO:0005739(mitochondrion);GO:0005759(mitochondrial matrix);GO:0005829(cytosol);GO:0006552(leucine catabolic process);GO:0009055(electron transfer activity);GO:0015996(chlorophyll catabolic process);GO:0055114(oxidation-reduction process);GO:0055114(oxidation-reduction process)	NA	NA	NA	PREDICTED: electron transfer flavoprotein subunit beta, mitochondrial isoform X1 [Elaeis guineensis];LOW QUALITY PROTEIN: electron transfer flavoprotein subunit beta, mitochondrial [Asparagus officinalis]	NA	38.4645	33.6836	31.7961	17.3257	14.8317	15.2829	2.01347	1.00969	0.0278839	0.898065	up	yes
MSTRG.1238	HHC001556	MSTRG.1238.1	NA	NA	NA	NA		NA	0.333859	5.02262	0.111194	14.7901	23.2413	27.1545	0.200986	-2.31483	0.0279096	0.898065	down	yes
MSTRG.8566	HHC047143	MSTRG.8566.1	NA	NA	NA	NA		NA	0.110475	0.242925	0.225302	0.237573	0.505924	1.04156	0.263744	-1.92279	0.0279291	0.898065	down	yes
MSTRG.5740	HHC042886	rna-HHC042886.1;rna-HHC042886.2	GO:0005515(protein binding);GO:0005886(plasma membrane);GO:0005886(plasma membrane)	04145(Phagosome);04933(AGE-RAGE signaling pathway in diabetic complications);04933(AGE-RAGE signaling pathway in diabetic complications)	K04392	NA	rac-like GTP-binding protein ARAC5 [Cinnamomum micranthum f. kanehirae]	NA	14.2748	10.0428	16.2997	8.65286	6.6937	4.85884	2.13243	1.0925	0.0279607	0.898065	up	yes
MSTRG.34292	HHC053035	rna-HHC053035.1	GO:0030599(pectinesterase activity);GO:0046910(pectinesterase inhibitor activity);GO:0071944(cell periphery)	00040(Pentose and glucuronate interconversions)	K01051	EC:3.1.1.11	PREDICTED: pectinesterase-like [Elaeis guineensis]	NA	7.81736	3.83239	1.26918	0.804019	1.2744	0.666617	3.53499	1.82171	0.0279717	0.898065	up	yes
gene-HHC043596	HHC043596	rna-HHC043596.1;rna-HHC043596.2	GO:0005634(nucleus);GO:0005737(cytoplasm);GO:0005737(cytoplasm)	NA	NA	NA	U-box domain-containing protein 15, partial [Ananas comosus]	NA	4.261	1.99105	0.199326	2.29093	0.479775	0.0001	9.10895	3.18729	0.0280963	0.898566	up	yes
gene-HHC053482	HHC053482	rna-HHC053482.1	GO:0003700(DNA binding transcription factor activity);GO:0005634(nucleus);GO:0006351(transcription, DNA-templated);GO:0006355(regulation of transcription, DNA-templated);GO:0007275(multicellular organism development);GO:0009753(response to jasmonic acid);GO:0044212(transcription regulatory region DNA binding);GO:0045995(regulation of embryonic development);GO:0048317(seed morphogenesis);GO:008006…	NA	NA	NA	PREDICTED: NAC transcription factor NAM-B2 [Elaeis guineensis]	NA	1.0419	0.628431	0.203281	0.219504	0.114089	0.0935432	5.04045	2.33355	0.0281388	0.898566	up	yes
MSTRG.24680	HHC029804	MSTRG.24680.1;MSTRG.24680.2;MSTRG.24680.3;MSTRG.24680.4;rna-HHC029804.1;MSTRG.24680.5	GO:0005739(mitochondrion);GO:0005768(endosome);GO:0005794(Golgi apparatus);GO:0005802(trans-Golgi network);GO:0009058(biosynthetic process);GO:0009507(chloroplast);GO:0016757(transferase activity, transferring glycosyl groups)	NA	NA	NA	uncharacterized protein A4U43_C05F17380 [Asparagus officinalis]	NA	20.2012	12.9154	110.658	41.2912	153.261	148.718	0.306421	-1.70641	0.0281593	0.898566	down	yes
MSTRG.13872	HHC014200	rna-HHC014200.1;rna-HHC014200.2	GO:0030288(outer membrane-bounded periplasmic space);GO:0030288(outer membrane-bounded periplasmic space)	NA	NA	NA	PREDICTED: carboxyl-terminal-processing peptidase 3, chloroplastic isoform X1 [Nelumbo nucifera];carboxyl-terminal-processing peptidase 3, chloroplastic [Asparagus officinalis]	NA	79.9507	44.1114	13.3605	12.3697	12.1789	14.2416	2.83477	1.50323	0.0281733	0.898566	up	yes
MSTRG.18673	HHC020917;HHC020918;HHC020915;HHC020914	MSTRG.18673.5;MSTRG.18673.8;rna-HHC020915.1;rna-HHC020914.1;MSTRG.18673.4;rna-HHC020918.1;MSTRG.18673.2;rna-HHC020917.1	GO:0005783(endoplasmic reticulum);GO:0016020(membrane);GO:0016788(hydrolase activity, acting on ester bonds);GO:0016788(hydrolase activity, acting on ester bonds)	NA	NA	NA	LOW QUALITY PROTEIN: protein STRICTOSIDINE SYNTHASE-LIKE 6-like [Asparagus officinalis]	NA	52.7275	29.396	8.89141	11.4596	9.45867	9.78467	2.6626	1.41283	0.0281843	0.898566	up	yes
MSTRG.16923	HHC018249	rna-HHC018249.1	NA	NA	NA	NA		NA	253.094	80.5569	52.0441	34.5103	39.359	34.9244	2.82839	1.49998	0.02822	0.898566	up	yes
MSTRG.27138	HHC033898	rna-HHC033898.1	GO:0003674(molecular_function);GO:0005886(plasma membrane);GO:0009585(red, far-red light phototransduction);GO:0009638(phototropism);GO:0010017(red or far-red light signaling pathway)	NA	NA	NA	protein PHYTOCHROME KINASE SUBSTRATE 4-like [Phoenix dactylifera]	NA	79.5352	33.9682	40.9684	16.1904	19.2043	16.2627	2.40593	1.26659	0.0282581	0.898566	up	yes
MSTRG.24895	HHC030115	rna-HHC030115.1	GO:0003700(DNA binding transcription factor activity);GO:0005515(protein binding);GO:0005622(intracellular);GO:0005634(nucleus);GO:0006355(regulation of transcription, DNA-templated);GO:0008270(zinc ion binding);GO:0009409(response to cold);GO:0009555(pollen development)	NA	NA	NA	B-box zinc finger protein 22 [Hevea brasiliensis]	NA	59.7944	19.0524	10.8202	8.80574	9.51182	8.1867	2.78195	1.4761	0.0283676	0.898566	up	yes
MSTRG.21364	HHC024920	rna-HHC024920.1	GO:0004675(transmembrane receptor protein serine/threonine kinase activity);GO:0004713(protein tyrosine kinase activity);GO:0005524(ATP binding);GO:0005737(cytoplasm);GO:0005886(plasma membrane);GO:0006468(protein phosphorylation);GO:0007166(cell surface receptor signaling pathway);GO:0009860(pollen tube growth);GO:0016301(kinase activity);GO:0048768(root hair cell tip growth)	04626(Plant-pathogen interaction)	K13436	EC:2.7.11.1	probable protein kinase At2g41970 [Asparagus officinalis]	NA	1.6367	3.75519	1.77154	4.65465	9.39844	11.3727	0.284483	-1.81359	0.0283903	0.898566	down	yes
MSTRG.33702	HHC052506	rna-HHC052506.1;MSTRG.33702.1	GO:0004842(ubiquitin-protein transferase activity);GO:0005524(ATP binding);GO:0005737(cytoplasm);GO:0005886(plasma membrane);GO:0006511(ubiquitin-dependent protein catabolic process);GO:0016567(protein ubiquitination);GO:0016740(transferase activity)	04141(Protein processing in endoplasmic reticulum);04120(Ubiquitin mediated proteolysis)	K06689	EC:2.3.2.23	ubiquitin-conjugating enzyme E2 28 [Phoenix dactylifera]	NA	29.3896	33.57	15.8096	8.59258	10.4121	9.15933	2.23187	1.15825	0.0283985	0.898566	up	yes
MSTRG.27078		MSTRG.27078.1	NA	NA	NA	NA		NA	3.20069	2.17963	2.7126	2.08853	1.16899	1.10132	2.2423	1.16498	0.0284124	0.898566	up	yes
MSTRG.1824	HHC002375	rna-HHC002375.1;MSTRG.1824.1	GO:0003674(molecular_function);GO:0005634(nucleus);GO:0008150(biological_process)	NA	NA	NA	protein ENHANCED DISEASE RESISTANCE 2-like [Phoenix dactylifera]	NA	24.5069	18.878	19.3173	15.489	8.4873	9.06525	2.22735	1.15533	0.028441	0.898566	up	yes
MSTRG.31481		MSTRG.31481.1	NA	NA	NA	NA		NA	11.1122	9.07391	3.07967	2.66614	2.1363	3.0442	2.50284	1.32357	0.0284986	0.898566	up	yes
MSTRG.27740	HHC034849	MSTRG.27740.1;rna-HHC034849.1	GO:0000166(nucleotide binding);GO:0003824(catalytic activity);GO:0005634(nucleus);GO:0006364(rRNA processing);GO:0032040(small-subunit processome);GO:0034388(Pwp2p-containing subcomplex of 90S preribosome);GO:0080008(Cul4-RING E3 ubiquitin ligase complex)	03008(Ribosome biogenesis in eukaryotes)	K14554	NA	WD repeat-containing protein 36 [Asparagus officinalis]	NA	6.38433	2.53648	1.86378	2.64255	1.00643	1.27004	2.94911	1.56028	0.0285065	0.898566	up	yes
MSTRG.19329	HHC021812	rna-HHC021812.1	GO:0009507(chloroplast);GO:0009534(chloroplast thylakoid);GO:0009535(chloroplast thylakoid membrane);GO:0009579(thylakoid);GO:0009735(response to cytokinin);GO:0009941(chloroplast envelope);GO:0015078(proton transmembrane transporter activity);GO:0015986(ATP synthesis coupled proton transport);GO:0016020(membrane);GO:0016021(integral component of membrane);GO:0016787(hydrolase activity);GO:004274…	00190(Oxidative phosphorylation);00195(Photosynthesis)	K02109	NA	ATP synthase subunit b', chloroplastic [Phoenix dactylifera]	NA	140.059	152.099	127.827	57.2541	56.7245	55.5274	2.12575	1.08797	0.0285301	0.898566	up	yes
MSTRG.12640	HHC012228	MSTRG.12640.1;rna-HHC012228.1;MSTRG.12640.2	GO:0003333(amino acid transmembrane transport);GO:0005886(plasma membrane);GO:0006865(amino acid transport);GO:0015171(amino acid transmembrane transporter activity);GO:0016020(membrane);GO:0016021(integral component of membrane)	NA	NA	NA	PREDICTED: lysine histidine transporter-like 8 [Elaeis guineensis]	NA	0.104892	0.0865365	0.104745	0.384611	0.763984	0.628578	0.244436	-2.03247	0.0285337	0.898566	down	yes
MSTRG.10003	HHC008450	rna-HHC008450.1	NA	NA	NA	NA		NA	125.84	114.645	29.3614	27.1331	29.0013	27.2209	2.64113	1.40115	0.0285447	0.898566	up	yes
MSTRG.4442	HHC040834	rna-HHC040834.1;MSTRG.4442.2	GO:0004672(protein kinase activity);GO:0004674(protein serine/threonine kinase activity);GO:0005524(ATP binding);GO:0005886(plasma membrane);GO:0006468(protein phosphorylation);GO:0007169(transmembrane receptor protein tyrosine kinase signaling pathway);GO:0016021(integral component of membrane);GO:0016301(kinase activity)	NA	NA	NA	probable inactive receptor kinase At5g58300 [Asparagus officinalis]	NA	6.76496	13.4246	15.0531	5.66784	24.1863	26.9217	0.400237	-1.32107	0.0285508	0.898566	down	yes
MSTRG.34918	HHC053430	rna-HHC053430.1;MSTRG.34918.1	GO:0008152(metabolic process);GO:0010325(raffinose family oligosaccharide biosynthetic process);GO:0047216(inositol 3-alpha-galactosyltransferase activity);GO:0052576(carbohydrate storage);GO:0070417(cellular response to cold)	00052(Galactose metabolism)	K18819	EC:2.4.1.123	galactinol synthase 1-like [Asparagus officinalis]	NA	1354.56	403.981	370.346	208.835	215.536	214.95	2.71522	1.44107	0.0285916	0.898566	up	yes
MSTRG.30614	HHC039076	rna-HHC039076.1	GO:0003674(molecular_function);GO:0005634(nucleus);GO:0043504(mitochondrial DNA repair);GO:0097552(mitochondrial double-strand break repair via homologous recombination)	NA	NA	NA	upstream activation factor subunit UAF30-like [Dendrobium catenatum]	NA	10.1623	7.92252	4.05624	3.6152	3.18767	2.64073	2.20955	1.14375	0.0286516	0.898566	up	yes
MSTRG.30694	HHC039171	MSTRG.30694.1;MSTRG.30694.2;rna-HHC039171.1;MSTRG.30694.3	GO:0004477(methenyltetrahydrofolate cyclohydrolase activity);GO:0004488(methylenetetrahydrofolate dehydrogenase (NADP+) activity);GO:0005829(cytosol);GO:0006730(one-carbon metabolic process)	NA	NA	NA	PREDICTED: glycine-rich protein 2 [Elaeis guineensis]	NA	771.027	778.298	264.247	364.966	327.385	136.36	2.34885	1.23195	0.0286595	0.898566	up	yes
MSTRG.1419	HHC001821	rna-HHC001821.1	GO:0003674(molecular_function);GO:0005634(nucleus);GO:0005737(cytoplasm);GO:0005829(cytosol);GO:0016567(protein ubiquitination);GO:0080037(negative regulation of cytokinin-activated signaling pathway);GO:2000762(regulation of phenylpropanoid metabolic process)	NA	NA	NA	F-box/kelch-repeat protein SKIP20-like [Dendrobium catenatum]	NA	9.36847	6.39025	2.9582	1.69474	1.69234	2.1147	2.68077	1.42265	0.0287085	0.898566	up	yes
MSTRG.31392	HHC040098	rna-HHC040098.1;MSTRG.31392.1;MSTRG.31392.4;MSTRG.31392.3	GO:0003674(molecular_function);GO:0005575(cellular_component);GO:0008150(biological_process)	NA	NA	NA	hypothetical protein LSAT_4X50261 [Lactuca sativa]	NA	518.115	93.0274	1.96964	171.611	957.597	1035.87	0.196824	-2.34502	0.0287138	0.898566	down	yes
MSTRG.30329	HHC038647	rna-HHC038647.1	GO:0003674(molecular_function);GO:0005886(plasma membrane);GO:0008150(biological_process);GO:0016021(integral component of membrane)	NA	NA	NA	uncharacterized protein LOC103709005 [Phoenix dactylifera]	NA	7.97207	1.88889	18.0599	2.54222	2.044	2.18502	3.60167	1.84867	0.0287289	0.898566	up	yes
MSTRG.20281	HHC023126	MSTRG.20281.2;rna-HHC023126.1;MSTRG.20281.3	NA	NA	NA	NA		NA	18.1737	66.6683	89.0606	248.514	292.461	334.542	0.336854	-1.56981	0.0287376	0.898566	down	yes
MSTRG.18856	HHC021165;HHC021157	rna-HHC021165.1;rna-HHC021157.1;MSTRG.18856.3;MSTRG.18856.2;MSTRG.18856.6;MSTRG.18856.4;MSTRG.18856.1	GO:0005829(cytosol);GO:0005886(plasma membrane);GO:0008830(dTDP-4-dehydrorhamnose 3,5-epimerase activity);GO:0008831(dTDP-4-dehydrorhamnose reductase activity);GO:0009506(plasmodesma);GO:0010253(UDP-rhamnose biosynthetic process);GO:0010489(UDP-4-keto-6-deoxy-glucose-3,5-epimerase activity);GO:0010490(UDP-4-keto-rhamnose-4-keto-reductase activity);GO:0019305(dTDP-rhamnose biosynthetic process);GO…	00520(Amino sugar and nucleotide sugar metabolism);00523(Polyketide sugar unit biosynthesis);00523(Polyketide sugar unit biosynthesis)	K12451	EC:5.1.3.-;EC:1.1.1.-	UER1 protein [Ornithogalum longebracteatum]	NA	102.251	45.9078	31.9554	18.0388	24.0123	16.0322	2.47415	1.30693	0.0287656	0.898566	up	yes
MSTRG.24061	HHC028985	rna-HHC028985.1	GO:0003674(molecular_function);GO:0005634(nucleus);GO:0080167(response to karrikin)	NA	NA	NA	hypothetical protein COLO4_29740 [Corchorus olitorius]	NA	170.681	107.419	39.773	37.9923	33.9341	38.831	2.4453	1.29001	0.0287701	0.898566	up	yes
MSTRG.16267	HHC017337	rna-HHC017337.2;rna-HHC017337.1	GO:0005507(copper ion binding);GO:0005730(nucleolus);GO:0005739(mitochondrion);GO:0005753(mitochondrial proton-transporting ATP synthase complex);GO:0008270(zinc ion binding);GO:0009507(chloroplast);GO:0009555(pollen development);GO:0016020(membrane);GO:0045263(proton-transporting ATP synthase complex, coupling factor F(o));GO:0050897(cobalt ion binding);GO:0050897(cobalt ion binding)	NA	NA	NA	probable ATP synthase 24 kDa subunit, mitochondrial [Asparagus officinalis]	NA	16.188	9.2018	16.5027	4.61814	5.09314	5.38324	2.21978	1.15042	0.028792	0.898566	up	yes
MSTRG.31177	HHC039814	MSTRG.31177.1;rna-HHC039814.1	GO:0043161(proteasome-mediated ubiquitin-dependent protein catabolic process);GO:0061630(ubiquitin protein ligase activity)	NA	NA	NA	RING-H2 finger protein ATL54-like [Phalaenopsis equestris]	NA	9.76081	5.20308	2.46362	1.61639	0.990907	1.73665	3.49103	1.80365	0.0288299	0.898566	up	yes
MSTRG.2382	HHC003217	rna-HHC003217.1	GO:0005576(extracellular region);GO:0016021(integral component of membrane);GO:0016757(transferase activity, transferring glycosyl groups)	00514(Other types of O-glycan biosynthesis)	K18134	EC:2.4.1.255	EGF domain-specific O-linked N-acetylglucosamine transferase-like [Asparagus officinalis]	NA	146.873	108.036	10.6245	20.6495	20.6131	20.5461	3.47654	1.79765	0.0288363	0.898566	up	yes
MSTRG.12920	HHC012791	rna-HHC012791.2;rna-HHC012791.1	GO:0005576(extracellular region);GO:0009823(cytokinin catabolic process);GO:0016491(oxidoreductase activity);GO:0016614(oxidoreductase activity, acting on CH-OH group of donors);GO:0019139(cytokinin dehydrogenase activity);GO:0050660(flavin adenine dinucleotide binding);GO:0055114(oxidation-reduction process);GO:0055114(oxidation-reduction process)	00908(Zeatin biosynthesis);00908(Zeatin biosynthesis)	K00279	EC:1.5.99.12	PREDICTED: cytokinin dehydrogenase 11-like [Elaeis guineensis]	NA	2.39362	1.5473	1.47676	0.628037	0.627647	0.42992	2.85832	1.51517	0.0288842	0.89861	up	yes
MSTRG.30988	HHC039566	rna-HHC039566.1	GO:0000209(protein polyubiquitination);GO:0043161(proteasome-mediated ubiquitin-dependent protein catabolic process);GO:0061630(ubiquitin protein ligase activity)	NA	NA	NA	PREDICTED: E3 ubiquitin-protein ligase RING1-like [Elaeis guineensis]	NA	21.993	22.0644	95.956	19.4173	14.9622	15.2595	2.63768	1.39927	0.0289357	0.89861	up	yes
MSTRG.17759	HHC019457	rna-HHC019457.1	GO:0008422(beta-glucosidase activity);GO:1901657(glycosyl compound metabolic process)	00500(Starch and sucrose metabolism);00460(Cyanoamino acid metabolism);00940(Phenylpropanoid biosynthesis)	K01188	EC:3.2.1.21	beta-glucosidase 31-like isoform X1 [Asparagus officinalis]	NA	51.8504	28.3881	23.8236	13.9352	12.5498	14.593	2.17363	1.12011	0.0289494	0.89861	up	yes
MSTRG.28904	HHC036473	rna-HHC036473.1	GO:0003677(DNA binding);GO:0003700(DNA binding transcription factor activity);GO:0005622(intracellular);GO:0005634(nucleus);GO:0006351(transcription, DNA-templated);GO:0006355(regulation of transcription, DNA-templated);GO:0006952(defense response);GO:0009873(ethylene-activated signaling pathway);GO:0016020(membrane);GO:0019760(glucosinolate metabolic process);GO:0043565(sequence-specific DNA bin…	NA	NA	NA	Ethylene-responsive transcription factor 3 [Vitis vinifera]	NA	0.693354	1.56675	9.50189	1.2116	0.956314	0.262639	5.32162	2.41186	0.0289509	0.89861	up	yes
MSTRG.10181	HHC008722	MSTRG.10181.1	NA	NA	NA	NA		NA	18.2736	5.75935	3.492	1.23171	1.987	1.77974	3.81718	1.93251	0.0290772	0.900447	up	yes
MSTRG.24092	HHC029036	rna-HHC029036.1	GO:0005737(cytoplasm);GO:0005794(Golgi apparatus);GO:0009055(electron transfer activity);GO:0016491(oxidoreductase activity);GO:0055114(oxidation-reduction process)	NA	NA	NA	apoptosis-inducing factor homolog B-like [Asparagus officinalis]	NA	0.639469	0.918474	1.25952	4.36836	8.41134	5.41542	0.259852	-1.94424	0.0290871	0.900447	down	yes
MSTRG.32671	HHC049809	MSTRG.32671.1;MSTRG.32671.3;rna-HHC049809.1	GO:0004674(protein serine/threonine kinase activity);GO:0005634(nucleus);GO:0046777(protein autophosphorylation)	NA	NA	NA	uncharacterized protein LOC109834721 [Asparagus officinalis]	NA	13.4904	6.6299	3.21166	1.81525	1.18549	2.34554	3.5609	1.83224	0.0290952	0.900447	up	yes
gene-HHC009757	HHC009757	rna-HHC009757.1	GO:0003779(actin binding);GO:0005829(cytosol);GO:0005886(plasma membrane);GO:0007010(cytoskeleton organization);GO:0007163(establishment or maintenance of cell polarity);GO:0007165(signal transduction);GO:0008154(actin polymerization or depolymerization);GO:0008179(adenylate cyclase binding);GO:0009826(unidimensional cell growth);GO:0030036(actin cytoskeleton organization);GO:0030864(cortical act…	NA	NA	NA	cyclase-associated protein 1-like isoform X1 [Asparagus officinalis]	NA	9.39635	4.30113	3.69295	4.21209	1.36645	1.64338	3.58866	1.84344	0.029144	0.90108	up	yes
MSTRG.13021	HHC012993	MSTRG.13021.1	NA	NA	NA	NA		NA	5.67598	3.76741	0.0001	0.529359	0.219374	0.176118	12.6082	3.65629	0.0293281	0.902458	up	yes
MSTRG.8612	HHC047245	rna-HHC047245.2;MSTRG.8612.3;rna-HHC047245.1	GO:0003756(protein disulfide isomerase activity);GO:0005783(endoplasmic reticulum);GO:0006457(protein folding);GO:0034976(response to endoplasmic reticulum stress);GO:0034976(response to endoplasmic reticulum stress)	04141(Protein processing in endoplasmic reticulum);04141(Protein processing in endoplasmic reticulum)	K09580	EC:5.3.4.1	protein disulfide-isomerase-like [Asparagus officinalis];protein disulfide-isomerase-like [Phoenix dactylifera]	NA	24.2501	61.976	37.0693	37.7839	102.1	92.1561	0.414606	-1.27019	0.0293515	0.902458	down	yes
MSTRG.1418	HHC001819	rna-HHC001819.1	GO:0004842(ubiquitin-protein transferase activity);GO:0031463(Cul3-RING ubiquitin ligase complex)	NA	NA	NA	F-box/kelch-repeat protein SKIP20-like [Dendrobium catenatum]	NA	11.5646	4.69542	6.17348	2.42684	2.66035	2.77912	2.28518	1.19231	0.0293545	0.902458	up	yes
MSTRG.32082	HHC048392	MSTRG.32082.2;rna-HHC048392.1	GO:0005634(nucleus)	04075(Plant hormone signal transduction);04712(Circadian rhythm - plant)	K12126	NA	transcription factor PIF3-like [Asparagus officinalis]	NA	1.40741	1.64664	1.69441	3.46548	5.14204	4.75095	0.415139	-1.26833	0.0293828	0.902458	down	yes
MSTRG.8548	HHC047123	rna-HHC047123.1;MSTRG.8548.1	NA	NA	NA	NA	PREDICTED: abscisic stress-ripening protein 2 [Beta vulgaris subsp. vulgaris]	NA	7.95793	2.50763	2.65578	1.77211	1.02556	1.30688	3.19268	1.67477	0.0294185	0.902458	up	yes
MSTRG.29707	HHC037643	rna-HHC037643.1	GO:0009416(response to light stimulus);GO:0009535(chloroplast thylakoid membrane);GO:0009768(photosynthesis, light harvesting in photosystem I);GO:0009941(chloroplast envelope);GO:0010287(plastoglobule);GO:0016168(chlorophyll binding);GO:0031409(pigment binding)	00196(Photosynthesis - antenna proteins)	K08915	NA	putative chlorophyll A-B binding protein [Medicago truncatula]	NA	12403.1	15664.8	17937.2	5731.28	5919.77	5975.25	2.17471	1.12082	0.0294384	0.902458	up	yes
MSTRG.32975	HHC047357	rna-HHC047357.1;MSTRG.32975.1	GO:0046740(transport of virus in host, cell to cell)	NA	NA	NA	OBERON-like protein [Asparagus officinalis]	NA	162.484	37.6986	32.2966	23.8099	26.4457	16.1191	3.01057	1.59004	0.0294413	0.902458	up	yes
MSTRG.28602	HHC036059	rna-HHC036059.1	GO:0000103(sulfate assimilation);GO:0006457(protein folding);GO:0009507(chloroplast);GO:0015035(protein disulfide oxidoreductase activity);GO:0016671(oxidoreductase activity, acting on a sulfur group of donors, disulfide as acceptor);GO:0034599(cellular response to oxidative stress);GO:0045454(cell redox homeostasis)	NA	NA	NA	thioredoxin X, chloroplastic, partial [Asparagus officinalis]	NA	402.765	347.336	382.28	161.961	151.553	160.47	2.07412	1.0525	0.0294688	0.902458	up	yes
MSTRG.11446	HHC010610;HHC010600	rna-HHC010610.1;rna-HHC010600.1;MSTRG.11446.3;MSTRG.11446.2	GO:0005737(cytoplasm);GO:0016651(oxidoreductase activity, acting on NAD(P)H);GO:0055114(oxidation-reduction process);GO:0055114(oxidation-reduction process)	NA	NA	NA	isoflavone reductase-like protein [Asparagus officinalis]	NA	49.006	270.977	300.346	48.6867	54.7952	57.4577	2.97995	1.57529	0.0294817	0.902458	up	yes
gene-HHC029775	HHC029775	rna-HHC029775.1	GO:0005829(cytosol);GO:0008964(phosphoenolpyruvate carboxylase activity);GO:0009507(chloroplast);GO:0048046(apoplast);GO:0048366(leaf development)	00740(Riboflavin metabolism)	K20884	EC:2.7.1.26;EC:3.1.3.102	PREDICTED: bifunctional riboflavin kinase/FMN phosphatase [Elaeis guineensis]	NA	2.53575	6.18783	0.86676	0.406488	0.521834	0.0001	9.57673	3.25953	0.0294967	0.902458	up	yes
MSTRG.35393	HHC052318	MSTRG.35393.1;rna-HHC052318.1	GO:0000795(synaptonemal complex);GO:0003697(single-stranded DNA binding);GO:0005712(chiasma);GO:0006298(mismatch repair);GO:0016887(ATPase activity);GO:0032389(MutLalpha complex)	03430(Mismatch repair)	K08734	NA	LOW QUALITY PROTEIN: DNA mismatch repair protein MLH1 [Asparagus officinalis]	NA	4.00729	4.18402	2.21228	1.62583	0.934569	1.1521	2.88244	1.52729	0.0295296	0.902458	up	yes
MSTRG.33506	HHC054040	rna-HHC054040.1	GO:0003735(structural constituent of ribosome);GO:0022625(cytosolic large ribosomal subunit)	03010(Ribosome)	K02930	NA	hypothetical protein B296_00026414 [Ensete ventricosum]	NA	14.1842	8.54523	12.8665	5.39439	5.07698	4.92213	2.0497	1.03541	0.0295698	0.902818	up	yes
MSTRG.23681	HHC028487;HHC028484	MSTRG.23681.8;rna-HHC028487.1;rna-HHC028484.1;MSTRG.23681.2;MSTRG.23681.5;MSTRG.23681.6;MSTRG.23681.7;MSTRG.23681.4;MSTRG.23681.1	GO:0033855(nicotianamine aminotransferase activity);GO:0004838(L-tyrosine:2-oxoglutarate aminotransferase activity);GO:0005737(cytoplasm);GO:0005829(cytosol);GO:0006572(tyrosine catabolic process);GO:0008483(transaminase activity);GO:0009058(biosynthetic process);GO:0010189(vitamin E biosynthetic process);GO:0030170(pyridoxal phosphate binding)	00270(Cysteine and methionine metabolism);00350(Tyrosine metabolism);00360(Phenylalanine metabolism);00400(Phenylalanine, tyrosine and tryptophan biosynthesis);00130(Ubiquinone and other terpenoid-quinone biosynthesis);00950(Isoquinoline alkaloid biosynthesis);00960(Tropane, piperidine and pyridine alkaloid biosynthesis);00960(Tropane, piperidine and pyridine alkaloid biosynthesis)	K00815	EC:2.6.1.5	nicotianamine aminotransferase A-like isoform X1 [Asparagus officinalis]	NA	19.9789	9.28176	1.74716	2.90574	2.73313	2.03488	3.55637	1.83041	0.0296006	0.902888	up	yes
MSTRG.12511	HHC012027	MSTRG.12511.3;MSTRG.12511.1;MSTRG.12511.2	NA	NA	NA	NA		NA	0.511402	81.5117	0.419222	1.29117	1.58797	1.40672	13.9803	3.80532	0.0296318	0.902974	up	yes
MSTRG.1043		MSTRG.1043.1	NA	NA	NA	NA		NA	4.87832	15.1229	5.20904	37.9574	43.5719	47.1903	0.347985	-1.5229	0.0296652	0.903126	down	yes
MSTRG.14734	HHC015409	rna-HHC015409.1	GO:0003674(molecular_function);GO:0005634(nucleus);GO:0008150(biological_process)	03018(RNA degradation)	K12592	NA	nuclear nucleic acid-binding protein C1D [Asparagus officinalis]	NA	0.831318	0.986338	0.796153	0.176681	0.1222	0.183664	4.56165	2.18956	0.0297374	0.903504	up	yes
MSTRG.10019		MSTRG.10019.1	NA	NA	NA	NA		NA	5.1028	4.42112	3.01624	6.08358	12.7411	18.3076	0.299912	-1.73739	0.0297443	0.903504	down	yes
MSTRG.16515	HHC017693	MSTRG.16515.1;rna-HHC017693.1	GO:0003674(molecular_function);GO:0005739(mitochondrion);GO:0008150(biological_process);GO:0009922(fatty acid elongase activity);GO:0016021(integral component of membrane);GO:0042761(very long-chain fatty acid biosynthetic process)	00062(Fatty acid elongation)	K10249	EC:2.3.1.199	elongation of fatty acids protein 3-like [Phoenix dactylifera]	NA	12.007	4.7158	10.829	3.29063	3.65918	2.82945	2.37665	1.24893	0.029763	0.903504	up	yes
MSTRG.21047		MSTRG.21047.1	NA	NA	NA	NA		NA	3.64543	7.96642	12.5724	16.9901	31.8851	23.2646	0.373296	-1.42161	0.0299255	0.90721	down	yes
MSTRG.5736	HHC042882	rna-HHC042882.1	GO:0000981(RNA polymerase II transcription factor activity, sequence-specific DNA binding);GO:0001135(transcription factor activity, RNA polymerase II transcription factor recruiting);GO:0003677(DNA binding);GO:0003700(DNA binding transcription factor activity);GO:0005515(protein binding);GO:0005634(nucleus);GO:0006351(transcription, DNA-templated);GO:0006357(regulation of transcription by RNA po…	NA	NA	NA	PREDICTED: myb-related protein Hv1-like [Elaeis guineensis]	NA	96.985	114.964	227.346	53.4184	57.5562	53.1272	2.22578	1.15431	0.0299422	0.90721	up	yes
MSTRG.34181	HHC049401	rna-HHC049401.1	GO:0005515(protein binding);GO:0015112(nitrate transmembrane transporter activity);GO:0015706(nitrate transport)	NA	NA	NA	PREDICTED: high-affinity nitrate transporter-activating protein 2.1 [Elaeis guineensis]	NA	18.3638	2.45783	0.347058	0.410128	0.499986	0.747227	8.6508	3.11283	0.0300328	0.907606	up	yes
MSTRG.5854	HHC043054	rna-HHC043054.1	GO:0003674(molecular_function);GO:0005777(peroxisome);GO:0005829(cytosol);GO:0008150(biological_process);GO:0009507(chloroplast);GO:0009570(chloroplast stroma)	04146(Peroxisome)	K13346	NA	stress-response A/B barrel domain-containing protein UP3 [Phoenix dactylifera]	NA	9.48312	8.07693	6.45886	2.70804	3.41639	2.46551	2.27196	1.18394	0.030043	0.907606	up	yes
MSTRG.28545	HHC035987	rna-HHC035987.1;MSTRG.28545.1	GO:0005524(ATP binding);GO:0005737(cytoplasm);GO:0005739(mitochondrion);GO:0005829(cytosol);GO:0009506(plasmodesma);GO:0009507(chloroplast);GO:0009570(chloroplast stroma);GO:0009735(response to cytokinin);GO:0010030(positive regulation of seed germination);GO:0010214(seed coat development);GO:0016208(AMP binding);GO:0033611(oxalate catabolic process);GO:0046686(response to cadmium ion);GO:0048046…	00630(Glyoxylate and dicarboxylate metabolism)	K22133	EC:6.2.1.8	4-coumarate:CoA ligase-like protein [Ornithogalum longebracteatum]	NA	70.164	36.5696	5.55629	9.62389	9.60177	8.99708	3.27745	1.71258	0.0301092	0.907606	up	yes
MSTRG.1428		MSTRG.1428.1	NA	NA	NA	NA		NA	1.16764	17.0095	16.9019	1.53189	1.54786	2.28903	4.7709	2.25426	0.0301397	0.907606	up	yes
MSTRG.35767	HHC053002	rna-HHC053002.1	GO:0003677(DNA binding);GO:0003700(DNA binding transcription factor activity);GO:0005515(protein binding);GO:0005634(nucleus);GO:0005737(cytoplasm);GO:0006351(transcription, DNA-templated);GO:0006355(regulation of transcription, DNA-templated);GO:0009651(response to salt stress);GO:0009873(ethylene-activated signaling pathway);GO:0043565(sequence-specific DNA binding);GO:0045893(positive regulati…	NA	NA	NA	hypothetical protein GW17_00059386, partial [Ensete ventricosum]	NA	1.30988	1.52651	3.14817	0.706195	0.719648	0.529014	2.67917	1.42179	0.0301713	0.907606	up	yes
MSTRG.16841	HHC018124	MSTRG.16841.1	NA	NA	NA	NA		NA	0.324583	0.269086	0.414446	0.149649	0.0926791	0.0407445	4.33868	2.11725	0.030192	0.907606	up	yes
MSTRG.28606	HHC036061	rna-HHC036061.1;MSTRG.28606.1;MSTRG.28606.2	GO:0003677(DNA binding);GO:0003700(DNA binding transcription factor activity);GO:0005515(protein binding);GO:0005634(nucleus);GO:0006351(transcription, DNA-templated);GO:0006355(regulation of transcription, DNA-templated);GO:0042752(regulation of circadian rhythm);GO:0043433(negative regulation of DNA binding transcription factor activity);GO:0048511(rhythmic process)	04712(Circadian rhythm - plant)	K16221	NA	transcription factor TCP7-like [Phoenix dactylifera]	NA	2.37399	2.20955	3.46763	1.95887	1.06001	1.16014	2.25436	1.17272	0.0302016	0.907606	up	yes
MSTRG.2283	HHC003057	rna-HHC003057.2;rna-HHC003057.3;rna-HHC003057.1;rna-HHC003057.4	GO:0003677(DNA binding);GO:0003700(DNA binding transcription factor activity);GO:0005634(nucleus);GO:0006351(transcription, DNA-templated);GO:0006355(regulation of transcription, DNA-templated);GO:0009506(plasmodesma);GO:0009567(double fertilization forming a zygote and endosperm);GO:0046983(protein dimerization activity);GO:0046983(protein dimerization activity)	04075(Plant hormone signal transduction);04712(Circadian rhythm - plant);04712(Circadian rhythm - plant)	K12126;K16189	NA	unnamed protein product [Brassica oleracea];PREDICTED: transcription factor UNE10-like isoform X4 [Elaeis guineensis];putative transcription factor bHLH family [Rosa chinensis]	NA	18.4328	13.1253	13.2117	8.00727	5.30082	7.75009	2.02197	1.01576	0.0302297	0.907606	up	yes
MSTRG.11470	HHC010641	rna-HHC010641.1	NA	NA	NA	NA	PREDICTED: uncharacterized protein LOC105056284 [Elaeis guineensis]	NA	11.8898	15.6442	95.877	10.5163	9.85756	10.4116	3.30372	1.72409	0.030238	0.907606	up	yes
MSTRG.4216	HHC006137;HHC006154	rna-HHC006137.2;MSTRG.4216.1;rna-HHC006154.1;rna-HHC006137.1	GO:0003735(structural constituent of ribosome);GO:0006412(translation);GO:0006412(translation)	NA	NA	NA	PREDICTED: mitochondrial uncoupling protein 1-like [Musa acuminata subsp. malaccensis];uncoupling protein a [Symplocarpus renifolius]	NA	40.9601	45.0666	18.6423	20.0116	15.7143	14.6371	2.05395	1.0384	0.0302421	0.907606	up	yes
MSTRG.17777	HHC019488	MSTRG.17777.4;rna-HHC019488.2;rna-HHC019488.1;MSTRG.17777.3;MSTRG.17777.5	GO:0003723(RNA binding);GO:0003723(RNA binding)	NA	NA	NA	heterogeneous nuclear ribonucleoprotein Q-like [Asparagus officinalis]	NA	19.8717	7.04205	9.62183	9.16205	5.23944	5.8091	2.06804	1.04826	0.0303986	0.907606	up	yes
MSTRG.3609		MSTRG.3609.1	NA	NA	NA	NA		NA	6.71907	0.285105	0.395022	0.487205	0.386011	0.214213	6.56955	2.71579	0.0303994	0.907606	up	yes
MSTRG.16165	HHC017202	rna-HHC017202.1	GO:0004392(heme oxygenase (decyclizing) activity);GO:0005515(protein binding);GO:0006788(heme oxidation);GO:0009507(chloroplast);GO:0009585(red, far-red light phototransduction);GO:0009813(flavonoid biosynthetic process);GO:0010019(chloroplast-nucleus signaling pathway);GO:0010024(phytochromobilin biosynthetic process);GO:0010075(regulation of meristem growth);GO:0010119(regulation of stomatal mo…	00860(Porphyrin and chlorophyll metabolism)	K21480	EC:1.14.15.20	heme oxygenase 1, chloroplastic-like [Asparagus officinalis]	NA	181.012	127.598	105.545	45.4611	52.6667	51.6792	2.20236	1.13905	0.0304012	0.907606	up	yes
MSTRG.22822	HHC027288	MSTRG.22822.2;rna-HHC027288.1	GO:0003777(microtubule motor activity);GO:0005871(kinesin complex);GO:0007018(microtubule-based movement);GO:0016887(ATPase activity)	NA	NA	NA	hypothetical protein DVH24_022612 [Malus domestica]	NA	2.11397	12.0473	0.742854	1.50496	0.909747	0.745646	4.95625	2.30925	0.0304012	0.907606	up	yes
MSTRG.6545	HHC043999	MSTRG.6545.1	NA	NA	NA	NA		NA	5.99856	3.78442	2.28731	1.51327	0.755418	1.14419	3.57536	1.83809	0.0304114	0.907606	up	yes
MSTRG.34917	HHC053429	rna-HHC053429.1	GO:0005739(mitochondrion);GO:0005777(peroxisome);GO:0008935(1,4-dihydroxy-2-naphthoyl-CoA synthase activity);GO:0009234(menaquinone biosynthetic process);GO:0042371(vitamin K biosynthetic process)	00130(Ubiquinone and other terpenoid-quinone biosynthesis)	K01661	EC:4.1.3.36	1,4-dihydroxy-2-naphthoyl-CoA synthase, peroxisomal-like [Phoenix dactylifera]	NA	126.644	93.8362	160.824	72.0535	8.98654	75.8406	2.67225	1.41805	0.0304634	0.907606	up	yes
[truncated: 480 more rows]

## Sheet: DEGs in roots
The DEGs identified in roots of H. fulva under NaCl treatment
gene_id	gene_name	transcript_id	GO	KEGG	KO_ENTRY	EC	Description	trans_type	FPKM.NaCl_root_1	FPKM.NaCl_root_2	FPKM.NaCl_root_3	FPKM.NT_root_1	FPKM.NT_root_2	FPKM.NT_root_3	fc	log2(fc)	pval	qval	regulation	significant
[truncated: 12,691 more rows]
