# Supplementary material for: Integration of mRNA and miRNA Analysis Reveals the Post-Transcriptional Regulation of Salt Stress Response in Hemerocallis fulva
Source: Int J Mol Sci. 2023 Apr 14;24(8):7290. doi: 10.3390/ijms24087290 (PMC10139057; doi:10.3390/ijms24087290)
Supplement: Supplementary file 1 [file ijms-24-07290-s001.zip › Table S10.xlsx]

## Sheet: Genes enrichment in leaves
Table S10 KEGG enrichment genes in leaves
pathway_id	pathway_name	pvalue	Gene_ID	Gene_name	KO_ENTRY	EC	Description	FPKM.NaCl_leaf_1	FPKM.NaCl_leaf_2	FPKM.NaCl_leaf_3	FPKM.NT_leaf_3	FPKM.NT_leaf_1	FPKM.NT_leaf_2	fc	log2(fc)	regulation
ko00195	Photosynthesis	1.72854e-06	MSTRG.14209	HHC014677	K02109	NA	ATP synthase CF0 subunit I (chloroplast) [Anemarrhena asphodeloides]	12.7751	0.41871	0.3965	0.597432	0.432373	0.681303	6.36976	2.67124	up
ko00195	Photosynthesis	1.72854e-06	MSTRG.1782	HHC002317	K02113	NA	PREDICTED: ATP synthase subunit delta, chloroplastic-like [Musa acuminata subsp. malaccensis]	1414.88	1293.38	1145.74	460.775	467.277	465.335	2.31327	1.20994	up
ko00195	Photosynthesis	1.72854e-06	MSTRG.19329	HHC021812	K02109	NA	ATP synthase subunit b', chloroplastic [Phoenix dactylifera]	140.059	152.099	127.827	57.2541	56.7245	55.5274	2.12575	1.08797	up
ko00195	Photosynthesis	1.72854e-06	MSTRG.1972	HHC002584	K08905	NA	hypothetical protein GW17_00046665 [Ensete ventricosum]	3665.95	3856.43	3425.01	1429.63	1503.12	1461.64	2.08736	1.06168	up
ko00195	Photosynthesis	1.72854e-06	MSTRG.23228	HHC027877	K03541	NA	chloroplast photosystem II 10 kDa protein [Agave tequilana]	76.4568	31.7825	7.97919	2.01668	1.90045	1.92397	15.4579	3.95027	up
ko00195	Photosynthesis	1.72854e-06	MSTRG.24217	HHC029219	K02701	NA	photosystem I reaction center subunit N, chloroplastic [Asparagus officinalis]	209.646	367.773	474.442	147.157	145.289	151.85	2.0176	1.01264	up
ko00195	Photosynthesis	1.72854e-06	MSTRG.24525	HHC029606	K02699	NA	photosystem I reaction center subunit XI, chloroplastic [Citrus clementina]	2417.43	1704.88	3008.11	851.309	869.955	873.55	2.28899	1.19471	up
ko00195	Photosynthesis	1.72854e-06	MSTRG.24640	HHC029744	K02695	NA	photosystem I reaction center subunit VI-1, chloroplastic [Asparagus officinalis]	338.311	395.297	456.311	103.558	114.133	113.886	2.83633	1.50403	up
ko00195	Photosynthesis	1.72854e-06	MSTRG.25721	HHC031502	K02113	NA	ATP synthase subunit delta, chloroplastic [Ananas comosus]	46.2239	26.911	60.3547	14.4762	18.1551	14.6731	2.25364	1.17226	up
ko00195	Photosynthesis	1.72854e-06	MSTRG.26426	HHC032689	K02692	NA	PREDICTED: photosystem I reaction center subunit II, chloroplastic-like isoform X2 [Lupinus angustifolius]	1662.45	2044.25	1852.84	642.278	665.323	655.161	2.34831	1.23162	up
ko00195	Photosynthesis	1.72854e-06	MSTRG.28902	HHC036470	K02721	NA	PREDICTED: photosystem II reaction center W protein, chloroplastic-like [Elaeis guineensis]	1965.81	1635.59	2137.38	798.53	727.308	741.076	2.22602	1.15447	up
ko00195	Photosynthesis	1.72854e-06	MSTRG.31982	HHC049039	K08905	NA	hypothetical protein GW17_00046665 [Ensete ventricosum]	1319.34	1399.06	1941.01	586.306	620.001	565.869	2.21176	1.14519	up
ko00195	Photosynthesis	1.72854e-06	MSTRG.33564	HHC051352	K02109	NA	ATP synthase subunit b', chloroplastic [Phoenix dactylifera]	505.889	463.967	532.358	181.349	170.842	169.671	2.4721	1.30574	up
ko00195	Photosynthesis	1.72854e-06	MSTRG.34201	HHC049231	K02698	NA	PREDICTED: photosystem I reaction center subunit psaK, chloroplastic [Elaeis guineensis]	2255.47	3219.69	3102.97	1103.33	1138.05	1142.44	2.12267	1.08588	up
ko00195	Photosynthesis	1.72854e-06	MSTRG.35356	HHC050458	K02701	NA	photosystem I reaction center subunit N, chloroplastic [Asparagus officinalis]	99.0288	80.769	132.897	44.1685	18.3185	39.5277	3.08458	1.62508	up
ko00195	Photosynthesis	1.72854e-06	MSTRG.35815	HHC049157	K02693	NA	photosystem I reaction center subunit IV A [Panicum miliaceum]	3369.42	3829.84	5508.51	1630.04	1647.6	1669.6	2.16114	1.11179	up
ko00195	Photosynthesis	1.72854e-06	MSTRG.9705	HHC007798	K02634	NA	chloroplast envelope membrane protein (chloroplast) [Anemarrhena asphodeloides]	32.2807	0.302536	0.903987	1.30492	1.47665	0.86084	7.44221	2.89573	up
ko00195	Photosynthesis	1.72854e-06	MSTRG.972	HHC001189	K02108	NA	ATP synthase subunit a, chloroplastic [Triticum urartu]	59.6918	5.17368	6.82411	4.82922	4.60486	4.58509	4.16318	2.05769	up
ko00750	Vitamin B6 metabolism	2.93029e-06	MSTRG.16389	HHC017477	K17744;K05275	EC:1.1.1.316;EC:1.1.1.65	probable aldo-keto reductase 1 [Phoenix dactylifera];PREDICTED: probable aldo-keto reductase 1 [Elaeis guineensis]	190.086	61.5386	29.1413	21.9399	13.1192	20.4253	4.512	2.17377	up
ko00750	Vitamin B6 metabolism	2.93029e-06	MSTRG.19507	HHC022060	K05275	EC:1.1.1.65	uncharacterized oxidoreductase At1g06690, chloroplastic-like [Asparagus officinalis]	282.407	203.585	199.381	79.7619	96.145	92.4747	2.02825	1.02023	up
ko00750	Vitamin B6 metabolism	2.93029e-06	MSTRG.28519	HHC035945	K08681	EC:4.3.3.6	probable pyridoxal 5'-phosphate synthase subunit PDX2 [Asparagus officinalis]	416.087	522.981	335.058	159.485	144.389	159.258	2.36065	1.23919	up
ko00750	Vitamin B6 metabolism	2.93029e-06	MSTRG.2871	HHC004000	K06215	EC:4.3.3.6	hypothetical protein B296_00046320 [Ensete ventricosum];PREDICTED: probable pyridoxal 5'-phosphate synthase subunit PDX1 [Lupinus angustifolius]	1457.65	503.961	470.873	235.772	199.127	190.738	3.42203	1.77485	up
ko00750	Vitamin B6 metabolism	2.93029e-06	MSTRG.34374	HHC052415	K01733	EC:4.2.3.1	LOW QUALITY PROTEIN: threonine synthase, chloroplastic-like [Asparagus officinalis]	8.56875	9.12659	9.23811	4.81495	4.28905	2.42522	2.36425	1.24138	up
ko00750	Vitamin B6 metabolism	2.93029e-06	MSTRG.7007	HHC044623	K13248	EC:3.1.3.74	inorganic pyrophosphatase 2 [Phoenix dactylifera]	1.92031	4.09385	0.0001	0.0001	0.0001	0.0001	15035.9	13.8761	up
ko00750	Vitamin B6 metabolism	2.93029e-06	MSTRG.7008	HHC044624	K13248	EC:3.1.3.74	inorganic pyrophosphatase 2 [Phoenix dactylifera]	24.6654	18.1582	0.0001	0.0001	0.267824	0.518981	27.2137	4.76626	up
ko00920	Sulfur metabolism	6.47427e-06	MSTRG.11782	HHC011078	K01739	EC:2.5.1.48	uncharacterized protein A4U43_C03F17520 [Asparagus officinalis]	14.3254	6.34422	9.35239	2.79686	2.89253	2.22422	3.207	1.68123	up
ko00920	Sulfur metabolism	6.47427e-06	MSTRG.13472	HHC013661	K05907	EC:1.8.4.9	5'-adenylylsulfate reductase [Polygonatum pubescens]	43.9854	261.103	441.716	63.7455	71.0336	67.035	2.93532	1.55352	up
ko00920	Sulfur metabolism	6.47427e-06	MSTRG.15026	HHC015774	K13811	EC:2.7.7.4;EC:2.7.1.25	ATP-sulfurylase [Allium cepa]	5.38357	44.5817	90.2161	11.4356	12.6451	11.9036	3.08809	1.62672	up
ko00920	Sulfur metabolism	6.47427e-06	MSTRG.18274	HHC020411	K00640	EC:2.3.1.30	PREDICTED: probable serine acetyltransferase 2 [Elaeis guineensis];probable serine acetyltransferase 2 isoform X1 [Asparagus officinalis]	2.00713	2.14468	2.61632	0.640896	0.0676856	0.1682	15.7047	3.97313	up
ko00920	Sulfur metabolism	6.47427e-06	MSTRG.23986	HHC028878	K01738	EC:2.5.1.47	cysteine synthase [Phoenix dactylifera]	354.41	256.341	138.818	32.9132	30.2249	37.8544	5.74685	2.52277	up
ko00920	Sulfur metabolism	6.47427e-06	MSTRG.24964	HHC030212	K05907	EC:1.8.4.9	5'-adenylylsulfate reductase [Polygonatum pubescens]	14.429	85.221	155.201	15.7656	13.7661	14.8665	4.72567	2.24052	up
ko00920	Sulfur metabolism	6.47427e-06	MSTRG.29915	HHC037982	K05907	EC:1.8.4.9	5'-adenylylsulfate reductase [Polygonatum pubescens]	12.3653	66.8215	73.714	7.20803	6.51252	6.75016	6.03607	2.59361	up
ko00920	Sulfur metabolism	6.47427e-06	MSTRG.32972	HHC047350	K00640	EC:2.3.1.30	PREDICTED: serine acetyltransferase 1, chloroplastic [Elaeis guineensis]	25.0356	13.0092	31.3148	7.18698	6.30061	5.09348	3.35905	1.74805	up
ko00920	Sulfur metabolism	6.47427e-06	MSTRG.33387	HHC048165	K00640	EC:2.3.1.30	probable serine acetyltransferase 2 isoform X1 [Asparagus officinalis]	3.61288	6.08166	3.47292	2.04839	1.59883	1.67633	2.32292	1.21594	up
ko00920	Sulfur metabolism	6.47427e-06	MSTRG.34685	HHC053011	K05907	EC:1.8.4.9	5'-adenylylsulfate reductase [Polygonatum pubescens]	16.0687	166.875	188.862	21.965	20.414	22.3557	4.60338	2.20269	up
ko00920	Sulfur metabolism	6.47427e-06	MSTRG.36160	HHC049451	K01738	EC:2.5.1.47	cysteine synthase-like [Asparagus officinalis]	189.018	195.77	99.13	51.8892	55.1899	46.3818	2.63758	1.39922	up
ko00480	Glutathione metabolism	0.00094278	MSTRG.12506	HHC012021	K18592	EC:2.3.2.2;EC:3.4.19.13	glutathione hydrolase 1-like isoform X1 [Ziziphus jujuba]	2.89181	42.5227	2.69095	3.29626	2.96713	3.32367	4.08547	2.0305	up
ko00480	Glutathione metabolism	0.00094278	MSTRG.12541	HHC012063	K00799	EC:2.5.1.18	probable glutathione S-transferase parA [Asparagus officinalis]	5.89448	1.16417	0.812996	0.453862	0.177776	0.156505	12.4529	3.63841	up
ko00480	Glutathione metabolism	0.00094278	MSTRG.14291	HHC014792	K18592	EC:2.3.2.2;EC:3.4.19.13	gamma-glutamyl transpeptidase [Allium sativum];gamma-glutamyltranspeptidase 3-like isoform X1 [Asparagus officinalis]	11.9336	13.9216	7.97381	3.36161	2.70338	3.22449	3.13693	1.64935	up
ko00480	Glutathione metabolism	0.00094278	MSTRG.15551	HHC016397	K00799	EC:2.5.1.18	glutathione S-transferase [Dracaena cambodiana]	7.71135	15.0219	14.2104	44.1903	48.2997	46.6609	0.427198	-1.22702	down
ko00480	Glutathione metabolism	0.00094278	MSTRG.15951	HHC016926	K18592	EC:2.3.2.2;EC:3.4.19.13	hypothetical protein GW17_00024033 [Ensete ventricosum]	0.719399	1.02684	0.531168	4.25082	6.36626	5.41374	0.27709	-1.85158	down
ko00480	Glutathione metabolism	0.00094278	MSTRG.17390	HHC018897	K22596	EC:4.3.2.9	gamma-glutamylcyclotransferase 2-2-like [Asparagus officinalis]	212.897	1369.11	2475.72	350.065	360.112	342.05	3.13873	1.65018	up
ko00480	Glutathione metabolism	0.00094278	MSTRG.18719	HHC020985	K00799	EC:2.5.1.18	glutathione S-transferase U17-like [Phoenix dactylifera];PREDICTED: probable glutathione S-transferase [Nicotiana attenuata];PREDICTED: glutathione S-transferase U17-like [Nicotiana attenuata]	13.2984	1.8917	0.828231	0.152545	0.340813	0.159084	16.1742	4.01563	up
ko00480	Glutathione metabolism	0.00094278	MSTRG.20401	HHC023292	K22596	EC:4.3.2.9	gamma-glutamylcyclotransferase 2-2-like [Asparagus officinalis]	9.46777	60.5337	78.7894	3.0789	2.6488	3.52067	12.3082	3.62154	up
ko00480	Glutathione metabolism	0.00094278	MSTRG.25269	HHC030682	K01255	EC:3.4.11.1	PREDICTED: cyclin-U1-1 [Elaeis guineensis]	38.2305	26.5429	18.4008	10.8171	11.2313	10.5425	2.15836	1.10994	up
ko00480	Glutathione metabolism	0.00094278	MSTRG.27314	HHC034183	K00799	EC:2.5.1.18	glutathione S-transferase 3-like [Asparagus officinalis]	137.231	94.9308	65.9169	33.8031	30.2372	29.8722	2.76065	1.46501	up
ko00480	Glutathione metabolism	0.00094278	MSTRG.2779	HHC003861	K01919	EC:6.3.2.2	glutamate--cysteine ligase, chloroplastic [Asparagus officinalis]	49.0956	53.5162	20.9526	7.50503	4.95368	5.52409	6.25464	2.64493	up
ko00480	Glutathione metabolism	0.00094278	MSTRG.30230	HHC038485	K22596	EC:4.3.2.9	gamma-glutamylcyclotransferase 2-3 [Asparagus officinalis]	21.3141	22.6245	28.3572	9.08325	10.1415	9.72997	2.04764	1.03396	up
ko00480	Glutathione metabolism	0.00094278	MSTRG.32789	HHC047619	K18592	EC:2.3.2.2;EC:3.4.19.13	gamma-glutamyl transpeptidase [Allium sativum]	27.0159	21.8248	10.9167	7.82066	6.55092	5.12675	2.89348	1.5328	up
ko00480	Glutathione metabolism	0.00094278	MSTRG.35344	HHC051289	K00799	EC:2.5.1.18	PREDICTED: glutathione transferase GST 23-like [Elaeis guineensis]	205.505	63.2661	55.4621	28.3771	32.6446	35.9967	2.5685	1.36093	up
ko00480	Glutathione metabolism	0.00094278	MSTRG.36278	HHC049924	K00799	EC:2.5.1.18	PREDICTED: probable glutathione S-transferase GSTF1 [Musa acuminata subsp. malaccensis]	21.4689	11.8398	11.1667	4.52633	4.7996	5.44493	2.39161	1.25798	up
ko00480	Glutathione metabolism	0.00094278	MSTRG.4793	HHC041497	K00799	EC:2.5.1.18	glutathione S-transferase 3-like [Ananas comosus];Glutathione S-transferase 3, partial [Ananas comosus];PREDICTED: glutathione S-transferase 3 [Oryza brachyantha]	1461.75	427.283	409.107	162.861	214.114	226.434	2.79311	1.48187	up
ko00480	Glutathione metabolism	0.00094278	MSTRG.8826	HHC006401	K21888	EC:1.8.5.1;EC:2.5.1.18	glutathione S-transferase DHAR2-like [Asparagus officinalis]	548.086	1199.05	396.466	230.622	209.069	216.652	2.78847	1.47947	up
ko00944	Flavone and flavonol biosynthesis	0.00240227	MSTRG.1033	HHC001277	K14595;K22771	EC:2.4.1.263;EC:2.4.1.-	scopoletin glucosyltransferase-like [Asparagus officinalis]	7.52523	227.716	19.9133	9.62393	14.3808	11.0198	5.21207	2.38186	up
ko00944	Flavone and flavonol biosynthesis	0.00240227	MSTRG.12085	HHC011468	K22771	EC:2.4.1.-	UDP-glycosyltransferase 73C6-like [Asparagus officinalis]	7.23721	3.77316	8.72047	1.42184	1.96704	1.72547	2.86427	1.51817	up
ko00944	Flavone and flavonol biosynthesis	0.00240227	MSTRG.28534	HHC035961	K13264	EC:2.3.1.115	PREDICTED: malonyl-coenzyme A:anthocyanin 3-O-glucoside-6''-O-malonyltransferase-like [Elaeis guineensis]	50.4243	26.5006	26.6444	26.7977	6.52784	5.62096	5.36543	2.42369	up
ko00944	Flavone and flavonol biosynthesis	0.00240227	MSTRG.33891	HHC051549	K13264	EC:2.3.1.115	PREDICTED: malonyl-coenzyme A:anthocyanin 3-O-glucoside-6''-O-malonyltransferase-like [Elaeis guineensis]	250.136	95.646	110.696	62.4912	60.2044	57.0884	2.21228	1.14553	up
ko00944	Flavone and flavonol biosynthesis	0.00240227	MSTRG.5858	HHC043059	K22771	EC:2.4.1.-	UDP-glycosyltransferase 73D1-like [Asparagus officinalis]	1.89398	0.924209	0.29092	0.103562	0.162179	0.113326	5.83051	2.54362	up
ko00944	Flavone and flavonol biosynthesis	0.00240227	MSTRG.8205	HHC046621	K22771	EC:2.4.1.-	UDP-glycosyltransferase 73C5-like [Asparagus officinalis]	15.1638	4.70803	5.17265	1.84765	2.32396	1.55348	3.46777	1.79401	up
ko00941	Flavonoid biosynthesis	0.00349644	MSTRG.12550	HHC012078	K00660	EC:2.3.1.74	chalcone synthase [Narcissus tazetta subsp. chinensis]	54.4182	532.887	63.5807	9.1044	11.7637	8.69136	16.1327	4.01192	up
ko00941	Flavonoid biosynthesis	0.00349644	MSTRG.15761	HHC016669	K05278;K05933	EC:1.14.20.6;EC:1.14.17.4	S-norcoclaurine synthase 1-like [Phoenix dactylifera]	15.4316	7.68943	5.3049	3.1863	2.6684	2.25641	3.20949	1.68234	up
ko00941	Flavonoid biosynthesis	0.00349644	MSTRG.16548	HHC017747	K05278;K05282	EC:1.14.20.6;EC:1.14.11.12	uncharacterized protein A4U43_C03F22860 [Asparagus officinalis]	21.353	107.785	229.823	27.6394	30.4086	30.7811	3.15904	1.65949	up
ko00941	Flavonoid biosynthesis	0.00349644	MSTRG.18209	HHC020323	K00475	EC:1.14.11.9	protein DOWNY MILDEW RESISTANCE 6 [Asparagus officinalis]	20.6521	5.08916	0.193112	0.266433	0.645218	0.813332	8.98179	3.167	up
ko00941	Flavonoid biosynthesis	0.00349644	MSTRG.191	HHC000220	K05277	EC:1.14.20.4	anthocyanidin synthase [Iris x hollandica]	1.52489	25.1795	2.70465	1.42909	0.529728	0.852745	11.1532	3.47939	up
ko00941	Flavonoid biosynthesis	0.00349644	MSTRG.23418	HHC028129	K13082	EC:1.1.1.219;EC:1.1.1.234	tetraketide alpha-pyrone reductase 1-like isoform X1 [Asparagus officinalis]	0.0984664	123.397	4.21855	1.91488	1.02371	1.77681	23.1437	4.53255	up
ko00941	Flavonoid biosynthesis	0.00349644	MSTRG.25317	HHC030768	K00660	EC:2.3.1.74	chalcone synthase [Narcissus tazetta subsp. chinensis]	22.418	246.442	65.814	28.2235	26.7626	33.3493	3.01852	1.59384	up
ko00941	Flavonoid biosynthesis	0.00349644	MSTRG.25771	HHC031596	K13082	EC:1.1.1.219;EC:1.1.1.234	dihydroflavonol 4-reductase [Muscari armeniacum]	61.8622	300.594	20.3594	18.914	15.2993	16.9587	6.22683	2.6385	up
ko00941	Flavonoid biosynthesis	0.00349644	MSTRG.31629	HHC040422	K01859	EC:5.5.1.6	vacuolar-sorting receptor 6-like [Asparagus officinalis]	75.9995	12.0077	1.42501	3.65444	3.29826	3.42719	6.92046	2.79087	up
ko00941	Flavonoid biosynthesis	0.00349644	MSTRG.33550	HHC053582	K00588	EC:2.1.1.104	PREDICTED: caffeoyl-CoA O-methyltransferase [Nelumbo nucifera];caffeoyl-CoA O-methyltransferase [Amborella trichopoda]	40.8055	41.279	23.6435	17.0126	13.2273	13.0112	2.33894	1.22585	up
ko00941	Flavonoid biosynthesis	0.00349644	MSTRG.3391	HHC004974	K00660	EC:2.3.1.74	chalcone synthase [Narcissus tazetta subsp. chinensis]	2.68767	56.9478	16.1817	7.44684	7.09011	5.17909	3.39321	1.76265	up
ko00941	Flavonoid biosynthesis	0.00349644	MSTRG.8092	HHC046446	K05278;K06892	EC:1.14.20.6;EC:1.14.11.-	S-norcoclaurine synthase 1-like [Asparagus officinalis]	36.2176	16.5307	2.36395	2.29157	1.45883	1.64581	9.24484	3.20865	up
ko00942	Anthocyanin biosynthesis	0.00489217	MSTRG.24692	HHC029823	K12938	EC:2.4.1.-	PREDICTED: UDP-glycosyltransferase 88A1-like [Elaeis guineensis];PREDICTED: UDP-glycosyltransferase 88B1-like [Musa acuminata subsp. malaccensis]	29.2198	10.0232	6.79896	4.68801	5.51883	4.43558	2.54811	1.34943	up
ko00942	Anthocyanin biosynthesis	0.00489217	MSTRG.30327	HHC038641	K12938	EC:2.4.1.-	UDP-glycosyltransferase 88F3-like [Phoenix dactylifera]	316.605	246.481	76.2859	31.4636	32.603	30.7942	5.29073	2.40347	up
ko00942	Anthocyanin biosynthesis	0.00489217	MSTRG.34135	HHC051453	K12938	EC:2.4.1.-	PREDICTED: UDP-glycosyltransferase 88A1-like [Elaeis guineensis]	89.5085	30.5032	21.2213	12.5382	14.6435	11.1859	2.97668	1.5737	up
ko00942	Anthocyanin biosynthesis	0.00489217	MSTRG.4303	HHC040611	K12930	EC:2.4.1.115	UDP glucose-flavonoid 3-O-glucosyltransferase 1 [Narcissus tazetta subsp. chinensis]	14.5585	81.3115	9.62037	10.2287	6.91118	8.66138	3.71548	1.89355	up
ko00270	Cysteine and methionine metabolism	0.00525727	MSTRG.11782	HHC011078	K01739	EC:2.5.1.48	uncharacterized protein A4U43_C03F17520 [Asparagus officinalis]	14.3254	6.34422	9.35239	2.79686	2.89253	2.22422	3.207	1.68123	up
ko00270	Cysteine and methionine metabolism	0.00525727	MSTRG.15761	HHC016669	K05278;K05933	EC:1.14.20.6;EC:1.14.17.4	S-norcoclaurine synthase 1-like [Phoenix dactylifera]	15.4316	7.68943	5.3049	3.1863	2.6684	2.25641	3.20949	1.68234	up
ko00270	Cysteine and methionine metabolism	0.00525727	MSTRG.18175	HHC020264	K20772	EC:4.4.1.14	1-aminocyclopropane-1-carboxylic acid synthase [Narcissus tazetta subsp. chinensis]	0.692556	0.386026	0.164861	0.189302	0.118488	0.100995	3.26391	1.7066	up
ko00270	Cysteine and methionine metabolism	0.00525727	MSTRG.18274	HHC020411	K00640	EC:2.3.1.30	PREDICTED: probable serine acetyltransferase 2 [Elaeis guineensis];probable serine acetyltransferase 2 isoform X1 [Asparagus officinalis]	2.00713	2.14468	2.61632	0.640896	0.0676856	0.1682	15.7047	3.97313	up
ko00270	Cysteine and methionine metabolism	0.00525727	MSTRG.21069	HHC024353	K01761	EC:4.4.1.11	PREDICTED: methionine gamma-lyase-like [Musa acuminata subsp. malaccensis]	119.871	90.3865	161.568	48.9978	46.2733	43.9861	2.33119	1.22107	up
ko00270	Cysteine and methionine metabolism	0.00525727	MSTRG.23681	HHC028484	K00815	EC:2.6.1.5	nicotianamine aminotransferase A-like isoform X1 [Asparagus officinalis]	19.9789	9.28176	1.74716	2.90574	2.73313	2.03488	3.55637	1.83041	up
ko00270	Cysteine and methionine metabolism	0.00525727	MSTRG.23986	HHC028878	K01738	EC:2.5.1.47	cysteine synthase [Phoenix dactylifera]	354.41	256.341	138.818	32.9132	30.2249	37.8544	5.74685	2.52277	up
ko00270	Cysteine and methionine metabolism	0.00525727	MSTRG.25442	HHC030990	K00558	EC:2.1.1.37	PREDICTED: uncharacterized protein LOC105041884 [Elaeis guineensis]	16.5402	6.88258	5.25703	2.04166	1.38206	2.1118	4.3965	2.13636	up
ko00270	Cysteine and methionine metabolism	0.00525727	MSTRG.2697	HHC003720	K00827	EC:2.6.1.44;EC:2.6.1.40	alanine--glyoxylate aminotransferase 2 homolog 3, mitochondrial-like [Asparagus officinalis]	0.274572	1.28901	1.8126	0.0001	0.0001	0.0001	8440.72	13.0432	up
ko00270	Cysteine and methionine metabolism	0.00525727	MSTRG.2779	HHC003861	K01919	EC:6.3.2.2	glutamate--cysteine ligase, chloroplastic [Asparagus officinalis]	49.0956	53.5162	20.9526	7.50503	4.95368	5.52409	6.25464	2.64493	up
ko00270	Cysteine and methionine metabolism	0.00525727	MSTRG.32972	HHC047350	K00640	EC:2.3.1.30	PREDICTED: serine acetyltransferase 1, chloroplastic [Elaeis guineensis]	25.0356	13.0092	31.3148	7.18698	6.30061	5.09348	3.35905	1.74805	up
ko00270	Cysteine and methionine metabolism	0.00525727	MSTRG.33387	HHC048165	K00640	EC:2.3.1.30	probable serine acetyltransferase 2 isoform X1 [Asparagus officinalis]	3.61288	6.08166	3.47292	2.04839	1.59883	1.67633	2.32292	1.21594	up
ko00270	Cysteine and methionine metabolism	0.00525727	MSTRG.36021	HHC053662	K00826	EC:2.6.1.42	branched-chain-amino-acid aminotransferase 5, chloroplastic-like isoform X2 [Asparagus officinalis]	22.3662	3.95389	0.0001	0.0001	0.0001	0.0001	65800.6	16.0058	up
ko00270	Cysteine and methionine metabolism	0.00525727	MSTRG.36160	HHC049451	K01738	EC:2.5.1.47	cysteine synthase-like [Asparagus officinalis]	189.018	195.77	99.13	51.8892	55.1899	46.3818	2.63758	1.39922	up
ko00270	Cysteine and methionine metabolism	0.00525727	MSTRG.8437	HHC046989	K00815	EC:2.6.1.5	uncharacterized protein LOC110102404 isoform X1 [Dendrobium catenatum]	29.4044	7.40646	17.0067	3.35214	2.23206	2.49231	6.05051	2.59706	up
ko00270	Cysteine and methionine metabolism	0.00525727	MSTRG.9023	HHC006653	K00789	EC:2.5.1.6	S-adenosylmethionine synthetase [Lycoris radiata]	628.903	1313.67	2150.9	370.639	401.385	381.688	2.85038	1.51116	up
ko00908	Zeatin biosynthesis	0.00820922	MSTRG.12920	HHC012791	K00279	EC:1.5.99.12	PREDICTED: cytokinin dehydrogenase 11-like [Elaeis guineensis]	2.39362	1.5473	1.47676	0.628037	0.627647	0.42992	2.85832	1.51517	up
ko00908	Zeatin biosynthesis	0.00820922	MSTRG.16494	HHC017659	K13495	EC:2.4.1.215	PREDICTED: putative cis-zeatin O-glucosyltransferase [Elaeis guineensis]	14.3605	4.03883	4.35934	1.18455	1.93814	2.07065	2.98635	1.57838	up
ko00908	Zeatin biosynthesis	0.00820922	MSTRG.27253	HHC034083	K10760	EC:2.5.1.27;EC:2.5.1.112	adenylate isopentenyltransferase 5, chloroplastic-like [Asparagus officinalis]	23.8565	19.4367	3.04009	2.83447	3.64728	3.2716	3.55316	1.8291	up
ko00908	Zeatin biosynthesis	0.00820922	MSTRG.4713	HHC041356	K10760	EC:2.5.1.27;EC:2.5.1.112	adenylate isopentenyltransferase 5, chloroplastic-like [Asparagus officinalis]	4.68511	7.14849	0.615646	0.758649	0.341587	0.604722	6.97864	2.80295	up
ko00908	Zeatin biosynthesis	0.00820922	MSTRG.6846	HHC044415	K10760	EC:2.5.1.27;EC:2.5.1.112	adenylate isopentenyltransferase-like [Dendrobium catenatum]	25.3565	8.41281	0.474844	0.870838	0.962067	0.439881	12.5236	3.64658	up
ko00950	Isoquinoline alkaloid biosynthesis	0.0109784	gene-HHC017860	HHC017860	K01593	EC:4.1.1.28;EC:4.1.1.105	tyrosine/DOPA decarboxylase 1-like [Phoenix dactylifera]	1.3187	1.14596	0.135055	0.125317	0.0001	0.0562091	24.197	4.59676	up
ko00950	Isoquinoline alkaloid biosynthesis	0.0109784	MSTRG.13955	HHC014322	K21311	EC:2.1.1.336	norbelladine 4'-O-methyltransferase-like [Phoenix dactylifera]	48.0349	35.076	7.71395	8.8691	8.85388	8.59113	2.85738	1.51469	up
ko00950	Isoquinoline alkaloid biosynthesis	0.0109784	MSTRG.13956	HHC014323	K21311	EC:2.1.1.336	flavonoid 3',5'-methyltransferase-like [Asparagus officinalis];caffeoyl-CoA O-methyltransferase-like isoform X1 [Asparagus officinalis]	7.77406	4.36801	1.20765	0.626458	0.652656	1.07823	4.03729	2.01339	up
ko00950	Isoquinoline alkaloid biosynthesis	0.0109784	MSTRG.23189	HHC027814	K00276	EC:1.4.3.21	PREDICTED: primary amine oxidase-like [Musa acuminata subsp. malaccensis]	51.8155	31.6702	6.06833	7.74501	7.53123	5.41035	3.75916	1.91041	up
ko00950	Isoquinoline alkaloid biosynthesis	0.0109784	MSTRG.23681	HHC028484	K00815	EC:2.6.1.5	nicotianamine aminotransferase A-like isoform X1 [Asparagus officinalis]	19.9789	9.28176	1.74716	2.90574	2.73313	2.03488	3.55637	1.83041	up
ko00950	Isoquinoline alkaloid biosynthesis	0.0109784	MSTRG.28172	HHC035470	K00276	EC:1.4.3.21	primary amine oxidase-like [Ananas comosus]	58.0545	28.481	15.9121	6.45029	7.01018	5.7235	4.27598	2.09625	up
ko00950	Isoquinoline alkaloid biosynthesis	0.0109784	MSTRG.8437	HHC046989	K00815	EC:2.6.1.5	uncharacterized protein LOC110102404 isoform X1 [Dendrobium catenatum]	29.4044	7.40646	17.0067	3.35214	2.23206	2.49231	6.05051	2.59706	up
ko00196	Photosynthesis - antenna proteins	0.0129659	MSTRG.23598	HHC028374	K08912	NA	chloroplast chlorophyll a/b-binding protein [Ophiopogon japonicus]	10550.3	3889.69	5211.07	1782.51	1904.15	1882.79	2.82994	1.50077	up
ko00196	Photosynthesis - antenna proteins	0.0129659	MSTRG.28404	HHC035771	K08907	NA	chlorophyll a-b binding protein 6, chloroplastic [Phoenix dactylifera]	641.774	641.82	1063.19	346.404	351.807	317.006	2.01341	1.00964	up
ko00196	Photosynthesis - antenna proteins	0.0129659	MSTRG.29707	HHC037643	K08915	NA	putative chlorophyll A-B binding protein [Medicago truncatula]	12403.1	15664.8	17937.2	5731.28	5919.77	5975.25	2.17471	1.12082	up
ko00196	Photosynthesis - antenna proteins	0.0129659	MSTRG.32976	HHC047358	K08913	NA	chlorophyll a-b binding protein 5, chloroplastic [Asparagus officinalis]	12692.7	8268.39	13294.3	4669.56	4793.12	4780.21	2.03299	1.0236	up
ko00196	Photosynthesis - antenna proteins	0.0129659	MSTRG.7966	HHC046204	K08912	NA	PREDICTED: chlorophyll a-b binding protein 40, chloroplastic-like [Nicotiana attenuata];Chlorophyll A-B binding protein [Macleaya cordata]	15.9454	35.5932	60.5686	16.4616	6.6786	17.7968	2.62649	1.39314	up
ko04712	Circadian rhythm - plant	0.0152495	MSTRG.11023	HHC010033	K16223	NA	protein FLOWERING LOCUS T-like [Asparagus officinalis]	10.9083	23.1052	0.671078	0.845596	1.30697	1.77636	5.76168	2.52649	up
ko04712	Circadian rhythm - plant	0.0152495	MSTRG.12550	HHC012078	K00660	EC:2.3.1.74	chalcone synthase [Narcissus tazetta subsp. chinensis]	54.4182	532.887	63.5807	9.1044	11.7637	8.69136	16.1327	4.01192	up
ko04712	Circadian rhythm - plant	0.0152495	MSTRG.1730	HHC002254	K12135	NA	zinc finger protein CONSTANS-LIKE 2 isoform X1 [Asparagus officinalis]	77.427	55.9361	42.3841	20.9805	24.8669	21.7813	2.10863	1.07631	up
ko04712	Circadian rhythm - plant	0.0152495	MSTRG.2283	HHC003057	K12126;K16189	NA	unnamed protein product [Brassica oleracea];PREDICTED: transcription factor UNE10-like isoform X4 [Elaeis guineensis];putative transcription factor bHLH family [Rosa chinensis]	18.4328	13.1253	13.2117	8.00727	5.30082	7.75009	2.02197	1.01576	up
ko04712	Circadian rhythm - plant	0.0152495	MSTRG.24824	HHC030027	K12135	NA	zinc finger protein CONSTANS-LIKE 2 isoform X1 [Asparagus officinalis]	561.751	417.913	280.626	88.6899	78.5195	93.4561	3.92201	1.97159	up
ko04712	Circadian rhythm - plant	0.0152495	MSTRG.25317	HHC030768	K00660	EC:2.3.1.74	chalcone synthase [Narcissus tazetta subsp. chinensis]	22.418	246.442	65.814	28.2235	26.7626	33.3493	3.01852	1.59384	up
ko04712	Circadian rhythm - plant	0.0152495	MSTRG.26780	HHC033202	K12126	NA	transcription factor bHLH130-like [Dendrobium catenatum]	28.1666	54.2121	7.39517	8.34814	9.2068	6.71592	3.0812	1.62349	up
ko04712	Circadian rhythm - plant	0.0152495	MSTRG.27570	HHC034570	K12130	NA	zinc finger protein CONSTANS-LIKE 13-like [Asparagus officinalis]	315.957	130.897	44.3078	45.2667	46.5712	51.3788	2.73828	1.45327	up
ko04712	Circadian rhythm - plant	0.0152495	MSTRG.28606	HHC036061	K16221	NA	transcription factor TCP7-like [Phoenix dactylifera]	2.37399	2.20955	3.46763	1.95887	1.06001	1.16014	2.25436	1.17272	up
ko04712	Circadian rhythm - plant	0.0152495	MSTRG.32082	HHC048392	K12126	NA	transcription factor PIF3-like [Asparagus officinalis]	1.40741	1.64664	1.69441	3.46548	5.14204	4.75095	0.415139	-1.26833	down
ko04712	Circadian rhythm - plant	0.0152495	MSTRG.32739	HHC048484	K03115	NA	putative casein kinase II subunit beta-4 isoform X1 [Asparagus officinalis]	2.38144	3.21275	0.491827	3.09889	0.467801	0.922093	3.30418	1.72429	up
ko04712	Circadian rhythm - plant	0.0152495	MSTRG.3391	HHC004974	K00660	EC:2.3.1.74	chalcone synthase [Narcissus tazetta subsp. chinensis]	2.68767	56.9478	16.1817	7.44684	7.09011	5.17909	3.39321	1.76265	up
ko04712	Circadian rhythm - plant	0.0152495	MSTRG.6216	HHC043548	K12133	NA	protein REVEILLE 2-like [Asparagus officinalis]	52.6116	37.2966	40.8482	26.8303	1.39595	0.593502	39.6055	5.30763	up
ko00333	Prodigiosin biosyntheses	0.0187251	MSTRG.14939	HHC015671	K00059	EC:1.1.1.100	uncharacterized protein LOC103720253 [Phoenix dactylifera]	864.773	217.058	87.1327	62.8715	66.7161	70.5074	4.48843	2.16621	up
ko00333	Prodigiosin biosyntheses	0.0187251	MSTRG.16933	HHC018260	K00059	EC:1.1.1.100	3-oxoacyl-[acyl-carrier-protein] reductase 4-like [Asparagus officinalis]	12.1033	6.42707	8.7799	9.40775	3.61812	4.20555	2.3466	1.23057	up
ko00333	Prodigiosin biosyntheses	0.0187251	MSTRG.19430	HHC021939	K00059	EC:1.1.1.100	short-chain type dehydrogenase/reductase-like [Asparagus officinalis]	9.33348	3.19658	8.47552	0.877816	1.26888	1.17598	4.47537	2.16201	up
ko00333	Prodigiosin biosyntheses	0.0187251	MSTRG.33016	HHC047417	K00059	EC:1.1.1.100	uncharacterized protein LOC103720253 [Phoenix dactylifera]	328.118	94.4805	19.8941	15.4426	10.2211	8.16559	12.4529	3.63841	up
ko00380	Tryptophan metabolism	0.0189502	gene-HHC017860	HHC017860	K01593	EC:4.1.1.28;EC:4.1.1.105	tyrosine/DOPA decarboxylase 1-like [Phoenix dactylifera]	1.3187	1.14596	0.135055	0.125317	0.0001	0.0562091	24.197	4.59676	up
ko00380	Tryptophan metabolism	0.0189502	gene-HHC044026	HHC044026	K11816	EC:1.14.13.168	indole-3-pyruvate monooxygenase YUCCA2-like isoform X1 [Asparagus officinalis]	4.08378	1.8956	0.804726	1.26915	0.508693	0.400169	4.43041	2.14744	up
ko00380	Tryptophan metabolism	0.0189502	MSTRG.12877	HHC012717	K00816	EC:2.6.1.7;EC:4.4.1.13	PREDICTED: uncharacterized protein LOC105058225 [Elaeis guineensis];Methionine aminotransferase [Ananas comosus]	120.807	190.845	243.401	82.4547	78.3759	74.0699	2.09093	1.06415	up
ko00380	Tryptophan metabolism	0.0189502	MSTRG.15528	HHC016376	K03781	EC:1.11.1.6	catalase isozyme 1-like [Asparagus officinalis];catalase [Hypericum perforatum];catalase-1 [Ananas comosus]	822.044	259.211	282.024	153.191	159.006	154.935	2.41522	1.27215	up
ko00380	Tryptophan metabolism	0.0189502	MSTRG.1763	HHC002296	K00128	EC:1.2.1.3	LOW QUALITY PROTEIN: aldehyde dehydrogenase family 2 member B7, mitochondrial-like [Asparagus officinalis]	6.2678	3.97913	21.1137	1.83199	2.49058	2.38107	3.40671	1.76838	up
ko00380	Tryptophan metabolism	0.0189502	MSTRG.29019	HHC036625	K11816	EC:1.14.13.168	indole-3-pyruvate monooxygenase YUCCA2-like isoform X1 [Asparagus officinalis]	21.7711	12.9845	1.72356	3.02979	2.7773	3.63515	3.08065	1.62323	up
ko00380	Tryptophan metabolism	0.0189502	MSTRG.29960	HHC038045	K00128	EC:1.2.1.3	aldehyde dehydrogenase family 3 member F1-like [Asparagus officinalis]	11.5084	25.0615	15.9162	16.8047	48.3212	50.8613	0.34931	-1.51742	down
ko00380	Tryptophan metabolism	0.0189502	MSTRG.30338	HHC038655	K11816	EC:1.14.13.168	indole-3-pyruvate monooxygenase YUCCA2-like [Phoenix dactylifera]	7.33687	2.21283	0.821489	0.176019	0.169263	0.236023	13.0121	3.70178	up
ko00380	Tryptophan metabolism	0.0189502	MSTRG.6090	HHC043385	K03781	EC:1.11.1.6	PREDICTED: catalase isozyme A [Musa acuminata subsp. malaccensis]	60.3265	30.1465	9.92071	7.24362	7.74981	5.59395	4.03325	2.01194	up
ko04016	MAPK signaling pathway - plant	0.0249879	gene-HHC028271	HHC028271	K14514	NA	phosphate transporter PHO1-3 [Asparagus officinalis]	2.36769	5.18035	0.566625	0.659597	0.693742	0.533915	3.57358	1.83737	up
ko04016	MAPK signaling pathway - plant	0.0249879	MSTRG.1001	HHC001230	K14514	NA	phosphate transporter PHO1-3 [Asparagus officinalis]	58.4779	38.411	0.456407	1.02657	1.13103	0.736713	26.3344	4.71888	up
ko04016	MAPK signaling pathway - plant	0.0249879	MSTRG.10406	HHC009078	K20725	NA	PREDICTED: uncharacterized protein LOC103995088 [Musa acuminata subsp. malaccensis]	15.0735	8.25343	5.00915	2.76097	3.00067	2.54892	2.80174	1.48632	up
ko04016	MAPK signaling pathway - plant	0.0249879	MSTRG.10741	HHC009610	K13425	NA	transcription factor WRKYY2 [Narcissus hybrid cultivar]	25.5359	39.6923	15.7046	13.9286	11.5611	11.1931	2.08448	1.05969	up
ko04016	MAPK signaling pathway - plant	0.0249879	MSTRG.10742	HHC009612	K02183	NA	probable calcium-binding protein CML29 [Phoenix dactylifera]	986.082	726.029	120.407	152.896	150.619	150.64	3.29519	1.72036	up
ko04016	MAPK signaling pathway - plant	0.0249879	MSTRG.10840	HHC009755	K13413	EC:2.7.12.2	mitogen-activated protein kinase kinase 5-like [Phoenix dactylifera]	61.329	23.6953	25.4444	11.6879	16.0973	11.2886	2.23029	1.15723	up
ko04016	MAPK signaling pathway - plant	0.0249879	MSTRG.15528	HHC016376	K03781	EC:1.11.1.6	catalase isozyme 1-like [Asparagus officinalis];catalase [Hypericum perforatum];catalase-1 [Ananas comosus]	822.044	259.211	282.024	153.191	159.006	154.935	2.41522	1.27215	up
ko04016	MAPK signaling pathway - plant	0.0249879	MSTRG.15747	HHC016745	K00940	EC:2.7.4.6	nucleoside diphosphate kinase, partial [Hyacinthus orientalis]	22.4573	11.2433	9.14017	4.40741	4.22295	4.70115	2.64722	1.40448	up
ko04016	MAPK signaling pathway - plant	0.0249879	MSTRG.18175	HHC020264	K20772	EC:4.4.1.14	1-aminocyclopropane-1-carboxylic acid synthase [Narcissus tazetta subsp. chinensis]	0.692556	0.386026	0.164861	0.189302	0.118488	0.100995	3.26391	1.7066	up
ko04016	MAPK signaling pathway - plant	0.0249879	MSTRG.1820	HHC002367	K13425	NA	transcription factor WRKYY2 [Narcissus hybrid cultivar]	6.9781	6.66321	1.29946	1.93954	1.43166	1.9486	2.49689	1.32013	up
ko04016	MAPK signaling pathway - plant	0.0249879	MSTRG.19444	HHC021953	K20553	EC:3.1.13.-	FRIGIDA-like protein 4a [Asparagus officinalis]	76.8837	34.0695	47.4382	24.8321	21.2252	23.2617	2.0593	1.04215	up
ko04016	MAPK signaling pathway - plant	0.0249879	MSTRG.2708	HHC003738	K13424	NA	WRKY transcription factor WRKY24-like [Phoenix dactylifera];PREDICTED: WRKY transcription factor WRKY24 [Elaeis guineensis]	122.093	49.0945	39.8822	16.9968	21.0984	22.0926	2.64021	1.40065	up
ko04016	MAPK signaling pathway - plant	0.0249879	MSTRG.30064	HHC038213	K20604	EC:2.7.12.2	mitogen-activated protein kinase kinase 9-like [Phoenix dactylifera]	115.71	48.6225	62.1685	35.4834	28.7218	23.6235	2.50246	1.32335	up
ko04016	MAPK signaling pathway - plant	0.0249879	MSTRG.30293	HHC038579	K14512	EC:2.7.11.24	LOW QUALITY PROTEIN: mitogen-activated protein kinase 1-like [Asparagus officinalis]	1.32711	1.19387	0.90092	0.624535	0.356259	0.199463	3.6407	1.86422	up
ko04016	MAPK signaling pathway - plant	0.0249879	MSTRG.30900	HHC039445	K13422	NA	transcription factor EAT1-like isoform X1 [Asparagus officinalis]	9.73631	13.0279	10.3687	16.0615	31.5621	26.2583	0.425408	-1.23308	down
ko04016	MAPK signaling pathway - plant	0.0249879	MSTRG.30984	HHC039560	K02183	NA	putative calcium-binding protein [Ananas comosus]	1.40948	2.15779	36.0714	2.03777	0.678592	1.2214	10.9675	3.45516	up
ko04016	MAPK signaling pathway - plant	0.0249879	MSTRG.32917	HHC050085	K13425	NA	transcription factor WRKYJ2, partial [Narcissus hybrid cultivar]	14.8117	12.0288	22.5768	6.08494	2.50258	4.58656	3.91459	1.96886	up
ko04016	MAPK signaling pathway - plant	0.0249879	MSTRG.333	HHC000377	K13424	NA	probable WRKY transcription factor 72 isoform X1 [Phoenix dactylifera]	8.62914	2.6092	0.639535	0.977402	0.846301	0.669915	4.23926	2.08381	up
ko04016	MAPK signaling pathway - plant	0.0249879	MSTRG.464	HHC000528	K20728	NA	PREDICTED: acid phosphatase 1 [Vitis vinifera]	8.80449	54.222	2.77111	0.0001	0.0001	0.0001	164494	17.3277	up
ko04016	MAPK signaling pathway - plant	0.0249879	MSTRG.4944	HHC041738	K13425	NA	DNA-binding WRKY [Cinnamomum micranthum f. kanehirae]	2.88999	0.29917	1.97809	1.79876	0.0001	0.226848	15.3471	3.9399	up
ko04016	MAPK signaling pathway - plant	0.0249879	MSTRG.6090	HHC043385	K03781	EC:1.11.1.6	PREDICTED: catalase isozyme A [Musa acuminata subsp. malaccensis]	60.3265	30.1465	9.92071	7.24362	7.74981	5.59395	4.03325	2.01194	up
ko04016	MAPK signaling pathway - plant	0.0249879	MSTRG.7231	HHC044822	K14516	NA	PREDICTED: ethylene-responsive transcription factor 1B-like [Eucalyptus grandis]	3.17334	5.65654	5.429	0.262647	0.196865	0.0001	36.8632	5.20411	up
ko04016	MAPK signaling pathway - plant	0.0249879	MSTRG.8236	HHC046672	K14515	NA	hypothetical protein BHE74_00046053, partial [Ensete ventricosum]	1.2004	0.110458	2.77289	0.199321	0.212606	0.0752685	7.43912	2.89513	up
ko04016	MAPK signaling pathway - plant	0.0249879	MSTRG.9977	HHC008406	K13424	NA	WRKY transcription factor WRKY24-like [Phoenix dactylifera]	142.67	49.0503	55.4499	30.1993	26.7182	29.7004	2.45814	1.29757	up
ko00340	Histidine metabolism	0.0268541	MSTRG.15319	HHC016101	K01590	EC:4.1.1.22	serine decarboxylase 1 [Asparagus officinalis]	7.02551	2.8012	1.81329	1.8929	1.2884	0.886365	3.11135	1.63754	up
ko00340	Histidine metabolism	0.0268541	MSTRG.1763	HHC002296	K00128	EC:1.2.1.3	LOW QUALITY PROTEIN: aldehyde dehydrogenase family 2 member B7, mitochondrial-like [Asparagus officinalis]	6.2678	3.97913	21.1137	1.83199	2.49058	2.38107	3.40671	1.76838	up
ko00340	Histidine metabolism	0.0268541	MSTRG.21615	HHC025219	K00765	EC:2.4.2.17	ATP phosphoribosyltransferase 2, chloroplastic-like [Dendrobium catenatum]	22.4716	23.476	22.734	31.9681	13.8463	9.33472	2.17095	1.11833	up
ko00340	Histidine metabolism	0.0268541	MSTRG.29960	HHC038045	K00128	EC:1.2.1.3	aldehyde dehydrogenase family 3 member F1-like [Asparagus officinalis]	11.5084	25.0615	15.9162	16.8047	48.3212	50.8613	0.34931	-1.51742	down
ko00523	Polyketide sugar unit biosynthesis	0.029372	MSTRG.18856	HHC021157	K12451	EC:5.1.3.-;EC:1.1.1.-	UER1 protein [Ornithogalum longebracteatum]	102.251	45.9078	31.9554	18.0388	24.0123	16.0322	2.47415	1.30693	up
ko00903	Limonene and pinene degradation	0.0397259	MSTRG.1763	HHC002296	K00128	EC:1.2.1.3	LOW QUALITY PROTEIN: aldehyde dehydrogenase family 2 member B7, mitochondrial-like [Asparagus officinalis]	6.2678	3.97913	21.1137	1.83199	2.49058	2.38107	3.40671	1.76838	up
ko00903	Limonene and pinene degradation	0.0397259	MSTRG.29960	HHC038045	K00128	EC:1.2.1.3	aldehyde dehydrogenase family 3 member F1-like [Asparagus officinalis]	11.5084	25.0615	15.9162	16.8047	48.3212	50.8613	0.34931	-1.51742	down
ko00460	Cyanoamino acid metabolism	0.0412893	MSTRG.11207	HHC010287	K00600	EC:2.1.2.1	serine hydroxymethyltransferase 7 isoform X1 [Asparagus officinalis]	16.379	44.2456	68.5786	7.81347	9.11258	9.63259	3.65472	1.86976	up
ko00460	Cyanoamino acid metabolism	0.0412893	MSTRG.12506	HHC012021	K18592	EC:2.3.2.2;EC:3.4.19.13	glutathione hydrolase 1-like isoform X1 [Ziziphus jujuba]	2.89181	42.5227	2.69095	3.29626	2.96713	3.32367	4.08547	2.0305	up
ko00460	Cyanoamino acid metabolism	0.0412893	MSTRG.14291	HHC014792	K18592	EC:2.3.2.2;EC:3.4.19.13	gamma-glutamyl transpeptidase [Allium sativum];gamma-glutamyltranspeptidase 3-like isoform X1 [Asparagus officinalis]	11.9336	13.9216	7.97381	3.36161	2.70338	3.22449	3.13693	1.64935	up
ko00460	Cyanoamino acid metabolism	0.0412893	MSTRG.15951	HHC016926	K18592	EC:2.3.2.2;EC:3.4.19.13	hypothetical protein GW17_00024033 [Ensete ventricosum]	0.719399	1.02684	0.531168	4.25082	6.36626	5.41374	0.27709	-1.85158	down
ko00460	Cyanoamino acid metabolism	0.0412893	MSTRG.17759	HHC019457	K01188	EC:3.2.1.21	beta-glucosidase 31-like isoform X1 [Asparagus officinalis]	51.8504	28.3881	23.8236	13.9352	12.5498	14.593	2.17363	1.12011	up
ko00460	Cyanoamino acid metabolism	0.0412893	MSTRG.24172	HHC029152	K00600	EC:2.1.2.1	serine hydroxymethyltransferase 7 isoform X1 [Asparagus officinalis]	36.5863	35.8123	59.863	17.2885	16.857	15.6073	2.30331	1.20371	up
ko00460	Cyanoamino acid metabolism	0.0412893	MSTRG.32143	HHC048599	K00600	EC:2.1.2.1	serine hydroxymethyltransferase 7 isoform X1 [Asparagus officinalis]	40.5053	109.112	63.6147	19.4703	19.6987	24.3038	2.64419	1.40282	up
ko00460	Cyanoamino acid metabolism	0.0412893	MSTRG.32789	HHC047619	K18592	EC:2.3.2.2;EC:3.4.19.13	gamma-glutamyl transpeptidase [Allium sativum]	27.0159	21.8248	10.9167	7.82066	6.55092	5.12675	2.89348	1.5328	up
ko00460	Cyanoamino acid metabolism	0.0412893	MSTRG.418	HHC000472	K00600	EC:2.1.2.1	serine hydroxymethyltransferase 3, chloroplastic isoform X1 [Asparagus officinalis]	81.7611	59.183	39.2375	23.8683	24.232	25.114	2.06754	1.04792	up
ko00460	Cyanoamino acid metabolism	0.0412893	MSTRG.8392	HHC046922	K01188	EC:3.2.1.21	beta-glucosidase 12-like [Asparagus officinalis]	0.0001	320.613	17.2562	0.0001	0.0001	0.0001	844674	19.688	up
ko00670	One carbon pool by folate	0.0419099	MSTRG.11207	HHC010287	K00600	EC:2.1.2.1	serine hydroxymethyltransferase 7 isoform X1 [Asparagus officinalis]	16.379	44.2456	68.5786	7.81347	9.11258	9.63259	3.65472	1.86976	up
ko00670	One carbon pool by folate	0.0419099	MSTRG.24172	HHC029152	K00600	EC:2.1.2.1	serine hydroxymethyltransferase 7 isoform X1 [Asparagus officinalis]	36.5863	35.8123	59.863	17.2885	16.857	15.6073	2.30331	1.20371	up
ko00670	One carbon pool by folate	0.0419099	MSTRG.32143	HHC048599	K00600	EC:2.1.2.1	serine hydroxymethyltransferase 7 isoform X1 [Asparagus officinalis]	40.5053	109.112	63.6147	19.4703	19.6987	24.3038	2.64419	1.40282	up
ko00670	One carbon pool by folate	0.0419099	MSTRG.418	HHC000472	K00600	EC:2.1.2.1	serine hydroxymethyltransferase 3, chloroplastic isoform X1 [Asparagus officinalis]	81.7611	59.183	39.2375	23.8683	24.232	25.114	2.06754	1.04792	up
ko00670	One carbon pool by folate	0.0419099	MSTRG.9296	HHC007014	K00288	EC:1.5.1.5;EC:3.5.4.9	bifunctional protein FolD 4, chloroplastic-like isoform X1 [Asparagus officinalis]	7.09375	3.01716	4.02488	2.02328	1.54793	1.66879	2.51174	1.32869	up
ko01040	Biosynthesis of unsaturated fatty acids	0.0535873	gene-HHC047933	HHC047933	K03921	EC:1.14.19.2;EC:1.14.19.11	PREDICTED: stearoyl-[acyl-carrier-protein] 9-desaturase 5, chloroplastic-like [Elaeis guineensis]	0.89437	0.867215	0.0001	2.0223	4.36854	4.26874	0.21905	-2.19067	down
ko01040	Biosynthesis of unsaturated fatty acids	0.0535873	MSTRG.14939	HHC015671	K00059	EC:1.1.1.100	uncharacterized protein LOC103720253 [Phoenix dactylifera]	864.773	217.058	87.1327	62.8715	66.7161	70.5074	4.48843	2.16621	up
ko01040	Biosynthesis of unsaturated fatty acids	0.0535873	MSTRG.16933	HHC018260	K00059	EC:1.1.1.100	3-oxoacyl-[acyl-carrier-protein] reductase 4-like [Asparagus officinalis]	12.1033	6.42707	8.7799	9.40775	3.61812	4.20555	2.3466	1.23057	up
ko01040	Biosynthesis of unsaturated fatty acids	0.0535873	MSTRG.19430	HHC021939	K00059	EC:1.1.1.100	short-chain type dehydrogenase/reductase-like [Asparagus officinalis]	9.33348	3.19658	8.47552	0.877816	1.26888	1.17598	4.47537	2.16201	up
ko01040	Biosynthesis of unsaturated fatty acids	0.0535873	MSTRG.33016	HHC047417	K00059	EC:1.1.1.100	uncharacterized protein LOC103720253 [Phoenix dactylifera]	328.118	94.4805	19.8941	15.4426	10.2211	8.16559	12.4529	3.63841	up
ko01040	Biosynthesis of unsaturated fatty acids	0.0535873	MSTRG.33993	HHC053908	K01068	EC:3.1.2.2	uncharacterized protein LOC109825086 [Asparagus officinalis]	5.7147	4.71498	12.5505	23.9265	40.0588	36.684	0.30561	-1.71024	down
ko03008	Ribosome biogenesis in eukaryotes	0.079894	MSTRG.11508	HHC010682	K14568	EC:2.1.1.260	ribosomal RNA small subunit methyltransferase nep-1 [Asparagus officinalis]	20.4944	10.7413	6.22865	3.23421	4.23447	2.92107	2.84385	1.50785	up
ko03008	Ribosome biogenesis in eukaryotes	0.079894	MSTRG.12121	HHC011523	K07936	NA	putative RAN2 small Ras GTP-binding nuclear protein [Allium sativum];PREDICTED: GTP-binding nuclear protein Ran1B-like [Cucumis sativus]	51.3137	40.7733	12.0746	13.5401	12.8209	13.4771	2.23784	1.16211	up
ko03008	Ribosome biogenesis in eukaryotes	0.079894	MSTRG.16971	HHC018302	K07178	EC:2.7.11.1	serine/threonine-protein kinase RIO1-like [Asparagus officinalis]	13.4333	8.46916	15.1917	15.4566	4.79407	3.9364	3.00962	1.58958	up
ko03008	Ribosome biogenesis in eukaryotes	0.079894	MSTRG.19311	HHC021789	K12619	EC:3.1.13.-	5'-3' exoribonuclease [Trema orientale]	3.7001	4.91699	3.07515	9.94887	11.322	12.4285	0.455593	-1.13418	down
ko03008	Ribosome biogenesis in eukaryotes	0.079894	MSTRG.21508	HHC025087	K14290	NA	hypothetical protein PHAVU_011G020900g [Phaseolus vulgaris]	13.7614	7.16465	10.9226	9.5253	16.849	30.2264	0.439444	-1.18625	down
ko03008	Ribosome biogenesis in eukaryotes	0.079894	MSTRG.27017	HHC033630	K11128	NA	PREDICTED: putative H/ACA ribonucleoprotein complex subunit 1-like protein 1 [Elaeis guineensis]	85.1061	41.8818	24.1879	28.509	13.8152	20.6588	2.60609	1.38189	up
ko03008	Ribosome biogenesis in eukaryotes	0.079894	MSTRG.27740	HHC034849	K14554	NA	WD repeat-containing protein 36 [Asparagus officinalis]	6.38433	2.53648	1.86378	2.64255	1.00643	1.27004	2.94911	1.56028	up
ko03008	Ribosome biogenesis in eukaryotes	0.079894	MSTRG.32739	HHC048484	K03115	NA	putative casein kinase II subunit beta-4 isoform X1 [Asparagus officinalis]	2.38144	3.21275	0.491827	3.09889	0.467801	0.922093	3.30418	1.72429	up
ko03008	Ribosome biogenesis in eukaryotes	0.079894	MSTRG.34419	HHC050728	K14558	NA	LOW QUALITY PROTEIN: periodic tryptophan protein 2 homolog [Asparagus officinalis]	18.7617	3.15554	4.86799	3.65519	1.41759	0.473714	8.04747	3.00854	up
ko03008	Ribosome biogenesis in eukaryotes	0.079894	MSTRG.36287	HHC052053	K14565	NA	PREDICTED: probable nucleolar protein 5-2 [Elaeis guineensis]	3.04812	2.58126	1.38814	1.25001	1.06588	0.402096	2.81596	1.49363	up
ko03008	Ribosome biogenesis in eukaryotes	0.079894	MSTRG.3674	HHC005485	K14565	NA	PREDICTED: probable nucleolar protein 5-2 [Musa acuminata subsp. malaccensis]	14.2592	7.55082	13.2429	2.95414	2.68109	2.24922	3.85444	1.94652	up
ko03008	Ribosome biogenesis in eukaryotes	0.079894	MSTRG.6382	HHC043775	K14563	EC:2.1.1.-	mediator of RNA polymerase II transcription subunit 36a-like [Asparagus officinalis]	231.872	107.834	134.638	52.1299	56.2044	63.1193	2.20607	1.14148	up
ko03008	Ribosome biogenesis in eukaryotes	0.079894	MSTRG.9661	HHC007695	K11131	EC:5.4.99.-	PREDICTED: H/ACA ribonucleoprotein complex subunit 4 [Vitis vinifera];Pseudouridine synthase/archaeosine transglycosylase [Macleaya cordata]	2.70008	0.881492	0.825229	0.470416	0.326668	0.267648	4.10322	2.03676	up
ko00943	Isoflavonoid biosynthesis	0.0966855	MSTRG.28534	HHC035961	K13264	EC:2.3.1.115	PREDICTED: malonyl-coenzyme A:anthocyanin 3-O-glucoside-6''-O-malonyltransferase-like [Elaeis guineensis]	50.4243	26.5006	26.6444	26.7977	6.52784	5.62096	5.36543	2.42369	up
ko00943	Isoflavonoid biosynthesis	0.0966855	MSTRG.33891	HHC051549	K13264	EC:2.3.1.115	PREDICTED: malonyl-coenzyme A:anthocyanin 3-O-glucoside-6''-O-malonyltransferase-like [Elaeis guineensis]	250.136	95.646	110.696	62.4912	60.2044	57.0884	2.21228	1.14553	up
ko00630	Glyoxylate and dicarboxylate metabolism	0.101381	MSTRG.11207	HHC010287	K00600	EC:2.1.2.1	serine hydroxymethyltransferase 7 isoform X1 [Asparagus officinalis]	16.379	44.2456	68.5786	7.81347	9.11258	9.63259	3.65472	1.86976	up
ko00630	Glyoxylate and dicarboxylate metabolism	0.101381	MSTRG.13001	HHC012943	K01915	EC:6.3.1.2	glutamine synthetase cytosolic isozyme 1 [Asparagus officinalis];PREDICTED: glutamine synthetase nodule isozyme [Fragaria vesca subsp. vesca]	554.684	539.795	351.762	478.585	236.671	236.545	2.03377	1.02416	up
ko00630	Glyoxylate and dicarboxylate metabolism	0.101381	MSTRG.15528	HHC016376	K03781	EC:1.11.1.6	catalase isozyme 1-like [Asparagus officinalis];catalase [Hypericum perforatum];catalase-1 [Ananas comosus]	822.044	259.211	282.024	153.191	159.006	154.935	2.41522	1.27215	up
ko00630	Glyoxylate and dicarboxylate metabolism	0.101381	MSTRG.24172	HHC029152	K00600	EC:2.1.2.1	serine hydroxymethyltransferase 7 isoform X1 [Asparagus officinalis]	36.5863	35.8123	59.863	17.2885	16.857	15.6073	2.30331	1.20371	up
ko00630	Glyoxylate and dicarboxylate metabolism	0.101381	MSTRG.28545	HHC035987	K22133	EC:6.2.1.8	4-coumarate:CoA ligase-like protein [Ornithogalum longebracteatum]	70.164	36.5696	5.55629	9.62389	9.60177	8.99708	3.27745	1.71258	up
ko00630	Glyoxylate and dicarboxylate metabolism	0.101381	MSTRG.29909	HHC037958	K14272	EC:2.6.1.4;EC:2.6.1.2	uncharacterized protein A4U43_C03F11090 [Asparagus officinalis]	257.012	143.404	114.409	102.859	101.215	36.4626	2.24323	1.16557	up
ko00630	Glyoxylate and dicarboxylate metabolism	0.101381	MSTRG.32143	HHC048599	K00600	EC:2.1.2.1	serine hydroxymethyltransferase 7 isoform X1 [Asparagus officinalis]	40.5053	109.112	63.6147	19.4703	19.6987	24.3038	2.64419	1.40282	up
ko00630	Glyoxylate and dicarboxylate metabolism	0.101381	MSTRG.418	HHC000472	K00600	EC:2.1.2.1	serine hydroxymethyltransferase 3, chloroplastic isoform X1 [Asparagus officinalis]	81.7611	59.183	39.2375	23.8683	24.232	25.114	2.06754	1.04792	up
ko00630	Glyoxylate and dicarboxylate metabolism	0.101381	MSTRG.6079	HHC043367	K22133	EC:6.2.1.8	4-coumarate:CoA ligase-like protein [Ornithogalum longebracteatum]	258.841	101.44	37.1865	16.8567	17.7595	20.1681	5.46204	2.44944	up
ko00630	Glyoxylate and dicarboxylate metabolism	0.101381	MSTRG.6090	HHC043385	K03781	EC:1.11.1.6	PREDICTED: catalase isozyme A [Musa acuminata subsp. malaccensis]	60.3265	30.1465	9.92071	7.24362	7.74981	5.59395	4.03325	2.01194	up
ko00630	Glyoxylate and dicarboxylate metabolism	0.101381	MSTRG.872	HHC001062	K01602	EC:4.1.1.39	ribulose bisphosphate carboxylase small chain, chloroplastic-like [Asparagus officinalis]	412.558	465.875	834.913	739.773	740.872	2272.66	0.407017	-1.29684	down
ko00260	Glycine, serine and threonine metabolism	0.108047	MSTRG.11207	HHC010287	K00600	EC:2.1.2.1	serine hydroxymethyltransferase 7 isoform X1 [Asparagus officinalis]	16.379	44.2456	68.5786	7.81347	9.11258	9.63259	3.65472	1.86976	up
ko00260	Glycine, serine and threonine metabolism	0.108047	MSTRG.23189	HHC027814	K00276	EC:1.4.3.21	PREDICTED: primary amine oxidase-like [Musa acuminata subsp. malaccensis]	51.8155	31.6702	6.06833	7.74501	7.53123	5.41035	3.75916	1.91041	up
ko00260	Glycine, serine and threonine metabolism	0.108047	MSTRG.24172	HHC029152	K00600	EC:2.1.2.1	serine hydroxymethyltransferase 7 isoform X1 [Asparagus officinalis]	36.5863	35.8123	59.863	17.2885	16.857	15.6073	2.30331	1.20371	up
ko00260	Glycine, serine and threonine metabolism	0.108047	MSTRG.2697	HHC003720	K00827	EC:2.6.1.44;EC:2.6.1.40	alanine--glyoxylate aminotransferase 2 homolog 3, mitochondrial-like [Asparagus officinalis]	0.274572	1.28901	1.8126	0.0001	0.0001	0.0001	8440.72	13.0432	up
ko00260	Glycine, serine and threonine metabolism	0.108047	MSTRG.28172	HHC035470	K00276	EC:1.4.3.21	primary amine oxidase-like [Ananas comosus]	58.0545	28.481	15.9121	6.45029	7.01018	5.7235	4.27598	2.09625	up
ko00260	Glycine, serine and threonine metabolism	0.108047	MSTRG.29909	HHC037958	K14272	EC:2.6.1.4;EC:2.6.1.2	uncharacterized protein A4U43_C03F11090 [Asparagus officinalis]	257.012	143.404	114.409	102.859	101.215	36.4626	2.24323	1.16557	up
ko00260	Glycine, serine and threonine metabolism	0.108047	MSTRG.32143	HHC048599	K00600	EC:2.1.2.1	serine hydroxymethyltransferase 7 isoform X1 [Asparagus officinalis]	40.5053	109.112	63.6147	19.4703	19.6987	24.3038	2.64419	1.40282	up
ko00260	Glycine, serine and threonine metabolism	0.108047	MSTRG.34374	HHC052415	K01733	EC:4.2.3.1	LOW QUALITY PROTEIN: threonine synthase, chloroplastic-like [Asparagus officinalis]	8.56875	9.12659	9.23811	4.81495	4.28905	2.42522	2.36425	1.24138	up
ko00260	Glycine, serine and threonine metabolism	0.108047	MSTRG.418	HHC000472	K00600	EC:2.1.2.1	serine hydroxymethyltransferase 3, chloroplastic isoform X1 [Asparagus officinalis]	81.7611	59.183	39.2375	23.8683	24.232	25.114	2.06754	1.04792	up
ko00430	Taurine and hypotaurine metabolism	0.108812	MSTRG.12506	HHC012021	K18592	EC:2.3.2.2;EC:3.4.19.13	glutathione hydrolase 1-like isoform X1 [Ziziphus jujuba]	2.89181	42.5227	2.69095	3.29626	2.96713	3.32367	4.08547	2.0305	up
ko00430	Taurine and hypotaurine metabolism	0.108812	MSTRG.14291	HHC014792	K18592	EC:2.3.2.2;EC:3.4.19.13	gamma-glutamyl transpeptidase [Allium sativum];gamma-glutamyltranspeptidase 3-like isoform X1 [Asparagus officinalis]	11.9336	13.9216	7.97381	3.36161	2.70338	3.22449	3.13693	1.64935	up
ko00430	Taurine and hypotaurine metabolism	0.108812	MSTRG.15951	HHC016926	K18592	EC:2.3.2.2;EC:3.4.19.13	hypothetical protein GW17_00024033 [Ensete ventricosum]	0.719399	1.02684	0.531168	4.25082	6.36626	5.41374	0.27709	-1.85158	down
ko00430	Taurine and hypotaurine metabolism	0.108812	MSTRG.32789	HHC047619	K18592	EC:2.3.2.2;EC:3.4.19.13	gamma-glutamyl transpeptidase [Allium sativum]	27.0159	21.8248	10.9167	7.82066	6.55092	5.12675	2.89348	1.5328	up
ko00450	Selenocompound metabolism	0.11684	MSTRG.11782	HHC011078	K01739	EC:2.5.1.48	uncharacterized protein A4U43_C03F17520 [Asparagus officinalis]	14.3254	6.34422	9.35239	2.79686	2.89253	2.22422	3.207	1.68123	up
ko00450	Selenocompound metabolism	0.11684	MSTRG.12877	HHC012717	K00816	EC:2.6.1.7;EC:4.4.1.13	PREDICTED: uncharacterized protein LOC105058225 [Elaeis guineensis];Methionine aminotransferase [Ananas comosus]	120.807	190.845	243.401	82.4547	78.3759	74.0699	2.09093	1.06415	up
ko00450	Selenocompound metabolism	0.11684	MSTRG.13742	HHC014031	K00384	EC:1.8.1.9	putative germin-like protein 2-1 [Phoenix dactylifera]	1.9924	1.72087	0.0512292	0.225708	0.0001	0.0001	9975.5	13.2842	up
ko00450	Selenocompound metabolism	0.11684	MSTRG.15026	HHC015774	K13811	EC:2.7.7.4;EC:2.7.1.25	ATP-sulfurylase [Allium cepa]	5.38357	44.5817	90.2161	11.4356	12.6451	11.9036	3.08809	1.62672	up
ko00450	Selenocompound metabolism	0.11684	MSTRG.21069	HHC024353	K01761	EC:4.4.1.11	PREDICTED: methionine gamma-lyase-like [Musa acuminata subsp. malaccensis]	119.871	90.3865	161.568	48.9978	46.2733	43.9861	2.33119	1.22107	up
ko00053	Ascorbate and aldarate metabolism	0.121815	MSTRG.16389	HHC017477	K17744;K05275	EC:1.1.1.316;EC:1.1.1.65	probable aldo-keto reductase 1 [Phoenix dactylifera];PREDICTED: probable aldo-keto reductase 1 [Elaeis guineensis]	190.086	61.5386	29.1413	21.9399	13.1192	20.4253	4.512	2.17377	up
ko00053	Ascorbate and aldarate metabolism	0.121815	MSTRG.17212	HHC018631	K00423	EC:1.10.3.3	PREDICTED: L-ascorbate oxidase [Elaeis guineensis]	37.9957	17.5889	1.46807	2.75158	2.62666	1.68786	6.93059	2.79298	up
ko00053	Ascorbate and aldarate metabolism	0.121815	MSTRG.1763	HHC002296	K00128	EC:1.2.1.3	LOW QUALITY PROTEIN: aldehyde dehydrogenase family 2 member B7, mitochondrial-like [Asparagus officinalis]	6.2678	3.97913	21.1137	1.83199	2.49058	2.38107	3.40671	1.76838	up
ko00053	Ascorbate and aldarate metabolism	0.121815	MSTRG.19479	HHC022005	K17744	EC:1.1.1.316	Aldo/keto reductase/potassium channel subunit beta [Trema orientale]	4.72049	4.16786	3.28387	1.64001	1.64178	1.423	2.25338	1.17209	up
ko00053	Ascorbate and aldarate metabolism	0.121815	MSTRG.21762	HHC025399	K19642	EC:1.1.1.365	non-functional NADPH-dependent codeinone reductase 2-like [Phoenix dactylifera];Aldo/keto reductase [Macleaya cordata]	81.9718	24.0519	8.03082	1.3927	4.58465	3.28233	7.33745	2.87528	up
ko00053	Ascorbate and aldarate metabolism	0.121815	MSTRG.29960	HHC038045	K00128	EC:1.2.1.3	aldehyde dehydrogenase family 3 member F1-like [Asparagus officinalis]	11.5084	25.0615	15.9162	16.8047	48.3212	50.8613	0.34931	-1.51742	down
ko00053	Ascorbate and aldarate metabolism	0.121815	MSTRG.8826	HHC006401	K21888	EC:1.8.5.1;EC:2.5.1.18	glutathione S-transferase DHAR2-like [Asparagus officinalis]	548.086	1199.05	396.466	230.622	209.069	216.652	2.78847	1.47947	up
ko00780	Biotin metabolism	0.133943	MSTRG.14939	HHC015671	K00059	EC:1.1.1.100	uncharacterized protein LOC103720253 [Phoenix dactylifera]	864.773	217.058	87.1327	62.8715	66.7161	70.5074	4.48843	2.16621	up
ko00780	Biotin metabolism	0.133943	MSTRG.16933	HHC018260	K00059	EC:1.1.1.100	3-oxoacyl-[acyl-carrier-protein] reductase 4-like [Asparagus officinalis]	12.1033	6.42707	8.7799	9.40775	3.61812	4.20555	2.3466	1.23057	up
ko00780	Biotin metabolism	0.133943	MSTRG.19430	HHC021939	K00059	EC:1.1.1.100	short-chain type dehydrogenase/reductase-like [Asparagus officinalis]	9.33348	3.19658	8.47552	0.877816	1.26888	1.17598	4.47537	2.16201	up
ko00780	Biotin metabolism	0.133943	MSTRG.33016	HHC047417	K00059	EC:1.1.1.100	uncharacterized protein LOC103720253 [Phoenix dactylifera]	328.118	94.4805	19.8941	15.4426	10.2211	8.16559	12.4529	3.63841	up
ko00902	Monoterpenoid biosynthesis	0.155846	MSTRG.11428	HHC010589	K07385	EC:4.2.3.108	terpene synthase 10-like [Ananas comosus]	4.99654	30.2396	1.00837	0.118029	0.27682	0.0001	65.6554	6.03684	up
ko00902	Monoterpenoid biosynthesis	0.155846	MSTRG.2808	HHC003898	K07385	EC:4.2.3.108	Myrcene synthase, chloroplastic, partial [Ananas comosus]	5.98142	9.47754	2.54526	0.288497	0.590728	0.0001	15.4806	3.95239	up
ko00410	beta-Alanine metabolism	0.161189	MSTRG.1763	HHC002296	K00128	EC:1.2.1.3	LOW QUALITY PROTEIN: aldehyde dehydrogenase family 2 member B7, mitochondrial-like [Asparagus officinalis]	6.2678	3.97913	21.1137	1.83199	2.49058	2.38107	3.40671	1.76838	up
ko00410	beta-Alanine metabolism	0.161189	MSTRG.23189	HHC027814	K00276	EC:1.4.3.21	PREDICTED: primary amine oxidase-like [Musa acuminata subsp. malaccensis]	51.8155	31.6702	6.06833	7.74501	7.53123	5.41035	3.75916	1.91041	up
ko00410	beta-Alanine metabolism	0.161189	MSTRG.28172	HHC035470	K00276	EC:1.4.3.21	primary amine oxidase-like [Ananas comosus]	58.0545	28.481	15.9121	6.45029	7.01018	5.7235	4.27598	2.09625	up
ko00410	beta-Alanine metabolism	0.161189	MSTRG.29960	HHC038045	K00128	EC:1.2.1.3	aldehyde dehydrogenase family 3 member F1-like [Asparagus officinalis]	11.5084	25.0615	15.9162	16.8047	48.3212	50.8613	0.34931	-1.51742	down
ko00061	Fatty acid biosynthesis	0.174981	gene-HHC047933	HHC047933	K03921	EC:1.14.19.2;EC:1.14.19.11	PREDICTED: stearoyl-[acyl-carrier-protein] 9-desaturase 5, chloroplastic-like [Elaeis guineensis]	0.89437	0.867215	0.0001	2.0223	4.36854	4.26874	0.21905	-2.19067	down
ko00061	Fatty acid biosynthesis	0.174981	MSTRG.14939	HHC015671	K00059	EC:1.1.1.100	uncharacterized protein LOC103720253 [Phoenix dactylifera]	864.773	217.058	87.1327	62.8715	66.7161	70.5074	4.48843	2.16621	up
ko00061	Fatty acid biosynthesis	0.174981	MSTRG.16933	HHC018260	K00059	EC:1.1.1.100	3-oxoacyl-[acyl-carrier-protein] reductase 4-like [Asparagus officinalis]	12.1033	6.42707	8.7799	9.40775	3.61812	4.20555	2.3466	1.23057	up
ko00061	Fatty acid biosynthesis	0.174981	MSTRG.19430	HHC021939	K00059	EC:1.1.1.100	short-chain type dehydrogenase/reductase-like [Asparagus officinalis]	9.33348	3.19658	8.47552	0.877816	1.26888	1.17598	4.47537	2.16201	up
ko00061	Fatty acid biosynthesis	0.174981	MSTRG.20364	HHC023225	K01897	EC:6.2.1.3	long chain acyl-CoA synthetase 6, peroxisomal-like [Asparagus officinalis]	4.68007	9.27296	11.7326	12.8165	25.6963	20.3234	0.418322	-1.25731	down
ko00061	Fatty acid biosynthesis	0.174981	MSTRG.33016	HHC047417	K00059	EC:1.1.1.100	uncharacterized protein LOC103720253 [Phoenix dactylifera]	328.118	94.4805	19.8941	15.4426	10.2211	8.16559	12.4529	3.63841	up
ko00402	Benzoxazinoid biosynthesis	0.188383	MSTRG.25370	HHC030873	K13229	EC:1.14.11.59	1-aminocyclopropane-1-carboxylate oxidase homolog 3-like isoform X2 [Phoenix dactylifera]	18.8388	21.1864	9.33384	6.15522	7.86142	4.36332	2.27057	1.18306	up
ko00960	Tropane, piperidine and pyridine alkaloid biosynthesis	0.196252	MSTRG.23189	HHC027814	K00276	EC:1.4.3.21	PREDICTED: primary amine oxidase-like [Musa acuminata subsp. malaccensis]	51.8155	31.6702	6.06833	7.74501	7.53123	5.41035	3.75916	1.91041	up
ko00960	Tropane, piperidine and pyridine alkaloid biosynthesis	0.196252	MSTRG.23681	HHC028484	K00815	EC:2.6.1.5	nicotianamine aminotransferase A-like isoform X1 [Asparagus officinalis]	19.9789	9.28176	1.74716	2.90574	2.73313	2.03488	3.55637	1.83041	up
ko00960	Tropane, piperidine and pyridine alkaloid biosynthesis	0.196252	MSTRG.28172	HHC035470	K00276	EC:1.4.3.21	primary amine oxidase-like [Ananas comosus]	58.0545	28.481	15.9121	6.45029	7.01018	5.7235	4.27598	2.09625	up
ko00960	Tropane, piperidine and pyridine alkaloid biosynthesis	0.196252	MSTRG.8437	HHC046989	K00815	EC:2.6.1.5	uncharacterized protein LOC110102404 isoform X1 [Dendrobium catenatum]	29.4044	7.40646	17.0067	3.35214	2.23206	2.49231	6.05051	2.59706	up
ko00360	Phenylalanine metabolism	0.197132	gene-HHC017860	HHC017860	K01593	EC:4.1.1.28;EC:4.1.1.105	tyrosine/DOPA decarboxylase 1-like [Phoenix dactylifera]	1.3187	1.14596	0.135055	0.125317	0.0001	0.0562091	24.197	4.59676	up
ko00360	Phenylalanine metabolism	0.197132	MSTRG.23189	HHC027814	K00276	EC:1.4.3.21	PREDICTED: primary amine oxidase-like [Musa acuminata subsp. malaccensis]	51.8155	31.6702	6.06833	7.74501	7.53123	5.41035	3.75916	1.91041	up
ko00360	Phenylalanine metabolism	0.197132	MSTRG.23681	HHC028484	K00815	EC:2.6.1.5	nicotianamine aminotransferase A-like isoform X1 [Asparagus officinalis]	19.9789	9.28176	1.74716	2.90574	2.73313	2.03488	3.55637	1.83041	up
ko00360	Phenylalanine metabolism	0.197132	MSTRG.28172	HHC035470	K00276	EC:1.4.3.21	primary amine oxidase-like [Ananas comosus]	58.0545	28.481	15.9121	6.45029	7.01018	5.7235	4.27598	2.09625	up
ko00360	Phenylalanine metabolism	0.197132	MSTRG.33550	HHC053582	K00588	EC:2.1.1.104	PREDICTED: caffeoyl-CoA O-methyltransferase [Nelumbo nucifera];caffeoyl-CoA O-methyltransferase [Amborella trichopoda]	40.8055	41.279	23.6435	17.0126	13.2273	13.0112	2.33894	1.22585	up
ko00360	Phenylalanine metabolism	0.197132	MSTRG.8437	HHC046989	K00815	EC:2.6.1.5	uncharacterized protein LOC110102404 isoform X1 [Dendrobium catenatum]	29.4044	7.40646	17.0067	3.35214	2.23206	2.49231	6.05051	2.59706	up
ko04075	Plant hormone signal transduction	0.20776	gene-HHC028271	HHC028271	K14514	NA	phosphate transporter PHO1-3 [Asparagus officinalis]	2.36769	5.18035	0.566625	0.659597	0.693742	0.533915	3.57358	1.83737	up
ko04075	Plant hormone signal transduction	0.20776	MSTRG.1001	HHC001230	K14514	NA	phosphate transporter PHO1-3 [Asparagus officinalis]	58.4779	38.411	0.456407	1.02657	1.13103	0.736713	26.3344	4.71888	up
ko04075	Plant hormone signal transduction	0.20776	MSTRG.10840	HHC009755	K13413	EC:2.7.12.2	mitogen-activated protein kinase kinase 5-like [Phoenix dactylifera]	61.329	23.6953	25.4444	11.6879	16.0973	11.2886	2.23029	1.15723	up
ko04075	Plant hormone signal transduction	0.20776	MSTRG.10910	HHC009858	K14488	NA	PREDICTED: auxin-induced protein 15A [Elaeis guineensis]	21.5712	17.5136	1.34731	0.753846	1.58062	0.893751	8.32253	3.05702	up
ko04075	Plant hormone signal transduction	0.20776	MSTRG.1621	HHC002079	K14488	NA	PREDICTED: auxin-induced protein 15A [Elaeis guineensis]	1.67522	1.06321	0.0695776	0.0538007	0.0001	0.042203	33.8251	5.08002	up
ko04075	Plant hormone signal transduction	0.20776	MSTRG.17173	HHC018564	K14495	NA	F-box protein GID2-like isoform X1 [Phoenix dactylifera]	75.7251	60.1922	51.6412	28.43	21.8112	20.2112	2.56992	1.36173	up
ko04075	Plant hormone signal transduction	0.20776	MSTRG.18248	HHC020380	K14488	NA	PREDICTED: indole-3-acetic acid-induced protein ARG7-like [Musa acuminata subsp. malaccensis]	60.5085	34.8312	21.1896	17.185	18.2233	11.5515	2.24543	1.16699	up
ko04075	Plant hormone signal transduction	0.20776	MSTRG.18753	HHC021031	K14488	NA	PREDICTED: auxin-responsive protein SAUR32-like [Elaeis guineensis]	26.1489	18.9563	11.6213	6.90066	5.45206	6.59872	2.63996	1.40052	up
ko04075	Plant hormone signal transduction	0.20776	MSTRG.20196	HHC022990	K14495	NA	F-box protein GID2-like isoform X1 [Phoenix dactylifera]	61.5588	84.2762	44.6206	30.5839	25.2467	23.982	2.24503	1.16673	up
ko04075	Plant hormone signal transduction	0.20776	MSTRG.20324	HHC023171	K13415	EC:2.7.10.1;EC:2.7.11.1	brassinosteroid LRR receptor kinase BRL1-like [Asparagus officinalis]	4.87263	2.50929	1.18843	2.80132	0.418866	0.938708	4.18823	2.06634	up
ko04075	Plant hormone signal transduction	0.20776	MSTRG.2283	HHC003057	K12126;K16189	NA	unnamed protein product [Brassica oleracea];PREDICTED: transcription factor UNE10-like isoform X4 [Elaeis guineensis];putative transcription factor bHLH family [Rosa chinensis]	18.4328	13.1253	13.2117	8.00727	5.30082	7.75009	2.02197	1.01576	up
ko04075	Plant hormone signal transduction	0.20776	MSTRG.24130	HHC029096	K13946	NA	auxin transporter-like protein 3 [Asparagus officinalis]	238.432	268.055	120.694	93.8326	76.5127	98.4717	2.06022	1.0428	up
ko04075	Plant hormone signal transduction	0.20776	MSTRG.25242	HHC030637	K14493	EC:3.-.-.-	PREDICTED: probable carboxylesterase 17 [Elaeis guineensis]	23.3385	38.185	3.2287	6.24078	0.946071	0.553916	23.6645	4.56465	up
ko04075	Plant hormone signal transduction	0.20776	MSTRG.26780	HHC033202	K12126	NA	transcription factor bHLH130-like [Dendrobium catenatum]	28.1666	54.2121	7.39517	8.34814	9.2068	6.71592	3.0812	1.62349	up
ko04075	Plant hormone signal transduction	0.20776	MSTRG.2936	HHC004114	K14493	EC:3.-.-.-	PREDICTED: probable carboxylesterase 15 [Elaeis guineensis]	111.189	105.878	53.954	35.6065	37.8329	32.7539	2.17198	1.11901	up
ko04075	Plant hormone signal transduction	0.20776	MSTRG.30293	HHC038579	K14512	EC:2.7.11.24	LOW QUALITY PROTEIN: mitogen-activated protein kinase 1-like [Asparagus officinalis]	1.32711	1.19387	0.90092	0.624535	0.356259	0.199463	3.6407	1.86422	up
ko04075	Plant hormone signal transduction	0.20776	MSTRG.30900	HHC039445	K13422	NA	transcription factor EAT1-like isoform X1 [Asparagus officinalis]	9.73631	13.0279	10.3687	16.0615	31.5621	26.2583	0.425408	-1.23308	down
ko04075	Plant hormone signal transduction	0.20776	MSTRG.31731	HHC040469	K14488	NA	hypothetical protein GW17_00035730 [Ensete ventricosum]	1.13144	0.409217	0.994868	0.709829	0.208417	0.249102	3.54669	1.82647	up
ko04075	Plant hormone signal transduction	0.20776	MSTRG.32080	HHC048386	K14486	NA	auxin response factor 7-like [Asparagus officinalis]	3.95801	1.03131	3.5025	3.26217	1.08641	0.632648	3.41874	1.77346	up
ko04075	Plant hormone signal transduction	0.20776	MSTRG.32082	HHC048392	K12126	NA	transcription factor PIF3-like [Asparagus officinalis]	1.40741	1.64664	1.69441	3.46548	5.14204	4.75095	0.415139	-1.26833	down
ko04075	Plant hormone signal transduction	0.20776	MSTRG.33092	HHC049549	K14488	NA	auxin-responsive protein SAUR32-like [Phoenix dactylifera]	11.3841	4.99095	4.6922	0.555373	0.156291	1.68226	5.88036	2.5559	up
ko04075	Plant hormone signal transduction	0.20776	MSTRG.33498	HHC052932	K14488	NA	PREDICTED: auxin-responsive protein SAUR32-like [Elaeis guineensis]	665.543	173.664	101.577	50.4738	50.361	58.8649	4.53765	2.18195	up
ko04075	Plant hormone signal transduction	0.20776	MSTRG.33820	HHC050738	K14484	NA	auxin-responsive protein IAA18-like [Asparagus officinalis]	0.0621761	0.0988654	0.0710935	0.123156	0.304756	0.394216	0.254152	-1.97624	down
ko04075	Plant hormone signal transduction	0.20776	MSTRG.34845	HHC053369	K13464	NA	protein TIFY 3-like [Asparagus officinalis]	26.0194	27.0771	18.1788	8.95148	9.08663	8.06966	2.33812	1.22535	up
ko04075	Plant hormone signal transduction	0.20776	MSTRG.7231	HHC044822	K14516	NA	PREDICTED: ethylene-responsive transcription factor 1B-like [Eucalyptus grandis]	3.17334	5.65654	5.429	0.262647	0.196865	0.0001	36.8632	5.20411	up
ko04075	Plant hormone signal transduction	0.20776	MSTRG.7987	HHC046253	K14491	NA	myb family transcription factor EFM-like [Asparagus officinalis]	24.8814	26.5389	6.84054	3.09809	3.17852	4.3644	4.06732	2.02408	up
ko04075	Plant hormone signal transduction	0.20776	MSTRG.8236	HHC046672	K14515	NA	hypothetical protein BHE74_00046053, partial [Ensete ventricosum]	1.2004	0.110458	2.77289	0.199321	0.212606	0.0752685	7.43912	2.89513	up
ko00471	D-Glutamine and D-glutamate metabolism	0.212233	MSTRG.19440	HHC021949	K00261	EC:1.4.1.3	glutamate dehydrogenase 1, mitochondrial [Asparagus officinalis]	182.674	495.758	24.5639	80.2749	30.4986	28.6154	6.62509	2.72794	up
ko04933	AGE-RAGE signaling pathway in diabetic complications	0.227075	gene-HHC043529	HHC043529	K06236	NA	putative Myb family transcription factor At1g14600 isoform X1 [Asparagus officinalis]	0.0001	0.0001	0.0001	0.169087	0.563955	0.876938	0.0587785	-4.08857	down
ko04933	AGE-RAGE signaling pathway in diabetic complications	0.227075	gene-HHC054020	HHC054020	K06236	NA	protein PHOSPHATE STARVATION RESPONSE 1-like isoform X1 [Phoenix dactylifera]	6.79458	10.6872	0.479813	1.31934	1.51654	0.276683	5.37605	2.42655	up
ko04933	AGE-RAGE signaling pathway in diabetic complications	0.227075	MSTRG.17246	HHC018688	K06236	NA	protein PHOSPHATE STARVATION RESPONSE 1-like isoform X1 [Asparagus officinalis]	24.5985	26.7186	2.29661	3.49885	2.7794	4.25991	4.05669	2.0203	up
ko04933	AGE-RAGE signaling pathway in diabetic complications	0.227075	MSTRG.5740	HHC042886	K04392	NA	rac-like GTP-binding protein ARAC5 [Cinnamomum micranthum f. kanehirae]	14.2748	10.0428	16.2997	8.65286	6.6937	4.85884	2.13243	1.0925	up
ko04130	SNARE interactions in vesicular transport	0.252553	MSTRG.10105	HHC008604	K08492	NA	PREDICTED: syntaxin-81 [Elaeis guineensis]	0.83729	0.859222	0.60395	0.750176	0.0001	0.0001	7626.59	12.8968	up
ko04130	SNARE interactions in vesicular transport	0.252553	MSTRG.16273	HHC017345	K08498	NA	PREDICTED: syntaxin-61 [Elaeis guineensis]	15.9547	9.9293	10.8649	10.0647	5.22291	3.43589	2.70324	1.43469	up
ko04130	SNARE interactions in vesicular transport	0.252553	MSTRG.3383	HHC004950	K08486	NA	PREDICTED: syntaxin-121-like [Elaeis guineensis]	31.9754	24.2439	55.9823	12.3407	10.5061	10.2728	2.99683	1.58344	up
ko04130	SNARE interactions in vesicular transport	0.252553	MSTRG.36292	HHC053203	K08486	NA	PREDICTED: syntaxin-132-like [Elaeis guineensis]	2.31838	1.99697	0.361667	0.482677	0.258678	0.447833	3.65153	1.8685	up
ko00250	Alanine, aspartate and glutamate metabolism	0.255012	MSTRG.13001	HHC012943	K01915	EC:6.3.1.2	glutamine synthetase cytosolic isozyme 1 [Asparagus officinalis];PREDICTED: glutamine synthetase nodule isozyme [Fragaria vesca subsp. vesca]	554.684	539.795	351.762	478.585	236.671	236.545	2.03377	1.02416	up
ko00250	Alanine, aspartate and glutamate metabolism	0.255012	MSTRG.19440	HHC021949	K00261	EC:1.4.1.3	glutamate dehydrogenase 1, mitochondrial [Asparagus officinalis]	182.674	495.758	24.5639	80.2749	30.4986	28.6154	6.62509	2.72794	up
ko00250	Alanine, aspartate and glutamate metabolism	0.255012	MSTRG.2697	HHC003720	K00827	EC:2.6.1.44;EC:2.6.1.40	alanine--glyoxylate aminotransferase 2 homolog 3, mitochondrial-like [Asparagus officinalis]	0.274572	1.28901	1.8126	0.0001	0.0001	0.0001	8440.72	13.0432	up
ko00250	Alanine, aspartate and glutamate metabolism	0.255012	MSTRG.29909	HHC037958	K14272	EC:2.6.1.4;EC:2.6.1.2	uncharacterized protein A4U43_C03F11090 [Asparagus officinalis]	257.012	143.404	114.409	102.859	101.215	36.4626	2.24323	1.16557	up
ko00250	Alanine, aspartate and glutamate metabolism	0.255012	MSTRG.9936	HHC008303	K01953	EC:6.3.5.4	LOC109848100 gene product [Asparagus officinalis]	3.85297	23.1341	7.4405	0.58006	0.0001	0.0001	87519	16.4173	up
ko00220	Arginine biosynthesis	0.259016	MSTRG.13001	HHC012943	K01915	EC:6.3.1.2	glutamine synthetase cytosolic isozyme 1 [Asparagus officinalis];PREDICTED: glutamine synthetase nodule isozyme [Fragaria vesca subsp. vesca]	554.684	539.795	351.762	478.585	236.671	236.545	2.03377	1.02416	up
ko00220	Arginine biosynthesis	0.259016	MSTRG.16558	HHC017748	K00145	EC:1.2.1.38	probable N-acetyl-gamma-glutamyl-phosphate reductase, chloroplastic isoform X1 [Asparagus officinalis]	9.39492	9.23271	14.676	16.4948	1.3802	1.86288	7.67763	2.94066	up
ko00220	Arginine biosynthesis	0.259016	MSTRG.19440	HHC021949	K00261	EC:1.4.1.3	glutamate dehydrogenase 1, mitochondrial [Asparagus officinalis]	182.674	495.758	24.5639	80.2749	30.4986	28.6154	6.62509	2.72794	up
ko00220	Arginine biosynthesis	0.259016	MSTRG.29909	HHC037958	K14272	EC:2.6.1.4;EC:2.6.1.2	uncharacterized protein A4U43_C03F11090 [Asparagus officinalis]	257.012	143.404	114.409	102.859	101.215	36.4626	2.24323	1.16557	up
ko00515	Mannose type O-glycan biosyntheis	0.279669	gene-HHC001596	HHC001596	K18207	EC:2.4.1.312	PREDICTED: uncharacterized protein LOC103990157 [Musa acuminata subsp. malaccensis]	1.18167	0.406461	0.0001	0.0001	0.0001	0.0001	3970.84	11.9552	up
ko00592	alpha-Linolenic acid metabolism	0.300267	MSTRG.11750	HHC011039	K10528	EC:4.1.2.-	PREDICTED: probable inactive linolenate hydroperoxide lyase [Elaeis guineensis]	25.923	30.8506	30.5692	13.3279	14.704	2.14046	2.98823	1.57929	up
ko00592	alpha-Linolenic acid metabolism	0.300267	MSTRG.13736	HHC014023	K10525	EC:5.3.99.6	allene oxide cyclase [Gladiolus hybrid cultivar];allene oxide cyclase, chloroplastic-like [Ananas comosus]	0.579552	8.62759	0.265222	0.606013	0.468653	0.557549	4.91053	2.29588	up
ko00592	alpha-Linolenic acid metabolism	0.300267	MSTRG.18667	HHC020899	K10526	EC:6.2.1.-	PREDICTED: LOW QUALITY PROTEIN: 4-coumarate--CoA ligase-like 4 [Elaeis guineensis]	52.4304	16.0432	6.95123	6.70479	5.67794	6.18701	3.46102	1.7912	up
ko00592	alpha-Linolenic acid metabolism	0.300267	MSTRG.20989	HHC024220	K05894	EC:1.3.1.42	uncharacterized protein A4U43_C04F28030 [Asparagus officinalis]	18.3722	113.865	90.7678	9.61275	4.72304	7.07129	9.86142	3.3018	up
ko00592	alpha-Linolenic acid metabolism	0.300267	MSTRG.22787	HHC027235	K05894	EC:1.3.1.42	putative 12-oxophytodienoate reductase 4 [Dendrobium catenatum]	0.146104	265.206	14.5693	0.631167	0.808609	0.9577	79.4177	6.31139	up
ko00071	Fatty acid degradation	0.311788	MSTRG.1763	HHC002296	K00128	EC:1.2.1.3	LOW QUALITY PROTEIN: aldehyde dehydrogenase family 2 member B7, mitochondrial-like [Asparagus officinalis]	6.2678	3.97913	21.1137	1.83199	2.49058	2.38107	3.40671	1.76838	up
ko00071	Fatty acid degradation	0.311788	MSTRG.20364	HHC023225	K01897	EC:6.2.1.3	long chain acyl-CoA synthetase 6, peroxisomal-like [Asparagus officinalis]	4.68007	9.27296	11.7326	12.8165	25.6963	20.3234	0.418322	-1.25731	down
ko00071	Fatty acid degradation	0.311788	MSTRG.26083	HHC032127	K18880	EC:5.3.3.8	PREDICTED: enoyl-CoA delta isomerase 2, peroxisomal-like [Musa acuminata subsp. malaccensis]	25.1605	16.9351	14.6061	8.76252	6.87543	6.53399	2.44098	1.28746	up
ko00071	Fatty acid degradation	0.311788	MSTRG.29960	HHC038045	K00128	EC:1.2.1.3	aldehyde dehydrogenase family 3 member F1-like [Asparagus officinalis]	11.5084	25.0615	15.9162	16.8047	48.3212	50.8613	0.34931	-1.51742	down
ko00071	Fatty acid degradation	0.311788	MSTRG.32270	HHC048448	K18880	EC:5.3.3.8	PREDICTED: enoyl-CoA delta isomerase 1, peroxisomal [Musa acuminata subsp. malaccensis]	6.92841	6.28326	5.92927	3.00651	2.53169	2.30185	2.29102	1.19599	up
ko00350	Tyrosine metabolism	0.323367	gene-HHC017860	HHC017860	K01593	EC:4.1.1.28;EC:4.1.1.105	tyrosine/DOPA decarboxylase 1-like [Phoenix dactylifera]	1.3187	1.14596	0.135055	0.125317	0.0001	0.0562091	24.197	4.59676	up
ko00350	Tyrosine metabolism	0.323367	MSTRG.23189	HHC027814	K00276	EC:1.4.3.21	PREDICTED: primary amine oxidase-like [Musa acuminata subsp. malaccensis]	51.8155	31.6702	6.06833	7.74501	7.53123	5.41035	3.75916	1.91041	up
ko00350	Tyrosine metabolism	0.323367	MSTRG.23681	HHC028484	K00815	EC:2.6.1.5	nicotianamine aminotransferase A-like isoform X1 [Asparagus officinalis]	19.9789	9.28176	1.74716	2.90574	2.73313	2.03488	3.55637	1.83041	up
ko00350	Tyrosine metabolism	0.323367	MSTRG.28172	HHC035470	K00276	EC:1.4.3.21	primary amine oxidase-like [Ananas comosus]	58.0545	28.481	15.9121	6.45029	7.01018	5.7235	4.27598	2.09625	up
ko00350	Tyrosine metabolism	0.323367	MSTRG.8437	HHC046989	K00815	EC:2.6.1.5	uncharacterized protein LOC110102404 isoform X1 [Dendrobium catenatum]	29.4044	7.40646	17.0067	3.35214	2.23206	2.49231	6.05051	2.59706	up
ko04120	Ubiquitin mediated proteolysis	0.335977	gene-HHC042570	HHC042570	K03094	NA	NAC domain-containing protein 35-like [Asparagus officinalis]	6.18395	5.71707	0.463664	0.339319	0.457792	0.0001	13.8723	3.79413	up
ko04120	Ubiquitin mediated proteolysis	0.335977	gene-HHC048956	HHC048956	K03349	NA	anaphase-promoting complex subunit 2 [Asparagus officinalis]	0.341345	0.121965	0.609742	0.196985	0.037934	0.0665365	6.07845	2.6037	up
ko04120	Ubiquitin mediated proteolysis	0.335977	MSTRG.10339	HHC008962	K10581	EC:2.3.2.24	uncharacterized protein LOC109845325 [Asparagus officinalis]	13.5138	3.3401	2.90875	1.05968	1.73104	1.64938	3.07985	1.62286	up
ko04120	Ubiquitin mediated proteolysis	0.335977	MSTRG.15210	HHC015968	K03868	EC:2.3.2.32	GEM-like protein 1 [Ananas comosus];PREDICTED: GEM-like protein 1 [Musa acuminata subsp. malaccensis]	11.2615	19.6428	5.58189	3.18694	3.65891	0.884531	4.36599	2.12631	up
ko04120	Ubiquitin mediated proteolysis	0.335977	MSTRG.15913	HHC016870	K03094	NA	SKP1-like protein 1A [Asparagus officinalis]	231.846	119.328	159.363	78.4295	70.714	69.8684	2.09474	1.06677	up
ko04120	Ubiquitin mediated proteolysis	0.335977	MSTRG.17936	HHC019795	K10599	EC:2.3.2.27	pre-mRNA-processing factor 19-like [Asparagus officinalis]	38.0539	25.1154	18.1818	5.77411	6.32063	5.53347	3.6749	1.8777	up
ko04120	Ubiquitin mediated proteolysis	0.335977	MSTRG.18308	HHC020469	K10581	EC:2.3.2.24	uncharacterized protein LOC109845325 [Asparagus officinalis]	187.087	63.2791	30.2294	34.5658	28.3429	26.9262	2.85116	1.51155	up
ko04120	Ubiquitin mediated proteolysis	0.335977	MSTRG.23796	HHC028639	K03350	NA	PREDICTED: uncharacterized protein LOC105048063 [Elaeis guineensis]	41.5428	30.2354	9.81151	9.47245	8.72603	9.22119	2.53694	1.34309	up
ko04120	Ubiquitin mediated proteolysis	0.335977	MSTRG.25849	HHC031745	K06689	EC:2.3.2.23	ubiquitin-conjugating enzyme E2-17 kDa-like [Asparagus officinalis]	0.311395	0.345881	7.03772	10.9855	0.183984	0.120336	30.6922	4.9398	up
ko04120	Ubiquitin mediated proteolysis	0.335977	MSTRG.33664	HHC051661	K06688	EC:2.3.2.23	probable ubiquitin-conjugating enzyme E2 C [Asparagus officinalis]	10.5543	9.39164	8.33971	12.1337	5.88713	3.44293	2.16608	1.11509	up
ko04120	Ubiquitin mediated proteolysis	0.335977	MSTRG.33702	HHC052506	K06689	EC:2.3.2.23	ubiquitin-conjugating enzyme E2 28 [Phoenix dactylifera]	29.3896	33.57	15.8096	8.59258	10.4121	9.15933	2.23187	1.15825	up
ko04120	Ubiquitin mediated proteolysis	0.335977	MSTRG.36052	HHC052147	K03350	NA	PREDICTED: uncharacterized protein LOC105048063 [Elaeis guineensis]	25.241	15.9915	6.67289	6.73868	4.71562	5.61198	2.64553	1.40356	up
ko04120	Ubiquitin mediated proteolysis	0.335977	MSTRG.8897	HHC006473	K03178	EC:6.2.1.45	ubiquitin-activating enzyme E1 1-like [Asparagus officinalis];uncharacterized protein A4U43_C08F34000 [Asparagus officinalis]	155.21	87.348	81.4433	69.4446	72.3358	20.7831	2.1126	1.07902	up
ko04120	Ubiquitin mediated proteolysis	0.335977	MSTRG.9767	HHC007947	K10577	NA	MOB kinase activator-like 1A [Asparagus officinalis]	21.31	17.0912	5.36832	5.91838	2.04988	1.93691	6.23157	2.6396	up
ko00785	Lipoic acid metabolism	0.341344	MSTRG.5465	HHC042531	K03644	EC:2.8.1.8	ferredoxin-thioredoxin reductase, variable chain-like [Phoenix dactylifera]	42.6493	45.8194	31.323	15.1768	14.9519	14.9812	2.2545	1.17281	up
ko00901	Indole alkaloid biosynthesis	0.361524	gene-HHC009329	HHC009329	K21026	EC:3.1.1.80	GDSL esterase/lipase At1g28570-like [Phoenix dactylifera]	0.660262	1.11312	0.790698	0.171181	0.0711432	0.199876	5.04625	2.33521	up
ko00901	Indole alkaloid biosynthesis	0.361524	gene-HHC017860	HHC017860	K01593	EC:4.1.1.28;EC:4.1.1.105	tyrosine/DOPA decarboxylase 1-like [Phoenix dactylifera]	1.3187	1.14596	0.135055	0.125317	0.0001	0.0562091	24.197	4.59676	up
ko00062	Fatty acid elongation	0.362918	MSTRG.16515	HHC017693	K10249	EC:2.3.1.199	elongation of fatty acids protein 3-like [Phoenix dactylifera]	12.007	4.7158	10.829	3.29063	3.65918	2.82945	2.37665	1.24893	up
ko00062	Fatty acid elongation	0.362918	MSTRG.19214	HHC021657	K15397	EC:2.3.1.199	uncharacterized protein A4U43_C08F6010 [Asparagus officinalis]	0.246528	1.88752	7.81876	16.7301	25.4895	24.8209	0.265182	-1.91494	down
ko00062	Fatty acid elongation	0.362918	MSTRG.33993	HHC053908	K01068	EC:3.1.2.2	uncharacterized protein LOC109825086 [Asparagus officinalis]	5.7147	4.71498	12.5505	23.9265	40.0588	36.684	0.30561	-1.71024	down
ko00130	Ubiquinone and other terpenoid-quinone biosynthesis	0.378595	MSTRG.23681	HHC028484	K00815	EC:2.6.1.5	nicotianamine aminotransferase A-like isoform X1 [Asparagus officinalis]	19.9789	9.28176	1.74716	2.90574	2.73313	2.03488	3.55637	1.83041	up
ko00130	Ubiquinone and other terpenoid-quinone biosynthesis	0.378595	MSTRG.31536	HHC040274	K03809	EC:1.6.5.2	PREDICTED: probable NAD(P)H dehydrogenase (quinone) FQR1-like 1 [Gossypium hirsutum]	3.14032	1.506	0.465039	0.595488	0.451587	0.430903	3.23338	1.69304	up
ko00130	Ubiquinone and other terpenoid-quinone biosynthesis	0.378595	MSTRG.34917	HHC053429	K01661	EC:4.1.3.36	1,4-dihydroxy-2-naphthoyl-CoA synthase, peroxisomal-like [Phoenix dactylifera]	126.644	93.8362	160.824	72.0535	8.98654	75.8406	2.67225	1.41805	up
ko00130	Ubiquinone and other terpenoid-quinone biosynthesis	0.378595	MSTRG.8437	HHC046989	K00815	EC:2.6.1.5	uncharacterized protein LOC110102404 isoform X1 [Dendrobium catenatum]	29.4044	7.40646	17.0067	3.35214	2.23206	2.49231	6.05051	2.59706	up
ko00590	Arachidonic acid metabolism	0.431741	MSTRG.12506	HHC012021	K18592	EC:2.3.2.2;EC:3.4.19.13	glutathione hydrolase 1-like isoform X1 [Ziziphus jujuba]	2.89181	42.5227	2.69095	3.29626	2.96713	3.32367	4.08547	2.0305	up
ko00590	Arachidonic acid metabolism	0.431741	MSTRG.14291	HHC014792	K18592	EC:2.3.2.2;EC:3.4.19.13	gamma-glutamyl transpeptidase [Allium sativum];gamma-glutamyltranspeptidase 3-like isoform X1 [Asparagus officinalis]	11.9336	13.9216	7.97381	3.36161	2.70338	3.22449	3.13693	1.64935	up
ko00590	Arachidonic acid metabolism	0.431741	MSTRG.15951	HHC016926	K18592	EC:2.3.2.2;EC:3.4.19.13	hypothetical protein GW17_00024033 [Ensete ventricosum]	0.719399	1.02684	0.531168	4.25082	6.36626	5.41374	0.27709	-1.85158	down
ko00590	Arachidonic acid metabolism	0.431741	MSTRG.32789	HHC047619	K18592	EC:2.3.2.2;EC:3.4.19.13	gamma-glutamyl transpeptidase [Allium sativum]	27.0159	21.8248	10.9167	7.82066	6.55092	5.12675	2.89348	1.5328	up
ko00906	Carotenoid biosynthesis	0.451378	gene-HHC011889	HHC011889	K09838	EC:1.14.15.21	uncharacterized protein A4U43_C06F5410 [Asparagus officinalis]	3.87342	2.08861	0.0001	0.531733	0.0001	0.0553152	58.5928	5.87265	up
ko00906	Carotenoid biosynthesis	0.451378	MSTRG.1033	HHC001277	K14595;K22771	EC:2.4.1.263;EC:2.4.1.-	scopoletin glucosyltransferase-like [Asparagus officinalis]	7.52523	227.716	19.9133	9.62393	14.3808	11.0198	5.21207	2.38186	up
ko00906	Carotenoid biosynthesis	0.451378	MSTRG.1664	HHC002127	K09842	EC:1.2.3.14	LOW QUALITY PROTEIN: indole-3-acetaldehyde oxidase-like [Asparagus officinalis]	18.3201	3.99289	0.933457	0.522835	1.06372	0.500196	7.59927	2.92586	up
ko00906	Carotenoid biosynthesis	0.451378	MSTRG.22161	HHC026065	K09840	EC:1.13.11.51	carotenoid cleavage dioxygenase [Crocus ancyrensis]	224.948	50.0841	87.9963	49.7681	44.7821	38.1809	2.48783	1.31489	up
ko00900	Terpenoid backbone biosynthesis	0.451378	MSTRG.15270	HHC016034	K11778	EC:2.5.1.87	dehydrodolichyl diphosphate synthase 6-like [Asparagus officinalis]	0.00443718	4.73735	0.032508	7.05784	0.0584139	0.0495681	54.7875	5.77578	up
ko00900	Terpenoid backbone biosynthesis	0.451378	MSTRG.22298	HHC026387	K01823	EC:5.3.3.2	isopentenyl-diphosphate Delta-isomerase I [Sesamum indicum]	2.82744	2.22802	2.63926	12.3378	12.4818	13.4825	0.385772	-1.37418	down
ko00900	Terpenoid backbone biosynthesis	0.451378	MSTRG.34949	HHC053283	K05356	EC:2.5.1.84;EC:2.5.1.85	probable solanesyl-diphosphate synthase 3, chloroplastic [Asparagus officinalis]	69.7128	31.7783	27.5783	17.5208	17.5281	18.044	2.06046	1.04297	up
ko00900	Terpenoid backbone biosynthesis	0.451378	MSTRG.36099	HHC047511	K00787	EC:2.5.1.1;EC:2.5.1.10	farnesyl diphosphate synthase [Asparagus officinalis]	80.7727	58.7969	23.4747	13.0839	13.8416	9.38002	3.79233	1.92309	up
ko00190	Oxidative phosphorylation	0.478027	MSTRG.13343	HHC013482	K00417	NA	cytochrome b-c1 complex subunit 7-2 [Asparagus officinalis];cytochrome b-c1 complex subunit 7-2-like [Asparagus officinalis]	11.5243	2.94005	1.8153	0.9217	1.52823	1.11188	3.2577	1.70385	up
ko00190	Oxidative phosphorylation	0.478027	MSTRG.14209	HHC014677	K02109	NA	ATP synthase CF0 subunit I (chloroplast) [Anemarrhena asphodeloides]	12.7751	0.41871	0.3965	0.597432	0.432373	0.681303	6.36976	2.67124	up
ko00190	Oxidative phosphorylation	0.478027	MSTRG.1782	HHC002317	K02113	NA	PREDICTED: ATP synthase subunit delta, chloroplastic-like [Musa acuminata subsp. malaccensis]	1414.88	1293.38	1145.74	460.775	467.277	465.335	2.31327	1.20994	up
ko00190	Oxidative phosphorylation	0.478027	MSTRG.19329	HHC021812	K02109	NA	ATP synthase subunit b', chloroplastic [Phoenix dactylifera]	140.059	152.099	127.827	57.2541	56.7245	55.5274	2.12575	1.08797	up
ko00190	Oxidative phosphorylation	0.478027	MSTRG.20088	HHC022855	K02154	NA	V-type proton ATPase subunit a1 [Asparagus officinalis]	2.28847	3.08692	3.68787	7.63441	9.81121	8.21506	0.463148	-1.11045	down
ko00190	Oxidative phosphorylation	0.478027	MSTRG.25721	HHC031502	K02113	NA	ATP synthase subunit delta, chloroplastic [Ananas comosus]	46.2239	26.911	60.3547	14.4762	18.1551	14.6731	2.25364	1.17226	up
ko00190	Oxidative phosphorylation	0.478027	MSTRG.27415	HHC034352	K03949	NA	probable NADH dehydrogenase [ubiquinone] 1 alpha subcomplex subunit 5, mitochondrial [Asparagus officinalis]	104.534	71.8115	62.6131	37.9874	28.2293	37.471	2.10764	1.07563	up
ko00190	Oxidative phosphorylation	0.478027	MSTRG.28553	HHC035995	K02151	NA	V-type proton ATPase subunit F-like [Prunus avium]	45.2814	31.9232	38.9674	17.6628	13.2556	18.9864	2.07547	1.05344	up
ko00190	Oxidative phosphorylation	0.478027	MSTRG.32215	HHC047773	K01507	EC:3.6.1.1	PREDICTED: soluble inorganic pyrophosphatase [Elaeis guineensis]	77.9734	98.8583	59.2648	64.6513	25.5052	23.3206	3.07981	1.62284	up
ko00190	Oxidative phosphorylation	0.478027	MSTRG.33564	HHC051352	K02109	NA	ATP synthase subunit b', chloroplastic [Phoenix dactylifera]	505.889	463.967	532.358	181.349	170.842	169.671	2.4721	1.30574	up
ko00190	Oxidative phosphorylation	0.478027	MSTRG.6603	HHC044069	K03937	NA	NADH dehydrogenase [ubiquinone] iron-sulfur protein 4, mitochondrial-like [Asparagus officinalis]	29.7283	31.4311	24.943	16.1473	7.48514	14.2636	2.3507	1.23309	up
ko00190	Oxidative phosphorylation	0.478027	MSTRG.7339	HHC044984	K03941	EC:1.6.5.3;EC:1.6.99.3	hypothetical protein EUGRSUZ_I00724 [Eucalyptus grandis]	27.8865	19.1376	22.5635	11.5323	7.39148	8.21107	2.59957	1.37828	up
ko00190	Oxidative phosphorylation	0.478027	MSTRG.9307	HHC007030	K05579	EC:1.6.5.3	putative ribosomal protein S15 [Helianthus annuus]	18.9887	0.674075	0.377414	1.75022	0.162893	0.901496	10.2361	3.3556	up
ko00190	Oxidative phosphorylation	0.478027	MSTRG.972	HHC001189	K02108	NA	ATP synthase subunit a, chloroplastic [Triticum urartu]	59.6918	5.17368	6.82411	4.82922	4.60486	4.58509	4.16318	2.05769	up
ko00940	Phenylpropanoid biosynthesis	0.479945	MSTRG.15623	HHC016509	K09755	EC:1.14.-.-	cytochrome P450 84A1-like [Phoenix dactylifera]	106.604	16.2498	7.78443	0.581226	0.509467	0.539872	62.5248	5.96636	up
ko00940	Phenylpropanoid biosynthesis	0.479945	MSTRG.16551	HHC017742	K06892	EC:1.14.11.-	protein DMR6-LIKE OXYGENASE 2-like [Phoenix dactylifera]	66.1192	301.017	489.127	92.6439	98.1431	88.1957	2.54619	1.34834	up
ko00940	Phenylpropanoid biosynthesis	0.479945	MSTRG.16556	HHC017745	K06892	EC:1.14.11.-	protein DMR6-LIKE OXYGENASE 2-like [Asparagus officinalis]	5.50224	32.9186	29.26	3.11729	3.02266	3.43049	5.48555	2.45564	up
ko00940	Phenylpropanoid biosynthesis	0.479945	MSTRG.17759	HHC019457	K01188	EC:3.2.1.21	beta-glucosidase 31-like isoform X1 [Asparagus officinalis]	51.8504	28.3881	23.8236	13.9352	12.5498	14.593	2.17363	1.12011	up
ko00940	Phenylpropanoid biosynthesis	0.479945	MSTRG.19644	HHC022259	K06892	EC:1.14.11.-	protein DMR6-LIKE OXYGENASE 2 [Ananas comosus]	10.739	87.7081	172.541	7.70592	5.87204	5.99794	11.7394	3.55329	up
ko00940	Phenylpropanoid biosynthesis	0.479945	MSTRG.21983	HHC025751	K00430	EC:1.11.1.7	peroxidase 17 [Ananas comosus]	54.086	49.2171	13.1059	6.92593	8.61643	9.8236	3.34422	1.74167	up
ko00940	Phenylpropanoid biosynthesis	0.479945	MSTRG.31163	HHC039783	K00430	EC:1.11.1.7	peroxidase 17 [Ananas comosus]	56.1197	32.1182	3.91817	2.74726	3.38066	2.17835	8.53598	3.09356	up
ko00940	Phenylpropanoid biosynthesis	0.479945	MSTRG.32957	HHC049871	K09753	EC:1.2.1.44	cinnamoyl-CoA reductase 1-like isoform X1 [Asparagus officinalis]	51.061	26.5059	31.5321	15.9931	15.7914	12.503	2.21054	1.1444	up
ko00940	Phenylpropanoid biosynthesis	0.479945	MSTRG.33093	HHC049545	K09755	EC:1.14.-.-	cytochrome P450 84A1-like [Phoenix dactylifera]	569.596	100.912	63.6311	18.9072	13.6517	4.06526	21.2521	4.40953	up
ko00940	Phenylpropanoid biosynthesis	0.479945	MSTRG.33550	HHC053582	K00588	EC:2.1.1.104	PREDICTED: caffeoyl-CoA O-methyltransferase [Nelumbo nucifera];caffeoyl-CoA O-methyltransferase [Amborella trichopoda]	40.8055	41.279	23.6435	17.0126	13.2273	13.0112	2.33894	1.22585	up
ko00940	Phenylpropanoid biosynthesis	0.479945	MSTRG.8092	HHC046446	K05278;K06892	EC:1.14.20.6;EC:1.14.11.-	S-norcoclaurine synthase 1-like [Asparagus officinalis]	36.2176	16.5307	2.36395	2.29157	1.45883	1.64581	9.24484	3.20865	up
ko00940	Phenylpropanoid biosynthesis	0.479945	MSTRG.8392	HHC046922	K01188	EC:3.2.1.21	beta-glucosidase 12-like [Asparagus officinalis]	0.0001	320.613	17.2562	0.0001	0.0001	0.0001	844674	19.688	up
ko04146	Peroxisome	0.492636	MSTRG.15528	HHC016376	K03781	EC:1.11.1.6	catalase isozyme 1-like [Asparagus officinalis];catalase [Hypericum perforatum];catalase-1 [Ananas comosus]	822.044	259.211	282.024	153.191	159.006	154.935	2.41522	1.27215	up
ko04146	Peroxisome	0.492636	MSTRG.18866	HHC021167	K04565	EC:1.15.1.1	copper chaperone for superoxide dismutase, chloroplastic [Asparagus officinalis]	7.91849	3.28578	10.9218	3.39158	2.77787	3.01534	2.20237	1.13906	up
ko04146	Peroxisome	0.492636	MSTRG.20364	HHC023225	K01897	EC:6.2.1.3	long chain acyl-CoA synthetase 6, peroxisomal-like [Asparagus officinalis]	4.68007	9.27296	11.7326	12.8165	25.6963	20.3234	0.418322	-1.25731	down
ko04146	Peroxisome	0.492636	MSTRG.35640	HHC049103	K13346	NA	stress-response A/B barrel domain-containing protein UP3 [Phoenix dactylifera]	18.9876	20.8537	27.4728	9.61212	6.77605	6.10784	2.98536	1.57791	up
ko04146	Peroxisome	0.492636	MSTRG.5854	HHC043054	K13346	NA	stress-response A/B barrel domain-containing protein UP3 [Phoenix dactylifera]	9.48312	8.07693	6.45886	2.70804	3.41639	2.46551	2.27196	1.18394	up
ko04146	Peroxisome	0.492636	MSTRG.6090	HHC043385	K03781	EC:1.11.1.6	PREDICTED: catalase isozyme A [Musa acuminata subsp. malaccensis]	60.3265	30.1465	9.92071	7.24362	7.74981	5.59395	4.03325	2.01194	up
ko04146	Peroxisome	0.492636	MSTRG.7588	HHC045392	K12663	EC:5.3.3.21	PREDICTED: LOW QUALITY PROTEIN: delta(3,5)-Delta(2,4)-dienoyl-CoA isomerase, peroxisomal [Elaeis guineensis]	118.12	83.5949	62.5779	53.6508	8.15365	50.7025	2.70103	1.43351	up
ko04145	Phagosome	0.506153	gene-HHC045366	HHC045366	K00921	EC:2.7.1.150	1-phosphatidylinositol-3-phosphate 5-kinase FAB1A-like isoform X1 [Asparagus officinalis]	0.190037	0.0001	0.405825	4.04099	6.32693	7.49668	0.167719	-2.57589	down
ko04145	Phagosome	0.506153	MSTRG.10105	HHC008604	K08492	NA	PREDICTED: syntaxin-81 [Elaeis guineensis]	0.83729	0.859222	0.60395	0.750176	0.0001	0.0001	7626.59	12.8968	up
ko04145	Phagosome	0.506153	MSTRG.11677	HHC010939	K01365	EC:3.4.22.15	senescence-specific cysteine protease SAG39-like [Asparagus officinalis];uncharacterized protein A4U43_C01F30820 [Asparagus officinalis]	62.634	96.1777	26.7183	25.4244	25.7439	20.8312	2.26467	1.1793	up
ko04145	Phagosome	0.506153	MSTRG.20088	HHC022855	K02154	NA	V-type proton ATPase subunit a1 [Asparagus officinalis]	2.28847	3.08692	3.68787	7.63441	9.81121	8.21506	0.463148	-1.11045	down
ko04145	Phagosome	0.506153	MSTRG.20169	HHC022969	K01365	EC:3.4.22.15	LOW QUALITY PROTEIN: oryzain alpha chain-like [Asparagus officinalis]	3.62408	4.94888	5.93257	12.8252	18.0085	17.0517	0.389769	-1.35931	down
ko04145	Phagosome	0.506153	MSTRG.28553	HHC035995	K02151	NA	V-type proton ATPase subunit F-like [Prunus avium]	45.2814	31.9232	38.9674	17.6628	13.2556	18.9864	2.07547	1.05344	up
ko04145	Phagosome	0.506153	MSTRG.34229	HHC049269	K08054	NA	calnexin homolog [Asparagus officinalis]	61.0103	57.3906	41.1985	65.5985	9.03935	42.9136	2.16732	1.11592	up
ko04145	Phagosome	0.506153	MSTRG.5740	HHC042886	K04392	NA	rac-like GTP-binding protein ARAC5 [Cinnamomum micranthum f. kanehirae]	14.2748	10.0428	16.2997	8.65286	6.6937	4.85884	2.13243	1.0925	up
ko00710	Carbon fixation in photosynthetic organisms	0.51723	MSTRG.10995	HHC009982	K00134	EC:1.2.1.12	glyceraldehyde-3-phosphate dehydrogenase 3, cytosolic [Asparagus officinalis]	921.762	731.91	510.982	250.496	264.228	264.175	2.28533	1.1924	up
ko00710	Carbon fixation in photosynthetic organisms	0.51723	MSTRG.18021	HHC019942	K01006	EC:2.7.9.1	pyruvate, phosphate dikinase 2 isoform X1 [Asparagus officinalis]	184.154	57.8913	22.7658	25.425	24.9436	24.3018	2.94683	1.55917	up
ko00710	Carbon fixation in photosynthetic organisms	0.51723	MSTRG.29909	HHC037958	K14272	EC:2.6.1.4;EC:2.6.1.2	uncharacterized protein A4U43_C03F11090 [Asparagus officinalis]	257.012	143.404	114.409	102.859	101.215	36.4626	2.24323	1.16557	up
ko00710	Carbon fixation in photosynthetic organisms	0.51723	MSTRG.30873	HHC039413	K00855	EC:2.7.1.19	PREDICTED: phosphoribulokinase, chloroplastic [Elaeis guineensis]	1980.58	1273.62	1550.16	645.359	645.17	666.77	2.07697	1.05448	up
ko00710	Carbon fixation in photosynthetic organisms	0.51723	MSTRG.34907	HHC051125	K01807	EC:5.3.1.6	probable ribose-5-phosphate isomerase 2 [Phoenix dactylifera]	70.7569	67.3868	110.489	32.2985	25.1993	26.2296	2.73126	1.44956	up
ko00710	Carbon fixation in photosynthetic organisms	0.51723	MSTRG.872	HHC001062	K01602	EC:4.1.1.39	ribulose bisphosphate carboxylase small chain, chloroplastic-like [Asparagus officinalis]	412.558	465.875	834.913	739.773	740.872	2272.66	0.407017	-1.29684	down
ko00620	Pyruvate metabolism	0.51723	MSTRG.1763	HHC002296	K00128	EC:1.2.1.3	LOW QUALITY PROTEIN: aldehyde dehydrogenase family 2 member B7, mitochondrial-like [Asparagus officinalis]	6.2678	3.97913	21.1137	1.83199	2.49058	2.38107	3.40671	1.76838	up
ko00620	Pyruvate metabolism	0.51723	MSTRG.18021	HHC019942	K01006	EC:2.7.9.1	pyruvate, phosphate dikinase 2 isoform X1 [Asparagus officinalis]	184.154	57.8913	22.7658	25.425	24.9436	24.3018	2.94683	1.55917	up
ko00620	Pyruvate metabolism	0.51723	MSTRG.18398	HHC020582	K00162	EC:1.2.4.1	pyruvate dehydrogenase E1 component subunit beta-1, mitochondrial [Quercus suber]	40.9418	33.1732	20.3804	11.7773	12.8854	12.2776	2.11169	1.0784	up
ko00620	Pyruvate metabolism	0.51723	MSTRG.28592	HHC036034	K00873	EC:2.7.1.40	pyruvate kinase, cytosolic isozyme [Asparagus officinalis]	27.4513	19.0294	8.57391	4.97046	4.61995	4.17644	3.41191	1.77058	up
ko00620	Pyruvate metabolism	0.51723	MSTRG.29960	HHC038045	K00128	EC:1.2.1.3	aldehyde dehydrogenase family 3 member F1-like [Asparagus officinalis]	11.5084	25.0615	15.9162	16.8047	48.3212	50.8613	0.34931	-1.51742	down
ko00620	Pyruvate metabolism	0.51723	MSTRG.31350	HHC040039	K00627	EC:2.3.1.12	dihydrolipoyllysine-residue acetyltransferase component 4 of pyruvate dehydrogenase complex, chloroplastic [Sesamum indicum]	9.28997	5.09968	7.16496	2.47162	2.53182	2.52062	2.37769	1.24956	up
ko02010	ABC transporters	0.522213	MSTRG.11991	HHC011387	K05681	NA	uncharacterized protein A4U43_C01F20830 [Asparagus officinalis]	16.0422	1.08878	0.0001	0.0001	0.0001	0.0001	42828.1	15.3863	up
ko02010	ABC transporters	0.522213	MSTRG.12100	HHC011490	K05681	NA	ABC transporter G family member 39-like [Asparagus officinalis]	62.113	4.48923	0.123816	0.19695	0.15908	0.0001	210.212	7.7157	up
ko02010	ABC transporters	0.522213	MSTRG.25692	HHC031431	K05658	EC:3.6.3.44	hypothetical protein CTI12_AA010480 [Artemisia annua]	4.83419	10.3005	13.2966	32.5704	35.8577	49.8459	0.355888	-1.49051	down
ko02010	ABC transporters	0.522213	MSTRG.26022	HHC032027	K05681	NA	ABC transporter G family member 42-like [Asparagus officinalis]	9.37601	5.7174	1.22648	3.52429	1.57623	1.25597	3.50332	1.80872	up
ko02010	ABC transporters	0.522213	MSTRG.536	HHC000582	K05681	NA	PREDICTED: ABC transporter G family member 42-like [Elaeis guineensis]	2.46681	0.878816	0.0963117	0.358906	0.0679142	0.201459	7.05497	2.81864	up
ko02010	ABC transporters	0.522213	MSTRG.545	HHC000587	K05681	NA	PREDICTED: ABC transporter G family member 42-like [Elaeis guineensis];ABC transporter G family member 42-like [Phoenix dactylifera]	5.24315	2.66313	0.600282	0.759583	0.427548	0.556494	4.70821	2.23518	up
ko00073	Cutin, suberine and wax biosynthesis	0.545784	gene-HHC009199	HHC009199	K15403	EC:1.1.-.-	protein HOTHEAD-like isoform X1 [Asparagus officinalis]	0.0001	0.287563	0.290506	0.699326	1.81392	1.35816	0.201366	-2.31211	down
ko00073	Cutin, suberine and wax biosynthesis	0.545784	MSTRG.16874	HHC018188	K13407;K20769	EC:1.14.-.-	PREDICTED: cytochrome P450 94A1 [Elaeis guineensis]	35.8125	25.4711	27.2093	13.13	12.9413	6.43376	2.62252	1.39095	up
ko00073	Cutin, suberine and wax biosynthesis	0.545784	MSTRG.24471	HHC029530	K15400	EC:2.3.1.188	LOW QUALITY PROTEIN: omega-hydroxypalmitate O-feruloyl transferase-like [Asparagus officinalis]	33.2298	46.499	50.7952	93.2889	3.99398	2.95185	16.1113	4.01	up
ko00400	Phenylalanine, tyrosine and tryptophan biosynthesis	0.5575	gene-HHC022321	HHC022321	K01850	EC:5.4.99.5	chorismate mutase 1, chloroplastic-like [Asparagus officinalis]	0.972855	0.893872	0.130085	0.0001	0.0001	0.0001	4992.28	12.2855	up
ko00400	Phenylalanine, tyrosine and tryptophan biosynthesis	0.5575	MSTRG.12317	HHC011769	K05359	EC:4.2.1.91;EC:4.2.1.51	arogenate dehydratase/prephenate dehydratase 6, chloroplastic-like [Dendrobium catenatum]	0.736723	0.599646	0.459508	0.115173	0.0866106	0.101201	5.08768	2.34701	up
ko00400	Phenylalanine, tyrosine and tryptophan biosynthesis	0.5575	MSTRG.23681	HHC028484	K00815	EC:2.6.1.5	nicotianamine aminotransferase A-like isoform X1 [Asparagus officinalis]	19.9789	9.28176	1.74716	2.90574	2.73313	2.03488	3.55637	1.83041	up
ko00400	Phenylalanine, tyrosine and tryptophan biosynthesis	0.5575	MSTRG.8437	HHC046989	K00815	EC:2.6.1.5	uncharacterized protein LOC110102404 isoform X1 [Dendrobium catenatum]	29.4044	7.40646	17.0067	3.35214	2.23206	2.49231	6.05051	2.59706	up
ko00280	Valine, leucine and isoleucine degradation	0.563402	MSTRG.1763	HHC002296	K00128	EC:1.2.1.3	LOW QUALITY PROTEIN: aldehyde dehydrogenase family 2 member B7, mitochondrial-like [Asparagus officinalis]	6.2678	3.97913	21.1137	1.83199	2.49058	2.38107	3.40671	1.76838	up
ko00280	Valine, leucine and isoleucine degradation	0.563402	MSTRG.2697	HHC003720	K00827	EC:2.6.1.44;EC:2.6.1.40	alanine--glyoxylate aminotransferase 2 homolog 3, mitochondrial-like [Asparagus officinalis]	0.274572	1.28901	1.8126	0.0001	0.0001	0.0001	8440.72	13.0432	up
ko00280	Valine, leucine and isoleucine degradation	0.563402	MSTRG.29960	HHC038045	K00128	EC:1.2.1.3	aldehyde dehydrogenase family 3 member F1-like [Asparagus officinalis]	11.5084	25.0615	15.9162	16.8047	48.3212	50.8613	0.34931	-1.51742	down
ko00280	Valine, leucine and isoleucine degradation	0.563402	MSTRG.36021	HHC053662	K00826	EC:2.6.1.42	branched-chain-amino-acid aminotransferase 5, chloroplastic-like isoform X2 [Asparagus officinalis]	22.3662	3.95389	0.0001	0.0001	0.0001	0.0001	65800.6	16.0058	up
ko03050	Proteasome	0.582673	MSTRG.12904	HHC012768	K02730	EC:3.4.25.1	proteasome subunit alpha type-6 [Asparagus officinalis]	191.324	140.769	110.55	63.9411	62.7736	55.9975	2.13261	1.09262	up
ko03050	Proteasome	0.582673	MSTRG.19993	HHC022738	K03033	NA	26S proteasome non-ATPase regulatory subunit 3 like [Actinidia chinensis var. chinensis]	39.0339	29.6809	23.0054	19.1482	7.70089	2.47189	5.44927	2.44606	up
ko03050	Proteasome	0.582673	MSTRG.28202	HHC035503	K02731	EC:3.4.25.1	proteasome subunit alpha type-7-like isoform X3 [Durio zibethinus]	102.344	49.3661	44.5952	10.6579	14.2652	15.6996	3.45344	1.78803	up
ko03050	Proteasome	0.582673	MSTRG.3089	HHC004364	K02726	EC:3.4.25.1	PREDICTED: proteasome subunit alpha type-2-A [Elaeis guineensis]	19.6832	11.6342	14.7236	4.16031	2.90744	5.84004	2.86947	1.52079	up
ko03050	Proteasome	0.582673	MSTRG.3941	HHC005833	K03063	NA	root phototropism protein 2 [Asparagus officinalis]	112.606	38.7241	42.7846	24.0231	29.868	20.6117	2.16065	1.11147	up
ko00910	Nitrogen metabolism	0.58664	MSTRG.1224	HHC001538	K01673	EC:4.2.1.1	carbonic anhydrase 2-like isoform X1 [Asparagus officinalis]	8693.34	11153.1	3004.48	1928.91	2343.08	2412.05	2.60559	1.38161	up
ko00910	Nitrogen metabolism	0.58664	MSTRG.13001	HHC012943	K01915	EC:6.3.1.2	glutamine synthetase cytosolic isozyme 1 [Asparagus officinalis];PREDICTED: glutamine synthetase nodule isozyme [Fragaria vesca subsp. vesca]	554.684	539.795	351.762	478.585	236.671	236.545	2.03377	1.02416	up
ko00910	Nitrogen metabolism	0.58664	MSTRG.19440	HHC021949	K00261	EC:1.4.1.3	glutamate dehydrogenase 1, mitochondrial [Asparagus officinalis]	182.674	495.758	24.5639	80.2749	30.4986	28.6154	6.62509	2.72794	up
ko00905	Brassinosteroid biosynthesis	0.589805	MSTRG.1944	HHC002550	K12639	EC:1.14.13.-	LOW QUALITY PROTEIN: cytochrome P450 724B1-like [Asparagus officinalis]	32.5463	46.2637	1.78198	2.88196	3.71561	3.37614	5.88528	2.55711	up
ko00905	Brassinosteroid biosynthesis	0.589805	MSTRG.8128	HHC046497	K09587	EC:1.14.13.-	PREDICTED: cytochrome P450 90B1-like [Elaeis guineensis]	8.1248	1.85597	0.336458	0.0001	0.0001	0.0001	25793.3	14.6547	up
ko00740	Riboflavin metabolism	0.589805	gene-HHC029775	HHC029775	K20884	EC:2.7.1.26;EC:3.1.3.102	PREDICTED: bifunctional riboflavin kinase/FMN phosphatase [Elaeis guineensis]	2.53575	6.18783	0.86676	0.406488	0.521834	0.0001	9.57673	3.25953	up
ko00740	Riboflavin metabolism	0.589805	MSTRG.13771	HHC014062	K20884	EC:2.7.1.26;EC:3.1.3.102	PREDICTED: bifunctional riboflavin kinase/FMN phosphatase [Elaeis guineensis];uncharacterized protein A4U43_C05F18390 [Asparagus officinalis]	18.7712	20.6507	3.10118	3.30805	2.333	2.54258	4.70008	2.23269	up
ko00965	Betalain biosynthesis	0.615188	gene-HHC017860	HHC017860	K01593	EC:4.1.1.28;EC:4.1.1.105	tyrosine/DOPA decarboxylase 1-like [Phoenix dactylifera]	1.3187	1.14596	0.135055	0.125317	0.0001	0.0562091	24.197	4.59676	up
ko00730	Thiamine metabolism	0.626515	MSTRG.26603	HHC032949	K03146	EC:2.4.2.60	PREDICTED: thiamine thiazole synthase, chloroplastic [Elaeis guineensis]	1913.65	972.804	1331.14	460.973	435.466	432.097	2.69639	1.43103	up
ko00010	Glycolysis / Gluconeogenesis	0.629648	MSTRG.10995	HHC009982	K00134	EC:1.2.1.12	glyceraldehyde-3-phosphate dehydrogenase 3, cytosolic [Asparagus officinalis]	921.762	731.91	510.982	250.496	264.228	264.175	2.28533	1.1924	up
ko00010	Glycolysis / Gluconeogenesis	0.629648	MSTRG.17225	HHC018652	K00895	EC:2.7.1.90	pyrophosphate--fructose 6-phosphate 1-phosphotransferase subunit alpha-like isoform X3 [Asparagus officinalis]	8.67272	5.93313	10.7158	3.61827	2.6715	3.79934	2.23618	1.16104	up
ko00010	Glycolysis / Gluconeogenesis	0.629648	MSTRG.1763	HHC002296	K00128	EC:1.2.1.3	LOW QUALITY PROTEIN: aldehyde dehydrogenase family 2 member B7, mitochondrial-like [Asparagus officinalis]	6.2678	3.97913	21.1137	1.83199	2.49058	2.38107	3.40671	1.76838	up
ko00010	Glycolysis / Gluconeogenesis	0.629648	MSTRG.18398	HHC020582	K00162	EC:1.2.4.1	pyruvate dehydrogenase E1 component subunit beta-1, mitochondrial [Quercus suber]	40.9418	33.1732	20.3804	11.7773	12.8854	12.2776	2.11169	1.0784	up
ko00010	Glycolysis / Gluconeogenesis	0.629648	MSTRG.2759	HHC003829	K01568	EC:4.1.1.1	PREDICTED: pyruvate decarboxylase 1 [Elaeis guineensis]	274.616	179.796	93.7278	86.821	79.6145	64.3112	2.20586	1.14134	up
ko00010	Glycolysis / Gluconeogenesis	0.629648	MSTRG.28592	HHC036034	K00873	EC:2.7.1.40	pyruvate kinase, cytosolic isozyme [Asparagus officinalis]	27.4513	19.0294	8.57391	4.97046	4.61995	4.17644	3.41191	1.77058	up
ko00010	Glycolysis / Gluconeogenesis	0.629648	MSTRG.29960	HHC038045	K00128	EC:1.2.1.3	aldehyde dehydrogenase family 3 member F1-like [Asparagus officinalis]	11.5084	25.0615	15.9162	16.8047	48.3212	50.8613	0.34931	-1.51742	down
ko00010	Glycolysis / Gluconeogenesis	0.629648	MSTRG.31350	HHC040039	K00627	EC:2.3.1.12	dihydrolipoyllysine-residue acetyltransferase component 4 of pyruvate dehydrogenase complex, chloroplastic [Sesamum indicum]	9.28997	5.09968	7.16496	2.47162	2.53182	2.52062	2.37769	1.24956	up
ko00010	Glycolysis / Gluconeogenesis	0.629648	MSTRG.33635	HHC051480	K01810	EC:5.3.1.9	protein OSB2, chloroplastic-like [Asparagus officinalis]	11.0075	4.05807	2.10628	0.874752	1.10763	0.981011	4.32017	2.11109	up
ko00330	Arginine and proline metabolism	0.64335	MSTRG.1763	HHC002296	K00128	EC:1.2.1.3	LOW QUALITY PROTEIN: aldehyde dehydrogenase family 2 member B7, mitochondrial-like [Asparagus officinalis]	6.2678	3.97913	21.1137	1.83199	2.49058	2.38107	3.40671	1.76838	up
ko00330	Arginine and proline metabolism	0.64335	MSTRG.29960	HHC038045	K00128	EC:1.2.1.3	aldehyde dehydrogenase family 3 member F1-like [Asparagus officinalis]	11.5084	25.0615	15.9162	16.8047	48.3212	50.8613	0.34931	-1.51742	down
ko00330	Arginine and proline metabolism	0.64335	MSTRG.4488	HHC040913	K00819	EC:2.6.1.13	ornithine aminotransferase, mitochondrial [Asparagus officinalis];PREDICTED: ornithine aminotransferase, mitochondrial isoform X1 [Elaeis guineensis]	72.147	63.9322	68.8296	39.1014	25.6723	28.0743	2.27001	1.1827	up
ko03450	Non-homologous end-joining	0.648181	MSTRG.14707	HHC015362	K10885	NA	ATP-dependent DNA helicase 2 subunit KU80 isoform X1 [Asparagus officinalis]	0.0001	0.611666	0.0001	0.50582	0.0001	0.0001	2794.21	11.4482	up
ko00261	Monobactam biosynthesis	0.658539	MSTRG.15026	HHC015774	K13811	EC:2.7.7.4;EC:2.7.1.25	ATP-sulfurylase [Allium cepa]	5.38357	44.5817	90.2161	11.4356	12.6451	11.9036	3.08809	1.62672	up
ko00520	Amino sugar and nucleotide sugar metabolism	0.691501	gene-HHC027615	HHC027615	K12449	NA	UDP-D-apiose/UDP-D-xylose synthase [Ornithogalum longebracteatum]	0.0001	0.164155	0.0001	0.226556	0.647991	0.890514	0.127043	-2.97662	down
ko00520	Amino sugar and nucleotide sugar metabolism	0.691501	MSTRG.11056	HHC010065	K01183	EC:3.2.1.14	PREDICTED: endochitinase PR4-like [Nelumbo nucifera]	39.1825	14.9406	6.10728	4.60782	3.96187	5.25431	3.51763	1.8146	up
ko00520	Amino sugar and nucleotide sugar metabolism	0.691501	MSTRG.11621	HHC010844	K01809	EC:5.3.1.8	PREDICTED: mannose-6-phosphate isomerase 2 [Elaeis guineensis]	13.5901	14.4324	1.54676	3.47546	3.28449	2.53699	2.83817	1.50496	up
ko00520	Amino sugar and nucleotide sugar metabolism	0.691501	MSTRG.16236	HHC017302	K01183	EC:3.2.1.14	PREDICTED: acidic mammalian chitinase-like [Elaeis guineensis]	58.7703	33.0426	17.914	9.57306	10.2064	10.6745	2.85667	1.51434	up
ko00520	Amino sugar and nucleotide sugar metabolism	0.691501	MSTRG.18856	HHC021157	K12451	EC:5.1.3.-;EC:1.1.1.-	UER1 protein [Ornithogalum longebracteatum]	102.251	45.9078	31.9554	18.0388	24.0123	16.0322	2.47415	1.30693	up
ko00520	Amino sugar and nucleotide sugar metabolism	0.691501	MSTRG.25071	HHC030373	K00975	EC:2.7.7.27	glucose-1-phosphate adenylyltransferase small subunit, chloroplastic/amyloplastic [Asparagus officinalis]	113.468	128.171	72.4958	17.0292	19.0713	18.5471	4.40164	2.13804	up
ko00520	Amino sugar and nucleotide sugar metabolism	0.691501	MSTRG.33635	HHC051480	K01810	EC:5.3.1.9	protein OSB2, chloroplastic-like [Asparagus officinalis]	11.0075	4.05807	2.10628	0.874752	1.10763	0.981011	4.32017	2.11109	up
ko00520	Amino sugar and nucleotide sugar metabolism	0.691501	MSTRG.3842	HHC005704	K00847	EC:2.7.1.4	universal stress protein PHOS32 isoform X2 [Phoenix dactylifera]	239.102	257.875	119.337	95.9595	88.7733	84.9238	2.05033	1.03586	up
ko00520	Amino sugar and nucleotide sugar metabolism	0.691501	MSTRG.5275	HHC042252	K01183	EC:3.2.1.14	PREDICTED: chitotriosidase-1-like [Daucus carota subsp. sativus];hypothetical protein CKAN_02024300 [Cinnamomum micranthum f. kanehirae]	98.8822	79.8666	69.064	31.3209	35.9093	30.1528	2.11266	1.07906	up
ko04070	Phosphatidylinositol signaling system	0.715218	gene-HHC045366	HHC045366	K00921	EC:2.7.1.150	1-phosphatidylinositol-3-phosphate 5-kinase FAB1A-like isoform X1 [Asparagus officinalis]	0.190037	0.0001	0.405825	4.04099	6.32693	7.49668	0.167719	-2.57589	down
ko04070	Phosphatidylinositol signaling system	0.715218	MSTRG.10742	HHC009612	K02183	NA	probable calcium-binding protein CML29 [Phoenix dactylifera]	986.082	726.029	120.407	152.896	150.619	150.64	3.29519	1.72036	up
ko04070	Phosphatidylinositol signaling system	0.715218	MSTRG.17861	HHC019660	K01092	EC:3.1.3.25	protein CURVATURE THYLAKOID 1B, chloroplastic-like [Asparagus officinalis]	1713.93	1330.69	843.491	540.284	499.746	486.815	2.24436	1.1663	up
ko04070	Phosphatidylinositol signaling system	0.715218	MSTRG.24644	HHC029749	K01092	EC:3.1.3.25	protein CURVATURE THYLAKOID 1C, chloroplastic isoform X2 [Asparagus officinalis]	14.7179	12.5221	11.9691	11.3177	44.8045	48.4683	0.270855	-1.88441	down
ko04070	Phosphatidylinositol signaling system	0.715218	MSTRG.26122	HHC032212	K18081	EC:3.1.3.64;EC:3.1.3.95	PREDICTED: heavy metal-associated isoprenylated plant protein 28 [Elaeis guineensis]	5.81276	2.8742	0.0001	0.0001	0.0001	0.0001	21717.9	14.4066	up
ko04070	Phosphatidylinositol signaling system	0.715218	MSTRG.30984	HHC039560	K02183	NA	putative calcium-binding protein [Ananas comosus]	1.40948	2.15779	36.0714	2.03777	0.678592	1.2214	10.9675	3.45516	up
ko00604	Glycosphingolipid biosynthesis - ganglio series	0.72347	MSTRG.8136	HHC046508	K12309	EC:3.2.1.23	beta-galactosidase isoform X2 [Asparagus officinalis]	635.079	323.323	31.8215	60.1851	70.0557	50.2006	4.36737	2.12677	up
ko00604	Glycosphingolipid biosynthesis - ganglio series	0.72347	MSTRG.9579	HHC007524	K12309	EC:3.2.1.23	protein indeterminate-domain-containing protein [Cinnamomum micranthum f. kanehirae];protein indeterminate-domain 5, chloroplastic-like [Papaver somniferum]	13.7067	4.12411	8.69732	15.0544	2.23838	1.99841	4.90732	2.29493	up
ko00051	Fructose and mannose metabolism	0.727569	MSTRG.11298	HHC010423	K19355	EC:3.2.1.78	PREDICTED: mannan endo-1,4-beta-mannosidase 7-like [Nelumbo nucifera];Mannan endo-1,4-beta-mannosidase 1 [Dendrobium catenatum]	0.152623	0.110035	0.251175	0.440626	1.58193	1.79758	0.141213	-2.82406	down
ko00051	Fructose and mannose metabolism	0.727569	MSTRG.11621	HHC010844	K01809	EC:5.3.1.8	PREDICTED: mannose-6-phosphate isomerase 2 [Elaeis guineensis]	13.5901	14.4324	1.54676	3.47546	3.28449	2.53699	2.83817	1.50496	up
ko00051	Fructose and mannose metabolism	0.727569	MSTRG.17225	HHC018652	K00895	EC:2.7.1.90	pyrophosphate--fructose 6-phosphate 1-phosphotransferase subunit alpha-like isoform X3 [Asparagus officinalis]	8.67272	5.93313	10.7158	3.61827	2.6715	3.79934	2.23618	1.16104	up
ko00051	Fructose and mannose metabolism	0.727569	MSTRG.34756	HHC048506	K00008	EC:1.1.1.14	sorbitol dehydrogenase [Asparagus officinalis]	35.5841	27.8592	12.8445	15.2947	11.695	8.79363	2.23496	1.16025	up
ko00051	Fructose and mannose metabolism	0.727569	MSTRG.3842	HHC005704	K00847	EC:2.7.1.4	universal stress protein PHOS32 isoform X2 [Phoenix dactylifera]	239.102	257.875	119.337	95.9595	88.7733	84.9238	2.05033	1.03586	up
ko04626	Plant-pathogen interaction	0.728375	gene-HHC038830	HHC038830	K13466	NA	PREDICTED: uncharacterized protein LOC103983412 [Musa acuminata subsp. malaccensis]	2.50385	1.13516	1.01058	0.835696	0.526647	0.615676	2.40093	1.26359	up
ko04626	Plant-pathogen interaction	0.728375	MSTRG.10741	HHC009610	K13425	NA	transcription factor WRKYY2 [Narcissus hybrid cultivar]	25.5359	39.6923	15.7046	13.9286	11.5611	11.1931	2.08448	1.05969	up
ko04626	Plant-pathogen interaction	0.728375	MSTRG.10742	HHC009612	K02183	NA	probable calcium-binding protein CML29 [Phoenix dactylifera]	986.082	726.029	120.407	152.896	150.619	150.64	3.29519	1.72036	up
ko04626	Plant-pathogen interaction	0.728375	MSTRG.10840	HHC009755	K13413	EC:2.7.12.2	mitogen-activated protein kinase kinase 5-like [Phoenix dactylifera]	61.329	23.6953	25.4444	11.6879	16.0973	11.2886	2.23029	1.15723	up
ko04626	Plant-pathogen interaction	0.728375	MSTRG.1820	HHC002367	K13425	NA	transcription factor WRKYY2 [Narcissus hybrid cultivar]	6.9781	6.66321	1.29946	1.93954	1.43166	1.9486	2.49689	1.32013	up
ko04626	Plant-pathogen interaction	0.728375	MSTRG.20980	HHC024207	K13412	EC:2.7.11.1	calcium-dependent protein kinase 29-like [Asparagus officinalis]	29.7312	8.48071	5.39008	4.06659	4.15738	4.13247	2.87512	1.52362	up
ko04626	Plant-pathogen interaction	0.728375	MSTRG.21364	HHC024920	K13436	EC:2.7.11.1	probable protein kinase At2g41970 [Asparagus officinalis]	1.6367	3.75519	1.77154	4.65465	9.39844	11.3727	0.284483	-1.81359	down
ko04626	Plant-pathogen interaction	0.728375	MSTRG.21782	HHC025427	K13448	NA	probable calcium-binding protein CML18 [Phoenix dactylifera]	15.1333	11.4422	37.1727	3.85531	4.55284	4.2684	3.83186	1.93804	up
ko04626	Plant-pathogen interaction	0.728375	MSTRG.26083	HHC032127	K18880	EC:5.3.3.8	PREDICTED: enoyl-CoA delta isomerase 2, peroxisomal-like [Musa acuminata subsp. malaccensis]	25.1605	16.9351	14.6061	8.76252	6.87543	6.53399	2.44098	1.28746	up
ko04626	Plant-pathogen interaction	0.728375	MSTRG.2708	HHC003738	K13424	NA	WRKY transcription factor WRKY24-like [Phoenix dactylifera];PREDICTED: WRKY transcription factor WRKY24 [Elaeis guineensis]	122.093	49.0945	39.8822	16.9968	21.0984	22.0926	2.64021	1.40065	up
ko04626	Plant-pathogen interaction	0.728375	MSTRG.30984	HHC039560	K02183	NA	putative calcium-binding protein [Ananas comosus]	1.40948	2.15779	36.0714	2.03777	0.678592	1.2214	10.9675	3.45516	up
ko04626	Plant-pathogen interaction	0.728375	MSTRG.3101	HHC004397	K04079	NA	PREDICTED: uncharacterized protein LOC103995568 isoform X3 [Musa acuminata subsp. malaccensis]	3.09398	2.51154	0.202771	0.0001	0.0291534	0.0001	99.2773	6.63339	up
ko04626	Plant-pathogen interaction	0.728375	MSTRG.32270	HHC048448	K18880	EC:5.3.3.8	PREDICTED: enoyl-CoA delta isomerase 1, peroxisomal [Musa acuminata subsp. malaccensis]	6.92841	6.28326	5.92927	3.00651	2.53169	2.30185	2.29102	1.19599	up
ko04626	Plant-pathogen interaction	0.728375	MSTRG.32917	HHC050085	K13425	NA	transcription factor WRKYJ2, partial [Narcissus hybrid cultivar]	14.8117	12.0288	22.5768	6.08494	2.50258	4.58656	3.91459	1.96886	up
ko04626	Plant-pathogen interaction	0.728375	MSTRG.333	HHC000377	K13424	NA	probable WRKY transcription factor 72 isoform X1 [Phoenix dactylifera]	8.62914	2.6092	0.639535	0.977402	0.846301	0.669915	4.23926	2.08381	up
ko04626	Plant-pathogen interaction	0.728375	MSTRG.8974	HHC006579	K13434	NA	pathogenesis-related genes transcriptional activator PTI6-like [Phoenix dactylifera]	10.6932	3.91007	3.4467	1.11036	1.01547	1.64254	3.60427	1.84971	up
ko04626	Plant-pathogen interaction	0.728375	MSTRG.9977	HHC008406	K13424	NA	WRKY transcription factor WRKY24-like [Phoenix dactylifera]	142.67	49.0503	55.4499	30.1993	26.7182	29.7004	2.45814	1.29757	up
ko00310	Lysine degradation	0.729368	MSTRG.1763	HHC002296	K00128	EC:1.2.1.3	LOW QUALITY PROTEIN: aldehyde dehydrogenase family 2 member B7, mitochondrial-like [Asparagus officinalis]	6.2678	3.97913	21.1137	1.83199	2.49058	2.38107	3.40671	1.76838	up
ko00310	Lysine degradation	0.729368	MSTRG.29960	HHC038045	K00128	EC:1.2.1.3	aldehyde dehydrogenase family 3 member F1-like [Asparagus officinalis]	11.5084	25.0615	15.9162	16.8047	48.3212	50.8613	0.34931	-1.51742	down
ko00770	Pantothenate and CoA biosynthesis	0.729368	MSTRG.31064	HHC039663	K01922	EC:6.3.2.51	phosphopantothenate--cysteine ligase 1-like [Asparagus officinalis]	35.5919	51.2313	21.4444	17.1271	16.3737	14.7252	2.01606	1.01154	up
ko00770	Pantothenate and CoA biosynthesis	0.729368	MSTRG.36021	HHC053662	K00826	EC:2.6.1.42	branched-chain-amino-acid aminotransferase 5, chloroplastic-like isoform X2 [Asparagus officinalis]	22.3662	3.95389	0.0001	0.0001	0.0001	0.0001	65800.6	16.0058	up
ko00514	Other types of O-glycan biosynthesis	0.739087	MSTRG.2382	HHC003217	K18134	EC:2.4.1.255	EGF domain-specific O-linked N-acetylglucosamine transferase-like [Asparagus officinalis]	146.873	108.036	10.6245	20.6495	20.6131	20.5461	3.47654	1.79765	up
ko00561	Glycerolipid metabolism	0.760626	MSTRG.1763	HHC002296	K00128	EC:1.2.1.3	LOW QUALITY PROTEIN: aldehyde dehydrogenase family 2 member B7, mitochondrial-like [Asparagus officinalis]	6.2678	3.97913	21.1137	1.83199	2.49058	2.38107	3.40671	1.76838	up
ko00561	Glycerolipid metabolism	0.760626	MSTRG.18226	HHC020351	K00679	EC:2.3.1.158	GDSL esterase/lipase At5g55050-like [Asparagus officinalis]	1.40824	0.842409	0.0001	0.290364	0.0001	0.0001	6352.77	12.6332	up
ko00561	Glycerolipid metabolism	0.760626	MSTRG.29960	HHC038045	K00128	EC:1.2.1.3	aldehyde dehydrogenase family 3 member F1-like [Asparagus officinalis]	11.5084	25.0615	15.9162	16.8047	48.3212	50.8613	0.34931	-1.51742	down
ko00561	Glycerolipid metabolism	0.760626	MSTRG.30389	HHC038741	K00679	EC:2.3.1.158	GDSL esterase/lipase At5g45670-like [Asparagus officinalis]	22.6256	25.7842	5.51698	4.61803	3.73792	5.43363	3.19166	1.67431	up
ko00561	Glycerolipid metabolism	0.760626	MSTRG.31368	HHC040060	K01054	EC:3.1.1.23	uncharacterized protein LOC109820554 [Asparagus officinalis]	4.92083	7.24115	4.52399	2.94069	1.85522	2.62016	2.19274	1.13273	up
ko00561	Glycerolipid metabolism	0.760626	MSTRG.32379	HHC050107	K18693	EC:3.1.3.81;EC:3.1.3.4	lipid phosphate phosphatase 2-like isoform X1 [Ornithogalum longebracteatum]	74.7087	30.9919	16.0609	21.9264	13.6715	16.8261	2.35573	1.23617	up
ko00565	Ether lipid metabolism	0.767729	MSTRG.16176	HHC017216	K01115	EC:3.1.4.4	phospholipase D alpha 1-like [Asparagus officinalis]	1.24976	1.50664	3.73172	12.4518	13.199	13.3752	0.35636	-1.48859	down
ko00565	Ether lipid metabolism	0.767729	MSTRG.19632	HHC022240	K16794	NA	protein JINGUBANG [Citrus clementina]	1.07394	1.49209	7.69609	0.686854	0.835979	0.846174	3.25445	1.70242	up
ko00511	Other glycan degradation	0.779487	MSTRG.24262	HHC029270	K17108	EC:3.2.1.45	non-lysosomal glucosylceramidase-like [Asparagus officinalis]	91.2647	128.828	36.5726	63.2607	17.4003	55.1585	2.2046	1.14051	up
ko00511	Other glycan degradation	0.779487	MSTRG.8136	HHC046508	K12309	EC:3.2.1.23	beta-galactosidase isoform X2 [Asparagus officinalis]	635.079	323.323	31.8215	60.1851	70.0557	50.2006	4.36737	2.12677	up
ko00511	Other glycan degradation	0.779487	MSTRG.9579	HHC007524	K12309	EC:3.2.1.23	protein indeterminate-domain-containing protein [Cinnamomum micranthum f. kanehirae];protein indeterminate-domain 5, chloroplastic-like [Papaver somniferum]	13.7067	4.12411	8.69732	15.0544	2.23838	1.99841	4.90732	2.29493	up
ko03010	Ribosome	0.78794	MSTRG.14932	HHC015661	K02956	NA	uncharacterized protein LOC109819493 [Asparagus officinalis]	13.0445	13.7472	14.634	18.6569	1.52762	1.80894	9.00368	3.17051	up
ko03010	Ribosome	0.78794	MSTRG.18139	HHC020205	K02917	NA	Ribosomal protein [Parasponia andersonii]	2.93111	6.45994	3.62649	9.39373	14.1068	11.6891	0.434396	-1.20292	down
ko03010	Ribosome	0.78794	MSTRG.2098	HHC002759	K02888	NA	50S ribosomal protein L21, mitochondrial-like [Asparagus officinalis]	7.50989	3.49063	4.27727	1.18582	1.66682	0.82632	3.30178	1.72324	up
ko03010	Ribosome	0.78794	MSTRG.27137	HHC033897	K02906	NA	hypothetical protein B296_00025743 [Ensete ventricosum]	0.4368	0.330851	1.08392	0.173087	0.0936795	0.121337	4.70814	2.23516	up
ko03010	Ribosome	0.78794	MSTRG.28067	HHC035327	K02952	NA	uncharacterized protein LOC103703084 [Phoenix dactylifera];uncharacterized protein LOC110420332 [Herrania umbratica]	95.5891	27.6601	18.9992	15.2712	15.1725	13.9097	2.70819	1.43733	up
ko03010	Ribosome	0.78794	MSTRG.28071	HHC035319	K02952	NA	uncharacterized protein LOC103703084 [Phoenix dactylifera]	64.5016	16.3655	8.00845	6.91873	5.87217	6.01021	4.03094	2.01112	up
ko03010	Ribosome	0.78794	MSTRG.29464	HHC037260	K02963	NA	ribosomal protein S18 (chloroplast) [Hemiphylacus alatostylus]	8.4677	0.142757	0.12032	1.47467	0.415523	0.147812	9.05808	3.1792	up
ko03010	Ribosome	0.78794	MSTRG.32549	HHC051223	K02960	NA	PREDICTED: ribulose bisphosphate carboxylase/oxygenase activase 2, chloroplastic isoform X1 [Elaeis guineensis]	1941.86	1000.45	730.149	778.014	287.846	292.864	3.83193	1.93807	up
ko03010	Ribosome	0.78794	MSTRG.32733	HHC048473	K02912	NA	60S ribosomal protein L32-1, partial [Ananas comosus]	0.937414	0.652818	2.89518	0.146701	0.0001	0.259098	8.93545	3.15954	up
ko03010	Ribosome	0.78794	MSTRG.33021	HHC054024	K02939	NA	PREDICTED: uncharacterized protein LOC105054729 [Elaeis guineensis]	1.4345	0.955116	0.40121	0.268818	0.127872	0.251105	4.03671	2.01318	up
ko03010	Ribosome	0.78794	MSTRG.33506	HHC054040	K02930	NA	hypothetical protein B296_00026414 [Ensete ventricosum]	14.1842	8.54523	12.8665	5.39439	5.07698	4.92213	2.0497	1.03541	up
ko03010	Ribosome	0.78794	MSTRG.33806	HHC050313	K02960	NA	PREDICTED: 40S ribosomal protein S16-like [Elaeis guineensis]	174.887	96.2201	183.417	93.8509	72.8683	59.3762	2.07334	1.05196	up
ko03010	Ribosome	0.78794	MSTRG.35284	HHC050149	K02947	NA	PREDICTED: 40S ribosomal protein S10-1 [Elaeis guineensis]	135.101	96.7	176.464	54.3775	48.3044	65.5731	2.03132	1.02242	up
ko03010	Ribosome	0.78794	MSTRG.35499	HHC052653	K02960	NA	PREDICTED: 40S ribosomal protein S16-like [Elaeis guineensis]	12.0222	6.37637	11.7662	5.34237	4.81286	3.35647	2.1732	1.11982	up
ko03010	Ribosome	0.78794	MSTRG.35528	HHC048297	K02937	NA	PREDICTED: 60S ribosomal protein L7-2-like [Musa acuminata subsp. malaccensis]	10.0047	75.4594	48.6415	9.54225	113.005	134.925	0.289694	-1.7874	down
ko03010	Ribosome	0.78794	MSTRG.35823	HHC049172	K02889	NA	60S ribosomal protein L21-1 [Ananas comosus]	57.1265	0.499628	73.0082	31.0475	1.39335	1.54504	27.512	4.78199	up
ko03010	Ribosome	0.78794	MSTRG.3803	HHC005633	K02891	NA	PREDICTED: 60S ribosomal protein L22-3-like [Musa acuminata subsp. malaccensis];PREDICTED: 60S ribosomal protein L22-2-like [Musa acuminata subsp. malaccensis]	24.1515	19.1266	36.6569	12.4127	11.6683	8.22811	2.32072	1.21457	up
ko03010	Ribosome	0.78794	MSTRG.4861	HHC041594	K02906	NA	50S ribosomal protein L3-2, chloroplastic-like [Asparagus officinalis]	7.37218	3.7897	1.83928	0.84174	0.906454	0.738132	4.20863	2.07335	up
ko03010	Ribosome	0.78794	MSTRG.8455	HHC047022	K02975	NA	40S ribosomal protein S25-2 [Panicum hallii]	0.0001	21.2363	0.0001	6.26525	0.0001	0.0001	68754.3	16.0692	up
ko03010	Ribosome	0.78794	MSTRG.9118	HHC006768	K02891	NA	PREDICTED: 60S ribosomal protein L22-2-like [Musa acuminata subsp. malaccensis]	1.48214	1.12056	4.03628	3.1328	0.821191	0.761139	3.08778	1.62657	up
ko03010	Ribosome	0.78794	MSTRG.963	HHC001182	K02967	NA	ribosomal protein S2 (chloroplast) [Phormium tenax]	32.7459	8.68311	4.94487	30.1427	0.0001	0.0001	191292	17.5454	up
ko04144	Endocytosis	0.793409	gene-HHC031157	HHC031157	K11866	EC:3.4.19.12	PREDICTED: zinc finger BED domain-containing protein RICESLEEPER 2-like [Daucus carota subsp. sativus]	0.637246	0.0001	0.0001	1.59392	4.60702	2.9924	0.146812	-2.76796	down
ko04144	Endocytosis	0.793409	MSTRG.10196	HHC008742	K03283	NA	heat shock cognate 70 kDa protein 2-like [Asparagus officinalis];heat shock protein 70 [Chimonanthus praecox];heat shock cognate 70 kDa protein 2 [Asparagus officinalis];PREDICTED: heat shock cognate 70 kDa protein 2 [Oryza brachyantha]	11.2944	8.69681	8.42632	7.70646	28.7036	50.0233	0.229426	-2.1239	down
ko04144	Endocytosis	0.793409	MSTRG.1192	HHC001481	K11866	EC:3.4.19.12	AMSH-like ubiquitin thioesterase 2 isoform X1 [Asparagus officinalis]	30.5956	27.1271	53.7493	7.25534	11.233	3.80127	3.94857	1.98133	up
ko04144	Endocytosis	0.793409	MSTRG.15617	HHC016496	K11824	NA	AP-2 complex subunit alpha-2-like [Asparagus officinalis]	5.96091	2.84979	6.76359	5.33275	1.00613	2.17984	3.28111	1.71419	up
ko04144	Endocytosis	0.793409	MSTRG.16176	HHC017216	K01115	EC:3.1.4.4	phospholipase D alpha 1-like [Asparagus officinalis]	1.24976	1.50664	3.73172	12.4518	13.199	13.3752	0.35636	-1.48859	down
ko04144	Endocytosis	0.793409	MSTRG.21152	HHC024543	K12489	NA	PREDICTED: ADP-ribosylation factor GTPase-activating protein AGD3-like isoform X3 [Elaeis guineensis]	53.0184	32.6323	36.5282	23.5331	15.1888	16.6778	2.28628	1.19301	up
ko04144	Endocytosis	0.793409	MSTRG.2543	HHC003456	K12191	NA	vacuolar protein sorting-associated protein 2 homolog 1 [Asparagus officinalis]	36.9206	38.3705	19.3671	9.49024	12.8997	11.0924	2.17047	1.11801	up
ko04144	Endocytosis	0.793409	MSTRG.30437	HHC038809	K19366	NA	senescence/dehydration-associated protein At4g35985, chloroplastic-like isoform X1 [Asparagus officinalis]	28.1119	37.193	7.64082	5.99651	6.86261	7.01009	2.84524	1.50855	up
ko04144	Endocytosis	0.793409	MSTRG.30543	HHC038980	K01528	EC:3.6.5.5	Dynamin central domain-containing protein [Cinnamomum micranthum f. kanehirae]	35.1323	21.2297	4.75557	7.35818	6.4953	5.97577	2.74538	1.45701	up
ko04144	Endocytosis	0.793409	MSTRG.32694	HHC052759	K12486	NA	probable ADP-ribosylation factor GTPase-activating protein AGD5 [Asparagus officinalis]	189.138	90.8509	30.6447	21.9526	21.8942	25.1272	3.53654	1.82234	up
ko04144	Endocytosis	0.793409	MSTRG.33180	HHC050351	K19366	NA	PREDICTED: protein EARLY-RESPONSIVE TO DEHYDRATION 7, chloroplastic [Elaeis guineensis]	42.2967	19.1641	14.122	12.8856	10.2967	11.4114	2.03768	1.02693	up
ko04144	Endocytosis	0.793409	MSTRG.3444	HHC005083	K19366	NA	PREDICTED: senescence/dehydration-associated protein At4g35985, chloroplastic [Elaeis guineensis]	4.1558	3.57495	0.667472	0.50506	0.565513	0.37291	4.74374	2.24603	up
ko03013	RNA transport	0.822173	gene-HHC003837	HHC003837	K00784	EC:3.1.26.11	uncharacterized protein A4U43_C01F13400 [Asparagus officinalis]	5.31642	3.66266	5.97083	6.4409	2.30416	3.02032	2.00872	1.00628	up
ko03013	RNA transport	0.822173	MSTRG.12121	HHC011523	K07936	NA	putative RAN2 small Ras GTP-binding nuclear protein [Allium sativum];PREDICTED: GTP-binding nuclear protein Ran1B-like [Cucumis sativus]	51.3137	40.7733	12.0746	13.5401	12.8209	13.4771	2.23784	1.16211	up
ko03013	RNA transport	0.822173	MSTRG.14817	HHC015515	K13126	NA	NAC domain-containing protein 17-like [Asparagus officinalis]	128.742	78.7751	80.9433	64.2856	8.17233	10.921	9.2374	3.20749	up
ko03013	RNA transport	0.822173	MSTRG.17413	HHC018935	K02516	EC:2.1.1.320	protein arginine N-methyltransferase 5 isoform X1 [Asparagus officinalis]	16.9085	6.12118	2.97823	7.95592	3.02363	2.78692	2.9226	1.54725	up
ko03013	RNA transport	0.822173	MSTRG.20677	HHC023680	K12878	NA	THO complex subunit 1 isoform X2 [Asparagus officinalis]	27.4119	7.64463	26.2626	39.814	8.89558	11.0639	2.53346	1.34111	up
ko03013	RNA transport	0.822173	MSTRG.21508	HHC025087	K14290	NA	hypothetical protein PHAVU_011G020900g [Phaseolus vulgaris]	13.7614	7.16465	10.9226	9.5253	16.849	30.2264	0.439444	-1.18625	down
ko03013	RNA transport	0.822173	MSTRG.22545	HHC026853	K14297	NA	serpin-ZXA-like [Phoenix dactylifera]	36.5866	24.9685	13.3683	12.1026	9.15914	11.5225	2.10394	1.07309	up
ko03013	RNA transport	0.822173	MSTRG.2835	HHC003939	K03248	NA	eukaryotic translation initiation factor 3 subunit G-like [Phoenix dactylifera]	5.81003	0.590829	15.1313	2.98565	33.6349	30.1015	0.192337	-2.37829	down
ko03013	RNA transport	0.822173	MSTRG.29251	HHC036904	K03243	NA	uncharacterized protein A4U43_C04F15830 [Asparagus officinalis]	74.4437	45.2343	30.5183	22.335	14.9691	21.1619	2.38758	1.25555	up
ko03013	RNA transport	0.822173	MSTRG.2991	HHC004195	K14326	EC:3.6.4.-	PREDICTED: regulator of nonsense transcripts 1 homolog [Elaeis guineensis]	2.38069	5.33532	3.90537	5.53912	10.3396	11.2411	0.397589	-1.33065	down
ko03013	RNA transport	0.822173	MSTRG.31098	HHC039701	K03246	NA	eukaryotic translation initiation factor 3 subunit I-like isoform X1 [Ornithogalum longebracteatum]	7.09387	17.0214	3.95714	12.052	23.2	25.9341	0.408316	-1.29224	down
ko03013	RNA transport	0.822173	MSTRG.31601	HHC040400	K03248	NA	eukaryotic translation initiation factor 3 subunit G-B-like [Asparagus officinalis]	52.5699	34.1214	50.3316	28.6945	20.1074	20.0379	2.06397	1.04542	up
ko03013	RNA transport	0.822173	MSTRG.35116	HHC054135	K18213	EC:3.1.26.5	proteinaceous RNase P 1, chloroplastic/mitochondrial-like [Phoenix dactylifera]	21.6332	7.86041	17.8359	2.26513	3.75952	0.67657	5.58991	2.48282	up
ko03013	RNA transport	0.822173	MSTRG.35650	HHC048326	K13025	EC:3.6.4.13	eukaryotic initiation factor 4A-3 [Asparagus officinalis]	6.40125	2.13919	2.81916	1.02332	0.773758	0.906477	3.68488	1.88162	up
ko03013	RNA transport	0.822173	MSTRG.9767	HHC007947	K10577	NA	MOB kinase activator-like 1A [Asparagus officinalis]	21.31	17.0912	5.36832	5.91838	2.04988	1.93691	6.23157	2.6396	up
ko00290	Valine, leucine and isoleucine biosynthesis	0.828371	MSTRG.36021	HHC053662	K00826	EC:2.6.1.42	branched-chain-amino-acid aminotransferase 5, chloroplastic-like isoform X2 [Asparagus officinalis]	22.3662	3.95389	0.0001	0.0001	0.0001	0.0001	65800.6	16.0058	up
ko03060	Protein export	0.831358	MSTRG.20649	HHC023635	K03217	NA	ALBINO3-like protein 1, chloroplastic [Asparagus officinalis]	74.7458	105.774	120.26	112.922	45.6059	41.1248	2.38498	1.25398	up
ko03060	Protein export	0.831358	MSTRG.33807	HHC050316	K03116	NA	Coiled-coil domain-containing protein, putative [Ricinus communis]	72.3592	74.9858	56.375	18.2768	17.152	21.8741	2.84421	1.50803	up
ko03060	Protein export	0.831358	MSTRG.5217	HHC042178	K03116	NA	Coiled-coil domain-containing protein, putative [Ricinus communis]	52.0931	49.2693	32.4225	14.0515	13.2042	16.6025	2.47992	1.31029	up
ko00531	Glycosaminoglycan degradation	0.834298	MSTRG.8136	HHC046508	K12309	EC:3.2.1.23	beta-galactosidase isoform X2 [Asparagus officinalis]	635.079	323.323	31.8215	60.1851	70.0557	50.2006	4.36737	2.12677	up
ko00531	Glycosaminoglycan degradation	0.834298	MSTRG.9579	HHC007524	K12309	EC:3.2.1.23	protein indeterminate-domain-containing protein [Cinnamomum micranthum f. kanehirae];protein indeterminate-domain 5, chloroplastic-like [Papaver somniferum]	13.7067	4.12411	8.69732	15.0544	2.23838	1.99841	4.90732	2.29493	up
ko00760	Nicotinate and nicotinamide metabolism	0.838344	MSTRG.4981	HHC041802	K18551	EC:3.1.3.-	uncharacterized protein C24B11.05-like [Asparagus officinalis];uncharacterized protein C24B11.05 [Asparagus officinalis]	1027.33	1217.54	27.046	35.7743	36.743	40.5181	14.9343	3.90056	up
ko00562	Inositol phosphate metabolism	0.84858	gene-HHC045366	HHC045366	K00921	EC:2.7.1.150	1-phosphatidylinositol-3-phosphate 5-kinase FAB1A-like isoform X1 [Asparagus officinalis]	0.190037	0.0001	0.405825	4.04099	6.32693	7.49668	0.167719	-2.57589	down
ko00562	Inositol phosphate metabolism	0.84858	MSTRG.17861	HHC019660	K01092	EC:3.1.3.25	protein CURVATURE THYLAKOID 1B, chloroplastic-like [Asparagus officinalis]	1713.93	1330.69	843.491	540.284	499.746	486.815	2.24436	1.1663	up
ko00562	Inositol phosphate metabolism	0.84858	MSTRG.24644	HHC029749	K01092	EC:3.1.3.25	protein CURVATURE THYLAKOID 1C, chloroplastic isoform X2 [Asparagus officinalis]	14.7179	12.5221	11.9691	11.3177	44.8045	48.4683	0.270855	-1.88441	down
ko00562	Inositol phosphate metabolism	0.84858	MSTRG.26122	HHC032212	K18081	EC:3.1.3.64;EC:3.1.3.95	PREDICTED: heavy metal-associated isoprenylated plant protein 28 [Elaeis guineensis]	5.81276	2.8742	0.0001	0.0001	0.0001	0.0001	21717.9	14.4066	up
ko03410	Base excision repair	0.85234	MSTRG.10520	HHC009266	K10771	EC:4.2.99.18	glycosyltransferase-like At2g41451 [Asparagus officinalis]	0.724947	0.426462	1.21947	1.71915	3.43889	2.60162	0.33855	-1.56256	down
ko03410	Base excision repair	0.85234	MSTRG.6237	HHC043575	K10802	NA	HMG1/2-like protein [Asparagus officinalis]	224.626	111.88	91.8384	58.8357	47.8877	61.2249	2.23247	1.15864	up
ko00230	Purine metabolism	0.860185	MSTRG.14926	HHC015650	K00942	EC:2.7.4.8	uncharacterized protein A4U43_C08F9820 [Asparagus officinalis]	62.9369	53.8614	6.04542	9.10356	8.61536	8.40543	3.87606	1.95459	up
ko00230	Purine metabolism	0.860185	MSTRG.15026	HHC015774	K13811	EC:2.7.7.4;EC:2.7.1.25	ATP-sulfurylase [Allium cepa]	5.38357	44.5817	90.2161	11.4356	12.6451	11.9036	3.08809	1.62672	up
ko00230	Purine metabolism	0.860185	MSTRG.15747	HHC016745	K00940	EC:2.7.4.6	nucleoside diphosphate kinase, partial [Hyacinthus orientalis]	22.4573	11.2433	9.14017	4.40741	4.22295	4.70115	2.64722	1.40448	up
ko00230	Purine metabolism	0.860185	MSTRG.19899	HHC022603	K03006	EC:2.7.7.6	protein SRC2-like [Asparagus officinalis]	11.8903	8.70719	19.4042	5.01894	3.4315	4.57963	2.80988	1.49051	up
ko00230	Purine metabolism	0.860185	MSTRG.26945	HHC033466	K01522	EC:3.6.1.29	bifunctional bis(5'-adenosyl)-triphosphatase/adenylylsulfatase FHIT [Asparagus officinalis]	8.52649	4.99109	6.39896	2.08777	0.205426	2.33754	4.3265	2.1132	up
ko00230	Purine metabolism	0.860185	MSTRG.2773	HHC003851	K01490	EC:3.5.4.6	uncharacterized protein A4U43_C07F4260 [Asparagus officinalis]	311.028	355.038	51.5247	48.8539	53.6728	42.0441	4.00371	2.00134	up
ko00230	Purine metabolism	0.860185	MSTRG.28592	HHC036034	K00873	EC:2.7.1.40	pyruvate kinase, cytosolic isozyme [Asparagus officinalis]	27.4513	19.0294	8.57391	4.97046	4.61995	4.17644	3.41191	1.77058	up
ko00230	Purine metabolism	0.860185	MSTRG.33002	HHC047391	K00942	EC:2.7.4.8	uncharacterized protein A4U43_C08F9820 [Asparagus officinalis]	121.53	98.0555	5.12205	18.9304	17.6971	12.9465	3.97535	1.99108	up
ko00230	Purine metabolism	0.860185	MSTRG.35123	HHC054143	K00893	EC:2.7.1.74	uncharacterized protein LOC109823937 [Asparagus officinalis]	12.2289	4.74003	4.40464	2.9532	2.83742	2.29798	2.36854	1.244	up
ko00230	Purine metabolism	0.860185	MSTRG.35317	HHC050205	K01933	EC:6.3.3.1	phosphoribosylformylglycinamidine cyclo-ligase, chloroplastic/mitochondrial [Phoenix dactylifera]	0.607842	1.6667	1.23094	2.97423	3.66364	4.94014	0.376562	-1.40904	down
ko00230	Purine metabolism	0.860185	MSTRG.36046	HHC052142	K00760	EC:2.4.2.8	uncharacterized protein LOC109827543 [Asparagus officinalis]	6.93229	7.76277	9.25802	3.28041	3.77249	2.82115	2.06513	1.04623	up
ko00230	Purine metabolism	0.860185	MSTRG.4428	HHC040817	K03023	NA	uncharacterized protein A4U43_C05F19650 [Asparagus officinalis];PREDICTED: DNA-directed RNA polymerase III subunit rpc3 [Elaeis guineensis]	8.67016	6.35021	4.70646	5.54237	2.31111	1.65679	3.1842	1.67093	up
ko00790	Folate biosynthesis	0.868913	MSTRG.21518	HHC025098	K15631	EC:2.8.1.9	mitochondrial amidoxime reducing component 2-like [Asparagus officinalis]	5.44596	3.92241	1.72696	2.07102	1.05683	0.949131	3.2818	1.71449	up
ko00860	Porphyrin and chlorophyll metabolism	0.885891	MSTRG.16165	HHC017202	K21480	EC:1.14.15.20	heme oxygenase 1, chloroplastic-like [Asparagus officinalis]	181.012	127.598	105.545	45.4611	52.6667	51.6792	2.20236	1.13905	up
ko00860	Porphyrin and chlorophyll metabolism	0.885891	MSTRG.30044	HHC038166	K13545	EC:1.3.7.12	red chlorophyll catabolite reductase [Asparagus officinalis]	43.3756	18.8623	18.7055	6.62836	4.11101	6.95256	3.95766	1.98465	up
ko00945	Stilbenoid, diarylheptanoid and gingerol biosynthesis	0.893712	MSTRG.33550	HHC053582	K00588	EC:2.1.1.104	PREDICTED: caffeoyl-CoA O-methyltransferase [Nelumbo nucifera];caffeoyl-CoA O-methyltransferase [Amborella trichopoda]	40.8055	41.279	23.6435	17.0126	13.2273	13.0112	2.33894	1.22585	up
ko00030	Pentose phosphate pathway	0.900295	MSTRG.17225	HHC018652	K00895	EC:2.7.1.90	pyrophosphate--fructose 6-phosphate 1-phosphotransferase subunit alpha-like isoform X3 [Asparagus officinalis]	8.67272	5.93313	10.7158	3.61827	2.6715	3.79934	2.23618	1.16104	up
ko00030	Pentose phosphate pathway	0.900295	MSTRG.33635	HHC051480	K01810	EC:5.3.1.9	protein OSB2, chloroplastic-like [Asparagus officinalis]	11.0075	4.05807	2.10628	0.874752	1.10763	0.981011	4.32017	2.11109	up
ko00030	Pentose phosphate pathway	0.900295	MSTRG.34907	HHC051125	K01807	EC:5.3.1.6	probable ribose-5-phosphate isomerase 2 [Phoenix dactylifera]	70.7569	67.3868	110.489	32.2985	25.1993	26.2296	2.73126	1.44956	up
ko03018	RNA degradation	0.901164	gene-HHC014782	HHC014782	K12580	NA	CASP-like protein 4C1 [Dendrobium catenatum]	2.09714	1.51716	2.41375	2.82616	0.370033	0.368899	5.99123	2.58285	up
ko03018	RNA degradation	0.901164	gene-HHC038630	HHC038630	K14442	EC:3.6.4.13	PREDICTED: pentatricopeptide repeat-containing protein At3g61520, mitochondrial-like [Musa acuminata subsp. malaccensis]	10.7566	3.52358	1.47682	0.464809	0.61849	0.584727	6.74102	2.75297	up
ko03018	RNA degradation	0.901164	MSTRG.14734	HHC015409	K12592	NA	nuclear nucleic acid-binding protein C1D [Asparagus officinalis]	0.831318	0.986338	0.796153	0.176681	0.1222	0.183664	4.56165	2.18956	up
ko03018	RNA degradation	0.901164	MSTRG.14817	HHC015515	K13126	NA	NAC domain-containing protein 17-like [Asparagus officinalis]	128.742	78.7751	80.9433	64.2856	8.17233	10.921	9.2374	3.20749	up
ko03018	RNA degradation	0.901164	MSTRG.19311	HHC021789	K12619	EC:3.1.13.-	5'-3' exoribonuclease [Trema orientale]	3.7001	4.91699	3.07515	9.94887	11.322	12.4285	0.455593	-1.13418	down
ko03018	RNA degradation	0.901164	MSTRG.20596	HHC023548	K12581	NA	probable CCR4-associated factor 1 homolog 11 [Asparagus officinalis]	7.0703	3.20959	38.5433	1.83798	1.60592	1.28246	8.76984	3.13255	up
ko03018	RNA degradation	0.901164	MSTRG.28095	HHC035360	K12581	NA	probable CCR4-associated factor 1 homolog 11 [Asparagus officinalis]	3.42191	4.77024	53.8108	1.58509	0.679193	0.996675	18.9717	4.24577	up
ko03018	RNA degradation	0.901164	MSTRG.5833	HHC043022	K03679	NA	exosome complex component RRP4 homolog [Asparagus officinalis]	5.4151	6.30306	5.01781	5.1015	1.22165	3.62837	2.25128	1.17074	up
ko00564	Glycerophospholipid metabolism	0.917701	MSTRG.16176	HHC017216	K01115	EC:3.1.4.4	phospholipase D alpha 1-like [Asparagus officinalis]	1.24976	1.50664	3.73172	12.4518	13.199	13.3752	0.35636	-1.48859	down
ko00564	Glycerophospholipid metabolism	0.917701	MSTRG.18404	HHC020586	K18696	EC:3.1.4.46	glycerophosphodiester phosphodiesterase GDPD1, chloroplastic-like [Asparagus officinalis]	9.5047	23.9924	7.47873	1.70087	2.13811	2.71159	4.39993	2.13748	up
ko00564	Glycerophospholipid metabolism	0.917701	MSTRG.2017	HHC002654	K01126	EC:3.1.4.46	glycerophosphodiester phosphodiesterase GDPDL4-like [Asparagus officinalis]	91.3539	40.4276	9.02451	14.0705	13.9909	14.2049	2.74645	1.45757	up
ko00564	Glycerophospholipid metabolism	0.917701	MSTRG.2176	HHC002884	K14156	EC:2.7.1.32;EC:2.7.1.82	probable choline kinase 2 isoform X1 [Dendrobium catenatum];probable choline kinase 2 [Phoenix dactylifera]	35.4817	24.3449	2.30285	1.85693	1.94576	1.3019	9.85119	3.3003	up
ko00564	Glycerophospholipid metabolism	0.917701	MSTRG.32379	HHC050107	K18693	EC:3.1.3.81;EC:3.1.3.4	lipid phosphate phosphatase 2-like isoform X1 [Ornithogalum longebracteatum]	74.7087	30.9919	16.0609	21.9264	13.6715	16.8261	2.35573	1.23617	up
ko03040	Spliceosome	0.918308	MSTRG.10196	HHC008742	K03283	NA	heat shock cognate 70 kDa protein 2-like [Asparagus officinalis];heat shock protein 70 [Chimonanthus praecox];heat shock cognate 70 kDa protein 2 [Asparagus officinalis];PREDICTED: heat shock cognate 70 kDa protein 2 [Oryza brachyantha]	11.2944	8.69681	8.42632	7.70646	28.7036	50.0233	0.229426	-2.1239	down
ko03040	Spliceosome	0.918308	MSTRG.15311	HHC016087	K12870	NA	pre-mRNA-splicing factor ISY1 homolog [Asparagus officinalis]	49.8001	21.3124	23.3707	8.41584	8.96314	11.0193	2.57473	1.36442	up
ko03040	Spliceosome	0.918308	MSTRG.17936	HHC019795	K10599	EC:2.3.2.27	pre-mRNA-processing factor 19-like [Asparagus officinalis]	38.0539	25.1154	18.1818	5.77411	6.32063	5.53347	3.6749	1.8777	up
ko03040	Spliceosome	0.918308	MSTRG.19920	HHC022644	K12833	NA	splicing factor 3B subunit 6-like protein [Asparagus officinalis]	3.964	2.79405	3.25182	1.45805	0.821271	1.25763	2.75816	1.46371	up
ko03040	Spliceosome	0.918308	MSTRG.20607	HHC023563	K12733	EC:5.2.1.8	peptidyl-prolyl cis-trans isomerase CYP18-2 isoform X1 [Asparagus officinalis]	69.6164	47.0747	43.9833	23.5777	22.4076	21.3527	2.10524	1.07399	up
ko03040	Spliceosome	0.918308	MSTRG.20677	HHC023680	K12878	NA	THO complex subunit 1 isoform X2 [Asparagus officinalis]	27.4119	7.64463	26.2626	39.814	8.89558	11.0639	2.53346	1.34111	up
ko03040	Spliceosome	0.918308	MSTRG.20939	HHC024139	K12741	NA	PREDICTED: glycine-rich RNA-binding protein 4, mitochondrial-like [Musa acuminata subsp. malaccensis]	72.5024	40.8521	25.9846	14.3914	15.6308	16.1304	2.4201	1.27507	up
ko03040	Spliceosome	0.918308	MSTRG.21272	HHC024758	K11088	NA	small nuclear ribonucleoprotein SmD3b-like [Papaver somniferum]	9.97178	6.89129	4.72385	4.82051	2.63373	3.22564	2.25343	1.17212	up
ko03040	Spliceosome	0.918308	MSTRG.35650	HHC048326	K13025	EC:3.6.4.13	eukaryotic initiation factor 4A-3 [Asparagus officinalis]	6.40125	2.13919	2.81916	1.02332	0.773758	0.906477	3.68488	1.88162	up
ko03040	Spliceosome	0.918308	MSTRG.5136	HHC042051	K12815	EC:3.6.4.13	LOW QUALITY PROTEIN: pre-mRNA-splicing factor ATP-dependent RNA helicase DEAH7 [Asparagus officinalis]	131.967	127.344	95.5132	128.637	21.9918	21.4001	5.57088	2.47791	up
ko03040	Spliceosome	0.918308	MSTRG.6151	HHC043461	K12859	NA	hypothetical protein Ahy_B04g071666 [Arachis hypogaea];PREDICTED: thioredoxin-like protein YLS8 [Brassica rapa]	144.131	351.039	113.106	56.5331	54.8418	59.8788	2.89751	1.53482	up
ko00904	Diterpenoid biosynthesis	0.923567	MSTRG.16548	HHC017747	K05278;K05282	EC:1.14.20.6;EC:1.14.11.12	uncharacterized protein A4U43_C03F22860 [Asparagus officinalis]	21.353	107.785	229.823	27.6394	30.4086	30.7811	3.15904	1.65949	up
ko03430	Mismatch repair	0.92774	MSTRG.25788	HHC031632	K07466	NA	uncharacterized protein At4g28440 [Amborella trichopoda]	101.55	46.6324	25.0715	60.6629	20.3122	22.548	2.72884	1.44829	up
ko03430	Mismatch repair	0.92774	MSTRG.35393	HHC052318	K08734	NA	LOW QUALITY PROTEIN: DNA mismatch repair protein MLH1 [Asparagus officinalis]	4.00729	4.18402	2.21228	1.62583	0.934569	1.1521	2.88244	1.52729	up
ko00020	Citrate cycle (TCA cycle)	0.944854	MSTRG.18398	HHC020582	K00162	EC:1.2.4.1	pyruvate dehydrogenase E1 component subunit beta-1, mitochondrial [Quercus suber]	40.9418	33.1732	20.3804	11.7773	12.8854	12.2776	2.11169	1.0784	up
ko00020	Citrate cycle (TCA cycle)	0.944854	MSTRG.31350	HHC040039	K00627	EC:2.3.1.12	dihydrolipoyllysine-residue acetyltransferase component 4 of pyruvate dehydrogenase complex, chloroplastic [Sesamum indicum]	9.28997	5.09968	7.16496	2.47162	2.53182	2.52062	2.37769	1.24956	up
ko00600	Sphingolipid metabolism	0.948714	MSTRG.24262	HHC029270	K17108	EC:3.2.1.45	non-lysosomal glucosylceramidase-like [Asparagus officinalis]	91.2647	128.828	36.5726	63.2607	17.4003	55.1585	2.2046	1.14051	up
ko00600	Sphingolipid metabolism	0.948714	MSTRG.8136	HHC046508	K12309	EC:3.2.1.23	beta-galactosidase isoform X2 [Asparagus officinalis]	635.079	323.323	31.8215	60.1851	70.0557	50.2006	4.36737	2.12677	up
ko00600	Sphingolipid metabolism	0.948714	MSTRG.9579	HHC007524	K12309	EC:3.2.1.23	protein indeterminate-domain-containing protein [Cinnamomum micranthum f. kanehirae];protein indeterminate-domain 5, chloroplastic-like [Papaver somniferum]	13.7067	4.12411	8.69732	15.0544	2.23838	1.99841	4.90732	2.29493	up
ko03022	Basal transcription factors	0.952708	MSTRG.19089	HHC021483	K03139	EC:3.6.4.12	transcription initiation factor IIF subunit beta-like [Phoenix dactylifera]	19.3759	9.6618	10.1975	8.27605	26.7001	28.5719	0.429795	-1.21828	down
ko04141	Protein processing in endoplasmic reticulum	0.953225	gene-HHC042570	HHC042570	K03094	NA	NAC domain-containing protein 35-like [Asparagus officinalis]	6.18395	5.71707	0.463664	0.339319	0.457792	0.0001	13.8723	3.79413	up
ko04141	Protein processing in endoplasmic reticulum	0.953225	MSTRG.10196	HHC008742	K03283	NA	heat shock cognate 70 kDa protein 2-like [Asparagus officinalis];heat shock protein 70 [Chimonanthus praecox];heat shock cognate 70 kDa protein 2 [Asparagus officinalis];PREDICTED: heat shock cognate 70 kDa protein 2 [Oryza brachyantha]	11.2944	8.69681	8.42632	7.70646	28.7036	50.0233	0.229426	-2.1239	down
ko04141	Protein processing in endoplasmic reticulum	0.953225	MSTRG.15210	HHC015968	K03868	EC:2.3.2.32	GEM-like protein 1 [Ananas comosus];PREDICTED: GEM-like protein 1 [Musa acuminata subsp. malaccensis]	11.2615	19.6428	5.58189	3.18694	3.65891	0.884531	4.36599	2.12631	up
ko04141	Protein processing in endoplasmic reticulum	0.953225	MSTRG.15913	HHC016870	K03094	NA	SKP1-like protein 1A [Asparagus officinalis]	231.846	119.328	159.363	78.4295	70.714	69.8684	2.09474	1.06677	up
ko04141	Protein processing in endoplasmic reticulum	0.953225	MSTRG.18427	HHC020613	K12669	NA	PREDICTED: nuclear transport factor 2-like [Gossypium raimondii]	27.9683	31.0366	7.26771	10.7176	9.19182	7.56488	2.2973	1.19994	up
ko04141	Protein processing in endoplasmic reticulum	0.953225	MSTRG.25849	HHC031745	K06689	EC:2.3.2.23	ubiquitin-conjugating enzyme E2-17 kDa-like [Asparagus officinalis]	0.311395	0.345881	7.03772	10.9855	0.183984	0.120336	30.6922	4.9398	up
ko04141	Protein processing in endoplasmic reticulum	0.953225	MSTRG.27548	HHC034543	K14015	NA	LOW QUALITY PROTEIN: NPL4-like protein 2 [Asparagus officinalis]	6.73209	4.14609	3.84729	2.69222	1.58741	1.47728	2.84167	1.50674	up
ko04141	Protein processing in endoplasmic reticulum	0.953225	MSTRG.30559	HHC039000	K13993	NA	18.0 kDa class I heat shock protein-like [Asparagus officinalis]	64.9015	43.4951	8.12767	1.92728	1.99745	2.9941	11.8652	3.56867	up
ko04141	Protein processing in endoplasmic reticulum	0.953225	MSTRG.3101	HHC004397	K04079	NA	PREDICTED: uncharacterized protein LOC103995568 isoform X3 [Musa acuminata subsp. malaccensis]	3.09398	2.51154	0.202771	0.0001	0.0291534	0.0001	99.2773	6.63339	up
ko04141	Protein processing in endoplasmic reticulum	0.953225	MSTRG.33702	HHC052506	K06689	EC:2.3.2.23	ubiquitin-conjugating enzyme E2 28 [Phoenix dactylifera]	29.3896	33.57	15.8096	8.59258	10.4121	9.15933	2.23187	1.15825	up
ko04141	Protein processing in endoplasmic reticulum	0.953225	MSTRG.34229	HHC049269	K08054	NA	calnexin homolog [Asparagus officinalis]	61.0103	57.3906	41.1985	65.5985	9.03935	42.9136	2.16732	1.11592	up
ko04141	Protein processing in endoplasmic reticulum	0.953225	MSTRG.8612	HHC047245	K09580	EC:5.3.4.1	protein disulfide-isomerase-like [Asparagus officinalis];protein disulfide-isomerase-like [Phoenix dactylifera]	24.2501	61.976	37.0693	37.7839	102.1	92.1561	0.414606	-1.27019	down
ko00052	Galactose metabolism	0.95372	MSTRG.23026	HHC027569	K01187	EC:3.2.1.20	uncharacterized protein A4U43_C06F500 [Asparagus officinalis]	36.6608	8.33592	1.19957	0.600852	0.48931	0.950846	16.2473	4.02213	up
ko00052	Galactose metabolism	0.95372	MSTRG.34918	HHC053430	K18819	EC:2.4.1.123	galactinol synthase 1-like [Asparagus officinalis]	1354.56	403.981	370.346	208.835	215.536	214.95	2.71522	1.44107	up
ko00052	Galactose metabolism	0.95372	MSTRG.8136	HHC046508	K12309	EC:3.2.1.23	beta-galactosidase isoform X2 [Asparagus officinalis]	635.079	323.323	31.8215	60.1851	70.0557	50.2006	4.36737	2.12677	up
ko00052	Galactose metabolism	0.95372	MSTRG.9579	HHC007524	K12309	EC:3.2.1.23	protein indeterminate-domain-containing protein [Cinnamomum micranthum f. kanehirae];protein indeterminate-domain 5, chloroplastic-like [Papaver somniferum]	13.7067	4.12411	8.69732	15.0544	2.23838	1.99841	4.90732	2.29493	up
ko00500	Starch and sucrose metabolism	0.956442	MSTRG.1373	HHC001755	K00696	EC:2.4.1.14	probable sucrose-phosphate synthase 4 isoform X1 [Asparagus officinalis]	32.1968	36.9941	2.43072	3.55017	3.29091	3.21684	5.77556	2.52996	up
ko00500	Starch and sucrose metabolism	0.956442	MSTRG.14645	HHC015264	K19891	EC:3.2.1.39	glucan endo-1,3-beta-glucosidase-like isoform X1 [Ananas comosus];PREDICTED: glucan endo-1,3-beta-glucosidase [Elaeis guineensis]	25.6139	5.64516	1.46098	1.10693	0.590721	0.509552	15.3721	3.94224	up
ko00500	Starch and sucrose metabolism	0.956442	MSTRG.17759	HHC019457	K01188	EC:3.2.1.21	beta-glucosidase 31-like isoform X1 [Asparagus officinalis]	51.8504	28.3881	23.8236	13.9352	12.5498	14.593	2.17363	1.12011	up
ko00500	Starch and sucrose metabolism	0.956442	MSTRG.21871	HHC025549	K01176	EC:3.2.1.1	PREDICTED: alpha-amylase isozyme 3D isoform X1 [Elaeis guineensis]	28.4958	8.93893	1.47647	3.14026	3.73044	2.63105	3.30516	1.72472	up
ko00500	Starch and sucrose metabolism	0.956442	MSTRG.22032	HHC025828	K01087	EC:3.1.3.12	PREDICTED: probable trehalose-phosphate phosphatase 6 [Elaeis guineensis]	4.98524	6.54405	2.59271	0.961519	1.07698	1.06205	3.52579	1.81794	up
ko00500	Starch and sucrose metabolism	0.956442	MSTRG.23026	HHC027569	K01187	EC:3.2.1.20	uncharacterized protein A4U43_C06F500 [Asparagus officinalis]	36.6608	8.33592	1.19957	0.600852	0.48931	0.950846	16.2473	4.02213	up
ko00500	Starch and sucrose metabolism	0.956442	MSTRG.25071	HHC030373	K00975	EC:2.7.7.27	glucose-1-phosphate adenylyltransferase small subunit, chloroplastic/amyloplastic [Asparagus officinalis]	113.468	128.171	72.4958	17.0292	19.0713	18.5471	4.40164	2.13804	up
ko00500	Starch and sucrose metabolism	0.956442	MSTRG.32924	HHC054016	K19891	EC:3.2.1.39	beta 1,3-glucanase [Lilium regale]	94.885	22.8181	3.46458	1.90856	2.82757	0.669659	17.5962	4.13719	up
ko00500	Starch and sucrose metabolism	0.956442	MSTRG.33635	HHC051480	K01810	EC:5.3.1.9	protein OSB2, chloroplastic-like [Asparagus officinalis]	11.0075	4.05807	2.10628	0.874752	1.10763	0.981011	4.32017	2.11109	up
ko00500	Starch and sucrose metabolism	0.956442	MSTRG.3842	HHC005704	K00847	EC:2.7.1.4	universal stress protein PHOS32 isoform X2 [Phoenix dactylifera]	239.102	257.875	119.337	95.9595	88.7733	84.9238	2.05033	1.03586	up
ko00500	Starch and sucrose metabolism	0.956442	MSTRG.8392	HHC046922	K01188	EC:3.2.1.21	beta-glucosidase 12-like [Asparagus officinalis]	0.0001	320.613	17.2562	0.0001	0.0001	0.0001	844674	19.688	up
ko00970	Aminoacyl-tRNA biosynthesis	0.966446	MSTRG.18596	HHC020817	K01883	EC:6.1.1.16	PREDICTED: uncharacterized protein LOC103970026 [Musa acuminata subsp. malaccensis]	118.297	66.2836	59.8089	30.8759	31.7787	31.0915	2.18915	1.13037	up
ko00970	Aminoacyl-tRNA biosynthesis	0.966446	MSTRG.22752	HHC027182	K01870	EC:6.1.1.5	dirigent protein 22-like [Phoenix dactylifera]	57.0396	109.902	27.5777	39.3009	29.7732	24.9858	2.13499	1.09423	up
ko00970	Aminoacyl-tRNA biosynthesis	0.966446	MSTRG.33261	HHC051360	K22503	EC:6.1.1.12	LOW QUALITY PROTEIN: aspartate--tRNA ligase 2, cytoplasmic-like [Asparagus officinalis]	235.797	167.719	102.73	80.4369	77.4323	66.5304	2.03762	1.02689	up
ko00510	N-Glycan biosynthesis	0.973276	MSTRG.18427	HHC020613	K12669	NA	PREDICTED: nuclear transport factor 2-like [Gossypium raimondii]	27.9683	31.0366	7.26771	10.7176	9.19182	7.56488	2.2973	1.19994	up
ko00040	Pentose and glucuronate interconversions	0.978945	gene-HHC007662	HHC007662	K01213	EC:3.2.1.67	polygalacturonase At1g48100-like [Asparagus officinalis]	0.0001	0.734268	0.299526	0.94419	2.83937	1.85468	0.210701	-2.24673	down
ko00040	Pentose and glucuronate interconversions	0.978945	MSTRG.24937	HHC030177	K01051	EC:3.1.1.11	pectinesterase-like [Phoenix dactylifera]	274.179	109.911	44.9065	29.486	22.2225	26.516	4.7035	2.23373	up
ko00040	Pentose and glucuronate interconversions	0.978945	MSTRG.30053	HHC038191	K01051	EC:3.1.1.11	uncharacterized protein A4U43_C03F15560 [Asparagus officinalis]	92.1468	123.095	14.2133	11.055	12.8506	11.3714	4.9647	2.31171	up
ko00040	Pentose and glucuronate interconversions	0.978945	MSTRG.34292	HHC053035	K01051	EC:3.1.1.11	PREDICTED: pectinesterase-like [Elaeis guineensis]	7.81736	3.83239	1.26918	0.804019	1.2744	0.666617	3.53499	1.82171	up
ko00040	Pentose and glucuronate interconversions	0.978945	MSTRG.34756	HHC048506	K00008	EC:1.1.1.14	sorbitol dehydrogenase [Asparagus officinalis]	35.5841	27.8592	12.8445	15.2947	11.695	8.79363	2.23496	1.16025	up
ko00040	Pentose and glucuronate interconversions	0.978945	MSTRG.7292	HHC044926	K01051	EC:3.1.1.11	MDIS1-interacting receptor like kinase 1-like [Phoenix dactylifera]	3.58783	3.9205	0.832511	0.0001	0.234453	0.0001	17.7805	4.15222	up
ko03420	Nucleotide excision repair	0.981435	MSTRG.15210	HHC015968	K03868	EC:2.3.2.32	GEM-like protein 1 [Ananas comosus];PREDICTED: GEM-like protein 1 [Musa acuminata subsp. malaccensis]	11.2615	19.6428	5.58189	3.18694	3.65891	0.884531	4.36599	2.12631	up
ko03420	Nucleotide excision repair	0.981435	MSTRG.25788	HHC031632	K07466	NA	uncharacterized protein At4g28440 [Amborella trichopoda]	101.55	46.6324	25.0715	60.6629	20.3122	22.548	2.72884	1.44829	up
ko03440	Homologous recombination	0.983193	MSTRG.21721	HHC025352	K12173	NA	hypothetical protein AQUCO_00600208v1 [Aquilegia coerulea]	10.3177	2.22414	1.39171	19.7416	18.2182	41.2648	0.283066	-1.82079	down
ko03440	Homologous recombination	0.983193	MSTRG.22975	HHC027482	K03553	NA	DNA repair protein recA homolog 1, chloroplastic isoform X1 [Asparagus officinalis]	7.00251	5.5175	10.5957	7.30046	4.34482	1.6981	2.51668	1.33152	up
ko03440	Homologous recombination	0.983193	MSTRG.25788	HHC031632	K07466	NA	uncharacterized protein At4g28440 [Amborella trichopoda]	101.55	46.6324	25.0715	60.6629	20.3122	22.548	2.72884	1.44829	up
ko03015	mRNA surveillance pathway	0.984526	MSTRG.11889	HHC011230	K04354	NA	Protein phosphatase 2A [Macleaya cordata];hypothetical protein DVH24_020318 [Malus domestica];serine/threonine protein phosphatase 2A 55 kDa regulatory subunit B beta isoform isoform X5 [Citrus sinensis];serine/threonine protein phosphatase 2A 55 kDa regulatory subunit B beta isoform isoform X2 [Glycine max];Serine/threonine protein phosphatase 2A 55 kDa regulatory subunit B beta isoform isoform …	15.2796	25.9119	26.9338	7.72276	5.66792	7.78292	2.81945	1.49542	up
ko03015	mRNA surveillance pathway	0.984526	MSTRG.14698	HHC015352	K14416	NA	PREDICTED: flowering-promoting factor 1-like protein 3 [Musa acuminata subsp. malaccensis]	12.1762	7.03101	0.311402	0.441646	0.200347	0.0001	49.7894	5.63777	up
ko03015	mRNA surveillance pathway	0.984526	MSTRG.14817	HHC015515	K13126	NA	NAC domain-containing protein 17-like [Asparagus officinalis]	128.742	78.7751	80.9433	64.2856	8.17233	10.921	9.2374	3.20749	up
ko03015	mRNA surveillance pathway	0.984526	MSTRG.1695	HHC002189	K14416	NA	PREDICTED: flowering-promoting factor 1-like protein 3 [Daucus carota subsp. sativus]	90.9784	99.7728	21.7071	8.1056	9.32007	14.5751	4.61524	2.20641	up
ko03015	mRNA surveillance pathway	0.984526	MSTRG.2991	HHC004195	K14326	EC:3.6.4.-	PREDICTED: regulator of nonsense transcripts 1 homolog [Elaeis guineensis]	2.38069	5.33532	3.90537	5.53912	10.3396	11.2411	0.397589	-1.33065	down
ko03015	mRNA surveillance pathway	0.984526	MSTRG.35650	HHC048326	K13025	EC:3.6.4.13	eukaryotic initiation factor 4A-3 [Asparagus officinalis]	6.40125	2.13919	2.81916	1.02332	0.773758	0.906477	3.68488	1.88162	up
ko03020	RNA polymerase	0.989803	MSTRG.19899	HHC022603	K03006	EC:2.7.7.6	protein SRC2-like [Asparagus officinalis]	11.8903	8.70719	19.4042	5.01894	3.4315	4.57963	2.80988	1.49051	up
ko03020	RNA polymerase	0.989803	MSTRG.4428	HHC040817	K03023	NA	uncharacterized protein A4U43_C05F19650 [Asparagus officinalis];PREDICTED: DNA-directed RNA polymerase III subunit rpc3 [Elaeis guineensis]	8.67016	6.35021	4.70646	5.54237	2.31111	1.65679	3.1842	1.67093	up
ko03030	DNA replication	0.991739	MSTRG.25788	HHC031632	K07466	NA	uncharacterized protein At4g28440 [Amborella trichopoda]	101.55	46.6324	25.0715	60.6629	20.3122	22.548	2.72884	1.44829	up
ko00240	Pyrimidine metabolism	0.996894	MSTRG.15747	HHC016745	K00940	EC:2.7.4.6	nucleoside diphosphate kinase, partial [Hyacinthus orientalis]	22.4573	11.2433	9.14017	4.40741	4.22295	4.70115	2.64722	1.40448	up
ko00240	Pyrimidine metabolism	0.996894	MSTRG.18615	HHC020842	K13800	EC:2.7.4.14	UMP-CMP kinase 3-like [Asparagus officinalis]	10.6926	8.52766	2.40352	1.72115	1.62231	1.87466	3.33788	1.73893	up
ko00240	Pyrimidine metabolism	0.996894	MSTRG.19899	HHC022603	K03006	EC:2.7.7.6	protein SRC2-like [Asparagus officinalis]	11.8903	8.70719	19.4042	5.01894	3.4315	4.57963	2.80988	1.49051	up
ko00240	Pyrimidine metabolism	0.996894	MSTRG.35123	HHC054143	K00893	EC:2.7.1.74	uncharacterized protein LOC109823937 [Asparagus officinalis]	12.2289	4.74003	4.40464	2.9532	2.83742	2.29798	2.36854	1.244	up
ko00240	Pyrimidine metabolism	0.996894	MSTRG.4428	HHC040817	K03023	NA	uncharacterized protein A4U43_C05F19650 [Asparagus officinalis];PREDICTED: DNA-directed RNA polymerase III subunit rpc3 [Elaeis guineensis]	8.67016	6.35021	4.70646	5.54237	2.31111	1.65679	3.1842	1.67093	up

## Sheet: Genes enrichment in roots
KEGG enrichment genes in roots
pathway_id	pathway_name	pvalue	Gene_ID	Gene_name	KO_ENTRY	EC	Description	FPKM.NaCl_root_1	FPKM.NaCl_root_2	FPKM.NaCl_root_3	FPKM.NT_root_1	FPKM.NT_root_2	FPKM.NT_root_3	fc	log2(fc)	regulation
ko03010	Ribosome	2.02505e-13	gene-HHC003128	HHC003128	K02866	NA	acid phosphatase 1-like [Asparagus officinalis]	0.508033	0.357869	0.315365	0.104419	0.0976893	0.0677688	4.37706	2.12996	up
ko03010	Ribosome	2.02505e-13	gene-HHC023485	HHC023485	K02925	NA	60S ribosomal protein L3 isoform X1 [Asparagus officinalis]	0.66998	0.275897	1.20406	0.142383	0.38078	0.38389	2.37024	1.24503	up
ko03010	Ribosome	2.02505e-13	gene-HHC048522	HHC048522	K02982	NA	cytochrome c biogenesis FN (mitochondrion) [Cocos nucifera]	0.876712	0.482088	0.689435	0.327043	0.341588	0.175011	2.42785	1.27968	up
ko03010	Ribosome	2.02505e-13	MSTRG.10027	HHC008494	K02973	NA	uncharacterized protein A4U43_C07F3660 [Asparagus officinalis];hypothetical protein B456_006G168700 [Gossypium raimondii]	135.36	76.6713	50.1003	252.093	256.263	241.673	0.349495	-1.51666	down
ko03010	Ribosome	2.02505e-13	MSTRG.10064	HHC008549	K02918	NA	60S ribosomal protein L35-like [Asparagus officinalis]	745.554	582.429	473.32	1269.22	1217.42	1199.38	0.488684	-1.03303	down
ko03010	Ribosome	2.02505e-13	MSTRG.10091	HHC008586	K02957	NA	PREDICTED: 40S ribosomal protein S15a [Vigna angularis]	96.7613	75.0102	79.0858	234.65	227.047	231.035	0.362127	-1.46543	down
ko03010	Ribosome	2.02505e-13	MSTRG.10101	HHC008601	K02917	NA	ribosomal protein L33 [Castanea sativa]	42.096	36.6262	25.4165	106.907	100.62	105.407	0.332782	-1.58735	down
ko03010	Ribosome	2.02505e-13	MSTRG.1021	HHC001259	K02957	NA	40S ribosomal protein S15a-5-like [Phoenix dactylifera]	90.2537	100.053	78.5634	217.836	228.896	212.552	0.407821	-1.29399	down
ko03010	Ribosome	2.02505e-13	MSTRG.1037	HHC001279	K02868	NA	hypothetical protein AQUCO_02100176v1 [Aquilegia coerulea]	76.1222	54.1152	43.9876	166.715	161.686	166.509	0.352034	-1.50621	down
ko03010	Ribosome	2.02505e-13	MSTRG.10685	HHC009513	K02908	NA	60S ribosomal protein L30 [Asparagus officinalis]	30.605	16.0015	13.4351	54.9119	58.0527	55.0694	0.357318	-1.48472	down
ko03010	Ribosome	2.02505e-13	MSTRG.10764	HHC009644	K02914	NA	uncharacterized protein LOC109823552 [Asparagus officinalis]	31.9246	28.1706	29.5884	62.9899	63.1799	59.8935	0.482006	-1.05288	down
ko03010	Ribosome	2.02505e-13	MSTRG.10799	HHC009697	K02977	NA	ubiquitin-40S ribosomal protein S27a [Solanum tuberosum]	12.8184	6.11828	6.55292	64.6343	64.4876	63.6822	0.132205	-2.91915	down
ko03010	Ribosome	2.02505e-13	MSTRG.11180	HHC010270	K02989	NA	40S ribosomal protein S5-like [Asparagus officinalis]	22.2885	14.844	11.0353	76.847	74.3521	77.9413	0.210211	-2.25009	down
ko03010	Ribosome	2.02505e-13	MSTRG.11314	HHC010446	K02935	NA	PREDICTED: 50S ribosomal protein L12, chloroplastic-like [Elaeis guineensis]	0.0291848	0.0944459	0.132244	8.14813	7.58354	8.25161	0.0106689	-6.55045	down
ko03010	Ribosome	2.02505e-13	MSTRG.11666	HHC010916	K02942	NA	60S acidic ribosomal protein P1-like [Asparagus officinalis]	22.526	18.1469	15.1187	40.4659	39.2128	41.326	0.46107	-1.11694	down
ko03010	Ribosome	2.02505e-13	MSTRG.11769	HHC011064	K02863	NA	50S ribosomal protein L1, chloroplastic [Apostasia shenzhenica]	2.71514	2.25159	1.72457	7.14402	7.78826	6.66824	0.309775	-1.69071	down
ko03010	Ribosome	2.02505e-13	MSTRG.11851	HHC011172	K02974	NA	40S ribosomal protein S24-1 [Ananas comosus]	24.701	19.3735	18.7625	57.6121	57.9228	52.7649	0.373364	-1.42135	down
ko03010	Ribosome	2.02505e-13	MSTRG.11900	HHC011247	K02872	NA	60S ribosomal protein L13a-4 [Vigna radiata var. radiata]	0.202528	0.0591542	0.354531	0.0430127	0.0001	0.0457618	6.93353	2.79359	up
ko03010	Ribosome	2.02505e-13	MSTRG.12373	HHC011831	K02955	NA	protein ORANGE, chloroplastic-like isoform X1 [Asparagus officinalis]	4.56712	7.52516	11.4159	17.723	17.0147	14.2341	0.480035	-1.05879	down
ko03010	Ribosome	2.02505e-13	MSTRG.12503	HHC012040	K02997	NA	40S ribosomal protein like [Actinidia chinensis var. chinensis]	3.39439	2.17969	0.525296	10.0655	13.4114	12.2497	0.170724	-2.55026	down
ko03010	Ribosome	2.02505e-13	MSTRG.12819	HHC012613	K02940	NA	60S ribosomal protein L9-like [Asparagus officinalis]	15.8745	12.2676	12.6039	34.9945	31.772	33.2193	0.407518	-1.29506	down
ko03010	Ribosome	2.02505e-13	MSTRG.12971	HHC012891	K02950	NA	ribosomal protein S12 (mitochondrion) [Allium cepa]	5.11485	2.09126	7.64814	0.498794	0.804427	0.536774	8.07298	3.0131	up
ko03010	Ribosome	2.02505e-13	MSTRG.13230	HHC013340	K02900	NA	Ribosomal protein L18e/L15P [Corchorus olitorius]	61.6736	40.9583	39.8914	103.3	104.491	108.753	0.450247	-1.15121	down
ko03010	Ribosome	2.02505e-13	MSTRG.13242	HHC013362	K02949	NA	40S ribosomal protein S11 [Asparagus officinalis]	40.2679	27.5505	25.2366	77.4718	76.4851	75.2416	0.406002	-1.30044	down
ko03010	Ribosome	2.02505e-13	MSTRG.13326	HHC013465	K02981	NA	40S ribosomal protein S2-4 [Populus trichocarpa]	44.8253	28.3696	32.6553	107.784	108.101	107.496	0.327324	-1.61121	down
ko03010	Ribosome	2.02505e-13	MSTRG.13483	HHC013675	K02979	NA	hypothetical protein SORBI_3001G493001 [Sorghum bicolor]	165.689	142.523	133.094	316.883	308.468	317.402	0.468104	-1.0951	down
ko03010	Ribosome	2.02505e-13	MSTRG.13694	HHC013972	K02871	NA	50S ribosomal protein L13, chloroplastic [Asparagus officinalis]	13.1032	8.37489	7.3031	22.8045	24.2979	23.2523	0.409087	-1.28952	down
ko03010	Ribosome	2.02505e-13	MSTRG.13840	HHC014157	K02938	NA	PREDICTED: 60S ribosomal protein L8-like [Elaeis guineensis]	878.735	820.111	699.563	2057.07	2074.99	2131.07	0.382941	-1.3848	down
ko03010	Ribosome	2.02505e-13	MSTRG.13950	HHC014317	K02880	NA	60S ribosomal protein L17-like [Asparagus officinalis]	136.847	96.092	47.9852	337.46	359.196	313.606	0.278071	-1.84647	down
ko03010	Ribosome	2.02505e-13	MSTRG.14088	HHC014487	K02912	NA	60S ribosomal protein L32-1 [Asparagus officinalis];60S ribosomal protein L32-1-like [Asparagus officinalis]	160.81	88.6423	95.4605	247.321	261.708	246.225	0.456685	-1.13073	down
ko03010	Ribosome	2.02505e-13	MSTRG.14142	HHC014575	K02997	NA	40S ribosomal protein S9-2 [Amborella trichopoda];hypothetical protein AMTR_s00010p00256040 [Amborella trichopoda];PREDICTED: 40S ribosomal protein S9-2 [Vitis vinifera]	9.75012	3.35669	1.24978	29.666	31.4729	29.8178	0.15784	-2.66347	down
ko03010	Ribosome	2.02505e-13	MSTRG.14269	HHC014770	K02920	NA	60S ribosomal protein L36-3-like [Phalaenopsis equestris]	27.2704	26.4421	21.9661	57.3961	42.8967	58.4018	0.476882	-1.0683	down
ko03010	Ribosome	2.02505e-13	MSTRG.1443	HHC001848	K02923	NA	hypothetical protein LR48_Vigan05g203800 [Vigna angularis]	11.5071	7.40828	8.1944	23.3522	20.6396	23.4251	0.402122	-1.31429	down
ko03010	Ribosome	2.02505e-13	MSTRG.14445	HHC014986	K02910	NA	60S ribosomal protein L31 [Asparagus officinalis]	4.09852	2.32844	1.63911	8.47281	7.66118	8.26002	0.330657	-1.59659	down
ko03010	Ribosome	2.02505e-13	MSTRG.14488	HHC015049	K02866	NA	hypothetical protein AQUCO_00201257v1 [Aquilegia coerulea]	522.865	386.781	322.082	1366.72	1389.44	1406.97	0.295866	-1.75698	down
ko03010	Ribosome	2.02505e-13	MSTRG.14663	HHC015289	K02951	NA	40S ribosomal protein S12 [Phoenix dactylifera];40S ribosomal protein S12-like [Asparagus officinalis]	137.105	88.1643	91.4165	219.163	270.815	234.979	0.436834	-1.19484	down
ko03010	Ribosome	2.02505e-13	MSTRG.14857	HHC015558	K02984	NA	40S ribosomal protein S3a-like [Asparagus officinalis]	15.9342	14.8619	11.9034	44.1292	45.2936	46.1221	0.315021	-1.66648	down
ko03010	Ribosome	2.02505e-13	MSTRG.14932	HHC015661	K02956	NA	uncharacterized protein LOC109819493 [Asparagus officinalis]	10.3503	7.21827	11.8233	31.7652	22.0763	20.9116	0.393184	-1.34672	down
ko03010	Ribosome	2.02505e-13	MSTRG.14972	HHC015708	K02948	NA	ribosomal protein S11 (plastid) [Lophiola aurea]	1.87994	7.12063	11.4055	0.379318	0.0001	0.0001	53.7685	5.74869	up
ko03010	Ribosome	2.02505e-13	MSTRG.15014	HHC015762	K02995	NA	40S ribosomal protein S8 [Ananas comosus]	5.61373	3.47045	2.30398	9.66039	7.59823	10.2728	0.413642	-1.27355	down
ko03010	Ribosome	2.02505e-13	MSTRG.1515	HHC001937	K02965	NA	hypothetical protein [Zea mays]	17.1335	10.9189	11.6178	26.5562	28.2702	29.0001	0.473241	-1.07935	down
ko03010	Ribosome	2.02505e-13	MSTRG.15282	HHC016048	K02947	NA	40S ribosomal protein S10-1 [Ananas comosus]	23.542	17.1135	15.5247	40.3203	41.9249	40.7578	0.456739	-1.13056	down
ko03010	Ribosome	2.02505e-13	MSTRG.15348	HHC016148	K02955	NA	hypothetical protein CUMW_005470, partial [Citrus unshiu]	104.629	69.3826	45.4887	203.945	198.201	197.94	0.365781	-1.45095	down
ko03010	Ribosome	2.02505e-13	MSTRG.15403	HHC016223	K02985	NA	40S ribosomal protein S3-3-like [Phoenix dactylifera]	11.6337	8.87845	6.90728	31.3995	28.9901	30.9272	0.300268	-1.73568	down
ko03010	Ribosome	2.02505e-13	MSTRG.15772	HHC016679	K02877	NA	60S ribosomal protein L15-1 [Asparagus officinalis]	422.691	337.682	254.509	960.167	948.138	954.768	0.354473	-1.49625	down
ko03010	Ribosome	2.02505e-13	MSTRG.15830	HHC016756	K02901	NA	60S ribosomal protein L27-3 [Asparagus officinalis]	7.08802	6.39544	4.96473	14.6812	15.4168	15.4098	0.405386	-1.30263	down
ko03010	Ribosome	2.02505e-13	MSTRG.15842	HHC016768	K02921	NA	hypothetical protein CISIN_1g045338mg [Citrus sinensis]	65.5328	43.1754	36.8624	143.484	149.771	143.592	0.33323	-1.58541	down
ko03010	Ribosome	2.02505e-13	MSTRG.15858	HHC016785	K02938	NA	60S ribosomal protein L8-1 [Papaver somniferum]	120.5	87.7425	65.8782	197.444	184.696	191.075	0.478216	-1.06427	down
ko03010	Ribosome	2.02505e-13	MSTRG.15868	HHC016798	K02953	NA	PREDICTED: 40S ribosomal protein S13 [Elaeis guineensis]	184.288	139.281	127.135	481.447	456.357	454.969	0.323602	-1.62771	down
ko03010	Ribosome	2.02505e-13	MSTRG.15981	HHC016964	K02962	NA	40S ribosomal protein S17-like [Asparagus officinalis]	25.3041	19.799	16.5957	45.4929	45.6769	43.5275	0.458055	-1.12641	down
ko03010	Ribosome	2.02505e-13	MSTRG.15988	HHC016970	K02923	NA	60S ribosomal protein L38 [Phoenix dactylifera]	54.9095	38.8728	38.6101	90.2762	99.9455	96.3337	0.462013	-1.11399	down
ko03010	Ribosome	2.02505e-13	MSTRG.16054	HHC017062	K02995	NA	hypothetical protein DVH24_000849 [Malus domestica]	55.0964	44.0139	49.5369	144	139.238	141.219	0.350206	-1.51372	down
ko03010	Ribosome	2.02505e-13	MSTRG.16340	HHC017418	K02964	NA	PREDICTED: 40S ribosomal protein S18-like isoform X1 [Lupinus angustifolius]	28.0497	19.3959	15.9331	45.1003	43.2714	44.4466	0.477183	-1.06739	down
ko03010	Ribosome	2.02505e-13	MSTRG.16394	HHC017493	K02930	NA	hypothetical protein B296_00026414 [Ensete ventricosum]	59.4484	55.2956	36.3347	178.691	173.32	173.04	0.287741	-1.79716	down
ko03010	Ribosome	2.02505e-13	MSTRG.16413	HHC017520	K02958	NA	40S ribosomal protein S15-like isoform X1 [Asparagus officinalis]	63.0858	59.3913	40.9336	135.114	137.513	136.725	0.399194	-1.32484	down
ko03010	Ribosome	2.02505e-13	MSTRG.16563	HHC017753	K02897	NA	PREDICTED: uncharacterized protein LOC105033266 [Elaeis guineensis]	8.4131	7.89618	5.8358	15.8375	15.1193	14.8361	0.483593	-1.04814	down
ko03010	Ribosome	2.02505e-13	MSTRG.16737	HHC017997	K02977	NA	ubiquitin-40S ribosomal protein S27a-like [Solanum tuberosum]	386.016	274.394	236.408	831.885	847.572	840.642	0.355866	-1.49059	down
ko03010	Ribosome	2.02505e-13	MSTRG.16790	HHC018067	K02885	NA	60S ribosomal protein L19-1 [Asparagus officinalis];60S ribosomal protein L19-3 [Asparagus officinalis]	135.212	107.055	115.329	320.006	319.813	311.725	0.375807	-1.41194	down
ko03010	Ribosome	2.02505e-13	MSTRG.16825	HHC018110	K02987	NA	40S ribosomal protein S4-3 [Asparagus officinalis]	81.014	64.4618	50.8659	151.809	152.199	147.976	0.4344	-1.2029	down
ko03010	Ribosome	2.02505e-13	MSTRG.16869	HHC018177	K02934	NA	60S ribosomal protein L6-like [Asparagus officinalis]	89.9551	67.4345	61.5417	195.378	200.904	191.781	0.372293	-1.42549	down
ko03010	Ribosome	2.02505e-13	MSTRG.17036	HHC018375	K02918	NA	60S ribosomal protein L35 [Asparagus officinalis]	40.9609	26.8416	30.0285	88.4984	88.2	88.5483	0.36883	-1.43897	down
ko03010	Ribosome	2.02505e-13	MSTRG.17149	HHC018527	K02960	NA	40S ribosomal protein S16-like [Phoenix dactylifera]	57.235	33.8721	40.4716	86.2036	98.4721	87.115	0.484118	-1.04657	down
ko03010	Ribosome	2.02505e-13	MSTRG.1725	HHC002242	K02896	NA	60S ribosomal protein L24 [Ananas comosus]	126.803	76.447	57.1192	207.637	205.877	210.664	0.417139	-1.2614	down
ko03010	Ribosome	2.02505e-13	MSTRG.17376	HHC018874	K02942	NA	PREDICTED: 60S acidic ribosomal protein P3-like [Nicotiana attenuata]	131.055	91.5504	100.997	229.154	238.479	234.475	0.460902	-1.11747	down
ko03010	Ribosome	2.02505e-13	MSTRG.17491	HHC019040	K02925	NA	60S ribosomal protein L3-like protein [Ornithogalum longebracteatum]	12.3257	10.7265	6.08676	64.9157	64.3767	61.343	0.152852	-2.7098	down
ko03010	Ribosome	2.02505e-13	MSTRG.17577	HHC019164	K02865	NA	PREDICTED: 60S ribosomal protein L10a [Musa acuminata subsp. malaccensis]	88.1675	68.7669	47.9086	161.397	152.059	155.989	0.436351	-1.19644	down
ko03010	Ribosome	2.02505e-13	MSTRG.17590	HHC019182	K02943	NA	60S acidic ribosomal protein P2B-like protein [Cinnamomum micranthum f. kanehirae]	41.0782	35.0673	24.5848	89.6641	83.5695	85.3234	0.389586	-1.35998	down
ko03010	Ribosome	2.02505e-13	MSTRG.17643	HHC019264	K02893	NA	60S ribosomal protein L23A [Asparagus officinalis]	4.17307	0.821365	2.45235	10.0213	12.4267	23.9284	0.160573	-2.6387	down
ko03010	Ribosome	2.02505e-13	MSTRG.17794	HHC019531	K02932	NA	PREDICTED: 60S ribosomal protein L5 [Musa acuminata subsp. malaccensis]	44.0793	44.7531	29.3898	84.4648	82.427	87.1523	0.465361	-1.10358	down
ko03010	Ribosome	2.02505e-13	MSTRG.17982	HHC019861	K02995	NA	PREDICTED: 40S ribosomal protein S8-like [Pyrus x bretschneideri]	283.571	235.103	159.003	885.073	857.036	858.23	0.260611	-1.94003	down
ko03010	Ribosome	2.02505e-13	MSTRG.1805	HHC002350	K02914	NA	uncharacterized protein LOC109823552 [Asparagus officinalis]	1.6212	1.14686	1.27549	3.02927	3.27215	2.98116	0.435607	-1.1989	down
ko03010	Ribosome	2.02505e-13	MSTRG.18088	HHC020083	K02910	NA	60S ribosomal protein L31 [Cinnamomum micranthum f. kanehirae]	3.32141	2.16319	3.37621	6.85019	6.26736	6.47519	0.45225	-1.14481	down
ko03010	Ribosome	2.02505e-13	MSTRG.18158	HHC020244	K02932	NA	PREDICTED: 60S ribosomal protein L5 [Musa acuminata subsp. malaccensis]	5.34975	5.39134	3.40062	11.4424	12.6103	11.5259	0.397478	-1.33105	down
ko03010	Ribosome	2.02505e-13	MSTRG.18177	HHC020269	K02981	NA	uncharacterized protein A4U43_C07F37280 [Asparagus officinalis]	0.157363	0.0614652	0.160281	0.294558	0.394001	0.339407	0.368796	-1.43911	down
ko03010	Ribosome	2.02505e-13	MSTRG.18511	HHC020712	K02985	NA	40S ribosomal protein S3-3-like [Phoenix dactylifera];hypothetical protein EUGRSUZ_C03560 [Eucalyptus grandis];40S ribosomal protein S3-1 isoform X3 [Cinnamomum micranthum f. kanehirae]	143.412	101.597	101.212	295.907	299.891	292.431	0.389788	-1.35924	down
ko03010	Ribosome	2.02505e-13	MSTRG.18695	HHC020947	K02867	NA	uncharacterized protein LOC110100811 [Dendrobium catenatum]	6.75771	8.28087	6.43798	16.0239	15.4229	17.5556	0.438276	-1.19009	down
ko03010	Ribosome	2.02505e-13	MSTRG.18812	HHC021113	K02896	NA	PREDICTED: 60S ribosomal protein L24 [Tarenaya hassleriana]	63.2925	42.2827	41.6625	122.385	119.351	120.591	0.406367	-1.29915	down
ko03010	Ribosome	2.02505e-13	MSTRG.18906	HHC021231	K02877	NA	60S ribosomal protein L15-1 [Asparagus officinalis]	14.8717	9.53581	4.28023	35.5198	35.5714	35.5794	0.268937	-1.89466	down
ko03010	Ribosome	2.02505e-13	MSTRG.18968	HHC021311	K02921	NA	60s ribosomal protein l37a, partial [Nicotiana attenuata]	6.51287	4.35879	3.6378	17.0052	17.0671	17.3503	0.282161	-1.82541	down
ko03010	Ribosome	2.02505e-13	MSTRG.18981	HHC021329	K02938	NA	Ribosomal protein L2 [Macleaya cordata]	20.0584	14.5493	13.3552	44.5873	42.1539	43.7993	0.367418	-1.44451	down
ko03010	Ribosome	2.02505e-13	MSTRG.1898	HHC002476	K02908	NA	60S ribosomal protein L30 [Asparagus officinalis]	23.5524	16.0188	14.234	49.6463	47.8571	47.6185	0.370758	-1.43145	down
ko03010	Ribosome	2.02505e-13	MSTRG.18990	HHC021339	K02969	NA	40S ribosomal protein S20-1 [Ricinus communis];40S ribosomal protein S20-2-like [Phoenix dactylifera]	229.868	116	87.9429	273.919	365.351	365.63	0.431696	-1.21191	down
ko03010	Ribosome	2.02505e-13	MSTRG.18991	HHC021340	K02953	NA	PREDICTED: 40S ribosomal protein S13 [Elaeis guineensis]	20.9328	13.5795	10.0241	36.9701	43.0924	37.1046	0.38011	-1.39551	down
ko03010	Ribosome	2.02505e-13	MSTRG.19156	HHC021572	K02995	NA	40S ribosomal protein S8 [Ananas comosus]	427.892	347.274	308.294	942.513	964.597	957.96	0.378162	-1.40293	down
ko03010	Ribosome	2.02505e-13	MSTRG.19439	HHC021950	K02964	NA	PREDICTED: 40S ribosomal protein S18-like isoform X1 [Lupinus angustifolius]	44.2436	26.1475	29.2479	74.9659	71.4725	73.282	0.453481	-1.14089	down
ko03010	Ribosome	2.02505e-13	MSTRG.19503	HHC022055	K02958	NA	40S ribosomal protein S15-like isoform X1 [Asparagus officinalis]	353.409	275.878	186.256	868.582	858.023	868.111	0.314309	-1.66974	down
ko03010	Ribosome	2.02505e-13	MSTRG.19785	HHC022458	K02906	NA	50S ribosomal protein L3, chloroplastic [Phalaenopsis equestris]	14.3597	10.657	11.328	29.6702	31.6422	29.3015	0.401094	-1.31799	down
ko03010	Ribosome	2.02505e-13	MSTRG.19806	HHC022483	K02977	NA	PREDICTED: ubiquitin-40S ribosomal protein S27a-like [Elaeis guineensis]	105.476	89.2786	80.5179	205.884	210.65	208.004	0.440762	-1.18193	down
ko03010	Ribosome	2.02505e-13	MSTRG.19890	HHC022593	K02987	NA	40S ribosomal protein S4-3 [Ananas comosus]	179.544	124.804	104.877	588.974	574.142	605.589	0.23137	-2.11173	down
ko03010	Ribosome	2.02505e-13	MSTRG.19933	HHC022655	K02934	NA	60S ribosomal protein L6-like [Asparagus officinalis]	962.886	902.891	649.158	1761.59	1792.62	1822.58	0.46774	-1.09622	down
ko03010	Ribosome	2.02505e-13	MSTRG.20019	HHC022767	K02908	NA	60S ribosomal protein L30 [Asparagus officinalis]	117.361	74.9607	66.2676	230.937	223.876	226.427	0.379587	-1.3975	down
ko03010	Ribosome	2.02505e-13	MSTRG.20271	HHC023116	K02910	NA	60S ribosomal protein L31 [Asparagus officinalis]	23.2446	13.8724	12.208	49.5046	43.9182	78.8347	0.286344	-1.80418	down
ko03010	Ribosome	2.02505e-13	MSTRG.2031	HHC002675	K02910	NA	60S ribosomal protein L31 [Asparagus officinalis]	8.07344	5.68701	9.30125	1.8038	1.62225	1.56973	4.61624	2.20672	up
ko03010	Ribosome	2.02505e-13	MSTRG.20627	HHC023593	K02865	NA	PREDICTED: 60S ribosomal protein L10a [Musa acuminata subsp. malaccensis]	516.897	425.374	338.222	862.508	865.735	840.835	0.498425	-1.00455	down
ko03010	Ribosome	2.02505e-13	MSTRG.20637	HHC023613	K02943	NA	60S acidic ribosomal protein P2B-like protein [Cinnamomum micranthum f. kanehirae]	153.833	120.531	105.116	255.541	265.493	263.704	0.483575	-1.04819	down
ko03010	Ribosome	2.02505e-13	MSTRG.20716	HHC023748	K02936	NA	60S ribosomal protein L7a-1-like [Asparagus officinalis]	91.5409	58.4768	53.3673	315.917	313.519	313.947	0.215591	-2.21363	down
ko03010	Ribosome	2.02505e-13	MSTRG.20747	HHC023807	K02989	NA	40S ribosomal protein S5-like [Asparagus officinalis]	23.652	14.3645	9.71721	82.3501	76.9632	79.7889	0.199637	-2.32455	down
ko03010	Ribosome	2.02505e-13	MSTRG.20799	HHC023890	K02912	NA	60S ribosomal protein L32-1 [Asparagus officinalis]	70.4205	41.2346	44.9185	129.222	125.805	124.701	0.412331	-1.27813	down
ko03010	Ribosome	2.02505e-13	MSTRG.20819	HHC023924	K02987	NA	BTB/POZ and TAZ domain-containing protein 3 isoform X2 [Asparagus officinalis]	14.3352	13.5048	11.0908	5.45226	5.49148	5.7675	2.32962	1.22009	up
ko03010	Ribosome	2.02505e-13	MSTRG.20826	HHC023939	K02932	NA	PREDICTED: 60S ribosomal protein L5 [Pyrus x bretschneideri]	378.902	323.337	216.159	1306.13	1292.85	1273.13	0.237182	-2.07593	down
ko03010	Ribosome	2.02505e-13	MSTRG.20903	HHC024075	K02989	NA	40S ribosomal protein S5-like [Asparagus officinalis]	23.9226	16.544	11.2088	57.2473	63.6991	59.1002	0.287012	-1.80082	down
ko03010	Ribosome	2.02505e-13	MSTRG.21043	HHC024300	K02962	NA	40S ribosomal protein S17-like [Phoenix dactylifera]	84.9188	65.2127	59.8652	153.216	153.032	155.242	0.455041	-1.13593	down
ko03010	Ribosome	2.02505e-13	MSTRG.21503	HHC025080	K02949	NA	40S ribosomal protein S11 [Asparagus officinalis]	29.4425	22.0584	18.3649	74.6989	80.0267	75.5939	0.303343	-1.72098	down
ko03010	Ribosome	2.02505e-13	MSTRG.21559	HHC025152	K02955	NA	40S ribosomal protein S14-3 [Zea mays]	64.2988	47.6681	32.0178	141.466	148.709	149.144	0.327745	-1.60935	down
ko03010	Ribosome	2.02505e-13	MSTRG.21583	HHC025186	K02993	NA	40S ribosomal protein S7-like [Asparagus officinalis]	83.1465	62.7	46.6433	151.158	147.83	150.117	0.428608	-1.22227	down
ko03010	Ribosome	2.02505e-13	MSTRG.21656	HHC025289	K02998	NA	PREDICTED: 40S ribosomal protein SA [Elaeis guineensis]	126.548	117.927	60.2072	394.156	407.21	396.434	0.254368	-1.97501	down
ko03010	Ribosome	2.02505e-13	MSTRG.21980	HHC025749	K02991	NA	40S ribosomal protein S6 [Hevea brasiliensis]	72.0597	54.056	42.294	213.723	201.674	213.257	0.267889	-1.90029	down
ko03010	Ribosome	2.02505e-13	MSTRG.22001	HHC025779	K02904	NA	50S ribosomal protein L29, chloroplastic [Asparagus officinalis]	1.04173	0.953852	0.354193	2.57529	2.2132	2.76158	0.311226	-1.68396	down
ko03010	Ribosome	2.02505e-13	MSTRG.22218	HHC026201	K02985	NA	40S ribosomal protein S3-3-like [Asparagus officinalis]	100.24	73.548	88.8501	226.229	230.512	215.616	0.390623	-1.35615	down
ko03010	Ribosome	2.02505e-13	MSTRG.22310	HHC026409	K02882	NA	60S ribosomal protein L18a [Asparagus officinalis]	10.6323	7.67621	7.80985	19.6078	19.0269	20.0751	0.444873	-1.16854	down
ko03010	Ribosome	2.02505e-13	MSTRG.22329	HHC026442	K02940	NA	60S ribosomal protein L9 [Asparagus officinalis]	558.196	383.156	348.554	1062.09	1046.92	1087.86	0.40349	-1.30939	down
ko03010	Ribosome	2.02505e-13	MSTRG.22536	HHC026829	K02980	NA	40S ribosomal protein S29-like [Ziziphus jujuba]	497.564	332.667	282.797	1111.39	1125.2	1093.35	0.334248	-1.58101	down
ko03010	Ribosome	2.02505e-13	MSTRG.22596	HHC026935	K02966	NA	40S ribosomal protein S19-like [Asparagus officinalis]	165.952	118.346	110.952	302.264	290.407	288.61	0.448495	-1.15684	down
ko03010	Ribosome	2.02505e-13	MSTRG.22675	HHC027067	K02942	NA	PREDICTED: probable 18S rRNA (guanine-N(7))-methyltransferase isoform X1 [Elaeis guineensis]	1.36568	0.708769	1.62057	0.662187	0.56954	0.575335	2.04476	1.03193	up
ko03010	Ribosome	2.02505e-13	MSTRG.22811	HHC027272	K02883	NA	60S ribosomal protein L18-3 [Asparagus officinalis]	1089.26	646.954	456.074	3119.4	3100.25	3131.64	0.234437	-2.09273	down
ko03010	Ribosome	2.02505e-13	MSTRG.22885	HHC027356	K02964	NA	hypothetical protein PRUPE_8G238900 [Prunus persica]	162.437	103.984	90.0055	425.224	409.098	421.874	0.283735	-1.81738	down
ko03010	Ribosome	2.02505e-13	MSTRG.23185	HHC027807	K02991	NA	PREDICTED: 40S ribosomal protein S6-like [Musa acuminata subsp. malaccensis]	85.8038	66.1485	69.5337	219.047	214.092	219.401	0.339421	-1.55885	down
ko03010	Ribosome	2.02505e-13	MSTRG.23336	HHC028023	K02989	NA	40S ribosomal protein S5 [Cinnamomum micranthum f. kanehirae]	1026.54	713.085	627.349	1954.46	1979.4	1950.42	0.402254	-1.31382	down
ko03010	Ribosome	2.02505e-13	MSTRG.2349	HHC003158	K02921	NA	hypothetical protein CISIN_1g045338mg [Citrus sinensis]	98.6702	67.7947	56.4416	187.413	176.909	187.602	0.403872	-1.30803	down
ko03010	Ribosome	2.02505e-13	MSTRG.23508	HHC028248	K02868	NA	PREDICTED: 60S ribosomal protein L11 [Pyrus x bretschneideri]	346.943	257.544	221.739	653.269	633.488	652.872	0.425971	-1.23117	down
ko03010	Ribosome	2.02505e-13	MSTRG.23641	HHC028443	K02898	NA	60S ribosomal protein L26-2-like protein [Cinnamomum micranthum f. kanehirae]	96.2516	66.5192	49.4027	160.47	151.253	150.679	0.458851	-1.1239	down
ko03010	Ribosome	2.02505e-13	MSTRG.23904	HHC028767	K02990	NA	uncharacterized protein LOC109825306 [Asparagus officinalis]	14.3295	11.8148	12.2762	39.7405	37.4736	34.1902	0.344875	-1.53585	down
ko03010	Ribosome	2.02505e-13	MSTRG.24068	HHC028995	K02975	NA	hypothetical protein SORBI_3003G322532 [Sorghum bicolor]	53.4521	40.9967	39.3185	180.159	164.974	166.47	0.261467	-1.9353	down
ko03010	Ribosome	2.02505e-13	MSTRG.2410	HHC003246	K02941	NA	PREDICTED: 60S acidic ribosomal protein P0-like [Musa acuminata subsp. malaccensis]	342.362	228.85	164.388	1363.61	1305.53	1324.02	0.184215	-2.44054	down
ko03010	Ribosome	2.02505e-13	MSTRG.24121	HHC029083	K02947	NA	PREDICTED: 40S ribosomal protein S10-1-like [Musa acuminata subsp. malaccensis]	509.94	382.588	270.764	1064.72	1040.88	1041.53	0.369636	-1.43582	down
ko03010	Ribosome	2.02505e-13	MSTRG.24147	HHC029113	K02935	NA	uncharacterized protein LOC109825998 [Asparagus officinalis]	8.13559	5.95425	5.67433	27.4919	23.3754	26.698	0.254807	-1.97252	down
ko03010	Ribosome	2.02505e-13	MSTRG.24416	HHC029462	K02912	NA	60S ribosomal protein L32-1, partial [Ananas comosus]	32.284	14.3834	17.9368	58.4504	56.2848	56.2574	0.377819	-1.40423	down
ko03010	Ribosome	2.02505e-13	MSTRG.2444	HHC003292	K02917	NA	probable sugar phosphate/phosphate translocator At3g11320 [Manihot esculenta];ribosomal protein L33 [Castanea sativa]	200.034	112.371	107.934	346.037	341.101	352.002	0.404506	-1.30577	down
ko03010	Ribosome	2.02505e-13	MSTRG.24506	HHC029578	K02880	NA	60S ribosomal protein L17-like [Asparagus officinalis]	199.387	159.284	106.461	315.637	308.231	312.799	0.496582	-1.0099	down
ko03010	Ribosome	2.02505e-13	MSTRG.24554	HHC029638	K02929	NA	60S ribosomal protein L36a [Brachypodium distachyon]	55.6643	39.585	29.0375	105.173	99.7826	105.729	0.400041	-1.32178	down
ko03010	Ribosome	2.02505e-13	MSTRG.24593	HHC029680	K02983	NA	hypothetical protein MIMGU_mgv1a016770mg [Erythranthe guttata]	32.902	19.7275	20.978	55.9144	62.1647	56.8624	0.420755	-1.24895	down
ko03010	Ribosome	2.02505e-13	MSTRG.24607	HHC029697	K02938	NA	60S ribosomal protein L8-1 [Papaver somniferum]	333.658	279.013	217.785	705.988	705.282	688.13	0.395568	-1.338	down
ko03010	Ribosome	2.02505e-13	MSTRG.25075	HHC030378	K02981	NA	40S ribosomal protein S2-4 [Populus trichocarpa]	29.1216	23.9662	16.9088	96.788	90.3175	94.7649	0.248329	-2.00968	down
ko03010	Ribosome	2.02505e-13	MSTRG.2528	HHC003438	K02996	NA	28S ribosomal protein S9, mitochondrial [Asparagus officinalis]	3.7242	4.74688	4.64826	12.0179	11.73	12.8425	0.358546	-1.47977	down
ko03010	Ribosome	2.02505e-13	MSTRG.25725	HHC031511	K02921	NA	60S ribosomal protein L37a [Capsicum chinense]	7.29397	3.53732	3.48785	15.1975	13.9213	8.64707	0.379156	-1.39914	down
ko03010	Ribosome	2.02505e-13	MSTRG.26018	HHC032022	K02974	NA	40S ribosomal protein S24-1 [Ananas comosus]	18.2808	12.7171	10.1973	31.4463	30.9527	31.1476	0.440371	-1.18321	down
ko03010	Ribosome	2.02505e-13	MSTRG.26234	HHC032393	K02998	NA	PREDICTED: 40S ribosomal protein SA [Elaeis guineensis]	263.662	268.087	182.667	591.215	583.016	568.32	0.409983	-1.28636	down
ko03010	Ribosome	2.02505e-13	MSTRG.26264	HHC032437	K02900	NA	Ribosomal protein L18e/L15P [Corchorus olitorius]	106.642	71.309	52.4524	206.376	198.197	203.22	0.379082	-1.39942	down
ko03010	Ribosome	2.02505e-13	MSTRG.2664	HHC003659	K02973	NA	uncharacterized protein A4U43_C07F3660 [Asparagus officinalis];40S ribosomal protein S23 [Phalaenopsis equestris]	199.128	149.976	139.443	335.296	338.819	342.302	0.480656	-1.05692	down
ko03010	Ribosome	2.02505e-13	MSTRG.26925	HHC033432	K02916	NA	50S ribosomal protein L35, chloroplastic [Asparagus officinalis]	5.20131	2.94471	3.85833	8.91148	7.72465	8.6159	0.475382	-1.07284	down
ko03010	Ribosome	2.02505e-13	MSTRG.27591	HHC034604	K02910	NA	60S ribosomal protein L31 [Asparagus officinalis]	5.37786	2.02122	3.86023	9.9222	9.40645	9.40995	0.391784	-1.35187	down
ko03010	Ribosome	2.02505e-13	MSTRG.27669	HHC034738	K02907	NA	uncharacterized protein LOC103703818 isoform X1 [Phoenix dactylifera]	21.7492	20.3432	19.0813	52.1673	49.3171	51.566	0.399697	-1.32302	down
ko03010	Ribosome	2.02505e-13	MSTRG.27762	HHC034891	K02894	NA	hypothetical protein Ccrd_003660 [Cynara cardunculus var. scolymus]	585.743	380.978	335.078	1102.19	1122.14	1111.94	0.390195	-1.35773	down
ko03010	Ribosome	2.02505e-13	MSTRG.27833	HHC035003	K02937	NA	60S ribosomal protein L7-2-like [Asparagus officinalis]	270.295	235.346	172.579	460.467	477.223	588.78	0.444306	-1.17038	down
ko03010	Ribosome	2.02505e-13	MSTRG.27847	HHC035014	K02959	NA	30S ribosomal protein S16-2, chloroplastic/mitochondrial-like [Asparagus officinalis]	6.86506	7.82889	6.58084	14.8969	17.1994	17.4627	0.429282	-1.22	down
ko03010	Ribosome	2.02505e-13	MSTRG.27877	HHC035058	K02978	NA	PREDICTED: 40S ribosomal protein S27-2 [Nelumbo nucifera]	175.843	119.774	106.814	340.018	328.25	329.878	0.403178	-1.31051	down
ko03010	Ribosome	2.02505e-13	MSTRG.27933	HHC035140	K02932	NA	hypothetical protein CCACVL1_23003 [Corchorus capsularis]	48.3169	45.427	31.5217	142.662	144.214	139.853	0.293549	-1.76833	down
ko03010	Ribosome	2.02505e-13	MSTRG.27934	HHC035144	K02937	NA	60S ribosomal protein L7-1-like [Asparagus officinalis]	33.8238	24.055	24.0994	71.8869	71.6789	72.5762	0.37928	-1.39867	down
ko03010	Ribosome	2.02505e-13	MSTRG.28002	HHC035240	K02873	NA	60S ribosomal protein L13-1-like isoform X1 [Asparagus officinalis]	424.615	342.991	215.267	1115.41	1121.91	1065.51	0.297586	-1.74862	down
ko03010	Ribosome	2.02505e-13	MSTRG.28039	HHC035290	K02943	NA	PREDICTED: 60S acidic ribosomal protein P2B [Elaeis guineensis]	49.8422	32.5499	24.0495	123.71	126.132	122.25	0.286062	-1.8056	down
ko03010	Ribosome	2.02505e-13	MSTRG.28059	HHC035308	K02865	NA	uncharacterized protein LOC109836756 [Asparagus officinalis]	13.2571	13.1164	22.8203	8.70282	7.7642	7.39856	2.06129	1.04355	up
ko03010	Ribosome	2.02505e-13	MSTRG.28085	HHC035348	K02927	NA	hypothetical protein MIMGU_mgv1a015002mg [Erythranthe guttata]	26.6083	17.8332	16.8528	54.6374	54.8477	55.0018	0.37264	-1.42415	down
ko03010	Ribosome	2.02505e-13	MSTRG.28086	HHC035349	K02955	NA	hypothetical protein C2845_PM15G07720 [Panicum miliaceum]	61.8778	43.9263	41.0254	112.714	111.832	112.754	0.435308	-1.19989	down
ko03010	Ribosome	2.02505e-13	MSTRG.28113	HHC035387	K02876	NA	uncharacterized protein LOC109836890 [Asparagus officinalis]	20.7499	13.8317	17.5265	47.3299	45.2964	48.5026	0.369224	-1.43743	down
ko03010	Ribosome	2.02505e-13	MSTRG.28131	HHC035411	K02912	NA	60S ribosomal protein L32-1, partial [Ananas comosus]	120.904	116.887	84.8798	269.432	253.549	272.662	0.405548	-1.30206	down
ko03010	Ribosome	2.02505e-13	MSTRG.2814	HHC003916	K02976	NA	40S ribosomal protein S26-2 [Amborella trichopoda]	290.877	199.559	147.271	709.021	696.279	706.117	0.302028	-1.72725	down
ko03010	Ribosome	2.02505e-13	MSTRG.28182	HHC035479	K02953	NA	PREDICTED: 40S ribosomal protein S13 [Elaeis guineensis]	154.766	112.997	99.047	305.535	319.46	321.304	0.387626	-1.36726	down
ko03010	Ribosome	2.02505e-13	MSTRG.28192	HHC035492	K02942	NA	PREDICTED: 60S acidic ribosomal protein P1 [Elaeis guineensis]	33.5353	25.6718	19.2052	64.062	60.6145	64.551	0.414381	-1.27097	down
ko03010	Ribosome	2.02505e-13	MSTRG.28451	HHC035837	K02882	NA	60S ribosomal protein L18a [Asparagus officinalis]	15.1784	12.6963	21.8652	4.63898	3.93161	4.94959	3.67894	1.87929	up
ko03010	Ribosome	2.02505e-13	MSTRG.28456	HHC035842	K02894	NA	PREDICTED: 60S ribosomal protein L23 [Nicotiana tomentosiformis]	155.185	124.703	99.5937	301.478	307.048	291.699	0.421542	-1.24625	down
ko03010	Ribosome	2.02505e-13	MSTRG.28458	HHC035843	K02866	NA	acid phosphatase 1-like isoform X2 [Asparagus officinalis]	14.6851	11.3642	0.795328	97.1392	94.3272	99.5374	0.0922483	-3.43833	down
ko03010	Ribosome	2.02505e-13	MSTRG.28465	HHC035852	K02917	NA	ribosomal protein L33 [Castanea sativa]	107.442	73.5899	65.4692	217.776	227.121	222.682	0.369247	-1.43734	down
ko03010	Ribosome	2.02505e-13	MSTRG.28486	HHC035885	K02875	NA	PREDICTED: 60S ribosomal protein L14-1-like [Musa acuminata subsp. malaccensis]	97.6598	61.9483	61.0666	220.123	219.955	222.472	0.333069	-1.58611	down
ko03010	Ribosome	2.02505e-13	MSTRG.28876	HHC036444	K02895	NA	uncharacterized protein LOC109836457 [Asparagus officinalis]	3.12402	1.96006	1.6871	4.04694	19.7014	17.8202	0.162892	-2.61801	down
ko03010	Ribosome	2.02505e-13	MSTRG.28895	HHC036468	K02882	NA	aspartyl protease family protein 2-like [Momordica charantia]	157.197	104.242	80.8059	316.309	308.825	321.595	0.361503	-1.46792	down
ko03010	Ribosome	2.02505e-13	MSTRG.28897	HHC036463	K02889	NA	60S ribosomal protein L21-1 [Ananas comosus]	248.623	215.466	156.677	542.22	528.886	516.403	0.391031	-1.35464	down
ko03010	Ribosome	2.02505e-13	MSTRG.29015	HHC036614	K02946	NA	uncharacterized protein LOC109819958 [Asparagus officinalis]	14.9905	12.5201	12.1016	45.6272	46.1304	42.9589	0.294041	-1.76591	down
ko03010	Ribosome	2.02505e-13	MSTRG.29052	HHC036667	K02984	NA	40S ribosomal protein S3a-2 [Phalaenopsis equestris]	132.491	105.969	97.452	245.403	247.665	249.481	0.452378	-1.1444	down
ko03010	Ribosome	2.02505e-13	MSTRG.29091	HHC036723	K02980	NA	40S ribosomal protein S29 [Glycine soja]	133.728	75.2313	98.1012	220.979	222.509	236.423	0.45162	-1.14682	down
ko03010	Ribosome	2.02505e-13	MSTRG.29180	HHC036828	K02872	NA	60S ribosomal protein L13a-4 [Asparagus officinalis]	127.767	106.096	87.8408	224.209	231.633	225.193	0.472374	-1.082	down
ko03010	Ribosome	2.02505e-13	MSTRG.29244	HHC036898	K02933	NA	uncharacterized protein LOC109712173 [Ananas comosus]	28.06	24.3352	14.2912	58.4735	56.9108	52.4519	0.39733	-1.33159	down
ko03010	Ribosome	2.02505e-13	MSTRG.29386	HHC037131	K02976	NA	uncharacterized protein A4U43_C05F5420 [Asparagus officinalis]	255.31	230.359	201.926	539.892	521.237	498.896	0.440759	-1.18194	down
ko03010	Ribosome	2.02505e-13	MSTRG.29454	HHC037249	K02973	NA	hypothetical protein Ccrd_007484, partial [Cynara cardunculus var. scolymus]	215.13	182.742	157.617	532.935	537.986	526.508	0.347739	-1.52392	down
ko03010	Ribosome	2.02505e-13	MSTRG.2951	HHC004137	K02865	NA	PREDICTED: uncharacterized protein LOC105032977 [Elaeis guineensis]	112.824	97.2496	166.674	57.8655	53.9151	53.7685	2.27574	1.18634	up
ko03010	Ribosome	2.02505e-13	MSTRG.30016	HHC038131	K02981	NA	PREDICTED: 40S ribosomal protein S2-1-like [Fragaria vesca subsp. vesca]	168.275	153.203	125.96	471.628	473.263	473.067	0.31555	-1.66406	down
ko03010	Ribosome	2.02505e-13	MSTRG.30138	HHC038356	K02900	NA	hypothetical protein GOBAR_AA02558 [Gossypium barbadense]	97.9494	63.7148	59.145	197.246	191.484	199.166	0.375592	-1.41276	down
ko03010	Ribosome	2.02505e-13	MSTRG.30166	HHC038399	K02998	NA	PREDICTED: 40S ribosomal protein SA [Elaeis guineensis]	266.795	305.389	194.174	842.306	801.338	818.745	0.311225	-1.68397	down
ko03010	Ribosome	2.02505e-13	MSTRG.30433	HHC038804	K02974	NA	40S ribosomal protein S24-1-like isoform X1 [Ananas comosus]	62.6833	53.807	49.9423	125.893	122.264	124.18	0.446994	-1.16167	down
ko03010	Ribosome	2.02505e-13	MSTRG.30457	HHC038841	K02877	NA	60S ribosomal protein L15-1 [Asparagus officinalis]	115.039	81.8066	71.0337	129.406	204.602	211.848	0.490752	-1.02694	down
ko03010	Ribosome	2.02505e-13	MSTRG.30539	HHC038969	K02940	NA	60S ribosomal protein L9 [Asparagus officinalis]	79.974	47.5748	39.3166	146.817	142.775	144.211	0.384656	-1.37836	down
ko03010	Ribosome	2.02505e-13	MSTRG.30677	HHC039151	K02865	NA	60S ribosomal protein L10a-like [Dendrobium catenatum]	103.94	75.9544	76.8257	194.874	305.746	199.852	0.366496	-1.44813	down
ko03010	Ribosome	2.02505e-13	MSTRG.31007	HHC039594	K02915	NA	uncharacterized protein A4U43_C03F16920 [Asparagus officinalis]	390.726	262.583	262.182	635.625	633.163	624.793	0.48347	-1.0485	down
ko03010	Ribosome	2.02505e-13	MSTRG.31125	HHC039737	K02904	NA	50S ribosomal protein L29, chloroplastic [Asparagus officinalis]	18.2103	7.78344	9.74737	25.1606	28.4874	22.1428	0.471575	-1.08444	down
ko03010	Ribosome	2.02505e-13	MSTRG.31164	HHC039785	K02991	NA	40S ribosomal protein S6 [Hevea brasiliensis]	224.975	168.969	157.517	554.478	559.091	552.706	0.330955	-1.59529	down
ko03010	Ribosome	2.02505e-13	MSTRG.31344	HHC040027	K02880	NA	PREDICTED: 60S ribosomal protein L17 [Oryza brachyantha]	124.238	84.5548	82.6481	310.336	301.09	305.037	0.318006	-1.65287	down
ko03010	Ribosome	2.02505e-13	MSTRG.31402	HHC040104	K02903	NA	60S ribosomal protein L28-1-like [Asparagus officinalis]	217.37	148.993	143.737	361.665	384.552	393.107	0.447721	-1.15933	down
ko03010	Ribosome	2.02505e-13	MSTRG.31557	HHC040303	K02993	NA	40S ribosomal protein S7-like [Asparagus officinalis]	172.577	148.991	91.3908	390.206	368.83	357.968	0.369703	-1.43556	down
ko03010	Ribosome	2.02505e-13	MSTRG.31590	HHC040344	K02955	NA	hypothetical protein CUMW_005470, partial [Citrus unshiu]	77.3347	54.4661	47.5084	244.176	244.288	243.358	0.245017	-2.02905	down
ko03010	Ribosome	2.02505e-13	MSTRG.31705	HHC040437	K02949	NA	40S ribosomal protein S11 [Asparagus officinalis]	69.3627	42.3167	47.6513	129.331	126.97	122.568	0.420543	-1.24967	down
ko03010	Ribosome	2.02505e-13	MSTRG.31836	HHC050694	K02957	NA	PREDICTED: 40S ribosomal protein S15a [Vigna angularis]	18.9544	11.149	12.9199	34.9153	31.9015	33.379	0.429392	-1.21963	down
ko03010	Ribosome	2.02505e-13	MSTRG.32223	HHC047790	K02935	NA	PREDICTED: 50S ribosomal protein L12, chloroplastic-like [Elaeis guineensis]	11.93	5.83371	8.93323	28.3509	27.8079	27.1423	0.320487	-1.64166	down
ko03010	Ribosome	2.02505e-13	MSTRG.32266	HHC048442	K02863	NA	50S ribosomal protein L1, chloroplastic [Apostasia shenzhenica]	3.8165	3.60328	3.30889	11.6255	11.7725	13.9661	0.287138	-1.80018	down
ko03010	Ribosome	2.02505e-13	MSTRG.32337	HHC051216	K02898	NA	hypothetical protein BHE74_00054555 [Ensete ventricosum]	94.1927	66.5492	85.4031	160.229	194.394	194.714	0.448077	-1.15818	down
ko03010	Ribosome	2.02505e-13	MSTRG.32450	HHC047930	K02918	NA	60S ribosomal protein L35-like [Sesamum indicum]	17.2234	9.82574	9.46662	35.1383	32.299	31.0605	0.370727	-1.43157	down
ko03010	Ribosome	2.02505e-13	MSTRG.32579	HHC053161	K02941	NA	PREDICTED: 60S acidic ribosomal protein P0 [Elaeis guineensis]	825.91	858.492	918.526	1791.3	1799.57	1805.5	0.482348	-1.05185	down
ko03010	Ribosome	2.02505e-13	MSTRG.32645	HHC052846	K02949	NA	40S ribosomal protein S11 [Asparagus officinalis]	59.4954	68.6462	64.2581	237.238	249.826	223.371	0.27082	-1.8846	down
ko03010	Ribosome	2.02505e-13	MSTRG.32733	HHC048473	K02912	NA	60S ribosomal protein L32-1, partial [Ananas comosus]	4.92981	4.64878	4.13704	10.0536	8.58551	11.1365	0.460633	-1.11831	down
ko03010	Ribosome	2.02505e-13	MSTRG.32778	HHC048712	K02920	NA	60S ribosomal protein L36-3-like [Phalaenopsis equestris]	81.0253	65.2755	65.1187	160.192	174.187	153.337	0.433489	-1.20593	down
ko03010	Ribosome	2.02505e-13	MSTRG.32831	HHC052838	K02973	NA	unnamed protein product [Coffea canephora]	110.31	67.7557	100.991	205.339	199.534	197.891	0.462961	-1.11104	down
ko03010	Ribosome	2.02505e-13	MSTRG.33007	HHC047407	K02956	NA	uncharacterized protein LOC110115200 [Dendrobium catenatum]	3.4568	2.61206	3.10884	9.7197	9.46248	5.34689	0.374156	-1.41829	down
ko03010	Ribosome	2.02505e-13	MSTRG.33019	HHC054022	K02939	NA	PREDICTED: uncharacterized protein LOC105054729 [Elaeis guineensis]	27.8875	30.5615	17.7159	57.3491	51.1439	59.3609	0.453757	-1.14001	down
ko03010	Ribosome	2.02505e-13	MSTRG.33021	HHC054024	K02939	NA	PREDICTED: uncharacterized protein LOC105054729 [Elaeis guineensis]	0.835226	1.61851	1.22539	5.05518	3.85162	3.93318	0.286536	-1.80321	down
ko03010	Ribosome	2.02505e-13	MSTRG.33160	HHC052743	K02985	NA	40S ribosomal protein S3-3-like [Asparagus officinalis]	108.709	81.2683	67.1383	283.311	282.976	179.407	0.3448	-1.53617	down
ko03010	Ribosome	2.02505e-13	MSTRG.33239	HHC052191	K02960	NA	40S ribosomal protein S16-like [Phoenix dactylifera]	270.395	203.678	160.21	779.849	736.667	778.278	0.276401	-1.85517	down
ko03010	Ribosome	2.02505e-13	MSTRG.33281	HHC051046	K02925	NA	60S ribosomal protein L3-like protein [Ornithogalum longebracteatum]	12.802	8.91253	5.55042	51.4109	50.0618	49.4563	0.180647	-2.46875	down
ko03010	Ribosome	2.02505e-13	MSTRG.33303	HHC048842	K02943	NA	60s acidic ribosomal protein [Hyacinthus orientalis]	246.651	181.275	142.983	482.964	576.354	577.609	0.348769	-1.51966	down
ko03010	Ribosome	2.02505e-13	MSTRG.33340	HHC053544	K02893	NA	60S ribosomal protein L23A [Asparagus officinalis]	20.0624	16.1512	7.51068	99.0903	94.5649	72.6683	0.164177	-2.60667	down
ko03010	Ribosome	2.02505e-13	MSTRG.33344	HHC053071	K02936	NA	60S ribosomal protein L7a-1-like [Asparagus officinalis]	10.3227	8.96164	10.8264	27.2211	28.2513	26.4627	0.367494	-1.44421	down
ko03010	Ribosome	2.02505e-13	MSTRG.33467	HHC052983	K02877	NA	60S ribosomal protein L15-1 [Asparagus officinalis]	67.446	40.4831	39.1397	153.782	152.08	146.394	0.325189	-1.62065	down
ko03010	Ribosome	2.02505e-13	MSTRG.33506	HHC054040	K02930	NA	hypothetical protein B296_00026414 [Ensete ventricosum]	22.1379	21.4195	16.2813	68.393	69.4968	67.3089	0.291613	-1.77787	down
ko03010	Ribosome	2.02505e-13	MSTRG.33510	HHC054044	K02930	NA	hypothetical protein B296_00026414 [Ensete ventricosum]	61.4295	49.8448	41.6104	165.494	164.58	164.276	0.309263	-1.69309	down
ko03010	Ribosome	2.02505e-13	MSTRG.34211	HHC049243	K02912	NA	60S ribosomal protein L32-1-like [Asparagus officinalis]	38.9496	20.038	19.2264	63.7138	66.134	63.1913	0.405172	-1.3034	down
ko03010	Ribosome	2.02505e-13	MSTRG.34295	HHC053040	K02981	NA	40S ribosomal protein S2-4 [Populus trichocarpa]	150.455	110.391	84.9992	548.768	531.369	527.928	0.215069	-2.21713	down
ko03010	Ribosome	2.02505e-13	MSTRG.34407	HHC050589	K02974	NA	40S ribosomal protein S24-1 [Dendrobium catenatum]	227.722	179.226	119.47	499.967	502.958	524.108	0.344733	-1.53645	down
ko03010	Ribosome	2.02505e-13	MSTRG.34492	HHC054097	K02901	NA	60S ribosomal protein L27-3 [Asparagus officinalis]	376.12	278.814	243.985	700.365	693.303	699.508	0.429452	-1.21943	down
ko03010	Ribosome	2.02505e-13	MSTRG.34584	HHC054105	K02981	NA	PREDICTED: 40S ribosomal protein S2-1-like [Fragaria vesca subsp. vesca]	270.808	214.226	167.248	651.671	655.375	645.89	0.334001	-1.58208	down
ko03010	Ribosome	2.02505e-13	MSTRG.3472	HHC005128	K02870	NA	hypothetical protein B296_00056354, partial [Ensete ventricosum]	47.666	33.0999	35.0825	97.9938	100.757	94.2605	0.395372	-1.33872	down
ko03010	Ribosome	2.02505e-13	MSTRG.34748	HHC054116	K02865	NA	60S ribosomal protein L10a-like [Dendrobium catenatum]	23.6588	34.9209	13.7433	135.208	25.9685	145.596	0.235754	-2.08464	down
ko03010	Ribosome	2.02505e-13	MSTRG.35005	HHC051818	K02966	NA	40S ribosomal protein S19-like [Ananas comosus]	77.9073	51.1595	48.5697	140.318	140.492	136.288	0.425886	-1.23146	down
ko03010	Ribosome	2.02505e-13	MSTRG.35087	HHC054127	K02986	NA	hypothetical protein F383_09920 [Gossypium arboreum]	19.6902	12.5675	17.2486	40.0299	38.5626	41.547	0.412074	-1.27903	down
ko03010	Ribosome	2.02505e-13	MSTRG.35204	HHC050750	K02896	NA	Ribosome biogenesis protein [Actinidia chinensis var. chinensis]	18.6603	16.4803	13.1574	38.3301	41.1583	44.4094	0.389821	-1.35911	down
ko03010	Ribosome	2.02505e-13	MSTRG.35236	HHC048793	K02975	NA	40S ribosomal protein S25-2 [Panicum hallii]	36.7457	21.61	23.155	58.1473	58.558	69.6355	0.437428	-1.19288	down
ko03010	Ribosome	2.02505e-13	MSTRG.35284	HHC050149	K02947	NA	PREDICTED: 40S ribosomal protein S10-1 [Elaeis guineensis]	294.807	246.3	185.532	587.666	612.601	574.958	0.409322	-1.28869	down
ko03010	Ribosome	2.02505e-13	MSTRG.35448	HHC053101	K02951	NA	40S ribosomal protein S12-like [Asparagus officinalis]	0.404663	0.231797	0.237773	2.09774	1.69448	1.77345	0.157076	-2.67047	down
ko03010	Ribosome	2.02505e-13	MSTRG.35528	HHC048297	K02937	NA	PREDICTED: 60S ribosomal protein L7-2-like [Musa acuminata subsp. malaccensis]	18.4171	9.41867	194.086	362.709	411.937	451.691	0.180963	-2.46623	down
ko03010	Ribosome	2.02505e-13	MSTRG.35574	HHC051876	K02978	NA	hypothetical protein B296_00013357, partial [Ensete ventricosum]	183.729	156.192	127.463	353.326	342.577	345.055	0.448994	-1.15523	down
ko03010	Ribosome	2.02505e-13	MSTRG.35646	HHC049116	K02893	NA	60S ribosomal protein L23A [Asparagus officinalis]	171.008	106.64	73.8788	288.493	296.986	339.974	0.379844	-1.39652	down
ko03010	Ribosome	2.02505e-13	MSTRG.35683	HHC048373	K02990	NA	uncharacterized protein LOC109825306 [Asparagus officinalis]	47.4898	31.7844	29.2661	88.1998	93.9413	88.7173	0.400727	-1.31931	down
ko03010	Ribosome	2.02505e-13	MSTRG.35813	HHC049155	K02895	NA	uncharacterized protein LOC109836457 [Asparagus officinalis]	19.0674	15.5372	9.77005	29.2958	28.7079	33.9405	0.482626	-1.05102	down
ko03010	Ribosome	2.02505e-13	MSTRG.35823	HHC049172	K02889	NA	60S ribosomal protein L21-1 [Ananas comosus]	106.99	132.725	5.55106	411.531	377.783	421.093	0.202631	-2.30307	down
ko03010	Ribosome	2.02505e-13	MSTRG.35907	HHC049988	K02980	NA	hypothetical protein glysoja_033170 [Glycine soja]	229.678	146.889	141.766	570.485	567.211	570.684	0.303406	-1.72068	down
ko03010	Ribosome	2.02505e-13	MSTRG.35962	HHC049619	K02872	NA	60S ribosomal protein L13a-4 [Asparagus officinalis]	121.111	82.8234	86.2553	287.314	279.331	273.395	0.345447	-1.53346	down
ko03010	Ribosome	2.02505e-13	MSTRG.35972	HHC049628	K02878	NA	uncharacterized protein LOC112201758 [Rosa chinensis]	6.17083	10.0362	13.9651	36.8523	36.7799	30.8842	0.288684	-1.79244	down
ko03010	Ribosome	2.02505e-13	MSTRG.35	HHC000056	K02884	NA	PREDICTED: 50S ribosomal protein L19-2, chloroplastic [Musa acuminata subsp. malaccensis];PREDICTED: 50S ribosomal protein L19-1, chloroplastic [Nelumbo nucifera]	61.7253	51.1575	30.2092	95.4733	96.7184	145.841	0.423308	-1.24022	down
ko03010	Ribosome	2.02505e-13	MSTRG.36003	HHC050813	K02933	NA	uncharacterized protein LOC109712173 [Ananas comosus]	1.58784	1.40517	1.39212	4.19366	4.03978	3.20148	0.383486	-1.38275	down
ko03010	Ribosome	2.02505e-13	MSTRG.36124	HHC047553	K02975	NA	hypothetical protein SORBI_3003G322532 [Sorghum bicolor]	88.6436	71.9576	57.7347	290.722	291.915	305.374	0.245871	-2.02403	down
ko03010	Ribosome	2.02505e-13	MSTRG.3711	HHC005533	K02987	NA	40S ribosomal protein S4-3 [Asparagus officinalis]	142.821	78.2263	73.1463	233.493	260.242	318.758	0.362087	-1.46559	down
ko03010	Ribosome	2.02505e-13	MSTRG.3799	HHC005629	K02891	NA	PREDICTED: 60S ribosomal protein L22-2-like [Musa acuminata subsp. malaccensis]	11.6892	13.2744	12.9617	27.6532	31.6825	26.7646	0.440478	-1.18286	down
ko03010	Ribosome	2.02505e-13	MSTRG.3803	HHC005633	K02891	NA	PREDICTED: 60S ribosomal protein L22-2-like [Musa acuminata subsp. malaccensis];PREDICTED: 60S ribosomal protein L22-3-like [Musa acuminata subsp. malaccensis]	79.166	44.4181	43.7033	112.546	109.554	117.769	0.492211	-1.02265	down
ko03010	Ribosome	2.02505e-13	MSTRG.414	HHC000469	K02983	NA	hypothetical protein BAE44_0004765, partial [Dichanthelium oligosanthes]	22.9552	15.9952	19.7195	36.3559	59.9921	58.4137	0.379098	-1.39936	down
ko03010	Ribosome	2.02505e-13	MSTRG.419	HHC000474	K02989	NA	40S ribosomal protein S5-like [Durio zibethinus];PREDICTED: 40S ribosomal protein S5-like [Gossypium arboreum]	77.7678	57.7751	38.1543	272.002	241.917	261.374	0.224041	-2.15817	down
ko03010	Ribosome	2.02505e-13	MSTRG.4468	HHC040869	K02896	NA	hypothetical protein AQUCO_01300386v1 [Aquilegia coerulea];PREDICTED: 60S ribosomal protein L24 [Musa acuminata subsp. malaccensis]	57.3087	32.2168	28.0554	149.175	136.534	154.222	0.267271	-1.90362	down
ko03010	Ribosome	2.02505e-13	MSTRG.4768	HHC041444	K02891	NA	PREDICTED: 60S ribosomal protein L22-2-like [Musa acuminata subsp. malaccensis]	116.905	74.2249	80.7132	213.153	185.154	205.047	0.450553	-1.15023	down
ko03010	Ribosome	2.02505e-13	MSTRG.4913	HHC041677	K02986	NA	neutral/alkaline invertase 1, mitochondrial [Phoenix dactylifera]	57.3632	67.6106	69.1548	28.2895	30.9953	25.052	2.30183	1.20278	up
ko03010	Ribosome	2.02505e-13	MSTRG.4954	HHC041756	K02905	NA	PREDICTED: 60S ribosomal protein L29-1 [Vitis vinifera]	325.158	237.888	166.572	997.035	658.465	569.042	0.327986	-1.60829	down
ko03010	Ribosome	2.02505e-13	MSTRG.5283	HHC042260	K02894	NA	PREDICTED: 60S ribosomal protein L23 [Nicotiana tomentosiformis]	886.655	903.961	469.72	1657.13	1683.83	1799.59	0.439707	-1.18539	down
ko03010	Ribosome	2.02505e-13	MSTRG.532	HHC000578	K02974	NA	40S ribosomal protein S24-1 [Ananas comosus]	31.4497	21.7023	24.4843	68.0344	65.5028	64.0015	0.393018	-1.34733	down
ko03010	Ribosome	2.02505e-13	MSTRG.5399	HHC042435	K02978	NA	PREDICTED: 40S ribosomal protein S27-2 [Elaeis guineensis]	5.29789	4.08598	3.56285	12.8906	13.7155	9.7111	0.35649	-1.48807	down
ko03010	Ribosome	2.02505e-13	MSTRG.5449	HHC042510	K02932	NA	60S ribosomal protein L5 [Asparagus officinalis]	20.3413	12.404	10.5721	85.1719	81.5396	85.3606	0.171845	-2.54082	down
ko03010	Ribosome	2.02505e-13	MSTRG.5550	HHC042623	K02987	NA	BTB/POZ and TAZ domain-containing protein 1-like [Asparagus officinalis]	30.6195	42.1494	35.0977	9.50964	8.06442	9.23707	4.0232	2.00834	up
ko03010	Ribosome	2.02505e-13	MSTRG.5562	HHC042652	K02943	NA	PREDICTED: 60S acidic ribosomal protein P2B [Elaeis guineensis];hypothetical protein CDL15_Pgr003274 [Punica granatum]	74.4307	46.9983	40.0479	116.144	120.424	115.847	0.458202	-1.12595	down
ko03010	Ribosome	2.02505e-13	MSTRG.5598	HHC042685	K02975	NA	40S ribosomal protein S25-4-like [Asparagus officinalis]	14.4866	9.55882	5.67329	25.2285	24.5018	25.2052	0.39659	-1.33428	down
ko03010	Ribosome	2.02505e-13	MSTRG.5611	HHC042697	K02927	NA	hypothetical protein MIMGU_mgv1a015002mg [Erythranthe guttata];hypothetical protein AQUCO_03700255v1 [Aquilegia coerulea]	201.595	109.266	89.9599	710.584	675.108	706.182	0.191609	-2.38377	down
ko03010	Ribosome	2.02505e-13	MSTRG.5662	HHC042770	K02936	NA	60S ribosomal protein L7a-1 [Asparagus officinalis]	487.662	263.371	247.158	1171.78	1037.22	1045.93	0.306671	-1.70524	down
ko03010	Ribosome	2.02505e-13	MSTRG.5684	HHC042805	K02912	NA	60S ribosomal protein L32-1 [Asparagus officinalis];60S ribosomal protein L32-1-like [Asparagus officinalis]	59.021	52.8044	46.2914	142.59	128.282	140.446	0.384414	-1.37927	down
ko03010	Ribosome	2.02505e-13	MSTRG.5812	HHC042983	K02990	NA	uncharacterized protein LOC109825306 [Asparagus officinalis]	23.568	21.8908	12.0769	50.8255	51.7672	50.2975	0.376321	-1.40997	down
ko03010	Ribosome	2.02505e-13	MSTRG.5847	HHC043043	K02893	NA	60S ribosomal protein L23A [Asparagus officinalis]	15.602	12.1894	29.1962	57.6438	25.7953	39.6256	0.46307	-1.1107	down
ko03010	Ribosome	2.02505e-13	MSTRG.5984	HHC043231	K02894	NA	PREDICTED: 60S ribosomal protein L23 [Nicotiana tomentosiformis];60s ribosomal protein l23, partial [Nicotiana attenuata]	69.6826	49.2137	50.1126	144.738	155.299	143.928	0.38068	-1.39335	down
ko03010	Ribosome	2.02505e-13	MSTRG.5994	HHC043246	K02917	NA	ribosomal protein L33 [Castanea sativa];hypothetical protein GOBAR_AA01073 [Gossypium barbadense]	19.6121	13.8683	14.9571	30.9552	34.7515	32.3104	0.494174	-1.01691	down
ko03010	Ribosome	2.02505e-13	MSTRG.6010	HHC043272	K02875	NA	PREDICTED: 60S ribosomal protein L14-1 [Nelumbo nucifera];probable 60S ribosomal protein L14 [Asparagus officinalis]	90.5857	68.1861	56.4605	147.837	148.026	152.568	0.479968	-1.05899	down
ko03010	Ribosome	2.02505e-13	MSTRG.6166	HHC043478	K02934	NA	tricalbin-3-like [Asparagus officinalis]	3.1084	2.13071	1.72966	14.0851	12.4508	11.8606	0.181495	-2.462	down
ko03010	Ribosome	2.02505e-13	MSTRG.6174	HHC043503	K02893	NA	60S ribosomal protein L23A [Asparagus officinalis]	341.977	273.447	173.698	606.335	626.216	602.721	0.429975	-1.21767	down
ko03010	Ribosome	2.02505e-13	MSTRG.634	HHC000732	K02863	NA	50S ribosomal protein L1, chloroplastic [Apostasia shenzhenica]	53.1882	58.2248	41.8692	140.141	151.193	155.905	0.342731	-1.54485	down
ko03010	Ribosome	2.02505e-13	MSTRG.6429	HHC043836	K02895	NA	uncharacterized protein LOC109836457 [Asparagus officinalis]	46.187	22.5831	22.1663	112.16	115.934	103.628	0.274135	-1.86704	down
ko03010	Ribosome	2.02505e-13	MSTRG.6439	HHC043855	K02889	NA	60S ribosomal protein L21-1 [Ananas comosus]	490.748	342.794	330.611	1085.42	1057.1	1064.64	0.362986	-1.46201	down
ko03010	Ribosome	2.02505e-13	MSTRG.6700	HHC044194	K02872	NA	60S ribosomal protein L13a-4 [Asparagus officinalis]	148.646	120.721	61.3621	336.137	346.389	345.219	0.321801	-1.63576	down
ko03010	Ribosome	2.02505e-13	MSTRG.6707	HHC044202	K02878	NA	ribosomal protein L16, partial (plastid) [Molineria capitulata]	4.15353	8.17167	7.74018	24.1334	23.1665	30.8724	0.256681	-1.96195	down
ko03010	Ribosome	2.02505e-13	MSTRG.7194	HHC044790	K02939	NA	PREDICTED: 50S ribosomal protein L9, chloroplastic [Nelumbo nucifera]	8.03738	6.04851	7.12001	16.2455	13.0395	13.7142	0.493168	-1.01985	down
ko03010	Ribosome	2.02505e-13	MSTRG.726	HHC000865	K02898	NA	hypothetical protein B296_00021934 [Ensete ventricosum]	74.7139	44.395	39.8993	116.114	113.247	111.229	0.46686	-1.09894	down
ko03010	Ribosome	2.02505e-13	MSTRG.7291	HHC044925	K02882	NA	60S ribosomal protein L18a [Asparagus officinalis];uncharacterized protein A4U43_C07F19990 [Asparagus officinalis]	971.493	772.193	676.852	1912.16	1952.07	1942.45	0.416853	-1.26239	down
ko03010	Ribosome	2.02505e-13	MSTRG.7449	HHC045163	K02966	NA	40S ribosomal protein S19-like [Ananas comosus]	44.1309	30.8248	30.9504	84.885	79.7865	80.882	0.431296	-1.21325	down
ko03010	Ribosome	2.02505e-13	MSTRG.7595	HHC045402	K02986	NA	hypothetical protein F383_09920 [Gossypium arboreum]	0.0960235	3.90463	5.84448	46.6086	50.1044	51.815	0.0662847	-3.91518	down
ko03010	Ribosome	2.02505e-13	MSTRG.7620	HHC045445	K02925	NA	60S ribosomal protein L3 isoform X1 [Asparagus officinalis]	287.305	236.035	157.388	865.325	841.664	843.257	0.266927	-1.90548	down
ko03010	Ribosome	2.02505e-13	MSTRG.7662	HHC045539	K02964	NA	PREDICTED: 40S ribosomal protein S18-like isoform X1 [Lupinus angustifolius]	54.6797	43.5431	31.4097	155.088	154.105	154.597	0.279506	-1.83905	down
ko03010	Ribosome	2.02505e-13	MSTRG.769	HHC000928	K02942	NA	60S acidic ribosomal protein P1-like [Asparagus officinalis]	7.68704	4.09099	3.48128	22.1995	22.0231	21.9859	0.230473	-2.11733	down
ko03010	Ribosome	2.02505e-13	MSTRG.7773	HHC045746	K02997	NA	40S ribosomal protein S9-2 [Cinnamomum micranthum f. kanehirae]	600.162	473.553	449.278	1063.85	1058.84	1047.87	0.480354	-1.05783	down
ko03010	Ribosome	2.02505e-13	MSTRG.7994	HHC046256	K02898	NA	60S ribosomal protein L26-2-like [Dendrobium catenatum]	12.554	6.7235	5.72951	25.4762	25.546	24.4139	0.331499	-1.59292	down
ko03010	Ribosome	2.02505e-13	MSTRG.7999	HHC046261	K02898	NA	PREDICTED: 60S ribosomal protein L26-1-like [Nelumbo nucifera]	119.516	73.2019	74.3728	196.615	179.105	179.363	0.481171	-1.05538	down
ko03010	Ribosome	2.02505e-13	MSTRG.8049	HHC046357	K02937	NA	PREDICTED: 60S ribosomal protein L7-2 [Musa acuminata subsp. malaccensis]	1.22906	1.32875	0.546012	5.67787	5.74008	6.58642	0.172393	-2.53623	down
ko03010	Ribosome	2.02505e-13	MSTRG.8173	HHC046569	K02897	NA	PREDICTED: uncharacterized protein LOC105042949 isoform X1 [Elaeis guineensis]	10.4742	7.59216	4.79521	22.5304	21.999	20.1659	0.353373	-1.50074	down
ko03010	Ribosome	2.02505e-13	MSTRG.8300	HHC046772	K02926	NA	uncharacterized protein LOC109833643 [Asparagus officinalis]	3.68238	3.07525	2.27394	8.4437	7.75255	8.75109	0.362025	-1.46584	down
ko03010	Ribosome	2.02505e-13	MSTRG.8364	HHC046869	K02889	NA	60S ribosomal protein L21-1 [Phoenix dactylifera]	20.2883	11.4016	8.66661	45.6857	54.6254	55.0876	0.259697	-1.9451	down
ko03010	Ribosome	2.02505e-13	MSTRG.8430	HHC046973	K02896	NA	Ribosome biogenesis protein [Actinidia chinensis var. chinensis]	11.9443	9.39245	9.06162	21.368	21.066	20.1932	0.485386	-1.0428	down
ko03010	Ribosome	2.02505e-13	MSTRG.8476	HHC047146	K02947	NA	PREDICTED: 40S ribosomal protein S10-1-like [Musa acuminata subsp. malaccensis]	111.024	85.52	61.9074	226.502	230.308	226.95	0.377986	-1.4036	down
ko03010	Ribosome	2.02505e-13	MSTRG.9081	HHC006720	K02885	NA	60S ribosomal protein L19-3 [Asparagus officinalis];60S ribosomal protein L19-1 [Sesamum indicum]	117.903	94.3582	102.832	345.551	340.412	354.419	0.302863	-1.72327	down
ko03010	Ribosome	2.02505e-13	MSTRG.9142	HHC006796	K02971	NA	40S ribosomal protein S21 [Asparagus officinalis]	23.4045	15.6982	12.0719	49.2991	48.52	49.4701	0.347443	-1.52515	down
ko03010	Ribosome	2.02505e-13	MSTRG.9143	HHC006797	K02987	NA	40S ribosomal protein S4-3 [Asparagus officinalis]	275.197	216.647	157.463	570.103	552.998	568.559	0.383828	-1.38147	down
ko03010	Ribosome	2.02505e-13	MSTRG.9309	HHC007039	K02934	NA	60S ribosomal protein L6-like [Asparagus officinalis]	188.833	176.07	141.022	433.318	437.545	436.095	0.387101	-1.36922	down
ko03010	Ribosome	2.02505e-13	MSTRG.9822	HHC008049	K02940	NA	60S ribosomal protein L9 [Asparagus officinalis]	9.16351	10.2776	9.15184	28.2944	27.8882	18.6046	0.382325	-1.38713	down
ko03010	Ribosome	2.02505e-13	MSTRG.9906	HHC008251	K02976	NA	40S ribosomal protein S26-2 [Amborella trichopoda];40S ribosomal protein S26-1-like [Asparagus officinalis]	761.064	502.871	381.835	1459.55	1492.7	1460.19	0.372984	-1.42281	down
ko03010	Ribosome	2.02505e-13	MSTRG.9965	HHC008379	K02993	NA	40S ribosomal protein S7-like [Asparagus officinalis];PREDICTED: 40S ribosomal protein S7-like [Musa acuminata subsp. malaccensis]	163.402	99.6227	77.1016	341.795	267.546	275.768	0.384276	-1.37978	down
ko04016	MAPK signaling pathway - plant	0.000105718	gene-HHC002774	HHC002774	K20606	EC:2.7.11.25	mitogen-activated protein kinase kinase kinase NPK1-like isoform X1 [Asparagus officinalis];mitogen-activated protein kinase kinase kinase NPK1-like isoform X2 [Asparagus officinalis]	2.08482	1.14823	0.769343	12.05	12.4149	11.194	0.112241	-3.15533	down
ko04016	MAPK signaling pathway - plant	0.000105718	gene-HHC010418	HHC010418	K13424	NA	PREDICTED: probable WRKY transcription factor 31 isoform X1 [Elaeis guineensis]	0.395561	0.539126	0.236508	0.0755432	0.12604	0.0968019	3.92511	1.97273	up
ko04016	MAPK signaling pathway - plant	0.000105718	gene-HHC010831	HHC010831	K20725	NA	PREDICTED: VQ motif-containing protein 8, chloroplastic-like [Elaeis guineensis]	0.191524	0.700937	0.39166	0.0279491	0.0562595	0.0563878	9.13339	3.19115	up
ko04016	MAPK signaling pathway - plant	0.000105718	gene-HHC014408	HHC014408	K13422	NA	transcription factor ICE1 [Amborella trichopoda]	4.34411	2.12385	0.0001	18.3483	19.8146	14.5556	0.122691	-3.0269	down
ko04016	MAPK signaling pathway - plant	0.000105718	gene-HHC017277	HHC017277	K13422	NA	TT8L [Freesia hybrid cultivar]	1.58993	0.0809508	0.612876	0.0803199	0.0001	0.0001	28.3626	4.82592	up
ko04016	MAPK signaling pathway - plant	0.000105718	gene-HHC017846	HHC017846	K13424	NA	probable WRKY transcription factor 57 isoform X3 [Asparagus officinalis]	2.26754	1.33368	1.43744	0.467431	0.542827	0.443503	3.46595	1.79325	up
ko04016	MAPK signaling pathway - plant	0.000105718	gene-HHC020732	HHC020732	K13425	NA	putative WRKY transcription factor 14 [Apostasia shenzhenica]	0.903746	0.843971	1.25681	10.2003	7.99238	8.65746	0.1119	-3.15972	down
ko04016	MAPK signaling pathway - plant	0.000105718	gene-HHC022197	HHC022197	K13449	NA	PREDICTED: pathogenesis-related protein PRB1-3-like [Elaeis guineensis]	0.0001	0.0001	0.0001	0.584565	0.54678	0.615823	0.000171706	-12.5078	down
ko04016	MAPK signaling pathway - plant	0.000105718	gene-HHC035375	HHC035375	K20725	NA	nuclear speckle RNA-binding protein B-like [Asparagus officinalis]	0.500425	0.748977	0.931827	0.174374	0.28361	0.238716	3.1308	1.64653	up
ko04016	MAPK signaling pathway - plant	0.000105718	gene-HHC035899	HHC035899	K13413	EC:2.7.12.2	hypothetical protein DCAR_002318 [Daucus carota subsp. sativus]	0.0445122	0.0276843	0.0001	0.44935	0.790045	0.557145	0.0402421	-4.63515	down
ko04016	MAPK signaling pathway - plant	0.000105718	gene-HHC035900	HHC035900	K13413	EC:2.7.12.2	protein LIGHT-DEPENDENT SHORT HYPOCOTYLS 3-like protein [Cinnamomum micranthum f. kanehirae]	0.773953	0.54054	0.0001	0.0513294	0.0641623	0.0001	11.3727	3.50751	up
ko04016	MAPK signaling pathway - plant	0.000105718	gene-HHC036247	HHC036247	K20717	EC:2.7.11.25	mitogen-activated protein kinase kinase kinase YODA-like isoform X1 [Asparagus officinalis]	1.02437	1.22148	1.36289	5.74329	4.49665	5.02318	0.236435	-2.08048	down
ko04016	MAPK signaling pathway - plant	0.000105718	gene-HHC038805	HHC038805	K14497	EC:3.1.3.16	protein phosphatase 2C 53-like isoform X1 [Phoenix dactylifera]	3.14358	3.68235	4.17094	1.84037	1.07721	0.93117	2.85726	1.51463	up
ko04016	MAPK signaling pathway - plant	0.000105718	gene-HHC039422	HHC039422	K13425	NA	probable WRKY transcription factor 14 [Phoenix dactylifera]	0.114895	0.376482	0.42902	1.13431	1.5224	1.40454	0.226629	-2.1416	down
ko04016	MAPK signaling pathway - plant	0.000105718	gene-HHC040160	HHC040160	K13447	EC:1.6.3.-;EC:1.11.1.-	LOW QUALITY PROTEIN: respiratory burst oxidase homolog protein E-like [Asparagus officinalis]	2.89151	2.26447	4.13515	1.66333	1.16106	1.53242	2.13255	1.09258	up
ko04016	MAPK signaling pathway - plant	0.000105718	gene-HHC041378	HHC041378	K14498	EC:2.7.11.1	protein ABCI12, chloroplastic [Asparagus officinalis]	0.947897	0.555156	0.385248	2.02902	1.87397	2.08347	0.315429	-1.66461	down
ko04016	MAPK signaling pathway - plant	0.000105718	gene-HHC043765	HHC043765	K14497	EC:3.1.3.16	PREDICTED: probable protein phosphatase 2C 37 [Musa acuminata subsp. malaccensis]	5.94917	4.70416	9.49196	2.26052	3.50403	3.51899	2.17	1.1177	up
ko04016	MAPK signaling pathway - plant	0.000105718	gene-HHC044548	HHC044548	K14497	EC:3.1.3.16	hypothetical protein B296_00058882 [Ensete ventricosum]	0.210814	0.45791	0.639647	0.110498	0.0911067	0.0623383	4.95703	2.30948	up
ko04016	MAPK signaling pathway - plant	0.000105718	gene-HHC046104	HHC046104	K13420	EC:2.7.11.1	putative receptor-like protein kinase At3g47110 [Asparagus officinalis]	1.33901	0.25025	2.72277	0.470587	0.466301	0.726005	2.59309	1.37467	up
ko04016	MAPK signaling pathway - plant	0.000105718	gene-HHC046551	HHC046551	K13424	NA	probable WRKY transcription factor 12 [Asparagus officinalis]	0.796037	0.864948	0.338971	0.203044	0.0430391	0.138966	5.19402	2.37685	up
ko04016	MAPK signaling pathway - plant	0.000105718	gene-HHC047765	HHC047765	K13424	NA	PREDICTED: probable WRKY transcription factor 31 isoform X1 [Elaeis guineensis]	1.70236	1.57856	2.32132	0.291191	0.257124	0.477163	5.46306	2.44971	up
ko04016	MAPK signaling pathway - plant	0.000105718	gene-HHC049726	HHC049726	K13424	NA	probable WRKY transcription factor 12 [Asparagus officinalis]	0.306478	0.970789	1.05166	0.0001	0.112968	0.0001	20.5794	4.36313	up
ko04016	MAPK signaling pathway - plant	0.000105718	gene-HHC052752	HHC052752	K13420	EC:2.7.11.1	uncharacterized protein A4U43_C01F32780 [Asparagus officinalis]	1.84448	1.4892	2.14772	0.551926	0.723226	0.516691	3.05908	1.6131	up
ko04016	MAPK signaling pathway - plant	0.000105718	gene-HHC053379	HHC053379	K13420	EC:2.7.11.1	polygalacturonase inhibitor-like [Asparagus officinalis]	0.685689	0.121784	0.0427265	1.76106	1.57107	2.23215	0.152796	-2.71032	down
ko04016	MAPK signaling pathway - plant	0.000105718	MSTRG.1001	HHC001230	K14514	NA	phosphate transporter PHO1-3 [Asparagus officinalis]	2.13132	2.37371	2.68477	0.193502	0.368479	0.294628	8.39333	3.06924	up
ko04016	MAPK signaling pathway - plant	0.000105718	MSTRG.10108	HHC008608	K13420	EC:2.7.11.1	LOW QUALITY PROTEIN: probable leucine-rich repeat receptor-like protein kinase At5g63930 [Phoenix dactylifera];uncharacterized protein A4U43_C04F11100 [Asparagus officinalis]	4.58413	4.75753	4.43913	1.07151	0.849802	0.757452	5.14446	2.36302	up
ko04016	MAPK signaling pathway - plant	0.000105718	MSTRG.10279	HHC008870	K14498	EC:2.7.11.1	serine/threonine-protein kinase SAPK3-like [Asparagus officinalis]	22.1377	23.6081	64.852	5.32304	4.47138	5.51137	7.22589	2.85317	up
ko04016	MAPK signaling pathway - plant	0.000105718	MSTRG.10406	HHC009078	K20725	NA	PREDICTED: uncharacterized protein LOC103995088 [Musa acuminata subsp. malaccensis]	2.66814	2.37471	4.13007	0.650139	0.603203	0.607666	4.92901	2.3013	up
ko04016	MAPK signaling pathway - plant	0.000105718	MSTRG.10457	HHC009158	K20726	NA	protein REVERSION-TO-ETHYLENE SENSITIVITY1 [Asparagus officinalis]	19.742	22.0019	13.0806	48.5463	50.1697	53.5537	0.360049	-1.47373	down
ko04016	MAPK signaling pathway - plant	0.000105718	MSTRG.10492	HHC009221	K20606	EC:2.7.11.25	mitogen-activated protein kinase kinase kinase NPK1-like isoform X1 [Asparagus officinalis];mitogen-activated protein kinase kinase kinase NPK1-like isoform X3 [Asparagus officinalis]	3.85006	1.18523	1.41132	22.4527	21.5784	21.5763	0.0982604	-3.34725	down
ko04016	MAPK signaling pathway - plant	0.000105718	MSTRG.10741	HHC009610	K13425	NA	transcription factor WRKYY2 [Narcissus hybrid cultivar]	161.487	194.627	235.836	28.8777	29.8001	31.715	6.54865	2.7112	up
ko04016	MAPK signaling pathway - plant	0.000105718	MSTRG.10742	HHC009612	K02183	NA	probable calcium-binding protein CML29 [Phoenix dactylifera]	328.735	380.725	269.772	39.9455	33.4977	37.2637	8.84528	3.14491	up
ko04016	MAPK signaling pathway - plant	0.000105718	MSTRG.10840	HHC009755	K13413	EC:2.7.12.2	mitogen-activated protein kinase kinase 5-like [Phoenix dactylifera]	283.598	200.949	559.971	98.8925	109.098	99.3732	3.39831	1.76482	up
ko04016	MAPK signaling pathway - plant	0.000105718	MSTRG.10932	HHC009894	K20547	EC:3.2.1.14	chitinase-like protein 1 [Dendrobium catenatum];chitinase-like protein 1 [Asparagus officinalis]	88.2849	33.399	18.6225	164.782	166.054	171.316	0.27941	-1.83955	down
ko04016	MAPK signaling pathway - plant	0.000105718	MSTRG.11957	HHC011323	K13424	NA	probable WRKY transcription factor 75 [Asparagus officinalis]	7.381	2.72381	4.79451	0.450162	0.897863	0.803422	6.92526	2.79187	up
ko04016	MAPK signaling pathway - plant	0.000105718	MSTRG.12432	HHC011919	K20725	NA	PREDICTED: protein MKS1-like [Elaeis guineensis]	15.6069	11.6105	20.6525	5.88082	5.68496	5.8175	2.75379	1.46142	up
ko04016	MAPK signaling pathway - plant	0.000105718	MSTRG.13240	HHC013359	K17686	EC:3.6.3.54	LOW QUALITY PROTEIN: copper-transporting ATPase RAN1-like [Asparagus officinalis]	22.6451	25.484	32.2695	12.9776	12.8825	13.6972	2.03246	1.02323	up
ko04016	MAPK signaling pathway - plant	0.000105718	MSTRG.13293	HHC013410	K13420	EC:2.7.11.1	uncharacterized protein A4U43_C01F32780 [Asparagus officinalis];LRR receptor-like serine/threonine-protein kinase EFR [Asparagus officinalis]	3.09867	2.64577	3.37328	0.66706	1.09934	0.978301	3.32193	1.73202	up
ko04016	MAPK signaling pathway - plant	0.000105718	MSTRG.13300	HHC013417	K13420	EC:2.7.11.1	LRR receptor-like serine/threonine-protein kinase EFR [Asparagus officinalis]	5.11555	3.50122	7.77562	0.769794	2.0799	1.11442	4.13519	2.04795	up
ko04016	MAPK signaling pathway - plant	0.000105718	MSTRG.13727	HHC014010	K13425	NA	probable WRKY transcription factor 27 [Asparagus officinalis]	102.07	80.0512	133.429	16.4727	17.2205	11.7876	6.93809	2.79454	up
ko04016	MAPK signaling pathway - plant	0.000105718	MSTRG.13817	HHC014126	K00940	EC:2.7.4.6	uncharacterized protein A4U43_C05F19740 [Asparagus officinalis]	14.5056	9.13736	16.0691	5.68565	5.9404	4.99203	2.38969	1.25682	up
ko04016	MAPK signaling pathway - plant	0.000105718	MSTRG.13818	HHC014127	K00940	EC:2.7.4.6	nucleoside diphosphate kinase III, chloroplastic/mitochondrial [Asparagus officinalis]	114.173	97.5402	78.9176	252.523	239.742	269.929	0.381309	-1.39097	down
ko04016	MAPK signaling pathway - plant	0.000105718	MSTRG.14070	HHC014464	K13447	EC:1.6.3.-;EC:1.11.1.-	respiratory burst oxidase homolog protein C-like isoform X1 [Phoenix dactylifera];uncharacterized protein A4U43_C09F15840 [Asparagus officinalis]	314.242	95.2933	566.099	23.02	23.9297	24.9404	13.5712	3.76247	up
ko04016	MAPK signaling pathway - plant	0.000105718	MSTRG.14367	HHC014899	K13424	NA	transcription factor WRKY33 [Lindera glauca]	5.29336	2.62494	6.6757	0.676757	1.18617	0.565632	6.00932	2.5872	up
ko04016	MAPK signaling pathway - plant	0.000105718	MSTRG.14684	HHC015324	K13425	NA	transcription factor WRKYJ2, partial [Narcissus hybrid cultivar]	51.9885	46.027	68.6073	12.6165	16.9627	16.7912	3.5933	1.84531	up
ko04016	MAPK signaling pathway - plant	0.000105718	MSTRG.14814	HHC015514	K20547	EC:3.2.1.14	chitinase-like protein 1 [Phoenix dactylifera]	71.4491	8.4357	4.77247	8.99057	6.9974	14.7691	2.75245	1.46072	up
ko04016	MAPK signaling pathway - plant	0.000105718	MSTRG.15720	HHC016646	K20557	NA	PREDICTED: uncharacterized protein LOC104418889 [Eucalyptus grandis]	4.54795	2.67392	3.32688	9.57657	9.33269	8.05429	0.391222	-1.35394	down
ko04016	MAPK signaling pathway - plant	0.000105718	MSTRG.16412	HHC017518	K13425	NA	protein WRKY1-like [Asparagus officinalis]	59.5667	36.497	115.825	20.775	21.1888	21.8211	3.32194	1.73202	up
ko04016	MAPK signaling pathway - plant	0.000105718	MSTRG.16491	HHC017641	K13449	NA	PREDICTED: pathogenesis-related protein PRB1-3-like [Elaeis guineensis]	2.20919	2.31588	6.15116	0.604024	0.370283	0.733063	6.25303	2.64456	up
ko04016	MAPK signaling pathway - plant	0.000105718	MSTRG.16493	HHC017652	K13449	NA	PREDICTED: pathogenesis-related protein PRB1-3-like [Elaeis guineensis]	1.08037	0.760368	4.07895	0.0001	0.0001	0.0001	19732.3	14.2683	up
ko04016	MAPK signaling pathway - plant	0.000105718	MSTRG.16612	HHC017813	K13424	NA	probable WRKY transcription factor 3 [Dendrobium catenatum]	3.79428	4.28428	5.99397	3.53796	1.11393	0.921262	2.52506	1.33632	up
ko04016	MAPK signaling pathway - plant	0.000105718	MSTRG.18175	HHC020264	K20772	EC:4.4.1.14	1-aminocyclopropane-1-carboxylic acid synthase [Narcissus tazetta subsp. chinensis]	29.8091	12.6424	26.6318	0.891694	0.654828	0.953535	27.6327	4.7883	up
ko04016	MAPK signaling pathway - plant	0.000105718	MSTRG.1820	HHC002367	K13425	NA	transcription factor WRKYY2 [Narcissus hybrid cultivar]	8.75775	17.1873	11.4728	2.83578	3.00804	2.94537	4.25726	2.08993	up
ko04016	MAPK signaling pathway - plant	0.000105718	MSTRG.18365	HHC020539	K20553	EC:3.1.13.-	PREDICTED: LOW QUALITY PROTEIN: 5'-3' exoribonuclease 3 [Elaeis guineensis]	10.0918	6.85357	7.80933	17.9268	14.3338	17.4479	0.497997	-1.00579	down
ko04016	MAPK signaling pathway - plant	0.000105718	MSTRG.18580	HHC020802	K13422	NA	PREDICTED: transcription factor MYC2 [Musa acuminata subsp. malaccensis]	26.9096	15.912	16.8008	1.23019	0.662766	1.60914	17.0248	4.08957	up
ko04016	MAPK signaling pathway - plant	0.000105718	MSTRG.18661	HHC020893	K03781	EC:1.11.1.6	catalase-1 [Ananas comosus];catalase isozyme 1 [Asparagus officinalis]	3.27652	5.77161	4.07218	1.04171	1.30709	1.44245	3.46068	1.79106	up
ko04016	MAPK signaling pathway - plant	0.000105718	MSTRG.18712	HHC020974	K20772	EC:4.4.1.14	LOW QUALITY PROTEIN: 1-aminocyclopropane-1-carboxylate synthase-like [Asparagus officinalis]	4.24831	1.2109	3.69387	0.0362594	0.149325	0.0740243	35.2572	5.13984	up
ko04016	MAPK signaling pathway - plant	0.000105718	MSTRG.18764	HHC021054	K20718	EC:2.7.11.1	PREDICTED: leucine-rich repeat receptor-like serine/threonine-protein kinase At1g17230 [Daucus carota subsp. sativus]	3.29988	1.88756	0.227909	19.2198	20.2909	20.5044	0.0902331	-3.4702	down
ko04016	MAPK signaling pathway - plant	0.000105718	MSTRG.18886	HHC021196	K20557	NA	hypothetical protein AQUCO_00600159v1 [Aquilegia coerulea]	0.411332	0.348033	0.37339	2.43845	2.07693	1.94232	0.175412	-2.51118	down
ko04016	MAPK signaling pathway - plant	0.000105718	MSTRG.19517	HHC022078	K13413	EC:2.7.12.2	PREDICTED: protein G1-like1 [Elaeis guineensis]	35.5088	17.9083	18.3303	10.2426	9.56729	9.28565	2.46592	1.30213	up
ko04016	MAPK signaling pathway - plant	0.000105718	MSTRG.19693	HHC022337	K13424	NA	probable WRKY transcription factor 57 isoform X3 [Asparagus officinalis]	5.56606	4.84907	4.2962	0.881231	0.644826	1.21868	5.35983	2.42219	up
ko04016	MAPK signaling pathway - plant	0.000105718	MSTRG.20556	HHC023482	K14498	EC:2.7.11.1	serine/threonine-protein kinase SAPK7 [Ornithogalum longebracteatum]	55.6582	25.6832	101.6	28.1002	24.4642	29.569	2.22737	1.15534	up
ko04016	MAPK signaling pathway - plant	0.000105718	MSTRG.21215	HHC024663	K20772	EC:4.4.1.14	1-aminocyclopropane-1-carboxylic acid synthase [Narcissus tazetta subsp. chinensis]	11.1443	23.8386	53.6692	3.5151	3.79727	4.64863	7.41177	2.88982	up
ko04016	MAPK signaling pathway - plant	0.000105718	MSTRG.21229	HHC024676	K20600	EC:2.7.11.24	LOW QUALITY PROTEIN: mitogen-activated protein kinase homolog MMK2-like [Asparagus officinalis]	9.43196	7.39881	5.0884	16.1654	16.6664	17.1953	0.438146	-1.19052	down
ko04016	MAPK signaling pathway - plant	0.000105718	MSTRG.21879	HHC025566	K02183	NA	polcalcin Cyn d 7-like [Asparagus officinalis]	68.8167	34.0591	51.4644	7.47945	7.39825	6.60018	7.18601	2.84519	up
ko04016	MAPK signaling pathway - plant	0.000105718	MSTRG.22132	HHC026025	K02183	NA	putative calcium-binding protein [Ananas comosus]	92.3578	80.4747	73.8025	27.9738	24.7975	25.5386	3.14947	1.65511	up
ko04016	MAPK signaling pathway - plant	0.000105718	MSTRG.22408	HHC026587	K14516	NA	PREDICTED: ethylene-responsive transcription factor 1B-like [Juglans regia]	14.2669	7.58274	10.7027	2.5124	1.60027	3.03599	4.55363	2.18702	up
ko04016	MAPK signaling pathway - plant	0.000105718	MSTRG.22978	HHC027490	K02183	NA	calmodulin-1-like [Phoenix dactylifera]	14.5375	12.9482	23.0428	1.2916	2.1731	0.900574	11.5751	3.53295	up
ko04016	MAPK signaling pathway - plant	0.000105718	MSTRG.23086	HHC027653	K02183	NA	probable calcium-binding protein CML45 [Jatropha curcas]	2.03286	1.32779	2.57511	0.956661	1.04951	0.784235	2.1272	1.08896	up
ko04016	MAPK signaling pathway - plant	0.000105718	MSTRG.23476	HHC028206	K13420	EC:2.7.11.1	LRR receptor-like serine/threonine-protein kinase EFR [Asparagus officinalis]	0.466272	0.572337	0.853621	0.0715794	0.115598	0.0580372	7.71663	2.94797	up
ko04016	MAPK signaling pathway - plant	0.000105718	MSTRG.23483	HHC028213	K13420	EC:2.7.11.1	LRR receptor-like serine/threonine-protein kinase EFR [Asparagus officinalis]	3.80915	3.93014	2.15218	0.556723	0.850373	0.513496	5.15022	2.36463	up
ko04016	MAPK signaling pathway - plant	0.000105718	MSTRG.23488	HHC028216	K13420	EC:2.7.11.1	LRR receptor-like serine/threonine-protein kinase EFR [Asparagus officinalis]	2.50788	2.05232	2.18263	0.57604	0.314621	0.351684	5.42751	2.44029	up
ko04016	MAPK signaling pathway - plant	0.000105718	MSTRG.23490	HHC028219	K13420	EC:2.7.11.1	LRR receptor-like serine/threonine-protein kinase EFR [Asparagus officinalis]	6.49312	3.99139	9.15451	2.41723	2.77067	1.87546	2.78041	1.4753	up
ko04016	MAPK signaling pathway - plant	0.000105718	MSTRG.23503	HHC028231	K13420	EC:2.7.11.1	LRR receptor-like serine/threonine-protein kinase EFR [Asparagus officinalis]	1.33665	2.09985	1.79061	0.210732	0.624811	0.755513	3.28531	1.71603	up
ko04016	MAPK signaling pathway - plant	0.000105718	MSTRG.23539	HHC028295	K13420	EC:2.7.11.1	LRR receptor-like serine/threonine-protein kinase EFR [Asparagus officinalis]	45.2328	25.1983	48.3786	6.42934	9.15107	9.49881	4.73738	2.24409	up
ko04016	MAPK signaling pathway - plant	0.000105718	MSTRG.23576	HHC028362	K20716	NA	mitogen-activated protein kinase kinase kinase ANP1-like [Dendrobium catenatum]	0.970516	0.553185	1.40999	2.15783	2.5093	2.12993	0.431611	-1.2122	down
ko04016	MAPK signaling pathway - plant	0.000105718	MSTRG.23577	HHC028366	K13424	NA	PREDICTED: probable WRKY transcription factor 31 [Elaeis guineensis]	89.1093	59.6024	179.673	8.24222	11.0264	12.5668	10.3151	3.36668	up
ko04016	MAPK signaling pathway - plant	0.000105718	MSTRG.23805	HHC028661	K13424	NA	probable WRKY transcription factor 12 [Asparagus officinalis]	11.8623	16.1211	11.4135	7.3677	6.23662	4.90331	2.12868	1.08996	up
ko04016	MAPK signaling pathway - plant	0.000105718	MSTRG.23869	HHC028724	K14515	NA	hypothetical protein BHE74_00046053, partial [Ensete ventricosum]	2.45861	3.37096	6.37063	0.285312	0.0001	0.0001	42.7309	5.41721	up
ko04016	MAPK signaling pathway - plant	0.000105718	MSTRG.23940	HHC028820	K20714	EC:2.7.11.1	PREDICTED: serine/threonine-protein kinase OXI1-like [Elaeis guineensis]	0.0001	1.05589	1.59557	0.0001	0.133351	0.0001	19.8542	4.31137	up
ko04016	MAPK signaling pathway - plant	0.000105718	MSTRG.24098	HHC029051	K20725	NA	PREDICTED: protein MKS1-like [Elaeis guineensis]	14.0998	11.623	24.9117	5.99903	6.82025	7.12155	2.53924	1.3444	up
ko04016	MAPK signaling pathway - plant	0.000105718	MSTRG.24139	HHC029104	K14498	EC:2.7.11.1	serine/threonine-protein kinase SAPK7-like protein [Ornithogalum longebracteatum]	63.0476	89.4783	60.5221	34.8067	31.4842	38.5025	2.03303	1.02363	up
ko04016	MAPK signaling pathway - plant	0.000105718	MSTRG.24338	HHC029360	K13420	EC:2.7.11.1	polygalacturonase inhibitor-like [Asparagus officinalis]	9.05618	1.81617	1.5705	26.9594	26.4677	25.179	0.158294	-2.65932	down
ko04016	MAPK signaling pathway - plant	0.000105718	MSTRG.24617	HHC029711	K00940	EC:2.7.4.6	uncharacterized protein A4U43_C05F19750 [Asparagus officinalis]	200.81	164.985	93.5475	301.969	320.829	320.984	0.486704	-1.03888	down
ko04016	MAPK signaling pathway - plant	0.000105718	MSTRG.24618	HHC029712	K00940	EC:2.7.4.6	uncharacterized protein A4U43_C05F19740 [Asparagus officinalis]	16.0717	12.193	16.3199	4.41193	4.29745	4.86044	3.28557	1.71614	up
ko04016	MAPK signaling pathway - plant	0.000105718	MSTRG.24696	HHC029825	K13447	EC:1.6.3.-;EC:1.11.1.-	PREDICTED: respiratory burst oxidase homolog protein A-like [Musa acuminata subsp. malaccensis]	27.703	22.5428	40.9884	13.1105	15.3415	15.7307	2.06493	1.04609	up
ko04016	MAPK signaling pathway - plant	0.000105718	MSTRG.25122	HHC030445	K17686	EC:3.6.3.54	LOW QUALITY PROTEIN: copper-transporting ATPase RAN1-like [Asparagus officinalis]	52.6866	28.5297	57.061	11.3685	12.0612	12.6401	3.83361	1.9387	up
ko04016	MAPK signaling pathway - plant	0.000105718	MSTRG.25605	HHC031227	K14498	EC:2.7.11.1	serine/threonine-protein kinase SAPK2-like isoform X1 [Asparagus officinalis]	86.593	108.281	217.054	38.427	39.1334	39.8429	3.50866	1.81092	up
ko04016	MAPK signaling pathway - plant	0.000105718	MSTRG.25631	HHC031305	K02183	NA	esterase AGAP003155-like [Asparagus officinalis]	1.218	2.34857	6.88222	1.05979	1.16661	1.7641	2.61842	1.3887	up
ko04016	MAPK signaling pathway - plant	0.000105718	MSTRG.26119	HHC032197	K14512	EC:2.7.11.24	PREDICTED: mitogen-activated protein kinase 1 [Musa acuminata subsp. malaccensis]	15.2336	16.1408	12.1448	30.2956	29.5521	31.4851	0.47649	-1.06948	down
ko04016	MAPK signaling pathway - plant	0.000105718	MSTRG.2660	HHC003652	K20536	EC:2.7.11.24	mitogen-activated protein kinase 5 [Asparagus officinalis];Retrovirus-related Pol polyprotein from transposon TNT 1-94 [Vitis vinifera]	56.7035	41.2902	50.1659	4.45988	8.66441	8.41755	6.87776	2.78194	up
ko04016	MAPK signaling pathway - plant	0.000105718	MSTRG.26775	HHC033197	K14496	NA	LOW QUALITY PROTEIN: abscisic acid receptor PYL8-like [Asparagus officinalis]	13.9166	22.2457	61.3393	12.3114	13.2363	13.7495	2.48113	1.311	up
ko04016	MAPK signaling pathway - plant	0.000105718	MSTRG.2708	HHC003738	K13424	NA	WRKY transcription factor WRKY24-like [Phoenix dactylifera];PREDICTED: WRKY transcription factor WRKY24 [Elaeis guineensis]	1194.32	759.415	1762.7	136.763	136.521	142.879	8.93023	3.1587	up
ko04016	MAPK signaling pathway - plant	0.000105718	MSTRG.27419	HHC034361	K13424	NA	uncharacterized protein A4U43_C07F12770 [Asparagus officinalis]	46.7494	30.9137	30.4677	4.78936	4.8353	4.55181	7.62749	2.93121	up
ko04016	MAPK signaling pathway - plant	0.000105718	MSTRG.27436	HHC034385	K13425	NA	DNA-binding WRKY [Cinnamomum micranthum f. kanehirae]	1.77609	1.04981	6.28174	0.333198	0.453263	0.460096	7.30624	2.86913	up
ko04016	MAPK signaling pathway - plant	0.000105718	MSTRG.27827	HHC034996	K13425	NA	PREDICTED: WRKY transcription factor WRKY51-like [Elaeis guineensis]	187.364	184.034	249.494	80.2954	74.4827	73.6927	2.7176	1.44233	up
ko04016	MAPK signaling pathway - plant	0.000105718	MSTRG.2833	HHC003937	K20557	NA	transcription factor RF2b-like isoform X1 [Phoenix dactylifera];transcription factor RF2b-like isoform X2 [Phoenix dactylifera]	5.74148	4.25433	5.15768	13.1109	12.8151	14.0535	0.379032	-1.39961	down
ko04016	MAPK signaling pathway - plant	0.000105718	MSTRG.28476	HHC035869	K14514	NA	phosphate transporter PHO1 [Asparagus officinalis]	99.6845	99.9589	188.284	34.5918	38.5066	37.7702	3.49898	1.80694	up
ko04016	MAPK signaling pathway - plant	0.000105718	MSTRG.28785	HHC036327	K14497	EC:3.1.3.16	PREDICTED: probable protein phosphatase 2C 75 [Musa acuminata subsp. malaccensis]	1.11845	1.30147	6.45412	0.778932	0.820649	0.786488	3.71911	1.89496	up
ko04016	MAPK signaling pathway - plant	0.000105718	MSTRG.2983	HHC004176	K02183	NA	PREDICTED: uncharacterized hydrolase C22A12.06c [Musa acuminata subsp. malaccensis]	111.019	37.279	14.1161	19.2001	18.73	20.8323	2.76391	1.46671	up
ko04016	MAPK signaling pathway - plant	0.000105718	MSTRG.30064	HHC038213	K20604	EC:2.7.12.2	mitogen-activated protein kinase kinase 9-like [Phoenix dactylifera]	188.992	284.34	299.782	50.0016	62.6757	62.0121	4.42565	2.14589	up
ko04016	MAPK signaling pathway - plant	0.000105718	MSTRG.30326	HHC038638	K13447	EC:1.6.3.-;EC:1.11.1.-	respiratory burst oxidase homolog protein A [Phoenix dactylifera]	63.7017	47.2617	56.205	14.0161	13.5947	14.2728	3.99126	1.99684	up
ko04016	MAPK signaling pathway - plant	0.000105718	MSTRG.30775	HHC039295	K13422	NA	transcription factor MYC2 [Phoenix dactylifera]	82.2939	90.5697	112.105	32.8642	36.0935	33.2606	2.78785	1.47915	up
ko04016	MAPK signaling pathway - plant	0.000105718	MSTRG.30900	HHC039445	K13422	NA	transcription factor EAT1-like isoform X1 [Asparagus officinalis]	53.4935	4.56433	9.98112	3.36832	5.14643	4.40317	5.26702	2.39699	up
ko04016	MAPK signaling pathway - plant	0.000105718	MSTRG.30983	HHC039559	K02183	NA	probable calcium-binding protein CML30 [Phalaenopsis equestris]	52.8709	39.012	47.7239	23.8929	18.248	20.3445	2.23423	1.15978	up
ko04016	MAPK signaling pathway - plant	0.000105718	MSTRG.30984	HHC039560	K02183	NA	putative calcium-binding protein [Ananas comosus]	72.7135	60.0684	59.7754	17.029	17.378	15.4338	3.86344	1.94989	up
ko04016	MAPK signaling pathway - plant	0.000105718	MSTRG.31255	HHC039913	K02183	NA	polcalcin Cyn d 7-like [Asparagus officinalis]	729.533	405.482	598.079	75.9933	84.7562	76.4802	7.30555	2.86899	up
ko04016	MAPK signaling pathway - plant	0.000105718	MSTRG.3149	HHC004484	K13424	NA	uncharacterized protein A4U43_C07F12770 [Asparagus officinalis];LOW QUALITY PROTEIN: probable WRKY transcription factor 48 [Asparagus officinalis]	13.4652	7.53435	8.35378	2.58716	2.76876	2.41332	3.77815	1.91768	up
ko04016	MAPK signaling pathway - plant	0.000105718	MSTRG.31757	HHC040497	K13420	EC:2.7.11.1	LRR receptor-like serine/threonine-protein kinase FLS2 [Asparagus officinalis]	40.9929	34.0842	17.2714	14.7965	12.8489	9.58527	2.48044	1.3106	up
ko04016	MAPK signaling pathway - plant	0.000105718	MSTRG.31797	HHC050977	K13422	NA	PREDICTED: transcription factor bHLH51-like [Elaeis guineensis]	145.669	118.02	98.4597	30.5673	28.5166	32.8175	3.94062	1.97842	up
ko04016	MAPK signaling pathway - plant	0.000105718	MSTRG.32555	HHC051229	K14497	EC:3.1.3.16	probable protein phosphatase 2C 24 [Phoenix dactylifera]	12.9176	11.8984	28.7484	3.08487	3.01631	3.13728	5.79798	2.53555	up
ko04016	MAPK signaling pathway - plant	0.000105718	MSTRG.32642	HHC052843	K17686	EC:3.6.3.54	LOW QUALITY PROTEIN: copper-transporting ATPase RAN1-like [Asparagus officinalis]	120.694	106.56	170.082	51.1803	48.7988	47.8911	2.68706	1.42603	up
ko04016	MAPK signaling pathway - plant	0.000105718	MSTRG.32753	HHC048499	K13447	EC:1.6.3.-;EC:1.11.1.-	respiratory burst oxidase homolog protein C-like isoform X1 [Phoenix dactylifera]	164.641	112.646	198.393	11.4492	11.0151	13.0601	13.3903	3.74311	up
ko04016	MAPK signaling pathway - plant	0.000105718	MSTRG.32917	HHC050085	K13425	NA	transcription factor WRKYJ2, partial [Narcissus hybrid cultivar]	77.482	101.971	87.3873	30.4176	21.979	24.819	3.45578	1.78901	up
ko04016	MAPK signaling pathway - plant	0.000105718	MSTRG.333	HHC000377	K13424	NA	probable WRKY transcription factor 72 isoform X1 [Phoenix dactylifera]	1.87956	3.38479	4.00757	1.17365	1.28564	1.61783	2.27413	1.18532	up
ko04016	MAPK signaling pathway - plant	0.000105718	MSTRG.33440	HHC048196	K20557	NA	PREDICTED: probable transcription factor PosF21 [Elaeis guineensis]	1.91279	0.615592	1.01067	3.69997	4.41276	4.51749	0.280205	-1.83545	down
ko04016	MAPK signaling pathway - plant	0.000105718	MSTRG.33504	HHC053186	K20718	EC:2.7.11.1	PREDICTED: probably inactive leucine-rich repeat receptor-like protein kinase At2g25790 [Elaeis guineensis]	4.19648	1.52906	0.675745	18.3576	20.241	18.8763	0.111375	-3.1665	down
ko04016	MAPK signaling pathway - plant	0.000105718	MSTRG.33747	HHC050844	K20772	EC:4.4.1.14	1-aminocyclopropane-1-carboxylic acid synthase [Narcissus tazetta subsp. chinensis];Myristoylated alanine-rich C-kinase [Actinidia chinensis var. chinensis]	121.088	23.8658	77.2079	24.0595	23.1118	23.3939	3.14832	1.65458	up
ko04016	MAPK signaling pathway - plant	0.000105718	MSTRG.33777	HHC049446	K14514	NA	hypothetical protein BHE74_00000428 [Ensete ventricosum]	54.8059	54.779	60.6803	25.6485	30.2925	12.4149	2.49086	1.31665	up
ko04016	MAPK signaling pathway - plant	0.000105718	MSTRG.34049	HHC053575	K14497	EC:3.1.3.16	PREDICTED: probable protein phosphatase 2C 75 [Musa acuminata subsp. malaccensis]	9.38582	3.29489	45.2855	6.9374	3.96279	4.57838	3.74493	1.90494	up
ko04016	MAPK signaling pathway - plant	0.000105718	MSTRG.34671	HHC049496	K20604	EC:2.7.12.2	mitogen-activated protein kinase kinase 9-like [Phoenix dactylifera]	37.8552	18.9303	36.5464	7.10136	6.09591	5.92041	4.88197	2.28746	up
ko04016	MAPK signaling pathway - plant	0.000105718	MSTRG.34882	HHC051100	K20538	EC:2.7.11.24	mitogen-activated protein kinase 16-like [Asparagus officinalis]	21.5474	31.8702	23.65	83.4484	82.3413	81.4506	0.311711	-1.68172	down
ko04016	MAPK signaling pathway - plant	0.000105718	MSTRG.35482	HHC052959	K17686	EC:3.6.3.54	probable copper-transporting ATPase HMA5 [Asparagus officinalis]	4.70368	4.45716	13.6699	1.36894	1.26512	1.73407	5.22666	2.38589	up
ko04016	MAPK signaling pathway - plant	0.000105718	MSTRG.35914	HHC049995	K13416	EC:2.7.10.1;EC:2.7.11.1	LRR receptor kinase BAK1-like [Asparagus officinalis]	267.33	115.248	382.606	39.6831	45.0427	39.5162	6.15882	2.62265	up
ko04016	MAPK signaling pathway - plant	0.000105718	MSTRG.36028	HHC052429	K20728	NA	acid phosphatase 1-like [Phoenix dactylifera]	59.8603	30.3302	23.8944	257.523	262.279	275.136	0.143514	-2.80073	down
ko04016	MAPK signaling pathway - plant	0.000105718	MSTRG.36148	HHC047615	K20725	NA	PREDICTED: protein MKS1-like [Elaeis guineensis]	8.17144	8.97185	19.9836	3.53863	6.26115	4.50976	2.59455	1.37549	up
ko04016	MAPK signaling pathway - plant	0.000105718	MSTRG.4010	HHC005915	K13424	NA	WRKY transcription factor WRKY24-like [Phoenix dactylifera]	30.6951	10.7478	61.3637	1.59472	2.59467	2.75555	14.8031	3.88783	up
ko04016	MAPK signaling pathway - plant	0.000105718	MSTRG.4026	HHC005937	K13413	EC:2.7.12.2	Error-prone DNA polymerase [Gossypium arboreum]	10.7496	8.95339	5.92219	1.59083	2.04508	1.56367	4.92831	2.30109	up
ko04016	MAPK signaling pathway - plant	0.000105718	MSTRG.4158	HHC006094	K14497	EC:3.1.3.16	PREDICTED: probable protein phosphatase 2C 24 [Elaeis guineensis];probable protein phosphatase 2C 24 [Phoenix dactylifera]	760.866	536.448	1565.71	151.17	142.721	146.264	6.50459	2.70146	up
ko04016	MAPK signaling pathway - plant	0.000105718	MSTRG.4290	HHC040588	K02183	NA	PREDICTED: calmodulin-like protein 5 [Elaeis guineensis]	72.1401	144.99	31.9538	21.8449	21.7813	19.0018	3.9772	1.99175	up
ko04016	MAPK signaling pathway - plant	0.000105718	MSTRG.4398	HHC040774	K13413	EC:2.7.12.2	protein LIGHT-DEPENDENT SHORT HYPOCOTYLS 6-like [Coffea arabica]	5.89881	5.35702	2.31459	1.23837	0.85331	0.992086	4.4006	2.1377	up
ko04016	MAPK signaling pathway - plant	0.000105718	MSTRG.463	HHC000526	K20728	NA	hypothetical protein VITISV_000612 [Vitis vinifera];PREDICTED: acid phosphatase 1 [Elaeis guineensis]	16.2555	85.3086	12.3289	2.35059	1.87987	2.09737	17.9987	4.16982	up
ko04016	MAPK signaling pathway - plant	0.000105718	MSTRG.464	HHC000528	K20728	NA	PREDICTED: acid phosphatase 1 [Vitis vinifera]	85.4778	82.6119	7.80091	1.94249	2.04986	3.93808	22.1792	4.47114	up
ko04016	MAPK signaling pathway - plant	0.000105718	MSTRG.465	HHC000531	K20728	NA	acid phosphatase 1-like isoform X1 [Ananas comosus]	20.9531	10.6761	38.0939	6.98778	9.30119	8.75526	2.784	1.47716	up
ko04016	MAPK signaling pathway - plant	0.000105718	MSTRG.4667	HHC041292	K13420	EC:2.7.11.1	uncharacterized protein A4U43_C07F17830 [Asparagus officinalis]	2.108	2.62291	3.56035	1.00883	1.02005	1.02635	2.71379	1.44031	up
ko04016	MAPK signaling pathway - plant	0.000105718	MSTRG.4925	HHC041703	K13424	NA	LOW QUALITY PROTEIN: probable WRKY transcription factor 48 [Asparagus officinalis]	38.9349	22.4331	27.4146	2.90699	2.70981	2.48019	10.9649	3.45482	up
ko04016	MAPK signaling pathway - plant	0.000105718	MSTRG.4944	HHC041738	K13425	NA	DNA-binding WRKY [Cinnamomum micranthum f. kanehirae]	3.21213	6.86751	8.23376	0.224409	0.526213	0.75374	12.1735	3.60568	up
ko04016	MAPK signaling pathway - plant	0.000105718	MSTRG.5088	HHC041968	K17686	EC:3.6.3.54	probable copper-transporting ATPase HMA5 [Asparagus officinalis];uncharacterized protein A4U43_C05F30580 [Asparagus officinalis]	34.1053	27.7302	109.403	12.5032	12.1501	12.1954	4.64706	2.21632	up
ko04016	MAPK signaling pathway - plant	0.000105718	MSTRG.5299	HHC042275	K13424	NA	probable WRKY transcription factor 4 isoform X3 [Asparagus officinalis];PREDICTED: probable WRKY transcription factor 4 [Elaeis guineensis]	17.6687	17.4718	28.1274	10.6754	10.6149	9.39692	2.0617	1.04384	up
ko04016	MAPK signaling pathway - plant	0.000105718	MSTRG.5358	HHC042359	K13425	NA	PREDICTED: WRKY transcription factor WRKY51 [Elaeis guineensis]	285.403	296.933	369.756	118.076	117.564	124.776	2.64165	1.40144	up
ko04016	MAPK signaling pathway - plant	0.000105718	MSTRG.5651	HHC042749	K20725	NA	nuclear speckle RNA-binding protein B-like [Asparagus officinalis]	21.4801	25.9059	44.3009	6.79979	2.574	4.21991	6.7448	2.75378	up
ko04016	MAPK signaling pathway - plant	0.000105718	MSTRG.6018	HHC043285	K13413	EC:2.7.12.2	hypothetical protein DCAR_002318 [Daucus carota subsp. sativus]	0.701312	0.216892	0.0001	5.54502	6.25522	6.17606	0.0510841	-4.29098	down
ko04016	MAPK signaling pathway - plant	0.000105718	MSTRG.6090	HHC043385	K03781	EC:1.11.1.6	PREDICTED: catalase isozyme A [Musa acuminata subsp. malaccensis]	526.088	348.186	1088.65	158.447	171.146	164.852	3.96995	1.98912	up
ko04016	MAPK signaling pathway - plant	0.000105718	MSTRG.6267	HHC043614	K20547	EC:3.2.1.14	chitinase, partial [Allium sativum]	146.64	39.6192	160.226	19.9062	16.168	18.79	6.31534	2.65886	up
ko04016	MAPK signaling pathway - plant	0.000105718	MSTRG.6301	HHC043658	K17686	EC:3.6.3.54	probable copper-transporting ATPase HMA5 isoform X1 [Asparagus officinalis]	1.3886	0.0001	0.215331	2.32922	2.66647	2.04113	0.227948	-2.13322	down
ko04016	MAPK signaling pathway - plant	0.000105718	MSTRG.6360	HHC043741	K14516	NA	ethylene-responsive transcription factor 1B-like [Asparagus officinalis]	4.0845	3.29518	3.37107	0.717325	0.274176	0.389484	7.78484	2.96067	up
ko04016	MAPK signaling pathway - plant	0.000105718	MSTRG.6634	HHC044110	K13416	EC:2.7.10.1;EC:2.7.11.1	LRR receptor kinase BAK1-like [Asparagus officinalis]	50.8525	41.5378	57.3064	8.63426	5.87367	8.86447	6.40485	2.67917	up
ko04016	MAPK signaling pathway - plant	0.000105718	MSTRG.6878	HHC044455	K20538	EC:2.7.11.24	mitogen-activated protein kinase 16-like [Asparagus officinalis]	12.8996	13.5853	7.47451	41.1962	42.9531	42.3461	0.268464	-1.8972	down
ko04016	MAPK signaling pathway - plant	0.000105718	MSTRG.7231	HHC044822	K14516	NA	PREDICTED: ethylene-responsive transcription factor 1B-like [Eucalyptus grandis]	4.94046	6.69537	4.6546	2.04549	2.34067	1.77812	2.64271	1.40202	up
ko04016	MAPK signaling pathway - plant	0.000105718	MSTRG.7410	HHC045086	K14498	EC:2.7.11.1	serine/threonine-protein kinase SAPK10 [Asparagus officinalis]	93.5338	78.758	140.134	42.6656	40.9617	44.2571	2.44303	1.28867	up
ko04016	MAPK signaling pathway - plant	0.000105718	MSTRG.7511	HHC045277	K20553	EC:3.1.13.-	PREDICTED: FRIGIDA-like protein 1 [Elaeis guineensis]	26.1186	32.0988	21.6199	69.1416	67.6285	64.2412	0.397178	-1.33214	down
ko04016	MAPK signaling pathway - plant	0.000105718	MSTRG.7808	HHC045829	K13416	EC:2.7.10.1;EC:2.7.11.1	PREDICTED: receptor like protein kinase S.2 [Elaeis guineensis]	15.234	12.4432	10.5486	4.82315	4.20712	5.24311	2.67811	1.42122	up
ko04016	MAPK signaling pathway - plant	0.000105718	MSTRG.8086	HHC046435	K20728	NA	acid phosphatase 1-like [Phoenix dactylifera]	42.7178	25.1061	20.7988	76.623	73.4149	66.9501	0.408422	-1.29187	down
ko04016	MAPK signaling pathway - plant	0.000105718	MSTRG.8236	HHC046672	K14515	NA	hypothetical protein BHE74_00046053, partial [Ensete ventricosum]	5.47852	17.375	4.42697	1.69036	1.35084	1.88206	5.54115	2.47019	up
ko04016	MAPK signaling pathway - plant	0.000105718	MSTRG.847	HHC001013	K20716	NA	PREDICTED: mitogen-activated protein kinase kinase kinase 2-like [Elaeis guineensis]	84.9246	75.1355	137.597	15.3245	15.8356	16.4549	6.25134	2.64417	up
ko04016	MAPK signaling pathway - plant	0.000105718	MSTRG.8534	HHC047109	K00940	EC:2.7.4.6	protein FAM135B-like isoform X1 [Asparagus officinalis]	6.86377	5.23457	3.76844	12.1294	15.1161	10.6087	0.419154	-1.25445	down
ko04016	MAPK signaling pathway - plant	0.000105718	MSTRG.8540	HHC047115	K00940	EC:2.7.4.6	protein FAM135B-like isoform X1 [Asparagus officinalis];uncharacterized protein LOC109823718 isoform X3 [Asparagus officinalis]	35.3382	37.9316	44.4179	78.9673	84.6413	91.3584	0.46158	-1.11535	down
ko04016	MAPK signaling pathway - plant	0.000105718	MSTRG.8729	HHC006272	K14497	EC:3.1.3.16	probable protein phosphatase 2C 24 [Phoenix dactylifera];hypothetical protein AQUCO_00900891v1 [Aquilegia coerulea]	1872.29	949.724	3372.29	182.875	179.7	165.373	11.7328	3.55248	up
ko04016	MAPK signaling pathway - plant	0.000105718	MSTRG.8918	HHC006503	K13424	NA	WRKY transcription factor WRKY24-like [Phoenix dactylifera]	14.9131	6.80898	42.2255	1.94225	2.05416	2.18926	10.338	3.36989	up
ko04016	MAPK signaling pathway - plant	0.000105718	MSTRG.9353	HHC007097	K14514	NA	protein ETHYLENE INSENSITIVE 3-like [Asparagus officinalis]	4.36657	4.22267	3.80174	1.96801	2.24252	1.08422	2.34024	1.22666	up
ko04016	MAPK signaling pathway - plant	0.000105718	MSTRG.9354	HHC007104	K14514	NA	protein ETHYLENE INSENSITIVE 3-like [Asparagus officinalis]	2.24385	1.93007	3.58471	1.02934	1.68325	0.776918	2.22341	1.15278	up
ko04016	MAPK signaling pathway - plant	0.000105718	MSTRG.9590	HHC007555	K13447	EC:1.6.3.-;EC:1.11.1.-	uncharacterized protein LOC109837500 isoform X1 [Asparagus officinalis];PREDICTED: OTU domain-containing protein 5 isoform X1 [Elaeis guineensis];uncharacterized protein LOC109708688 [Ananas comosus]	12.0775	8.78462	6.80282	1.96053	1.434	1.40784	5.76067	2.52624	up
ko04016	MAPK signaling pathway - plant	0.000105718	MSTRG.9862	HHC008132	K02183	NA	PREDICTED: protein RETICULATA-RELATED 4, chloroplastic-like [Musa acuminata subsp. malaccensis]	15.4459	19.4158	7.0697	40.2708	43.5335	40.4605	0.337436	-1.56731	down
ko04016	MAPK signaling pathway - plant	0.000105718	MSTRG.9898	HHC008233	K20557	NA	transcription factor RF2b-like isoform X1 [Phoenix dactylifera]	45.9932	41.4125	54.3091	116.733	130.115	116.746	0.38976	-1.35934	down
ko04016	MAPK signaling pathway - plant	0.000105718	MSTRG.9941	HHC008318	K20716	NA	PREDICTED: mitogen-activated protein kinase kinase kinase 2-like [Elaeis guineensis];mitogen-activated protein kinase kinase kinase 18-like [Phoenix dactylifera]	3.65904	1.02887	10.5103	0.929307	0.839352	0.890629	5.71516	2.51479	up
ko04016	MAPK signaling pathway - plant	0.000105718	MSTRG.9977	HHC008406	K13424	NA	WRKY transcription factor WRKY24-like [Phoenix dactylifera]	1120.13	843.386	1997.26	160.406	164.71	162.29	8.12622	3.02258	up
ko04075	Plant hormone signal transduction	0.000118027	gene-HHC001728	HHC001728	K14484	NA	auxin-responsive protein IAA25-like isoform X1 [Asparagus officinalis]	1.73083	6.67096	11.8541	2.32153	2.62162	2.87988	2.58927	1.37254	up
ko04075	Plant hormone signal transduction	0.000118027	gene-HHC003124	HHC003124	K14517	NA	PREDICTED: ethylene-responsive transcription factor 2 [Vitis vinifera]	0.0001	0.0001	0.0001	1.2059	0.737028	1.75906	8.10375e-05	-13.5911	down
ko04075	Plant hormone signal transduction	0.000118027	gene-HHC004255	HHC004255	K14491	NA	putative transcription factor RL9 [Capsicum baccatum]	0.138359	0.0434182	0.0175889	1.39362	1.03155	1.04995	0.0573694	-4.12357	down
ko04075	Plant hormone signal transduction	0.000118027	gene-HHC005801	HHC005801	K14494	NA	protein SCARECROW [Phalaenopsis equestris];PREDICTED: protein SCARECROW 2-like [Elaeis guineensis]	3.35202	2.05313	1.88918	17.7298	24.7395	19.8332	0.117079	-3.09444	down
ko04075	Plant hormone signal transduction	0.000118027	gene-HHC006700	HHC006700	K14499	NA	probable membrane-associated kinase regulator 1 [Asparagus officinalis]	0.0001	0.602983	0.0624491	4.87043	4.77206	5.60894	0.0436374	-4.51829	down
ko04075	Plant hormone signal transduction	0.000118027	gene-HHC009778	HHC009778	K14484	NA	auxin-responsive protein IAA33 [Setaria italica]	0.406929	0.164989	0.107813	1.10866	0.739951	1.18171	0.22431	-2.15644	down
ko04075	Plant hormone signal transduction	0.000118027	gene-HHC010510	HHC010510	K13415	EC:2.7.10.1;EC:2.7.11.1	LOW QUALITY PROTEIN: calmodulin-binding receptor kinase CaMRLK-like [Phoenix dactylifera]	3.43735	1.68128	3.84908	1.32354	1.10571	1.20443	2.46795	1.30331	up
ko04075	Plant hormone signal transduction	0.000118027	gene-HHC013016	HHC013016	K13464	NA	PREDICTED: protein TIFY 10a [Elaeis guineensis]	1.10751	0.430509	0.884897	0.16273	0.131466	0.332908	3.86367	1.94997	up
ko04075	Plant hormone signal transduction	0.000118027	gene-HHC014408	HHC014408	K13422	NA	transcription factor ICE1 [Amborella trichopoda]	4.34411	2.12385	0.0001	18.3483	19.8146	14.5556	0.122691	-3.0269	down
ko04075	Plant hormone signal transduction	0.000118027	gene-HHC016039	HHC016039	K14486	NA	PREDICTED: auxin response factor 17-like [Daucus carota subsp. sativus]	4.12438	2.57561	1.98287	1.10327	0.377688	1.0663	3.40871	1.76923	up
ko04075	Plant hormone signal transduction	0.000118027	gene-HHC016490	HHC016490	K14488	NA	PREDICTED: auxin-responsive protein SAUR36-like [Elaeis guineensis]	1.15193	0.450256	1.46415	0.247395	0.38716	0.24589	3.48271	1.80021	up
ko04075	Plant hormone signal transduction	0.000118027	gene-HHC017277	HHC017277	K13422	NA	TT8L [Freesia hybrid cultivar]	1.58993	0.0809508	0.612876	0.0803199	0.0001	0.0001	28.3626	4.82592	up
ko04075	Plant hormone signal transduction	0.000118027	gene-HHC017728	HHC017728	K14491	NA	PREDICTED: probable transcription factor KAN4 [Elaeis guineensis]	1.41821	1.24172	1.85883	3.35249	3.82313	3.23667	0.433984	-1.20429	down
ko04075	Plant hormone signal transduction	0.000118027	gene-HHC021368	HHC021368	K14488	NA	uncharacterized protein A4U43_C04F11010 [Asparagus officinalis]	0.441485	0.357872	0.144276	1.23387	1.01925	1.00129	0.289956	-1.7861	down
ko04075	Plant hormone signal transduction	0.000118027	gene-HHC022171	HHC022171	K14500	EC:2.7.11.1	uncharacterized protein A4U43_C07F31400 [Asparagus officinalis]	0.360485	0.467797	0.291152	1.10049	1.01913	1.08123	0.349731	-1.51568	down
ko04075	Plant hormone signal transduction	0.000118027	gene-HHC022197	HHC022197	K13449	NA	PREDICTED: pathogenesis-related protein PRB1-3-like [Elaeis guineensis]	0.0001	0.0001	0.0001	0.584565	0.54678	0.615823	0.000171706	-12.5078	down
ko04075	Plant hormone signal transduction	0.000118027	gene-HHC023656	HHC023656	K14491	NA	two-component response regulator ORR26-like [Asparagus officinalis]	2.47374	1.73791	1.91203	0.926274	0.690399	0.988672	2.35043	1.23292	up
ko04075	Plant hormone signal transduction	0.000118027	gene-HHC023662	HHC023662	K14494	NA	LOW QUALITY PROTEIN: DELLA protein GAI1-like [Asparagus officinalis]	0.070228	0.310003	0.452441	1.0513	0.84493	0.887782	0.299091	-1.74134	down
ko04075	Plant hormone signal transduction	0.000118027	gene-HHC027936	HHC027936	K14487	NA	indole-3-acetic acid-amido synthetase GH3.17-like [Phoenix dactylifera]	1.21811	0.283643	0.0001	6.91442	7.28159	6.71795	0.0718111	-3.79965	down
ko04075	Plant hormone signal transduction	0.000118027	gene-HHC028437	HHC028437	K14491	NA	myb family transcription factor EFM-like [Asparagus officinalis]	1.21485	0.637271	2.17997	0.200469	0.0001	0.297832	8.09005	3.01615	up
ko04075	Plant hormone signal transduction	0.000118027	gene-HHC032553	HHC032553	K14491	NA	transcription repressor KAN1 isoform X2 [Asparagus officinalis]	0.0368706	0.0001	0.0001	0.433003	0.749274	0.453773	0.0226586	-5.4638	down
ko04075	Plant hormone signal transduction	0.000118027	gene-HHC035329	HHC035329	K14432	NA	PREDICTED: protein ABSCISIC ACID-INSENSITIVE 5-like [Musa acuminata subsp. malaccensis]	0.0001	0.128777	0.0001	1.15645	1.02545	1.44785	0.0355333	-4.81468	down
ko04075	Plant hormone signal transduction	0.000118027	gene-HHC035899	HHC035899	K13413	EC:2.7.12.2	hypothetical protein DCAR_002318 [Daucus carota subsp. sativus]	0.0445122	0.0276843	0.0001	0.44935	0.790045	0.557145	0.0402421	-4.63515	down
ko04075	Plant hormone signal transduction	0.000118027	gene-HHC035900	HHC035900	K13413	EC:2.7.12.2	protein LIGHT-DEPENDENT SHORT HYPOCOTYLS 3-like protein [Cinnamomum micranthum f. kanehirae]	0.773953	0.54054	0.0001	0.0513294	0.0641623	0.0001	11.3727	3.50751	up
ko04075	Plant hormone signal transduction	0.000118027	gene-HHC037964	HHC037964	K13415	EC:2.7.10.1;EC:2.7.11.1	uncharacterized protein A4U43_C03F11510 [Asparagus officinalis]	0.73473	0.694368	0.112337	4.65214	5.46154	5.16197	0.100908	-3.30889	down
ko04075	Plant hormone signal transduction	0.000118027	gene-HHC038805	HHC038805	K14497	EC:3.1.3.16	protein phosphatase 2C 53-like isoform X1 [Phoenix dactylifera]	3.14358	3.68235	4.17094	1.84037	1.07721	0.93117	2.85726	1.51463	up
ko04075	Plant hormone signal transduction	0.000118027	gene-HHC039227	HHC039227	K14486	NA	auxin response factor 11 [Asparagus officinalis]	24.8176	17.0172	8.24847	41.8327	41.2563	41.8832	0.400755	-1.31921	down
ko04075	Plant hormone signal transduction	0.000118027	gene-HHC040080	HHC040080	K14491	NA	PREDICTED: transcription repressor KAN1-like isoform X3 [Elaeis guineensis]	0.888165	1.13891	0.434944	7.32785	7.63598	6.37831	0.115359	-3.11579	down
ko04075	Plant hormone signal transduction	0.000118027	gene-HHC041378	HHC041378	K14498	EC:2.7.11.1	protein ABCI12, chloroplastic [Asparagus officinalis]	0.947897	0.555156	0.385248	2.02902	1.87397	2.08347	0.315429	-1.66461	down
ko04075	Plant hormone signal transduction	0.000118027	gene-HHC042670	HHC042670	K14432	NA	PREDICTED: protein ABSCISIC ACID-INSENSITIVE 5-like [Musa acuminata subsp. malaccensis]	1.41828	0.387476	1.622	0.367588	0.272956	0.408995	3.26597	1.70751	up
ko04075	Plant hormone signal transduction	0.000118027	gene-HHC043765	HHC043765	K14497	EC:3.1.3.16	PREDICTED: probable protein phosphatase 2C 37 [Musa acuminata subsp. malaccensis]	5.94917	4.70416	9.49196	2.26052	3.50403	3.51899	2.17	1.1177	up
ko04075	Plant hormone signal transduction	0.000118027	gene-HHC044548	HHC044548	K14497	EC:3.1.3.16	hypothetical protein B296_00058882 [Ensete ventricosum]	0.210814	0.45791	0.639647	0.110498	0.0911067	0.0623383	4.95703	2.30948	up
ko04075	Plant hormone signal transduction	0.000118027	gene-HHC044569	HHC044569	K14506	EC:6.3.2.52	jasmonic acid-amido synthetase JAR1-like [Asparagus officinalis]	2.35785	0.239501	10.0758	0.223608	0.0001	0.227561	28.0835	4.81165	up
ko04075	Plant hormone signal transduction	0.000118027	gene-HHC044599	HHC044599	K14489	EC:2.7.13.3	probable histidine kinase 2 [Asparagus officinalis]	1.00483	1.03441	1.02884	4.56387	4.02365	3.13326	0.261764	-1.93366	down
ko04075	Plant hormone signal transduction	0.000118027	gene-HHC049134	HHC049134	K14499	NA	PREDICTED: probable membrane-associated kinase regulator 1 [Elaeis guineensis]	0.746839	1.35196	0.17639	16.226	23.741	27.5096	0.0337182	-4.89033	down
ko04075	Plant hormone signal transduction	0.000118027	gene-HHC049987	HHC049987	K14494	NA	PREDICTED: scarecrow-like protein 32 [Elaeis guineensis]	0.469024	0.358595	0.226671	1.48069	1.86655	1.70377	0.208728	-2.2603	down
ko04075	Plant hormone signal transduction	0.000118027	gene-HHC053737	HHC053737	K13415	EC:2.7.10.1;EC:2.7.11.1	PREDICTED: systemin receptor SR160-like [Elaeis guineensis]	5.86516	1.81001	1.48548	10.4905	7.09066	11.7931	0.31186	-1.68103	down
ko04075	Plant hormone signal transduction	0.000118027	MSTRG.1001	HHC001230	K14514	NA	phosphate transporter PHO1-3 [Asparagus officinalis]	2.13132	2.37371	2.68477	0.193502	0.368479	0.294628	8.39333	3.06924	up
ko04075	Plant hormone signal transduction	0.000118027	MSTRG.10167	HHC008703	K14494	NA	LOW QUALITY PROTEIN: scarecrow-like protein 9, partial [Asparagus officinalis]	26.9025	16.8716	31.4661	8.69519	9.12537	10.5577	2.65133	1.40672	up
ko04075	Plant hormone signal transduction	0.000118027	MSTRG.10279	HHC008870	K14498	EC:2.7.11.1	serine/threonine-protein kinase SAPK3-like [Asparagus officinalis]	22.1377	23.6081	64.852	5.32304	4.47138	5.51137	7.22589	2.85317	up
ko04075	Plant hormone signal transduction	0.000118027	MSTRG.10366	HHC009024	K14484	NA	auxin-responsive protein IAA1-like [Asparagus officinalis];PREDICTED: auxin-responsive protein IAA1 [Elaeis guineensis]	421.654	287.946	287.837	79.9583	82.7667	79.7556	4.11347	2.04036	up
ko04075	Plant hormone signal transduction	0.000118027	MSTRG.10713	HHC009578	K14504	EC:2.4.1.207	probable xyloglucan endotransglucosylase/hydrolase protein 25 isoform X1 [Asparagus officinalis]	159.046	49.3684	280.84	8.00315	7.66081	6.85687	21.7245	4.44125	up
ko04075	Plant hormone signal transduction	0.000118027	MSTRG.10715	HHC009568	K14504	EC:2.4.1.207	probable xyloglucan endotransglucosylase/hydrolase protein 23 [Papaver somniferum]	671.921	205.875	416.618	53.735	55.1247	54.7006	7.91399	2.9844	up
ko04075	Plant hormone signal transduction	0.000118027	MSTRG.10724	HHC009577	K14504	EC:2.4.1.207	hypothetical protein B296_00021883 [Ensete ventricosum];probable xyloglucan endotransglucosylase/hydrolase protein 23 [Papaver somniferum]	75.0278	34.7977	33.0509	6.50497	6.1854	4.64786	8.24054	3.04274	up
ko04075	Plant hormone signal transduction	0.000118027	MSTRG.10840	HHC009755	K13413	EC:2.7.12.2	mitogen-activated protein kinase kinase 5-like [Phoenix dactylifera]	283.598	200.949	559.971	98.8925	109.098	99.3732	3.39831	1.76482	up
ko04075	Plant hormone signal transduction	0.000118027	MSTRG.10910	HHC009858	K14488	NA	PREDICTED: auxin-induced protein 15A [Elaeis guineensis]	0.296211	0.867568	0.0001	3.48105	4.61833	5.38438	0.0863171	-3.53421	down
ko04075	Plant hormone signal transduction	0.000118027	MSTRG.11117	HHC010176	K14492	NA	two-component response regulator ORR1-like [Asparagus officinalis]	12.8144	11.6274	2.47612	3.37163	1.80466	2.20382	3.64736	1.86685	up
ko04075	Plant hormone signal transduction	0.000118027	MSTRG.11992	HHC011391	K13415	EC:2.7.10.1;EC:2.7.11.1	hypothetical protein BHE74_00015933 [Ensete ventricosum]	18.3979	11.4252	9.50622	6.30736	4.6571	5.92307	2.3289	1.21965	up
ko04075	Plant hormone signal transduction	0.000118027	MSTRG.12352	HHC011806	K14431	NA	PREDICTED: transcription factor TGA2.2-like isoform X3 [Elaeis guineensis]	36.4794	110.807	47.0251	12.7472	11.0631	12.2924	5.38218	2.42819	up
ko04075	Plant hormone signal transduction	0.000118027	MSTRG.12855	HHC012684	K14432	NA	ABSCISIC ACID-INSENSITIVE 5-like protein 5 [Dendrobium catenatum]	9.07331	7.43099	25.232	5.1982	4.14689	5.04785	2.89978	1.53594	up
ko04075	Plant hormone signal transduction	0.000118027	MSTRG.13028	HHC013015	K13464	NA	protein TIFY 10c-like [Asparagus officinalis]	17.7553	5.3317	15.1379	0.37787	0.273215	0.328201	39.0335	5.28664	up
ko04075	Plant hormone signal transduction	0.000118027	MSTRG.13036	HHC013034	K14488	NA	PREDICTED: auxin-responsive protein SAUR50 [Elaeis guineensis]	0.5914	0.556761	0.759923	10.6136	2.08808	8.70001	0.0891557	-3.48753	down
ko04075	Plant hormone signal transduction	0.000118027	MSTRG.13049	HHC013046	K12126	NA	transcription factor bHLH7-like [Asparagus officinalis]	23.3704	17.8395	49.5804	10.9192	10.4077	10.7233	2.83275	1.5022	up
ko04075	Plant hormone signal transduction	0.000118027	MSTRG.13057	HHC013062	K13464	NA	PREDICTED: protein TIFY 3-like [Musa acuminata subsp. malaccensis]	8.11644	6.10876	5.80561	15.9863	13.852	13.8727	0.458255	-1.12578	down
ko04075	Plant hormone signal transduction	0.000118027	MSTRG.13133	HHC013174	K14488	NA	PREDICTED: auxin-responsive protein SAUR32-like [Musa acuminata subsp. malaccensis]	0.336611	0.24134	0.0882718	0.0501396	0.00918631	0.0439194	6.45282	2.68993	up
ko04075	Plant hormone signal transduction	0.000118027	MSTRG.13175	HHC013243	K13464	NA	PREDICTED: protein TIFY 10a [Elaeis guineensis]	40.0536	22.2203	58.3839	8.44781	8.07758	8.64854	4.79297	2.26092	up
ko04075	Plant hormone signal transduction	0.000118027	MSTRG.13205	HHC013300	K14488	NA	PREDICTED: auxin-responsive protein SAUR71-like [Elaeis guineensis]	21.8721	14.1297	54.6822	2.30318	2.21288	2.14688	13.6102	3.76662	up
ko04075	Plant hormone signal transduction	0.000118027	MSTRG.13519	HHC013734	K14494	NA	LOW QUALITY PROTEIN: chitin-inducible gibberellin-responsive protein 1-like [Asparagus officinalis]	301.026	194.027	361.819	37.6878	37.0996	36.8592	7.67486	2.94014	up
ko04075	Plant hormone signal transduction	0.000118027	MSTRG.13697	HHC013976	K14503	NA	protein BZR1 homolog 3 [Phoenix dactylifera]	151.524	87.7073	162.901	21.1495	20.7635	21.7025	6.3213	2.66022	up
ko04075	Plant hormone signal transduction	0.000118027	MSTRG.1381	HHC001767	K14492	NA	two-component response regulator ORR1-like [Asparagus officinalis]	105.007	99.5704	48.5411	31.931	33.1832	22.3041	2.89548	1.5338	up
ko04075	Plant hormone signal transduction	0.000118027	MSTRG.13994	HHC014372	K14488	NA	auxin-responsive protein SAUR71-like [Phoenix dactylifera]	0.636241	1.9314	3.77259	0.587941	0.678705	0.649026	3.30966	1.72668	up
ko04075	Plant hormone signal transduction	0.000118027	MSTRG.14143	HHC014576	K14431	NA	uncharacterized protein A4U43_C03F17350 [Asparagus officinalis];PREDICTED: transcription factor TGA4 isoform X1 [Elaeis guineensis]	12.5146	11.8728	16.1364	4.59403	4.42307	5.50363	2.79076	1.48066	up
ko04075	Plant hormone signal transduction	0.000118027	MSTRG.14617	HHC015218	K14508	NA	PREDICTED: BTB/POZ domain and ankyrin repeat-containing protein NPR5-like isoform X1 [Elaeis guineensis]	1.3437	0.908907	0.284345	2.41958	2.58625	2.86342	0.322389	-1.63313	down
ko04075	Plant hormone signal transduction	0.000118027	MSTRG.14825	HHC015522	K14495	NA	probable F-box protein At2g36090 [Asparagus officinalis]	14.7962	13.5304	17.8816	6.71111	7.06891	7.83394	2.13789	1.09618	up
ko04075	Plant hormone signal transduction	0.000118027	MSTRG.14892	HHC015607	K14489	EC:2.7.13.3	uncharacterized protein A4U43_C08F11250 [Asparagus officinalis]	26.5239	24.1119	38.1809	9.64275	12.7905	12.9303	2.51153	1.32857	up
ko04075	Plant hormone signal transduction	0.000118027	MSTRG.15619	HHC016501	K14488	NA	auxin-responsive protein SAUR32-like [Phoenix dactylifera]	13.1249	11.6798	11.689	1.86541	1.83672	2.12958	6.25782	2.64566	up
ko04075	Plant hormone signal transduction	0.000118027	MSTRG.15686	HHC016590	K14494	NA	PREDICTED: scarecrow-like protein 28 [Elaeis guineensis]	7.50652	2.80029	1.66077	21.8234	20.1333	20.8389	0.19058	-2.39153	down
ko04075	Plant hormone signal transduction	0.000118027	MSTRG.16097	HHC017122	K13415	EC:2.7.10.1;EC:2.7.11.1	PREDICTED: systemin receptor SR160 [Elaeis guineensis]	17.7209	12.3411	12.5938	37.7613	38.1828	39.5213	0.369425	-1.43665	down
ko04075	Plant hormone signal transduction	0.000118027	MSTRG.16406	HHC017509	K14484	NA	auxin-induced protein 22D-like [Phoenix dactylifera]	5.32324	4.24534	2.66399	15.4571	15.6687	15.8911	0.260174	-1.94245	down
ko04075	Plant hormone signal transduction	0.000118027	MSTRG.16408	HHC017510	K14484	NA	PREDICTED: auxin-responsive protein IAA30 [Elaeis guineensis]	74.7527	8.43718	19.9774	128.638	118.046	121.564	0.280158	-1.83569	down
ko04075	Plant hormone signal transduction	0.000118027	MSTRG.16491	HHC017641	K13449	NA	PREDICTED: pathogenesis-related protein PRB1-3-like [Elaeis guineensis]	2.20919	2.31588	6.15116	0.604024	0.370283	0.733063	6.25303	2.64456	up
ko04075	Plant hormone signal transduction	0.000118027	MSTRG.16493	HHC017652	K13449	NA	PREDICTED: pathogenesis-related protein PRB1-3-like [Elaeis guineensis]	1.08037	0.760368	4.07895	0.0001	0.0001	0.0001	19732.3	14.2683	up
ko04075	Plant hormone signal transduction	0.000118027	MSTRG.16720	HHC017973	K14484	NA	auxin-responsive protein IAA4 [Asparagus officinalis]	22.8667	9.19356	4.83508	1.09506	0.881163	1.23885	11.4757	3.52051	up
ko04075	Plant hormone signal transduction	0.000118027	MSTRG.17161	HHC018541	K14505	NA	cyclin-D3-3-like [Asparagus officinalis]	2.67195	1.57838	0.371183	10.7383	10.2128	9.70547	0.150751	-2.72976	down
ko04075	Plant hormone signal transduction	0.000118027	MSTRG.17173	HHC018564	K14495	NA	F-box protein GID2-like isoform X1 [Phoenix dactylifera]	126.149	123.885	171.654	36.6652	43.3278	35.235	3.6596	1.87169	up
ko04075	Plant hormone signal transduction	0.000118027	MSTRG.17316	HHC018781	K13415	EC:2.7.10.1;EC:2.7.11.1	brassinosteroid LRR receptor kinase BRL1-like [Asparagus officinalis]	11.1381	9.0487	21.7684	5.87746	5.02722	6.53161	2.4062	1.26676	up
ko04075	Plant hormone signal transduction	0.000118027	MSTRG.17377	HHC018877	K14488	NA	uncharacterized protein A4U43_C05F7790 [Asparagus officinalis]	0.0001	0.858103	0.0001	12.2225	12.3567	10.9579	0.0241524	-5.37169	down
ko04075	Plant hormone signal transduction	0.000118027	MSTRG.17408	HHC018925	K13415	EC:2.7.10.1;EC:2.7.11.1	squamosa promoter-binding-like protein 12 [Asparagus officinalis]	86.2055	38.8932	41.9202	114.201	131.293	130.218	0.444538	-1.16962	down
ko04075	Plant hormone signal transduction	0.000118027	MSTRG.17616	HHC019230	K14491	NA	two-component response regulator ORR26-like [Asparagus officinalis]	40.9881	39.2615	24.8476	13.8469	16.3894	15.6432	2.29072	1.1958	up
ko04075	Plant hormone signal transduction	0.000118027	MSTRG.1833	HHC002390	K14504	EC:2.4.1.207	xyloglucan endotransglycosylase XET2 [Asparagus officinalis];probable xyloglucan endotransglucosylase/hydrolase protein 23 [Asparagus officinalis]	136.209	39.4574	123.064	28.947	27.2916	34.7104	3.2846	1.71572	up
ko04075	Plant hormone signal transduction	0.000118027	MSTRG.1835	HHC002392	K14504	EC:2.4.1.207	probable xyloglucan endotransglucosylase/hydrolase protein 23 [Asparagus officinalis]	1179.68	345.118	796.85	174.777	186.283	183.832	4.26076	2.09111	up
ko04075	Plant hormone signal transduction	0.000118027	MSTRG.1838	HHC002393	K14504	EC:2.4.1.207	probable xyloglucan endotransglucosylase/hydrolase protein 25 isoform X1 [Asparagus officinalis]	5.37257	0.865141	1.45679	0.441881	0.314331	0.364336	6.86673	2.77962	up
ko04075	Plant hormone signal transduction	0.000118027	MSTRG.1840	HHC002395	K14504	EC:2.4.1.207	probable xyloglucan endotransglucosylase/hydrolase protein 25 isoform X1 [Asparagus officinalis]	2.31064	0.606607	0.957867	0.313989	0.123907	0.0984406	7.22515	2.85303	up
ko04075	Plant hormone signal transduction	0.000118027	MSTRG.1844	HHC002399	K14504	EC:2.4.1.207	xyloglucan endotransglucosylase/hydrolase protein 24-like [Asparagus officinalis];probable xyloglucan endotransglucosylase/hydrolase protein 23 isoform X2 [Asparagus officinalis]	46.6514	10.9761	19.1174	201.666	193.631	194.351	0.130154	-2.94171	down
ko04075	Plant hormone signal transduction	0.000118027	MSTRG.1847	HHC002400	K14504	EC:2.4.1.207	probable xyloglucan endotransglucosylase/hydrolase protein 25 isoform X1 [Asparagus officinalis];hypothetical protein CUMW_026640, partial [Citrus unshiu]	4.0127	0.897833	1.56296	0.240531	0.173548	0.330944	8.68898	3.11919	up
ko04075	Plant hormone signal transduction	0.000118027	MSTRG.18580	HHC020802	K13422	NA	PREDICTED: transcription factor MYC2 [Musa acuminata subsp. malaccensis]	26.9096	15.912	16.8008	1.23019	0.662766	1.60914	17.0248	4.08957	up
ko04075	Plant hormone signal transduction	0.000118027	MSTRG.18672	HHC020904	K14488	NA	PREDICTED: auxin-responsive protein SAUR36 [Elaeis guineensis]	8.58107	3.86813	16.2889	5.29818	3.39236	4.76956	2.13505	1.09427	up
ko04075	Plant hormone signal transduction	0.000118027	MSTRG.18726	HHC020999	K14494	NA	scarecrow-like protein 6, partial [Asparagus officinalis]	15.2475	11.7479	12.8211	29.5745	29.7605	26.9225	0.461601	-1.11528	down
ko04075	Plant hormone signal transduction	0.000118027	MSTRG.18753	HHC021031	K14488	NA	PREDICTED: auxin-responsive protein SAUR32-like [Elaeis guineensis]	15.2591	15.3633	16.5869	4.99308	4.44878	4.52039	3.38121	1.75754	up
ko04075	Plant hormone signal transduction	0.000118027	MSTRG.19007	HHC021369	K14488	NA	PREDICTED: auxin-responsive protein SAUR71-like [Musa acuminata subsp. malaccensis]	14.2021	3.21378	4.82695	1.55206	2.03162	1.17356	4.67557	2.22514	up
ko04075	Plant hormone signal transduction	0.000118027	MSTRG.19217	HHC021666	K13415	EC:2.7.10.1;EC:2.7.11.1	PREDICTED: systemin receptor SR160-like [Elaeis guineensis]	3.70863	3.39962	1.35016	12.7158	10.5722	9.44325	0.258419	-1.95222	down
ko04075	Plant hormone signal transduction	0.000118027	MSTRG.19495	HHC022033	K14484	NA	auxin-induced protein 22D-like [Phoenix dactylifera]	1.76125	0.319318	0.143038	6.07459	6.14611	8.80285	0.105767	-3.24104	down
ko04075	Plant hormone signal transduction	0.000118027	MSTRG.19497	HHC022036	K14484	NA	PREDICTED: auxin-responsive protein IAA30 [Elaeis guineensis]	26.4268	19.2786	24.8949	267.318	269.973	253.637	0.0892625	-3.4858	down
ko04075	Plant hormone signal transduction	0.000118027	MSTRG.19506	HHC022059	K16189	NA	uncharacterized protein A4U43_C03F5960 [Asparagus officinalis]	0.591913	0.450517	0.312781	1.74077	1.61176	2.049	0.250894	-1.99485	down
ko04075	Plant hormone signal transduction	0.000118027	MSTRG.19517	HHC022078	K13413	EC:2.7.12.2	PREDICTED: protein G1-like1 [Elaeis guineensis]	35.5088	17.9083	18.3303	10.2426	9.56729	9.28565	2.46592	1.30213	up
ko04075	Plant hormone signal transduction	0.000118027	MSTRG.19534	HHC022106	K14488	NA	PREDICTED: auxin-responsive protein SAUR71-like [Elaeis guineensis]	13.0902	6.89385	19.4664	1.50875	1.70515	1.60848	8.18068	3.03222	up
ko04075	Plant hormone signal transduction	0.000118027	MSTRG.19535	HHC022107	K14488	NA	hypothetical protein GW17_00029310 [Ensete ventricosum]	8.06838	2.68749	9.94692	0.218919	0.182705	0.0359502	47.3126	5.56415	up
ko04075	Plant hormone signal transduction	0.000118027	MSTRG.19536	HHC022109	K14488	NA	uncharacterized protein A4U43_C03F6520 [Asparagus officinalis]	146.495	42.7796	66.7438	21.4637	19.549	20.9963	4.12873	2.0457	up
ko04075	Plant hormone signal transduction	0.000118027	MSTRG.19919	HHC022643	K14431	NA	PREDICTED: transcription factor TGA2.2-like isoform X2 [Nelumbo nucifera]	673.895	635.576	1327.57	321.192	326.124	311.811	2.74942	1.45913	up
ko04075	Plant hormone signal transduction	0.000118027	MSTRG.20174	HHC022975	K14505	NA	cyclin-D3-3-like [Asparagus officinalis]	6.6102	2.5986	0.938332	11.9764	13.5441	12.0382	0.270167	-1.88808	down
ko04075	Plant hormone signal transduction	0.000118027	MSTRG.20196	HHC022990	K14495	NA	F-box protein GID2-like isoform X1 [Phoenix dactylifera]	160.336	161.03	274.12	47.7144	41.4209	48.1536	4.33746	2.11685	up
ko04075	Plant hormone signal transduction	0.000118027	MSTRG.20394	HHC023273	K14488	NA	uncharacterized protein A4U43_C05F7790 [Asparagus officinalis]	2.41361	1.78462	0.0001	15.9827	15.4886	18.7442	0.0836063	-3.58024	down
ko04075	Plant hormone signal transduction	0.000118027	MSTRG.20556	HHC023482	K14498	EC:2.7.11.1	serine/threonine-protein kinase SAPK7 [Ornithogalum longebracteatum]	55.6582	25.6832	101.6	28.1002	24.4642	29.569	2.22737	1.15534	up
ko04075	Plant hormone signal transduction	0.000118027	MSTRG.21158	HHC024554	K14488	NA	auxin-responsive protein SAUR32-like [Phoenix dactylifera]	44.4485	26.8601	104.048	3.70838	3.24461	2.91298	17.7739	4.15169	up
ko04075	Plant hormone signal transduction	0.000118027	MSTRG.21864	HHC025537	K14432	NA	ABSCISIC ACID-INSENSITIVE 5-like protein 5 [Dendrobium catenatum]	172.85	159.096	330.706	92.7803	85.2546	88.2441	2.48856	1.31531	up
ko04075	Plant hormone signal transduction	0.000118027	MSTRG.21881	HHC025567	K14499	NA	hypothetical protein B296_00038369 [Ensete ventricosum]	17.061	12.8463	38.7148	3.18086	3.97439	2.02753	7.47291	2.90167	up
ko04075	Plant hormone signal transduction	0.000118027	MSTRG.22092	HHC025942	K14431	NA	PREDICTED: transcription factor TGA4 isoform X2 [Elaeis guineensis]	77.9439	90.9626	161.602	35.6372	31.9499	34.7052	3.23102	1.69199	up
ko04075	Plant hormone signal transduction	0.000118027	MSTRG.22236	HHC026237	K12126	NA	transcription factor UNE12-like [Asparagus officinalis]	45.9876	31.2104	58.138	13.4833	14.8589	14.0681	3.19111	1.67406	up
ko04075	Plant hormone signal transduction	0.000118027	MSTRG.22408	HHC026587	K14516	NA	PREDICTED: ethylene-responsive transcription factor 1B-like [Juglans regia]	14.2669	7.58274	10.7027	2.5124	1.60027	3.03599	4.55363	2.18702	up
ko04075	Plant hormone signal transduction	0.000118027	MSTRG.22830	HHC027301	K14484	NA	PREDICTED: auxin-responsive protein IAA30 [Elaeis guineensis]	16.6445	3.60578	3.4291	83.5312	84.2234	87.4614	0.0927818	-3.43001	down
ko04075	Plant hormone signal transduction	0.000118027	MSTRG.23138	HHC027722	K14431	NA	uncharacterized protein A4U43_C03F17350 [Asparagus officinalis]	43.2995	71.9303	133.357	20.6363	19.2874	18.172	4.27892	2.09725	up
ko04075	Plant hormone signal transduction	0.000118027	MSTRG.23869	HHC028724	K14515	NA	hypothetical protein BHE74_00046053, partial [Ensete ventricosum]	2.45861	3.37096	6.37063	0.285312	0.0001	0.0001	42.7309	5.41721	up
ko04075	Plant hormone signal transduction	0.000118027	MSTRG.2409	HHC003245	K13946	NA	auxin transporter-like protein 4 [Asparagus officinalis]	42.7366	48.1864	13.6059	89.2236	97.7217	83.84	0.386021	-1.37325	down
ko04075	Plant hormone signal transduction	0.000118027	MSTRG.24139	HHC029104	K14498	EC:2.7.11.1	serine/threonine-protein kinase SAPK7-like protein [Ornithogalum longebracteatum]	63.0476	89.4783	60.5221	34.8067	31.4842	38.5025	2.03303	1.02363	up
ko04075	Plant hormone signal transduction	0.000118027	MSTRG.24332	HHC029353	K14431	NA	uncharacterized protein A4U43_C05F12980 [Asparagus officinalis]	10.7073	21.7575	25.3263	2.62746	5.86604	4.70966	4.37706	2.12996	up
ko04075	Plant hormone signal transduction	0.000118027	MSTRG.24470	HHC029529	K14488	NA	PREDICTED: auxin-responsive protein SAUR71-like [Musa acuminata subsp. malaccensis]	5.34103	15.6131	23.0394	3.55549	2.46906	3.71845	4.51539	2.17485	up
ko04075	Plant hormone signal transduction	0.000118027	MSTRG.24720	HHC029862	K14503	NA	protein BZR1 homolog 3 [Phoenix dactylifera]	569.316	435.601	684.536	152.639	163.662	149.242	3.62899	1.85957	up
ko04075	Plant hormone signal transduction	0.000118027	MSTRG.24913	HHC030143	K14494	NA	LOW QUALITY PROTEIN: chitin-inducible gibberellin-responsive protein 1-like [Asparagus officinalis]	65.9023	48.2618	102.033	9.22811	8.67504	8.61002	8.15433	3.02757	up
ko04075	Plant hormone signal transduction	0.000118027	MSTRG.24971	HHC030226	K13415	EC:2.7.10.1;EC:2.7.11.1	hypothetical protein AQUCO_03300055v1 [Aquilegia coerulea];squamosa promoter-binding protein 1 [Asparagus officinalis]	30.381	9.57001	11.1581	5.26461	5.15427	5.851	3.14133	1.65138	up
ko04075	Plant hormone signal transduction	0.000118027	MSTRG.2513	HHC003425	K14494	NA	LOW QUALITY PROTEIN: scarecrow-like protein 9, partial [Asparagus officinalis]	204.842	198.684	301.721	100.107	108.64	111.886	2.19954	1.1372	up
ko04075	Plant hormone signal transduction	0.000118027	MSTRG.25212	HHC030585	K14488	NA	hypothetical protein AQUCO_01400195v1 [Aquilegia coerulea]	3.60657	4.79173	2.87809	0.0672271	0.422887	0.206118	16.1963	4.01759	up
ko04075	Plant hormone signal transduction	0.000118027	MSTRG.25316	HHC030766	K12126	NA	transcription factor bHLH7-like [Asparagus officinalis]	92.3332	78.6746	261.485	22.1665	19.722	25.6653	6.4022	2.67857	up
ko04075	Plant hormone signal transduction	0.000118027	MSTRG.25327	HHC030785	K14488	NA	PREDICTED: auxin-responsive protein SAUR50 [Elaeis guineensis]	7.58783	4.07743	0.0001	48.6452	50.516	41.3715	0.0830082	-3.5906	down
ko04075	Plant hormone signal transduction	0.000118027	MSTRG.25334	HHC030805	K13464	NA	protein TIFY 10c-like [Asparagus officinalis]	4.15058	1.10117	3.54782	0.0377127	0.0001	0.0001	232.101	7.85861	up
ko04075	Plant hormone signal transduction	0.000118027	MSTRG.25519	HHC031085	K14431	NA	transcription factor TGA2.3-like isoform X2 [Ananas comosus]	1.22407	0.546122	0.0001	2.89494	2.91245	3.31327	0.194097	-2.36515	down
ko04075	Plant hormone signal transduction	0.000118027	MSTRG.25545	HHC031120	K14432	NA		37.9826	31.6734	82.3914	17.7257	16.7858	20.3749	2.77022	1.47	up
ko04075	Plant hormone signal transduction	0.000118027	MSTRG.25605	HHC031227	K14498	EC:2.7.11.1	serine/threonine-protein kinase SAPK2-like isoform X1 [Asparagus officinalis]	86.593	108.281	217.054	38.427	39.1334	39.8429	3.50866	1.81092	up
ko04075	Plant hormone signal transduction	0.000118027	MSTRG.26007	HHC031999	K14484	NA	uncharacterized protein A4U43_C05F26870 [Asparagus officinalis]	89.4188	96.1834	222.459	42.8125	32.2768	30.4775	3.86543	1.95063	up
ko04075	Plant hormone signal transduction	0.000118027	MSTRG.26119	HHC032197	K14512	EC:2.7.11.24	PREDICTED: mitogen-activated protein kinase 1 [Musa acuminata subsp. malaccensis]	15.2336	16.1408	12.1448	30.2956	29.5521	31.4851	0.47649	-1.06948	down
ko04075	Plant hormone signal transduction	0.000118027	MSTRG.26158	HHC032276	K14493	EC:3.-.-.-	Alpha/beta hydrolase-3 [Corchorus olitorius]	12.7888	10.5266	32.7188	2.36567	3.86532	2.65079	6.30888	2.65738	up
ko04075	Plant hormone signal transduction	0.000118027	MSTRG.26518	HHC032834	K13415	EC:2.7.10.1;EC:2.7.11.1	squamosa promoter-binding-like protein 3 [Dendrobium catenatum]	5.34624	1.07059	11.9921	1.57698	1.53974	1.04021	4.42848	2.14681	up
ko04075	Plant hormone signal transduction	0.000118027	MSTRG.26667	HHC033050	K14485	NA	protein AUXIN SIGNALING F-BOX 3-like [Asparagus officinalis]	43.2592	46.3011	80.3851	156.915	156.705	157.101	0.361032	-1.4698	down
ko04075	Plant hormone signal transduction	0.000118027	MSTRG.26775	HHC033197	K14496	NA	LOW QUALITY PROTEIN: abscisic acid receptor PYL8-like [Asparagus officinalis]	13.9166	22.2457	61.3393	12.3114	13.2363	13.7495	2.48113	1.311	up
ko04075	Plant hormone signal transduction	0.000118027	MSTRG.27108	HHC033830	K14506	EC:6.3.2.52	jasmonic acid-amido synthetase JAR1-like [Asparagus officinalis]	0.285933	0.657804	0.8517	1.9528	2.44512	1.69102	0.294868	-1.76186	down
ko04075	Plant hormone signal transduction	0.000118027	MSTRG.27152	HHC033920	K14431	NA	hypothetical protein B296_00045157 [Ensete ventricosum]	18.8765	24.1717	31.1432	5.65088	6.97011	5.44497	4.1067	2.03798	up
ko04075	Plant hormone signal transduction	0.000118027	MSTRG.27467	HHC034433	K14491	NA	PREDICTED: two-component response regulator ARR1-like [Elaeis guineensis]	14.1396	13.2187	14.3814	27.861	30.3284	30.8345	0.468859	-1.09277	down
ko04075	Plant hormone signal transduction	0.000118027	MSTRG.27696	HHC034789	K14505	NA	cyclin-D3-3-like [Asparagus officinalis]	3.16682	2.58477	0.0001	11.2286	9.39704	10.3167	0.185884	-2.42752	down
ko04075	Plant hormone signal transduction	0.000118027	MSTRG.27802	HHC034938	K14489	EC:2.7.13.3	histidine kinase 5 [Asparagus officinalis]	14.4322	12.5325	13.6465	28.9914	30.4156	29.643	0.45605	-1.13274	down
ko04075	Plant hormone signal transduction	0.000118027	MSTRG.27804	HHC034945	K14486	NA	PREDICTED: auxin response factor 17-like [Elaeis guineensis]	5.01521	1.42932	2.45561	6.68274	8.27031	9.68182	0.361282	-1.4688	down
ko04075	Plant hormone signal transduction	0.000118027	MSTRG.27863	HHC035036	K14488	NA	PREDICTED: auxin-induced protein 6B-like [Elaeis guineensis]	0.923667	1.17638	0.736069	16.0879	18.2707	14.9752	0.0574882	-4.12059	down
ko04075	Plant hormone signal transduction	0.000118027	MSTRG.28028	HHC035271	K14491	NA	hypothetical protein CRG98_044353 [Punica granatum]	0.600508	0.335776	0.535009	0.162162	0.210592	0.248832	2.367	1.24306	up
ko04075	Plant hormone signal transduction	0.000118027	MSTRG.28328	HHC035661	K14486	NA	auxin response factor 12-like isoform X1 [Phoenix dactylifera]	10.2164	5.08394	2.30922	27.5958	27.0026	26.3459	0.217552	-2.20057	down
ko04075	Plant hormone signal transduction	0.000118027	MSTRG.28476	HHC035869	K14514	NA	phosphate transporter PHO1 [Asparagus officinalis]	99.6845	99.9589	188.284	34.5918	38.5066	37.7702	3.49898	1.80694	up
ko04075	Plant hormone signal transduction	0.000118027	MSTRG.28503	HHC035924	K14517	NA	pathogenesis-related genes transcriptional activator PTI5-like [Phoenix dactylifera]	6.24605	5.48399	6.33007	0.814741	0.700613	0.490395	9.00417	3.17059	up
ko04075	Plant hormone signal transduction	0.000118027	MSTRG.28637	HHC036096	K14486	NA	auxin response factor 12-like isoform X1 [Phoenix dactylifera]	19.9368	10.4903	13.7447	56.1342	55.6029	59.1943	0.258418	-1.95222	down
ko04075	Plant hormone signal transduction	0.000118027	MSTRG.28785	HHC036327	K14497	EC:3.1.3.16	PREDICTED: probable protein phosphatase 2C 75 [Musa acuminata subsp. malaccensis]	1.11845	1.30147	6.45412	0.778932	0.820649	0.786488	3.71911	1.89496	up
ko04075	Plant hormone signal transduction	0.000118027	MSTRG.29090	HHC036722	K14494	NA	Scarecrow-like protein 32 [Ananas comosus]	2.23229	0.905594	0.942696	7.94297	9.13601	7.28556	0.16748	-2.57794	down
ko04075	Plant hormone signal transduction	0.000118027	MSTRG.29118	HHC036750	K14487	NA	PREDICTED: probable indole-3-acetic acid-amido synthetase GH3.8 [Elaeis guineensis]	35.8515	26.076	61.6227	90.0111	95.134	90.6748	0.447938	-1.15863	down
ko04075	Plant hormone signal transduction	0.000118027	MSTRG.29243	HHC036896	K13415	EC:2.7.10.1;EC:2.7.11.1	probable LRR receptor-like serine/threonine-protein kinase At2g16250 [Phoenix dactylifera]	27.5634	13.065	37.6165	65.1901	73.6162	69.4369	0.375738	-1.4122	down
ko04075	Plant hormone signal transduction	0.000118027	MSTRG.2936	HHC004114	K14493	EC:3.-.-.-	PREDICTED: probable carboxylesterase 15 [Elaeis guineensis]	151.962	421.263	127.103	96.5375	111.029	94.026	2.3221	1.21543	up
ko04075	Plant hormone signal transduction	0.000118027	MSTRG.29554	HHC037386	K14491	NA	hypothetical protein CRG98_044353 [Punica granatum]	11.9508	13.1172	18.8023	6.29239	6.93529	6.06109	2.2744	1.18549	up
ko04075	Plant hormone signal transduction	0.000118027	MSTRG.30152	HHC038374	K13464	NA	protein TIFY 10a-like [Dendrobium catenatum]	166.215	93.5225	154.171	62.8389	66.6187	68.3254	2.09274	1.06539	up
ko04075	Plant hormone signal transduction	0.000118027	MSTRG.30440	HHC038812	K14484	NA	uncharacterized protein A4U43_C05F26870 [Asparagus officinalis]	88.8889	80.1313	326.646	26.3658	19.0842	25.1039	7.02535	2.81257	up
ko04075	Plant hormone signal transduction	0.000118027	MSTRG.30548	HHC038987	K14500	EC:2.7.11.1	probable serine/threonine-protein kinase At4g35230 isoform X2 [Asparagus officinalis]	42.8498	47.156	45.1939	90.2225	91.2328	90.7247	0.496729	-1.00947	down
ko04075	Plant hormone signal transduction	0.000118027	MSTRG.30645	HHC039112	K14488	NA	auxin-responsive protein SAUR32-like [Phoenix dactylifera]	8.77866	15.8338	13.5053	2.4401	1.3344	1.59007	7.10547	2.82893	up
ko04075	Plant hormone signal transduction	0.000118027	MSTRG.30734	HHC039241	K14488	NA	PREDICTED: auxin-responsive protein SAUR71-like [Pyrus x bretschneideri]	6.30628	2.38944	0.411021	34.1093	29.0492	35.7781	0.0920463	-3.4415	down
ko04075	Plant hormone signal transduction	0.000118027	MSTRG.30755	HHC039271	K12126	NA	transcription factor UNE12-like [Asparagus officinalis]	13.053	7.34391	10.0551	2.82978	3.34555	2.68591	3.43654	1.78096	up
ko04075	Plant hormone signal transduction	0.000118027	MSTRG.30775	HHC039295	K13422	NA	transcription factor MYC2 [Phoenix dactylifera]	82.2939	90.5697	112.105	32.8642	36.0935	33.2606	2.78785	1.47915	up
ko04075	Plant hormone signal transduction	0.000118027	MSTRG.30900	HHC039445	K13422	NA	transcription factor EAT1-like isoform X1 [Asparagus officinalis]	53.4935	4.56433	9.98112	3.36832	5.14643	4.40317	5.26702	2.39699	up
ko04075	Plant hormone signal transduction	0.000118027	MSTRG.31065	HHC039664	K14431	NA	PREDICTED: transcription factor TGA4 isoform X2 [Elaeis guineensis]	656.664	723.085	1151.35	269.433	269.514	262.003	3.16012	1.65998	up
ko04075	Plant hormone signal transduction	0.000118027	MSTRG.31184	HHC039825	K14485	NA	PREDICTED: transport inhibitor response 1-like protein [Elaeis guineensis]	338.764	338.783	225.856	890.564	853.457	869.341	0.345686	-1.53247	down
ko04075	Plant hormone signal transduction	0.000118027	MSTRG.31253	HHC039911	K14499	NA	PREDICTED: BRI1 kinase inhibitor 1-like [Elaeis guineensis]	9.40814	5.49515	14.4474	0.457541	0.486087	0.848926	16.3737	4.03331	up
ko04075	Plant hormone signal transduction	0.000118027	MSTRG.31425	HHC040135	K13464	NA	protein TIFY 10c-like [Asparagus officinalis]	258.356	105.041	139.313	12.7047	14.8252	5.68083	15.137	3.92001	up
ko04075	Plant hormone signal transduction	0.000118027	MSTRG.31431	HHC040139	K13464	NA	protein TIFY 10c-like [Asparagus officinalis]	281.701	96.9609	233.357	5.2269	10.1748	7.10213	27.1963	4.76534	up
ko04075	Plant hormone signal transduction	0.000118027	MSTRG.31442	HHC040149	K14486	NA	auxin response factor 16 isoform X1 [Asparagus officinalis]	177.196	256.515	488.974	47.7504	45.511	52.4251	6.33336	2.66297	up
ko04075	Plant hormone signal transduction	0.000118027	MSTRG.31731	HHC040469	K14488	NA	hypothetical protein GW17_00035730 [Ensete ventricosum]	2.04988	2.07229	4.66092	1.54525	0.840988	0.705598	2.84074	1.50627	up
ko04075	Plant hormone signal transduction	0.000118027	MSTRG.31797	HHC050977	K13422	NA	PREDICTED: transcription factor bHLH51-like [Elaeis guineensis]	145.669	118.02	98.4597	30.5673	28.5166	32.8175	3.94062	1.97842	up
ko04075	Plant hormone signal transduction	0.000118027	MSTRG.32085	HHC048396	K14492	NA	two-component response regulator ORR1-like [Asparagus officinalis]	11.8585	10.5112	3.79025	2.84911	2.92754	2.68205	3.09267	1.62885	up
ko04075	Plant hormone signal transduction	0.000118027	MSTRG.32555	HHC051229	K14497	EC:3.1.3.16	probable protein phosphatase 2C 24 [Phoenix dactylifera]	12.9176	11.8984	28.7484	3.08487	3.01631	3.13728	5.79798	2.53555	up
ko04075	Plant hormone signal transduction	0.000118027	MSTRG.32578	HHC053160	K13946	NA	auxin transporter-like protein 4 [Asparagus officinalis]	30.4211	28.1574	74.8114	12.2975	6.85756	6.04216	5.29383	2.40431	up
ko04075	Plant hormone signal transduction	0.000118027	MSTRG.3257	HHC004738	K13946	NA	PREDICTED: auxin transporter-like protein 2 [Elaeis guineensis];auxin transporter-like protein 2 [Phoenix dactylifera]	2.99127	1.4387	0.0001	9.99977	8.52572	8.18587	0.16585	-2.59205	down
ko04075	Plant hormone signal transduction	0.000118027	MSTRG.32973	HHC047354	K14489	EC:2.7.13.3	uncharacterized protein A4U43_C08F11250 [Asparagus officinalis]	50.0195	31.558	69.1502	20.233	18.9894	22.9161	2.42567	1.27839	up
ko04075	Plant hormone signal transduction	0.000118027	MSTRG.33092	HHC049549	K14488	NA	auxin-responsive protein SAUR32-like [Phoenix dactylifera]	4.51375	5.93006	6.24665	0.936927	0.988751	1.33715	5.11534	2.35483	up
ko04075	Plant hormone signal transduction	0.000118027	MSTRG.33106	HHC049561	K14488	NA	PREDICTED: auxin-responsive protein SAUR36-like [Elaeis guineensis]	0.869756	0.677951	1.33102	0.228605	0.338899	0.212294	3.69162	1.88425	up
ko04075	Plant hormone signal transduction	0.000118027	MSTRG.33125	HHC052041	K14494	NA	uncharacterized protein A4U43_C10F210 [Asparagus officinalis]	10.7316	10.0006	3.89148	18.8735	18.6586	16.1367	0.458809	-1.12403	down
ko04075	Plant hormone signal transduction	0.000118027	MSTRG.33218	HHC049955	K14495	NA	F-box protein GID2-like isoform X1 [Phoenix dactylifera]	92.3434	89.5985	282.29	21.0839	23.8575	27.8373	6.37869	2.67326	up
ko04075	Plant hormone signal transduction	0.000118027	MSTRG.33328	HHC051732	K14491	NA	two-component response regulator ORR26-like [Asparagus officinalis]	44.4245	33.7708	36.0129	7.72778	5.56515	10.3484	4.83087	2.27228	up
ko04075	Plant hormone signal transduction	0.000118027	MSTRG.33498	HHC052932	K14488	NA	PREDICTED: auxin-responsive protein SAUR32-like [Elaeis guineensis]	161.88	136.922	153.796	43.1481	40.6419	41.1148	3.62353	1.8574	up
ko04075	Plant hormone signal transduction	0.000118027	MSTRG.33597	HHC054232	K14484	NA	auxin-induced protein 22D-like [Phoenix dactylifera]	0.139489	0.212725	0.0818969	1.59684	1.56229	1.05257	0.103073	-3.27827	down
ko04075	Plant hormone signal transduction	0.000118027	MSTRG.33740	HHC052953	K14488	NA	auxin-responsive protein SAUR32-like [Phoenix dactylifera]	25.3636	11.8683	46.9241	0.642528	0.0001	1.20147	45.6354	5.51208	up
ko04075	Plant hormone signal transduction	0.000118027	MSTRG.33777	HHC049446	K14514	NA	hypothetical protein BHE74_00000428 [Ensete ventricosum]	54.8059	54.779	60.6803	25.6485	30.2925	12.4149	2.49086	1.31665	up
ko04075	Plant hormone signal transduction	0.000118027	MSTRG.34030	HHC052577	K14488	NA	translin [Asparagus officinalis]	0.213808	0.309965	0.361627	0.966266	0.68283	0.827555	0.357499	-1.48399	down
ko04075	Plant hormone signal transduction	0.000118027	MSTRG.34049	HHC053575	K14497	EC:3.1.3.16	PREDICTED: probable protein phosphatase 2C 75 [Musa acuminata subsp. malaccensis]	9.38582	3.29489	45.2855	6.9374	3.96279	4.57838	3.74493	1.90494	up
ko04075	Plant hormone signal transduction	0.000118027	MSTRG.34244	HHC053713	K14432	NA	ABSCISIC ACID-INSENSITIVE 5-like protein 5 [Dendrobium catenatum]	95.6608	77.0882	234.693	47.8232	43.6844	44.362	2.99877	1.58437	up
ko04075	Plant hormone signal transduction	0.000118027	MSTRG.34438	HHC053634	K14431	NA	uncharacterized protein A4U43_C05F12980 [Asparagus officinalis]	10.7403	12.9129	33.4926	3.70859	3.84056	3.55354	5.14702	2.36374	up
ko04075	Plant hormone signal transduction	0.000118027	MSTRG.34532	HHC049810	K14485	NA	protein AUXIN SIGNALING F-BOX 3-like [Asparagus officinalis]	85.5359	29.7833	49.4245	215.149	126.177	223.437	0.291704	-1.77742	down
ko04075	Plant hormone signal transduction	0.000118027	MSTRG.35494	HHC051145	K14505	NA	cyclin-D3-2-like [Asparagus officinalis]	9.27485	6.95359	2.90501	31.4031	29.2096	28.0791	0.21573	-2.2127	down
ko04075	Plant hormone signal transduction	0.000118027	MSTRG.35658	HHC048333	K14486	NA	auxin response factor 12-like isoform X1 [Phoenix dactylifera]	40.385	11.6503	15.6287	91.5781	78.6439	95.1578	0.25497	-1.9716	down
ko04075	Plant hormone signal transduction	0.000118027	MSTRG.35884	HHC053141	K14494	NA	PREDICTED: protein SHORT-ROOT 1-like [Elaeis guineensis]	25.9526	18.0684	30.9302	13.6013	12.8087	10.6486	2.0225	1.01614	up
ko04075	Plant hormone signal transduction	0.000118027	MSTRG.35914	HHC049995	K13416	EC:2.7.10.1;EC:2.7.11.1	LRR receptor kinase BAK1-like [Asparagus officinalis]	267.33	115.248	382.606	39.6831	45.0427	39.5162	6.15882	2.62265	up
ko04075	Plant hormone signal transduction	0.000118027	MSTRG.35926	HHC050013	K14487	NA	PREDICTED: probable indole-3-acetic acid-amido synthetase GH3.8 [Elaeis guineensis]	1.34744	0.834361	2.01305	9.6859	8.64661	9.28761	0.151877	-2.71903	down
ko04075	Plant hormone signal transduction	0.000118027	MSTRG.3829	HHC005678	K14499	NA	probable membrane-associated kinase regulator 1 [Asparagus officinalis]	2.29533	1.04559	0.0001	29.0589	28.1802	24.0753	0.0410876	-4.60515	down
ko04075	Plant hormone signal transduction	0.000118027	MSTRG.4026	HHC005937	K13413	EC:2.7.12.2	Error-prone DNA polymerase [Gossypium arboreum]	10.7496	8.95339	5.92219	1.59083	2.04508	1.56367	4.92831	2.30109	up
ko04075	Plant hormone signal transduction	0.000118027	MSTRG.4158	HHC006094	K14497	EC:3.1.3.16	PREDICTED: probable protein phosphatase 2C 24 [Elaeis guineensis];probable protein phosphatase 2C 24 [Phoenix dactylifera]	760.866	536.448	1565.71	151.17	142.721	146.264	6.50459	2.70146	up
ko04075	Plant hormone signal transduction	0.000118027	MSTRG.4204	HHC006179	K13946	NA	auxin transporter-like protein 2 [Cicer arietinum]	17.9962	26.0257	42.6642	9.77773	10.9226	11.0921	2.72663	1.44712	up
ko04075	Plant hormone signal transduction	0.000118027	MSTRG.4398	HHC040774	K13413	EC:2.7.12.2	protein LIGHT-DEPENDENT SHORT HYPOCOTYLS 6-like [Coffea arabica]	5.89881	5.35702	2.31459	1.23837	0.85331	0.992086	4.4006	2.1377	up
ko04075	Plant hormone signal transduction	0.000118027	MSTRG.4612	HHC041189	K14431	NA	PREDICTED: U-box domain-containing protein 4 [Elaeis guineensis]	36.3602	41.7867	40.9799	20.5043	16.0475	16.8807	2.22948	1.15671	up
ko04075	Plant hormone signal transduction	0.000118027	MSTRG.529	HHC000575	K14484	NA	auxin-responsive protein IAA18-like [Asparagus officinalis]	30.1212	28.545	40.6123	10.2338	11.0058	9.81643	3.19676	1.67661	up
ko04075	Plant hormone signal transduction	0.000118027	MSTRG.5328	HHC042321	K14489	EC:2.7.13.3	histidine kinase 5 [Asparagus officinalis]	7.27004	4.62044	10.7159	19.7307	17.8747	18.499	0.402935	-1.31138	down
ko04075	Plant hormone signal transduction	0.000118027	MSTRG.5668	HHC042780	K14432	NA	PREDICTED: G-box-binding factor 4 [Elaeis guineensis];hypothetical protein B296_00029710 [Ensete ventricosum]	12.3055	10.5826	18.8022	5.84124	5.83321	5.49062	2.42879	1.28024	up
ko04075	Plant hormone signal transduction	0.000118027	MSTRG.5763	HHC042918	K13415	EC:2.7.10.1;EC:2.7.11.1	PREDICTED: probable LRR receptor-like serine/threonine-protein kinase At4g36180 [Elaeis guineensis]	54.0935	20.3685	2.953	306.939	304.171	294.402	0.085493	-3.54805	down
ko04075	Plant hormone signal transduction	0.000118027	MSTRG.5839	HHC043031	K14486	NA	auxin response factor 12-like isoform X1 [Phoenix dactylifera]	7.84205	2.5053	4.78514	17.0142	15.7781	12.8019	0.331895	-1.5912	down
ko04075	Plant hormone signal transduction	0.000118027	MSTRG.6018	HHC043285	K13413	EC:2.7.12.2	hypothetical protein DCAR_002318 [Daucus carota subsp. sativus]	0.701312	0.216892	0.0001	5.54502	6.25522	6.17606	0.0510841	-4.29098	down
ko04075	Plant hormone signal transduction	0.000118027	MSTRG.6184	HHC043515	K13415	EC:2.7.10.1;EC:2.7.11.1	phytosulfokine receptor 1-like [Asparagus officinalis]	88.0388	130.491	106.428	23.1115	25.7075	21.5684	4.61671	2.20687	up
ko04075	Plant hormone signal transduction	0.000118027	MSTRG.622	HHC000708	K14503	NA	protein BZR1 homolog 3 [Phoenix dactylifera]	25.2669	18.3918	30.0413	9.22539	9.05545	9.41092	2.66144	1.41221	up
ko04075	Plant hormone signal transduction	0.000118027	MSTRG.633	HHC000729	K14502	EC:2.7.11.1	shaggy-related protein kinase eta-like [Asparagus officinalis]	31.7404	14.1833	16.1222	49.0598	53.7742	46.9805	0.414152	-1.27177	down
ko04075	Plant hormone signal transduction	0.000118027	MSTRG.6353	HHC043727	K14488	NA	translin [Asparagus officinalis]	24.8375	17.169	9.30662	68.7241	63.791	67.6419	0.256365	-1.96373	down
ko04075	Plant hormone signal transduction	0.000118027	MSTRG.6360	HHC043741	K14516	NA	ethylene-responsive transcription factor 1B-like [Asparagus officinalis]	4.0845	3.29518	3.37107	0.717325	0.274176	0.389484	7.78484	2.96067	up
ko04075	Plant hormone signal transduction	0.000118027	MSTRG.6579	HHC044034	K14494	NA	PREDICTED: scarecrow-like protein 15 [Elaeis guineensis]	26.1062	20.3569	43.4996	9.07768	7.78165	7.7417	3.65687	1.87061	up
ko04075	Plant hormone signal transduction	0.000118027	MSTRG.6585	HHC044043	K14503	NA	protein BZR1 homolog 1 [Phoenix dactylifera]	60.6945	34.9253	25.2642	89.9203	91.3921	94.5095	0.438268	-1.19011	down
ko04075	Plant hormone signal transduction	0.000118027	MSTRG.6611	HHC044078	K14494	NA	PREDICTED: protein SHORT-ROOT 1-like [Elaeis guineensis]	24.6324	11.7657	16.2136	8.59416	9.24408	8.2909	2.01353	1.00972	up
ko04075	Plant hormone signal transduction	0.000118027	MSTRG.6625	HHC044103	K14494	NA	PREDICTED: scarecrow-like protein 32 [Elaeis guineensis]	0.731936	0.49275	0.448947	4.43798	5.09639	4.40982	0.120024	-3.05861	down
ko04075	Plant hormone signal transduction	0.000118027	MSTRG.6634	HHC044110	K13416	EC:2.7.10.1;EC:2.7.11.1	LRR receptor kinase BAK1-like [Asparagus officinalis]	50.8525	41.5378	57.3064	8.63426	5.87367	8.86447	6.40485	2.67917	up
ko04075	Plant hormone signal transduction	0.000118027	MSTRG.6642	HHC044125	K14487	NA	PREDICTED: probable indole-3-acetic acid-amido synthetase GH3.8 [Elaeis guineensis]	4.38522	4.29227	6.76901	44.9755	52.2154	47.4212	0.106813	-3.22684	down
ko04075	Plant hormone signal transduction	0.000118027	MSTRG.7164	HHC044770	K14494	NA	protein DWARF AND LOW-TILLERING-like [Asparagus officinalis]	9.91856	1.73276	0.159362	30.8024	49.2027	50.1096	0.0907714	-3.46162	down
ko04075	Plant hormone signal transduction	0.000118027	MSTRG.7231	HHC044822	K14516	NA	PREDICTED: ethylene-responsive transcription factor 1B-like [Eucalyptus grandis]	4.94046	6.69537	4.6546	2.04549	2.34067	1.77812	2.64271	1.40202	up
ko04075	Plant hormone signal transduction	0.000118027	MSTRG.7237	HHC044849	K14484	NA	auxin-responsive protein IAA10-like [Asparagus officinalis]	86.4106	80.4485	84.9682	24.3257	25.803	23.9355	3.40012	1.76559	up
ko04075	Plant hormone signal transduction	0.000118027	MSTRG.7410	HHC045086	K14498	EC:2.7.11.1	serine/threonine-protein kinase SAPK10 [Asparagus officinalis]	93.5338	78.758	140.134	42.6656	40.9617	44.2571	2.44303	1.28867	up
ko04075	Plant hormone signal transduction	0.000118027	MSTRG.7532	HHC045314	K14486	NA	auxin response factor 17 isoform X1 [Asparagus officinalis];auxin response factor 17-like isoform X1 [Asparagus officinalis]	29.9699	24.2051	17.8221	69.993	81.4555	79.4541	0.311807	-1.68127	down
ko04075	Plant hormone signal transduction	0.000118027	MSTRG.7533	HHC045315	K14486	NA	auxin response factor 17-like isoform X1 [Asparagus officinalis]	117.064	75.2405	69.464	227.445	180.192	206.311	0.42637	-1.22982	down
ko04075	Plant hormone signal transduction	0.000118027	MSTRG.7808	HHC045829	K13416	EC:2.7.10.1;EC:2.7.11.1	PREDICTED: receptor like protein kinase S.2 [Elaeis guineensis]	15.234	12.4432	10.5486	4.82315	4.20712	5.24311	2.67811	1.42122	up
ko04075	Plant hormone signal transduction	0.000118027	MSTRG.7939	HHC046114	K13415	EC:2.7.10.1;EC:2.7.11.1	hypothetical protein B296_00007867 [Ensete ventricosum]	37.7604	13.8174	36.0045	8.6225	9.25663	9.45253	3.20443	1.68007	up
ko04075	Plant hormone signal transduction	0.000118027	MSTRG.7987	HHC046253	K14491	NA	myb family transcription factor EFM-like [Asparagus officinalis]	21.1362	22.7522	19.4799	9.18713	8.06712	7.31365	2.57931	1.36699	up
ko04075	Plant hormone signal transduction	0.000118027	MSTRG.8236	HHC046672	K14515	NA	hypothetical protein BHE74_00046053, partial [Ensete ventricosum]	5.47852	17.375	4.42697	1.69036	1.35084	1.88206	5.54115	2.47019	up
ko04075	Plant hormone signal transduction	0.000118027	MSTRG.8684	HHC006211	K13946	NA	auxin transporter-like protein 4 [Asparagus officinalis]	91.6086	136.862	157.757	34.2734	30.1461	31.1224	4.0425	2.01525	up
ko04075	Plant hormone signal transduction	0.000118027	MSTRG.8729	HHC006272	K14497	EC:3.1.3.16	probable protein phosphatase 2C 24 [Phoenix dactylifera];hypothetical protein AQUCO_00900891v1 [Aquilegia coerulea]	1872.29	949.724	3372.29	182.875	179.7	165.373	11.7328	3.55248	up
ko04075	Plant hormone signal transduction	0.000118027	MSTRG.8996	HHC006612	K14494	NA	scarecrow-like protein 1-like transcript variant X1 [Cymbidium ensifolium]	14.4701	10.576	4.84569	66.6278	56.9167	57.0419	0.165526	-2.59487	down
ko04075	Plant hormone signal transduction	0.000118027	MSTRG.9175	HHC006849	K14485	NA	transport inhibitor response 1-like protein Os05g0150500 [Phoenix dactylifera]	49.202	41.1797	44.1091	108.157	108.575	110.57	0.410908	-1.28311	down
ko04075	Plant hormone signal transduction	0.000118027	MSTRG.9327	HHC007060	K14484	NA	auxin-induced protein 22D-like [Phoenix dactylifera]	3.11698	2.26589	1.20171	8.53107	8.66141	8.2291	0.259015	-1.94889	down
ko04075	Plant hormone signal transduction	0.000118027	MSTRG.9353	HHC007097	K14514	NA	protein ETHYLENE INSENSITIVE 3-like [Asparagus officinalis]	4.36657	4.22267	3.80174	1.96801	2.24252	1.08422	2.34024	1.22666	up
ko04075	Plant hormone signal transduction	0.000118027	MSTRG.9354	HHC007104	K14514	NA	protein ETHYLENE INSENSITIVE 3-like [Asparagus officinalis]	2.24385	1.93007	3.58471	1.02934	1.68325	0.776918	2.22341	1.15278	up
ko04075	Plant hormone signal transduction	0.000118027	MSTRG.9395	HHC007179	K14486	NA	auxin response factor 18-like isoform X1 [Asparagus officinalis]	14.0746	6.7903	9.15776	23.287	25.088	22.2677	0.424993	-1.23449	down
ko04141	Protein processing in endoplasmic reticulum	0.000294298	gene-HHC004054	HHC004054	K03094	NA	transcription factor NACa [Narcissus tazetta]	1.08128	0.131852	1.20924	0.11595	0.092082	0.186387	6.1416	2.61861	up
ko04141	Protein processing in endoplasmic reticulum	0.000294298	gene-HHC004065	HHC004065	K03283	NA	uncharacterized protein A4U43_C07F8000 [Asparagus officinalis]	0.51205	0.124864	0.0001	1.7124	1.61429	2.18835	0.115505	-3.11397	down
ko04141	Protein processing in endoplasmic reticulum	0.000294298	gene-HHC006036	HHC006036	K03283	NA	uncharacterized protein LOC103716510 [Phoenix dactylifera]	1.71635	1.86081	0.493725	4.86093	5.06827	4.36553	0.284782	-1.81207	down
ko04141	Protein processing in endoplasmic reticulum	0.000294298	gene-HHC006345	HHC006345	K03283	NA	heat shock cognate 70 kDa protein 2-like [Coffea arabica];heat shock cognate 70 kDa protein 2-like [Quercus suber]	3.79738	3.26477	0.754632	0.323272	0.361161	0.270705	8.18392	3.03279	up
ko04141	Protein processing in endoplasmic reticulum	0.000294298	gene-HHC008127	HHC008127	K03283	NA	uncharacterized protein A4U43_C07F8000 [Asparagus officinalis]	0.183286	0.0956628	0.0001	0.719284	0.800847	0.540646	0.135409	-2.8846	down
ko04141	Protein processing in endoplasmic reticulum	0.000294298	gene-HHC013283	HHC013283	K01228	EC:3.2.1.106	Exostosin-like [Macleaya cordata];probable arabinosyltransferase ARAD1 isoform X2 [Asparagus officinalis]	1.93413	1.49507	1.93022	5.6611	5.81244	5.85076	0.309358	-1.69265	down
ko04141	Protein processing in endoplasmic reticulum	0.000294298	gene-HHC019790	HHC019790	K14011	NA	hypothetical protein CK203_063061 [Vitis vinifera]	1.38921	1.34421	1.45349	0.242105	0.564239	0.0703906	4.77557	2.25567	up
ko04141	Protein processing in endoplasmic reticulum	0.000294298	gene-HHC024114	HHC024114	K13993	NA	chloroplast small heat shock protein [Agave americana]	0.670188	0.831166	0.771916	0.268463	0.331563	0.34472	2.40622	1.26677	up
ko04141	Protein processing in endoplasmic reticulum	0.000294298	gene-HHC028858	HHC028858	K16196	EC:2.7.11.1	eIF-2-alpha kinase GCN2 [Asparagus officinalis]	0.156079	1.00051	0.139627	2.05592	2.59845	2.54755	0.179983	-2.47407	down
ko04141	Protein processing in endoplasmic reticulum	0.000294298	gene-HHC029787	HHC029787	K04374	NA	PREDICTED: basic leucine zipper 61-like [Elaeis guineensis]	0.0001	0.0001	0.0001	4.17578	4.28011	4.27425	2.35661e-05	-15.3729	down
ko04141	Protein processing in endoplasmic reticulum	0.000294298	gene-HHC043708	HHC043708	K10950	EC:1.8.4.-	PREDICTED: endoplasmic reticulum oxidoreductin-1 [Musa acuminata subsp. malaccensis];uncharacterized protein A4U43_C07F25620 [Asparagus officinalis]	1.14506	1.19432	1.76519	2.64851	3.36072	3.07545	0.451813	-1.1462	down
ko04141	Protein processing in endoplasmic reticulum	0.000294298	gene-HHC046671	HHC046671	K13993	NA	26.5 kDa heat shock protein, mitochondrial [Ananas comosus]	0.834474	0.495404	0.333051	0.104624	0.0968739	0.220265	3.9428	1.97922	up
ko04141	Protein processing in endoplasmic reticulum	0.000294298	gene-HHC053538	HHC053538	K03094	NA	PREDICTED: NAC domain-containing protein 35 [Elaeis guineensis]	0.672056	0.137433	0.780419	0.168825	0.119667	0.209893	3.19012	1.67361	up
ko04141	Protein processing in endoplasmic reticulum	0.000294298	MSTRG.10196	HHC008742	K03283	NA	heat shock cognate 70 kDa protein 2-like [Asparagus officinalis];heat shock protein 70 [Chimonanthus praecox];heat shock cognate 70 kDa protein 2 [Asparagus officinalis];PREDICTED: heat shock cognate 70 kDa protein 2 [Oryza brachyantha]	318.159	306.564	155.919	831.586	827.558	812.969	0.315779	-1.66301	down
ko04141	Protein processing in endoplasmic reticulum	0.000294298	MSTRG.10201	HHC008752	K03283	NA	heat shock cognate 70 kDa protein 2-like [Phoenix dactylifera];probable mediator of RNA polymerase II transcription subunit 37c [Oryza sativa Japonica Group]	48.827	45.0048	174.59	7.48924	7.31941	6.119	12.8262	3.68102	up
ko04141	Protein processing in endoplasmic reticulum	0.000294298	MSTRG.10249	HHC008820	K08288	NA	PREDICTED: glucosidase 2 subunit beta [Musa acuminata subsp. malaccensis]	36.5035	32.5897	41.1867	132.076	136.426	126.579	0.279132	-1.84098	down
ko04141	Protein processing in endoplasmic reticulum	0.000294298	MSTRG.10613	HHC009402	K04079	NA	heat shock protein 81-1 isoform X2 [Asparagus officinalis]	75.1014	84.0869	103.103	170.088	182.465	194.445	0.479511	-1.06037	down
ko04141	Protein processing in endoplasmic reticulum	0.000294298	MSTRG.11100	HHC010130	K09561	EC:2.3.2.27	E3 ubiquitin-protein ligase CHIP [Asparagus officinalis]	50.7732	54.7347	91.3882	27.1606	25.2021	26.3419	2.50171	1.32291	up
ko04141	Protein processing in endoplasmic reticulum	0.000294298	MSTRG.11138	HHC010202	K04374	NA	uncharacterized protein A4U43_C02F6180 [Asparagus officinalis];uncharacterized protein At4g06598-like [Asparagus officinalis]	4.91769	2.66326	2.08171	13.3367	12.0998	12.1104	0.257349	-1.9582	down
ko04141	Protein processing in endoplasmic reticulum	0.000294298	MSTRG.11157	HHC010237	K09580	EC:5.3.4.1	protein disulfide-isomerase-like [Asparagus officinalis]	33.1778	35.1401	33.238	113.558	116.995	116.399	0.29271	-1.77246	down
ko04141	Protein processing in endoplasmic reticulum	0.000294298	MSTRG.11492	HHC010667	K14007	NA	protein transport protein Sec24-like At3g07100 [Asparagus officinalis];protein transport protein Sec24-like At3g07100 [Phoenix dactylifera]	35.2434	37.4863	45.8508	97.3782	101.558	98.7222	0.398378	-1.32779	down
ko04141	Protein processing in endoplasmic reticulum	0.000294298	MSTRG.11529	HHC010712	K09486	NA	heat shock 70 kDa protein 17 isoform X1 [Asparagus officinalis]	79.4173	54.1431	80.3221	340.555	362.3	353.639	0.202446	-2.30439	down
ko04141	Protein processing in endoplasmic reticulum	0.000294298	MSTRG.11773	HHC011066	K14007	NA	uncharacterized protein LOC109842810 isoform X2 [Asparagus officinalis]	5.37183	3.48144	8.19018	2.26929	2.25745	2.59632	2.39272	1.25865	up
ko04141	Protein processing in endoplasmic reticulum	0.000294298	MSTRG.11958	HHC011324	K13993	NA	17.3 kDa class II heat shock protein-like [Phoenix dactylifera]	52.9775	21.1646	28.0129	14.5099	17.5361	15.9888	2.12669	1.08861	up
ko04141	Protein processing in endoplasmic reticulum	0.000294298	MSTRG.12223	HHC011646	K04374	NA	PREDICTED: basic leucine zipper 61-like [Elaeis guineensis];basic leucine zipper 61-like protein [Cinnamomum micranthum f. kanehirae]	0.0001	0.598076	0.302367	13.767	14.536	16.36	0.0201631	-5.63214	down
ko04141	Protein processing in endoplasmic reticulum	0.000294298	MSTRG.12655	HHC012261	K10661	EC:2.3.2.27	uncharacterized protein LOC109832588 [Asparagus officinalis]	13.1331	17.1711	17.8698	6.94097	7.85918	7.74422	2.13685	1.09549	up
ko04141	Protein processing in endoplasmic reticulum	0.000294298	MSTRG.1324	HHC001674	K09580	EC:5.3.4.1	protein disulfide-isomerase-like [Asparagus officinalis]	26.91	25.2475	15.3154	117.949	114.217	120.673	0.191229	-2.38663	down
ko04141	Protein processing in endoplasmic reticulum	0.000294298	MSTRG.13665	HHC013926	K06689	EC:2.3.2.23	PREDICTED: ubiquitin-conjugating enzyme E2-17 kDa isoform X1 [Elaeis guineensis];PREDICTED: ubiquitin-conjugating enzyme E2-17 kDa isoform X2 [Elaeis guineensis]	734.396	552.635	1182.71	362.679	375.953	369.785	2.22817	1.15586	up
ko04141	Protein processing in endoplasmic reticulum	0.000294298	MSTRG.13759	HHC014050	K04374	NA	PREDICTED: basic leucine zipper 61-like [Elaeis guineensis]	0.101678	0.182698	0.0001	4.99081	5.10732	4.69876	0.0192254	-5.70084	down
ko04141	Protein processing in endoplasmic reticulum	0.000294298	MSTRG.13976	HHC014352	K12669	NA	hypothetical protein BHE74_00004029 [Ensete ventricosum]	79.6684	61.3974	42.7313	136.57	138.95	150.39	0.43154	-1.21244	down
ko04141	Protein processing in endoplasmic reticulum	0.000294298	MSTRG.14062	HHC014459	K08054	NA	PREDICTED: calnexin homolog [Elaeis guineensis];calnexin homolog [Phoenix dactylifera]	324.6	349.565	439.598	979.869	1088.36	1015.8	0.361139	-1.46937	down
ko04141	Protein processing in endoplasmic reticulum	0.000294298	MSTRG.14275	HHC014775	K03283	NA	heat shock cognate 70 kDa protein 2 isoform X2 [Populus trichocarpa]	270.682	241.32	196.82	859.372	803.61	837.588	0.283464	-1.81876	down
ko04141	Protein processing in endoplasmic reticulum	0.000294298	MSTRG.14535	HHC015099	K03094	NA	transcription factor NACa [Narcissus tazetta];NAC domain-containing protein 68 [Ananas comosus]	122.855	71.3916	169.831	15.0918	17.7517	15.0734	7.59811	2.92564	up
ko04141	Protein processing in endoplasmic reticulum	0.000294298	MSTRG.14588	HHC015166	K14005	NA	protein transport protein SEC31 homolog B-like [Phoenix dactylifera];uncharacterized protein A4U43_C05F4080 [Asparagus officinalis]	32.02	26.9818	29.3417	75.346	76.9091	76.5482	0.386111	-1.37291	down
ko04141	Protein processing in endoplasmic reticulum	0.000294298	MSTRG.14671	HHC015310	K08054	NA	LOW QUALITY PROTEIN: calnexin homolog [Carica papaya]	4.13272	2.98357	3.63865	9.52283	11.862	9.69472	0.346046	-1.53096	down
ko04141	Protein processing in endoplasmic reticulum	0.000294298	MSTRG.14747	HHC015427	K10839	NA	ubiquitin receptor RAD23b [Rosa chinensis];Putative DNA repair protein RAD23-1 [Apostasia shenzhenica]	4.8919	6.27273	5.30285	13.7855	17.4121	16.1492	0.347806	-1.52365	down
ko04141	Protein processing in endoplasmic reticulum	0.000294298	MSTRG.14927	HHC015651	K12275	NA	uncharacterized protein LOC109834479 [Asparagus officinalis]	1.82766	1.89633	2.09687	4.38667	3.83279	4.69836	0.450607	-1.15006	down
ko04141	Protein processing in endoplasmic reticulum	0.000294298	MSTRG.1528	HHC001951	K09555	NA	PREDICTED: BAG family molecular chaperone regulator 3-like [Elaeis guineensis]	109.053	42.8018	6.59391	10.8631	10.3564	9.78356	5.11075	2.35353	up
ko04141	Protein processing in endoplasmic reticulum	0.000294298	MSTRG.1539	HHC001965	K09555	NA	PREDICTED: BAG family molecular chaperone regulator 3-like [Elaeis guineensis]	7.47558	0.999253	0.471152	0.528343	0.186525	0.700451	6.32082	2.66011	up
ko04141	Protein processing in endoplasmic reticulum	0.000294298	MSTRG.15691	HHC016601	K09555	NA	BAG family molecular chaperone regulator 2-like [Dendrobium catenatum]	3.30643	1.46509	2.12325	4.17259	4.80822	6.46573	0.446364	-1.16371	down
ko04141	Protein processing in endoplasmic reticulum	0.000294298	MSTRG.16229	HHC017284	K09584	EC:5.3.4.1	protein disulfide isomerase-like 2-3 [Phoenix dactylifera]	69.3103	59.3616	51.3124	442.028	436.103	453.639	0.135147	-2.8874	down
ko04141	Protein processing in endoplasmic reticulum	0.000294298	MSTRG.16517	HHC017695	K10666	EC:2.3.2.27	RING finger protein 5 [Asparagus officinalis]	57.2271	51.4581	68.7539	25.9678	24.4602	26.0225	2.32097	1.21473	up
ko04141	Protein processing in endoplasmic reticulum	0.000294298	MSTRG.16760	HHC018027	K08057	NA	calreticulin-like [Asparagus officinalis]	4.32	2.45522	0.139833	17.7873	18.1528	17.1845	0.130167	-2.94157	down
ko04141	Protein processing in endoplasmic reticulum	0.000294298	MSTRG.16761	HHC018029	K08057	NA	calreticulin-like [Asparagus officinalis]	184.624	192.182	165.052	1487.8	1538.06	1504.1	0.119617	-3.06351	down
ko04141	Protein processing in endoplasmic reticulum	0.000294298	MSTRG.16767	HHC018036	K09517	NA	dnaJ protein ERDJ3B [Jatropha curcas];dnaJ protein ERDJ3B-like [Asparagus officinalis]	7.1783	5.35314	11.8689	17.2799	18.4586	15.4675	0.476514	-1.06941	down
ko04141	Protein processing in endoplasmic reticulum	0.000294298	MSTRG.16770	HHC018038	K09584	EC:5.3.4.1	protein disulfide isomerase-like 2-2 [Asparagus officinalis]	50.664	52.3133	50.6574	140.724	137.375	143.596	0.364327	-1.45669	down
ko04141	Protein processing in endoplasmic reticulum	0.000294298	MSTRG.17155	HHC018533	K10661	EC:2.3.2.27	probable E3 ubiquitin ligase SUD1 [Asparagus officinalis]	70.4896	85.7571	138.526	47.6724	49.1806	47.2589	2.04544	1.03241	up
ko04141	Protein processing in endoplasmic reticulum	0.000294298	MSTRG.17198	HHC018596	K10956	NA	hypothetical protein PAHAL_9G555800 [Panicum hallii]	94.4326	84.1558	94.7957	187.702	193.422	193.337	0.475897	-1.07128	down
ko04141	Protein processing in endoplasmic reticulum	0.000294298	MSTRG.17463	HHC019006	K09487	NA	heat shock protein 83-like protein [Ornithogalum longebracteatum]	18.4871	9.25381	23.7492	36.8953	35.7925	39.2289	0.460076	-1.12006	down
ko04141	Protein processing in endoplasmic reticulum	0.000294298	MSTRG.17520	HHC019095	K03283	NA	hypothetical protein AXF42_Ash003460 [Apostasia shenzhenica]	8.93203	5.57192	16.4462	2.46871	2.20926	2.61613	4.24318	2.08515	up
ko04141	Protein processing in endoplasmic reticulum	0.000294298	MSTRG.17571	HHC019152	K14007	NA	protein transport protein SEC23 [Asparagus officinalis]	19.0693	20.6093	23.6982	51.2643	60.2369	54.3576	0.382113	-1.38793	down
ko04141	Protein processing in endoplasmic reticulum	0.000294298	MSTRG.18396	HHC020580	K13250	NA	uncharacterized protein A4U43_C02F12000 [Asparagus officinalis];translocon-associated protein subunit beta-like [Asparagus officinalis]	131.267	98.0149	124.012	242.559	232.891	231.308	0.49988	-1.00035	down
ko04141	Protein processing in endoplasmic reticulum	0.000294298	MSTRG.18669	HHC020901	K03094	NA	PREDICTED: NAC domain-containing protein 35-like [Elaeis guineensis]	10.9838	7.2638	6.22498	2.2168	2.40046	2.50236	3.43735	1.7813	up
ko04141	Protein processing in endoplasmic reticulum	0.000294298	MSTRG.18739	HHC021017	K03094	NA	NAC domain-containing protein 7-like [Asparagus officinalis]	1.06839	6.13598	3.18411	1.56104	1.41813	1.69145	2.22422	1.1533	up
ko04141	Protein processing in endoplasmic reticulum	0.000294298	MSTRG.18833	HHC021136	K09555	NA	BAG family molecular chaperone regulator 1 [Dendrobium officinale]	26.8003	13.4932	10.6512	51.4668	48.5714	51.7031	0.335734	-1.57461	down
ko04141	Protein processing in endoplasmic reticulum	0.000294298	MSTRG.19108	HHC021506	K08057	NA	calreticulin-3-like [Asparagus officinalis]	110.222	91.2512	110.779	237.406	235.032	236.429	0.440495	-1.1828	down
ko04141	Protein processing in endoplasmic reticulum	0.000294298	MSTRG.19288	HHC021752	K08057	NA	calreticulin-like [Asparagus officinalis]	538.589	454.053	590.521	3325.22	3384.17	3359.41	0.157234	-2.66901	down
ko04141	Protein processing in endoplasmic reticulum	0.000294298	MSTRG.19330	HHC021813	K09584	EC:5.3.4.1	protein disulfide isomerase-like 2-3 [Phoenix dactylifera]	10.1508	6.80041	9.34348	31.9375	30.5019	30.8055	0.281996	-1.82625	down
ko04141	Protein processing in endoplasmic reticulum	0.000294298	MSTRG.19836	HHC022519	K08057	NA	calreticulin-like [Asparagus officinalis]	0.727133	0.18763	0.0001	4.17322	3.5911	3.94727	0.078116	-3.67824	down
ko04141	Protein processing in endoplasmic reticulum	0.000294298	MSTRG.19839	HHC022526	K09517	NA	dnaJ protein ERDJ3B-like [Asparagus officinalis]	194.282	127.228	211.62	536.953	584.754	550.516	0.318815	-1.64921	down
ko04141	Protein processing in endoplasmic reticulum	0.000294298	MSTRG.19840	HHC022527	K09584	EC:5.3.4.1	protein disulfide isomerase-like 2-2 [Asparagus officinalis]	55.7086	42.8961	42.9879	133.584	110.723	117.676	0.391158	-1.35418	down
ko04141	Protein processing in endoplasmic reticulum	0.000294298	MSTRG.1990	HHC002618	K04079	NA	heat shock protein 81-1 isoform X2 [Asparagus officinalis]	241.432	45.7188	306.013	708.62	714.453	149.969	0.377081	-1.40706	down
ko04141	Protein processing in endoplasmic reticulum	0.000294298	MSTRG.20168	HHC022968	K10661	EC:2.3.2.27	probable E3 ubiquitin ligase SUD1 [Asparagus officinalis]	351.2	290.194	493.293	156.45	159.998	158.815	2.38749	1.2555	up
ko04141	Protein processing in endoplasmic reticulum	0.000294298	MSTRG.20441	HHC023323	K13993	NA	16.0 kDa heat shock protein, peroxisomal [Asparagus officinalis]	40.2256	32.1279	60.6872	18.2217	13.849	17.9101	2.66183	1.41242	up
ko04141	Protein processing in endoplasmic reticulum	0.000294298	MSTRG.21017	HHC024267	K14009	NA	B-cell receptor-associated protein 31-like [Asparagus officinalis]	23.5026	17.7618	17.4639	39.4562	42.6732	41.1056	0.476555	-1.06928	down
ko04141	Protein processing in endoplasmic reticulum	0.000294298	MSTRG.21081	HHC024385	K03868	EC:2.3.2.32	PREDICTED: GEM-like protein 7 [Elaeis guineensis]	33.7941	9.87168	21.8541	8.06856	6.75612	8.65119	2.79095	1.48076	up
ko04141	Protein processing in endoplasmic reticulum	0.000294298	MSTRG.21266	HHC024745	K03094	NA	PREDICTED: NAC domain-containing protein 35-like [Elaeis guineensis]	10.634	38.5076	5.08177	0.586039	1.62217	1.56735	14.3617	3.84415	up
ko04141	Protein processing in endoplasmic reticulum	0.000294298	MSTRG.21344	HHC024878	K13250	NA	translocon-associated protein subunit beta-like [Asparagus officinalis]	109.599	86.3698	145.731	230.739	237.784	232.67	0.487313	-1.03708	down
ko04141	Protein processing in endoplasmic reticulum	0.000294298	MSTRG.21441	HHC025011	K14007	NA	protein transport protein Sec24-like At4g32640 [Asparagus officinalis]	30.9126	19.5178	24.0359	66.4962	69.7043	67.742	0.365134	-1.4535	down
ko04141	Protein processing in endoplasmic reticulum	0.000294298	MSTRG.21453	HHC025027	K14007	NA	protein transport protein Sec24-like At4g32640 [Asparagus officinalis]	69.3281	68.0327	79.3632	203.6	218.493	207.996	0.343958	-1.5397	down
ko04141	Protein processing in endoplasmic reticulum	0.000294298	MSTRG.21636	HHC025254	K04554	EC:2.3.2.23	ubiquitin-conjugating enzyme E2 34-like isoform X2 [Asparagus officinalis]	25.2264	18.3816	11.8487	3.69886	7.37858	7.6046	2.96845	1.56971	up
ko04141	Protein processing in endoplasmic reticulum	0.000294298	MSTRG.22420	HHC026611	K12666	NA	dolichyl-diphosphooligosaccharide--protein glycosyltransferase subunit 1B [Asparagus officinalis]	206.317	215.004	180.717	570.966	588.87	591.468	0.343766	-1.5405	down
ko04141	Protein processing in endoplasmic reticulum	0.000294298	MSTRG.22597	HHC026936	K09487	NA	uncharacterized protein A4U43_C07F29530 [Asparagus officinalis]	83.6383	91.8899	73.8786	228.478	235.034	237.384	0.35584	-1.4907	down
ko04141	Protein processing in endoplasmic reticulum	0.000294298	MSTRG.23255	HHC027915	K12667	NA	dolichyl-diphosphooligosaccharide--protein glycosyltransferase subunit 2-like [Asparagus officinalis]	185.085	145.733	151.985	523.3	527.666	533.773	0.304658	-1.71474	down
ko04141	Protein processing in endoplasmic reticulum	0.000294298	MSTRG.23295	HHC027971	K08054	NA	Calreticulin/calnexin [Macleaya cordata]	39.1067	34.056	34.0398	79.5839	90.1434	86.8115	0.41788	-1.25884	down
ko04141	Protein processing in endoplasmic reticulum	0.000294298	MSTRG.23549	HHC028308	K10661	EC:2.3.2.27	uncharacterized protein LOC109829105 [Asparagus officinalis]	5.78028	1.88429	21.9707	2.62551	1.04631	1.82201	5.39427	2.43143	up
ko04141	Protein processing in endoplasmic reticulum	0.000294298	MSTRG.23657	HHC028470	K13993	NA	chaperone [Agave tequilana]	125.467	67.7956	104.22	54.5043	41.7495	41.7547	2.15554	1.10805	up
ko04141	Protein processing in endoplasmic reticulum	0.000294298	MSTRG.23658	HHC028458	K13993	NA	hypothetical protein GW17_00036431 [Ensete ventricosum]	8.3538	3.93623	12.7553	1.04198	0.461196	0.561246	12.1318	3.60073	up
ko04141	Protein processing in endoplasmic reticulum	0.000294298	MSTRG.23664	HHC028464	K13993	NA	chaperone [Agave tequilana]	4.53329	0.744429	4.50492	1.43341	1.29819	1.03581	2.59665	1.37665	up
ko04141	Protein processing in endoplasmic reticulum	0.000294298	MSTRG.23739	HHC028555	K09580	EC:5.3.4.1	protein disulfide isomerase-like 1-5 [Asparagus officinalis]	21.8338	17.3346	15.1454	85.5899	88.417	84.3022	0.210267	-2.24971	down
ko04141	Protein processing in endoplasmic reticulum	0.000294298	MSTRG.23873	HHC028730	K04374	NA	PREDICTED: basic leucine zipper 61-like [Elaeis guineensis]	3.33489	2.85621	0.0001	31.5245	36.7474	36.4744	0.0591066	-4.08054	down
ko04141	Protein processing in endoplasmic reticulum	0.000294298	MSTRG.23918	HHC028782	K06689	EC:2.3.2.23	hypothetical protein PRUPE_2G306300 [Prunus persica]	1395.13	1100.95	1754.74	472.172	479.114	462.98	3.00567	1.58769	up
ko04141	Protein processing in endoplasmic reticulum	0.000294298	MSTRG.23937	HHC028816	K13993	NA	chaperone [Agave tequilana]	6.65798	13.3307	3.12963	1.09702	1.63796	1.69063	5.22375	2.38509	up
ko04141	Protein processing in endoplasmic reticulum	0.000294298	MSTRG.23938	HHC028817	K13993	NA	chaperone [Agave tequilana]	1.69045	0.635937	1.0894	0.199287	0.273875	0.25224	4.70882	2.23537	up
ko04141	Protein processing in endoplasmic reticulum	0.000294298	MSTRG.2401	HHC003226	K08288	NA	glucosidase 2 subunit beta [Asparagus officinalis]	29.5288	25.1322	27.3916	70.6743	74.5882	69.6751	0.38175	-1.3893	down
ko04141	Protein processing in endoplasmic reticulum	0.000294298	MSTRG.2440	HHC003283	K11863	EC:3.4.22.-	ataxin-3 homolog [Asparagus officinalis]	7.26057	7.47645	6.26332	18.3087	20.8536	18.668	0.363137	-1.46141	down
ko04141	Protein processing in endoplasmic reticulum	0.000294298	MSTRG.24430	HHC029481	K08054	NA	calnexin homolog [Asparagus officinalis]	154.301	171.98	196.325	647.872	647.954	654.107	0.268012	-1.89963	down
ko04141	Protein processing in endoplasmic reticulum	0.000294298	MSTRG.24508	HHC029581	K01228	EC:3.2.1.106	mannosyl-oligosaccharide glucosidase GCS1-like [Asparagus officinalis]	56.3929	41.7581	76.0626	134.678	114.152	128.166	0.462109	-1.1137	down
ko04141	Protein processing in endoplasmic reticulum	0.000294298	MSTRG.24758	HHC029923	K06689	EC:2.3.2.23	ubiquitin-conjugating enzyme E2 11-like [Phoenix dactylifera]	381.551	375.458	544.159	174.369	170.152	170.059	2.52861	1.33834	up
ko04141	Protein processing in endoplasmic reticulum	0.000294298	MSTRG.25013	HHC030282	K12670	NA	dolichyl-diphosphooligosaccharide--protein glycosyltransferase 48 kDa subunit-like isoform X3 [Asparagus officinalis]	14.2215	10.0223	12.1994	53.3968	53.3024	54.5268	0.226038	-2.14536	down
ko04141	Protein processing in endoplasmic reticulum	0.000294298	MSTRG.25094	HHC030406	K13989	NA	derlin-2.2-like [Asparagus officinalis]	62.9512	58.4488	93.6005	29.7398	33.7398	32.9842	2.22882	1.15628	up
ko04141	Protein processing in endoplasmic reticulum	0.000294298	MSTRG.25144	HHC030480	K01228	EC:3.2.1.106	probable arabinosyltransferase ARAD1 isoform X2 [Asparagus officinalis]	3.07212	1.53669	2.56735	6.47501	7.11507	5.77191	0.370631	-1.43194	down
ko04141	Protein processing in endoplasmic reticulum	0.000294298	MSTRG.25326	HHC030780	K04554	EC:2.3.2.23	ubiquitin-conjugating enzyme E2 34-like isoform X2 [Asparagus officinalis]	95.889	39.7039	83.5347	29.6982	23.08	31.0179	2.61501	1.38682	up
ko04141	Protein processing in endoplasmic reticulum	0.000294298	MSTRG.25654	HHC031349	K10597	EC:2.3.2.27	LOW QUALITY PROTEIN: probable ubiquitin conjugation factor E4 [Asparagus officinalis]	88.9526	132.411	79.5907	220.404	220.582	216.058	0.458044	-1.12644	down
ko04141	Protein processing in endoplasmic reticulum	0.000294298	MSTRG.25849	HHC031745	K06689	EC:2.3.2.23	ubiquitin-conjugating enzyme E2-17 kDa-like [Asparagus officinalis]	5.14331	0.378682	1.99345	0.86087	0.60585	0.465628	3.88928	1.9595	up
ko04141	Protein processing in endoplasmic reticulum	0.000294298	MSTRG.25928	HHC031883	K06689	EC:2.3.2.23	hypothetical protein B456_007G014500 [Gossypium raimondii]	1115.68	859.892	1199.58	479.829	491.334	494.81	2.1659	1.11497	up
ko04141	Protein processing in endoplasmic reticulum	0.000294298	MSTRG.26029	HHC032036	K07151	EC:2.4.99.18	dolichyl-diphosphooligosaccharide--protein glycosyltransferase subunit STT3A [Asparagus officinalis]	11.2892	10.8634	10.8596	41.752	38.4268	41.4627	0.271389	-1.88156	down
ko04141	Protein processing in endoplasmic reticulum	0.000294298	MSTRG.26560	HHC032893	K12670	NA	dolichyl-diphosphooligosaccharide--protein glycosyltransferase 48 kDa subunit-like isoform X3 [Asparagus officinalis]	45.3097	46.1548	40.5226	135.399	139.867	138.971	0.318627	-1.65006	down
ko04141	Protein processing in endoplasmic reticulum	0.000294298	MSTRG.27103	HHC033823	K10084	NA	alpha-mannosidase I MNS5 isoform X1 [Asparagus officinalis]	19.6069	19.5989	29.8428	57.4368	48.0622	51.3076	0.440343	-1.1833	down
ko04141	Protein processing in endoplasmic reticulum	0.000294298	MSTRG.27468	HHC034434	K10956	NA	COBRA-like protein 7 [Asparagus officinalis]	317.758	246.843	313.277	131.727	136.671	134.666	2.17801	1.12301	up
ko04141	Protein processing in endoplasmic reticulum	0.000294298	MSTRG.27791	HHC034923	K10839	NA	LOW QUALITY PROTEIN: ubiquitin receptor RAD23b-like [Asparagus officinalis]	26.7882	17.5551	24.4453	47.2974	50.4557	48.2953	0.470999	-1.08621	down
ko04141	Protein processing in endoplasmic reticulum	0.000294298	MSTRG.27929	HHC035131	K14006	NA	PREDICTED: protein transport protein SEC23-like [Musa acuminata subsp. malaccensis]	28.9803	39.022	31.5399	129.366	121.474	125.107	0.264778	-1.91715	down
ko04141	Protein processing in endoplasmic reticulum	0.000294298	MSTRG.28005	HHC035253	K03283	NA	Stromal 70 kDa heat shock-related protein, chloroplastic [Ananas comosus]	57.1014	53.9934	55.8286	132.627	129.791	126.314	0.429405	-1.21959	down
ko04141	Protein processing in endoplasmic reticulum	0.000294298	MSTRG.28339	HHC035680	K07151	EC:2.4.99.18	PREDICTED: dolichyl-diphosphooligosaccharide--protein glycosyltransferase subunit STT3B isoform X1 [Elaeis guineensis]	91.7317	81.217	90.7825	240.702	251.561	241.05	0.359644	-1.47536	down
ko04141	Protein processing in endoplasmic reticulum	0.000294298	MSTRG.28369	HHC035732	K09490	NA	PREDICTED: luminal-binding protein 2 [Musa acuminata subsp. malaccensis]	182.098	149.898	280.252	751.515	748.838	759.423	0.270933	-1.88399	down
ko04141	Protein processing in endoplasmic reticulum	0.000294298	MSTRG.28571	HHC036009	K09490	NA	PREDICTED: luminal-binding protein 2 [Musa acuminata subsp. malaccensis]	26.2096	19.5025	28.657	117.234	129.171	124.419	0.200551	-2.31796	down
ko04141	Protein processing in endoplasmic reticulum	0.000294298	MSTRG.28696	HHC036179	K06689;K04392	EC:2.3.2.23	ubiquitin-conjugating enzyme E2-17 kDa-like [Asparagus officinalis];PREDICTED: rac-like GTP-binding protein 5 [Malus domestica]	1553.45	941.211	724.408	250.184	280.181	288.135	3.93288	1.97559	up
ko04141	Protein processing in endoplasmic reticulum	0.000294298	MSTRG.2879	HHC004013	K04079	NA	heat shock protein 81-1 isoform X2 [Asparagus officinalis]	214.223	154.352	214.104	928.878	850.062	915.431	0.216258	-2.20918	down
ko04141	Protein processing in endoplasmic reticulum	0.000294298	MSTRG.2902	HHC004055	K03094	NA	NAC transcription factor 29-like [Asparagus officinalis]	11.2047	15.1756	86.081	6.95279	8.12494	7.19619	5.04901	2.336	up
ko04141	Protein processing in endoplasmic reticulum	0.000294298	MSTRG.29289	HHC036954	K14005	NA	protein transport protein SEC31 homolog B-like [Phoenix dactylifera]	90.6668	41.9729	100.423	175.618	191.983	185.765	0.421173	-1.24751	down
ko04141	Protein processing in endoplasmic reticulum	0.000294298	MSTRG.29517	HHC037328	K03283	NA	heat shock cognate protein 2 [Cinnamomum micranthum f. kanehirae]	76.9687	87.7937	83.0077	289.517	276.292	253.122	0.302553	-1.72474	down
ko04141	Protein processing in endoplasmic reticulum	0.000294298	MSTRG.29796	HHC037790	K13993	NA	22.3 kDa class VI heat shock protein isoform X1 [Asparagus officinalis]	51.0574	36.4288	73.1253	7.47813	9.90769	8.84406	6.12322	2.61429	up
ko04141	Protein processing in endoplasmic reticulum	0.000294298	MSTRG.29867	HHC037899	K12670	NA	dolichyl-diphosphooligosaccharide--protein glycosyltransferase 48 kDa subunit-like isoform X3 [Asparagus officinalis]	63.3608	58.1263	55.1862	220.302	213.101	222.128	0.269511	-1.89158	down
ko04141	Protein processing in endoplasmic reticulum	0.000294298	MSTRG.3029	HHC004261	K12668	NA	dolichyl-diphosphooligosaccharide--protein glycosyltransferase subunit DAD1 [Asparagus officinalis]	123.014	85.5026	89.1663	197.324	200.682	209.531	0.489982	-1.0292	down
ko04141	Protein processing in endoplasmic reticulum	0.000294298	MSTRG.30419	HHC038779	K07151	EC:2.4.99.18	dolichyl-diphosphooligosaccharide--protein glycosyltransferase subunit STT3A [Asparagus officinalis]	163.161	114.764	156.397	566.678	547.009	539.836	0.262665	-1.92871	down
ko04141	Protein processing in endoplasmic reticulum	0.000294298	MSTRG.3060	HHC004312	K10661	EC:2.3.2.27	uncharacterized protein LOC109846990 [Asparagus officinalis]	15.9782	11.5523	91.9024	2.0813	2.14283	3.06274	16.3902	4.03476	up
ko04141	Protein processing in endoplasmic reticulum	0.000294298	MSTRG.30780	HHC039301	K13993	NA	Alpha crystallin/Hsp20 domain [Macleaya cordata]	11.955	2.26297	9.17579	0.592915	0.0001	0.372613	24.2265	4.59851	up
ko04141	Protein processing in endoplasmic reticulum	0.000294298	MSTRG.30889	HHC039434	K10666	EC:2.3.2.27	PREDICTED: uncharacterized protein LOC105053788 [Elaeis guineensis]	543.565	310.807	522.944	172.224	160.814	159.166	2.79827	1.48453	up
ko04141	Protein processing in endoplasmic reticulum	0.000294298	MSTRG.3101	HHC004397	K04079	NA	PREDICTED: uncharacterized protein LOC103995568 isoform X3 [Musa acuminata subsp. malaccensis]	0.954895	0.110262	7.18918	0.0001	0.0001	0.0695939	118.267	6.88591	up
ko04141	Protein processing in endoplasmic reticulum	0.000294298	MSTRG.31764	HHC040506	K14007	NA	protein transport protein Sec24-like At4g32640 [Asparagus officinalis]	11.5875	12.9606	13.3754	29.4602	29.855	24.2522	0.453806	-1.13985	down
ko04141	Protein processing in endoplasmic reticulum	0.000294298	MSTRG.31846	HHC049740	K13993	NA	17.8 kDa class I heat shock protein [Jatropha curcas]	14.1807	38.0988	8.60813	6.82104	5.1853	6.38605	3.31048	1.72704	up
ko04141	Protein processing in endoplasmic reticulum	0.000294298	MSTRG.31967	HHC049019	K04079	NA	heat shock protein 81-1 isoform X2 [Asparagus officinalis]	187.389	161.662	212.741	543.343	534.513	537.098	0.347869	-1.52338	down
ko04141	Protein processing in endoplasmic reticulum	0.000294298	MSTRG.32068	HHC051576	K04374	NA	uncharacterized protein At4g06598-like [Asparagus officinalis]	1.24281	0.475365	0.515851	3.87541	3.92301	2.82768	0.210239	-2.2499	down
ko04141	Protein processing in endoplasmic reticulum	0.000294298	MSTRG.32099	HHC049304	K09561	EC:2.3.2.27	E3 ubiquitin-protein ligase CHIP [Asparagus officinalis]	48.2655	39.384	70.0477	22.0435	22.0316	22.8589	2.35601	1.23635	up
ko04141	Protein processing in endoplasmic reticulum	0.000294298	MSTRG.32130	HHC048762	K09580	EC:5.3.4.1	protein disulfide-isomerase-like [Asparagus officinalis]	43.5394	37.9015	40.9666	81.7387	88.7297	89.1284	0.47153	-1.08458	down
ko04141	Protein processing in endoplasmic reticulum	0.000294298	MSTRG.32373	HHC053264	K04374	NA	PREDICTED: basic leucine zipper 61-like [Elaeis guineensis]	0.564972	0.247483	0.0001	12.9352	15.7012	12.0468	0.0199728	-5.64582	down
ko04141	Protein processing in endoplasmic reticulum	0.000294298	MSTRG.32412	HHC052697	K09562	NA	PREDICTED: hsp70-binding protein 1 isoform X1 [Elaeis guineensis]	25.7199	20.9915	22.8534	50.3054	50.071	53.5389	0.451968	-1.14571	down
ko04141	Protein processing in endoplasmic reticulum	0.000294298	MSTRG.32488	HHC053092	K03283	NA	uncharacterized protein A4U43_C07F8000 [Asparagus officinalis]	3.64235	0.450856	0.0001	18.7334	20.0445	18.1181	0.0719436	-3.79699	down
ko04141	Protein processing in endoplasmic reticulum	0.000294298	MSTRG.32783	HHC048717	K03283	NA	heat shock cognate 70 kDa protein 2 isoform X2 [Populus trichocarpa]	61.9711	52.0619	30.9396	137.801	144.884	137.896	0.344696	-1.5366	down
ko04141	Protein processing in endoplasmic reticulum	0.000294298	MSTRG.33003	HHC047392	K12275	NA	uncharacterized protein LOC109822575 [Asparagus officinalis]	7.24166	7.8749	8.3323	22.4931	18.4796	20.5952	0.380861	-1.39266	down
ko04141	Protein processing in endoplasmic reticulum	0.000294298	MSTRG.33039	HHC053327	K03094	NA	NAC domain-containing protein 86-like [Asparagus officinalis]	12.2924	28.1315	20.0602	3.71446	3.97597	4.77007	4.85406	2.27919	up
ko04141	Protein processing in endoplasmic reticulum	0.000294298	MSTRG.3303	HHC004814	K13249	NA	translocon-associated protein subunit alpha-like [Asparagus officinalis]	355.452	298.744	288.935	702.18	521.818	696.198	0.491164	-1.02572	down
ko04141	Protein processing in endoplasmic reticulum	0.000294298	MSTRG.33285	HHC048666	K03283	NA	uncharacterized protein LOC109836816 [Asparagus officinalis]	4.71746	1.74426	2.88625	0.709854	1.54556	0.873483	2.98762	1.579	up
ko04141	Protein processing in endoplasmic reticulum	0.000294298	MSTRG.33527	HHC047851	K08057	NA	calreticulin-like [Asparagus officinalis]	83.4096	60.8525	89.139	341.479	357.518	331.607	0.22647	-2.14261	down
ko04141	Protein processing in endoplasmic reticulum	0.000294298	MSTRG.33565	HHC051353	K09584	EC:5.3.4.1	protein disulfide isomerase-like 2-3 [Phoenix dactylifera]	64.9855	36.0364	39.3148	173.208	183.065	160.842	0.271384	-1.88159	down
ko04141	Protein processing in endoplasmic reticulum	0.000294298	MSTRG.34009	HHC050255	K14004	NA	protein transport protein SEC13 homolog B-like [Phoenix dactylifera]	39.2553	47.1582	41.6968	87.066	95.3173	92.5412	0.465984	-1.10165	down
ko04141	Protein processing in endoplasmic reticulum	0.000294298	MSTRG.34133	HHC051451	K04374	NA	PREDICTED: basic leucine zipper 61-like [Elaeis guineensis]	0.0001	0.160178	0.0001	14.7734	12.0705	14.8813	0.00384368	-8.0233	down
ko04141	Protein processing in endoplasmic reticulum	0.000294298	MSTRG.34229	HHC049269	K08054	NA	calnexin homolog [Asparagus officinalis]	88.7412	77.3777	101.416	252.494	242.315	245.732	0.361269	-1.46885	down
ko04141	Protein processing in endoplasmic reticulum	0.000294298	MSTRG.34265	HHC052116	K13250	NA	translocon-associated protein subunit beta-like [Asparagus officinalis]	23.8666	30.0924	34.6318	72.2928	80.5792	73.8543	0.390739	-1.35572	down
ko04141	Protein processing in endoplasmic reticulum	0.000294298	MSTRG.34413	HHC050721	K07151	EC:2.4.99.18	dolichyl-diphosphooligosaccharide--protein glycosyltransferase subunit STT3A [Asparagus officinalis]	36.0812	31.4817	38.0616	94.5228	99.6007	97.474	0.362227	-1.46503	down
ko04141	Protein processing in endoplasmic reticulum	0.000294298	MSTRG.3475	HHC005136	K09580	EC:5.3.4.1	protein disulfide isomerase-like 1-4 [Asparagus officinalis]	219.956	173.062	125.794	1271.4	1317.69	1259.43	0.134808	-2.89103	down
ko04141	Protein processing in endoplasmic reticulum	0.000294298	MSTRG.34808	HHC050495	K14007	NA	protein transport protein Sec24-like At4g32640 [Asparagus officinalis]	13.904	13.5376	11.4653	38.3331	45.1308	46.5346	0.299287	-1.7404	down
ko04141	Protein processing in endoplasmic reticulum	0.000294298	MSTRG.35351	HHC050446	K09580	EC:5.3.4.1	protein disulfide-isomerase-like [Asparagus officinalis]	2.37395	1.67241	2.77113	6.47854	5.37349	5.41242	0.394886	-1.34049	down
ko04141	Protein processing in endoplasmic reticulum	0.000294298	MSTRG.35604	HHC052276	K09490	NA	PREDICTED: luminal-binding protein 2-like [Musa acuminata subsp. malaccensis]	32.6951	20.84	46.4124	98.6562	106.711	96.9077	0.330651	-1.59662	down
ko04141	Protein processing in endoplasmic reticulum	0.000294298	MSTRG.35628	HHC049088	K07151	EC:2.4.99.18	dolichyl-diphosphooligosaccharide--protein glycosyltransferase subunit STT3B [Glycine max]	57.1297	61.8106	49.9267	326.459	311.496	317.281	0.17678	-2.49997	down
ko04141	Protein processing in endoplasmic reticulum	0.000294298	MSTRG.35811	HHC051064	K03237	NA	PREDICTED: eukaryotic translation initiation factor 2 subunit alpha homolog [Nelumbo nucifera]	23.327	20.7725	13.3918	39.9269	37.9738	38.9671	0.491934	-1.02346	down
ko04141	Protein processing in endoplasmic reticulum	0.000294298	MSTRG.3900	HHC005778	K14006	NA	PREDICTED: protein transport protein SEC23 [Elaeis guineensis]	17.8836	18.2945	14.5879	33.9983	35.2289	34.4425	0.48969	-1.03006	down
ko04141	Protein processing in endoplasmic reticulum	0.000294298	MSTRG.4114	HHC006046	K03283	NA	heat shock cognate 70 kDa protein 2-like [Quercus suber];heat shock cognate 70 kDa protein 2-like [Coffea arabica]	48.5938	27.5472	32.2882	10.1086	9.81895	9.76652	3.65154	1.8685	up
ko04141	Protein processing in endoplasmic reticulum	0.000294298	MSTRG.4494	HHC040932	K01228	EC:3.2.1.106	probable arabinosyltransferase ARAD1 [Asparagus officinalis]	25.7711	17.2558	25.5249	49.5195	43.057	48.0599	0.48744	-1.0367	down
ko04141	Protein processing in endoplasmic reticulum	0.000294298	MSTRG.4530	HHC041013	K14006	NA	PREDICTED: protein transport protein sec23-1 isoform X1 [Elaeis guineensis]	8.33559	7.27954	11.1175	3.99873	3.89607	4.11828	2.22529	1.154	up
ko04141	Protein processing in endoplasmic reticulum	0.000294298	MSTRG.5164	HHC042099	K10956	NA	protein transport protein Sec61 subunit alpha-like [Asparagus officinalis]	9.38326	8.15548	1.251	47.484	43.5767	44.6803	0.138424	-2.85284	down
ko04141	Protein processing in endoplasmic reticulum	0.000294298	MSTRG.5255	HHC042214	K04523	NA	uncharacterized protein LOC109845540 isoform X1 [Asparagus officinalis]	25.1387	30.2369	46.4179	16.698	17.9145	16.1023	2.00718	1.00517	up
ko04141	Protein processing in endoplasmic reticulum	0.000294298	MSTRG.5315	HHC042297	K10839	NA	LOW QUALITY PROTEIN: ubiquitin receptor RAD23b-like [Asparagus officinalis]	92.6816	55.8677	78.3385	160.357	156.855	144.798	0.491089	-1.02594	down
ko04141	Protein processing in endoplasmic reticulum	0.000294298	MSTRG.5445	HHC042499	K14006	NA	PREDICTED: protein transport protein SEC23-like [Musa acuminata subsp. malaccensis];PREDICTED: protein transport protein SEC23 isoform X1 [Elaeis guineensis]	7.50835	7.90527	7.48684	19.6035	19.823	18.0714	0.398283	-1.32813	down
ko04141	Protein processing in endoplasmic reticulum	0.000294298	MSTRG.5597	HHC042684	K14007	NA	protein transport protein SEC23 [Asparagus officinalis]	6.42752	5.27576	4.96343	13.7444	14.3203	12.4984	0.410883	-1.2832	down
ko04141	Protein processing in endoplasmic reticulum	0.000294298	MSTRG.5730	HHC042875	K06689	EC:2.3.2.23	histidine kinase 1 isoform X2 [Asparagus officinalis]	18.7789	13.9265	57.2896	3.13654	3.49538	2.83594	9.50532	3.24873	up
ko04141	Protein processing in endoplasmic reticulum	0.000294298	MSTRG.5863	HHC043066	K07151	EC:2.4.99.18	Dolichyl-diphosphooligosaccharide--protein glycosyltransferase subunit STT3B isoform A [Glycine soja]	33.6251	25.4328	28.7975	85.3419	83.1024	83.9154	0.348136	-1.52228	down
ko04141	Protein processing in endoplasmic reticulum	0.000294298	MSTRG.5890	HHC043114	K09490	NA	PREDICTED: luminal-binding protein 2-like [Musa acuminata subsp. malaccensis];PREDICTED: luminal-binding protein 2 [Musa acuminata subsp. malaccensis]	185.449	191.63	208.026	742.326	767.412	740.541	0.260014	-1.94334	down
ko04141	Protein processing in endoplasmic reticulum	0.000294298	MSTRG.6098	HHC043391	K09490	NA	PREDICTED: luminal-binding protein 2 [Musa acuminata subsp. malaccensis]	0.275593	0.152106	0.0842458	1.94044	1.03817	2.16606	0.0995098	-3.32902	down
ko04141	Protein processing in endoplasmic reticulum	0.000294298	MSTRG.6099	HHC043392	K09490	NA	PREDICTED: luminal-binding protein 4 [Elaeis guineensis]	27.627	20.3532	32.8317	93.9997	88.1872	82.0306	0.305854	-1.70909	down
ko04141	Protein processing in endoplasmic reticulum	0.000294298	MSTRG.6100	HHC043394	K10666	EC:2.3.2.27	PREDICTED: E3 ubiquitin-protein ligase RMA1H1-like [Elaeis guineensis];E3 ubiquitin-protein ligase RMA3-like [Asparagus officinalis]	55.0485	86.7785	130.204	34.9447	41.2753	37.4795	2.39254	1.25854	up
ko04141	Protein processing in endoplasmic reticulum	0.000294298	MSTRG.6209	HHC043543	K12666	NA	dolichyl-diphosphooligosaccharide--protein glycosyltransferase subunit 1A [Asparagus officinalis]	99.3693	91.0735	83.7452	269.691	269.984	269.786	0.338729	-1.5618	down
ko04141	Protein processing in endoplasmic reticulum	0.000294298	MSTRG.6275	HHC043622	K06689	EC:2.3.2.23	ubiquitin-conjugating enzyme E2-17 kDa-like [Asparagus officinalis]	100.616	36.4099	46.1261	4.32447	4.13428	3.66132	15.1114	3.91757	up
ko04141	Protein processing in endoplasmic reticulum	0.000294298	MSTRG.6325	HHC043685	K14004	NA	protein transport protein SEC13 homolog B-like [Phoenix dactylifera]	16.7373	17.4516	11.9065	37.8747	36.9193	37.9854	0.408722	-1.29081	down
ko04141	Protein processing in endoplasmic reticulum	0.000294298	MSTRG.6531	HHC043972	K05546	EC:3.2.1.207	probable glucan 1,3-alpha-glucosidase [Dendrobium catenatum];uncharacterized protein A4U43_C08F10040 [Asparagus officinalis];PREDICTED: probable glucan 1,3-alpha-glucosidase [Gossypium raimondii]	83.7467	84.1586	93.4591	202.747	205.316	208.311	0.424035	-1.23774	down
ko04141	Protein processing in endoplasmic reticulum	0.000294298	MSTRG.7137	HHC044730	K13989	NA	derlin-1 [Asparagus officinalis]	12.5951	10.9835	14.1097	26.7096	24.4206	26.9932	0.482421	-1.05164	down
ko04141	Protein processing in endoplasmic reticulum	0.000294298	MSTRG.7189	HHC044784	K03283	NA	uncharacterized protein LOC109820659 [Asparagus officinalis]	61.8115	30.2199	28.0735	127.78	136.76	142.417	0.29513	-1.76058	down
ko04141	Protein processing in endoplasmic reticulum	0.000294298	MSTRG.7375	HHC045047	K14018	NA	PREDICTED: phospholipase A-2-activating protein isoform X1 [Elaeis guineensis]	64.0273	49.2128	57.1333	162.785	168.093	168.77	0.340987	-1.55221	down
ko04141	Protein processing in endoplasmic reticulum	0.000294298	MSTRG.7450	HHC045164	K09487	NA	Heat shock protein Hsp90 family [Macleaya cordata];PREDICTED: heat shock protein 90-6, mitochondrial [Elaeis guineensis]	15.7009	24.2264	21.3974	51.3747	53.6856	69.2231	0.351868	-1.50689	down
ko04141	Protein processing in endoplasmic reticulum	0.000294298	MSTRG.7571	HHC045362	K14007	NA	protein transport protein Sec24-like At4g32640 [Asparagus officinalis]	12.2639	13.3061	11.0876	32.0154	33.6323	34.7637	0.365074	-1.45374	down
ko04141	Protein processing in endoplasmic reticulum	0.000294298	MSTRG.7884	HHC045996	K07953	EC:3.6.5.-	transcription factor bHLH63-like [Asparagus officinalis]	31.1439	21.398	9.59851	2.07393	2.6533	2.91777	8.12824	3.02294	up
ko04141	Protein processing in endoplasmic reticulum	0.000294298	MSTRG.7897	HHC046021	K03868	EC:2.3.2.32	RING-box protein 1a [Phoenix dactylifera]	246.692	219.394	341.929	114.327	116.047	114.592	2.34231	1.22793	up
ko04141	Protein processing in endoplasmic reticulum	0.000294298	MSTRG.8060	HHC046374	K06689	EC:2.3.2.23	hypothetical protein B296_00002551, partial [Ensete ventricosum]	8.75572	5.1517	10.9744	1.98781	1.47274	1.48829	5.02781	2.32993	up
ko04141	Protein processing in endoplasmic reticulum	0.000294298	MSTRG.8247	HHC046688	K04374	NA	PREDICTED: basic leucine zipper 61-like [Elaeis guineensis]	4.85543	3.49056	0.364796	37.1229	39.1162	36.1701	0.0774917	-3.68981	down
ko04141	Protein processing in endoplasmic reticulum	0.000294298	MSTRG.8296	HHC046768	K06689	EC:2.3.2.23	hypothetical protein B456_007G014500 [Gossypium raimondii];hypothetical protein PRUPE_2G306300 [Prunus persica]	3481.41	2086.56	3659.73	1072.73	1048.81	1029.95	2.92805	1.54994	up
ko04141	Protein processing in endoplasmic reticulum	0.000294298	MSTRG.8329	HHC046815	K13993	NA	chaperone [Agave tequilana]	0.355524	5.27753	0.150871	0.441036	0.263218	0.249823	6.06232	2.59987	up
ko04141	Protein processing in endoplasmic reticulum	0.000294298	MSTRG.8330	HHC046816	K13993	NA	chaperone [Agave tequilana]	100.994	117.988	47.2613	186.714	199.896	179.163	0.470584	-1.08748	down
ko04141	Protein processing in endoplasmic reticulum	0.000294298	MSTRG.8612	HHC047245	K09580	EC:5.3.4.1	protein disulfide-isomerase-like [Asparagus officinalis];protein disulfide-isomerase-like [Phoenix dactylifera]	21.1156	21.5071	31.3495	86.25	81.7671	76.1126	0.303003	-1.72259	down
ko04141	Protein processing in endoplasmic reticulum	0.000294298	MSTRG.86	HHC000116	K04374	NA	basic leucine zipper 61-like protein [Cinnamomum micranthum f. kanehirae]	0.0001	2.21085	0.0001	74.6033	66.7278	69.8268	0.0104711	-6.57745	down
ko04141	Protein processing in endoplasmic reticulum	0.000294298	MSTRG.8780	HHC006353	K03283	NA	heat shock cognate 70 kDa protein 2-like [Phoenix dactylifera]	2.39808	3.28117	6.89427	1.94281	2.12587	2.01301	2.06744	1.04784	up
ko04141	Protein processing in endoplasmic reticulum	0.000294298	MSTRG.9054	HHC006692	K07953	EC:3.6.5.-	PREDICTED: GTP-binding protein SAR1A [Cucumis sativus]	69.2521	59.0519	66.6726	134.003	140.622	137.389	0.473229	-1.07939	down
ko04141	Protein processing in endoplasmic reticulum	0.000294298	MSTRG.9432	HHC007256	K11718	EC:2.4.1.-	LOW QUALITY PROTEIN: UDP-glucose:glycoprotein glucosyltransferase [Asparagus officinalis]	236.553	200.179	289.047	539.2	539.735	510.19	0.456716	-1.13063	down
ko04141	Protein processing in endoplasmic reticulum	0.000294298	MSTRG.9552	HHC007482	K09487	NA	heat shock protein 90 [Ornithogalum longebracteatum];uncharacterized protein A4U43_C04F8030 [Asparagus officinalis]	156.765	169.449	184.793	705.974	652.666	621.372	0.258082	-1.9541	down
ko04141	Protein processing in endoplasmic reticulum	0.000294298	MSTRG.9790	HHC007995	K12668	NA	dolichyl-diphosphooligosaccharide--protein glycosyltransferase subunit DAD1 [Asparagus officinalis]	11.4542	6.74614	8.36847	18.3048	18.6195	18.6819	0.477803	-1.06551	down
ko04141	Protein processing in endoplasmic reticulum	0.000294298	MSTRG.989	HHC001205	K09486	NA	heat shock 70 kDa protein 17 isoform X1 [Asparagus officinalis];heat shock 70 kDa protein 17 [Phoenix dactylifera]	15.0657	13.6416	14.5814	75.6773	80.3826	79.4268	0.183826	-2.44358	down
ko04141	Protein processing in endoplasmic reticulum	0.000294298	MSTRG.9921	HHC008269	K09523	NA	dnaJ protein P58IPK homolog A [Asparagus officinalis]	10.8054	8.33855	13.089	32.9074	27.8777	29.9157	0.355377	-1.49258	down
ko00100	Steroid biosynthesis	0.000466313	gene-HHC006271	HHC006271	K14424	NA	methylsterol monooxygenase 2-2-like [Asparagus officinalis]	0.737243	0.635254	0.0001	5.38407	4.52919	4.61319	0.0944895	-3.4037	down
ko00100	Steroid biosynthesis	0.000466313	gene-HHC015225	HHC015225	K14674	EC:3.1.1.3;EC:3.1.1.13	PREDICTED: triacylglycerol lipase SDP1 isoform X1 [Musa acuminata subsp. malaccensis]	12.3519	14.3255	18.427	6.9518	6.4737	5.44972	2.38961	1.25678	up
ko00100	Steroid biosynthesis	0.000466313	gene-HHC022720	HHC022720	K14674	EC:3.1.1.3;EC:3.1.1.13	triacylglycerol lipase SDP1 [Asparagus officinalis]	17.5812	15.1395	5.68445	36.9269	39.3308	38.2334	0.335442	-1.57587	down
ko00100	Steroid biosynthesis	0.000466313	gene-HHC043058	HHC043058	K09828	EC:1.3.1.72;EC:1.3.1.-	uncharacterized protein A4U43_C07F24100 [Asparagus officinalis];delta(24)-sterol reductase-like isoform X1 [Asparagus officinalis]	4.3679	7.98895	6.00782	3.25602	2.56235	2.91062	2.10387	1.07305	up
ko00100	Steroid biosynthesis	0.000466313	gene-HHC045023	HHC045023	K00511	EC:1.14.14.17	squalene monooxygenase-like [Asparagus officinalis]	0.829833	1.46245	0.541683	2.57617	3.92706	3.18267	0.292587	-1.77306	down
ko00100	Steroid biosynthesis	0.000466313	gene-HHC046217	HHC046217	K07748	EC:1.1.1.170	PREDICTED: 3beta-hydroxysteroid-dehydrogenase/decarboxylase [Elaeis guineensis]	0.191435	0.166143	0.0001	2.55516	2.40632	2.57578	0.0474546	-4.39731	down
ko00100	Steroid biosynthesis	0.000466313	gene-HHC049201	HHC049201	K14674	EC:3.1.1.3;EC:3.1.1.13	LOW QUALITY PROTEIN: triacylglycerol lipase SDP1-like [Asparagus officinalis]	2.75988	2.18774	3.84571	1.19833	1.08738	1.14088	2.56621	1.35964	up
ko00100	Steroid biosynthesis	0.000466313	gene-HHC054295	HHC054295	K14674	EC:3.1.1.3;EC:3.1.1.13	LOW QUALITY PROTEIN: triacylglycerol lipase SDP1-like [Asparagus officinalis]	0.679355	0.627855	0.532447	0.0738016	0.148025	0.171624	4.67571	2.22518	up
ko00100	Steroid biosynthesis	0.000466313	MSTRG.13331	HHC013468	K00559	EC:2.1.1.41	PREDICTED: cycloartenol-C-24-methyltransferase 1 [Musa acuminata subsp. malaccensis]	49.727	23.0424	16.9476	207.746	216.752	224.319	0.138278	-2.85436	down
ko00100	Steroid biosynthesis	0.000466313	MSTRG.13396	HHC013552	K00801	EC:2.5.1.21	squalene synthase [Ornithogalum longebracteatum];squalene synthase-like [Asparagus officinalis]	22.0145	16.2992	10.3987	85.5714	85.2844	82.7884	0.19205	-2.38045	down
ko00100	Steroid biosynthesis	0.000466313	MSTRG.14059	HHC014456	K01824	EC:5.3.3.5	LOW QUALITY PROTEIN: probable 3-beta-hydroxysteroid-Delta(8),Delta(7)-isomerase [Asparagus officinalis]	2.92207	2.28691	2.95645	9.77312	10.7247	10.3673	0.264552	-1.91838	down
ko00100	Steroid biosynthesis	0.000466313	MSTRG.14616	HHC015217	K14674	EC:3.1.1.3;EC:3.1.1.13	LOW QUALITY PROTEIN: triacylglycerol lipase SDP1-like [Asparagus officinalis]	1.56181	1.26924	1.55679	0.28678	0.370537	0.436874	4.01012	2.00365	up
ko00100	Steroid biosynthesis	0.000466313	MSTRG.16927	HHC018251	K14674	EC:3.1.1.3;EC:3.1.1.13	triacylglycerol lipase SDP1 [Asparagus officinalis]	152.272	79.4418	150.621	60.5491	63.6825	66.7121	2.00235	1.00169	up
ko00100	Steroid biosynthesis	0.000466313	MSTRG.17397	HHC018903	K01853	EC:5.4.99.8	cycloartenol synthase [Asparagus racemosus];cycloartenol synthase 2-like [Asparagus officinalis]	24.9836	19.2391	12.1218	172.492	159.435	162.673	0.11392	-3.13391	down
ko00100	Steroid biosynthesis	0.000466313	MSTRG.17902	HHC019737	K07748	EC:1.1.1.170	PREDICTED: 3beta-hydroxysteroid-dehydrogenase/decarboxylase isoform X2 [Elaeis guineensis];LOW QUALITY PROTEIN: 3beta-hydroxysteroid-dehydrogenase/decarboxylase-like [Asparagus officinalis];uncharacterized protein A4U43_C04F19100 [Asparagus officinalis]	3.41714	3.38844	3.12821	7.25977	7.02582	6.07797	0.487822	-1.03557	down
ko00100	Steroid biosynthesis	0.000466313	MSTRG.19481	HHC022007	K05917	EC:1.14.13.70	uncharacterized protein A4U43_UnF2400 [Asparagus officinalis]	1.026	0.640496	0.0001	6.70743	8.14302	6.38431	0.0784842	-3.67145	down
ko00100	Steroid biosynthesis	0.000466313	MSTRG.20195	HHC022989	K01052	EC:3.1.1.13	triacylglycerol lipase 1 isoform X1 [Ananas comosus]	25.5079	29.4923	39.8808	9.71722	9.96579	10.3113	3.1633	1.66143	up
ko00100	Steroid biosynthesis	0.000466313	MSTRG.21321	HHC024837	K05917	EC:1.14.13.70	uncharacterized protein A4U43_UnF2400 [Asparagus officinalis]	4.47066	4.42567	0.0001	49.8506	51.4991	50.325	0.0586547	-4.09161	down
ko00100	Steroid biosynthesis	0.000466313	MSTRG.23656	HHC028473	K00227	EC:1.14.19.20	uncharacterized protein A4U43_C06F11750 [Asparagus officinalis]	2.92198	2.12863	1.36788	9.70664	8.3698	10.0597	0.228123	-2.13212	down
ko00100	Steroid biosynthesis	0.000466313	MSTRG.24034	HHC028949	K00222	EC:1.3.1.70	delta(14)-sterol reductase-like [Asparagus officinalis]	6.01046	3.19308	3.17271	17.0826	14.6114	17.9199	0.249451	-2.00317	down
ko00100	Steroid biosynthesis	0.000466313	MSTRG.24431	HHC029482	K01824	EC:5.3.3.5	LOW QUALITY PROTEIN: probable 3-beta-hydroxysteroid-Delta(8),Delta(7)-isomerase [Asparagus officinalis]	0.812821	0.276649	1.58265	3.61099	2.78554	3.22624	0.277687	-1.84847	down
ko00100	Steroid biosynthesis	0.000466313	MSTRG.25072	HHC030374	K00559	EC:2.1.1.41	PREDICTED: cycloartenol-C-24-methyltransferase 1 [Musa acuminata subsp. malaccensis]	7.91373	5.03061	4.52796	28.7412	30.1749	29.1036	0.198504	-2.33276	down
ko00100	Steroid biosynthesis	0.000466313	MSTRG.25374	HHC030877	K14423	NA	PREDICTED: methylsterol monooxygenase 1-1-like [Elaeis guineensis]	50.5687	30.7456	25.4307	155.176	147.223	152.85	0.234476	-2.09249	down
ko00100	Steroid biosynthesis	0.000466313	MSTRG.25662	HHC031367	K00511	EC:1.14.14.17	squalene monooxygenase-like [Asparagus officinalis]	8.96666	4.24714	5.41908	25.9496	26.5815	26.0507	0.237115	-2.07634	down
ko00100	Steroid biosynthesis	0.000466313	MSTRG.28617	HHC036073	K09828	EC:1.3.1.72;EC:1.3.1.-	uncharacterized protein A4U43_C07F24100 [Asparagus officinalis]	252.014	145.029	64.4795	607.612	615.459	501.601	0.2676	-1.90185	down
ko00100	Steroid biosynthesis	0.000466313	MSTRG.32556	HHC051230	K14424	NA	methylsterol monooxygenase 2-2-like [Asparagus officinalis]	1.31346	0.0001	0.699083	13.1585	11.5841	10.9132	0.0564465	-4.14697	down
ko00100	Steroid biosynthesis	0.000466313	MSTRG.33260	HHC051358	K01853	EC:5.4.99.8	cycloartenol synthase [Asparagus racemosus]	29.1096	24.1998	15.956	188.453	213.066	195.545	0.11601	-3.10768	down
ko00100	Steroid biosynthesis	0.000466313	MSTRG.33622	HHC048036	K05917	EC:1.14.13.70	uncharacterized protein A4U43_UnF2400 [Asparagus officinalis]	0.456521	0.0983218	0.0001	11.7265	10.4728	12.4326	0.016024	-5.96362	down
ko00100	Steroid biosynthesis	0.000466313	MSTRG.33971	HHC048097	K09828	EC:1.3.1.72;EC:1.3.1.-	uncharacterized protein A4U43_C07F24100 [Asparagus officinalis]	5.66573	93.8539	124.385	806.516	819.557	993.967	0.0854584	-3.54863	down
ko00100	Steroid biosynthesis	0.000466313	MSTRG.34230	HHC049270	K01824	EC:5.3.3.5	LOW QUALITY PROTEIN: probable 3-beta-hydroxysteroid-Delta(8),Delta(7)-isomerase [Asparagus officinalis]	35.9242	21.547	36.1999	125.267	113.104	115.398	0.26478	-1.91713	down
ko00100	Steroid biosynthesis	0.000466313	MSTRG.35332	HHC051277	K08246	EC:5.5.1.9	PREDICTED: cycloeucalenol cycloisomerase-like isoform X1 [Elaeis guineensis]	8.93345	8.22546	9.16956	19.618	17.5553	17.2822	0.483486	-1.04845	down
ko00100	Steroid biosynthesis	0.000466313	MSTRG.35634	HHC049100	K09828	EC:1.3.1.72;EC:1.3.1.-	uncharacterized protein A4U43_C07F24100 [Asparagus officinalis]	9.50829	8.75992	6.80009	2.43695	3.07588	2.52484	3.11885	1.64102	up
ko00100	Steroid biosynthesis	0.000466313	MSTRG.36091	HHC047497	K00222	EC:1.3.1.70	delta(14)-sterol reductase-like [Asparagus officinalis]	12.0205	10.2764	5.52563	60.7938	57.2916	55.1157	0.160637	-2.63812	down
ko00100	Steroid biosynthesis	0.000466313	MSTRG.4159	HHC006095	K14424	NA	methylsterol monooxygenase 2-2-like [Asparagus officinalis]	1.46229	1.52047	0.252838	8.77054	6.47542	8.16673	0.138199	-2.85518	down
ko00100	Steroid biosynthesis	0.000466313	MSTRG.4512	HHC040970	K14424	NA	methylsterol monooxygenase 2-2-like [Asparagus officinalis]	13.3563	11.2172	9.74402	30.4461	32.7412	30.3847	0.36675	-1.44713	down
ko00100	Steroid biosynthesis	0.000466313	MSTRG.6165	HHC043477	K09828	EC:1.3.1.72;EC:1.3.1.-	uncharacterized protein A4U43_C07F24100 [Asparagus officinalis]	129.716	79.5714	90.7625	476.885	477.022	471.358	0.210522	-2.24796	down
ko00100	Steroid biosynthesis	0.000466313	MSTRG.7908	HHC046040	K05917	EC:1.14.13.70	PREDICTED: obtusifoliol 14-alpha demethylase [Musa acuminata subsp. malaccensis]	0.443877	0.489695	0.0001	6.42539	3.2613	1.14126	0.086228	-3.5357	down
ko00100	Steroid biosynthesis	0.000466313	MSTRG.7914	HHC046044	K05917	EC:1.14.13.70	uncharacterized protein A4U43_UnF2400 [Asparagus officinalis]	23.4153	19.0925	16.8947	72.6037	94.3605	81.0033	0.239558	-2.06156	down
ko00100	Steroid biosynthesis	0.000466313	MSTRG.8017	HHC046302	K00227	EC:1.14.19.20	uncharacterized protein A4U43_C06F11750 [Asparagus officinalis]	8.90912	3.92152	2.18782	22.3163	22.0043	19.7007	0.234585	-2.09182	down
ko00100	Steroid biosynthesis	0.000466313	MSTRG.801	HHC000956	K07748	EC:1.1.1.170	uncharacterized protein A4U43_C01F31010 [Asparagus officinalis]	18.9695	14.1615	19.9385	51.4187	48.9667	50.4805	0.351766	-1.50731	down
ko00100	Steroid biosynthesis	0.000466313	MSTRG.8596	HHC047220	K08246	EC:5.5.1.9	cycloeucalenol cycloisomerase [Asparagus officinalis]	33.9199	24.3172	32.8052	81.9352	82.1668	88.927	0.35981	-1.47469	down
ko00100	Steroid biosynthesis	0.000466313	MSTRG.99	HHC000129	K09832	EC:1.14.19.41	uncharacterized protein A4U43_C01F25230 [Asparagus officinalis]	3.09781	3.30294	2.79695	11.4705	10.4173	11.5261	0.275266	-1.8611	down
ko00940	Phenylpropanoid biosynthesis	0.000825618	gene-HHC001078	HHC001078	K09753	EC:1.2.1.44	tetraketide alpha-pyrone reductase 2-like [Dendrobium catenatum]	2.5037	2.73485	1.37119	0.470554	0.420862	0.159372	6.29027	2.65312	up
ko00940	Phenylpropanoid biosynthesis	0.000825618	gene-HHC005443	HHC005443	K00430	EC:1.11.1.7	uncharacterized protein LOC114178961 [Vigna unguiculata]	1.16408	0.0677767	0.185944	2.22403	1.32778	1.70998	0.269451	-1.8919	down
ko00940	Phenylpropanoid biosynthesis	0.000825618	gene-HHC006107	HHC006107	K01188	EC:3.2.1.21	uncharacterized protein At3g49720-like [Asparagus officinalis]	1.3922	1.3897	0.0001	6.10149	4.61658	5.05154	0.176415	-2.50295	down
ko00940	Phenylpropanoid biosynthesis	0.000825618	gene-HHC007047	HHC007047	K01188	EC:3.2.1.21	polygalacturonase inhibitor-like [Asparagus officinalis]	0.201646	0.868617	0.0001	2.88023	4.10849	4.44955	0.0935775	-3.4177	down
ko00940	Phenylpropanoid biosynthesis	0.000825618	gene-HHC016497	HHC016497	K00430	EC:1.11.1.7	PREDICTED: vacuolar iron transporter homolog 2-like [Elaeis guineensis]	0.40328	0.496178	0.585381	0.0225553	0.074854	0.112402	7.07704	2.82315	up
ko00940	Phenylpropanoid biosynthesis	0.000825618	gene-HHC027551	HHC027551	K00430	EC:1.11.1.7	Peroxidase 15 [Ananas comosus]	4.56544	0.23432	0.0001	7.99914	9.88728	10.0412	0.171868	-2.54063	down
ko00940	Phenylpropanoid biosynthesis	0.000825618	gene-HHC035913	HHC035913	K10775	EC:4.3.1.24	phenylalanine ammonia lyase 62 [Ornithogalum longebracteatum]	5.30631	2.94155	3.5045	1.59736	1.66607	2.57603	2.01258	1.00904	up
ko00940	Phenylpropanoid biosynthesis	0.000825618	gene-HHC035915	HHC035915	K10775	EC:4.3.1.24	phenylalanine ammonia lyase 62 [Ornithogalum longebracteatum]	3.88857	2.43885	2.72838	1.07358	1.01554	0.391641	3.65042	1.86806	up
ko00940	Phenylpropanoid biosynthesis	0.000825618	gene-HHC036127	HHC036127	K00430	EC:1.11.1.7	peroxidase 64 [Asparagus officinalis]	2.44733	0.514795	0.233445	6.05144	4.65641	5.41359	0.198219	-2.33483	down
ko00940	Phenylpropanoid biosynthesis	0.000825618	gene-HHC037036	HHC037036	K10775	EC:4.3.1.24	phenylalanine ammonia-lyase [Manihot esculenta]	6.39559	2.00978	10.1158	1.71752	2.07483	0.633945	4.18435	2.065	up
ko00940	Phenylpropanoid biosynthesis	0.000825618	gene-HHC037187	HHC037187	K00083	EC:1.1.1.195	uncharacterized protein A4U43_C05F32250 [Asparagus officinalis]	0.630695	1.37309	0.249131	0.319605	0.292574	0.218243	2.71297	1.43987	up
ko00940	Phenylpropanoid biosynthesis	0.000825618	gene-HHC040048	HHC040048	K13066	EC:2.1.1.68	PREDICTED: (R,S)-reticuline 7-O-methyltransferase-like [Elaeis guineensis]	0.138627	0.201545	0.0001	0.844689	0.808394	1.03293	0.126683	-2.98071	down
ko00940	Phenylpropanoid biosynthesis	0.000825618	gene-HHC040715	HHC040715	K09753	EC:1.2.1.44	cinnamoyl-CoA reductase 1-like [Asparagus officinalis]	5.29808	5.58238	3.74511	0.0977734	0.855516	0.111873	13.7308	3.77935	up
ko00940	Phenylpropanoid biosynthesis	0.000825618	gene-HHC041639	HHC041639	K00430	EC:1.11.1.7	PREDICTED: peroxidase 5-like [Elaeis guineensis]	4.08693	1.51922	3.93929	0.756657	1.47416	1.18561	2.79399	1.48233	up
ko00940	Phenylpropanoid biosynthesis	0.000825618	MSTRG.10057	HHC008542	K00430	EC:1.11.1.7	peroxidase 4-like [Asparagus officinalis]	3.61839	1.05411	0.798298	0.573755	0.617191	0.49296	3.24887	1.69994	up
ko00940	Phenylpropanoid biosynthesis	0.000825618	MSTRG.10059	HHC008544	K00430	EC:1.11.1.7	Plant peroxidase [Macleaya cordata]	18.1152	4.45984	4.42591	4.34789	3.8169	3.55529	2.30382	1.20403	up
ko00940	Phenylpropanoid biosynthesis	0.000825618	MSTRG.10137	HHC008659	K01188	EC:3.2.1.21	uncharacterized protein At3g49720-like [Asparagus officinalis]	28.4654	11.7375	21.135	44.2945	53.9678	57.2704	0.394373	-1.34237	down
ko00940	Phenylpropanoid biosynthesis	0.000825618	MSTRG.10852	HHC009769	K01904	EC:6.2.1.12	4-coumarate:coenzyme A ligase [Ornithogalum longebracteatum]	35.8021	34.4488	51.5922	17.0372	17.3606	14.722	2.48053	1.31065	up
ko00940	Phenylpropanoid biosynthesis	0.000825618	MSTRG.10866	HHC009800	K13065	EC:2.3.1.133	hydroxycinnamoyltransferase [Narcissus pseudonarcissus]	550.235	408.771	896.295	233.557	247.815	228.436	2.61381	1.38615	up
ko00940	Phenylpropanoid biosynthesis	0.000825618	MSTRG.12339	HHC011789	K06892	EC:1.14.11.-	LOW QUALITY PROTEIN: IQ domain-containing protein IQM3-like [Asparagus officinalis]	32.7593	20.3576	16.7205	60.5731	62.4724	61.2917	0.378857	-1.40027	down
ko00940	Phenylpropanoid biosynthesis	0.000825618	MSTRG.12455	HHC011954	K00430	EC:1.11.1.7	peroxidase 12 [Phoenix dactylifera]	5.93267	8.67153	3.36479	1.42937	0.728921	0.583787	6.55306	2.71217	up
ko00940	Phenylpropanoid biosynthesis	0.000825618	MSTRG.13145	HHC013197	K13065	EC:2.3.1.133	putrescine hydroxycinnamoyltransferase 1-like [Phoenix dactylifera]	7.81461	1.33269	0.0001	15.6447	16.8584	16.1483	0.18802	-2.41105	down
ko00940	Phenylpropanoid biosynthesis	0.000825618	MSTRG.13147	HHC013198	K13065	EC:2.3.1.133	PREDICTED: putrescine hydroxycinnamoyltransferase 1-like [Elaeis guineensis]	0.666692	0.285053	0.0001	2.22352	1.74111	1.84303	0.163895	-2.60916	down
ko00940	Phenylpropanoid biosynthesis	0.000825618	MSTRG.13152	HHC013204	K13065	EC:2.3.1.133	putrescine hydroxycinnamoyltransferase 1-like [Phoenix dactylifera]	17.5238	3.3376	0.0001	38.4366	32.1788	35.7937	0.19605	-2.35071	down
ko00940	Phenylpropanoid biosynthesis	0.000825618	MSTRG.13390	HHC013542	K00679;K01188	EC:2.3.1.158;EC:3.2.1.21	GDSL esterase/lipase At5g55050-like isoform X1 [Asparagus officinalis];uncharacterized protein A4U43_C03F11750 [Asparagus officinalis]	21.3611	18.2979	16.3496	0.631819	1.01982	1.13903	20.07	4.32697	up
ko00940	Phenylpropanoid biosynthesis	0.000825618	MSTRG.13506	HHC013702	K00430	EC:1.11.1.7	PREDICTED: uncharacterized protein LOC105052151 [Elaeis guineensis]	0.446532	2.02827	0.382241	0.0923006	0.0477236	0.0455438	15.3962	3.9445	up
ko00940	Phenylpropanoid biosynthesis	0.000825618	MSTRG.13507	HHC013703	K00430	EC:1.11.1.7	PREDICTED: uncharacterized protein LOC105052151 [Elaeis guineensis]	18.6108	51.2075	8.09883	3.96152	3.67345	3.36987	7.08026	2.8238	up
ko00940	Phenylpropanoid biosynthesis	0.000825618	MSTRG.14178	HHC014631	K00430	EC:1.11.1.7	PREDICTED: peroxidase 17 [Elaeis guineensis]	51.947	41.999	87.5293	8.81818	9.8246	9.56289	6.434	2.68572	up
ko00940	Phenylpropanoid biosynthesis	0.000825618	MSTRG.14805	HHC015505	K00083	EC:1.1.1.195	Cinnamyl alcohol dehydrogenase [Zostera marina]	0.710834	0.62235	1.44452	0.254334	0.0001	0.0001	10.9129	3.44796	up
ko00940	Phenylpropanoid biosynthesis	0.000825618	MSTRG.15288	HHC016053	K00430	EC:1.11.1.7	peroxidase 12-like [Ananas comosus]	11.8806	8.56774	2.32096	29.397	29.9747	26.9475	0.26378	-1.92259	down
ko00940	Phenylpropanoid biosynthesis	0.000825618	MSTRG.15622	HHC016510	K09755	EC:1.14.-.-	cytochrome P450 84A1-like [Phoenix dactylifera]	16.0983	11.6373	26.1197	6.78079	6.63602	6.46777	2.70839	1.43744	up
ko00940	Phenylpropanoid biosynthesis	0.000825618	MSTRG.15623	HHC016509	K09755	EC:1.14.-.-	cytochrome P450 84A1-like [Phoenix dactylifera]	33.8835	48.5913	105.868	6.96005	3.15614	7.27946	10.827	3.43656	up
ko00940	Phenylpropanoid biosynthesis	0.000825618	MSTRG.15901	HHC016851	K00083	EC:1.1.1.195	probable cinnamyl alcohol dehydrogenase 1 isoform X3 [Ananas comosus];probable cinnamyl alcohol dehydrogenase 1 isoform X2 [Ananas comosus]	6.43963	5.28314	13.7077	2.07209	1.98976	1.73874	4.38412	2.13229	up
ko00940	Phenylpropanoid biosynthesis	0.000825618	MSTRG.16105	HHC017130	K12355	EC:1.2.1.68	aldehyde dehydrogenase family 2 member C4-like [Asparagus officinalis];LOW QUALITY PROTEIN: aldehyde dehydrogenase family 2 member C4-like [Asparagus officinalis];aldehyde dehydrogenase family 2 member C4-like [Phoenix dactylifera];PREDICTED: aldehyde dehydrogenase family 2 member C4 [Elaeis guineensis]	181.623	1085.87	167.924	103.635	103.329	107.494	4.56473	2.19053	up
ko00940	Phenylpropanoid biosynthesis	0.000825618	MSTRG.16556	HHC017744	K06892	EC:1.14.11.-	protein DMR6-LIKE OXYGENASE 2-like [Asparagus officinalis]	112.204	76.9189	118.039	35.0087	35.6478	35.9669	2.88081	1.52647	up
ko00940	Phenylpropanoid biosynthesis	0.000825618	MSTRG.1663	HHC002126	K05349	EC:3.2.1.21	beta-D-glucan exohydolase [Elaeis guineensis];uncharacterized protein LOC109844507 [Asparagus officinalis]	39.1682	17.5186	0.0001	214.432	219.056	213.677	0.0875928	-3.51304	down
ko00940	Phenylpropanoid biosynthesis	0.000825618	MSTRG.1682	HHC002162	K13065	EC:2.3.1.133	hydroxycinnamoyltransferase [Narcissus pseudonarcissus]	5.16179	4.48153	4.59197	1.60056	1.37868	1.79643	2.9808	1.5757	up
ko00940	Phenylpropanoid biosynthesis	0.000825618	MSTRG.17221	HHC018647	K09753	EC:1.2.1.44	PREDICTED: cinnamoyl-CoA reductase 1-like [Elaeis guineensis]	30.7466	13.9575	13.2859	53.9163	56.8695	56.265	0.34714	-1.52641	down
ko00940	Phenylpropanoid biosynthesis	0.000825618	MSTRG.17535	HHC019106	K00430	EC:1.11.1.7	vacuolar iron transporter homolog 4-like [Phoenix dactylifera]	8.7272	1.15561	1.72368	0.480228	0.533592	0.50808	7.62631	2.93099	up
ko00940	Phenylpropanoid biosynthesis	0.000825618	MSTRG.17592	HHC019185	K00430	EC:1.11.1.7	unnamed protein product [Coffea canephora]	27.1214	20.9133	21.2174	9.01457	9.93518	9.75042	2.41295	1.2708	up
ko00940	Phenylpropanoid biosynthesis	0.000825618	MSTRG.17628	HHC019246	K00430	EC:1.11.1.7	LOW QUALITY PROTEIN: peroxidase 47-like [Asparagus officinalis];peroxidase 47 [Phoenix dactylifera]	217.463	177.632	152.333	53.9766	59.3391	53.8594	3.27458	1.71131	up
ko00940	Phenylpropanoid biosynthesis	0.000825618	MSTRG.17759	HHC019457	K01188	EC:3.2.1.21	beta-glucosidase 31-like isoform X1 [Asparagus officinalis]	6.43743	6.93888	11.0506	2.00614	2.14781	2.65067	3.58976	1.84389	up
ko00940	Phenylpropanoid biosynthesis	0.000825618	MSTRG.17884	HHC019706	K00430	EC:1.11.1.7	probable peroxidase 61 [Asparagus officinalis]	0.114375	0.584646	0.0271785	7.89236	7.59922	8.25872	0.0305764	-5.03144	down
ko00940	Phenylpropanoid biosynthesis	0.000825618	MSTRG.18573	HHC020791	K09753	EC:1.2.1.44	uncharacterized protein A4U43_C04F14070 [Asparagus officinalis]	5.14881	6.21354	8.56859	2.0196	2.28961	1.53019	3.41318	1.77112	up
ko00940	Phenylpropanoid biosynthesis	0.000825618	MSTRG.18745	HHC021025	K00430	EC:1.11.1.7	PREDICTED: vacuolar iron transporter homolog 2-like [Elaeis guineensis]	5.51641	2.19078	1.71184	0.281757	0.155812	0.241771	13.865	3.79337	up
ko00940	Phenylpropanoid biosynthesis	0.000825618	MSTRG.18755	HHC021043	K09755	EC:1.14.-.-	LOW QUALITY PROTEIN: cytochrome P450 84A1-like [Asparagus officinalis]	20.2946	25.6959	33.4959	10.3537	9.48305	10.5119	2.6191	1.38907	up
ko00940	Phenylpropanoid biosynthesis	0.000825618	MSTRG.19314	HHC021795	K00588	EC:2.1.1.104	caffeoyl-CoA O-methyltransferase [Amborella trichopoda]	180.418	185.076	309.466	83.7505	98.4039	97.4312	2.41415	1.27151	up
ko00940	Phenylpropanoid biosynthesis	0.000825618	MSTRG.20579	HHC023512	K00430	EC:1.11.1.7	vacuolar iron transporter homolog 4-like [Phoenix dactylifera]	18.3802	5.2906	6.58948	0.901897	0.416317	1.24438	11.8084	3.56175	up
ko00940	Phenylpropanoid biosynthesis	0.000825618	MSTRG.20662	HHC023658	K13065	EC:2.3.1.133	LOW QUALITY PROTEIN: BAHD acyltransferase At5g47980-like [Asparagus officinalis]	24.292	14.1979	15.0968	0.466332	0.974464	1.58288	17.7224	4.1475	up
ko00940	Phenylpropanoid biosynthesis	0.000825618	MSTRG.20963	HHC024181	K00430	EC:1.11.1.7	uncharacterized protein LOC109825922 isoform X1 [Asparagus officinalis]	3.44905	1.98923	5.03113	1.18182	1.31643	1.33361	2.7322	1.45006	up
ko00940	Phenylpropanoid biosynthesis	0.000825618	MSTRG.21151	HHC024542	K09755	EC:1.14.-.-	PREDICTED: cytochrome P450 84A1-like [Elaeis guineensis]	30.8008	30.783	31.6041	2.23648	3.56731	3.13255	10.428	3.38239	up
ko00940	Phenylpropanoid biosynthesis	0.000825618	MSTRG.21273	HHC024759	K09755	EC:1.14.-.-	PREDICTED: cytochrome P450 84A1-like [Elaeis guineensis]	16.1636	2.98671	9.89678	2.54106	3.59875	2.69323	3.28845	1.71741	up
ko00940	Phenylpropanoid biosynthesis	0.000825618	MSTRG.21511	HHC025092	K00083	EC:1.1.1.195	8-hydroxygeraniol dehydrogenase-like [Asparagus officinalis]	276.202	149.371	287.445	630.984	637.87	625.119	0.376466	-1.40941	down
ko00940	Phenylpropanoid biosynthesis	0.000825618	MSTRG.21525	HHC025105	K13065	EC:2.3.1.133	LOW QUALITY PROTEIN: protein ECERIFERUM 26-like [Asparagus officinalis]	55.1196	46.6684	58.1402	11.666	10.6915	10.5407	4.8613	2.28134	up
ko00940	Phenylpropanoid biosynthesis	0.000825618	MSTRG.21531	HHC025124	K00430	EC:1.11.1.7	peroxidase 42-like [Asparagus officinalis]	807.449	402.766	164.85	1390.56	1400.49	1392.32	0.328698	-1.60517	down
ko00940	Phenylpropanoid biosynthesis	0.000825618	MSTRG.21575	HHC025173	K00430	EC:1.11.1.7	peroxidase 27-like [Asparagus officinalis]	10.3886	4.98612	1.99099	18.345	17.8465	19.2652	0.31314	-1.67512	down
ko00940	Phenylpropanoid biosynthesis	0.000825618	MSTRG.21832	HHC025499	K05349	EC:3.2.1.21	uncharacterized protein A4U43_C03F4470 [Asparagus officinalis]	0.0001	0.500271	0.732698	3.78517	3.7012	4.28767	0.104728	-3.25528	down
ko00940	Phenylpropanoid biosynthesis	0.000825618	MSTRG.21852	HHC025515	K01904	EC:6.2.1.12	4-coumarate-CoA ligase 3 [Narcissus papyraceus]	3.23588	0.907973	2.10718	6.18602	6.52559	6.12871	0.33179	-1.59166	down
ko00940	Phenylpropanoid biosynthesis	0.000825618	MSTRG.23307	HHC027989	K01188	EC:3.2.1.21	Polygalacturonase inhibitor [Ananas comosus]	113.601	52.0981	44.043	14.0621	13.7259	13.2846	5.10662	2.35237	up
ko00940	Phenylpropanoid biosynthesis	0.000825618	MSTRG.2479	HHC003356	K01188	EC:3.2.1.21	uncharacterized protein At3g49720-like [Asparagus officinalis]	188.246	113.208	87.922	368.522	489.29	384.061	0.313539	-1.67328	down
ko00940	Phenylpropanoid biosynthesis	0.000825618	MSTRG.24924	HHC030159	K00430	EC:1.11.1.7	peroxidase 3-like [Asparagus officinalis]	38.45	19.9276	204.831	18.2346	16.0013	19.0237	4.942	2.30509	up
ko00940	Phenylpropanoid biosynthesis	0.000825618	MSTRG.25115	HHC030436	K00083	EC:1.1.1.195	putative mannitol dehydrogenase [Apostasia shenzhenica]	15.0771	6.14999	3.07956	30.3927	19.5341	26.8446	0.316611	-1.65922	down
ko00940	Phenylpropanoid biosynthesis	0.000825618	MSTRG.25277	HHC030696	K01188	EC:3.2.1.21	polygalacturonase inhibitor-like [Asparagus officinalis]	47.0462	22.9127	6.10668	64.2167	67.0857	73.401	0.371589	-1.42822	down
ko00940	Phenylpropanoid biosynthesis	0.000825618	MSTRG.25973	HHC031952	K00430	EC:1.11.1.7	PREDICTED: LOW QUALITY PROTEIN: peroxidase 19 [Elaeis guineensis]	1.31999	0.555742	0.0001	37.3442	37.7774	42.2709	0.0159792	-5.96767	down
ko00940	Phenylpropanoid biosynthesis	0.000825618	MSTRG.26311	HHC032504	K00430	EC:1.11.1.7	LOW QUALITY PROTEIN: peroxidase N-like [Asparagus officinalis]	102.277	110.463	317.926	36.256	32.2544	37.7543	4.99381	2.32014	up
ko00940	Phenylpropanoid biosynthesis	0.000825618	MSTRG.26446	HHC032725	K00083	EC:1.1.1.195	probable cinnamyl alcohol dehydrogenase 6 [Asparagus officinalis]	77.286	88.4121	138.539	33.2586	35.7183	30.8049	3.04902	1.60835	up
ko00940	Phenylpropanoid biosynthesis	0.000825618	MSTRG.26768	HHC033187	K01188	EC:3.2.1.21	polygalacturonase inhibitor [Sorghum bicolor]	2.068	0.746209	0.109721	10.6295	11.4679	13.1318	0.0829972	-3.59079	down
ko00940	Phenylpropanoid biosynthesis	0.000825618	MSTRG.26858	HHC033319	K13065	EC:2.3.1.133	PREDICTED: putrescine hydroxycinnamoyltransferase 1-like [Elaeis guineensis]	4.37986	1.08276	0.116352	10.9057	10.3212	10.4837	0.175934	-2.5069	down
ko00940	Phenylpropanoid biosynthesis	0.000825618	MSTRG.26868	HHC033331	K09753	EC:1.2.1.44	cinnamoyl-CoA reductase 1-like [Asparagus officinalis]	24.1383	6.60273	4.62017	149.724	141.316	153.89	0.0794759	-3.65334	down
ko00940	Phenylpropanoid biosynthesis	0.000825618	MSTRG.27291	HHC034149	K01188	EC:3.2.1.21	beta-glucosidase 11-like [Asparagus officinalis]	12.3557	23.547	16.2438	5.88794	4.91401	5.81576	3.13801	1.64985	up
ko00940	Phenylpropanoid biosynthesis	0.000825618	MSTRG.27294	HHC034151	K01188	EC:3.2.1.21	beta-glucosidase 22-like [Asparagus officinalis]	11.3682	15.6849	15.4961	3.9947	3.99397	4.62793	3.37248	1.75381	up
ko00940	Phenylpropanoid biosynthesis	0.000825618	MSTRG.27384	HHC034302	K00430	EC:1.11.1.7	PREDICTED: peroxidase 5-like [Elaeis guineensis]	105.389	95.2737	144.647	7.29189	9.12204	8.39846	13.9168	3.79876	up
ko00940	Phenylpropanoid biosynthesis	0.000825618	MSTRG.27480	HHC034448	K01188	EC:3.2.1.21	Polygalacturonase inhibitor 1, partial [Mucuna pruriens]	211.324	103	31.9157	374.156	365.771	357.705	0.315442	-1.66455	down
ko00940	Phenylpropanoid biosynthesis	0.000825618	MSTRG.27684	HHC034774	K00083	EC:1.1.1.195	probable cinnamyl alcohol dehydrogenase [Asparagus officinalis]	75.1373	60.4886	119.084	24.8932	22.2055	27.1671	3.4297	1.77808	up
ko00940	Phenylpropanoid biosynthesis	0.000825618	MSTRG.27932	HHC035137	K01188	EC:3.2.1.21	PREDICTED: beta-glucosidase 4 isoform X1 [Elaeis guineensis]	270.85	240.566	289.253	128.21	136.79	128.979	2.03226	1.02309	up
ko00940	Phenylpropanoid biosynthesis	0.000825618	MSTRG.2800	HHC003888	K00430	EC:1.11.1.7	peroxidase 21 [Asparagus officinalis]	27.3412	7.44463	33.5059	4.03166	4.39459	5.33328	4.96323	2.31128	up
ko00940	Phenylpropanoid biosynthesis	0.000825618	MSTRG.28110	HHC035380	K00430	EC:1.11.1.7	Vacuolar iron transporter like 4 [Dendrobium catenatum]	5.07907	4.01368	11.7457	1.33853	1.05408	1.23516	5.74415	2.52209	up
ko00940	Phenylpropanoid biosynthesis	0.000825618	MSTRG.28174	HHC035472	K01188	EC:3.2.1.21	polygalacturonase inhibitor-like [Asparagus officinalis]	63.1739	22.8458	16.0643	4.43628	5.0723	6.76668	6.27234	2.649	up
ko00940	Phenylpropanoid biosynthesis	0.000825618	MSTRG.28175	HHC035474	K01188	EC:3.2.1.21	PREDICTED: polygalacturonase inhibitor-like [Elaeis guineensis]	10.3302	24.8473	1.77163	2.87189	2.6975	3.14574	4.23965	2.08395	up
ko00940	Phenylpropanoid biosynthesis	0.000825618	MSTRG.28499	HHC035916	K10775	EC:4.3.1.24	phenylalanine ammonia lyase 62 [Ornithogalum longebracteatum]	114.795	53.2824	105.98	26.4088	27.8919	27.5824	3.34693	1.74284	up
ko00940	Phenylpropanoid biosynthesis	0.000825618	MSTRG.28521	HHC035946	K06892	EC:1.14.11.-	PREDICTED: protein DMR6-LIKE OXYGENASE 2-like [Elaeis guineensis]	1.90121	12.7825	2.80335	0.749243	0.639045	0.61602	8.72474	3.12511	up
ko00940	Phenylpropanoid biosynthesis	0.000825618	MSTRG.2874	HHC004003	K00430	EC:1.11.1.7	probable peroxidase 61 [Asparagus officinalis]	3.94167	3.57187	0.0001	62.4251	62.1072	56.1865	0.0415764	-4.58809	down
ko00940	Phenylpropanoid biosynthesis	0.000825618	MSTRG.30546	HHC038983	K00430	EC:1.11.1.7	peroxidase 20 [Asparagus officinalis]	1.26769	1.82996	0.0001	0.0001	0.0001	0.0001	10325.8	13.334	up
ko00940	Phenylpropanoid biosynthesis	0.000825618	MSTRG.30874	HHC039414	K01904	EC:6.2.1.12	4-coumarate--CoA ligase-like 6 [Asparagus officinalis]	4.27844	11.4237	7.5976	34.5772	36.3038	32.1267	0.226194	-2.14436	down
ko00940	Phenylpropanoid biosynthesis	0.000825618	MSTRG.31163	HHC039783	K00430	EC:1.11.1.7	peroxidase 17 [Ananas comosus]	53.831	53.8002	76.0942	22.3522	18.4068	27.5974	2.68776	1.4264	up
ko00940	Phenylpropanoid biosynthesis	0.000825618	MSTRG.31578	HHC040323	K00430	EC:1.11.1.7	peroxidase 30-like [Asparagus officinalis]	0.646103	0.333499	0.0001	2.79968	2.40361	2.10767	0.134005	-2.89965	down
ko00940	Phenylpropanoid biosynthesis	0.000825618	MSTRG.31607	HHC040408	K00430	EC:1.11.1.7	peroxidase 42-like [Asparagus officinalis]	3512.29	867.065	589.705	6090.43	6099.32	6092.19	0.271801	-1.87938	down
ko00940	Phenylpropanoid biosynthesis	0.000825618	MSTRG.31871	HHC051645	K01188	EC:3.2.1.21	uncharacterized protein At3g49720-like [Asparagus officinalis]	80.897	40.7954	48.8844	136.396	124.766	129.961	0.436121	-1.1972	down
ko00940	Phenylpropanoid biosynthesis	0.000825618	MSTRG.32609	HHC048541	K00430	EC:1.11.1.7	peroxidase 12 [Phoenix dactylifera]	48.2191	69.5886	85.929	8.40115	7.29468	14.9589	6.64617	2.73252	up
ko00940	Phenylpropanoid biosynthesis	0.000825618	MSTRG.33088	HHC049544	K09755	EC:1.14.-.-	cytochrome P450 84A1-like [Phoenix dactylifera]	159.867	121.547	281.732	65.4918	63.6832	61.9845	2.94595	1.55873	up
ko00940	Phenylpropanoid biosynthesis	0.000825618	MSTRG.33093	HHC049545	K09755	EC:1.14.-.-	cytochrome P450 84A1-like [Phoenix dactylifera]	219.527	215.413	498.458	39.5058	31.5332	50.2152	7.69786	2.94446	up
ko00940	Phenylpropanoid biosynthesis	0.000825618	MSTRG.33098	HHC049554	K00430	EC:1.11.1.7	PREDICTED: vacuolar iron transporter homolog 2-like [Elaeis guineensis]	5.47758	4.69621	7.84444	0.386766	0.975651	0.47824	9.78902	3.29116	up
ko00940	Phenylpropanoid biosynthesis	0.000825618	MSTRG.33304	HHC048847	K00430	EC:1.11.1.7	unnamed protein product [Coffea canephora]	3.50783	2.24483	1.95749	0.683991	1.00547	0.761669	3.14555	1.65331	up
ko00940	Phenylpropanoid biosynthesis	0.000825618	MSTRG.33493	HHC052927	K00430	EC:1.11.1.7	PREDICTED: vacuolar iron transporter homolog 2-like [Elaeis guineensis]	10.113	5.95177	5.77154	0.783971	0.353125	0.528266	13.112	3.71282	up
ko00940	Phenylpropanoid biosynthesis	0.000825618	MSTRG.33550	HHC053582	K00588	EC:2.1.1.104	PREDICTED: caffeoyl-CoA O-methyltransferase [Nelumbo nucifera];caffeoyl-CoA O-methyltransferase [Amborella trichopoda]	67.7403	65.0487	99.6633	33.5987	32.1041	34.7515	2.31401	1.21039	up
ko00940	Phenylpropanoid biosynthesis	0.000825618	MSTRG.33817	HHC050735	K00083	EC:1.1.1.195	probable cinnamyl alcohol dehydrogenase [Asparagus officinalis]	9.21898	7.41065	15.1869	2.27002	3.20309	2.15669	4.17004	2.06006	up
ko00940	Phenylpropanoid biosynthesis	0.000825618	MSTRG.34443	HHC053641	K01188	EC:3.2.1.21	polygalacturonase inhibitor [Sorghum bicolor]	1.98732	2.03174	0.0691012	22.543	24.2066	25.7951	0.0563537	-4.14935	down
ko00940	Phenylpropanoid biosynthesis	0.000825618	MSTRG.34610	HHC047825	K00430	EC:1.11.1.7	peroxidase 15 [Phoenix dactylifera]	3.12509	0.677194	3.05336	1.22736	0.356737	0.435069	3.39529	1.76353	up
ko00940	Phenylpropanoid biosynthesis	0.000825618	MSTRG.35274	HHC051788	K00430	EC:1.11.1.7	peroxidase 12-like [Ananas comosus]	53.6674	33.8033	0.68932	145.767	191.247	145.329	0.182775	-2.45186	down
ko00940	Phenylpropanoid biosynthesis	0.000825618	MSTRG.35485	HHC054264	K00430	EC:1.11.1.7	peroxidase 51-like protein [Cinnamomum micranthum f. kanehirae]	12.0469	5.87428	3.15912	168.578	167.563	149.121	0.0434411	-4.5248	down
ko00940	Phenylpropanoid biosynthesis	0.000825618	MSTRG.36022	HHC052616	K01188	EC:3.2.1.21	uncharacterized protein At3g49720-like [Asparagus officinalis]	17.131	10.2667	12.0627	28.3985	31.5048	28.5608	0.446062	-1.16468	down
ko00940	Phenylpropanoid biosynthesis	0.000825618	MSTRG.3996	HHC005902	K00430	EC:1.11.1.7	peroxidase 4-like [Asparagus officinalis]	14.0811	2.32421	0.234396	22.0139	24.2426	21.7522	0.244671	-2.03109	down
ko00940	Phenylpropanoid biosynthesis	0.000825618	MSTRG.4454	HHC040845	K05349	EC:3.2.1.21	uncharacterized protein LOC109832911 [Asparagus officinalis]	5.48685	5.93266	1.99184	19.8679	29.6713	23.6609	0.183215	-2.44839	down
ko00940	Phenylpropanoid biosynthesis	0.000825618	MSTRG.4561	HHC041085	K00430	EC:1.11.1.7	peroxidase 31 [Phoenix dactylifera];PREDICTED: peroxidase 31-like [Musa acuminata subsp. malaccensis]	120.166	68.2534	62.753	276.958	289.31	282.181	0.296037	-1.75615	down
ko00940	Phenylpropanoid biosynthesis	0.000825618	MSTRG.4888	HHC041642	K00430	EC:1.11.1.7	peroxidase 5-like [Asparagus officinalis]	10.5765	5.04237	15.843	4.31831	3.2154	3.12043	2.95301	1.56219	up
ko00940	Phenylpropanoid biosynthesis	0.000825618	MSTRG.5107	HHC041998	K01188	EC:3.2.1.21	hypothetical protein C2845_PM15G11590 [Panicum miliaceum]	13.8576	21.0224	11.0076	1.11642	1.25075	1.3605	12.31	3.62176	up
ko00940	Phenylpropanoid biosynthesis	0.000825618	MSTRG.5209	HHC042167	K00430	EC:1.11.1.7	peroxidase 51-like protein [Cinnamomum micranthum f. kanehirae]	2.4357	1.25897	0.392147	13.8549	24.8828	23.718	0.0654354	-3.93379	down
ko00940	Phenylpropanoid biosynthesis	0.000825618	MSTRG.6029	HHC043303	K10775	EC:4.3.1.24	phenylalanine ammonia lyase 62 [Ornithogalum longebracteatum]	40.7987	32.116	50.9992	11.4015	11.5028	12.1541	3.5345	1.82151	up
ko00940	Phenylpropanoid biosynthesis	0.000825618	MSTRG.6226	HHC043567	K00430	EC:1.11.1.7	peroxidase 64 [Asparagus officinalis]	3.17624	0.602511	1.08632	10.0766	7.2888	8.50157	0.188081	-2.41058	down
ko00940	Phenylpropanoid biosynthesis	0.000825618	MSTRG.6756	HHC044281	K01188	EC:3.2.1.21	uncharacterized protein At3g49720-like [Asparagus officinalis]	63.5508	37.4445	51.3109	114.688	85.2779	111.183	0.489495	-1.03063	down
ko00940	Phenylpropanoid biosynthesis	0.000825618	MSTRG.6919	HHC044497	K00430	EC:1.11.1.7	peroxidase 72-like [Asparagus officinalis]	63.8324	27.0943	10.031	193.955	204.478	207.717	0.166555	-2.58593	down
ko00940	Phenylpropanoid biosynthesis	0.000825618	MSTRG.7247	HHC044860	K10775	EC:4.3.1.24	LOW QUALITY PROTEIN: phenylalanine ammonia-lyase-like [Ananas comosus]	326.627	194.831	270.582	69.0981	59.8402	60.07	4.19051	2.06712	up
ko00940	Phenylpropanoid biosynthesis	0.000825618	MSTRG.7689	HHC045586	K05349	EC:3.2.1.21	uncharacterized protein LOC109832911 [Asparagus officinalis]	279.99	244.089	72.3661	1134.49	1137.25	1105.88	0.176587	-2.50154	down
ko00940	Phenylpropanoid biosynthesis	0.000825618	MSTRG.8092	HHC046446	K05278;K06892	EC:1.14.20.6;EC:1.14.11.-	S-norcoclaurine synthase 1-like [Asparagus officinalis]	143.386	281.858	255.636	54.894	58.4515	57.9537	3.9748	1.99088	up
ko00940	Phenylpropanoid biosynthesis	0.000825618	MSTRG.8392	HHC046922	K01188	EC:3.2.1.21	beta-glucosidase 12-like [Asparagus officinalis]	287.86	808.809	432.242	171.054	173.547	165.509	2.99722	1.58362	up
ko00940	Phenylpropanoid biosynthesis	0.000825618	MSTRG.8563	HHC047137	K00430	EC:1.11.1.7	LOW QUALITY PROTEIN: peroxidase 12-like [Asparagus officinalis]	124.44	73.4319	0.629695	899.269	892.08	884.524	0.0741821	-3.75279	down
ko00940	Phenylpropanoid biosynthesis	0.000825618	MSTRG.8926	HHC006511	K01188	EC:3.2.1.21	hypothetical protein SORBI_3006G117400 [Sorghum bicolor]	3.24146	0.648214	0.899732	0.0452092	0.0717129	0.224564	14.0252	3.80995	up
ko00940	Phenylpropanoid biosynthesis	0.000825618	MSTRG.9401	HHC007194	K10775	EC:4.3.1.24	phenylalanine ammonia lyase 2 [Ornithogalum longebracteatum]	154.397	80.1758	49.8952	49.7849	37.951	50.5448	2.05718	1.04067	up
ko00940	Phenylpropanoid biosynthesis	0.000825618	MSTRG.9776	HHC007971	K05349	EC:3.2.1.21	uncharacterized protein LOC109843897 [Asparagus officinalis];uncharacterized protein A4U43_C05F16790 [Asparagus officinalis]	14.7651	11.0121	3.84358	67.4337	52.238	62.4398	0.162652	-2.62014	down
ko00940	Phenylpropanoid biosynthesis	0.000825618	MSTRG.9947	HHC008326	K00083	EC:1.1.1.195	importin-11 isoform X1 [Asparagus officinalis]	6.32185	4.00627	5.05514	15.3838	18.6146	16.1171	0.306956	-1.7039	down
ko00940	Phenylpropanoid biosynthesis	0.000825618	MSTRG.9991	HHC008428	K00430	EC:1.11.1.7	cationic peroxidase 1-like [Phoenix dactylifera]	7.82233	3.27351	5.4316	1.08225	0.867013	0.856591	5.89034	2.55835	up
ko00940	Phenylpropanoid biosynthesis	0.000825618	MSTRG.9992	HHC008430	K00430	EC:1.11.1.7	peroxidase 4-like [Asparagus officinalis]	5.94719	2.50885	3.58863	0.670177	1.15522	0.887231	4.44023	2.15063	up
ko00660	C5-Branched dibasic acid metabolism	0.00169982	MSTRG.23589	HHC028413	K01652	EC:2.2.1.6	C2 domain-containing protein At1g53590-like isoform X2 [Asparagus officinalis]	145.642	159.086	183.088	75.529	75.1969	69.7913	2.21214	1.14545	up
ko00660	C5-Branched dibasic acid metabolism	0.00169982	MSTRG.23999	HHC028891	K00052	EC:1.1.1.85	3-isopropylmalate dehydrogenase 2, chloroplastic-like [Asparagus officinalis]	2.42991	3.0409	1.09005	9.52967	8.55223	5.40812	0.279304	-1.84009	down
ko00660	C5-Branched dibasic acid metabolism	0.00169982	MSTRG.24481	HHC029546	K01652	EC:2.2.1.6	acetolactate synthase 1, chloroplastic [Phoenix dactylifera]	276.66	3403.64	131.654	445.9	449.506	430.244	2.87554	1.52383	up
ko00660	C5-Branched dibasic acid metabolism	0.00169982	MSTRG.27615	HHC034642	K01653	EC:2.2.1.6	LOW QUALITY PROTEIN: acetolactate synthase small subunit 2, chloroplastic-like [Asparagus officinalis]	1.84501	29.9057	5.19787	1.99703	1.80426	2.64895	5.72824	2.51809	up
ko00660	C5-Branched dibasic acid metabolism	0.00169982	MSTRG.30659	HHC039129	K01653	EC:2.2.1.6	acetolactate synthase small subunit 2, chloroplastic-like isoform X2 [Momordica charantia];PREDICTED: acetolactate synthase small subunit 2, chloroplastic [Musa acuminata subsp. malaccensis]	9.28844	4.73263	4.49862	30.5142	28.8952	32.2091	0.202139	-2.30658	down
ko00660	C5-Branched dibasic acid metabolism	0.00169982	MSTRG.3153	HHC004495	K01653	EC:2.2.1.6	PREDICTED: acetolactate synthase small subunit 2, chloroplastic [Musa acuminata subsp. malaccensis];acetolactate synthase small subunit 2, chloroplastic-like [Ananas comosus]	4.19918	2.50018	0.195346	15.0595	14.6561	12.0943	0.164905	-2.60029	down
ko00660	C5-Branched dibasic acid metabolism	0.00169982	MSTRG.32056	HHC053981	K01653	EC:2.2.1.6	Acetolactate synthase small subunit 2, chloroplastic [Ananas comosus];LOW QUALITY PROTEIN: acetolactate synthase small subunit 2, chloroplastic-like [Asparagus officinalis]	30.3662	189.252	16.072	16.2135	13.5213	9.01081	6.08301	2.60478	up
ko00660	C5-Branched dibasic acid metabolism	0.00169982	MSTRG.32059	HHC053985	K01653	EC:2.2.1.6	LOW QUALITY PROTEIN: acetolactate synthase small subunit 2, chloroplastic-like [Asparagus officinalis]	11.8095	80.0249	12.3121	7.2186	6.68691	6.78005	5.03474	2.33192	up
ko00660	C5-Branched dibasic acid metabolism	0.00169982	MSTRG.35175	HHC051926	K00052	EC:1.1.1.85	3-isopropylmalate dehydrogenase 2, chloroplastic-like [Asparagus officinalis]	6.0483	2.67157	5.06847	15.4973	17.1436	13.0121	0.302025	-1.72726	down
ko00660	C5-Branched dibasic acid metabolism	0.00169982	MSTRG.36171	HHC049467	K00052	EC:1.1.1.85	3-isopropylmalate dehydrogenase 2, chloroplastic-like [Asparagus officinalis]	22.6575	17.6851	14.5144	74.3145	73.6055	89.5786	0.230978	-2.11417	down
ko00660	C5-Branched dibasic acid metabolism	0.00169982	MSTRG.8383	HHC046904	K00052	EC:1.1.1.85	3-isopropylmalate dehydrogenase 2, chloroplastic-like [Asparagus officinalis]	12.5036	8.20337	6.08551	22.9338	25.8374	27.0956	0.353152	-1.50164	down
ko00020	Citrate cycle (TCA cycle)	0.00177144	gene-HHC023085	HHC023085	K01647	EC:2.3.3.1	citrate synthase 4, mitochondrial-like [Asparagus officinalis]	2.2049	0.328387	0.19771	4.30801	3.75899	3.22327	0.241889	-2.04758	down
ko00020	Citrate cycle (TCA cycle)	0.00177144	gene-HHC043068	HHC043068	K01899	EC:6.2.1.4;EC:6.2.1.5	plastid division protein CDP1, chloroplastic [Asparagus officinalis]	2.82863	2.80477	3.77363	11.1538	7.81176	8.73286	0.339623	-1.55799	down
ko00020	Citrate cycle (TCA cycle)	0.00177144	gene-HHC049086	HHC049086	K01899	EC:6.2.1.4;EC:6.2.1.5	plastid division protein CDP1, chloroplastic [Asparagus officinalis]	1.28829	0.931356	1.52112	3.33648	2.63732	3.29653	0.40352	-1.30929	down
ko00020	Citrate cycle (TCA cycle)	0.00177144	gene-HHC052788	HHC052788	K01647	EC:2.3.3.1	citrate synthase 4, mitochondrial-like [Asparagus officinalis]	0.936199	1.48729	0.0001	5.37411	6.53673	8.20756	0.120466	-3.0533	down
ko00020	Citrate cycle (TCA cycle)	0.00177144	MSTRG.11159	HHC010243	K00627	EC:2.3.1.12	hypothetical protein CARUB_v10008900mg, partial [Capsella rubella]	7.98496	7.06829	5.79307	18.5274	19.3052	19.3239	0.364724	-1.45512	down
ko00020	Citrate cycle (TCA cycle)	0.00177144	MSTRG.11194	HHC010274	K00030	EC:1.1.1.41	isocitrate dehydrogenase [NAD] catalytic subunit 5, mitochondrial-like [Asparagus officinalis]	3.78589	2.18349	2.86575	8.022	4.53554	7.98103	0.430173	-1.21701	down
ko00020	Citrate cycle (TCA cycle)	0.00177144	MSTRG.12233	HHC011657	K00026	EC:1.1.1.37	PREDICTED: malate dehydrogenase, mitochondrial [Elaeis guineensis]	3.3787	2.44772	1.07312	25.0958	24.9952	22.4847	0.0950669	-3.39491	down
ko00020	Citrate cycle (TCA cycle)	0.00177144	MSTRG.12687	HHC012335	K00234	EC:1.3.5.1	succinate dehydrogenase [ubiquinone] flavoprotein subunit, mitochondrial [Asparagus officinalis]	15.4568	15.0578	11.7682	38.1171	40.1434	36.1198	0.369669	-1.43569	down
ko00020	Citrate cycle (TCA cycle)	0.00177144	MSTRG.12854	HHC012682	K00026	EC:1.1.1.37	malate dehydrogenase, chloroplastic-like [Asparagus officinalis]	49.2242	2.85661	52.4519	5.88209	5.46936	4.01637	6.80205	2.76597	up
ko00020	Citrate cycle (TCA cycle)	0.00177144	MSTRG.1321	HHC001670	K00627	EC:2.3.1.12	dihydrolipoyllysine-residue acetyltransferase component 5 of pyruvate dehydrogenase complex, chloroplastic [Helianthus annuus]	15.8102	13.206	14.1214	35.7105	36.1109	36.074	0.39981	-1.32261	down
ko00020	Citrate cycle (TCA cycle)	0.00177144	MSTRG.13853	HHC014177	K00026	EC:1.1.1.37	malate dehydrogenase, mitochondrial [Asparagus officinalis]	61.7233	61.2375	48.9975	186.715	191.933	188.259	0.303327	-1.72105	down
ko00020	Citrate cycle (TCA cycle)	0.00177144	MSTRG.15274	HHC016040	K00030	EC:1.1.1.41	isocitrate dehydrogenase [NAD] regulatory subunit 1, mitochondrial-like isoform X1 [Asparagus officinalis]	15.1682	15.8426	13.3463	51.1971	50.4322	52.7479	0.28733	-1.79922	down
ko00020	Citrate cycle (TCA cycle)	0.00177144	MSTRG.15763	HHC016671	K00025	EC:1.1.1.37	malate dehydrogenase [Sesamum indicum]	0.277704	0.169027	0.352211	0.736709	0.934298	0.737565	0.331708	-1.59202	down
ko00020	Citrate cycle (TCA cycle)	0.00177144	MSTRG.15859	HHC016786	K00161	EC:1.2.4.1	H0716A07.7 [Oryza sativa];pyruvate dehydrogenase E1 component subunit alpha-3, chloroplastic [Brachypodium distachyon]	257.465	292.072	249.609	606.939	604.609	591.963	0.443106	-1.17428	down
ko00020	Citrate cycle (TCA cycle)	0.00177144	MSTRG.16911	HHC018234	K00382	EC:1.8.1.4	dihydrolipoyl dehydrogenase 2, chloroplastic-like [Asparagus officinalis]	111.592	107.271	130.19	295.695	293.665	296.54	0.394009	-1.3437	down
ko00020	Citrate cycle (TCA cycle)	0.00177144	MSTRG.17231	HHC018664	K01647	EC:2.3.3.1	citrate synthase 4, mitochondrial-like [Asparagus officinalis]	3.72962	2.6496	2.56515	13.7382	14.7955	13.6524	0.212022	-2.23771	down
ko00020	Citrate cycle (TCA cycle)	0.00177144	MSTRG.17700	HHC019364	K00658	EC:2.3.1.61	dihydrolipoyllysine-residue succinyltransferase component of 2-oxoglutarate dehydrogenase complex 1, mitochondrial-like [Asparagus officinalis]	25.2903	22.7442	16.8976	54.3779	50.928	48.7158	0.421578	-1.24613	down
ko00020	Citrate cycle (TCA cycle)	0.00177144	MSTRG.17881	HHC019694	K01681	EC:4.2.1.3	PREDICTED: aconitate hydratase, cytoplasmic [Elaeis guineensis];PREDICTED: aconitate hydratase, cytoplasmic-like [Elaeis guineensis];Aconitase A/isopropylmalate dehydratase small subunit [Macleaya cordata]	70.9852	90.282	74.3993	311.841	314.368	308.741	0.252063	-1.98814	down
ko00020	Citrate cycle (TCA cycle)	0.00177144	MSTRG.18982	HHC021330	K00161	EC:1.2.4.1	pyruvate dehydrogenase E1 component subunit alpha-3, chloroplastic [Brachypodium distachyon]	6.54076	6.85968	5.8488	17.426	17.3435	18.2301	0.363196	-1.46118	down
ko00020	Citrate cycle (TCA cycle)	0.00177144	MSTRG.19965	HHC022700	K00382	EC:1.8.1.4	dihydrolipoyl dehydrogenase 2, chloroplastic-like [Asparagus officinalis]	17.5171	15.6657	15.0271	67.8725	65.9476	66.0568	0.241198	-2.05171	down
ko00020	Citrate cycle (TCA cycle)	0.00177144	MSTRG.20258	HHC023099	K01648	EC:2.3.3.8	unnamed protein product [Coffea canephora]	83.9502	55.7101	51.2787	218.761	226.606	219.242	0.287296	-1.79939	down
ko00020	Citrate cycle (TCA cycle)	0.00177144	MSTRG.21063	HHC024344	K01681	EC:4.2.1.3	PREDICTED: aconitate hydratase, cytoplasmic [Elaeis guineensis]	396.59	508.777	419.942	988.808	1003.31	998.884	0.443099	-1.1743	down
ko00020	Citrate cycle (TCA cycle)	0.00177144	MSTRG.23440	HHC028161	K00031	EC:1.1.1.42	isocitrate dehydrogenase [NADP]-like [Asparagus officinalis]	25.7911	34.1379	28.8258	98.708	84.387	94.7091	0.319487	-1.64617	down
ko00020	Citrate cycle (TCA cycle)	0.00177144	MSTRG.24182	HHC029168	K00030	EC:1.1.1.41	isocitrate dehydrogenase [NAD] catalytic subunit 5, mitochondrial-like [Asparagus officinalis]	4.97984	4.70974	3.62279	13.4966	15.2404	13.8772	0.312393	-1.67857	down
ko00020	Citrate cycle (TCA cycle)	0.00177144	MSTRG.24596	HHC029684	K00026	EC:1.1.1.37	malate dehydrogenase, mitochondrial [Asparagus officinalis]	115.262	127.91	93.5613	382.664	431.672	378.296	0.282345	-1.82447	down
ko00020	Citrate cycle (TCA cycle)	0.00177144	MSTRG.24870	HHC030089	K01681	EC:4.2.1.3	vesicle-associated protein 4-2-like [Asparagus officinalis]	76.5794	60.4692	72.4473	154.241	152.24	145.167	0.463847	-1.10828	down
ko00020	Citrate cycle (TCA cycle)	0.00177144	MSTRG.26576	HHC032916	K01899	EC:6.2.1.4;EC:6.2.1.5	LOW QUALITY PROTEIN: succinate--CoA ligase [ADP-forming] subunit alpha-1, mitochondrial-like [Asparagus officinalis]	37.5902	35.9671	29.2446	77.7416	81.1525	80.0159	0.430295	-1.2166	down
ko00020	Citrate cycle (TCA cycle)	0.00177144	MSTRG.27388	HHC034308	K00382	EC:1.8.1.4	dihydrolipoyl dehydrogenase, mitochondrial isoform X1 [Asparagus officinalis]	27.9288	36.7173	26.2656	65.9849	64.7982	66.1005	0.461753	-1.11481	down
ko00020	Citrate cycle (TCA cycle)	0.00177144	MSTRG.27427	HHC034372	K01648	EC:2.3.3.8	ATP-citrate synthase beta chain protein 1 [Asparagus officinalis]	206.066	167.085	122.745	446.375	574.612	455.175	0.335936	-1.57374	down
ko00020	Citrate cycle (TCA cycle)	0.00177144	MSTRG.27657	HHC034719	K00161	EC:1.2.4.1	pyruvate dehydrogenase E1 component subunit alpha-1, mitochondrial-like [Asparagus officinalis]	11.4302	15.4722	41.2147	1.43449	1.5519	2.08084	13.4427	3.74875	up
ko00020	Citrate cycle (TCA cycle)	0.00177144	MSTRG.28494	HHC035906	K00025	EC:1.1.1.37	malate dehydrogenase [Asparagus officinalis]	198.368	219.78	149.225	439.027	454.807	440.393	0.425244	-1.23364	down
ko00020	Citrate cycle (TCA cycle)	0.00177144	MSTRG.29849	HHC037875	K01899	EC:6.2.1.4;EC:6.2.1.5	Succinyl-CoA ligase [ADP-forming] subunit alpha-1, mitochondrial [Gossypium arboreum]	79.5242	74.5528	72.4632	167.594	165.708	169.191	0.450833	-1.14933	down
ko00020	Citrate cycle (TCA cycle)	0.00177144	MSTRG.30641	HHC039101	K00627	EC:2.3.1.12	dihydrolipoyllysine-residue acetyltransferase component 2 of pyruvate dehydrogenase complex, mitochondrial-like [Phoenix dactylifera]	214.887	229.246	220.733	705.769	679.124	693.091	0.319957	-1.64405	down
ko00020	Citrate cycle (TCA cycle)	0.00177144	MSTRG.31350	HHC040039	K00627	EC:2.3.1.12	dihydrolipoyllysine-residue acetyltransferase component 4 of pyruvate dehydrogenase complex, chloroplastic [Sesamum indicum]	34.3604	34.6341	37.4401	132.197	131.919	127.829	0.271555	-1.88068	down
ko00020	Citrate cycle (TCA cycle)	0.00177144	MSTRG.31526	HHC040261	K01681	EC:4.2.1.3	hypothetical protein B296_00003393 [Ensete ventricosum];uncharacterized protein A4U43_C06F2740 [Asparagus officinalis]	103.424	107.016	167.791	47.0239	44.2899	46.6074	2.74236	1.45542	up
ko00020	Citrate cycle (TCA cycle)	0.00177144	MSTRG.32133	HHC048768	K00627	EC:2.3.1.12	hypothetical protein CARUB_v10008900mg, partial [Capsella rubella]	15.8304	12.7651	12.5043	44.8952	45.5356	44.0764	0.305559	-1.71048	down
ko00020	Citrate cycle (TCA cycle)	0.00177144	MSTRG.3234	HHC004643	K01648	EC:2.3.3.8	unnamed protein product [Coffea canephora];PREDICTED: ATP-citrate synthase alpha chain protein 3 [Elaeis guineensis];ATP-citrate synthase alpha chain protein 2 [Coffea arabica]	49.4886	30.702	27.0845	139.855	136.428	138.979	0.258331	-1.95271	down
ko00020	Citrate cycle (TCA cycle)	0.00177144	MSTRG.32685	HHC049579	K01681	EC:4.2.1.3	vesicle-associated protein 4-2 isoform X2 [Manihot esculenta]	28.3306	20.7706	18.7719	45.7201	41.8387	50.7913	0.490589	-1.02741	down
[truncated: 4,330 more rows]
