# Supplementary material for: Integration of mRNA and miRNA Analysis Reveals the Post-Transcriptional Regulation of Salt Stress Response in Hemerocallis fulva
Source: Int J Mol Sci. 2023 Apr 14;24(8):7290. doi: 10.3390/ijms24087290 (PMC10139057; doi:10.3390/ijms24087290)
Supplement: Supplementary file 1 [file ijms-24-07290-s001.zip › Table S11.xlsx]

## Sheet: Sheet1
Table S11 The miRNA-mRNA targets pair identified in H. fulva through degradome sequencing
SiteID	Query	Transcript	GnenID	Symbol	Description	GO	KEGG	TStart	TStop	TSlice	MFEratio	AllenScore	Structure	Sequence	DegradomeRawReads	DegradomeNormReads	DegradomeCategory	DegradomePval	Tplot_file_path
rna-HHC011544.1:3025	PC-5p-40066_69	rna-HHC011544.1	MSTRG.12144	HHC011545;HHC011547;HHC011544;HHC011549	ABC transporter C family member 3-like isoform X2 [Phoenix dactylifera];ABC transporter C family member 3-like isoform X1 [Phoenix dactylifera];LOW QUALITY PROTEIN: ABC transporter C family member 3-like [Asparagus officinalis];PREDICTED: ABC transporter C family member 3-like [Elaeis guineensis]	GO:0000325(plant-type vacuole);GO:0005524(ATP binding);GO:0005773(vacuole);GO:0005774(vacuolar membrane);GO:0005886(plasma membrane);GO:0008559(xenobiotic transmembrane transporting ATPase activity);GO:0009506(plasmodesma);GO:0010290(chlorophyll catabolite transmembrane transporter activity);GO:0015431(glutathione S-conjugate-exporting ATPase activity);GO:0016021(integral component of membrane);G…	ko02010(ABC transporters)	3014	3034	3025	0.742138	6	(((((((((((((.(.(((((&))))).).)))))))))))))	GACUUCAUGAUUUAAGGUCCA&UGGAUGUAAAAUCAUGAGGUU	4	117.038	0	0.00361592	Output/hfu/cleaveLand_result/t_plot/PC-5p-40066_69_rna-HHC011544.1_3025_TPlot.pdf
rna-HHC030192.1:400	ath-miR828_2ss11AG17AG	rna-HHC030192.1	MSTRG.24949	HHC030192	AN2 [Muscari armeniacum]	GO:0000981(RNA polymerase II transcription factor activity, sequence-specific DNA binding);GO:0001135(transcription factor activity, RNA polymerase II transcription factor recruiting);GO:0003677(DNA binding);GO:0003700(DNA binding transcription factor activity);GO:0005515(protein binding);GO:0005634(nucleus);GO:0006351(transcription, DNA-templated);GO:0006355(regulation of transcription, DNA-temp…	NA	388	409	400	0.867925	2.5	(((((((((((((((((((((.&.)))))))))))))))))))))	UGGAAUACUCAUUUAAGCAAGC&UCUUGCUUAAGUGAGUGUUCCA	85	2487.05	0	0.000402416	Output/hfu/cleaveLand_result/t_plot/ath-miR828_2ss11AG17AG_rna-HHC030192.1_400_TPlot.pdf
rna-HHC005249.1:49	osa-MIR5079a-p3_2ss4GT17TC	rna-HHC005249.1	MSTRG.3539	HHC005249	annexin-like protein RJ4 [Asparagus officinalis]	GO:0005509(calcium ion binding);GO:0005544(calcium-dependent phospholipid binding);GO:0005634(nucleus);GO:0009408(response to heat);GO:0009409(response to cold);GO:0009414(response to water deprivation);GO:0009651(response to salt stress)	NA	39	59	49	0.719298	6.5	(((((((((((((.(((((..&..)))))-)))))))))))))	UGAGUUUUUGAGAGAUCAUGG&AAAUGGU-UCUCAAAAACUCG	6	175.557	0	0.0207123	Output/hfu/cleaveLand_result/t_plot/osa-MIR5079a-p3_2ss4GT17TC_rna-HHC005249.1_49_TPlot.pdf
rna-HHC015774.1:341	aof-miR395a_1ss21TA	rna-HHC015774.1	MSTRG.15026	HHC015774	ATP-sulfurylase [Allium cepa]	GO:0005515(protein binding)	ko00920(Sulfur metabolism);ko00230(Purine metabolism);ko00450(Selenocompound metabolism);ko00261(Monobactam biosynthesis)	330	350	341	0.934383	1.5	.((((((((((((((((((((&)))))))))))))))))))).	CGAGUUCCUCCAAACACUUCA&UGAAGUGUUUGGGGGAACUCA	18	526.67	0	0.00281352	Output/hfu/cleaveLand_result/t_plot/aof-miR395a_1ss21TA_rna-HHC015774.1_341_TPlot.pdf
MSTRG.15026.1:357	aof-miR395a_1ss21TA	MSTRG.15026.1	MSTRG.15026	HHC015774	ATP-sulfurylase [Allium cepa]	GO:0005515(protein binding)	ko00920(Sulfur metabolism);ko00230(Purine metabolism);ko00450(Selenocompound metabolism);ko00261(Monobactam biosynthesis)	346	366	357	0.934383	1.5	.((((((((((((((((((((&)))))))))))))))))))).	CGAGUUCCUCCAAACACUUCA&UGAAGUGUUUGGGGGAACUCA	13	380.373	0	0.00201046	Output/hfu/cleaveLand_result/t_plot/aof-miR395a_1ss21TA_MSTRG.15026.1_357_TPlot.pdf
rna-HHC035661.1:2562	aof-miR167a	rna-HHC035661.1	MSTRG.28328	HHC035661	auxin response factor 12-like isoform X1 [Phoenix dactylifera]	GO:0003700(DNA binding transcription factor activity);GO:0005515(protein binding);GO:0005634(nucleus);GO:0006351(transcription, DNA-templated);GO:0006355(regulation of transcription, DNA-templated);GO:0009733(response to auxin);GO:0009734(auxin-activated signaling pathway);GO:0009908(flower development);GO:0043565(sequence-specific DNA binding)	ko04075(Plant hormone signal transduction)	2551	2571	2562	0.794344	5	.((((((.(((((((((((..&..))))))))))).)))))).	AAGAUCAGGCUGGCAGCUUGU&UGAAGCUGCCAGCAUGAUCUA	29	848.524	0	0.0032148	Output/hfu/cleaveLand_result/t_plot/aof-miR167a_rna-HHC035661.1_2562_TPlot.pdf
rna-HHC043031.1:2543	aof-miR167a	rna-HHC043031.1	MSTRG.5839	HHC043031	auxin response factor 12-like isoform X1 [Phoenix dactylifera]	GO:0003700(DNA binding transcription factor activity);GO:0005515(protein binding);GO:0005634(nucleus);GO:0006351(transcription, DNA-templated);GO:0006355(regulation of transcription, DNA-templated);GO:0009733(response to auxin);GO:0009734(auxin-activated signaling pathway);GO:0009908(flower development);GO:0043565(sequence-specific DNA binding)	ko04075(Plant hormone signal transduction)	2532	2552	2543	0.794344	5	.((((((.(((((((((((..&..))))))))))).)))))).	AAGAUCAGGCUGGCAGCUUGU&UGAAGCUGCCAGCAUGAUCUA	13	380.373	0	0.00281352	Output/hfu/cleaveLand_result/t_plot/aof-miR167a_rna-HHC043031.1_2543_TPlot.pdf
rna-HHC048333.1:2541	aof-miR167a	rna-HHC048333.1	MSTRG.35658	HHC048333	auxin response factor 12-like isoform X1 [Phoenix dactylifera]	GO:0003700(DNA binding transcription factor activity);GO:0005515(protein binding);GO:0005634(nucleus);GO:0006351(transcription, DNA-templated);GO:0006355(regulation of transcription, DNA-templated);GO:0009733(response to auxin);GO:0009734(auxin-activated signaling pathway);GO:0009908(flower development);GO:0043565(sequence-specific DNA binding)	ko04075(Plant hormone signal transduction)	2530	2550	2541	0.794344	5	.((((((.(((((((((((..&..))))))))))).)))))).	AAGAUCAGGCUGGCAGCUUGU&UGAAGCUGCCAGCAUGAUCUA	10	292.594	0	0.00361592	Output/hfu/cleaveLand_result/t_plot/aof-miR167a_rna-HHC048333.1_2541_TPlot.pdf
rna-HHC036096.1:2197	aof-miR167a	rna-HHC036096.1	MSTRG.28637	HHC036096	auxin response factor 12-like isoform X1 [Phoenix dactylifera]	GO:0003700(DNA binding transcription factor activity);GO:0005515(protein binding);GO:0005634(nucleus);GO:0006351(transcription, DNA-templated);GO:0006355(regulation of transcription, DNA-templated);GO:0009733(response to auxin);GO:0009734(auxin-activated signaling pathway);GO:0009908(flower development);GO:0043565(sequence-specific DNA binding)	ko04075(Plant hormone signal transduction)	2186	2206	2197	0.820051	4	(((((((.(((((((((((..&..))))))))))).)))))))	UAGAUCAGGCUGGCAGCUUGU&UGAAGCUGCCAGCAUGAUCUA	5	146.297	0	0.000402416	Output/hfu/cleaveLand_result/t_plot/aof-miR167a_rna-HHC036096.1_2197_TPlot.pdf
rna-HHC045314.1:3301	aof-miR167a	rna-HHC045314.1	MSTRG.7532	HHC045314	auxin response factor 17 isoform X1 [Asparagus officinalis];auxin response factor 17-like isoform X1 [Asparagus officinalis]	GO:0003677(DNA binding);GO:0003700(DNA binding transcription factor activity);GO:0005515(protein binding);GO:0005634(nucleus);GO:0006351(transcription, DNA-templated);GO:0006355(regulation of transcription, DNA-templated);GO:0009733(response to auxin);GO:0009734(auxin-activated signaling pathway);GO:0009908(flower development)	ko04075(Plant hormone signal transduction)	3290	3310	3301	0.796915	5	.((((((.(((((((((((..&..))))))))))).)))))).	GAGAUCAGGCUGGCAGCUUGU&UGAAGCUGCCAGCAUGAUCUA	24	702.227	0	0.00160869	Output/hfu/cleaveLand_result/t_plot/aof-miR167a_rna-HHC045314.1_3301_TPlot.pdf
rna-HHC045314.2:3291	aof-miR167a	rna-HHC045314.2	MSTRG.7532	HHC045314	auxin response factor 17 isoform X1 [Asparagus officinalis];auxin response factor 17-like isoform X1 [Asparagus officinalis]	GO:0003677(DNA binding);GO:0003700(DNA binding transcription factor activity);GO:0005515(protein binding);GO:0005634(nucleus);GO:0006351(transcription, DNA-templated);GO:0006355(regulation of transcription, DNA-templated);GO:0009733(response to auxin);GO:0009734(auxin-activated signaling pathway);GO:0009908(flower development)	ko04075(Plant hormone signal transduction)	3280	3300	3291	0.796915	5	.((((((.(((((((((((..&..))))))))))).)))))).	GAGAUCAGGCUGGCAGCUUGU&UGAAGCUGCCAGCAUGAUCUA	19	555.929	0	0.00120676	Output/hfu/cleaveLand_result/t_plot/aof-miR167a_rna-HHC045314.2_3291_TPlot.pdf
rna-HHC027117.1:3349	aof-miR167a	rna-HHC027117.1	MSTRG.22718	HHC027117	auxin response factor 17-like isoform X1 [Asparagus officinalis]	GO:0003677(DNA binding);GO:0003700(DNA binding transcription factor activity);GO:0005515(protein binding);GO:0005634(nucleus);GO:0006351(transcription, DNA-templated);GO:0006355(regulation of transcription, DNA-templated);GO:0009733(response to auxin);GO:0009734(auxin-activated signaling pathway);GO:0009908(flower development)	ko04075(Plant hormone signal transduction)	3338	3358	3349	0.796915	5	.((((((.(((((((((((..&..))))))))))).)))))).	GAGAUCAGGCUGGCAGCUUGU&UGAAGCUGCCAGCAUGAUCUA	34	994.821	0	0.00241207	Output/hfu/cleaveLand_result/t_plot/aof-miR167a_rna-HHC027117.1_3349_TPlot.pdf
rna-HHC045315.1:3305	aof-miR167a	rna-HHC045315.1	MSTRG.7533	HHC045315	auxin response factor 17-like isoform X1 [Asparagus officinalis]	GO:0003677(DNA binding);GO:0003700(DNA binding transcription factor activity);GO:0005515(protein binding);GO:0005634(nucleus);GO:0006351(transcription, DNA-templated);GO:0006355(regulation of transcription, DNA-templated);GO:0009733(response to auxin);GO:0009734(auxin-activated signaling pathway);GO:0009908(flower development)	ko04075(Plant hormone signal transduction)	3294	3314	3305	0.796915	5	.((((((.(((((((((((..&..))))))))))).)))))).	GAGAUCAGGCUGGCAGCUUGU&UGAAGCUGCCAGCAUGAUCUA	7	204.816	0	0.00201046	Output/hfu/cleaveLand_result/t_plot/aof-miR167a_rna-HHC045315.1_3305_TPlot.pdf
rna-HHC035929.1:2024	aof-miR160b_1ss12CT	rna-HHC035929.1	MSTRG.28508	HHC035929	auxin response factor 18-like isoform X1 [Asparagus officinalis]	GO:0003677(DNA binding);GO:0003700(DNA binding transcription factor activity);GO:0005634(nucleus);GO:0006351(transcription, DNA-templated);GO:0006355(regulation of transcription, DNA-templated);GO:0007389(pattern specification process);GO:0009734(auxin-activated signaling pathway);GO:0009738(abscisic acid-activated signaling pathway);GO:0009743(response to carbohydrate);GO:0010154(fruit developme…	ko04075(Plant hormone signal transduction)	2013	2033	2024	1	3	.((((((((((((((((((((&)))))))))))))))))))).	AGGCAUACAGGGAGCCAGGCA&UGCCUGGUUCCUUGUAUGCCA	59	1726.31	0	0.000402416	Output/hfu/cleaveLand_result/t_plot/aof-miR160b_1ss12CT_rna-HHC035929.1_2024_TPlot.pdf
MSTRG.28508.1:2042	aof-miR160b_1ss12CT	MSTRG.28508.1	MSTRG.28508	HHC035929	auxin response factor 18-like isoform X1 [Asparagus officinalis]	GO:0003677(DNA binding);GO:0003700(DNA binding transcription factor activity);GO:0005634(nucleus);GO:0006351(transcription, DNA-templated);GO:0006355(regulation of transcription, DNA-templated);GO:0007389(pattern specification process);GO:0009734(auxin-activated signaling pathway);GO:0009738(abscisic acid-activated signaling pathway);GO:0009743(response to carbohydrate);GO:0010154(fruit developme…	ko04075(Plant hormone signal transduction)	2031	2051	2042	1	3	.((((((((((((((((((((&)))))))))))))))))))).	AGGCAUACAGGGAGCCAGGCA&UGCCUGGUUCCUUGUAUGCCA	40	1170.38	0	0.000804671	Output/hfu/cleaveLand_result/t_plot/aof-miR160b_1ss12CT_MSTRG.28508.1_2042_TPlot.pdf
rna-HHC005115.2:1566	aof-miR160b_1ss12CT	rna-HHC005115.2	MSTRG.3462	HHC005115	auxin response factor 18-like isoform X1 [Asparagus officinalis]	GO:0003677(DNA binding);GO:0003700(DNA binding transcription factor activity);GO:0005634(nucleus);GO:0006351(transcription, DNA-templated);GO:0006355(regulation of transcription, DNA-templated);GO:0007389(pattern specification process);GO:0009734(auxin-activated signaling pathway);GO:0009738(abscisic acid-activated signaling pathway);GO:0009743(response to carbohydrate);GO:0010154(fruit developme…	ko04075(Plant hormone signal transduction)	1555	1575	1566	0.91133	4	..(((((((((((((((((((&)))))))))))))))))))..	AAGCAUACAGGGAGCCAGGCA&UGCCUGGUUCCUUGUAUGCCA	20	585.189	0	0.00441768	Output/hfu/cleaveLand_result/t_plot/aof-miR160b_1ss12CT_rna-HHC005115.2_1566_TPlot.pdf
MSTRG.3462.3:244	aof-miR160b_1ss12CT	MSTRG.3462.3	MSTRG.3462	HHC005115	auxin response factor 18-like isoform X1 [Asparagus officinalis]	GO:0003677(DNA binding);GO:0003700(DNA binding transcription factor activity);GO:0005634(nucleus);GO:0006351(transcription, DNA-templated);GO:0006355(regulation of transcription, DNA-templated);GO:0007389(pattern specification process);GO:0009734(auxin-activated signaling pathway);GO:0009738(abscisic acid-activated signaling pathway);GO:0009743(response to carbohydrate);GO:0010154(fruit developme…	ko04075(Plant hormone signal transduction)	233	253	244	0.91133	4	..(((((((((((((((((((&)))))))))))))))))))..	AAGCAUACAGGGAGCCAGGCA&UGCCUGGUUCCUUGUAUGCCA	13	380.373	0	0.00561912	Output/hfu/cleaveLand_result/t_plot/aof-miR160b_1ss12CT_MSTRG.3462.3_244_TPlot.pdf
rna-HHC047715.1:1544	aof-miR160b_1ss12CT	rna-HHC047715.1	MSTRG.32504	HHC047715	auxin response factor 18-like isoform X1 [Asparagus officinalis]	GO:0003677(DNA binding);GO:0003700(DNA binding transcription factor activity);GO:0005634(nucleus);GO:0006351(transcription, DNA-templated);GO:0006355(regulation of transcription, DNA-templated);GO:0007389(pattern specification process);GO:0009734(auxin-activated signaling pathway);GO:0009738(abscisic acid-activated signaling pathway);GO:0009743(response to carbohydrate);GO:0010154(fruit developme…	ko04075(Plant hormone signal transduction)	1533	1553	1544	0.91133	4	..(((((((((((((((((((&)))))))))))))))))))..	AAGCAUACAGGGAGCCAGGCA&UGCCUGGUUCCUUGUAUGCCA	9	263.335	0	0.00361592	Output/hfu/cleaveLand_result/t_plot/aof-miR160b_1ss12CT_rna-HHC047715.1_1544_TPlot.pdf
MSTRG.9395.1:1316	aof-miR160c	MSTRG.9395.1	MSTRG.9395	HHC007179	auxin response factor 18-like isoform X1 [Asparagus officinalis]	GO:0003677(DNA binding);GO:0003700(DNA binding transcription factor activity);GO:0005634(nucleus);GO:0006351(transcription, DNA-templated);GO:0006355(regulation of transcription, DNA-templated);GO:0007389(pattern specification process);GO:0009734(auxin-activated signaling pathway);GO:0009738(abscisic acid-activated signaling pathway);GO:0009743(response to carbohydrate);GO:0010154(fruit developme…	ko04075(Plant hormone signal transduction)	1305	1325	1316	0.927313	2	..(((((((((((((((((((&)))))))))))))))))))..	AAGCAUACAGGGAGCCAGGCA&UGCCUGGCUCCCUGUAUGCCA	49	1433.71	0	0.00401688	Output/hfu/cleaveLand_result/t_plot/aof-miR160c_MSTRG.9395.1_1316_TPlot.pdf
rna-HHC007179.1:1316	aof-miR160c	rna-HHC007179.1	MSTRG.9395	HHC007179	auxin response factor 18-like isoform X1 [Asparagus officinalis]	GO:0003677(DNA binding);GO:0003700(DNA binding transcription factor activity);GO:0005634(nucleus);GO:0006351(transcription, DNA-templated);GO:0006355(regulation of transcription, DNA-templated);GO:0007389(pattern specification process);GO:0009734(auxin-activated signaling pathway);GO:0009738(abscisic acid-activated signaling pathway);GO:0009743(response to carbohydrate);GO:0010154(fruit developme…	ko04075(Plant hormone signal transduction)	1305	1325	1316	0.927313	2	..(((((((((((((((((((&)))))))))))))))))))..	AAGCAUACAGGGAGCCAGGCA&UGCCUGGCUCCCUGUAUGCCA	48	1404.45	0	0.00481832	Output/hfu/cleaveLand_result/t_plot/aof-miR160c_rna-HHC007179.1_1316_TPlot.pdf
rna-HHC005115.1:1620	aof-miR160c	rna-HHC005115.1	MSTRG.3462	HHC005115	auxin response factor 18-like isoform X1 [Asparagus officinalis]	GO:0003677(DNA binding);GO:0003700(DNA binding transcription factor activity);GO:0005634(nucleus);GO:0006351(transcription, DNA-templated);GO:0006355(regulation of transcription, DNA-templated);GO:0007389(pattern specification process);GO:0009734(auxin-activated signaling pathway);GO:0009738(abscisic acid-activated signaling pathway);GO:0009743(response to carbohydrate);GO:0010154(fruit developme…	ko04075(Plant hormone signal transduction)	1609	1629	1620	0.927313	2	..(((((((((((((((((((&)))))))))))))))))))..	AAGCAUACAGGGAGCCAGGCA&UGCCUGGCUCCCUGUAUGCCA	20	585.189	0	0.0032148	Output/hfu/cleaveLand_result/t_plot/aof-miR160c_rna-HHC005115.1_1620_TPlot.pdf
MSTRG.32504.1:1544	aof-miR160c	MSTRG.32504.1	MSTRG.32504	HHC047715	auxin response factor 18-like isoform X1 [Asparagus officinalis]	GO:0003677(DNA binding);GO:0003700(DNA binding transcription factor activity);GO:0005634(nucleus);GO:0006351(transcription, DNA-templated);GO:0006355(regulation of transcription, DNA-templated);GO:0007389(pattern specification process);GO:0009734(auxin-activated signaling pathway);GO:0009738(abscisic acid-activated signaling pathway);GO:0009743(response to carbohydrate);GO:0010154(fruit developme…	ko04075(Plant hormone signal transduction)	1533	1553	1544	0.927313	2	..(((((((((((((((((((&)))))))))))))))))))..	AAGCAUACAGGGAGCCAGGCA&UGCCUGGCUCCCUGUAUGCCA	10	292.594	0	0.0052188	Output/hfu/cleaveLand_result/t_plot/aof-miR160c_MSTRG.32504.1_1544_TPlot.pdf
rna-HHC012737.1:82	aof-miR408_R+1	rna-HHC012737.1	MSTRG.12889	HHC012737	basic blue protein [Asparagus officinalis]	GO:0046658(anchored component of plasma membrane)	NA	69	91	82	0.85	3.5	.(((..(((((((((((((((((&)))))))))))))))))-.))).	UGGCAAAGGGAAGAGGCAGUGCA&UGCACUGCCUCUUCCCU-GGCUU	31	907.043	0	0.00160869	Output/hfu/cleaveLand_result/t_plot/aof-miR408_R+1_rna-HHC012737.1_82_TPlot.pdf
rna-HHC027131.1:832	aof-miR166a_L-2R+2_1ss19TC	rna-HHC027131.1	MSTRG.22729	HHC027131	class III homeobox-leucine zipper protein [Asparagus asparagoides]	GO:0003677(DNA binding);GO:0003700(DNA binding transcription factor activity);GO:0005634(nucleus);GO:0006351(transcription, DNA-templated);GO:0006355(regulation of transcription, DNA-templated);GO:0008289(lipid binding);GO:0009855(determination of bilateral symmetry);GO:0009944(polarity specification of adaxial/abaxial axis);GO:0009955(adaxial/abaxial pattern specification);GO:0010014(meristem in…	NA	819	841	832	0.877419	3	((..((((((((((((((((((.&.))))))))))))))))))--))	GGUUGGGAUGAAGCCUGGUCCGG&UCGGACCAGGCUUCAUCCC--CC	10	292.594	0	0.000402416	Output/hfu/cleaveLand_result/t_plot/aof-miR166a_L-2R+2_1ss19TC_rna-HHC027131.1_832_TPlot.pdf
rna-HHC021176.1:59	aof-miR398_1ss21GT	rna-HHC021176.1	MSTRG.18881	HHC021176	copper chaperone for superoxide dismutase, chloroplastic [Asparagus officinalis]	GO:0004784(superoxide dismutase activity);GO:0005507(copper ion binding);GO:0005737(cytoplasm);GO:0008270(zinc ion binding);GO:0019430(removal of superoxide radicals)	NA	48	68	59	0.719715	7	...(((((((((.(((((((.&.))))))).)))))))))...	CUUGGGCGACCUUGGAACACU&UGUGUUCUCAGGUCGCCCCUU	16	468.151	0	0.016367	Output/hfu/cleaveLand_result/t_plot/aof-miR398_1ss21GT_rna-HHC021176.1_59_TPlot.pdf
rna-HHC021167.1:503	aof-miR398_1ss21GT	rna-HHC021167.1	MSTRG.18866	HHC021167	copper chaperone for superoxide dismutase, chloroplastic [Asparagus officinalis]	GO:0004784(superoxide dismutase activity);GO:0005507(copper ion binding);GO:0005737(cytoplasm);GO:0008270(zinc ion binding);GO:0019430(removal of superoxide radicals)	ko04146(Peroxisome)	492	512	503	0.719715	7	...(((((((((.(((((((.&.))))))).)))))))))...	UUUGGGCGACCUUGGAACACU&UGUGUUCUCAGGUCGCCCCUU	15	438.892	0	0.0155748	Output/hfu/cleaveLand_result/t_plot/aof-miR398_1ss21GT_rna-HHC021167.1_503_TPlot.pdf
rna-HHC021174.1:26	aof-miR398_1ss21GT	rna-HHC021174.1	MSTRG.18878	HHC021174	copper chaperone for superoxide dismutase, chloroplastic [Asparagus officinalis]	GO:0004784(superoxide dismutase activity);GO:0005507(copper ion binding);GO:0005737(cytoplasm);GO:0008270(zinc ion binding);GO:0019430(removal of superoxide radicals)	NA	15	35	26	0.719715	7	...(((((((((.(((((((.&.))))))).)))))))))...	AUUGGGCGACCUUGGAACACU&UGUGUUCUCAGGUCGCCCCUU	13	380.373	0	0.0143854	Output/hfu/cleaveLand_result/t_plot/aof-miR398_1ss21GT_rna-HHC021174.1_26_TPlot.pdf
rna-HHC021159.1:730	aof-miR398_1ss21GT	rna-HHC021159.1	MSTRG.18858	HHC021159	copper chaperone for superoxide dismutase, chloroplastic [Asparagus officinalis]	GO:0004784(superoxide dismutase activity);GO:0005507(copper ion binding);GO:0005737(cytoplasm);GO:0008270(zinc ion binding);GO:0019430(removal of superoxide radicals)	ko04146(Peroxisome)	719	739	730	0.719715	7	...(((((((((.(((((((.&.))))))).)))))))))...	UUUGGGCGACCUUGGAACACU&UGUGUUCUCAGGUCGCCCCUU	13	380.373	0	0.0147821	Output/hfu/cleaveLand_result/t_plot/aof-miR398_1ss21GT_rna-HHC021159.1_730_TPlot.pdf
rna-HHC016628.2:1374	aof-miR398_1ss21GT	rna-HHC016628.2	MSTRG.15710	HHC016628	copper chaperone for superoxide dismutase, chloroplastic [Asparagus officinalis]	GO:0004784(superoxide dismutase activity);GO:0005507(copper ion binding);GO:0005737(cytoplasm);GO:0008270(zinc ion binding);GO:0019430(removal of superoxide radicals)	ko04146(Peroxisome)	1362	1383	1374	0.741093	6	.((.(((((((((.(((((((.&.))))))).)))))))))-)).	CAGUGGGCGACCUUGGAACACU&UGUGUUCUCAGGUCGCCC-CUU	10	292.594	0	0.0120023	Output/hfu/cleaveLand_result/t_plot/aof-miR398_1ss21GT_rna-HHC016628.2_1374_TPlot.pdf
MSTRG.15710.4:71	aof-miR398_1ss21GT	MSTRG.15710.4	MSTRG.15710	HHC016628	copper chaperone for superoxide dismutase, chloroplastic [Asparagus officinalis]	GO:0004784(superoxide dismutase activity);GO:0005507(copper ion binding);GO:0005737(cytoplasm);GO:0008270(zinc ion binding);GO:0019430(removal of superoxide radicals)	ko04146(Peroxisome)	59	80	71	0.741093	6	.((.(((((((((.(((((((.&.))))))).)))))))))-)).	CAGUGGGCGACCUUGGAACACU&UGUGUUCUCAGGUCGCCC-CUU	6	175.557	0	0.0123999	Output/hfu/cleaveLand_result/t_plot/aof-miR398_1ss21GT_MSTRG.15710.4_71_TPlot.pdf
rna-HHC006853.2:66	aof-miR398_1ss21GT	rna-HHC006853.2	MSTRG.9177	HHC006853	copper/zinc superoxide dismutase, partial [Allium sativum]	GO:0004784(superoxide dismutase activity);GO:0005507(copper ion binding);GO:0005737(cytoplasm);GO:0008270(zinc ion binding);GO:0019430(removal of superoxide radicals)	ko04146(Peroxisome)	55	75	66	0.76247	3.5	(((((((.((((((((.((((&)))).)))))))).)))))))	AAGGGGUCACCUGAGAUCACA&UGUGUUCUCAGGUCGCCCCUU	97	2838.17	0	0.00561912	Output/hfu/cleaveLand_result/t_plot/aof-miR398_1ss21GT_rna-HHC006853.2_66_TPlot.pdf
rna-HHC005458.2:81	aof-miR398_1ss21GT	rna-HHC005458.2	MSTRG.3658	HHC005458	copper/zinc superoxide dismutase, partial [Allium sativum]	GO:0004784(superoxide dismutase activity);GO:0005507(copper ion binding);GO:0005737(cytoplasm);GO:0008270(zinc ion binding);GO:0019430(removal of superoxide radicals)	ko04146(Peroxisome)	70	90	81	0.755344	4	(((((((.((((((((.((((&)))).)))))))).)))))))	AGGGGGUUACCUGAGAUCACA&UGUGUUCUCAGGUCGCCCCUU	82	2399.27	0	0.00881585	Output/hfu/cleaveLand_result/t_plot/aof-miR398_1ss21GT_rna-HHC005458.2_81_TPlot.pdf
MSTRG.16170.1:74	aof-miR398_1ss21GT	MSTRG.16170.1	MSTRG.16170	HHC017210;HHC017214;HHC017213	cucumber peeling cupredoxin-like [Dendrobium catenatum]	GO:0046658(anchored component of plasma membrane)	ko00230(Purine metabolism);ko00240(Pyrimidine metabolism);ko03020(RNA polymerase)	63	84	74	0.75772	4.5	(((((((.(((((.(((((((.&.)))))))-))))).)))))))	AGGGGGCAACCUGUAGAACACC&UGUGUUCU-CAGGUCGCCCCUU	9	263.335	0	0.0068191	Output/hfu/cleaveLand_result/t_plot/aof-miR398_1ss21GT_MSTRG.16170.1_74_TPlot.pdf
rna-HHC017260.1:1393	aof-miR172	rna-HHC017260.1	MSTRG.16215	HHC017260	floral homeotic protein APETALA 2 isoform X1 [Manihot esculenta];AP2-like ethylene-responsive transcription factor TOE3 isoform X3 [Phoenix dactylifera]	GO:0003677(DNA binding);GO:0003700(DNA binding transcription factor activity);GO:0005634(nucleus);GO:0006351(transcription, DNA-templated);GO:0006355(regulation of transcription, DNA-templated);GO:0009908(flower development);GO:0010073(meristem maintenance);GO:0010093(specification of floral organ identity);GO:0019953(sexual reproduction);GO:0030154(cell differentiation);GO:0048316(seed developme…	NA	1382	1402	1393	0.997085	2	.((((((((((((((((((((&)))))))))))))))))))).	CUGCAGCAUCAUCAGGAUUCU&AGAAUCUUGAUGAUGCUGCAU	38	1111.86	0	0.00160869	Output/hfu/cleaveLand_result/t_plot/aof-miR172_rna-HHC017260.1_1393_TPlot.pdf
rna-HHC017260.2:1396	aof-miR172	rna-HHC017260.2	MSTRG.16215	HHC017260	floral homeotic protein APETALA 2 isoform X1 [Manihot esculenta];AP2-like ethylene-responsive transcription factor TOE3 isoform X3 [Phoenix dactylifera]	GO:0003677(DNA binding);GO:0003700(DNA binding transcription factor activity);GO:0005634(nucleus);GO:0006351(transcription, DNA-templated);GO:0006355(regulation of transcription, DNA-templated);GO:0009908(flower development);GO:0010073(meristem maintenance);GO:0010093(specification of floral organ identity);GO:0019953(sexual reproduction);GO:0030154(cell differentiation);GO:0048316(seed developme…	NA	1385	1405	1396	0.997085	2	.((((((((((((((((((((&)))))))))))))))))))).	CUGCAGCAUCAUCAGGAUUCU&AGAAUCUUGAUGAUGCUGCAU	31	907.043	0	0.00281352	Output/hfu/cleaveLand_result/t_plot/aof-miR172_rna-HHC017260.2_1396_TPlot.pdf
MSTRG.16215.3:1277	aof-miR172	MSTRG.16215.3	MSTRG.16215	HHC017260	floral homeotic protein APETALA 2 isoform X1 [Manihot esculenta];AP2-like ethylene-responsive transcription factor TOE3 isoform X3 [Phoenix dactylifera]	GO:0003677(DNA binding);GO:0003700(DNA binding transcription factor activity);GO:0005634(nucleus);GO:0006351(transcription, DNA-templated);GO:0006355(regulation of transcription, DNA-templated);GO:0009908(flower development);GO:0010073(meristem maintenance);GO:0010093(specification of floral organ identity);GO:0019953(sexual reproduction);GO:0030154(cell differentiation);GO:0048316(seed developme…	NA	1266	1286	1277	0.997085	2	.((((((((((((((((((((&)))))))))))))))))))).	CUGCAGCAUCAUCAGGAUUCU&AGAAUCUUGAUGAUGCUGCAU	27	790.005	0	0.000402416	Output/hfu/cleaveLand_result/t_plot/aof-miR172_MSTRG.16215.3_1277_TPlot.pdf
rna-HHC039058.1:749	aof-miR396a	rna-HHC039058.1	MSTRG.30601	HHC039058	growth-regulating factor 4-like [Asparagus officinalis]	GO:0005737(cytoplasm);GO:0008757(S-adenosylmethionine-dependent methyltransferase activity);GO:0032259(methylation)	NA	738	759	749	0.833333	4	..(((((((((((((.((((((&))))))-)))))))))))))..	CCGUUCAAGAAAGCCUGUGGAA&UUCCAC-GGCUUUCUUGAACUG	42	1228.9	0	0.00481832	Output/hfu/cleaveLand_result/t_plot/aof-miR396a_rna-HHC039058.1_749_TPlot.pdf
MSTRG.30601.1:602	aof-miR396a	MSTRG.30601.1	MSTRG.30601	HHC039058	growth-regulating factor 4-like [Asparagus officinalis]	GO:0005737(cytoplasm);GO:0008757(S-adenosylmethionine-dependent methyltransferase activity);GO:0032259(methylation)	NA	591	612	602	0.833333	4	..(((((((((((((.((((((&))))))-)))))))))))))..	CCGUUCAAGAAAGCCUGUGGAA&UUCCAC-GGCUUUCUUGAACUG	42	1228.9	0	0.0052188	Output/hfu/cleaveLand_result/t_plot/aof-miR396a_MSTRG.30601.1_602_TPlot.pdf
rna-HHC045333.1:416	aof-miR166a_L-2R+2_1ss19TC	rna-HHC045333.1	MSTRG.7542	HHC045333	homeobox-leucine zipper protein HOX32-like [Asparagus officinalis]	GO:0003677(DNA binding);GO:0003700(DNA binding transcription factor activity);GO:0005634(nucleus);GO:0006351(transcription, DNA-templated);GO:0006355(regulation of transcription, DNA-templated);GO:0008289(lipid binding);GO:0009855(determination of bilateral symmetry);GO:0009944(polarity specification of adaxial/abaxial axis);GO:0009955(adaxial/abaxial pattern specification);GO:0010014(meristem in…	NA	403	425	416	0.877419	3	((..((((((((((((((((((.&.))))))))))))))))))--))	GGUUGGGAUGAAGCCUGGUCCGG&UCGGACCAGGCUUCAUCCC--CC	9	263.335	0	0.00120676	Output/hfu/cleaveLand_result/t_plot/aof-miR166a_L-2R+2_1ss19TC_rna-HHC045333.1_416_TPlot.pdf
MSTRG.24971.1:573	aof-miR156c	MSTRG.24971.1	MSTRG.24971	HHC030225;HHC030226	hypothetical protein AQUCO_03300055v1 [Aquilegia coerulea];squamosa promoter-binding protein 1 [Asparagus officinalis]	GO:0003677(DNA binding);GO:0003700(DNA binding transcription factor activity);GO:0005634(nucleus);GO:0005737(cytoplasm);GO:0006351(transcription, DNA-templated);GO:0006355(regulation of transcription, DNA-templated);GO:0010321(regulation of vegetative phase change);GO:0046872(metal ion binding)	ko04075(Plant hormone signal transduction)	563	582	573	1	0	((((((((((((((((((((&))))))))))))))))))))	GUGCUCUCUCUCUUCUGUCA&UGACAGAAGAGAGAGAGCAC	5	146.297	0	0.00361592	Output/hfu/cleaveLand_result/t_plot/aof-miR156c_MSTRG.24971.1_573_TPlot.pdf
rna-HHC013471.1:469	bdi-miR528-5p_R+2	rna-HHC013471.1	MSTRG.13332	HHC013471	hypothetical protein B296_00015743 [Ensete ventricosum]	GO:0046658(anchored component of plasma membrane)	NA	457	478	469	0.895372	3.5	.((((((((((-(((((((((((&))))))))))).)))))))))).	GGCUCCUCUGC-UGCCCCUUCCG&UGGAAGGGGCAUGCAGAGGAGCA	104	3042.98	0	0.000402416	Output/hfu/cleaveLand_result/t_plot/bdi-miR528-5p_R+2_rna-HHC013471.1_469_TPlot.pdf
rna-HHC045651.5:871	aof-miR164_2ss20CT21AT	rna-HHC045651.5	MSTRG.7719	HHC045651	hypothetical protein GOBAR_DD31476 [Gossypium barbadense];DNA repair protein recA homolog 1, chloroplastic isoform X1 [Asparagus officinalis];uncharacterized protein A4U43_C07F34890 [Asparagus officinalis]	GO:0000150(recombinase activity);GO:0000400(four-way junction DNA binding);GO:0000730(DNA recombinase assembly);GO:0003690(double-stranded DNA binding);GO:0003697(single-stranded DNA binding);GO:0004520(endodeoxyribonuclease activity);GO:0006312(mitotic recombination);GO:0008094(DNA-dependent ATPase activity);GO:0010212(response to ionizing radiation);GO:0042148(strand invasion);GO:0003677(DNA bi…	ko03440(Homologous recombination)	860	880	871	0.897375	1.5	((((.((((((((((((((((&)))))))))))))))).))))	AGCAAGUGCCCUGCUUCUCCA&UGGAGAAGCAGGGCACGUGUU	4	117.038	0	0.00160869	Output/hfu/cleaveLand_result/t_plot/aof-miR164_2ss20CT21AT_rna-HHC045651.5_871_TPlot.pdf
MSTRG.30181.1:319	osa-MIR444d-p3_2ss14CT17CT	MSTRG.30181.1	MSTRG.30181	HHC038424;HHC038423	hypothetical protein GW17_00048357 [Ensete ventricosum];MADS-box transcription factor 23-like isoform X2 [Asparagus officinalis]	GO:0000977(RNA polymerase II regulatory region sequence-specific DNA binding);GO:0003700(DNA binding transcription factor activity);GO:0005515(protein binding);GO:0005634(nucleus);GO:0006351(transcription, DNA-templated);GO:0006355(regulation of transcription, DNA-templated);GO:0008134(transcription factor binding);GO:0009908(flower development);GO:0010440(stomatal lineage progression);GO:0042803…	NA	308	328	319	1	0.5	(((((((((((((((((((((&)))))))))))))))))))))	GGAGGCAACAAGCUUGAGGCA&UGCCUCAAGCUUGUUGUCUCC	23	672.967	0	0.000402416	Output/hfu/cleaveLand_result/t_plot/osa-MIR444d-p3_2ss14CT17CT_MSTRG.30181.1_319_TPlot.pdf
rna-HHC003440.1:295	aof-miR12143_L-1R-1_1ss2CT	rna-HHC003440.1	MSTRG.2530	HHC003440	hypothetical protein TanjilG_28990 [Lupinus angustifolius]	NA	NA	286	304	295	0.936842	2.5	((((((((((((((((((.&.))))))))))))))))))	GCGGAUCCAACUGCACCUG&UGGGUGCAGUUGGAUCUGC	83	2428.53	0	0.00160869	Output/hfu/cleaveLand_result/t_plot/aof-miR12143_L-1R-1_1ss2CT_rna-HHC003440.1_295_TPlot.pdf
rna-HHC003440.2:1077	PC-5p-1494_1921	rna-HHC003440.2	MSTRG.2530	HHC003440	hypothetical protein TanjilG_28990 [Lupinus angustifolius]	NA	NA	1066	1086	1077	0.881517	3.5	.(((((((((((((((((((.&.))))))))))))))))))).	AUGCGGAUCCAACUGCACCUG&UGGGUGCAGUUGGAUCUGCAG	81	2370.01	0	0.00120676	Output/hfu/cleaveLand_result/t_plot/PC-5p-1494_1921_rna-HHC003440.2_1077_TPlot.pdf
MSTRG.2530.1:293	PC-5p-1494_1921	MSTRG.2530.1	MSTRG.2530	HHC003440	hypothetical protein TanjilG_28990 [Lupinus angustifolius]	NA	NA	282	302	293	0.881517	3.5	.(((((((((((((((((((.&.))))))))))))))))))).	AUGCGGAUCCAACUGCACCUG&UGGGUGCAGUUGGAUCUGCAG	78	2282.24	0	0.000804671	Output/hfu/cleaveLand_result/t_plot/PC-5p-1494_1921_MSTRG.2530.1_293_TPlot.pdf
MSTRG.12157.2:1296	PC-5p-73262_33	MSTRG.12157.2	MSTRG.12157	HHC011565;HHC011570;HHC011562	hypothetical protein VITISV_018069 [Vitis vinifera];LOW QUALITY PROTEIN: probable cellulose synthase A catalytic subunit 1 [UDP-forming] [Dendrobium catenatum];probable cellulose synthase A catalytic subunit 1 [UDP-forming] [Asparagus officinalis];probable cellulose synthase A catalytic subunit 1 [UDP-forming] [Phoenix dactylifera]	GO:0000977(RNA polymerase II regulatory region sequence-specific DNA binding);GO:0005515(protein binding);GO:0005768(endosome);GO:0005794(Golgi apparatus);GO:0005802(trans-Golgi network);GO:0005886(plasma membrane);GO:0009825(multidimensional cell growth);GO:0009832(plant-type cell wall biogenesis);GO:0009833(plant-type primary cell wall biogenesis);GO:0016021(integral component of membrane);GO:0…	NA	1285	1305	1296	0.740984	7	((((((.((((((((((((..&..)))))))))))).))))))	UGUCCUUGUUGUCAACAUGGU&UAUAUGUUGAUAACUGGGAUA	7	204.816	0	0.00921472	Output/hfu/cleaveLand_result/t_plot/PC-5p-73262_33_MSTRG.12157.2_1296_TPlot.pdf
rna-HHC011565.3:2085	PC-5p-73262_33	rna-HHC011565.3	MSTRG.12157	HHC011565;HHC011570;HHC011562	hypothetical protein VITISV_018069 [Vitis vinifera];LOW QUALITY PROTEIN: probable cellulose synthase A catalytic subunit 1 [UDP-forming] [Dendrobium catenatum];probable cellulose synthase A catalytic subunit 1 [UDP-forming] [Asparagus officinalis];probable cellulose synthase A catalytic subunit 1 [UDP-forming] [Phoenix dactylifera]	GO:0000977(RNA polymerase II regulatory region sequence-specific DNA binding);GO:0005515(protein binding);GO:0005768(endosome);GO:0005794(Golgi apparatus);GO:0005802(trans-Golgi network);GO:0005886(plasma membrane);GO:0009825(multidimensional cell growth);GO:0009832(plant-type cell wall biogenesis);GO:0009833(plant-type primary cell wall biogenesis);GO:0016021(integral component of membrane);GO:0…	NA	2074	2094	2085	0.740984	7	((((((.((((((((((((..&..)))))))))))).))))))	UGUCCUUGUUGUCAACAUGGU&UAUAUGUUGAUAACUGGGAUA	4	117.038	0	0.0104104	Output/hfu/cleaveLand_result/t_plot/PC-5p-73262_33_rna-HHC011565.3_2085_TPlot.pdf
rna-HHC027251.1:1193	aof-miR160b_1ss12CT	rna-HHC027251.1	MSTRG.22797	HHC027251	LOW QUALITY PROTEIN: auxin response factor 17-like [Asparagus officinalis]	GO:0000987(proximal promoter sequence-specific DNA binding);GO:0003700(DNA binding transcription factor activity);GO:0005634(nucleus);GO:0006351(transcription, DNA-templated);GO:0006355(regulation of transcription, DNA-templated);GO:0009555(pollen development);GO:0009653(anatomical structure morphogenesis);GO:0009734(auxin-activated signaling pathway);GO:0010208(pollen wall assembly);GO:0048830(a…	ko04075(Plant hormone signal transduction)	1182	1202	1193	1	2.5	(((((((((((((((((((((&)))))))))))))))))))))	UGGCAUGCAGGGAGCCAGGCA&UGCCUGGUUCCUUGUAUGCCA	18	526.67	0	0.00160869	Output/hfu/cleaveLand_result/t_plot/aof-miR160b_1ss12CT_rna-HHC027251.1_1193_TPlot.pdf
MSTRG.22797.1:1193	aof-miR160c	MSTRG.22797.1	MSTRG.22797	HHC027251	LOW QUALITY PROTEIN: auxin response factor 17-like [Asparagus officinalis]	GO:0000987(proximal promoter sequence-specific DNA binding);GO:0003700(DNA binding transcription factor activity);GO:0005634(nucleus);GO:0006351(transcription, DNA-templated);GO:0006355(regulation of transcription, DNA-templated);GO:0009555(pollen development);GO:0009653(anatomical structure morphogenesis);GO:0009734(auxin-activated signaling pathway);GO:0010208(pollen wall assembly);GO:0048830(a…	ko04075(Plant hormone signal transduction)	1182	1202	1193	1	0.5	(((((((((((((((((((((&)))))))))))))))))))))	UGGCAUGCAGGGAGCCAGGCA&UGCCUGGCUCCCUGUAUGCCA	23	672.967	0	0.00241207	Output/hfu/cleaveLand_result/t_plot/aof-miR160c_MSTRG.22797.1_1193_TPlot.pdf
rna-HHC023662.1:643	aof-miR477a_1ss21GA	rna-HHC023662.1	gene-HHC023662	HHC023662	LOW QUALITY PROTEIN: DELLA protein GAI1-like [Asparagus officinalis]	GO:0003700(DNA binding transcription factor activity);GO:0005634(nucleus);GO:0006355(regulation of transcription, DNA-templated);GO:0043565(sequence-specific DNA binding)	ko04075(Plant hormone signal transduction)	632	652	643	0.939675	1.5	((((((((((((((((((((.&.))))))))))))))))))))	UGGAAGCCUUUGAGGGAGAGA&ACUCUCCCUCAAGGGCUUCCA	37	1082.6	0	0.00120676	Output/hfu/cleaveLand_result/t_plot/aof-miR477a_1ss21GA_rna-HHC023662.1_643_TPlot.pdf
rna-HHC051993.1:1124	aof-miR156c	rna-HHC051993.1	gene-HHC051993	HHC051993	LOW QUALITY PROTEIN: uncharacterized protein LOC109823482 [Asparagus officinalis]	GO:0003677(DNA binding);GO:0003700(DNA binding transcription factor activity);GO:0005634(nucleus);GO:0006355(regulation of transcription, DNA-templated);GO:0048653(anther development)	NA	1114	1133	1124	1	0	((((((((((((((((((((&))))))))))))))))))))	GUGCUCUCUCUCUUCUGUCA&UGACAGAAGAGAGAGAGCAC	17	497.411	0	0.00160869	Output/hfu/cleaveLand_result/t_plot/aof-miR156c_rna-HHC051993.1_1124_TPlot.pdf
rna-HHC024947.1:921	cpa-miR156a	rna-HHC024947.1	gene-HHC024947	HHC024947	LOW QUALITY PROTEIN: uncharacterized protein LOC109823482 [Asparagus officinalis]	GO:0003677(DNA binding);GO:0003700(DNA binding transcription factor activity);GO:0005634(nucleus);GO:0006355(regulation of transcription, DNA-templated);GO:0048653(anther development)	NA	911	930	921	0.924731	1	((((((.(((((((((((((&))))))))))))).))))))	GUGCUCUCUCUCUUCUGUCA&UGACAGAAGAGAGUGAGCAC	16	468.151	0	0.00761828	Output/hfu/cleaveLand_result/t_plot/cpa-miR156a_rna-HHC024947.1_921_TPlot.pdf
rna-HHC039860.1:501	stu-MIR6027-p3_2ss2GT18TG_1	rna-HHC039860.1	MSTRG.31213	HHC039860	MADS box protein 5, partial [Agave tequilana]	GO:0003700(DNA binding transcription factor activity);GO:0009742(brassinosteroid mediated signaling pathway)	NA	493	510	501	0.756863	6.5	.(((((((((((((((..&..))))))))))))))).	AGCUCUUUGAGUUUUCCA&UUGAGAAUUCAAAGAGUG	37	1082.6	0	0.0332446	Output/hfu/cleaveLand_result/t_plot/stu-MIR6027-p3_2ss2GT18TG_1_rna-HHC039860.1_501_TPlot.pdf
MSTRG.26217.1:284	osa-MIR444d-p3_2ss14CT17CT	MSTRG.26217.1	MSTRG.26217	HHC032372	MADS-box transcription factor 23-like isoform X3 [Asparagus officinalis]	GO:0000977(RNA polymerase II regulatory region sequence-specific DNA binding);GO:0003700(DNA binding transcription factor activity);GO:0005515(protein binding);GO:0005634(nucleus);GO:0006351(transcription, DNA-templated);GO:0006355(regulation of transcription, DNA-templated);GO:0007275(multicellular organism development);GO:0008134(transcription factor binding);GO:0044212(transcription regulatory…	NA	273	293	284	1	0.5	(((((((((((((((((((((&)))))))))))))))))))))	GGAGGCAACAAGCUUGAGGCA&UGCCUCAAGCUUGUUGUCUCC	5	146.297	0	0.000804671	Output/hfu/cleaveLand_result/t_plot/osa-MIR444d-p3_2ss14CT17CT_MSTRG.26217.1_284_TPlot.pdf
MSTRG.561.1:230	PC-5p-31534_90	MSTRG.561.1	MSTRG.561	HHC000612	Metallothionein 3a [Dracaena cambodiana]	NA	NA	218	239	230	0.694761	5	(.(((((.(((((((((((((.&.))))))))))))).))))).)	AGUGUGGCUCCAACUGCACCUG&UGGGUGCAGUUGGAUCUGCAGU	81	2370.01	0	0.037128	Output/hfu/cleaveLand_result/t_plot/PC-5p-31534_90_MSTRG.561.1_230_TPlot.pdf
rna-HHC000612.1:1303	PC-5p-31534_90	rna-HHC000612.1	MSTRG.561	HHC000612	Metallothionein 3a [Dracaena cambodiana]	NA	NA	1291	1312	1303	0.694761	5	(.(((((.(((((((((((((.&.))))))))))))).))))).)	AGUGUGGCUCCAACUGCACCUG&UGGGUGCAGUUGGAUCUGCAGU	76	2223.72	0	0.0386769	Output/hfu/cleaveLand_result/t_plot/PC-5p-31534_90_rna-HHC000612.1_1303_TPlot.pdf
rna-HHC008722.1:288	aof-miR12143_L-1R-1_1ss2CT	rna-HHC008722.1	MSTRG.10180	HHC008722;HHC008724	metallothionein-like protein, partial [Hyacinthus orientalis];metallothionein-like protein type 2 isoform X2 [Phoenix dactylifera];hypothetical protein TanjilG_28990 [Lupinus angustifolius]	GO:0005507(copper ion binding);GO:0006878(cellular copper ion homeostasis)	NA	279	297	288	0.936842	2.5	((((((((((((((((((.&.))))))))))))))))))	GCGGAUCCAACUGCACCUG&UGGGUGCAGUUGGAUCUGC	239	6993.01	0	0.0032148	Output/hfu/cleaveLand_result/t_plot/aof-miR12143_L-1R-1_1ss2CT_rna-HHC008722.1_288_TPlot.pdf
MSTRG.10180.2:285	aof-miR12143_L-1R-1_1ss2CT	MSTRG.10180.2	MSTRG.10180	HHC008722;HHC008724	metallothionein-like protein, partial [Hyacinthus orientalis];metallothionein-like protein type 2 isoform X2 [Phoenix dactylifera];hypothetical protein TanjilG_28990 [Lupinus angustifolius]	GO:0005507(copper ion binding);GO:0006878(cellular copper ion homeostasis)	NA	276	294	285	0.936842	2.5	((((((((((((((((((.&.))))))))))))))))))	GCGGAUCCAACUGCACCUG&UGGGUGCAGUUGGAUCUGC	194	5676.33	0	0.00361592	Output/hfu/cleaveLand_result/t_plot/aof-miR12143_L-1R-1_1ss2CT_MSTRG.10180.2_285_TPlot.pdf
MSTRG.11192.3:296	gma-MIR5368-p5_1ss13CT	MSTRG.11192.3	MSTRG.11192	HHC010273	NA	NA	NA	288	305	296	1	0	((((((((((((((((((&))))))))))))))))))	UCCUGACACAAGGUUAGA&UCUAACCUUGUGUCAGGA	3	87.7783	0	0.00120676	Output/hfu/cleaveLand_result/t_plot/gma-MIR5368-p5_1ss13CT_MSTRG.11192.3_296_TPlot.pdf
MSTRG.30968.1:914	aof-miR164_2ss1TG20CA	MSTRG.30968.1	MSTRG.30968	HHC039545	NAC domain-containing protein 100-like [Phoenix dactylifera]	GO:0003677(DNA binding);GO:0003700(DNA binding transcription factor activity);GO:0005634(nucleus);GO:0006351(transcription, DNA-templated);GO:0006355(regulation of transcription, DNA-templated);GO:0007275(multicellular organism development)	ko03013(RNA transport);ko03015(mRNA surveillance pathway);ko03018(RNA degradation)	903	923	914	0.792711	3	.(((((((.(((((((((((.&.))))))))))).))))))).	CUCACGUGACCUGCUUCUCCA&GGGAGAAGCAGGGCACGUGAA	61	1784.83	0	0.000804671	Output/hfu/cleaveLand_result/t_plot/aof-miR164_2ss1TG20CA_MSTRG.30968.1_914_TPlot.pdf
rna-HHC039545.1:863	aof-miR164_2ss1TG20CA	rna-HHC039545.1	MSTRG.30968	HHC039545	NAC domain-containing protein 100-like [Phoenix dactylifera]	GO:0003677(DNA binding);GO:0003700(DNA binding transcription factor activity);GO:0005634(nucleus);GO:0006351(transcription, DNA-templated);GO:0006355(regulation of transcription, DNA-templated);GO:0007275(multicellular organism development)	ko03013(RNA transport);ko03015(mRNA surveillance pathway);ko03018(RNA degradation)	852	872	863	0.792711	3	.(((((((.(((((((((((.&.))))))))))).))))))).	CUCACGUGACCUGCUUCUCCA&GGGAGAAGCAGGGCACGUGAA	57	1667.79	0	0.00120676	Output/hfu/cleaveLand_result/t_plot/aof-miR164_2ss1TG20CA_rna-HHC039545.1_863_TPlot.pdf
rna-HHC045820.1:667	aof-miR164_1ss20CT	rna-HHC045820.1	MSTRG.7803	HHC045820	NAC domain-containing protein 21/22-like [Asparagus officinalis]	GO:0003677(DNA binding);GO:0003700(DNA binding transcription factor activity);GO:0005634(nucleus);GO:0006351(transcription, DNA-templated);GO:0006355(regulation of transcription, DNA-templated);GO:0007275(multicellular organism development);GO:0009734(auxin-activated signaling pathway);GO:0010072(primary shoot apical meristem specification);GO:0048527(lateral root development)	NA	656	676	667	0.881797	2.5	.(((.((((((((((((((((&)))))))))))))))).))).	AGCAAGUGCCCUGCUUCUCCA&UGGAGAAGCAGGGCACGUGUA	15	438.892	0	0.000804671	Output/hfu/cleaveLand_result/t_plot/aof-miR164_1ss20CT_rna-HHC045820.1_667_TPlot.pdf
rna-HHC051667.1:961	aof-miR536_1ss15GT	rna-HHC051667.1	MSTRG.35126	HHC051666;HHC051667	PREDICTED: anthocyanidin reductase ((2S)-flavan-3-ol-forming) [Elaeis guineensis];PREDICTED: hydroquinone glucosyltransferase-like [Elaeis guineensis]	GO:0003824(catalytic activity);GO:0005634(nucleus);GO:0045551(cinnamyl-alcohol dehydrogenase activity);GO:0050662(coenzyme binding);GO:0009813(flavonoid biosynthetic process);GO:0043231(intracellular membrane-bounded organelle);GO:0052696(flavonoid glucuronidation);GO:0080043(quercetin 3-O-glucosyltransferase activity);GO:0080044(quercetin 7-O-glucosyltransferase activity)	ko00941(Flavonoid biosynthesis)	950	969	961	0.678571	4	(((.((((((((((((((-((&)).)))))))))))))).)))	GGCCCAAAUAGCGUGGCA-GA&UCGUGCCACGCUGUUUGCGUC	5	146.297	0	0.0375154	Output/hfu/cleaveLand_result/t_plot/aof-miR536_1ss15GT_rna-HHC051667.1_961_TPlot.pdf
rna-HHC040032.1:130	gma-miR408a-3p_L-1R+4	rna-HHC040032.1	MSTRG.31347	HHC040032	PREDICTED: basic blue protein-like [Elaeis guineensis]	GO:0046658(anchored component of plasma membrane)	ko00330(Arginine and proline metabolism);ko00360(Phenylalanine metabolism);ko00380(Tryptophan metabolism)	115	139	130	0.746862	5.5	...(((.((((.(((((((((((((&))))))))))))).))))-)))...	UAUGGCUCAGGUAAGAGGCAGUGCA&UGCACUGCCUCUUCCCUG-GCUUUU	132	3862.25	0	0.00721877	Output/hfu/cleaveLand_result/t_plot/gma-miR408a-3p_L-1R+4_rna-HHC040032.1_130_TPlot.pdf
rna-HHC025423.1:75	gma-miR408a-3p_L-1R+4	rna-HHC025423.1	MSTRG.21779	HHC025423	PREDICTED: basic blue protein-like [Elaeis guineensis]	GO:0046658(anchored component of plasma membrane)	NA	60	84	75	0.759414	6.5	...((((...(((((((((((((((&)))))))))))))))-..))))...	AAUGGCCCAAGGAAGAGGCAGUGCA&UGCACUGCCUCUUCC-CUGGCUUUU	28	819.264	0	0.00561912	Output/hfu/cleaveLand_result/t_plot/gma-miR408a-3p_L-1R+4_rna-HHC025423.1_75_TPlot.pdf
MSTRG.22921.5:1477	ptc-MIR156j-p3	MSTRG.22921.5	MSTRG.22921	HHC027417	PREDICTED: E3 ubiquitin-protein ligase RHF2A [Elaeis guineensis]	GO:0000209(protein polyubiquitination);GO:0043161(proteasome-mediated ubiquitin-dependent protein catabolic process);GO:0061630(ubiquitin protein ligase activity)	NA	1466	1486	1477	0.784777	4	.((((.(((((((((((((((&))))))))))))))).)))).	AAUGAAGGGAGCAUGGAGAGC&GCUCUCUAUGCUUCUGUCAUC	5	146.297	0	0.00641926	Output/hfu/cleaveLand_result/t_plot/ptc-MIR156j-p3_MSTRG.22921.5_1477_TPlot.pdf
rna-HHC020074.1:845	aof-miR396b_R-1	rna-HHC020074.1	MSTRG.18084	HHC020074	PREDICTED: growth-regulating factor 10-like [Elaeis guineensis]	GO:0005515(protein binding);GO:0005524(ATP binding);GO:0005634(nucleus);GO:0006351(transcription, DNA-templated);GO:0006355(regulation of transcription, DNA-templated);GO:0048366(leaf development)	NA	835	855	845	0.898462	3	.(((((((((((.((((((((&))))))))-))))))))))).	CGUUCAAGAAAGACUGUGGAA&UUCCACAG-CUUUCUUGAACU	163	4769.29	0	0.00361592	Output/hfu/cleaveLand_result/t_plot/aof-miR396b_R-1_rna-HHC020074.1_845_TPlot.pdf
MSTRG.18084.3:865	aof-miR396b_R-1	MSTRG.18084.3	MSTRG.18084	HHC020074	PREDICTED: growth-regulating factor 10-like [Elaeis guineensis]	GO:0005515(protein binding);GO:0005524(ATP binding);GO:0005634(nucleus);GO:0006351(transcription, DNA-templated);GO:0006355(regulation of transcription, DNA-templated);GO:0048366(leaf development)	NA	855	875	865	0.898462	3	.(((((((((((.((((((((&))))))))-))))))))))).	CGUUCAAGAAAGACUGUGGAA&UUCCACAG-CUUUCUUGAACU	151	4418.18	0	0.00481832	Output/hfu/cleaveLand_result/t_plot/aof-miR396b_R-1_MSTRG.18084.3_865_TPlot.pdf
MSTRG.18084.4:742	aof-miR396b_R-1	MSTRG.18084.4	MSTRG.18084	HHC020074	PREDICTED: growth-regulating factor 10-like [Elaeis guineensis]	GO:0005515(protein binding);GO:0005524(ATP binding);GO:0005634(nucleus);GO:0006351(transcription, DNA-templated);GO:0006355(regulation of transcription, DNA-templated);GO:0048366(leaf development)	NA	732	752	742	0.898462	3	.(((((((((((.((((((((&))))))))-))))))))))).	CGUUCAAGAAAGACUGUGGAA&UUCCACAG-CUUUCUUGAACU	147	4301.14	0	0.00281352	Output/hfu/cleaveLand_result/t_plot/aof-miR396b_R-1_MSTRG.18084.4_742_TPlot.pdf
rna-HHC020074.2:775	aof-miR396b_R-1	rna-HHC020074.2	MSTRG.18084	HHC020074	PREDICTED: growth-regulating factor 10-like [Elaeis guineensis]	GO:0005515(protein binding);GO:0005524(ATP binding);GO:0005634(nucleus);GO:0006351(transcription, DNA-templated);GO:0006355(regulation of transcription, DNA-templated);GO:0048366(leaf development)	NA	765	785	775	0.898462	3	.(((((((((((.((((((((&))))))))-))))))))))).	CGUUCAAGAAAGACUGUGGAA&UUCCACAG-CUUUCUUGAACU	138	4037.8	0	0.00201046	Output/hfu/cleaveLand_result/t_plot/aof-miR396b_R-1_rna-HHC020074.2_775_TPlot.pdf
MSTRG.12922.1:451	aof-miR396a	MSTRG.12922.1	MSTRG.12922	HHC012794	PREDICTED: growth-regulating factor 1-like [Elaeis guineensis]	GO:0005634(nucleus);GO:0009739(response to gibberellin);GO:0030912(response to deep water)	NA	440	461	451	0.838798	4	..(((((((((((((.((((((&))))))-)))))))))))))..	CCGUUCAAGAAAGCCUGUGGAA&UUCCAC-GGCUUUCUUGAACUG	48	1404.45	0	0.00241207	Output/hfu/cleaveLand_result/t_plot/aof-miR396a_MSTRG.12922.1_451_TPlot.pdf
rna-HHC012794.1:317	aof-miR396a	rna-HHC012794.1	MSTRG.12922	HHC012794	PREDICTED: growth-regulating factor 1-like [Elaeis guineensis]	GO:0005634(nucleus);GO:0009739(response to gibberellin);GO:0030912(response to deep water)	NA	306	327	317	0.838798	4	..(((((((((((((.((((((&))))))-)))))))))))))..	CCGUUCAAGAAAGCCUGUGGAA&UUCCAC-GGCUUUCUUGAACUG	45	1316.67	0	0.00201046	Output/hfu/cleaveLand_result/t_plot/aof-miR396a_rna-HHC012794.1_317_TPlot.pdf
MSTRG.19015.1:497	aof-miR396a	MSTRG.19015.1	MSTRG.19015	HHC021382	PREDICTED: growth-regulating factor 7-like [Elaeis guineensis]	GO:0005737(cytoplasm);GO:0008757(S-adenosylmethionine-dependent methyltransferase activity);GO:0032259(methylation)	NA	486	507	497	0.833333	4	..(((((((((((((.((((((&))))))-)))))))))))))..	ACGUUCAAGAAAGCCUGUGGAA&UUCCAC-GGCUUUCUUGAACUG	23	672.967	0	0.00601927	Output/hfu/cleaveLand_result/t_plot/aof-miR396a_MSTRG.19015.1_497_TPlot.pdf
rna-HHC021382.1:599	aof-miR396a	rna-HHC021382.1	MSTRG.19015	HHC021382	PREDICTED: growth-regulating factor 7-like [Elaeis guineensis]	GO:0005737(cytoplasm);GO:0008757(S-adenosylmethionine-dependent methyltransferase activity);GO:0032259(methylation)	NA	588	609	599	0.833333	4	..(((((((((((((.((((((&))))))-)))))))))))))..	ACGUUCAAGAAAGCCUGUGGAA&UUCCAC-GGCUUUCUUGAACUG	22	643.708	0	0.00561912	Output/hfu/cleaveLand_result/t_plot/aof-miR396a_rna-HHC021382.1_599_TPlot.pdf
rna-HHC038504.1:385	aof-miR171b_L-1R+2_1ss9CG	rna-HHC038504.1	MSTRG.30244	HHC038504	PREDICTED: LOW QUALITY PROTEIN: nodulation-signaling pathway 2 protein-like [Elaeis guineensis]	GO:0003700(DNA binding transcription factor activity);GO:0005634(nucleus);GO:0006355(regulation of transcription, DNA-templated);GO:0043565(sequence-specific DNA binding)	ko04075(Plant hormone signal transduction)	373	394	385	0.828194	3.5	.(((((((((((((((((((((&))))))))))))))))))))).	CGGGUGAUAUUGGUUCGGCUCA&UGAGCCGGGCCAAUAUCACUCC	97	2838.17	0	0.000804671	Output/hfu/cleaveLand_result/t_plot/aof-miR171b_L-1R+2_1ss9CG_rna-HHC038504.1_385_TPlot.pdf
rna-HHC032300.1:411	aof-miR479_1ss8AG	rna-HHC032300.1	gene-HHC032300	HHC032300	PREDICTED: LOW QUALITY PROTEIN: nodulation-signaling pathway 2 protein-like [Elaeis guineensis]	GO:0003700(DNA binding transcription factor activity);GO:0005634(nucleus);GO:0006355(regulation of transcription, DNA-templated);GO:0043565(sequence-specific DNA binding)	ko04075(Plant hormone signal transduction)	400	420	411	0.9525	1.5	(((((((((((((((((((((&)))))))))))))))))))))	GGGUGAUAUUGGUUCGGCUCA&UGAGCCGGACCAAUAUCACUC	48	1404.45	0	0.000402416	Output/hfu/cleaveLand_result/t_plot/aof-miR479_1ss8AG_rna-HHC032300.1_411_TPlot.pdf
rna-HHC013155.1:468	aof-miR479_R-1_1ss8AG	rna-HHC013155.1	MSTRG.13120	HHC013155	PREDICTED: LOW QUALITY PROTEIN: nodulation-signaling pathway 2 protein-like [Elaeis guineensis]	GO:0003700(DNA binding transcription factor activity);GO:0005634(nucleus);GO:0006355(regulation of transcription, DNA-templated);GO:0043565(sequence-specific DNA binding)	ko04075(Plant hormone signal transduction)	458	477	468	0.932615	2	.(((((((((((((((((((&))))))))))))))))))).	UGUGAUAUUGGUUCGGCUCA&UGAGCCGGACCAAUAUCACU	20	585.189	0	0.00120676	Output/hfu/cleaveLand_result/t_plot/aof-miR479_R-1_1ss8AG_rna-HHC013155.1_468_TPlot.pdf
MSTRG.780.2:152	stu-MIR6027-p3_2ss2GT18TG_1	MSTRG.780.2	MSTRG.780	HHC000916	PREDICTED: MADS-box protein JOINTLESS [Beta vulgaris subsp. vulgaris]	GO:0000977(RNA polymerase II regulatory region sequence-specific DNA binding);GO:0003700(DNA binding transcription factor activity);GO:0005515(protein binding);GO:0005634(nucleus);GO:0005737(cytoplasm);GO:0006351(transcription, DNA-templated);GO:0009739(response to gibberellin);GO:0010076(maintenance of floral meristem identity);GO:0010077(maintenance of inflorescence meristem identity);GO:001022…	NA	144	161	152	0.756863	6.5	.(((((((((((((((..&..))))))))))))))).	AGCUCUUUGAGUUUUCCA&UUGAGAAUUCAAAGAGUG	13	380.373	0	0.0336336	Output/hfu/cleaveLand_result/t_plot/stu-MIR6027-p3_2ss2GT18TG_1_MSTRG.780.2_152_TPlot.pdf
rna-HHC039994.1:104	osa-MIR444b-p3	rna-HHC039994.1	MSTRG.31315	HHC039994	PREDICTED: MADS-box transcription factor 23 isoform X5 [Theobroma cacao]	GO:0000977(RNA polymerase II regulatory region sequence-specific DNA binding);GO:0003700(DNA binding transcription factor activity);GO:0005515(protein binding);GO:0005634(nucleus);GO:0006351(transcription, DNA-templated);GO:0006355(regulation of transcription, DNA-templated);GO:0007275(multicellular organism development);GO:0008134(transcription factor binding);GO:0044212(transcription regulatory…	NA	93	113	104	0.884161	2	((((((((((((.((((((((&)))))))).))))))))))))	GGAGGCAGCAAGAUUGAGACA&UGUCUCAAGCUUGCUGCCUCC	16	468.151	0	0.00120676	Output/hfu/cleaveLand_result/t_plot/osa-MIR444b-p3_rna-HHC039994.1_104_TPlot.pdf
MSTRG.31315.1:104	osa-MIR444b-p3	MSTRG.31315.1	MSTRG.31315	HHC039994	PREDICTED: MADS-box transcription factor 23 isoform X5 [Theobroma cacao]	GO:0000977(RNA polymerase II regulatory region sequence-specific DNA binding);GO:0003700(DNA binding transcription factor activity);GO:0005515(protein binding);GO:0005634(nucleus);GO:0006351(transcription, DNA-templated);GO:0006355(regulation of transcription, DNA-templated);GO:0007275(multicellular organism development);GO:0008134(transcription factor binding);GO:0044212(transcription regulatory…	NA	93	113	104	0.884161	2	((((((((((((.((((((((&)))))))).))))))))))))	GGAGGCAGCAAGAUUGAGACA&UGUCUCAAGCUUGCUGCCUCC	10	292.594	0	0.000804671	Output/hfu/cleaveLand_result/t_plot/osa-MIR444b-p3_MSTRG.31315.1_104_TPlot.pdf
MSTRG.25251.2:138	osa-miR528-5p_1ss16GA	MSTRG.25251.2	MSTRG.25251	HHC030646;HHC030652	PREDICTED: polyphenol oxidase, chloroplastic-like [Elaeis guineensis];PREDICTED: polyphenol oxidase, chloroplastic [Elaeis guineensis]	GO:0004503(monophenol monooxygenase activity);GO:0036263(L-DOPA monooxygenase activity)	ko00350(Tyrosine metabolism);ko00950(Isoquinoline alkaloid biosynthesis)	127	147	138	0.988095	2	((((((((((((((((((((.&.))))))))))))))))))))	CUCCUUUGCGUGCCCCUUCCC&UGGAAGGGGCAUGCAAAGGAG	19	555.929	0	0.00120676	Output/hfu/cleaveLand_result/t_plot/osa-miR528-5p_1ss16GA_MSTRG.25251.2_138_TPlot.pdf
rna-HHC029557.1:1138	aof-miR156c	rna-HHC029557.1	MSTRG.24493	HHC029557	PREDICTED: squamosa promoter-binding-like protein 16 [Elaeis guineensis]	GO:0003677(DNA binding);GO:0003700(DNA binding transcription factor activity);GO:0005634(nucleus);GO:0006355(regulation of transcription, DNA-templated);GO:0048653(anther development)	NA	1128	1147	1138	1	0	((((((((((((((((((((&))))))))))))))))))))	GUGCUCUCUCUCUUCUGUCA&UGACAGAAGAGAGAGAGCAC	4	117.038	0	0.0032148	Output/hfu/cleaveLand_result/t_plot/aof-miR156c_rna-HHC029557.1_1138_TPlot.pdf
rna-HHC019090.1:61	aof-miR536_1ss15GT	rna-HHC019090.1	MSTRG.17515	HHC019089;HHC019088;HHC019090	PREDICTED: uncharacterized protein LOC104709852 [Camelina sativa];Histone H3.2 [Zea mays]	GO:0000786(nucleosome);GO:0003677(DNA binding);GO:0005634(nucleus);GO:0006334(nucleosome assembly);GO:0031492(nucleosomal DNA binding)	NA	50	70	61	0.685714	6.5	..((((((((((-((((.((((&))))-)))).))))))))))..	CUCGCAAGCAGC-UGGCGACGA&UCGU-GCCACGCUGUUUGCGUC	12	351.113	0	0.0301267	Output/hfu/cleaveLand_result/t_plot/aof-miR536_1ss15GT_rna-HHC019090.1_61_TPlot.pdf
rna-HHC014931.1:855	PC-3p-11056_265	rna-HHC014931.1	MSTRG.14395	HHC014931	probable sodium-coupled neutral amino acid transporter 6 isoform X1 [Asparagus officinalis]	GO:0003333(amino acid transmembrane transport);GO:0015171(amino acid transmembrane transporter activity)	NA	845	864	855	0.690058	7	.((((-(((((((((..((((&))))..))))))))).)))).	ACCUC-CUCUUUGGAGACUCA&UGAGAAUUCAAAGAGUGAGGA	4	117.038	0	0.0226812	Output/hfu/cleaveLand_result/t_plot/PC-3p-11056_265_rna-HHC014931.1_855_TPlot.pdf
rna-HHC020999.1:725	aof-miR171c_1ss2TG	rna-HHC020999.1	MSTRG.18726	HHC020999	scarecrow-like protein 6, partial [Asparagus officinalis]	GO:0003700(DNA binding transcription factor activity);GO:0005634(nucleus);GO:0006355(regulation of transcription, DNA-templated);GO:0030154(cell differentiation);GO:0043565(sequence-specific DNA binding)	ko04075(Plant hormone signal transduction)	714	734	725	0.840964	5	.((((((((((((((((((..&..)))))))))))))))))).	UGAGAUAUUGGCGCGGCUCAA&UGGAGCCGCGUCAAUAUCUCC	11	321.854	0	0.000804671	Output/hfu/cleaveLand_result/t_plot/aof-miR171c_1ss2TG_rna-HHC020999.1_725_TPlot.pdf
MSTRG.18726.1:1218	aof-miR171c_1ss2TG	MSTRG.18726.1	MSTRG.18726	HHC020999	scarecrow-like protein 6, partial [Asparagus officinalis]	GO:0003700(DNA binding transcription factor activity);GO:0005634(nucleus);GO:0006355(regulation of transcription, DNA-templated);GO:0030154(cell differentiation);GO:0043565(sequence-specific DNA binding)	ko04075(Plant hormone signal transduction)	1207	1227	1218	0.840964	5	.((((((((((((((((((..&..)))))))))))))))))).	UGAGAUAUUGGCGCGGCUCAA&UGGAGCCGCGUCAAUAUCUCC	7	204.816	0	0.00120676	Output/hfu/cleaveLand_result/t_plot/aof-miR171c_1ss2TG_MSTRG.18726.1_1218_TPlot.pdf
rna-HHC007841.2:122	aof-miR827_R-1	rna-HHC007841.2	MSTRG.9723	HHC007841	SPX domain-containing membrane protein Os06g0129400-like [Asparagus officinalis]	GO:0006817(phosphate ion transport);GO:0009705(plant-type vacuole membrane);GO:0016021(integral component of membrane);GO:0055085(transmembrane transport);GO:1905011(transmembrane phosphate ion transport from cytosol to vacuole)	NA	112	131	122	0.907285	3	...(((((((((((((((((&)))))))))))))))))...	AACUGUUGAUGGUCAUCUAA&UUAGAUGACCAUCAACAAAC	6	175.557	0	0.00241207	Output/hfu/cleaveLand_result/t_plot/aof-miR827_R-1_rna-HHC007841.2_122_TPlot.pdf
MSTRG.20428.5:1785	aof-miR156a	MSTRG.20428.5	MSTRG.20428	HHC023313	squamosa promoter-binding-like protein 12 [Asparagus officinalis]	GO:0003677(DNA binding);GO:0003700(DNA binding transcription factor activity);GO:0005634(nucleus);GO:0006351(transcription, DNA-templated);GO:0006355(regulation of transcription, DNA-templated);GO:0043565(sequence-specific DNA binding);GO:0044212(transcription regulatory region DNA binding);GO:0046872(metal ion binding);GO:0048510(regulation of timing of transition from vegetative to reproductive…	ko04075(Plant hormone signal transduction)	1775	1794	1785	0.938172	1	((((((.(((((((((((((&))))))))))))).))))))	GUGCUCUCUCUCUUCUGUCA&UGACAGAAGAGAGUGAGCAC	14	409.632	0	0.00401688	Output/hfu/cleaveLand_result/t_plot/aof-miR156a_MSTRG.20428.5_1785_TPlot.pdf
MSTRG.20428.6:1785	aof-miR156a	MSTRG.20428.6	MSTRG.20428	HHC023313	squamosa promoter-binding-like protein 12 [Asparagus officinalis]	GO:0003677(DNA binding);GO:0003700(DNA binding transcription factor activity);GO:0005634(nucleus);GO:0006351(transcription, DNA-templated);GO:0006355(regulation of transcription, DNA-templated);GO:0043565(sequence-specific DNA binding);GO:0044212(transcription regulatory region DNA binding);GO:0046872(metal ion binding);GO:0048510(regulation of timing of transition from vegetative to reproductive…	ko04075(Plant hormone signal transduction)	1775	1794	1785	0.938172	1	((((((.(((((((((((((&))))))))))))).))))))	GUGCUCUCUCUCUUCUGUCA&UGACAGAAGAGAGUGAGCAC	11	321.854	0	0.00201046	Output/hfu/cleaveLand_result/t_plot/aof-miR156a_MSTRG.20428.6_1785_TPlot.pdf
MSTRG.17408.1:1843	aof-miR156a	MSTRG.17408.1	MSTRG.17408	HHC018925	squamosa promoter-binding-like protein 12 [Asparagus officinalis]	GO:0003677(DNA binding);GO:0003700(DNA binding transcription factor activity);GO:0005634(nucleus);GO:0006351(transcription, DNA-templated);GO:0006355(regulation of transcription, DNA-templated);GO:0043565(sequence-specific DNA binding);GO:0044212(transcription regulatory region DNA binding);GO:0046872(metal ion binding);GO:0048510(regulation of timing of transition from vegetative to reproductive…	ko04075(Plant hormone signal transduction)	1833	1852	1843	0.938172	1	((((((.(((((((((((((&))))))))))))).))))))	GUGCUCUCUCUCUUCUGUCA&UGACAGAAGAGAGUGAGCAC	10	292.594	0	0.00241207	Output/hfu/cleaveLand_result/t_plot/aof-miR156a_MSTRG.17408.1_1843_TPlot.pdf
rna-HHC018925.2:1911	aof-miR156a	rna-HHC018925.2	MSTRG.17408	HHC018925	squamosa promoter-binding-like protein 12 [Asparagus officinalis]	GO:0003677(DNA binding);GO:0003700(DNA binding transcription factor activity);GO:0005634(nucleus);GO:0006351(transcription, DNA-templated);GO:0006355(regulation of transcription, DNA-templated);GO:0043565(sequence-specific DNA binding);GO:0044212(transcription regulatory region DNA binding);GO:0046872(metal ion binding);GO:0048510(regulation of timing of transition from vegetative to reproductive…	ko04075(Plant hormone signal transduction)	1901	1920	1911	0.938172	1	((((((.(((((((((((((&))))))))))))).))))))	GUGCUCUCUCUCUUCUGUCA&UGACAGAAGAGAGUGAGCAC	9	263.335	0	0.00160869	Output/hfu/cleaveLand_result/t_plot/aof-miR156a_rna-HHC018925.2_1911_TPlot.pdf
MSTRG.20428.3:1859	cpa-miR156a	MSTRG.20428.3	MSTRG.20428	HHC023313	squamosa promoter-binding-like protein 12 [Asparagus officinalis]	GO:0003677(DNA binding);GO:0003700(DNA binding transcription factor activity);GO:0005634(nucleus);GO:0006351(transcription, DNA-templated);GO:0006355(regulation of transcription, DNA-templated);GO:0043565(sequence-specific DNA binding);GO:0044212(transcription regulatory region DNA binding);GO:0046872(metal ion binding);GO:0048510(regulation of timing of transition from vegetative to reproductive…	ko04075(Plant hormone signal transduction)	1849	1868	1859	0.938172	1	((((((.(((((((((((((&))))))))))))).))))))	GUGCUCUCUCUCUUCUGUCA&UGACAGAAGAGAGUGAGCAC	11	321.854	0	0.0032148	Output/hfu/cleaveLand_result/t_plot/cpa-miR156a_MSTRG.20428.3_1859_TPlot.pdf
rna-HHC024872.1:1992	aof-miR393a	rna-HHC024872.1	MSTRG.21339	HHC024872	transport inhibitor response 1-like protein Os04g0395600 [Asparagus officinalis]	GO:0000822(inositol hexakisphosphate binding);GO:0009734(auxin-activated signaling pathway);GO:0010011(auxin binding);GO:0019005(SCF ubiquitin ligase complex)	ko04075(Plant hormone signal transduction)	1980	2001	1992	0.914062	1	(((.((((((((((((((((((&)))))))))))))))))).)))	GAAACAAUGCGAUCCCUUUGGA&UCCAAAGGGAUCGCAUUGAUUC	56	1638.53	0	0.00201046	Output/hfu/cleaveLand_result/t_plot/aof-miR393a_rna-HHC024872.1_1992_TPlot.pdf
MSTRG.21339.1:1701	aof-miR393a	MSTRG.21339.1	MSTRG.21339	HHC024872	transport inhibitor response 1-like protein Os04g0395600 [Asparagus officinalis]	GO:0000822(inositol hexakisphosphate binding);GO:0009734(auxin-activated signaling pathway);GO:0010011(auxin binding);GO:0019005(SCF ubiquitin ligase complex)	ko04075(Plant hormone signal transduction)	1689	1710	1701	0.914062	1	(((.((((((((((((((((((&)))))))))))))))))).)))	GAAACAAUGCGAUCCCUUUGGA&UCCAAAGGGAUCGCAUUGAUUC	47	1375.19	0	0.00241207	Output/hfu/cleaveLand_result/t_plot/aof-miR393a_MSTRG.21339.1_1701_TPlot.pdf
rna-HHC014389.1:1991	aof-miR393a	rna-HHC014389.1	MSTRG.14012	HHC014389	transport inhibitor response 1-like protein Os04g0395600 [Asparagus officinalis]	GO:0000822(inositol hexakisphosphate binding);GO:0009734(auxin-activated signaling pathway)	ko04075(Plant hormone signal transduction)	1979	2000	1991	0.898438	2	(((.((((((((((((((((((&)))))))))))))))))).)))	GAAACAAUGCGGUCCCUUUGGA&UCCAAAGGGAUCGCAUUGAUUC	10	292.594	0	0.00281352	Output/hfu/cleaveLand_result/t_plot/aof-miR393a_rna-HHC014389.1_1991_TPlot.pdf
rna-HHC020574.2:1771	aof-miR393a_1ss22CT	rna-HHC020574.2	MSTRG.18392	HHC020574	transport inhibitor response 1-like protein Os04g0395600 [Asparagus officinalis]	GO:0000822(inositol hexakisphosphate binding);GO:0009734(auxin-activated signaling pathway)	ko04075(Plant hormone signal transduction)	1759	1780	1771	1	0.5	((((((((((((((((((((((&))))))))))))))))))))))	GAAUCAAUGCGAUCCCUUUGGA&UCCAAAGGGAUCGCAUUGAUUU	132	3862.25	0	0.000402416	Output/hfu/cleaveLand_result/t_plot/aof-miR393a_1ss22CT_rna-HHC020574.2_1771_TPlot.pdf
rna-HHC020574.1:1601	aof-miR393a_1ss22CT	rna-HHC020574.1	MSTRG.18392	HHC020574	transport inhibitor response 1-like protein Os04g0395600 [Asparagus officinalis]	GO:0000822(inositol hexakisphosphate binding);GO:0009734(auxin-activated signaling pathway)	ko04075(Plant hormone signal transduction)	1589	1610	1601	1	0.5	((((((((((((((((((((((&))))))))))))))))))))))	GAAUCAAUGCGAUCCCUUUGGA&UCCAAAGGGAUCGCAUUGAUUU	127	3715.95	0	0.00160869	Output/hfu/cleaveLand_result/t_plot/aof-miR393a_1ss22CT_rna-HHC020574.1_1601_TPlot.pdf
rna-HHC020574.3:1755	aof-miR393a_1ss22CT	rna-HHC020574.3	MSTRG.18392	HHC020574	transport inhibitor response 1-like protein Os04g0395600 [Asparagus officinalis]	GO:0000822(inositol hexakisphosphate binding);GO:0009734(auxin-activated signaling pathway)	ko04075(Plant hormone signal transduction)	1743	1764	1755	1	0.5	((((((((((((((((((((((&))))))))))))))))))))))	GAAUCAAUGCGAUCCCUUUGGA&UCCAAAGGGAUCGCAUUGAUUU	120	3511.13	0	0.00120676	Output/hfu/cleaveLand_result/t_plot/aof-miR393a_1ss22CT_rna-HHC020574.3_1755_TPlot.pdf
MSTRG.18392.3:1674	aof-miR393a_1ss22CT	MSTRG.18392.3	MSTRG.18392	HHC020574	transport inhibitor response 1-like protein Os04g0395600 [Asparagus officinalis]	GO:0000822(inositol hexakisphosphate binding);GO:0009734(auxin-activated signaling pathway)	ko04075(Plant hormone signal transduction)	1662	1683	1674	1	0.5	((((((((((((((((((((((&))))))))))))))))))))))	GAAUCAAUGCGAUCCCUUUGGA&UCCAAAGGGAUCGCAUUGAUUU	119	3481.87	0	0.000804671	Output/hfu/cleaveLand_result/t_plot/aof-miR393a_1ss22CT_MSTRG.18392.3_1674_TPlot.pdf
rna-HHC014389.2:1982	aof-miR393a_1ss22CT	rna-HHC014389.2	MSTRG.14012	HHC014389	transport inhibitor response 1-like protein Os04g0395600 [Asparagus officinalis]	GO:0000822(inositol hexakisphosphate binding);GO:0009734(auxin-activated signaling pathway)	ko04075(Plant hormone signal transduction)	1970	1991	1982	0.898352	5	....((((((((((((((((((&))))))))))))))))))....	GAAACAAUGCGGUCCCUUUGGA&UCCAAAGGGAUCGCAUUGAUUU	11	321.854	0	0.00481832	Output/hfu/cleaveLand_result/t_plot/aof-miR393a_1ss22CT_rna-HHC014389.2_1982_TPlot.pdf
rna-HHC052711.1:1988	aof-miR393a_1ss22CT	rna-HHC052711.1	MSTRG.32712	HHC052711	transport inhibitor response 1-like protein Os04g0395600 [Asparagus officinalis]	GO:0000822(inositol hexakisphosphate binding);GO:0009734(auxin-activated signaling pathway)	ko04075(Plant hormone signal transduction)	1976	1997	1988	0.898352	5	....((((((((((((((((((&))))))))))))))))))....	GAAACAAUGCGGUCCCUUUGGA&UCCAAAGGGAUCGCAUUGAUUU	8	234.076	0	0.0032148	Output/hfu/cleaveLand_result/t_plot/aof-miR393a_1ss22CT_rna-HHC052711.1_1988_TPlot.pdf
MSTRG.24459.3:1567	aof-miR393a	MSTRG.24459.3	MSTRG.24459	HHC029515	transport inhibitor response 1-like protein Os04g0395600 [Phoenix dactylifera]	GO:0000822(inositol hexakisphosphate binding);GO:0009734(auxin-activated signaling pathway)	ko04075(Plant hormone signal transduction)	1555	1576	1567	0.898438	2	(((.((((((((((((((((((&)))))))))))))))))).)))	GAAACAAUGCGGUCCCUUUGGA&UCCAAAGGGAUCGCAUUGAUUC	85	2487.05	0	0.00441768	Output/hfu/cleaveLand_result/t_plot/aof-miR393a_MSTRG.24459.3_1567_TPlot.pdf
MSTRG.24459.2:1783	aof-miR393a	MSTRG.24459.2	MSTRG.24459	HHC029515	transport inhibitor response 1-like protein Os04g0395600 [Phoenix dactylifera]	GO:0000822(inositol hexakisphosphate binding);GO:0009734(auxin-activated signaling pathway)	ko04075(Plant hormone signal transduction)	1771	1792	1783	0.898438	2	(((.((((((((((((((((((&)))))))))))))))))).)))	GAAACAAUGCGGUCCCUUUGGA&UCCAAAGGGAUCGCAUUGAUUC	84	2457.79	0	0.00361592	Output/hfu/cleaveLand_result/t_plot/aof-miR393a_MSTRG.24459.2_1783_TPlot.pdf
rna-HHC029515.1:1917	aof-miR393a	rna-HHC029515.1	MSTRG.24459	HHC029515	transport inhibitor response 1-like protein Os04g0395600 [Phoenix dactylifera]	GO:0000822(inositol hexakisphosphate binding);GO:0009734(auxin-activated signaling pathway)	ko04075(Plant hormone signal transduction)	1905	1926	1917	0.898438	2	(((.((((((((((((((((((&)))))))))))))))))).)))	GAAACAAUGCGGUCCCUUUGGA&UCCAAAGGGAUCGCAUUGAUUC	83	2428.53	0	0.0032148	Output/hfu/cleaveLand_result/t_plot/aof-miR393a_rna-HHC029515.1_1917_TPlot.pdf
rna-HHC006849.1:1616	aof-miR393a_1ss22CT	rna-HHC006849.1	MSTRG.9175	HHC006849	transport inhibitor response 1-like protein Os05g0150500 [Phoenix dactylifera]	GO:0000822(inositol hexakisphosphate binding);GO:0009734(auxin-activated signaling pathway)	ko04075(Plant hormone signal transduction)	1604	1625	1616	0.914835	4	....((((((((((((((((((&))))))))))))))))))....	GAGACAAUGCGAUCCCUUUGGA&UCCAAAGGGAUCGCAUUGAUUU	104	3042.98	0	0.00201046	Output/hfu/cleaveLand_result/t_plot/aof-miR393a_1ss22CT_rna-HHC006849.1_1616_TPlot.pdf
MSTRG.33334.1:624	aof-miR156a	MSTRG.33334.1	MSTRG.33334	HHC051462	uncharacterized protein A4U43_C04F14680 [Asparagus officinalis]	GO:0003677(DNA binding);GO:0003700(DNA binding transcription factor activity);GO:0005634(nucleus);GO:0006355(regulation of transcription, DNA-templated);GO:0048653(anther development)	ko04075(Plant hormone signal transduction)	614	633	624	0.951613	1	((((((((((((((((((((&))))))))))))))))))))	GUGCUUGCUCUCUUCUGUCA&UGACAGAAGAGAGUGAGCAC	6	175.557	0	0.000402416	Output/hfu/cleaveLand_result/t_plot/aof-miR156a_MSTRG.33334.1_624_TPlot.pdf
MSTRG.17661.1:624	aof-miR156a	MSTRG.17661.1	MSTRG.17661	HHC019303	uncharacterized protein A4U43_C04F14680 [Asparagus officinalis]	GO:0003677(DNA binding);GO:0003700(DNA binding transcription factor activity);GO:0005634(nucleus);GO:0006355(regulation of transcription, DNA-templated);GO:0048653(anther development)	ko04075(Plant hormone signal transduction)	614	633	624	0.951613	1	((((((((((((((((((((&))))))))))))))))))))	GUGCUUGCUCUCUUCUGUCA&UGACAGAAGAGAGUGAGCAC	5	146.297	0	0.000804671	Output/hfu/cleaveLand_result/t_plot/aof-miR156a_MSTRG.17661.1_624_TPlot.pdf
MSTRG.22233.2:310	aof-miR477a_1ss21GA	MSTRG.22233.2	MSTRG.22233	HHC026231	uncharacterized protein A4U43_C04F16720 [Asparagus officinalis]	GO:0003689(DNA clamp loader activity);GO:0005663(DNA replication factor C complex);GO:0006261(DNA-dependent DNA replication)	ko03030(DNA replication);ko03420(Nucleotide excision repair);ko03430(Mismatch repair)	299	319	310	1	1	.((((((((((((((((((((&)))))))))))))))))))).	AGGAAGCCCUUGAGGGAGAGU&ACUCUCCCUCAAGGGCUUCCA	16	468.151	0	0.000402416	Output/hfu/cleaveLand_result/t_plot/aof-miR477a_1ss21GA_MSTRG.22233.2_310_TPlot.pdf
MSTRG.27705.1:227	aof-miR172	MSTRG.27705.1	MSTRG.27705	HHC034804	uncharacterized protein A4U43_C05F32590 [Asparagus officinalis]	NA	NA	216	236	227	0.965015	3	.(((((((((((((((((((.&.))))))))))))))))))).	CUGCAGCAUCAUCAGGAUUCC&AGAAUCUUGAUGAUGCUGCAU	3	87.7783	0	0.0068191	Output/hfu/cleaveLand_result/t_plot/aof-miR172_MSTRG.27705.1_227_TPlot.pdf
rna-HHC027479.1:833	osa-miR164c	rna-HHC027479.1	MSTRG.22971	HHC027479	uncharacterized protein A4U43_C07F34890 [Asparagus officinalis]	GO:0003677(DNA binding);GO:0003700(DNA binding transcription factor activity);GO:0005634(nucleus);GO:0006351(transcription, DNA-templated);GO:0006355(regulation of transcription, DNA-templated);GO:0007275(multicellular organism development);GO:0009734(auxin-activated signaling pathway);GO:0010072(primary shoot apical meristem specification);GO:0048527(lateral root development)	NA	822	842	833	0.879433	2.5	.(((.((((((((((((((((&)))))))))))))))).))).	AGCAAGUGCCCUGCUUCUCCA&UGGAGAAGCAGGGUACGUGCA	49	1433.71	0	0.000402416	Output/hfu/cleaveLand_result/t_plot/osa-miR164c_rna-HHC027479.1_833_TPlot.pdf
MSTRG.29446.1:1296	aof-miR172	MSTRG.29446.1	MSTRG.29446	HHC037242	uncharacterized protein A4U43_C07F3620 [Asparagus officinalis]	GO:0003677(DNA binding);GO:0003700(DNA binding transcription factor activity);GO:0005634(nucleus);GO:0006351(transcription, DNA-templated);GO:0006355(regulation of transcription, DNA-templated);GO:0009908(flower development);GO:0010073(meristem maintenance);GO:0010093(specification of floral organ identity);GO:0019953(sexual reproduction);GO:0030154(cell differentiation);GO:0048316(seed developme…	NA	1285	1305	1296	0.997085	2	.((((((((((((((((((((&)))))))))))))))))))).	CUGCAGCAUCAUCAGGAUUCU&AGAAUCUUGAUGAUGCUGCAU	12	351.113	0	0.00241207	Output/hfu/cleaveLand_result/t_plot/aof-miR172_MSTRG.29446.1_1296_TPlot.pdf
rna-HHC014854.1:1529	aof-miR172	rna-HHC014854.1	MSTRG.14334	HHC014854	uncharacterized protein A4U43_C07F3620 [Asparagus officinalis]	GO:0003677(DNA binding);GO:0003700(DNA binding transcription factor activity);GO:0005634(nucleus);GO:0006351(transcription, DNA-templated);GO:0006355(regulation of transcription, DNA-templated);GO:0009908(flower development);GO:0010073(meristem maintenance);GO:0010093(specification of floral organ identity);GO:0019953(sexual reproduction);GO:0030154(cell differentiation);GO:0048316(seed developme…	NA	1518	1538	1529	0.997085	2	.((((((((((((((((((((&)))))))))))))))))))).	CUGCAGCAUCAUCAGGAUUCU&AGAAUCUUGAUGAUGCUGCAU	7	204.816	0	0.000804671	Output/hfu/cleaveLand_result/t_plot/aof-miR172_rna-HHC014854.1_1529_TPlot.pdf
MSTRG.2649.1:1246	aof-miR172	MSTRG.2649.1	MSTRG.2649	HHC003638	uncharacterized protein A4U43_C07F3620 [Asparagus officinalis]	NA	NA	1235	1255	1246	0.979592	3	.(((((((((((((((((((.&.))))))))))))))))))).	CUGCAGCAUCAUCAGGAUUCA&AGAAUCUUGAUGAUGCUGCAU	5	146.297	0	0.00401688	Output/hfu/cleaveLand_result/t_plot/aof-miR172_MSTRG.2649.1_1246_TPlot.pdf
rna-HHC014937.1:537	mes-miR171l_2ss9AG21CT	rna-HHC014937.1	gene-HHC014937	HHC014937	uncharacterized protein A4U43_C07F5780 [Asparagus officinalis]	GO:0003700(DNA binding transcription factor activity);GO:0005634(nucleus);GO:0006355(regulation of transcription, DNA-templated);GO:0043565(sequence-specific DNA binding)	ko04075(Plant hormone signal transduction)	526	546	537	0.804124	3	(((((((((((.((((((((.&.)))))))).)))))))))))	AAGUGAUAUUGUCUCGGCUCU&CGAGCCGAGCCAAUAUCACUU	22	643.708	0	0.00201046	Output/hfu/cleaveLand_result/t_plot/mes-miR171l_2ss9AG21CT_rna-HHC014937.1_537_TPlot.pdf
rna-HHC008938.1:1025	aof-miR171a	rna-HHC008938.1	MSTRG.10324	HHC008938	uncharacterized protein A4U43_C08F2120 [Asparagus officinalis]	GO:0003700(DNA binding transcription factor activity);GO:0005634(nucleus);GO:0006355(regulation of transcription, DNA-templated);GO:0030154(cell differentiation);GO:0043565(sequence-specific DNA binding)	ko04075(Plant hormone signal transduction)	1014	1034	1025	1	1	(((((((((((((((((((((&)))))))))))))))))))))	GAUAUUGGCGCGGCUCAAUCA&UGAUUGAGCCGUGCCAAUAUC	17	497.411	0	0.000804671	Output/hfu/cleaveLand_result/t_plot/aof-miR171a_rna-HHC008938.1_1025_TPlot.pdf
rna-HHC052041.1:242	aof-miR171c_1ss2TG	rna-HHC052041.1	MSTRG.33125	HHC052041	uncharacterized protein A4U43_C10F210 [Asparagus officinalis]	GO:0003700(DNA binding transcription factor activity);GO:0005634(nucleus);GO:0006355(regulation of transcription, DNA-templated);GO:0030154(cell differentiation);GO:0043565(sequence-specific DNA binding)	ko04075(Plant hormone signal transduction)	231	251	242	0.840964	5	.((((((((((((((((((..&..)))))))))))))))))).	UGAGAUAUUGGCGCGGCUCAA&UGGAGCCGCGUCAAUAUCUCC	33	965.562	0	0.00160869	Output/hfu/cleaveLand_result/t_plot/aof-miR171c_1ss2TG_rna-HHC052041.1_242_TPlot.pdf
rna-HHC016462.1:1129	aof-miR171c_1ss2TG	rna-HHC016462.1	MSTRG.15590	HHC016462	uncharacterized protein A4U43_C10F210 [Asparagus officinalis]	GO:0003700(DNA binding transcription factor activity);GO:0005634(nucleus);GO:0006355(regulation of transcription, DNA-templated);GO:0030154(cell differentiation);GO:0043565(sequence-specific DNA binding)	ko04075(Plant hormone signal transduction)	1118	1138	1129	0.840964	5	.((((((((((((((((((..&..)))))))))))))))))).	UGAGAUAUUGGCGCGGCUCAA&UGGAGCCGCGUCAAUAUCUCC	25	731.486	0	0.000402416	Output/hfu/cleaveLand_result/t_plot/aof-miR171c_1ss2TG_rna-HHC016462.1_1129_TPlot.pdf
rna-HHC044784.1:502	PC-3p-25651_112	rna-HHC044784.1	MSTRG.7189	HHC044784	uncharacterized protein LOC109820659 [Asparagus officinalis]	GO:0005634(nucleus)	ko03040(Spliceosome);ko04141(Protein processing in endoplasmic reticulum);ko04144(Endocytosis)	491	510	502	0.733333	6.5	.((((((((((((-(((((((&))))))).)))))))))))).	UGCCUGGAUUGUU-UUCUCGG&UUGAGAAUAACGAUCUAGGUU	20	585.189	0	0.00160869	Output/hfu/cleaveLand_result/t_plot/PC-3p-25651_112_rna-HHC044784.1_502_TPlot.pdf
MSTRG.2226.1:1015	gma-MIR5368-p3_1ss17CT	MSTRG.2226.1	MSTRG.2226	HHC002968	acyl-protein thioesterase 2-like [Asparagus officinalis]	GO:0002084(protein depalmitoylation);GO:0005737(cytoplasm);GO:0008474(palmitoyl-(protein) hydrolase activity);GO:0052689(carboxylic ester hydrolase activity)	ko00564(Glycerophospholipid metabolism)	1002	1024	1015	0.682065	6.5	((((((((.(((((((((.(((.&.))).)))))))))-))))))))	UUCUGACAUCAAGGUUGGUGUUG&GAAUUCUAACCUUG-UGUCAGGA	3	87.7783	1	0.0129592	Output/hfu/cleaveLand_result/t_plot/gma-MIR5368-p3_1ss17CT_MSTRG.2226.1_1015_TPlot.pdf
MSTRG.28637.1:2388	aof-miR167a	MSTRG.28637.1	MSTRG.28637	HHC036096	auxin response factor 12-like isoform X1 [Phoenix dactylifera]	GO:0003700(DNA binding transcription factor activity);GO:0005515(protein binding);GO:0005634(nucleus);GO:0006351(transcription, DNA-templated);GO:0006355(regulation of transcription, DNA-templated);GO:0009733(response to auxin);GO:0009734(auxin-activated signaling pathway);GO:0009908(flower development);GO:0043565(sequence-specific DNA binding)	ko04075(Plant hormone signal transduction)	2377	2397	2388	0.820051	4	(((((((.(((((((((((..&..))))))))))).)))))))	UAGAUCAGGCUGGCAGCUUGU&UGAAGCUGCCAGCAUGAUCUA	4	117.038	1	0.00113361	Output/hfu/cleaveLand_result/t_plot/aof-miR167a_MSTRG.28637.1_2388_TPlot.pdf
MSTRG.4278.5:125	stu-miR391-5p_2ss1TC2AT	MSTRG.4278.5	MSTRG.4278	HHC040574	calcium-transporting ATPase 8, plasma membrane-type-like [Asparagus officinalis];uncharacterized protein A4U43_C05F35230 [Asparagus officinalis]	GO:0005388(calcium-transporting ATPase activity);GO:0005887(integral component of plasma membrane);GO:0043231(intracellular membrane-bounded organelle)	NA	114	134	125	0.831325	3.5	.(((((((((((((((((((.&.))))))))))))))))))).	AGGUGUCAUCUCUCCUGCGAC&CUCGCAGGAGAGAUGAUGCUG	3	87.7783	1	0.00169993	Output/hfu/cleaveLand_result/t_plot/stu-miR391-5p_2ss1TC2AT_MSTRG.4278.5_125_TPlot.pdf
rna-HHC005123.1:1070	aof-miR166c_3ss17CT20CT21CT	rna-HHC005123.1	MSTRG.3469	HHC005123	class III homeobox-leucine zipper protein [Asparagus asparagoides];homeobox-leucine zipper protein HOX9-like [Asparagus officinalis]	GO:0003677(DNA binding);GO:0003700(DNA binding transcription factor activity);GO:0005634(nucleus);GO:0006351(transcription, DNA-templated);GO:0006355(regulation of transcription, DNA-templated);GO:0008289(lipid binding);GO:0009855(determination of bilateral symmetry);GO:0009944(polarity specification of adaxial/abaxial axis);GO:0009956(radial pattern formation);GO:0010014(meristem initiation);GO:…	NA	1059	1079	1070	0.945	3.5	..((((((((((((((((((.&.))))))))))))))))))..	CUGGGAUGAAGCCUGGUCCGG&UCGGACCAGGCUUCAUUCCUU	3	87.7783	1	0.00509111	Output/hfu/cleaveLand_result/t_plot/aof-miR166c_3ss17CT20CT21CT_rna-HHC005123.1_1070_TPlot.pdf
rna-HHC005123.3:938	aof-miR166c_3ss17CT20CT21CT	rna-HHC005123.3	MSTRG.3469	HHC005123	class III homeobox-leucine zipper protein [Asparagus asparagoides];homeobox-leucine zipper protein HOX9-like [Asparagus officinalis]	GO:0003677(DNA binding);GO:0003700(DNA binding transcription factor activity);GO:0005634(nucleus);GO:0006351(transcription, DNA-templated);GO:0006355(regulation of transcription, DNA-templated);GO:0008289(lipid binding);GO:0009855(determination of bilateral symmetry);GO:0009944(polarity specification of adaxial/abaxial axis);GO:0009956(radial pattern formation);GO:0010014(meristem initiation);GO:…	NA	927	947	938	0.945	3.5	..((((((((((((((((((.&.))))))))))))))))))..	CUGGGAUGAAGCCUGGUCCGG&UCGGACCAGGCUUCAUUCCUU	2	58.5189	1	0.000566964	Output/hfu/cleaveLand_result/t_plot/aof-miR166c_3ss17CT20CT21CT_rna-HHC005123.3_938_TPlot.pdf
rna-HHC039468.1:384	aof-miR396a	rna-HHC039468.1	MSTRG.30916	HHC039468	growth-regulating factor 4-like protein [Cinnamomum micranthum f. kanehirae]	GO:0005737(cytoplasm);GO:0008757(S-adenosylmethionine-dependent methyltransferase activity);GO:0032259(methylation)	NA	373	394	384	0.838798	4	..(((((((((((((.((((((&))))))-)))))))))))))..	CCGUUCAAGAAAGCCAGUGGAA&UUCCAC-GGCUUUCUUGAACUG	2	58.5189	1	0.00509111	Output/hfu/cleaveLand_result/t_plot/aof-miR396a_rna-HHC039468.1_384_TPlot.pdf
rna-HHC053904.1:208	aof-miR166a_L-2R+2_1	rna-HHC053904.1	MSTRG.35064	HHC053904	homeobox-leucine zipper protein HOX32-like [Asparagus officinalis]	GO:0003677(DNA binding);GO:0003700(DNA binding transcription factor activity);GO:0005634(nucleus);GO:0006351(transcription, DNA-templated);GO:0006355(regulation of transcription, DNA-templated);GO:0008289(lipid binding);GO:0009855(determination of bilateral symmetry);GO:0009944(polarity specification of adaxial/abaxial axis);GO:0009955(adaxial/abaxial pattern specification);GO:0010014(meristem in…	NA	195	217	208	0.85941	3.5	((..((((((((((((((((((.&.))))))))))))))))))--))	GGUUGGGAUGAAGCCUGGUCCGG&UCGGACCAGGCUUCAUUCC--CC	3	87.7783	1	0.00113361	Output/hfu/cleaveLand_result/t_plot/aof-miR166a_L-2R+2_1_rna-HHC053904.1_208_TPlot.pdf
rna-HHC045651.3:873	aof-miR164_2ss20CT21AT	rna-HHC045651.3	MSTRG.7719	HHC045651	hypothetical protein GOBAR_DD31476 [Gossypium barbadense];DNA repair protein recA homolog 1, chloroplastic isoform X1 [Asparagus officinalis];uncharacterized protein A4U43_C07F34890 [Asparagus officinalis]	GO:0000150(recombinase activity);GO:0000400(four-way junction DNA binding);GO:0000730(DNA recombinase assembly);GO:0003690(double-stranded DNA binding);GO:0003697(single-stranded DNA binding);GO:0004520(endodeoxyribonuclease activity);GO:0006312(mitotic recombination);GO:0008094(DNA-dependent ATPase activity);GO:0010212(response to ionizing radiation);GO:0042148(strand invasion);GO:0003677(DNA bi…	ko03440(Homologous recombination)	862	882	873	0.897375	1.5	((((.((((((((((((((((&)))))))))))))))).))))	AGCAAGUGCCCUGCUUCUCCA&UGGAGAAGCAGGGCACGUGUU	4	117.038	1	0.0028316	Output/hfu/cleaveLand_result/t_plot/aof-miR164_2ss20CT21AT_rna-HHC045651.3_873_TPlot.pdf
MSTRG.12157.14:752	PC-5p-73262_33	MSTRG.12157.14	MSTRG.12157	HHC011565;HHC011570;HHC011562	hypothetical protein VITISV_018069 [Vitis vinifera];LOW QUALITY PROTEIN: probable cellulose synthase A catalytic subunit 1 [UDP-forming] [Dendrobium catenatum];probable cellulose synthase A catalytic subunit 1 [UDP-forming] [Asparagus officinalis];probable cellulose synthase A catalytic subunit 1 [UDP-forming] [Phoenix dactylifera]	GO:0000977(RNA polymerase II regulatory region sequence-specific DNA binding);GO:0005515(protein binding);GO:0005768(endosome);GO:0005794(Golgi apparatus);GO:0005802(trans-Golgi network);GO:0005886(plasma membrane);GO:0009825(multidimensional cell growth);GO:0009832(plant-type cell wall biogenesis);GO:0009833(plant-type primary cell wall biogenesis);GO:0016021(integral component of membrane);GO:0…	NA	741	761	752	0.740984	7	((((((.((((((((((((..&..)))))))))))).))))))	UGUCCUUGUUGUCAACAUGGU&UAUAUGUUGAUAACUGGGAUA	2	58.5189	1	0.0151957	Output/hfu/cleaveLand_result/t_plot/PC-5p-73262_33_MSTRG.12157.14_752_TPlot.pdf
rna-HHC026290.1:38	osa-MIR159e-p5_2ss18AC21AC	rna-HHC026290.1	MSTRG.22256	HHC026290	LOW QUALITY PROTEIN: zinc finger CCCH domain-containing protein 19-like [Asparagus officinalis]	GO:0004579(dolichyl-diphosphooligosaccharide-protein glycotransferase activity);GO:0008250(oligosaccharyltransferase complex);GO:0018279(protein N-linked glycosylation via asparagine);GO:0043687(post-translational protein modification)	NA	27	46	38	0.693046	6	(((((.((((((-(((((((.&.))))))).)))))).)))))	GCAGCGUCUGAG-CAUGCGAG&UUUGCAUGACUCGGGAGCUGC	2	58.5189	1	0.0345507	Output/hfu/cleaveLand_result/t_plot/osa-MIR159e-p5_2ss18AC21AC_rna-HHC026290.1_38_TPlot.pdf
rna-HHC013216.1:446	osa-MIR444b-p5	rna-HHC013216.1	gene-HHC013216	HHC013216	MADS-box transcription factor 23-like isoform X2 [Phoenix dactylifera]	GO:0000977(RNA polymerase II regulatory region sequence-specific DNA binding);GO:0003700(DNA binding transcription factor activity);GO:0005515(protein binding);GO:0005634(nucleus);GO:0006351(transcription, DNA-templated);GO:0006355(regulation of transcription, DNA-templated);GO:0007275(multicellular organism development);GO:0008134(transcription factor binding);GO:0044212(transcription regulatory…	NA	435	455	446	0.86052	2.5	(((((((.(((((((((((((&))))))))))))).)))))))	GGAGGCGUCGAGCUUGAGACA&UGUCUCAAGCUUGCUGCCUCC	5	146.297	1	0.003962	Output/hfu/cleaveLand_result/t_plot/osa-MIR444b-p5_rna-HHC013216.1_446_TPlot.pdf
MSTRG.12101.1:657	PC-5p-73262_33	MSTRG.12101.1	MSTRG.12101	NA	NA	NA	NA	646	666	657	0.740984	7	((((((.((((((((((((..&..)))))))))))).))))))	UGUCCUUGUUGUCAACAUGGU&UAUAUGUUGAUAACUGGGAUA	2	58.5189	1	0.0190975	Output/hfu/cleaveLand_result/t_plot/PC-5p-73262_33_MSTRG.12101.1_657_TPlot.pdf
MSTRG.25884.1:174	ptc-miR6478_R-1_1ss10GA	MSTRG.25884.1	MSTRG.25884	HHC031796	NA	NA	NA	164	183	174	0.715084	6.5	((((((.((((((((((((.&.)))))))))))).))))))	GCCGGCCGGGUUAGGGUUGU&CCGACCUUAACUCAGUUGGU	3	87.7783	1	0.0296104	Output/hfu/cleaveLand_result/t_plot/ptc-miR6478_R-1_1ss10GA_MSTRG.25884.1_174_TPlot.pdf
MSTRG.26209.4:96	aof-miR395a_1ss21TA	MSTRG.26209.4	MSTRG.26209	HHC032364	peroxisome biogenesis protein 16 [Asparagus officinalis]	GO:0005778(peroxisomal membrane);GO:0007031(peroxisome organization)	ko04146(Peroxisome)	84	105	96	0.700787	6.5	(((.(((.(((((((((((((.&.)))))))))))))-))).)))	UGGCUUCUCCCCGAGCGCUUCU&UGAAGUGUUUGGGG-GAACUCA	2	58.5189	1	0.0405548	Output/hfu/cleaveLand_result/t_plot/aof-miR395a_1ss21TA_MSTRG.26209.4_96_TPlot.pdf
rna-HHC025708.1:662	mdm-miR408a_L-1R+4	rna-HHC025708.1	MSTRG.21955	HHC025708	PREDICTED: blue copper protein-like [Musa acuminata subsp. malaccensis]	GO:0046658(anchored component of plasma membrane)	NA	648	671	662	0.702929	7	....(((((((.((((.(((((((&))))))).)))).)))))))....	CUUUGCCAGGGUAGAGACAGUGCA&UGCACUGCCUCUUCCCUGGCUUUU	5	146.297	1	0.0235378	Output/hfu/cleaveLand_result/t_plot/mdm-miR408a_L-1R+4_rna-HHC025708.1_662_TPlot.pdf
MSTRG.6196.2:689	aof-miR168b_R-1_1ss20TA	MSTRG.6196.2	MSTRG.6196	HHC043530	PREDICTED: protein argonaute 1B isoform X2 [Musa acuminata subsp. malaccensis]	GO:0005515(protein binding)	NA	679	698	689	0.807963	4	((((.(((((((((((((..&..))))))))))))).))))	UCCCAACCUGCACCAAGCUC&UCGCUUGGUGCAGGUCGGGA	2	58.5189	1	0.003962	Output/hfu/cleaveLand_result/t_plot/aof-miR168b_R-1_1ss20TA_MSTRG.6196.2_689_TPlot.pdf
rna-HHC025385.1:861	gma-MIR4995-p5_1ss18GC	rna-HHC025385.1	MSTRG.21730	HHC025385	PREDICTED: protein indeterminate-domain 16 [Elaeis guineensis]	GO:0003676(nucleic acid binding);GO:0003700(DNA binding transcription factor activity);GO:0005515(protein binding);GO:0005634(nucleus);GO:0006351(transcription, DNA-templated);GO:0006355(regulation of transcription, DNA-templated);GO:0008270(zinc ion binding);GO:0009630(gravitropism);GO:0009965(leaf morphogenesis);GO:0010601(positive regulation of auxin biosynthetic process);GO:0043621(protein se…	ko00052(Galactose metabolism);ko00600(Sphingolipid metabolism);ko00531(Glycosaminoglycan degradation);ko00604(Glycosphingolipid biosynthesis - ganglio series);ko00511(Other glycan degradation)	853	870	861	0.775701	7	.(((((((((((..((((&))))..))))))))))).	UUUCCCUUGGCCCUGCCA&UGGCUUGGUUAAGGGAAC	2	58.5189	1	0.0378303	Output/hfu/cleaveLand_result/t_plot/gma-MIR4995-p5_1ss18GC_rna-HHC025385.1_861_TPlot.pdf
MSTRG.24090.1:494	gma-miR6300_L-1R+5	MSTRG.24090.1	MSTRG.24090	HHC029032	PREDICTED: protein YLS9 [Elaeis guineensis]	GO:0006952(defense response);GO:0009506(plasmodesma);GO:0046658(anchored component of plasma membrane)	NA	483	503	494	0.781671	7	((((((((((-(((((((((..&..))))))))).))))))))))	GCUCACCGCU-UACUACGACUC&UCGUUGUAGUAUAGUGGUGAGU	2	58.5189	1	0.003962	Output/hfu/cleaveLand_result/t_plot/gma-miR6300_L-1R+5_MSTRG.24090.1_494_TPlot.pdf
rna-HHC045241.1:165	ath-MIR846-p3_2ss16TA17CT	rna-HHC045241.1	gene-HHC045241	HHC045241	PREDICTED: ubiquitin-conjugating enzyme 15-like [Gossypium raimondii]	GO:0000209(protein polyubiquitination);GO:0005634(nucleus);GO:0005737(cytoplasm);GO:0031625(ubiquitin protein ligase binding);GO:0043161(proteasome-mediated ubiquitin-dependent protein catabolic process);GO:0061630(ubiquitin protein ligase activity)	ko04120(Ubiquitin mediated proteolysis)	157	173	165	0.779359	5.5	(((((((.(((((-((((&)))).))))).)))))))	GAUUCAUGGUCCC-CUGC&GCAGUGGGAUAAUGAAUU	2	58.5189	1	0.0257504	Output/hfu/cleaveLand_result/t_plot/ath-MIR846-p3_2ss16TA17CT_rna-HHC045241.1_165_TPlot.pdf
MSTRG.16556.12:685	ptc-miR6478_R+1_1ss21GA	MSTRG.16556.12	MSTRG.16556	HHC017743;HHC017745;HHC017746;HHC017744	protein DMR6-LIKE OXYGENASE 2-like [Asparagus officinalis]	GO:0051213(dioxygenase activity)	ko00940(Phenylpropanoid biosynthesis)	672	694	685	0.729216	7	.((((((((..((((((((((((&))))))))))))-.)))))))).	AUACCGGCUUCAGCUGAGGUUGG&CCGACCUUAGCU-CAGUUGGUAG	2	58.5189	1	0.0123992	Output/hfu/cleaveLand_result/t_plot/ptc-miR6478_R+1_1ss21GA_MSTRG.16556.12_685_TPlot.pdf
rna-HHC015557.2:657	osa-miR166d-5p	rna-HHC015557.2	MSTRG.14856	HHC015556;HHC015557	protein NPGR1 isoform X1 [Asparagus officinalis];PREDICTED: tetratricopeptide repeat protein 7A [Elaeis guineensis]	GO:0005516(calmodulin binding);GO:0005634(nucleus);GO:0005886(plasma membrane);GO:0008150(biological_process)	NA	646	666	657	0.710462	6.5	..(((((((((((.(((((((&))))))).)))))))))))..	GAUUGAGCCAGAUUACGUUCC&GGAAUGUUGUCUGGCUCGAGG	2	58.5189	1	0.011839	Output/hfu/cleaveLand_result/t_plot/osa-miR166d-5p_rna-HHC015557.2_657_TPlot.pdf
rna-HHC037772.1:1697	lus-MIR172d-p5_2ss9CA17AT	rna-HHC037772.1	gene-HHC037772	HHC037772	receptor-like serine/threonine-protein kinase SD1-8 isoform X3 [Asparagus officinalis]	GO:0004674(protein serine/threonine kinase activity);GO:0005886(plasma membrane);GO:0006468(protein phosphorylation);GO:0006952(defense response);GO:0009506(plasmodesma)	NA	1685	1706	1697	0.746667	4.5	((((...((((((((((((((.&.))))))))))))))-..))))	AGCUUCAGCAUGUUAAUCUUGU&UCAAGAUUAACAUGU-AUAGCU	4	117.038	1	0.00621895	Output/hfu/cleaveLand_result/t_plot/lus-MIR172d-p5_2ss9CA17AT_rna-HHC037772.1_1697_TPlot.pdf
rna-HHC031546.1:422	aof-miR159_1ss20TC	rna-HHC031546.1	MSTRG.25738	HHC031546	sphinganine C4-monooxygenase 1-like [Asparagus officinalis]	GO:0000170(sphingosine hydroxylase activity);GO:0003824(catalytic activity);GO:0005506(iron ion binding);GO:0005783(endoplasmic reticulum);GO:0005789(endoplasmic reticulum membrane);GO:0005794(Golgi apparatus);GO:0009640(photomorphogenesis);GO:0016021(integral component of membrane);GO:0042284(sphingolipid delta-4 desaturase activity);GO:0046520(sphingoid biosynthetic process);GO:0055114(oxidatio…	ko00600(Sphingolipid metabolism)	411	430	422	0.774026	5.5	(((((((((((((((-(((..&..))).)))))))))))))))	UGGAGCUCUCUUCAA-CCACC&UUUGGAUUGAAGGGAGCUCCA	3	87.7783	1	0.0151957	Output/hfu/cleaveLand_result/t_plot/aof-miR159_1ss20TC_rna-HHC031546.1_422_TPlot.pdf
rna-HHC037962.1:580	aof-miR156c	rna-HHC037962.1	MSTRG.29912	HHC037962	squamosa promoter-binding protein 1 [Asparagus officinalis]	GO:0003677(DNA binding);GO:0003700(DNA binding transcription factor activity);GO:0005634(nucleus);GO:0005737(cytoplasm);GO:0006351(transcription, DNA-templated);GO:0006355(regulation of transcription, DNA-templated);GO:0010321(regulation of vegetative phase change);GO:0046872(metal ion binding)	NA	570	589	580	0.967914	1	.(((((((((((((((((((&))))))))))))))))))).	UUGCUCUCUCUCUUCUGUCA&UGACAGAAGAGAGAGAGCAC	3	87.7783	1	0.0135188	Output/hfu/cleaveLand_result/t_plot/aof-miR156c_rna-HHC037962.1_580_TPlot.pdf
rna-HHC018925.1:1718	aof-miR156a	rna-HHC018925.1	MSTRG.17408	HHC018925	squamosa promoter-binding-like protein 12 [Asparagus officinalis]	GO:0003677(DNA binding);GO:0003700(DNA binding transcription factor activity);GO:0005634(nucleus);GO:0006351(transcription, DNA-templated);GO:0006355(regulation of transcription, DNA-templated);GO:0043565(sequence-specific DNA binding);GO:0044212(transcription regulatory region DNA binding);GO:0046872(metal ion binding);GO:0048510(regulation of timing of transition from vegetative to reproductive…	ko04075(Plant hormone signal transduction)	1708	1727	1718	0.938172	1	((((((.(((((((((((((&))))))))))))).))))))	GUGCUCUCUCUCUUCUGUCA&UGACAGAAGAGAGUGAGCAC	7	204.816	1	0.003962	Output/hfu/cleaveLand_result/t_plot/aof-miR156a_rna-HHC018925.1_1718_TPlot.pdf
MSTRG.17408.3:1402	aof-miR156c	MSTRG.17408.3	MSTRG.17408	HHC018925	squamosa promoter-binding-like protein 12 [Asparagus officinalis]	GO:0003677(DNA binding);GO:0003700(DNA binding transcription factor activity);GO:0005634(nucleus);GO:0006351(transcription, DNA-templated);GO:0006355(regulation of transcription, DNA-templated);GO:0043565(sequence-specific DNA binding);GO:0044212(transcription regulatory region DNA binding);GO:0046872(metal ion binding);GO:0048510(regulation of timing of transition from vegetative to reproductive…	ko04075(Plant hormone signal transduction)	1392	1411	1402	1	0	((((((((((((((((((((&))))))))))))))))))))	GUGCUCUCUCUCUUCUGUCA&UGACAGAAGAGAGAGAGCAC	6	175.557	1	0.000566964	Output/hfu/cleaveLand_result/t_plot/aof-miR156c_MSTRG.17408.3_1402_TPlot.pdf
rna-HHC023313.1:1981	cpa-miR156a	rna-HHC023313.1	MSTRG.20428	HHC023313	squamosa promoter-binding-like protein 12 [Asparagus officinalis]	GO:0003677(DNA binding);GO:0003700(DNA binding transcription factor activity);GO:0005634(nucleus);GO:0006351(transcription, DNA-templated);GO:0006355(regulation of transcription, DNA-templated);GO:0043565(sequence-specific DNA binding);GO:0044212(transcription regulatory region DNA binding);GO:0046872(metal ion binding);GO:0048510(regulation of timing of transition from vegetative to reproductive…	ko04075(Plant hormone signal transduction)	1971	1990	1981	0.938172	1	((((((.(((((((((((((&))))))))))))).))))))	GUGCUCUCUCUCUUCUGUCA&UGACAGAAGAGAGUGAGCAC	6	175.557	1	0.003962	Output/hfu/cleaveLand_result/t_plot/cpa-miR156a_rna-HHC023313.1_1981_TPlot.pdf
MSTRG.14334.2:1440	aof-miR172	MSTRG.14334.2	MSTRG.14334	HHC014854	uncharacterized protein A4U43_C07F3620 [Asparagus officinalis]	GO:0003677(DNA binding);GO:0003700(DNA binding transcription factor activity);GO:0005634(nucleus);GO:0006351(transcription, DNA-templated);GO:0006355(regulation of transcription, DNA-templated);GO:0009908(flower development);GO:0010073(meristem maintenance);GO:0010093(specification of floral organ identity);GO:0019953(sexual reproduction);GO:0030154(cell differentiation);GO:0048316(seed developme…	NA	1429	1449	1440	0.997085	2	.((((((((((((((((((((&)))))))))))))))))))).	CUGCAGCAUCAUCAGGAUUCU&AGAAUCUUGAUGAUGCUGCAU	6	175.557	1	0.0028316	Output/hfu/cleaveLand_result/t_plot/aof-miR172_MSTRG.14334.2_1440_TPlot.pdf
MSTRG.10020.1:1262	aof-miR172	MSTRG.10020.1	MSTRG.10020	HHC008487	uncharacterized protein A4U43_C07F3620 [Asparagus officinalis]	GO:0010227(floral organ abscission);GO:0048316(seed development);GO:0048461(flower structural organization);GO:0080187(floral organ senescence)	NA	1251	1271	1262	0.976676	3	.(((((((((((((((((((.&.))))))))))))))))))).	CUGCAGCAUCAUCAGGAUUCG&AGAAUCUUGAUGAUGCUGCAU	5	146.297	1	0.00621895	Output/hfu/cleaveLand_result/t_plot/aof-miR172_MSTRG.10020.1_1262_TPlot.pdf
rna-HHC013631.2:2337	PC-3p-67208_37	rna-HHC013631.2	MSTRG.13448	HHC013631	uncharacterized protein LOC109833429 [Asparagus officinalis];uncharacterized protein LOC109850221 [Asparagus officinalis]	GO:0006281(DNA repair);GO:0006284(base-excision repair);GO:0008725(DNA-3-methyladenine glycosylase activity)	ko03410(Base excision repair)	2326	2346	2337	0.8	7	..(((((((((((((((((..&..)))))))))))))))))..	CCACCUCAUUUCCUGCCCUCG&UAGGGGUAGGAAAUGAGGUCU	2	58.5189	1	0.00169993	Output/hfu/cleaveLand_result/t_plot/PC-3p-67208_37_rna-HHC013631.2_2337_TPlot.pdf
MSTRG.551.3:1242	aly-miR165a-3p_R+1	MSTRG.551.3	MSTRG.551	HHC000597	homeobox-leucine zipper protein ATHB-15-like isoform X2 [Asparagus officinalis]	GO:0003677(DNA binding);GO:0003700(DNA binding transcription factor activity);GO:0005634(nucleus);GO:0006351(transcription, DNA-templated);GO:0006355(regulation of transcription, DNA-templated);GO:0008289(lipid binding);GO:0009855(determination of bilateral symmetry);GO:0009965(leaf morphogenesis);GO:0010014(meristem initiation);GO:0010073(meristem maintenance);GO:0010075(regulation of meristem g…	NA	1231	1251	1242	0.899554	3	..((((((((((((((((((.&.))))))))))))))))))..	CUGGGAUGAAGCCUGGUCCGG&UCGGACCAGGCUUCAUCCCCA	2	58.5189	2	0.0127881	Output/hfu/cleaveLand_result/t_plot/aly-miR165a-3p_R+1_MSTRG.551.3_1242_TPlot.pdf
rna-HHC005123.4:1073	aof-miR166c_3ss17CT20CT21CT	rna-HHC005123.4	MSTRG.3469	HHC005123	class III homeobox-leucine zipper protein [Asparagus asparagoides];homeobox-leucine zipper protein HOX9-like [Asparagus officinalis]	GO:0003677(DNA binding);GO:0003700(DNA binding transcription factor activity);GO:0005634(nucleus);GO:0006351(transcription, DNA-templated);GO:0006355(regulation of transcription, DNA-templated);GO:0008289(lipid binding);GO:0009855(determination of bilateral symmetry);GO:0009944(polarity specification of adaxial/abaxial axis);GO:0009956(radial pattern formation);GO:0010014(meristem initiation);GO:…	NA	1062	1082	1073	0.945	3.5	..((((((((((((((((((.&.))))))))))))))))))..	CUGGGAUGAAGCCUGGUCCGG&UCGGACCAGGCUUCAUUCCUU	2	58.5189	2	0.0378758	Output/hfu/cleaveLand_result/t_plot/aof-miR166c_3ss17CT20CT21CT_rna-HHC005123.4_1073_TPlot.pdf
rna-HHC005458.2:77	osa-MIR398a-p3_1ss11AG	rna-HHC005458.2	MSTRG.3658	HHC005458	copper/zinc superoxide dismutase, partial [Allium sativum]	GO:0004784(superoxide dismutase activity);GO:0005507(copper ion binding);GO:0005737(cytoplasm);GO:0008270(zinc ion binding);GO:0019430(removal of superoxide radicals)	ko04146(Peroxisome)	66	86	77	0.778032	5	(((((((((((.((((((((.&.)))))))).)))))))))))	UCCAAGGGGGUUACCUGAGAU&UUCUCAGGUCGCCCCUUUGGG	6	175.557	2	0.0378758	Output/hfu/cleaveLand_result/t_plot/osa-MIR398a-p3_1ss11AG_rna-HHC005458.2_77_TPlot.pdf
rna-HHC010017.1:337	lja-miR477-5p_R-1_1ss1AG	rna-HHC010017.1	gene-HHC010017	HHC010017	DELLA protein RGL1-like protein [Cinnamomum micranthum f. kanehirae]	GO:0003700(DNA binding transcription factor activity);GO:0005634(nucleus);GO:0006355(regulation of transcription, DNA-templated);GO:0043565(sequence-specific DNA binding)	ko04075(Plant hormone signal transduction)	326	346	337	0.868481	2	((((((((((((((((((((.&.))))))))))))))))))))	UAGAAGCCUUUGAGGGAGAGA&GCUCUCCCUCAAGGGCUUCUG	6	175.557	2	0.0378758	Output/hfu/cleaveLand_result/t_plot/lja-miR477-5p_R-1_1ss1AG_rna-HHC010017.1_337_TPlot.pdf
MSTRG.31112.9:1314	PC-3p-25677_112	MSTRG.31112.9	MSTRG.31112	HHC039721;HHC039720	elongation factor 1-alpha isoform X1 [Jatropha curcas];Elongation factor 1-alpha, partial [Mucuna pruriens]	GO:0003746(translation elongation factor activity);GO:0003924(GTPase activity);GO:0005622(intracellular)	ko03013(RNA transport)	1303	1323	1314	0.856764	5	(((((((((((((((((((..&..)))))))))))))))))))	ACUGGAGCCAAGGAUGAUCCA&CAGGUCAUCCUUGGCUUUAGU	11	321.854	2	0.0378758	Output/hfu/cleaveLand_result/t_plot/PC-3p-25677_112_MSTRG.31112.9_1314_TPlot.pdf
MSTRG.551.4:1161	aof-miR166a_L-2R+1	MSTRG.551.4	MSTRG.551	HHC000597	homeobox-leucine zipper protein ATHB-15-like isoform X2 [Asparagus officinalis]	GO:0003677(DNA binding);GO:0003700(DNA binding transcription factor activity);GO:0005634(nucleus);GO:0006351(transcription, DNA-templated);GO:0006355(regulation of transcription, DNA-templated);GO:0008289(lipid binding);GO:0009855(determination of bilateral symmetry);GO:0009965(leaf morphogenesis);GO:0010014(meristem initiation);GO:0010073(meristem maintenance);GO:0010075(regulation of meristem g…	NA	1151	1170	1161	0.966752	2.5	.((((((((((((((((((.&.)))))))))))))))))).	UGGGAUGAAGCCUGGUCCGG&UCGGACCAGGCUUCAUUCCU	3	87.7783	2	0.0254127	Output/hfu/cleaveLand_result/t_plot/aof-miR166a_L-2R+1_MSTRG.551.4_1161_TPlot.pdf
rna-HHC036511.1:2274	mtr-MIR2600a-p5_2ss6GC18CA	rna-HHC036511.1	MSTRG.28936	HHC036511	LOW QUALITY PROTEIN: DEAD-box ATP-dependent RNA helicase 37-like [Asparagus officinalis]	GO:0004004(ATP-dependent RNA helicase activity);GO:0010501(RNA secondary structure unwinding)	NA	2265	2283	2274	0.847015	4	...((((((((((((((((&))))))))))))))))...	UGGUUGUGUUUUUGUCUCU&AGAGACAGAAACACAAAAA	2	58.5189	2	0.0127881	Output/hfu/cleaveLand_result/t_plot/mtr-MIR2600a-p5_2ss6GC18CA_rna-HHC036511.1_2274_TPlot.pdf
MSTRG.10515.2:587	bdi-miR399d	MSTRG.10515.2	MSTRG.10515	HHC009262	LOW QUALITY PROTEIN: probable ubiquitin-conjugating enzyme E2 24 [Asparagus officinalis]	GO:0005737(cytoplasm);GO:0031625(ubiquitin protein ligase binding);GO:0061630(ubiquitin protein ligase activity)	ko04120(Ubiquitin mediated proteolysis)	576	596	587	0.978102	0.5	(((((((((((((((((((((&)))))))))))))))))))))	CUGGGCAAAUCUCCUUUGGCA&UGCCAAAGGAGAUUUGCCCGG	3	87.7783	2	0.0254127	Output/hfu/cleaveLand_result/t_plot/bdi-miR399d_MSTRG.10515.2_587_TPlot.pdf
MSTRG.2099.1:316	osa-miR399j	MSTRG.2099.1	MSTRG.2099	HHC002758	LOW QUALITY PROTEIN: probable ubiquitin-conjugating enzyme E2 24 [Asparagus officinalis]	GO:0005737(cytoplasm);GO:0031625(ubiquitin protein ligase binding);GO:0061630(ubiquitin protein ligase activity)	ko04120(Ubiquitin mediated proteolysis)	305	325	316	0.977833	2	..(((((((((((((((((((&)))))))))))))))))))..	UUGGGCAACUCUCCUUUGGCA&UGCCAAAGGAGAGUUGCCCUA	3	87.7783	2	0.0127881	Output/hfu/cleaveLand_result/t_plot/osa-miR399j_MSTRG.2099.1_316_TPlot.pdf
MSTRG.29491.1:231	gma-MIR5368-p5_2ss14GA18AG_1	MSTRG.29491.1	MSTRG.29491	NA	NA	NA	NA	220	240	231	1	0	(((((((((((((((((((((&)))))))))))))))))))))	CUUCGCCUUCCACCUAAGCUG&CAGCUUAGGUGGAAGGCGAAG	2	58.5189	2	0.0254127	Output/hfu/cleaveLand_result/t_plot/gma-MIR5368-p5_2ss14GA18AG_1_MSTRG.29491.1_231_TPlot.pdf
MSTRG.29491.2:1150	gma-MIR5368-p5_2ss14GA18AG_2	MSTRG.29491.2	MSTRG.29491	NA	NA	NA	NA	1137	1159	1150	1	0	(((((((((((((((((((((((&)))))))))))))))))))))))	UUCUUCGCCUUCCACCUAAGCUG&CAGCUUAGGUGGAAGGCGAAGAA	4	117.038	2	0.0378758	Output/hfu/cleaveLand_result/t_plot/gma-MIR5368-p5_2ss14GA18AG_2_MSTRG.29491.2_1150_TPlot.pdf
MSTRG.29491.1:177	gma-MIR5368-p5_2ss1AT18CA	MSTRG.29491.1	MSTRG.29491	NA	NA	NA	NA	168	186	177	1	0	(((((((((((((((((((&)))))))))))))))))))	CUUCCAGAGUGGUAUCUCA&UGAGAUACCACUCUGGAAG	3	87.7783	2	0.0378758	Output/hfu/cleaveLand_result/t_plot/gma-MIR5368-p5_2ss1AT18CA_MSTRG.29491.1_177_TPlot.pdf
rna-HHC011817.1:190	PC-3p-56030_46	rna-HHC011817.1	MSTRG.12362	HHC011817	NA	NA	NA	178	199	190	0.874384	4	(((((((.((((((((((((((&))))))))))))))-)))))))	UGUGGGGAGGGGGAUACGGAGG&CCUCUGUAUUCCUC-CUCCACA	10	292.594	2	0.0254127	Output/hfu/cleaveLand_result/t_plot/PC-3p-56030_46_rna-HHC011817.1_190_TPlot.pdf
rna-HHC033571.1:1003	PC-5p-120381_17	rna-HHC033571.1	gene-HHC033571	HHC033571	NA	NA	NA	990	1012	1003	0.747801	7	((((..(((((((((((((((..&..)))))))))))))))..))))	UUUGCUGGACCGAGUUGGUUUGU&AAAAACUAACUCGGUCUUUCGAA	2	58.5189	2	0.0127881	Output/hfu/cleaveLand_result/t_plot/PC-5p-120381_17_rna-HHC033571.1_1003_TPlot.pdf
MSTRG.219.1:294	PC-5p-208600_7	MSTRG.219.1	MSTRG.219	NA	NA	NA	NA	280	303	294	0.803191	5.5	.((((((((.((((((((((((((&)))))))))))))).)))))))).	UGUAGUGGAAUUGGUAGUGGGUGU&ACAUCUACUAUCAAAUCUACUACC	5	146.297	2	0.0254127	Output/hfu/cleaveLand_result/t_plot/PC-5p-208600_7_MSTRG.219.1_294_TPlot.pdf
MSTRG.219.2:294	PC-5p-208600_7	MSTRG.219.2	MSTRG.219	NA	NA	NA	NA	280	303	294	0.803191	5.5	.((((((((.((((((((((((((&)))))))))))))).)))))))).	UGUAGUGGAAUUGGUAGUGGGUGU&ACAUCUACUAUCAAAUCUACUACC	2	58.5189	2	0.0378758	Output/hfu/cleaveLand_result/t_plot/PC-5p-208600_7_MSTRG.219.2_294_TPlot.pdf
rna-HHC032239.1:887	ptc-MIR156j-p3	rna-HHC032239.1	gene-HHC032239	HHC032239	pentatricopeptide repeat-containing protein At1g73400, mitochondrial-like isoform X1 [Phoenix dactylifera]	NA	NA	876	895	887	0.868766	4	(((((((((((((-(((((((&))))))).)))))))))))))	GGUGGCAGAGGCA-AGAGAGC&GCUCUCUAUGCUUCUGUCAUC	2	58.5189	2	0.0254127	Output/hfu/cleaveLand_result/t_plot/ptc-MIR156j-p3_rna-HHC032239.1_887_TPlot.pdf
MSTRG.28316.2:2646	PC-3p-304865_5	MSTRG.28316.2	MSTRG.28316	HHC035637	protein PLASTID MOVEMENT IMPAIRED 1 [Phoenix dactylifera]	GO:0005622(intracellular);GO:0005623(cell);GO:0005829(cytosol);GO:0005886(plasma membrane);GO:0006970(response to osmotic stress);GO:0009507(chloroplast);GO:0009637(response to blue light);GO:0009738(abscisic acid-activated signaling pathway);GO:0009787(regulation of abscisic acid-activated signaling pathway);GO:0009902(chloroplast relocation);GO:0009903(chloroplast avoidance movement);GO:0010029…	NA	2632	2655	2646	0.726542	5	(((((((((..(((((((.((((.&.)))).)))))))..)))))))))	UCUUCACUACCUUAGGUGGCACAC&AUGUGACACCUAAAAUAGUGAAGA	5	146.297	2	0.0378758	Output/hfu/cleaveLand_result/t_plot/PC-3p-304865_5_MSTRG.28316.2_2646_TPlot.pdf
rna-HHC035027.1:2055	ptc-MIR156j-p3	rna-HHC035027.1	MSTRG.27855	HHC035027	pumilio homolog 5 [Asparagus officinalis]	GO:0003723(RNA binding);GO:0003727(single-stranded RNA binding);GO:0003729(mRNA binding);GO:0005737(cytoplasm);GO:0005773(vacuole);GO:0005829(cytosol);GO:0006970(response to osmotic stress);GO:0009651(response to salt stress);GO:0009819(drought recovery);GO:0051607(defense response to virus);GO:0061158(3'-UTR-mediated mRNA destabilization)	NA	2044	2064	2055	0.868766	5	((((((((((((((.((((((&)))))).))))))))))))))	GAUGGCAGGGGCAUCGAGGGC&GCUCUCUAUGCUUCUGUCAUC	4	117.038	2	0.0127881	Output/hfu/cleaveLand_result/t_plot/ptc-MIR156j-p3_rna-HHC035027.1_2055_TPlot.pdf
rna-HHC020999.1:728	ath-miR170-3p	rna-HHC020999.1	MSTRG.18726	HHC020999	scarecrow-like protein 6, partial [Asparagus officinalis]	GO:0003700(DNA binding transcription factor activity);GO:0005634(nucleus);GO:0006355(regulation of transcription, DNA-templated);GO:0030154(cell differentiation);GO:0043565(sequence-specific DNA binding)	ko04075(Plant hormone signal transduction)	717	737	728	1	1.5	(((((((((((((((((((((&)))))))))))))))))))))	GAUAUUGGCGCGGCUCAAUCA&UGAUUGAGCCGUGUCAAUAUC	2	58.5189	2	0.0378758	Output/hfu/cleaveLand_result/t_plot/ath-miR170-3p_rna-HHC020999.1_728_TPlot.pdf
rna-HHC018925.3:1843	cpa-miR156a	rna-HHC018925.3	MSTRG.17408	HHC018925	squamosa promoter-binding-like protein 12 [Asparagus officinalis]	GO:0003677(DNA binding);GO:0003700(DNA binding transcription factor activity);GO:0005634(nucleus);GO:0006351(transcription, DNA-templated);GO:0006355(regulation of transcription, DNA-templated);GO:0043565(sequence-specific DNA binding);GO:0044212(transcription regulatory region DNA binding);GO:0046872(metal ion binding);GO:0048510(regulation of timing of transition from vegetative to reproductive…	ko04075(Plant hormone signal transduction)	1833	1852	1843	0.938172	1	((((((.(((((((((((((&))))))))))))).))))))	GUGCUCUCUCUCUUCUGUCA&UGACAGAAGAGAGUGAGCAC	4	117.038	2	0.0378758	Output/hfu/cleaveLand_result/t_plot/cpa-miR156a_rna-HHC018925.3_1843_TPlot.pdf
MSTRG.20428.1:1867	ptc-miR156g	MSTRG.20428.1	MSTRG.20428	HHC023313	squamosa promoter-binding-like protein 12 [Asparagus officinalis]	GO:0003677(DNA binding);GO:0003700(DNA binding transcription factor activity);GO:0005634(nucleus);GO:0006351(transcription, DNA-templated);GO:0006355(regulation of transcription, DNA-templated);GO:0043565(sequence-specific DNA binding);GO:0044212(transcription regulatory region DNA binding);GO:0046872(metal ion binding);GO:0048510(regulation of timing of transition from vegetative to reproductive…	ko04075(Plant hormone signal transduction)	1856	1876	1867	0.92562	2	(((((((((.(((((((((((&))))))))))).)))))))))	GUGCUCUCUCUCUUCUGUCAA&UUGACAGAAGAUAGAGAGCAC	3	87.7783	2	0.0127881	Output/hfu/cleaveLand_result/t_plot/ptc-miR156g_MSTRG.20428.1_1867_TPlot.pdf
rna-HHC016666.1:600	aof-miR156c	rna-HHC016666.1	MSTRG.15757	HHC016666	squamosa promoter-binding-like protein 7 [Phoenix dactylifera]	GO:0003677(DNA binding);GO:0003700(DNA binding transcription factor activity);GO:0005634(nucleus);GO:0006351(transcription, DNA-templated);GO:0006355(regulation of transcription, DNA-templated);GO:0046872(metal ion binding)	NA	590	609	600	1	0	((((((((((((((((((((&))))))))))))))))))))	GUGCUCUCUCUCUUCUGUCA&UGACAGAAGAGAGAGAGCAC	4	117.038	2	0.0378758	Output/hfu/cleaveLand_result/t_plot/aof-miR156c_rna-HHC016666.1_600_TPlot.pdf
MSTRG.16323.3:412	zma-miR156i-3p	MSTRG.16323.3	MSTRG.16323	HHC017393	thioredoxin-like protein CXXS1 [Asparagus officinalis]	GO:0000103(sulfate assimilation);GO:0005829(cytosol);GO:0005886(plasma membrane);GO:0006457(protein folding);GO:0015035(protein disulfide oxidoreductase activity);GO:0016671(oxidoreductase activity, acting on a sulfur group of donors, disulfide as acceptor);GO:0034599(cellular response to oxidative stress);GO:0045454(cell redox homeostasis);GO:0055114(oxidation-reduction process)	NA	400	421	412	0.840964	2.5	(((((.((((((((((((((((&)))))))))))))))).)))))	GAUGAAAGAUGGAGCAGUGAGU&GCUCACUGCUCUAUCUGUCAUC	2	58.5189	2	0.0378758	Output/hfu/cleaveLand_result/t_plot/zma-miR156i-3p_MSTRG.16323.3_412_TPlot.pdf
rna-HHC005204.1:1097	osa-miR159d_R-1_1ss1AG	rna-HHC005204.1	gene-HHC005204	HHC005204	transcription factor GAMYB-like [Asparagus officinalis]	GO:0000981(RNA polymerase II transcription factor activity, sequence-specific DNA binding);GO:0001135(transcription factor activity, RNA polymerase II transcription factor recruiting);GO:0003677(DNA binding);GO:0003700(DNA binding transcription factor activity);GO:0005634(nucleus);GO:0006351(transcription, DNA-templated);GO:0006355(regulation of transcription, DNA-templated);GO:0006357(regulation…	NA	1087	1106	1097	0.914508	2.5	(((((((((((((.((((((&)))))).)))))))))))))	GGAGCUCCCUUCACUCCAAU&GUUGGAUUGAAGGGAGCUCC	2	58.5189	2	0.0254127	Output/hfu/cleaveLand_result/t_plot/osa-miR159d_R-1_1ss1AG_rna-HHC005204.1_1097_TPlot.pdf
rna-HHC033608.1:1728	osa-miR319a-3p.2-3p_R+1	rna-HHC033608.1	MSTRG.27008	HHC033608	transcription factor TCP2 [Asparagus officinalis]	GO:0003677(DNA binding);GO:0003700(DNA binding transcription factor activity);GO:0005515(protein binding);GO:0005634(nucleus);GO:0006351(transcription, DNA-templated);GO:0006355(regulation of transcription, DNA-templated);GO:0009637(response to blue light);GO:0009965(leaf morphogenesis);GO:0030154(cell differentiation);GO:0045962(positive regulation of development, heterochronic);GO:0048366(leaf …	NA	1718	1737	1728	0.84186	1.5	((((((-((((((((((((((&)))))))))))))).))))))	AGGGGG-ACCCUUCAGUCCAA&UUGGACUGAAGGGUGCUCCCU	2	58.5189	2	0.0127881	Output/hfu/cleaveLand_result/t_plot/osa-miR319a-3p.2-3p_R+1_rna-HHC033608.1_1728_TPlot.pdf
MSTRG.21339.1:1702	aof-miR393a_L+1R-5	MSTRG.21339.1	MSTRG.21339	HHC024872	transport inhibitor response 1-like protein Os04g0395600 [Asparagus officinalis]	GO:0000822(inositol hexakisphosphate binding);GO:0009734(auxin-activated signaling pathway);GO:0010011(auxin binding);GO:0019005(SCF ubiquitin ligase complex)	ko04075(Plant hormone signal transduction)	1694	1711	1702	1	1	(((((((((((((((((.&.)))))))))))))))))	AAUGCGAUCCCUUUGGAU&UUCCAAAGGGAUCGCAUU	20	585.189	2	0.0254127	Output/hfu/cleaveLand_result/t_plot/aof-miR393a_L+1R-5_MSTRG.21339.1_1702_TPlot.pdf
rna-HHC020574.2:1772	aof-miR393b_L+1R-1	rna-HHC020574.2	MSTRG.18392	HHC020574	transport inhibitor response 1-like protein Os04g0395600 [Asparagus officinalis]	GO:0000822(inositol hexakisphosphate binding);GO:0009734(auxin-activated signaling pathway)	ko04075(Plant hormone signal transduction)	1760	1781	1772	0.937662	2	.((((((((((((((((((((.&.)))))))))))))))))))).	AAUCAAUGCGAUCCCUUUGGAU&UUCCAAAGGGAUCGCAUUGAUC	58	1697.05	2	0.0378758	Output/hfu/cleaveLand_result/t_plot/aof-miR393b_L+1R-1_rna-HHC020574.2_1772_TPlot.pdf
rna-HHC020574.3:1756	aof-miR393b_L+1R-1	rna-HHC020574.3	MSTRG.18392	HHC020574	transport inhibitor response 1-like protein Os04g0395600 [Asparagus officinalis]	GO:0000822(inositol hexakisphosphate binding);GO:0009734(auxin-activated signaling pathway)	ko04075(Plant hormone signal transduction)	1744	1765	1756	0.937662	2	.((((((((((((((((((((.&.)))))))))))))))))))).	AAUCAAUGCGAUCCCUUUGGAU&UUCCAAAGGGAUCGCAUUGAUC	48	1404.45	2	0.0127881	Output/hfu/cleaveLand_result/t_plot/aof-miR393b_L+1R-1_rna-HHC020574.3_1756_TPlot.pdf
rna-HHC020574.1:1602	aof-miR393b_L+1R-1	rna-HHC020574.1	MSTRG.18392	HHC020574	transport inhibitor response 1-like protein Os04g0395600 [Asparagus officinalis]	GO:0000822(inositol hexakisphosphate binding);GO:0009734(auxin-activated signaling pathway)	ko04075(Plant hormone signal transduction)	1590	1611	1602	0.937662	2	.((((((((((((((((((((.&.)))))))))))))))))))).	AAUCAAUGCGAUCCCUUUGGAU&UUCCAAAGGGAUCGCAUUGAUC	43	1258.16	2	0.0254127	Output/hfu/cleaveLand_result/t_plot/aof-miR393b_L+1R-1_rna-HHC020574.1_1602_TPlot.pdf
rna-HHC006849.1:1617	aof-miR393a_L+1R-5	rna-HHC006849.1	MSTRG.9175	HHC006849	transport inhibitor response 1-like protein Os05g0150500 [Phoenix dactylifera]	GO:0000822(inositol hexakisphosphate binding);GO:0009734(auxin-activated signaling pathway)	ko04075(Plant hormone signal transduction)	1609	1626	1617	1	1	(((((((((((((((((.&.)))))))))))))))))	AAUGCGAUCCCUUUGGAU&UUCCAAAGGGAUCGCAUU	44	1287.42	2	0.0378758	Output/hfu/cleaveLand_result/t_plot/aof-miR393a_L+1R-5_rna-HHC006849.1_1617_TPlot.pdf
rna-HHC039275.1:454	aof-miR477a_1ss21GA	rna-HHC039275.1	gene-HHC039275	HHC039275	uncharacterized protein A4U43_C04F16720 [Asparagus officinalis]	GO:0003689(DNA clamp loader activity);GO:0005663(DNA replication factor C complex);GO:0006261(DNA-dependent DNA replication)	ko03030(DNA replication);ko03420(Nucleotide excision repair);ko03430(Mismatch repair)	443	463	454	1	1	.((((((((((((((((((((&)))))))))))))))))))).	AGGAAGCCCUUGAGGGAGAGU&ACUCUCCCUCAAGGGCUUCCA	2	58.5189	2	0.0254127	Output/hfu/cleaveLand_result/t_plot/aof-miR477a_1ss21GA_rna-HHC039275.1_454_TPlot.pdf
MSTRG.28861.3:198	aof-miR536_1ss15GT	MSTRG.28861.3	MSTRG.28861	HHC036445	uncharacterized protein A4U43_C04F2550 [Asparagus officinalis]	NA	NA	187	207	198	0.957143	1.5	((((((.((((((((((((((&)))))))))))))).))))))	GACGCACGCAGCGUGGCACGA&UCGUGCCACGCUGUUUGCGUC	2	58.5189	2	0.0127881	Output/hfu/cleaveLand_result/t_plot/aof-miR536_1ss15GT_MSTRG.28861.3_198_TPlot.pdf
rna-HHC037242.1:1593	aof-miR172	rna-HHC037242.1	MSTRG.29446	HHC037242	uncharacterized protein A4U43_C07F3620 [Asparagus officinalis]	GO:0003677(DNA binding);GO:0003700(DNA binding transcription factor activity);GO:0005634(nucleus);GO:0006351(transcription, DNA-templated);GO:0006355(regulation of transcription, DNA-templated);GO:0009908(flower development);GO:0010073(meristem maintenance);GO:0010093(specification of floral organ identity);GO:0019953(sexual reproduction);GO:0030154(cell differentiation);GO:0048316(seed developme…	NA	1582	1602	1593	0.997085	2	.((((((((((((((((((((&)))))))))))))))))))).	CUGCAGCAUCAUCAGGAUUCU&AGAAUCUUGAUGAUGCUGCAU	11	321.854	2	0.0378758	Output/hfu/cleaveLand_result/t_plot/aof-miR172_rna-HHC037242.1_1593_TPlot.pdf
rna-HHC016462.1:1132	ath-miR170-3p	rna-HHC016462.1	MSTRG.15590	HHC016462	uncharacterized protein A4U43_C10F210 [Asparagus officinalis]	GO:0003700(DNA binding transcription factor activity);GO:0005634(nucleus);GO:0006355(regulation of transcription, DNA-templated);GO:0030154(cell differentiation);GO:0043565(sequence-specific DNA binding)	ko04075(Plant hormone signal transduction)	1121	1141	1132	1	1.5	(((((((((((((((((((((&)))))))))))))))))))))	GAUAUUGGCGCGGCUCAAUCA&UGAUUGAGCCGUGUCAAUAUC	17	497.411	2	0.0127881	Output/hfu/cleaveLand_result/t_plot/ath-miR170-3p_rna-HHC016462.1_1132_TPlot.pdf
rna-HHC052041.1:245	ath-miR170-3p	rna-HHC052041.1	MSTRG.33125	HHC052041	uncharacterized protein A4U43_C10F210 [Asparagus officinalis]	GO:0003700(DNA binding transcription factor activity);GO:0005634(nucleus);GO:0006355(regulation of transcription, DNA-templated);GO:0030154(cell differentiation);GO:0043565(sequence-specific DNA binding)	ko04075(Plant hormone signal transduction)	234	254	245	1	1.5	(((((((((((((((((((((&)))))))))))))))))))))	GAUAUUGGCGCGGCUCAAUCA&UGAUUGAGCCGUGUCAAUAUC	13	380.373	2	0.0254127	Output/hfu/cleaveLand_result/t_plot/ath-miR170-3p_rna-HHC052041.1_245_TPlot.pdf
rna-HHC051818.1:421	gma-miR6300_L-1R+6	rna-HHC051818.1	MSTRG.35005	HHC051818	40S ribosomal protein S19-like [Ananas comosus]	GO:0000028(ribosomal small subunit assembly);GO:0003735(structural constituent of ribosome);GO:0022627(cytosolic small ribosomal subunit)	ko03010(Ribosome)	409	430	421	0.752604	7	(((((((((-(((((((((((..&..))))))))))).)))))))))	UGCUCGCCA-UAUACUGCAGCAA&UCGUUGUAGUAUAGUGGUGAGUA	2	58.5189	3	0.0314335	Output/hfu/cleaveLand_result/t_plot/gma-miR6300_L-1R+6_rna-HHC051818.1_421_TPlot.pdf
rna-HHC045163.1:414	gma-miR6300_L-1R+6	rna-HHC045163.1	MSTRG.7449	HHC045163	40S ribosomal protein S19-like [Ananas comosus]	GO:0000028(ribosomal small subunit assembly);GO:0003735(structural constituent of ribosome);GO:0022627(cytosolic small ribosomal subunit)	ko03010(Ribosome)	402	423	414	0.752604	7	(((((((((-(((((((((((..&..))))))))))).)))))))))	UGCUCGCCA-UAUACUGCAGCAA&UCGUUGUAGUAUAGUGGUGAGUA	2	58.5189	3	0.0358426	Output/hfu/cleaveLand_result/t_plot/gma-miR6300_L-1R+6_rna-HHC045163.1_414_TPlot.pdf
rna-HHC045163.1:413	gma-MIR6300-p5_1ss18AG_2	rna-HHC045163.1	MSTRG.7449	HHC045163	40S ribosomal protein S19-like [Ananas comosus]	GO:0000028(ribosomal small subunit assembly);GO:0003735(structural constituent of ribosome);GO:0022627(cytosolic small ribosomal subunit)	ko03010(Ribosome)	400	422	413	0.753247	7	..(((((((((-(((((((((((.&.))))))))))).)))))))))..	AUUGCUCGCCA-UAUACUGCAGCA&CGUUGUAGUAUAGUGGUGAGUAUU	2	58.5189	3	0.00908367	Output/hfu/cleaveLand_result/t_plot/gma-MIR6300-p5_1ss18AG_2_rna-HHC045163.1_413_TPlot.pdf
rna-HHC011234.4:176	PC-3p-100300_22	rna-HHC011234.4	MSTRG.11891	HHC011234	dormancy-associated protein homolog 3-like isoform X1 [Phoenix dactylifera];PREDICTED: dormancy-associated protein homolog 3 [Elaeis guineensis];dormancy-associated protein homolog 3 isoform X1 [Dendrobium catenatum]	GO:0003674(molecular_function);GO:0005634(nucleus)	NA	162	185	176	0.823383	6	((((((((..((((((((((((((&))))))))))))))--))))))))	CAUGGCGGUGGUGGAGCCGAAGGU&GCUUUCGGCUCUAU--CUGUCAUG	5	146.297	3	0.0358426	Output/hfu/cleaveLand_result/t_plot/PC-3p-100300_22_rna-HHC011234.4_176_TPlot.pdf
rna-HHC011234.1:176	PC-3p-100300_22	rna-HHC011234.1	MSTRG.11891	HHC011234	dormancy-associated protein homolog 3-like isoform X1 [Phoenix dactylifera];PREDICTED: dormancy-associated protein homolog 3 [Elaeis guineensis];dormancy-associated protein homolog 3 isoform X1 [Dendrobium catenatum]	GO:0003674(molecular_function);GO:0005634(nucleus)	NA	162	185	176	0.823383	6	((((((((..((((((((((((((&))))))))))))))--))))))))	CAUGGCGGUGGUGGAGCCGAAGGU&GCUUUCGGCUCUAU--CUGUCAUG	4	117.038	3	0.0446007	Output/hfu/cleaveLand_result/t_plot/PC-3p-100300_22_rna-HHC011234.1_176_TPlot.pdf
rna-HHC011234.5:168	PC-3p-100300_22	rna-HHC011234.5	MSTRG.11891	HHC011234	dormancy-associated protein homolog 3-like isoform X1 [Phoenix dactylifera];PREDICTED: dormancy-associated protein homolog 3 [Elaeis guineensis];dormancy-associated protein homolog 3 isoform X1 [Dendrobium catenatum]	GO:0003674(molecular_function);GO:0005634(nucleus)	NA	154	177	168	0.823383	6	((((((((..((((((((((((((&))))))))))))))--))))))))	CAUGGCGGUGGUGGAGCCGAAGGU&GCUUUCGGCUCUAU--CUGUCAUG	2	58.5189	3	0.0314335	Output/hfu/cleaveLand_result/t_plot/PC-3p-100300_22_rna-HHC011234.5_168_TPlot.pdf
rna-HHC029102.1:1330	PC-5p-13637_215	rna-HHC029102.1	MSTRG.24136	HHC029102	fructose-bisphosphate aldolase, chloroplastic [Asparagus officinalis]	GO:0004332(fructose-bisphosphate aldolase activity);GO:0005737(cytoplasm)	ko00010(Glycolysis / Gluconeogenesis);ko00030(Pentose phosphate pathway);ko00051(Fructose and mannose metabolism);ko00710(Carbon fixation in photosynthetic organisms)	1319	1339	1330	0.908616	4	((..(((((((((((((((((&)))))))))))))))))..))	GGGGAGGAAGGGGAAGGCAGA&UCUGUCUUCUCCUUCCUAACC	3	87.7783	3	0.0180848	Output/hfu/cleaveLand_result/t_plot/PC-5p-13637_215_rna-HHC029102.1_1330_TPlot.pdf
rna-HHC053992.1:403	PC-5p-69667_35	rna-HHC053992.1	MSTRG.32237	HHC053992	hypothetical protein CKAN_02569300 [Cinnamomum micranthum f. kanehirae]	GO:0003674(molecular_function);GO:0005634(nucleus);GO:0008150(biological_process)	NA	390	412	403	0.798956	6	(((((..(((((((((((((((.&.)))))))))))))))-.)))))	GUUCGAGGAGCUGAAGGGGUUCA&AGAAUCCCUUCGGUUC-AUGAAC	2	58.5189	3	0.0225547	Output/hfu/cleaveLand_result/t_plot/PC-5p-69667_35_rna-HHC053992.1_403_TPlot.pdf
rna-HHC001585.1:416	PC-5p-43974_62	rna-HHC001585.1	MSTRG.1257	HHC001585	LOW QUALITY PROTEIN: guanine nucleotide-binding protein subunit beta-like protein [Asparagus officinalis]	GO:0005515(protein binding);GO:0005737(cytoplasm);GO:0005886(plasma membrane);GO:0050832(defense response to fungus);GO:0060267(positive regulation of respiratory burst)	NA	403	424	416	0.672199	7	((((-(..((((((((((((-((.&.)).))))))))))))..).))))	GGUC-CUGUCGUCGGAUGGC-CAG&AUGUGCCGUCCGACGAAUGAGACC	3	87.7783	3	0.0270042	Output/hfu/cleaveLand_result/t_plot/PC-5p-43974_62_rna-HHC001585.1_416_TPlot.pdf
MSTRG.7694.1:168	gma-MIR5368-p3_1ss17CA	MSTRG.7694.1	MSTRG.7694	NA	NA	NA	NA	160	177	168	0.978395	1	((((((((((((((((((&))))))))))))))))))	CUUCCAGAGUGGUAUUUC&GAGAUACCACUCUGGAAG	2	58.5189	3	0.0180848	Output/hfu/cleaveLand_result/t_plot/gma-MIR5368-p3_1ss17CA_MSTRG.7694.1_168_TPlot.pdf
MSTRG.7694.1:169	gma-MIR5368-p3_2ss1AT18CA	MSTRG.7694.1	MSTRG.7694	NA	NA	NA	NA	160	178	169	0.955882	1	(((((((((((((((((((&)))))))))))))))))))	CUUCCAGAGUGGUAUUUCA&UGAGAUACCACUCUGGAAG	3	87.7783	3	0.0180848	Output/hfu/cleaveLand_result/t_plot/gma-MIR5368-p3_2ss1AT18CA_MSTRG.7694.1_169_TPlot.pdf
MSTRG.21379.1:530	gma-MIR5368-p5_1ss13CT	MSTRG.21379.1	MSTRG.21379	NA	NA	NA	NA	522	539	530	1	0	((((((((((((((((((&))))))))))))))))))	UCCUGACACAAGGUUAGA&UCUAACCUUGUGUCAGGA	2	58.5189	3	0.00908367	Output/hfu/cleaveLand_result/t_plot/gma-MIR5368-p5_1ss13CT_MSTRG.21379.1_530_TPlot.pdf
MSTRG.20024.1:353	PC-5p-31534_90	MSTRG.20024.1	MSTRG.20024	NA	NA	NA	NA	341	362	353	0.861048	3.5	(.(((((((((((((((((((.&.))))))))))))))))))).)	AGUGCGGAUCCAACUGCACCUG&UGGGUGCAGUUGGAUCUGCAGU	41	1199.64	3	0.0180848	Output/hfu/cleaveLand_result/t_plot/PC-5p-31534_90_MSTRG.20024.1_353_TPlot.pdf
rna-HHC021286.1:604	aof-miR408_R+1	rna-HHC021286.1	MSTRG.18948	HHC021286	PREDICTED: blue copper protein-like [Elaeis guineensis]	GO:0046658(anchored component of plasma membrane)	NA	592	613	604	0.823913	3	((((((((.(((((((((((((&))))))))))))).))))))))	GGGCUAGGAGAGAGGCAGUGCA&UGCACUGCCUCUUCCCUGGCUU	2	58.5189	3	0.0314335	Output/hfu/cleaveLand_result/t_plot/aof-miR408_R+1_rna-HHC021286.1_604_TPlot.pdf
rna-HHC017241.1:1426	aof-miR159_1ss20TC	rna-HHC017241.1	MSTRG.16197	HHC017241	PREDICTED: pyrophosphate--fructose 6-phosphate 1-phosphotransferase subunit beta-like [Elaeis guineensis];pyrophosphate--fructose 6-phosphate 1-phosphotransferase subunit beta 1, partial [Asparagus officinalis];pyrophosphate--fructose 6-phosphate 1-phosphotransferase subunit beta-like [Asparagus officinalis]	GO:0003872(6-phosphofructokinase activity);GO:0005524(ATP binding);GO:0005618(cell wall);GO:0005737(cytoplasm);GO:0005829(cytosol);GO:0006002(fructose 6-phosphate metabolic process);GO:0006096(glycolytic process);GO:0009735(response to cytokinin);GO:0009749(response to glucose);GO:0010318(pyrophosphate-dependent phosphofructokinase complex, beta-subunit complex);GO:0015979(photosynthesis);GO:0016…	ko00010(Glycolysis / Gluconeogenesis);ko00030(Pentose phosphate pathway);ko00051(Fructose and mannose metabolism)	1414	1435	1426	0.807792	6	((((((((.((((((.(((((.&.))))).))))))-))))))))	UGGAGCUCUCCUUCAUUCCGGG&UUUGGAUUGAAGG-GAGCUCCA	2	58.5189	3	0.0446007	Output/hfu/cleaveLand_result/t_plot/aof-miR159_1ss20TC_rna-HHC017241.1_1426_TPlot.pdf
rna-HHC011314.1:702	PC-5p-53154_49	rna-HHC011314.1	MSTRG.11949	HHC011314	PREDICTED: U-box domain-containing protein 34 [Elaeis guineensis]	GO:0005634(nucleus);GO:0005774(vacuolar membrane);GO:0005886(plasma membrane);GO:0009507(chloroplast);GO:0016020(membrane)	NA	693	711	702	0.890449	5	..(((((((((((((((((&)))))))))))))))))..	GUGGGUGGUUGGGGGGAGC&GUUCCUCCCAACCACUUCA	7	204.816	3	0.0314335	Output/hfu/cleaveLand_result/t_plot/PC-5p-53154_49_rna-HHC011314.1_702_TPlot.pdf
rna-HHC014255.1:1016	aof-MIR479-p5_2ss12TG22TG	rna-HHC014255.1	MSTRG.13919	HHC014255	PREDICTED: UDP-glucuronate 4-epimerase 6 [Vitis vinifera];UDP-D-glucuronic acid 4-epimerase 2 [Ornithogalum longebracteatum]	GO:0003824(catalytic activity);GO:0005515(protein binding);GO:0005768(endosome);GO:0005794(Golgi apparatus);GO:0005802(trans-Golgi network);GO:0009225(nucleotide-sugar metabolic process);GO:0016021(integral component of membrane);GO:0032580(Golgi cisterna membrane);GO:0033481(galacturonate biosynthetic process);GO:0050378(UDP-glucuronate 4-epimerase activity);GO:0050829(defense response to Gram-n…	ko00520(Amino sugar and nucleotide sugar metabolism)	1003	1025	1016	0.798595	6.5	(((.(((((((((((((((.((.&.)).)))))))))))))))-)))	CAUGGGGCCGACCCGACAUGGCC&UGUGAUGUUGGGUCGGCUC-AUG	3	87.7783	3	0.0135945	Output/hfu/cleaveLand_result/t_plot/aof-MIR479-p5_2ss12TG22TG_rna-HHC014255.1_1016_TPlot.pdf
rna-HHC051134.1:563	PC-3p-25651_112	rna-HHC051134.1	MSTRG.34914	HHC051134	ribulose bisphosphate carboxylase small chain, chloroplastic-like [Asparagus officinalis]	GO:0004497(monooxygenase activity);GO:0009507(chloroplast);GO:0009570(chloroplast stroma);GO:0009573(chloroplast ribulose bisphosphate carboxylase complex);GO:0009579(thylakoid);GO:0009637(response to blue light);GO:0009853(photorespiration);GO:0009941(chloroplast envelope);GO:0010114(response to red light);GO:0010218(response to far red light);GO:0015977(carbon fixation);GO:0016020(membrane);GO:…	ko00630(Glyoxylate and dicarboxylate metabolism);ko00710(Carbon fixation in photosynthetic organisms)	552	572	563	0.720635	7	.((((((((((((((.((.(.&.).)).)))))))))))))).	CACCUAGAUCGUUGUGCUGAU&UUGAGAAUAACGAUCUAGGUU	8	234.076	3	0.0314335	Output/hfu/cleaveLand_result/t_plot/PC-3p-25651_112_rna-HHC051134.1_563_TPlot.pdf
rna-HHC018000.1:691	osa-miR5072_L-4	rna-HHC018000.1	MSTRG.16741	HHC018000	short-chain dehydrogenase reductase 3b-like [Phoenix dactylifera]	GO:0005737(cytoplasm);GO:0009626(plant-type hypersensitive response);GO:0009688(abscisic acid biosynthetic process);GO:0016491(oxidoreductase activity);GO:0042742(defense response to bacterium);GO:0055114(oxidation-reduction process)	ko00904(Diterpenoid biosynthesis)	683	700	691	0.877451	3	(((((((.(((((((((.&.))))))))).)))))))	UGGCGACGCCGCUGGGGU&UCCCCAGCGGAGUCGCCA	2	58.5189	3	0.0045522	Output/hfu/cleaveLand_result/t_plot/osa-miR5072_L-4_rna-HHC018000.1_691_TPlot.pdf
rna-HHC043669.1:491	gma-MIR10423-p3_1ss3AC	rna-HHC043669.1	MSTRG.6310	HHC043669	trans-resveratrol di-O-methyltransferase-like isoform X2 [Asparagus officinalis]	GO:0008171(O-methyltransferase activity);GO:0008757(S-adenosylmethionine-dependent methyltransferase activity);GO:0019438(aromatic compound biosynthetic process)	ko00945(Stilbenoid, diarylheptanoid and gingerol biosynthesis)	483	501	491	0.886667	4	.((((((((((.(((((((&)))))))-)))))))))).	CGGUGCUUUCAUUUGGGAG&CUCUCAA-UGAAAGCACCA	4	117.038	3	0.0270042	Output/hfu/cleaveLand_result/t_plot/gma-MIR10423-p3_1ss3AC_rna-HHC043669.1_491_TPlot.pdf
rna-HHC052041.1:241	aof-miR171b_L-1R+2_1ss9CT	rna-HHC052041.1	MSTRG.33125	HHC052041	uncharacterized protein A4U43_C10F210 [Asparagus officinalis]	GO:0003700(DNA binding transcription factor activity);GO:0005634(nucleus);GO:0006355(regulation of transcription, DNA-templated);GO:0030154(cell differentiation);GO:0043565(sequence-specific DNA binding)	ko04075(Plant hormone signal transduction)	229	250	241	0.763341	6	.....(((((((((((((((((&))))))))))))))))).....	CGUGAGAUAUUGGCGCGGCUCA&UGAGCCGUGCCAAUAUCACUCC	2	58.5189	3	0.0225547	Output/hfu/cleaveLand_result/t_plot/aof-miR171b_L-1R+2_1ss9CT_rna-HHC052041.1_241_TPlot.pdf
rna-HHC035018.1:129	PC-5p-168795_10	rna-HHC035018.1	MSTRG.27848	HHC035018	uncharacterized protein LOC109845103 [Asparagus officinalis]	NA	NA	118	138	129	0.786164	6	(((((((((((((((((((((&)))))))))))))))))))))	GAGGGAGAUUGCGUUGGUUUG&UAAACUAGCGCGGUCUUUUUU	2	58.5189	3	0.0225547	Output/hfu/cleaveLand_result/t_plot/PC-5p-168795_10_rna-HHC035018.1_129_TPlot.pdf
rna-HHC023005.1:462	osa-miR5083_L-2	rna-HHC023005.1	MSTRG.20202	HHC023005	uncharacterized protein LOC110098070 [Dendrobium catenatum]	GO:0003674(molecular_function);GO:0008150(biological_process)	NA	454	471	462	0.862348	4	((((.(((((((((((((&))))))))))))).))))	UGAUGAGGUGGUUGUAGU&ACUACAAUUAUCUGAUCA	2	58.5189	3	0.0446007	Output/hfu/cleaveLand_result/t_plot/osa-miR5083_L-2_rna-HHC023005.1_462_TPlot.pdf
rna-HHC015857.1:1358	osa-MIR5079a-p3_2ss5GT18TC	rna-HHC015857.1	MSTRG.15107	HHC015857	calcium uptake protein, mitochondrial-like, partial [Asparagus officinalis]	GO:0005509(calcium ion binding);GO:0005623(cell);GO:0005739(mitochondrion);GO:0005743(mitochondrial inner membrane);GO:0005758(mitochondrial intermembrane space);GO:0006816(calcium ion transport);GO:0051562(negative regulation of mitochondrial calcium ion concentration)	NA	1347	1367	1358	0.868167	6	.(((((((((((((((((...&...))))))))))))))))).	GGAGUUUUUGAGAACCAUGCA&CAAAUGGUUCUCAAAAACUCG	1	29.2594	4	0.0306314	Output/hfu/cleaveLand_result/t_plot/osa-MIR5079a-p3_2ss5GT18TC_rna-HHC015857.1_1358_TPlot.pdf
rna-HHC009713.1:131	osa-miR5077_L-1_1ss5GA	rna-HHC009713.1	MSTRG.10812	HHC009713	hypothetical protein AXF42_Ash001226 [Apostasia shenzhenica]	NA	NA	123	140	131	0.940828	3	.(((((((((((((((((&))))))))))))))))).	GGGUGAACCCGAUGUGGA&UUCACGUCGGGUUCACCA	1	29.2594	4	0.0306314	Output/hfu/cleaveLand_result/t_plot/osa-miR5077_L-1_1ss5GA_rna-HHC009713.1_131_TPlot.pdf
MSTRG.31554.2:375	zma-miR156i-3p	MSTRG.31554.2	MSTRG.31554	HHC040299	kinesin-like protein KIN-14H [Asparagus officinalis]	GO:0003777(microtubule motor activity);GO:0005871(kinesin complex);GO:0007018(microtubule-based movement);GO:0016887(ATPase activity)	NA	363	384	375	0.840964	2.5	(((((.((((((((((((((((&)))))))))))))))).)))))	GAUGAAAGAUGGAGCAGUGAGU&GCUCACUGCUCUAUCUGUCAUC	1	29.2594	4	0.0306314	Output/hfu/cleaveLand_result/t_plot/zma-miR156i-3p_MSTRG.31554.2_375_TPlot.pdf
rna-HHC009262.1:614	bdi-miR399d	rna-HHC009262.1	MSTRG.10515	HHC009262	LOW QUALITY PROTEIN: probable ubiquitin-conjugating enzyme E2 24 [Asparagus officinalis]	GO:0005737(cytoplasm);GO:0031625(ubiquitin protein ligase binding);GO:0061630(ubiquitin protein ligase activity)	ko04120(Ubiquitin mediated proteolysis)	603	623	614	0.978102	0.5	(((((((((((((((((((((&)))))))))))))))))))))	CUGGGCAAAUCUCCUUUGGCA&UGCCAAAGGAGAUUUGCCCGG	1	29.2594	4	0.0306314	Output/hfu/cleaveLand_result/t_plot/bdi-miR399d_rna-HHC009262.1_614_TPlot.pdf
MSTRG.14207.1:711	bdi-MIR7781-p3_2ss9CA17AG	MSTRG.14207.1	MSTRG.14207	HHC014676	NA	NA	NA	701	720	711	1	0	((((((((((((((((((((&))))))))))))))))))))	AAACCAAAUUCUUUUCCUCA&UGAGGAAAAGAAUUUGGUUU	1	29.2594	4	0.0306314	Output/hfu/cleaveLand_result/t_plot/bdi-MIR7781-p3_2ss9CA17AG_MSTRG.14207.1_711_TPlot.pdf
MSTRG.29491.2:1068	gma-MIR5368-p5_1ss13CT	MSTRG.29491.2	MSTRG.29491	NA	NA	NA	NA	1060	1077	1068	1	0	((((((((((((((((((&))))))))))))))))))	UCCUGACACAAGGUUAGA&UCUAACCUUGUGUCAGGA	1	29.2594	4	0.0306314	Output/hfu/cleaveLand_result/t_plot/gma-MIR5368-p5_1ss13CT_MSTRG.29491.2_1068_TPlot.pdf
MSTRG.29491.2:1149	gma-MIR5368-p5_2ss13GA17AG	MSTRG.29491.2	MSTRG.29491	NA	NA	NA	NA	1137	1158	1149	1	0	((((((((((((((((((((((&))))))))))))))))))))))	UUCUUCGCCUUCCACCUAAGCU&AGCUUAGGUGGAAGGCGAAGAA	1	29.2594	4	0.0306314	Output/hfu/cleaveLand_result/t_plot/gma-MIR5368-p5_2ss13GA17AG_MSTRG.29491.2_1149_TPlot.pdf
MSTRG.3194.1:25	gma-MIR5368-p5_2ss14GA18AG_1	MSTRG.3194.1	MSTRG.3194	HHC004583	NA	NA	NA	14	34	25	1	0	(((((((((((((((((((((&)))))))))))))))))))))	CUUCGCCUUCCACCUAAGCUG&CAGCUUAGGUGGAAGGCGAAG	1	29.2594	4	0.0306314	Output/hfu/cleaveLand_result/t_plot/gma-MIR5368-p5_2ss14GA18AG_1_MSTRG.3194.1_25_TPlot.pdf
MSTRG.27975.3:418	hbr-MIR6173-p3_1ss18AG	MSTRG.27975.3	MSTRG.27975	NA	NA	NA	NA	410	427	418	1	0	((((((((((((((((((&))))))))))))))))))	CUAGGACUACUGGGGUAU&AUACCCCAGUAGUCCUAG	1	29.2594	4	0.0306314	Output/hfu/cleaveLand_result/t_plot/hbr-MIR6173-p3_1ss18AG_MSTRG.27975.3_418_TPlot.pdf
rna-HHC021150.2:100	aof-miR827_1ss8AG	rna-HHC021150.2	MSTRG.18845	HHC021150	PREDICTED: SPX domain-containing membrane protein OsI_17046 [Elaeis guineensis];SPX domain-containing membrane protein Os06g0129400-like [Asparagus officinalis]	GO:0006817(phosphate ion transport);GO:0009705(plant-type vacuole membrane);GO:0016021(integral component of membrane);GO:0055085(transmembrane transport);GO:1905011(transmembrane phosphate ion transport from cytosol to vacuole)	NA	89	109	100	0.935103	2	.((((((((((((((((((((&)))))))))))))))))))).	GGUUUGUUGAUGGUCAUCUAA&UUAGAUGGCCAUCAACAAACA	1	29.2594	4	0.0306314	Output/hfu/cleaveLand_result/t_plot/aof-miR827_1ss8AG_rna-HHC021150.2_100_TPlot.pdf
rna-HHC004848.1:740	aof-miR168a	rna-HHC004848.1	MSTRG.3330	HHC004848	uncharacterized protein A4U43_C04F5010 [Asparagus officinalis];LOW QUALITY PROTEIN: protein argonaute 1A-like [Asparagus officinalis]	GO:0005515(protein binding)	NA	729	749	740	0.842105	5	.((((((.(((((((((((..&..))))))))))).)))))).	CUCCCGAGCUGCACCAAGCAA&UCGCUUGGUGCAGGUCGGGAA	1	29.2594	4	0.0306314	Output/hfu/cleaveLand_result/t_plot/aof-miR168a_rna-HHC004848.1_740_TPlot.pdf
rna-HHC006707.1:1599	PC-5p-3989_733	rna-HHC006707.1	MSTRG.9067	HHC006707	uncharacterized protein A4U43_C05F1420 [Asparagus officinalis]	GO:0003677(DNA binding);GO:0005516(calmodulin binding);GO:0005634(nucleus);GO:0006351(transcription, DNA-templated);GO:0006355(regulation of transcription, DNA-templated);GO:0006950(response to stress)	NA	1587	1608	1599	0.811146	5.5	.....(((((((((((((((((&))))))))))))))))).....	AUCCCGGUGACAAUCAACAGAA&UUCUGUUGAUUGUCAUCUAAAC	1	29.2594	4	0.0306314	Output/hfu/cleaveLand_result/t_plot/PC-5p-3989_733_rna-HHC006707.1_1599_TPlot.pdf
rna-HHC016693.1:827	aof-miR167b_1ss22AT	rna-HHC016693.1	MSTRG.15791	HHC016693	uncharacterized protein A4U43_C10F7620 [Asparagus officinalis]	GO:0009723(response to ethylene)	NA	815	836	827	0.821002	2.5	(((((.((((((((((((((((&)))))))))))))))).)))))	ACAGAAUAUGCUGGCAGUUUCA&UGAAGCUGCCAGCAUGAUCUGU	1	29.2594	4	0.0306314	Output/hfu/cleaveLand_result/t_plot/aof-miR167b_1ss22AT_rna-HHC016693.1_827_TPlot.pdf
rna-HHC032903.1:933	PC-3p-67585_37	rna-HHC032903.1	MSTRG.26570	HHC032903	uncharacterized protein LOC4334023 [Oryza sativa Japonica Group]	GO:0003729(mRNA binding);GO:0005829(cytosol)	ko03013(RNA transport);ko03008(Ribosome biogenesis in eukaryotes)	922	943	933	0.834568	5.5	(((.((((((((((((((.(((&)))-))))))))))))))-)))	GCCGUGGCCGGGGGAACUAUGC&GCA-AGUUUCCCUGGCUA-GGC	1	29.2594	4	0.0306314	Output/hfu/cleaveLand_result/t_plot/PC-3p-67585_37_rna-HHC032903.1_933_TPlot.pdf
