# Supplementary material for: Integration of mRNA and miRNA Analysis Reveals the Post-Transcriptional Regulation of Salt Stress Response in Hemerocallis fulva
Source: Int J Mol Sci. 2023 Apr 14;24(8):7290. doi: 10.3390/ijms24087290 (PMC10139057; doi:10.3390/ijms24087290)
Supplement: Supplementary file 1 [file ijms-24-07290-s001.zip › Table S12.xlsx]

## Sheet: Sheet1
Table S12 The differential expression miRNA-mRNA targets identified by degradome
miR_name	NT_root(1norm)	NT_root(2norm)	NT_root(3norm)	NaCl_root(1norm)	NaCl_root(2norm)	NaCl_root(3norm)	Targets from Degradome	NT_root(1fpkm)	NT_root(2fpkm)	NT_root(3fpkm)	NaCl_root(1fpkm)	NaCl_root(2fpkm)	NaCl_root(3fpkm)	Regulation	Significant	annotation
osa-MIR5076-p3_2ss16GC17TC	8.20463	14.0435	14.8409	0	4.93928	0	MSTRG.1631.4	9.77638	15.5275	13.1065	4.9211	1.19735	1.35993	down	yes	probable cellulose synthase A catalytic subunit 3 [UDP-forming] [Ananas comosus];uncharacterized protein A4U43_C05F16180 [Asparagus officinalis];Cellulose synthase [Cinnamomum micranthum f. kanehirae]
aof-miR396b_L-1R-1	9.84555	8.39184	21.1198	54.271	34.2222	54.7585	MSTRG.6649.1	0.830657	1.69277	1.4943	3.09004	25.9805	0.000618	up	yes	uncharacterized protein A4U43_C07F36430 [Asparagus officinalis]
aof-miR396b_L-1R-1	9.84555	8.39184	21.1198	54.271	34.2222	54.7585	rna-HHC044133.1	0.411718	3.14615	1.69298	4.68624	11.478	2.2001	up	yes	uncharacterized protein A4U43_C07F36430 [Asparagus officinalis]
aof-miR396b_L-1R-1	9.84555	8.39184	21.1198	54.271	34.2222	54.7585	MSTRG.29453.2	0.412142	0.16983	0.406796	1294.03	1639.98	2.84351	up	yes	L-ascorbate peroxidase, cytosolic [Asparagus officinalis]
aof-miR396b_L-1R-1	9.84555	8.39184	21.1198	54.271	34.2222	54.7585	rna-HHC003392.1	0.664751	1.35928	1.55028	0.076135	0.043465	0.472741	down	yes	transcription initiation factor IIA subunit 1-like [Asparagus officinalis]
aof-miR396b_L-1R-1	9.84555	8.39184	21.1198	54.271	34.2222	54.7585	MSTRG.20757.1	29.5023	30.4986	28.9564	8.44697	4.48643	0.573345	down	yes	NA
aof-miR396b_L-1R-1	9.84555	8.39184	21.1198	54.271	34.2222	54.7585	rna-HHC004013.1	621.496	568.761	612.499	143.333	103.274	143.253	down	yes	heat shock protein 81-1 isoform X2 [Asparagus officinalis]
aof-miR396b_L-1R-1	9.84555	8.39184	21.1198	54.271	34.2222	54.7585	MSTRG.30601.1	24.3018	23.559	16.3273	9.30587	3.60384	1.21638	down	yes	growth-regulating factor 4-like [Asparagus officinalis]
aof-miR396b_L-1R-1	9.84555	8.39184	21.1198	54.271	34.2222	54.7585	rna-HHC017623.1	376.587	378.986	386.002	152.289	69.5406	93.4021	down	yes	hypothetical protein DVH24_034431 [Malus domestica]
aof-miR396b_L-1R-1	9.84555	8.39184	21.1198	54.271	34.2222	54.7585	MSTRG.19592.1	1221.74	1208.53	1210.01	348.589	125.385	119.481	down	yes	Tubulin alpha chain [Morus notabilis]
aof-miR396b_L-1R-1	9.84555	8.39184	21.1198	54.271	34.2222	54.7585	rna-HHC044133.1	0.411718	3.14615	1.69298	4.68624	11.478	2.2001	up	yes	uncharacterized protein A4U43_C07F36430 [Asparagus officinalis]
aof-miR396b_L-1R-1	9.84555	8.39184	21.1198	54.271	34.2222	54.7585	MSTRG.6649.3	92.1621	87.9526	112.74	93.8709	1119.63	22.2617	up	yes	uncharacterized protein A4U43_C07F36430 [Asparagus officinalis]
aof-miR396b_L-1R-1	9.84555	8.39184	21.1198	54.271	34.2222	54.7585	MSTRG.6649.3	92.1621	87.9526	112.74	93.8709	1119.63	22.2617	up	yes	uncharacterized protein A4U43_C07F36430 [Asparagus officinalis]
aof-miR396b_L-1R-1	9.84555	8.39184	21.1198	54.271	34.2222	54.7585	MSTRG.6649.1	0.830657	1.69277	1.4943	3.09004	25.9805	0.000618	up	yes	uncharacterized protein A4U43_C07F36430 [Asparagus officinalis]
aof-miR396b_L-1R-1	9.84555	8.39184	21.1198	54.271	34.2222	54.7585	MSTRG.12332.56	0.0001	0.0001	0.0001	85.0793	36.8293	309.831	up	yes	hypothetical protein BVC80_7377g1 [Macleaya cordata];uncharacterized protein LOC110099082 [Dendrobium catenatum]
aof-miR396b_L-1R-1	9.84555	8.39184	21.1198	54.271	34.2222	54.7585	MSTRG.12332.25	0.0001	0.0001	1.15051	37.911	1.25501	18.3722	up	yes	hypothetical protein BVC80_7377g1 [Macleaya cordata];uncharacterized protein LOC110099082 [Dendrobium catenatum]
aof-miR396b_L-1R-1	9.84555	8.39184	21.1198	54.271	34.2222	54.7585	rna-HHC052082.1	60.6829	41.7313	58.8285	476.092	218.105	183.035	up	yes	hypothetical protein, partial [Lilium longiflorum]
aof-miR396b_L-1R-1	9.84555	8.39184	21.1198	54.271	34.2222	54.7585	MSTRG.12332.6	7.46413	0.0001	8.35219	0.0001	0.000298	0.0001	down	yes	hypothetical protein BVC80_7377g1 [Macleaya cordata];uncharacterized protein LOC110099082 [Dendrobium catenatum]
aof-miR396b_L-1R-1	9.84555	8.39184	21.1198	54.271	34.2222	54.7585	rna-HHC052089.1	240.765	225.885	236.219	1461.32	812.293	655.261	up	yes	hypothetical protein, partial [Lilium longiflorum]
aof-miR396b_L-1R-1	9.84555	8.39184	21.1198	54.271	34.2222	54.7585	MSTRG.12332.38	0.0001	0.0001	0.0001	0.0001	111.993	268.028	up	yes	hypothetical protein BVC80_7377g1 [Macleaya cordata];uncharacterized protein LOC110099082 [Dendrobium catenatum]
aof-miR396b_L-1R-1	9.84555	8.39184	21.1198	54.271	34.2222	54.7585	MSTRG.9102.1	0.726979	6.88773	5.25807	61.8477	39.6549	6.61083	up	yes	hypothetical protein VIGAN_UM114500 [Vigna angularis var. angularis];uncharacterized protein LOC110099082 [Dendrobium catenatum]
aof-miR396b_L-1R-1	9.84555	8.39184	21.1198	54.271	34.2222	54.7585	rna-HHC039932.1	45.2377	44.9751	41.8435	856.396	476.564	1136.82	up	yes	PREDICTED: ethylene-responsive transcription factor ERF071-like [Elaeis guineensis]
aof-miR396b_L-1R-1	9.84555	8.39184	21.1198	54.271	34.2222	54.7585	rna-HHC009402.2	2.43677	5.92731	4.58138	0.203454	0.295359	0.142387	down	yes	heat shock protein 81-1 isoform X2 [Asparagus officinalis]
aof-miR396b_L-1R-1	9.84555	8.39184	21.1198	54.271	34.2222	54.7585	rna-HHC052623.1	15.7074	18.8972	16.6404	6.04632	1.28097	0.402175	down	yes	uncharacterized protein A4U43_C03F23250 [Asparagus officinalis]
aof-miR396b_L-1R-1	9.84555	8.39184	21.1198	54.271	34.2222	54.7585	rna-HHC021632.1	0.713644	0.176917	0.081106	0.313884	0.889199	9.32009	up	yes	uncharacterized protein LOC109820818 [Asparagus officinalis]
aof-miR396b_L-1R-1	9.84555	8.39184	21.1198	54.271	34.2222	54.7585	MSTRG.22550.5	10.8226	18.1148	10.243	0.0001	0.0001	0.0001	down	yes	putative thylakoidal processing peptidase 2, chloroplastic [Ananas comosus]
aof-miR396b_L-1R-1	9.84555	8.39184	21.1198	54.271	34.2222	54.7585	MSTRG.33196.1	794.536	801.122	806.878	307.347	140.814	194.081	down	yes	PREDICTED: tubulin alpha chain [Vitis vinifera]
aof-miR396b_L-1R-1	9.84555	8.39184	21.1198	54.271	34.2222	54.7585	rna-HHC035500.1	9.37376	10.5573	12.6106	25.87	31.9442	33.7883	up	yes	acyl-CoA-binding domain-containing protein 3-like isoform X1 [Phoenix dactylifera]
aof-miR396b_L-1R-1	9.84555	8.39184	21.1198	54.271	34.2222	54.7585	MSTRG.18142.1	4.70517	4.53068	5.71741	0.0001	0.981002	0.0001	down	yes	NA
aof-miR396b_L-1R-1	9.84555	8.39184	21.1198	54.271	34.2222	54.7585	rna-HHC044133.1	0.411718	3.14615	1.69298	4.68624	11.478	2.2001	up	yes	uncharacterized protein A4U43_C07F36430 [Asparagus officinalis]
aof-miR396b_L-1R-1	9.84555	8.39184	21.1198	54.271	34.2222	54.7585	rna-HHC030525.1	4.34562	5.42271	4.48573	12.44	15.2906	78.7826	up	yes	uncharacterized protein A4U43_C07F36430 [Asparagus officinalis]
aof-miR396b_L-1R-1	9.84555	8.39184	21.1198	54.271	34.2222	54.7585	MSTRG.12332.40	0.623213	0.0001	0.0001	11.1458	54.8947	0.0001	up	yes	hypothetical protein BVC80_7377g1 [Macleaya cordata];uncharacterized protein LOC110099082 [Dendrobium catenatum]
aof-miR396b_L-1R-1	9.84555	8.39184	21.1198	54.271	34.2222	54.7585	MSTRG.5064.19	3.44659	1.49446	2.97875	16.7675	21.815	31.043	up	yes	PREDICTED: gamma-glutamyltranspeptidase 1 [Elaeis guineensis];Gamma-glutamyltranspeptidase 1 [Ananas comosus];Gamma-glutamyltranspeptidase [Corchorus capsularis]
aof-miR396b_L-1R-1	9.84555	8.39184	21.1198	54.271	34.2222	54.7585	MSTRG.11490.1	8.89116	6.79708	10.6539	87.7628	53.471	7.59472	up	yes	hypothetical protein, partial [Lilium longiflorum]
aof-miR396b_L-1R-1	9.84555	8.39184	21.1198	54.271	34.2222	54.7585	MSTRG.6770.1	195.614	181.211	176.987	899.15	540.688	500.131	up	yes	hypothetical protein, partial [Lilium longiflorum];BnaAnng36730D [Brassica napus]
aof-miR396b_L-1R-1	9.84555	8.39184	21.1198	54.271	34.2222	54.7585	rna-HHC046456.1	0.040269	0.043981	1.47103	58.1403	30.5641	69.2044	up	yes	PREDICTED: uncharacterized protein LOC105040466 isoform X3 [Elaeis guineensis];PREDICTED: uncharacterized protein LOC105040466 isoform X1 [Elaeis guineensis]
aof-miR396b_L-1R-1	9.84555	8.39184	21.1198	54.271	34.2222	54.7585	MSTRG.19461.1	13.8582	13.7344	12.8992	152.888	96.3181	91.0895	up	yes	homocysteine S-methyltransferase 2-like [Asparagus officinalis]
aof-miR396b_L-1R-1	9.84555	8.39184	21.1198	54.271	34.2222	54.7585	rna-HHC020256.1	23.0619	15.9642	17.4799	88.0439	78.8923	93.7662	up	yes	transcription repressor OFP7-like [Ananas comosus]
aof-miR396b_L-1R-1	9.84555	8.39184	21.1198	54.271	34.2222	54.7585	rna-HHC021981.1	0.074423	0.372721	0.112076	1.74703	0.685059	1.32416	up	yes	homocysteine S-methyltransferase 2-like [Asparagus officinalis]
aof-miR396b_L-1R-1	9.84555	8.39184	21.1198	54.271	34.2222	54.7585	rna-HHC037689.1	14.3173	12.5119	13.0738	17.5262	55.8133	28.1166	up	yes	sphingosine kinase 1-like isoform X1 [Asparagus officinalis]
aof-miR396b_L-1R-1	9.84555	8.39184	21.1198	54.271	34.2222	54.7585	rna-HHC049019.1	235.257	231.434	232.553	81.1361	69.9964	92.113	down	yes	heat shock protein 81-1 isoform X2 [Asparagus officinalis]
aof-miR396b_L-1R-1	9.84555	8.39184	21.1198	54.271	34.2222	54.7585	rna-HHC052147.1	0.140758	0.374935	0.434907	1.08349	3.2363	2.2843	up	yes	PREDICTED: uncharacterized protein LOC105048063 [Elaeis guineensis]
aof-MIR159-p3_1ss9TA	1772.2	2643.6	2770.69	483.917	338.694	257.766	rna-HHC020189.1	14.8337	15.7909	14.8696	3.09469	1.23748	0.464491	down	yes	putative WEB family protein At1g65010, chloroplastic [Phoenix dactylifera]
aof-MIR159-p3_1ss9TA	1772.2	2643.6	2770.69	483.917	338.694	257.766	MSTRG.26953.1	31.8245	31.7238	30.7187	243.692	211.25	291.407	up	yes	LOW QUALITY PROTEIN: NAC domain-containing protein 68-like [Asparagus officinalis]
aof-MIR159-p3_1ss9TA	1772.2	2643.6	2770.69	483.917	338.694	257.766	rna-HHC038779.1	55.8306	53.9238	52.9553	16.0575	11.2258	3.23698	down	yes	dolichyl-diphosphooligosaccharide--protein glycosyltransferase subunit STT3A [Asparagus officinalis]
aof-MIR159-p3_1ss9TA	1772.2	2643.6	2770.69	483.917	338.694	257.766	rna-HHC048962.1	38.5675	10.2382	24.6551	4.19607	3.10877	2.53269	down	yes	hypothetical protein CCACVL1_23316 [Corchorus capsularis]
aof-MIR159-p3_1ss9TA	1772.2	2643.6	2770.69	483.917	338.694	257.766	MSTRG.19919.2	10.1884	14.5111	10.6183	25.6367	27.9232	39.1161	up	yes	PREDICTED: transcription factor TGA2.2-like isoform X2 [Nelumbo nucifera]
aof-miR166a	3830.47	2395.1	3584.66	1659.79	1061.24	808.69	MSTRG.28391.1	0.784877	1.31532	1.62094	5.6651	3.78741	6.70859	up	yes	NA
osa-MIR171g-p5_2ss5GA21TG_1	580.067	724.61	452.648	203.516	154.882	231.722	MSTRG.29002.2	0.024231	0.017901	0.00046	8.93559	6.12651	6.28599	up	yes	WRKY transcription factor SUSIBA2-like [Asparagus officinalis]
osa-MIR171g-p5_2ss5GA21TG_1	580.067	724.61	452.648	203.516	154.882	231.722	rna-HHC036603.1	24.2395	25.7321	24.5872	0.218768	1.2716	1.4582	down	yes	WRKY transcription factor SUSIBA2-like [Asparagus officinalis]
osa-miR166b-5p_R+1_2ss11CT19GA	10.9395	6.16543	13.1285	0	0	0	MSTRG.33556.1	5.07481	5.51988	5.82329	36.7566	18.6467	59.5001	up	yes	PREDICTED: uncharacterized protein LOC105035338 [Elaeis guineensis]
osa-miR166b-5p_R+1_2ss11CT19GA	10.9395	6.16543	13.1285	0	0	0	rna-HHC051341.1	0.712815	1.0137	0.80234	5.76131	4.08773	8.17545	up	yes	PREDICTED: uncharacterized protein LOC105035338 [Elaeis guineensis]
ptc-MIR166e-p5_2ss19TA21TC	7.11068	4.11029	3.42483	0	2.11684	0	rna-HHC010057.1	144.689	140.799	145.008	446.094	345.797	628.114	up	yes	PREDICTED: calmodulin-like protein 3 [Musa acuminata subsp. malaccensis]
PC-3p-4499_652	116.506	80.4932	63.9302	27.1355	16.9347	26.7115	rna-HHC016952.1	147.162	136.666	144.662	57.3867	37.4703	54.8103	down	yes	hsp70-Hsp90 organizing protein 2-like [Asparagus officinalis]
PC-3p-4499_652	116.506	80.4932	63.9302	27.1355	16.9347	26.7115	rna-HHC032949.1	114.25	112.974	111.396	453.777	1239.28	379.935	up	yes	PREDICTED: thiamine thiazole synthase, chloroplastic [Elaeis guineensis]
PC-3p-4499_652	116.506	80.4932	63.9302	27.1355	16.9347	26.7115	MSTRG.23156.3	0.0001	2.92643	1.97962	0.009268	0.010341	0.031587	down	yes	Serine/arginine-rich splicing factor 33 [Apostasia shenzhenica]
PC-3p-4499_652	116.506	80.4932	63.9302	27.1355	16.9347	26.7115	MSTRG.23156.2	4.26605	1.54821	1.65952	3.3e-05	9.4e-05	0.0002	down	yes	Serine/arginine-rich splicing factor 33 [Apostasia shenzhenica]
aof-miR156a	1090.12	1101.21	617.611	2503.25	3463.5	1913.88	rna-HHC018925.2	10.9727	12.4864	12.4273	0.0001	2.41582	0.200024	down	yes	squamosa promoter-binding-like protein 12 [Asparagus officinalis]
aof-miR156a	1090.12	1101.21	617.611	2503.25	3463.5	1913.88	rna-HHC046533.1	39.8061	33.7919	36.9516	57.1784	274.035	40.3448	up	yes	homeobox-leucine zipper protein HAT5-like [Asparagus officinalis]
ata-miR395a-5p_2ss6CT21GT	0	0	0	38.3812	63.8816	73.7595	MSTRG.27782.3	0.0001	0.069677	1.0985	0.568713	0.0001	57.3543	up	yes	uncharacterized protein A4U43_C05F34080 [Asparagus officinalis]
aof-miR393a	9.24689	8.84577	14.6059	6.77316	0	0	MSTRG.24459.3	0.0001	0.0001	0.0001	0.920291	0.0001	1.72379	up	yes	transport inhibitor response 1-like protein Os04g0395600 [Phoenix dactylifera]
PC-5p-361_8563	4.79468	14.6413	0	1174.01	496.857	974.679	MSTRG.17223.7	0.0001	0.0001	0.0001	3.94071	1.96415	0.0001	up	yes	cinnamoyl-CoA reductase 1-like [Phoenix dactylifera];cinnamoyl-CoA reductase 2-like [Asparagus officinalis]
